# Supplementary material for: Transcriptome Analysis Reveals Distinct Gene Expression Profiles in Eosinophilic and Noneosinophilic Chronic Rhinosinusitis with Nasal Polyps
Source: PubMed Central journal article supplement (PMC4877582; doi:10.1038/srep26604), 2016-05-24
Supplement: srep26604-s1.pdf [file srep26604-s1.pdf]

# **Transcriptome Analysis Reveals Distinct Gene Expression Profiles in Eosinophilic and Noneosinophilic Chronic Rhinosinusitis with Nasal Polyps**

Weiqing Wang<sup>1</sup>, Zhiqiang Gao<sup>1</sup>, Huaishan Wang<sup>2</sup>, Taisheng Li<sup>3</sup>, Wei He<sup>2</sup>, Wei Lv<sup>1\*</sup>,  
and Jianmin Zhang<sup>2\*</sup>

<sup>1</sup>Department of Otolaryngology, Peking Union Medical College Hospital, Chinese Academy of Medical Science and Peking Union Medical College, Beijing, China

<sup>2</sup>Department of Immunology, Institute of Basic Medical Sciences, Chinese Academy of Medical Sciences and School of Basic Medicine, Peking Union Medical College, State Key Laboratory of Medical Molecular Biology, Beijing, China

<sup>3</sup>Department of Infectious Disease, Peking Union Medical College Hospital, Chinese Academy of Medical Science and Peking Union Medical College, Beijing, China

\* Address correspondence to Dr. Jianmin Zhang,

Department of Immunology, Institute of Basic Medical Sciences, Chinese Academy of Medical Sciences and School of Basic Medicine, Peking Union Medical College, State Key Laboratory of Medical Molecular Biology,

5 Dongdansantiao Street, Beijing 100730, China.

Tel.: +86 10 69156474, E-mail: jzhang42@gmail.com

or to Dr. Wei Lv,

Department of Otolaryngology, Peking Union Medical College Hospital, Chinese Academy of Medical Science and Peking Union Medical College,

No.1 Shuaifuyuan, Beijing 100730, China.

Tel.: +86 10 69156311, E-mail: lili20020615@sina.com

## **Supplementary Methods**

### **Patients and biopsy specimens**

The study was approved by the Ethics Committee of Peking Union Medical College Hospital. All study participants provided written informed consent and were recruited at Peking Union Medical College Hospital. All experiments were performed in accordance with approved guidelines. A total of 35 patients with ECRSwNP, 31 patients with non-ECRSwNP and 34 control subjects were recruited for the study. The diagnosis of CRSwNP was based on standard criteria issued in the European Position Paper on Rhinosinusitis and Nasal Polyps 2012 guidelines(1). None of the subjects used systemic or topical corticosteroids or other immune-modulating drugs for at least 4 weeks before surgery.

All CRSwNP patients were Chinese with bilateral CRSwNP. The presence of CRS and bilateral NPs was confirmed by means of office endoscopy and computed tomographic imaging. They failed to respond to maximal medical therapy and subsequently underwent functional endoscopic sinus surgery. Nasal polyp tissues from the apex region of polyps were collected during functional endoscopic sinus surgery. Control subjects were patients undergoing endoscopic trans-sphenoid removal of nonfunctioning pituitary adenomas not having inflammatory sinonasal diseases. The sphenoid mucosal tissues of control subjects were collected during the surgery.

The atopic status was evaluated by the Phadiatop test (Phadia, Uppsala, Sweden) to detect IgE antibodies against various common inhalant allergens. Specific IgE values of 0.35 kIU/L or greater were considered positive. The diagnosis of asthma was based on history and pneumologist diagnosis. Subjects who had an immune deficient

disease, antrochoanal polyps, fungal sinusitis, cystic fibrosis, primary ciliary dyskinesia, or gastroesophageal reflux disease were excluded from the study.

The CRSwNP patients were classified based on the tissue eosinophil number, counted in the lamina propria of the polyps in five random microscopic high power fields (HPFs,  $\times 400$  magnification). We defined ECRSwNP as subjects whose tissue eosinophil number per HPF was more than twenty(2), and non-ECRSwNP as not fulfilling the criteria.

### **Sampling of tissue specimens and histological analysis**

The tissues were divided into three parts immediately after harvest from the surgery. One part was fixed in 10% formalin, and later embedded in paraffin for hematoxylin and eosin (HE) staining. The other two parts were immediately snap-frozen in liquid nitrogen and stored at  $-80^{\circ}\text{C}$  for whole transcriptome sequencing and quantitative Real-time PCR (qRT-PCR) experiments. Paraffin sections ( $4\mu\text{m}$ ) were stained with HE dye. In order to determine the degree of eosinophil infiltration, two of the authors independently detected the number of eosinophils per HPF by manually counting five random HPF of lamina propria per specimen in the HE sections. We used a Leica DM3000 light microscope with an N Plan  $40\times/0.65$  lens and an FN 22 eyepiece; this 'HPF' includes an area of  $0.24\text{mm}^2$  on the slide. In cases of disagreement (when 2 average numbers differed by  $>10\%$ ), a consensus was reached by our research team reviewing the specimen together.

### **Whole transcriptome library preparation and sequencing**

Total RNA was isolated from 3 ECRSwNP, 3 non-ECRSwNP and 3 control subjects using Trizol (Invitrogen) according to the manufacturer's instructions. RNA purity was checked using the NanoPhotometer spectrophotometer (IMPLEN, CA, USA). RNA

concentration was measured using Qubit RNA Assay Kit in Qubit 2.0 Fluorometer (Life Technologies, CA, USA). RNA integrity was verified on an Agilent Bioanalyzer 2100 (Agilent Technologies, Palo Alto, CA). Only samples with RNA integrity number (RIN) over 7.0 were used for library construction. A total amount of 3 µg RNA per sample was used as input material for library construction. Ribosomal RNA (rRNA) was removed by Epicentre Ribo-zero rRNA Removal Kit (Epicentre, USA) according to the manufacturer's instructions. Subsequently, strand-specific sequencing libraries were generated with the dUTP method using the resulting RNA by NEBNext Ultra Directional RNA Library Prep Kit for Illumina (NEB, USA) following manufacturer's recommendations. The library quality and quantity was assessed using the Agilent Bioanalyzer 2100 system and qRT-PCR. RNA-seq was performed on an Illumina HiSeq 2000 platform and 100 bp paired-end reads were generated according to Illumina's protocol. The NCBI Gene Expression Omnibus accession number for the RNA-Seq data reported in this paper is GSE72713.

### **RNA-seq data analysis**

(1) Quality control: The raw sequencing data (raw reads) were stored in the FASTQ format. Clean data (clean reads) were obtained by removing reads containing adapter, reads containing N (N means not knowing the base information) for more than 10% of all the bases and low quality reads marked by sequencing platform from raw data. All the down stream analyses were based on the clean data with high quality.

(2) Reads mapping and transcriptome assembly: Clean reads were aligned to the human genome (hg19) using TopHat2 (v2.0.9). The transcriptome of each sample was assembled from the mapped reads separately by both Cufflinks (v2.1.1) (3) and Scripture (beta2) (4).

(3) Transcripts identification pipeline: For mRNA analyses, the RefSeq database (Build 37.3) was chosen as the annotation references. For lncRNA analyses, the GENCODE v19 database was chosen as the annotation references. To identify lncRNA transcripts from the assembled transcripts set, we ran the set through the following filters:

(a) Expression level threshold. The transcripts were reconstructed in at least two different tissues or by both Scripture and Cufflinks in the same tissue with minimal read coverage  $\geq 3$ . This step aimed to distinguish the lowly expressed lncRNAs from the various lowly expressed, unreliable fragments assembled from the RNA-seq data.

(b) Size selection. The transcripts were multiexonic and not smaller than 200 bases. This step aimed to remove transcripts which were not consistent with the definition of lncRNA, or single-exonic, which might result from potential DNA contamination.

(c) Filter of known non-lncRNA annotations. We eliminated all transcripts that overlapped a transcript which included all known protein-coding genes, microRNAs, tRNAs, miscRNA, rRNAs and pseudogenes and retained all transcripts previously annotated as lncRNAs (GENCODE v19) or that have not been annotated thus far.

(d) Positive coding potential threshold. We scored the coding potential of novel transcripts using phylogenetic codon substitution frequency (PhyloCSF) (5). All transcripts with PhyloCSF scores  $>100$  were discarded.

(e) Known protein domain filter. To eliminate protein-coding transcripts thoroughly, we translated every transcript in all three possible reading frames and employed Pfam Scan (v1.3) to detect any of the known protein domains cataloged in the Pfam database (release 27; used both Pfam A and Pfam B) (6). We excluded all transcripts

with a Pfam hit. Finally, the remaining transcripts were considered reliably expressed lncRNAs.

#### (4) Differential Expression Analysis

The read counts of each transcript were normalized to the length of the individual transcript and to the total mapped fragment counts in each sample and expressed as fragments per kilo-base of exon per million fragments mapped (FPKM) of both lncRNAs and mRNAs in each sample. The mRNA and lncRNA differential expression analyses for all pairwise comparisons: ECRSwNP versus CTRL, non-ECRSwNP versus CTRL, and ECRSwNP versus non-ECRSwNP using Cuffdiff (v2.1.1) (3). An adjusted  $P$  value  $<0.05$  (Student's  $t$ -test with Benjamini-Hochberg false discovery rate (FDR) adjustment) was used as the cut-off for significantly differentially expressed genes.

#### (5) GO and KEGG enrichment analysis

Differentially expressed genes were analyzed by enrichment analyses to detect over-represented functional terms present in the genomic background. Gene ontology (GO) analysis was performed using the Goseq R package(7), in which gene length bias was corrected. Kyoto Encyclopedia of Genes and Genomes (KEGG) pathway analysis were performed using KOBAS software(8).

### **Prediction of the function of lncRNAs**

Most of the lncRNAs in current databases have not yet been functionally annotated. Thus the prediction of their functions is based on the functional annotations of their related *cis* and *trans* target mRNAs. We defined potentially *cis*-regulated target genes as protein-coding genes within 100kb in genomic distance from the lncRNA, and potentially *trans*-regulated target genes as protein-coding genes coexpressed with the

lncRNA with Pearson correlation coefficient (PCC) >0.95 or <-0.95 and beyond 100kb in genomic distance from the lncRNA or in different chromosomes. We analyzed the expression correlation of lncRNA:*cis*-mRNA pairs and lncRNA:*trans*-mRNA pairs by calculating PCC.

### **Quantitative Real-time PCR**

Total RNA was isolated using Trizol (Invitrogen) following the manufacturer's instruction. The cDNA was synthesized using Superscript III (Invitrogen). All qRT-PCR primers (Table S8) were verified to produce specific PCR product and to react efficiently. All qRT-PCR reactions were performed on a Roche Lightcycler480 real-time PCR system using TOYOBO Thunderbird SYBR qRT-PCR Mix (TOYOBO, OSAKA JAPAN) with technical triplicates. Relative quantification of target genes was performed using the  $2^{-\Delta\Delta Ct}$  method with *GAPDH* as a reference gene.

### ***In situ* hybridization**

*In situ* hybridization analyses for lncRNA XLOC\_010280 were performed on paraffin-embedded sections. Briefly, paraffin embedded sections (6 $\mu$ m) were deparaffinized and rehydrated. Then, tissue sections were hybridized with digoxigenin (DIG)-labeled XLOC\_010280 antisense probe (5'-GTTTAAACACAGCGCCCTAGTCACTACATGACTAATAAATAGACAAATGACTGAAACATGACCTCATGCTTTCTATTCTCCAGCTTTCATTCAGTTCTTTGCCTCTGGGAGGAGGAAGGGTTGTGCAGCCCTCCACAGCATCAGCCCATCAACCCTATCCCTGTGGTTATAGCAGCTGAGGAAGCAGAATTGCAGCTCT-3', Biosense Biotechnology, Guangzhou, China) or sense control probe at 42°C overnight. Slides were then washed and incubated with Biotinylated Mouse anti-DIG antibody (Boster Biotechnology, Wuhan, China) for 30 min at 37°C. Color development was achieved

with 3,3'-diaminobenzidine (DAB) (Boster Biotechnology).

## References

1. Fokkens WJ, Lund VJ, Mullol J, Bachert C, Alobid I, Baroody F, et al. European Position Paper on Rhinosinusitis and Nasal Polyps 2012. *Rhinol Suppl* 2012(23):3 p preceding table of contents, 1-298.
2. Wang ET, Zheng Y, Liu PF, Guo LJ. Eosinophilic chronic rhinosinusitis in East Asians. *World J Clin Cases* 2014;**2**(12):873-882.
3. Trapnell C, Williams BA, Pertea G, Mortazavi A, Kwan G, van Baren MJ, et al. Transcript assembly and quantification by RNA-Seq reveals unannotated transcripts and isoform switching during cell differentiation. *Nat Biotechnol* 2010;**28**(5):511-515.
4. Guttman M, Garber M, Levin JZ, Donaghey J, Robinson J, Adiconis X, et al. Ab initio reconstruction of cell type-specific transcriptomes in mouse reveals the conserved multi-exonic structure of lincRNAs. *Nat Biotechnol* 2010;**28**(5):503-510.
5. Lin MF, Jungreis I, Kellis M. PhyloCSF: a comparative genomics method to distinguish protein coding and non-coding regions. *Bioinformatics* 2011;**27**(13):i275-282.
6. Punta M, Coggill PC, Eberhardt RY, Mistry J, Tate J, Boursnell C, et al. The Pfam protein families database. *Nucleic Acids Res* 2012;**40**(Database issue):D290-301.
7. Young MD, Wakefield MJ, Smyth GK, Oshlack A. Gene ontology analysis for RNA-seq: accounting for selection bias. *Genome Biol* 2010;**11**(2):R14.
8. Mao X, Cai T, Olyarchuk JG, Wei L. Automated genome annotation and pathway identification using the KEGG Orthology (KO) as a controlled vocabulary. *Bioinformatics* 2005;**21**(19):3787-3793.



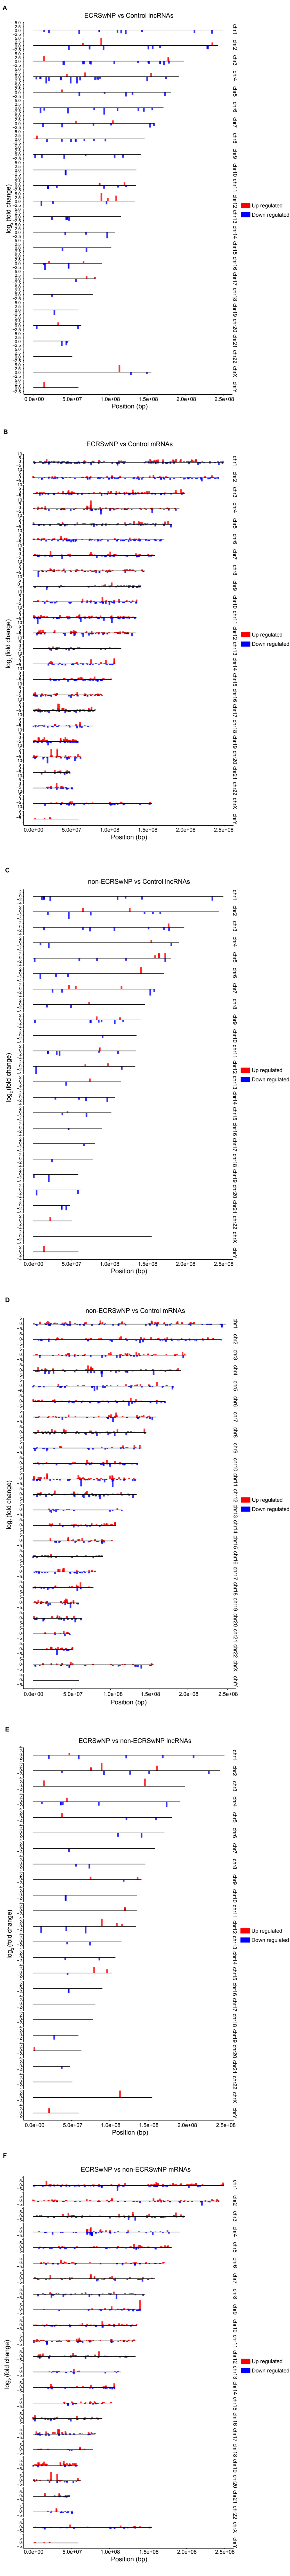

**Figure S1. Chromosomal locations of differentially expressed lncRNAs and mRNAs.** (A-B) Differentially expressed lncRNAs (A) and mRNAs (B) between ECRSwNP and Control group. (C-D) Differentially expressed lncRNAs (C) and mRNAs (D) between non-ECRSwNP and Control group. (E-F) Differentially expressed lncRNAs (E) and mRNAs (F) between ECRSwNP and non-ECRSwNP group. The y-axis represents their log<sub>2</sub> fold change and x-axis represents their chromosomal locations.

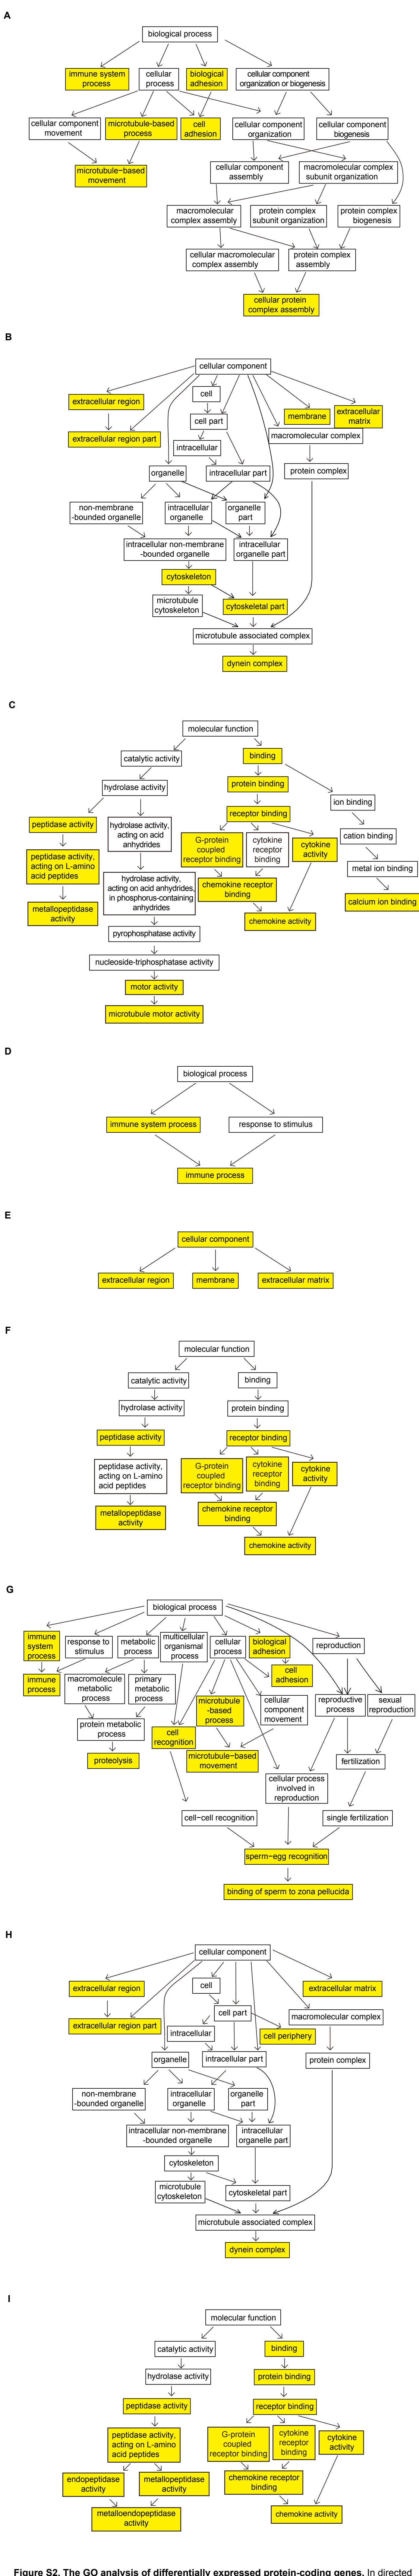

**Figure S2. The GO analysis of differentially expressed protein-coding genes.** In directed acyclic graph (DAG) the downstream term is a subset of the upstream term. The statistically over-represented GO terms are marked in yellow. (A-C) The DAG of over-represented biological process (A), cellular component (B), and molecular function (C) terms in GO analysis between ECRSwNP and Control group. (D-F) The DAG of over-represented biological process (D), cellular component (E), and molecular function (F) terms in GO analysis between non-ECRSwNP and Control group. (G-I) The DAG of over-represented biological process (G), cellular component (H), and molecular function (I) terms in GO analysis between ECRSwNP and non-ECRSwNP group.

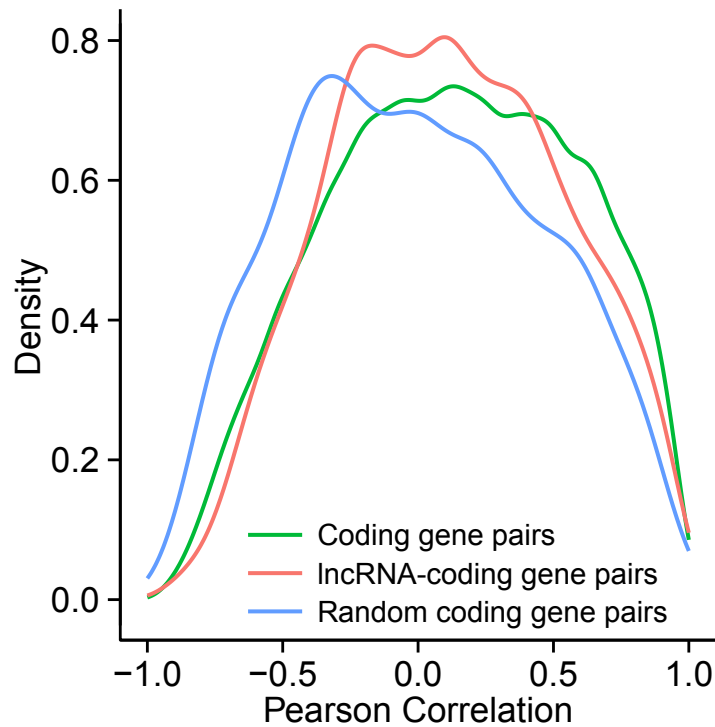

**Figure S3. Correlation of expression patterns between pairs of neighboring genes.** Density distributions of Pearson correlation coefficients in expression levels are analyzed among coding gene neighbors (green), lncRNAs and their neighboring coding gene (red), and random pairs of protein-coding genes (blue).

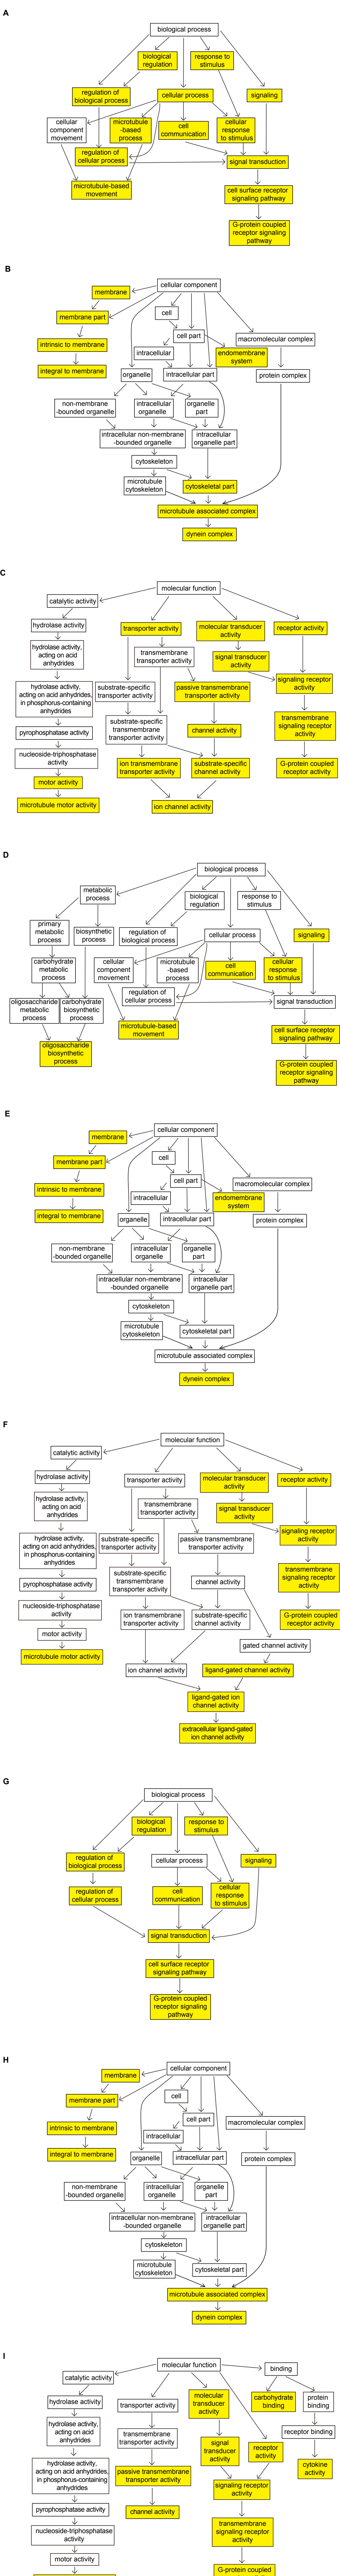

**Figure S4. The GO analysis of predicted trans-regulated target protein-coding genes of differentially expressed lncRNAs.** In directed acyclic graph (DAG) the downstream term is a subset of the upstream term. The statistically over-represented GO terms are marked in yellow. (A-C) The DAG of over-represented biological process (A), cellular component (B), and molecular function (C) terms in GO analysis between ECRSwNP and Control group. (D-F) The DAG of over-represented biological process (D), cellular component (E), and molecular function (F) terms in GO analysis between non-ECRSwNP and Control group. (G-I) The DAG of over-represented biological process (G), cellular component (H), and molecular function (I) terms in GO analysis between ECRSwNP and non-ECRSwNP group.

**Table S1. The data yields and mapping conditions of each sample in RNA-seq.**

| Sample name              | Ctrl_1               | Ctrl_2               | Ctrl_3               | ECRSwNP_1             | ECRSwNP_2             | ECRSwNP_3            | non-ECRSwNP_1        | non-ECRSwNP_2        | non-ECRSwNP_3         |
|--------------------------|----------------------|----------------------|----------------------|-----------------------|-----------------------|----------------------|----------------------|----------------------|-----------------------|
| Raw reads                | 114468362            | 110800134            | 108048076            | 114186598             | 115703956             | 106189180            | 109985166            | 109714356            | 128170192             |
| Clean reads              | 106130072            | 106252622            | 103355394            | 109364286             | 110898200             | 101838586            | 104328114            | 104064708            | 122760360             |
| Total mapped*            | 97557166<br>(91.92%) | 97899889<br>(92.14%) | 97623477<br>(94.45%) | 102669396<br>(93.88%) | 103785494<br>(93.59%) | 95567031<br>(93.84%) | 95245291<br>(91.29%) | 95307506<br>(91.58%) | 113887310<br>(92.77%) |
| Multiple mapped*         | 2845670<br>(2.68%)   | 3144533<br>(2.96%)   | 2276128 (2.2%)       | 2848626 (2.6%)        | 2214910 (2%)          | 2460852<br>(2.42%)   | 2402037<br>(2.3%)    | 2818124<br>(2.71%)   | 3440474<br>(2.8%)     |
| Uniquely mapped*         | 94711496<br>(89.24%) | 94755356<br>(89.18%) | 95347349<br>(92.25%) | 99820770<br>(91.27%)  | 101570584<br>(91.59%) | 93106179<br>(91.43%) | 92843254<br>(88.99%) | 92489382<br>(88.88%) | 110446836<br>(89.97%) |
| Reads map to '+' strand* | 47351657<br>(44.62%) | 47356733<br>(44.57%) | 47659081<br>(46.11%) | 49929217<br>(45.65%)  | 50699722<br>(45.72%)  | 46544789<br>(45.7%)  | 46393912<br>(44.47%) | 46268483<br>(44.46%) | 55258137<br>(45.01%)  |
| Reads map to '-' strand* | 47359839<br>(44.62%) | 47398623<br>(44.61%) | 47688268<br>(46.14%) | 49891553<br>(45.62%)  | 50870862<br>(45.87%)  | 46561390<br>(45.72%) | 46449342<br>(44.52%) | 46220899<br>(44.42%) | 55188699<br>(44.96%)  |
| Non-splice reads*        | 88808686<br>(83.68%) | 85058090<br>(80.05%) | 85555747<br>(82.78%) | 87935155<br>(80.41%)  | 89924832<br>(81.09%)  | 82985611<br>(81.49%) | 79929736<br>(76.61%) | 83723684<br>(80.45%) | 98363786<br>(80.13%)  |
| Splice reads*            | 5902810<br>(5.56%)   | 9697266<br>(9.13%)   | 9791602<br>(9.47%)   | 11885615<br>(10.87%)  | 11645752<br>(10.5%)   | 10120568<br>(9.94%)  | 12913518<br>(12.38%) | 8765698<br>(8.42%)   | 12083050<br>(9.84%)   |

\*Numbers in the brackets stand for the percentages of clean reads.

**Table S2. Characteristics of all of the lncRNAs identified in this study.**

| Transcript ID     | Gene ID           | Gene Name     | Transcript Type    | Transcript Length | Chromosome | Transcript Start | Transcript End | Strand | Exon Number | Ctrl_1  | Ctrl_2   | Ctrl_3   | ECRSwNP _1 | ECRSwNP _2 | ECRSwNP _3 | non-ECRSwNP _1 | non-ECRSwNP _2 | non-ECRSwNP _3 |
|-------------------|-------------------|---------------|--------------------|-------------------|------------|------------------|----------------|--------|-------------|---------|----------|----------|------------|------------|------------|----------------|----------------|----------------|
| ENST00000428504.1 | ENSG00000228327.2 | RP11-206L10.2 | lincRNA            | 1317              | chr1       | 720237           | 714006         | -      | 7           | 10.6818 | 11.6694  | 8.8324   | 12.9021    | 8.60499    | 15.3168    | 6.87741        | 10.694         | 10.8262        |
| TCONS_0005701     | XLOC_000081       | -             | lincRNA            | 731               | chr1       | 1210155          | 1214753        | +      | 3           | 0.95824 | 0.93894  | 1.32932  | 0.966796   | 0.466762   | 1.32935    | 0.335345       | 10.7395        | 0.766975       |
| TCONS_00013785    | XLOC_000122       | -             | intronic_lincRNA   | 307               | chr1       | 3466292          | 3467059        | +      | 2           | 0       | 0        | 0        | 1.8079     | 0          | 0.666249   | 1.19688        | 0.805181       | 1.12074        |
| TCONS_00018121    | XLOC_001455       | -             | lincRNA            | 456               | chr1       | 4378028          | 4379740        | -      | 2           | 0.39578 | 0.84389  | 0.28073  | 0.503226   | 1.71391    | 0.277175   | 1.66388        | 0.973062       | 0.22984        |
| TCONS_00018124    | XLOC_001465       | -             | lincRNA            | 368               | chr1       | 6260705          | 6266075        | -      | 2           | 0       | 0        | 0        | 0          | 0.754141   | 0.424225   | 0              | 0.50315        | 1.41554        |
| ENST00000412639.2 | ENSG00000234546.2 | RP3-510D11.2  | lincRNA            | 985               | chr1       | 9242263          | 9252148        | +      | 3           | 1.55766 | 0.99473  | 2.4147   | 0.408264   | 1.57318    | 1.07735    | 1.95127        | 1.75411        | 1.4034         |
| TCONS_00006803    | XLOC_001488       | -             | intronic_lincRNA   | 1354              | chr1       | 9740074          | 9747626        | -      | 2           | 0.53026 | 0.79791  | 0.90926  | 0.999019   | 1.44134    | 0.915099   | 1.11756        | 1.18866        | 0.701834       |
| TCONS_00012664    | XLOC_001501       | -             | lincRNA            | 1925              | chr1       | 11371578         | 11376966       | -      | 3           | 1.53812 | 1.55787  | 1.86068  | 0.630859   | 1.88967    | 0.937987   | 0.440246       | 0.373204       | 0.368318       |
| TCONS_00000463    | XLOC_000192       | -             | lincRNA            | 4312              | chr1       | 14153723         | 14172101       | +      | 2           | 3.84944 | 1.2875   | 1.75953  | 0.653422   | 1.43313    | 1.79479    | 0.990412       | 1.01445        | 1.05152        |
| TCONS_00005779    | XLOC_000333       | -             | lincRNA            | 16777             | chr1       | 14219595         | 14523049       | +      | 2           | 10.4124 | 5.04458  | 4.42439  | 1.49517    | 3.70003    | 3.81532    | 1.89756        | 2.56912        | 1.59587        |
| TCONS_00023764    | XLOC_000192       | -             | lincRNA            | 17064             | chr1       | 14219863         | 14559392       | +      | 3           | 16.9833 | 6.93797  | 7.25314  | 1.86359    | 5.19906    | 5.49792    | 2.95395        | 3.74289        | 2.41673        |
| TCONS_00008846    | XLOC_001516       | -             | intronic_lincRNA   | 887               | chr1       | 15414805         | 15416980       | -      | 2           | 1.63091 | 3.30986  | 2.5589   | 0.746659   | 0.809754   | 0.615807   | 0.343783       | 0.826729       | 0.422427       |
| TCONS_00001970    | XLOC_001528       | -             | lincRNA            | 757               | chr1       | 16542415         | 16543688       | -      | 2           | 0.36547 | 1.02249  | 0.63314  | 0.460757   | 1.22306    | 0.886907   | 1.27738        | 0.730688       | 1.14842        |
| TCONS_00003383    | XLOC_000243       | -             | lincRNA            | 4161              | chr1       | 20523818         | 20530457       | +      | 3           | 4.38283 | 3.06538  | 3.81159  | 0.597588   | 0.852411   | 1.36624    | 3.96624        | 3.36217        | 3.63886        |
| TCONS_00012726    | XLOC_001573       | -             | intronic_lincRNA   | 3939              | chr1       | 22463123         | 22467367       | -      | 2           | 2.45801 | 1.756    | 2.28906  | 0.239546   | 2.16744    | 0.50759    | 0.295731       | 0.49357        | 0.431786       |
| TCONS_00025889    | XLOC_001596       | -             | lincRNA            | 496               | chr1       | 24822766         | 24828953       | -      | 3           | 3.08406 | 0.48516  | 0        | 0          | 0.844525   | 1.19599    | 2.04254        | 1.11659        | 1.31029        |
| TCONS_00006901    | XLOC_001596       | -             | lincRNA            | 372               | chr1       | 24822865         | 24826292       | -      | 2           | 0.0004  | 6.68E-05 | 1.69806  | 0.751138   | 0.368066   | 0.0017709  | 6.28E-05       | 0              | 1.86164        |
| TCONS_00005879    | XLOC_000333       | -             | lincRNA            | 421               | chr1       | 31199514         | 31201046       | +      | 2           | 0.45781 | 1.30756  | 0.65387  | 0          | 0.569171   | 0.321549   | 0.277393       | 0              | 0.801385       |
| TCONS_00010014    | XLOC_000388       | -             | lincRNA            | 289               | chr1       | 38568097         | 38569434       | +      | 2           | 1.10352 | 0        | 2.51415  | 0          | 0.71713    | 0.796597   | 0.723977       | 0              | 0.67234        |
| TCONS_00010015    | XLOC_000391       | -             | lincRNA            | 771               | chr1       | 39508189         | 39513847       | +      | 3           | 2.49581 | 0.99718  | 1.48169  | 1.34827    | 2.16868    | 1.60654    | 0.518912       | 0.427485       | 0.407268       |
| TCONS_00020825    | XLOC_000412       | -             | lincRNA            | 771               | chr1       | 41898873         | 41930804       | +      | 3           | 0.01387 | 0.12462  | 0.12345  | 0.906128   | 0.650569   | 1.93062    | 2.20235        | 0.56998        | 0.522392       |
| TCONS_00013963    | XLOC_000412       | -             | lincRNA            | 888               | chr1       | 41898883         | 41931007       | +      | 2           | 0.87677 | 2.65E-05 | 2.45E-05 | 2.97624    | 2.99E-05   | 1.67845    | 2.89888        | 0              | 0.495145       |
| TCONS_00009052    | XLOC_001763       | -             | lincRNA            | 1148              | chr1       | 45253604         | 45258474       | -      | 3           | 1.29044 | 1.8698   | 2.66085  | 0.946195   | 0.130105   | 0.668698   | 0.371873       | 1.53478        | 0.916327       |
| TCONS_00010064    | XLOC_000455       | -             | lincRNA            | 812               | chr1       | 46598952         | 46600903       | +      | 2           | 1.83007 | 0.69734  | 0.57541  | 0.314416   | 0.707713   | 0.576329   | 1.35366        | 0.796808       | 0.379735       |
| TCONS_00019022    | XLOC_000467       | -             | lincRNA            | 2384              | chr1       | 47375299         | 47377874       | +      | 2           | 2.89773 | 1.6503   | 1.91485  | 0.527464   | 4.84032    | 3.7997     | 0.747833       | 1.58258        | 1.55928        |
| TCONS_00010075    | XLOC_000477       | -             | lincRNA            | 2318              | chr1       | 50889646         | 50892499       | +      | 3           | 0.6265  | 0.43381  | 0.95447  | 0.060435   | 1.21887    | 0.365261   | 0.826361       | 0.455473       | 0.354305       |
| TCONS_00000816    | XLOC_000492       | -             | lincRNA            | 362               | chr1       | 53132934         | 53134283       | +      | 2           | 2.48732 | 0.89861  | 0.90387  | 0.797778   | 0.391423   | 0          | 1.1565         | 0.522685       | 1.10203        |
| ENST00000449958.1 | ENSG00000230138.1 | RP11-117D22.2 | lincRNA            | 850               | chr1       | 53832340         | 53833917       | -      | 2           | 0.15668 | 0.32811  | 0.43305  | 0.295982   | 0.190279   | 0.325501   | 0.545583       | 0.499699       | 1.07203        |
| TCONS_00011012    | XLOC_001829       | -             | lincRNA            | 643               | chr1       | 54878636         | 54879380       | -      | 2           | 0.91813 | 0.48333  | 0.63949  | 1.15967    | 0          | 0.318997   | 0.269215       | 0.738207       | 0.263217       |
| TCONS_00002339    | XLOC_001830       | -             | lincRNA            | 563               | chr1       | 54982451         | 54994454       | -      | 3           | 2.23858 | 0.39431  | 3.13559  | 0.177071   | 2.74483    | 0.779611   | 0.826428       | 1.81032        | 1.44955        |
| TCONS_00007092    | XLOC_001849       | -             | lincRNA            | 869               | chr1       | 58797260         | 58801922       | -      | 2           | 1.37017 | 1.27487  | 1.36691  | 0.191701   | 1.38621    | 1.05407    | 2.03092        | 0.970613       | 1.04133        |
| TCONS_00000840    | XLOC_000521       | -             | lincRNA            | 609               | chr1       | 59180299         | 59181451       | +      | 2           | 1.9121  | 0.52405  | 1.11128  | 0.203459   | 1.10086    | 1.2099     | 1.1764         | 1.32636        | 0.894721       |
| TCONS_00000841    | XLOC_000521       | -             | lincRNA            | 849               | chr1       | 59180517         | 59184024       | +      | 3           | 0.83259 | 0.87632  | 0.28118  | 0.464877   | 0.739135   | 0          | 0.997246       | 1.17318        | 1.04954        |
| TCONS_00000842    | XLOC_000524       | -             | lincRNA            | 4447              | chr1       | 59276786         | 59281987       | +      | 2           | 3.27026 | 1.51244  | 2.30953  | 0.72302    | 1.66213    | 1.48946    | 1.15061        | 1.62429        | 1.6153         |
| TCONS_00010095    | XLOC_000525       | -             | lincRNA            | 2053              | chr1       | 59486093         | 59509603       | +      | 3           | 0.88114 | 0.30498  | 1.20412  | 0.119203   | 0.366568   | 0.25946    | 0.313906       | 1.21901        | 2.08796        |
| TCONS_00014008    | XLOC_000525       | -             | lincRNA            | 432               | chr1       | 59486116         | 59487411       | +      | 2           | 0.00069 | 0.00219  | 0.0035   | 0.430417   | 0.799699   | 0.356692   | 1.06429        | 1.76739        | 0              |
| TCONS_00002363    | XLOC_001856       | -             | lincRNA            | 3621              | chr1       | 60427121         | 60434026       | -      | 2           | 2.47741 | 0.49535  | 0.67137  | 0.187018   | 0.376926   | 0.102742   | 0.170167       | 0.422277       | 0.724839       |
| TCONS_00010101    | XLOC_000534       | -             | lincRNA            | 711               | chr1       | 62102650         | 62114107       | +      | 2           | 0.99558 | 1.95218  | 1.79693  | 0.125597   | 0.242618   | 0          | 0.581312       | 0.957222       | 0.455613       |
| TCONS_00023934    | XLOC_000540       | -             | lincRNA            | 396               | chr1       | 63705311         | 63708496       | +      | 2           | 0.51547 | 0        | 0        | 0.329282   | 0          | 0          | 1.25958        | 0              | 0              |
| ENST00000448344.1 | ENSG00000231485.1 | RP4-535B20.1  | lincRNA            | 310               | chr1       | 65532310         | 65533420       | -      | 2           | 3.62    | 4.66     | 6.08446  | 1.17307    | 3.48642    | 0          | 1.16268        | 3.13037        | 3.27019        |
| TCONS_00014028    | XLOC_000555       | -             | lincRNA            | 247               | chr1       | 66169966         | 66185518       | +      | 2           | 0       | 1.43774  | 0        | 1.25249    | 0          | 0          | 0              | 0              | 0              |
| TCONS_00014038    | XLOC_000563       | -             | lincRNA            | 1150              | chr1       | 68027734         | 68041795       | +      | 2           | 0.21462 | 0.4478   | 0.07376  | 0.202328   | 0.064915   | 0          | 0.865854       | 0.255253       | 0.548632       |
| TCONS_00026900    | XLOC_000573       | -             | lincRNA            | 667               | chr1       | 71225848         | 71255026       | +      | 3           | 0       | 0        | 0.00126  | 0          | 0.003338   | 0          | 0              | 0.359423       | 2.97E-05       |
| TCONS_00010142    | XLOC_000573       | -             | lincRNA            | 1126              | chr1       | 71226041         | 71251883       | +      | 2           | 0.33026 | 0.53606  | 0.45348  | 1.2455     | 0.79762    | 0.15214    | 1.26942        | 2.00334        | 0.312728       |
| ENST00000455406.1 | ENSG00000229956.5 | ZRANB2-AS2    | lincRNA            | 783               | chr1       | 71547007         | 71703406       | +      | 4           | 2.79385 | 0.61029  | 2.29699  | 1.87061    | 1.48652    | 3.38871    | 2.43843        | 3.34835        | 1.49552        |
| TCONS_00000917    | XLOC_000579       | -             | lincRNA            | 2532              | chr1       | 72765667         | 72813714       | +      | 2           | 2.93287 | 0.84841  | 1.79287  | 0.548846   | 0.948637   | 0.904649   | 1.07519        | 0.792558       | 0.618681       |
| TCONS_00016660    | XLOC_001901       | -             | anti-sense_lincRNA | 4447              | chr1       | 78408146         | 78413468       | -      | 2           | 13.4898 | 9.39045  | 16.265   | 12.0202    | 11.1724    | 15.4407    | 10.1363        | 15.2041        | 14.2391        |
| ENST00000443565.1 | ENSG00000234184.1 | RP5-887A10.1  | lincRNA            | 473               | chr1       | 81106969         | 81112473       | +      | 3           | 0.17707 | 0.79032  | 1.53027  | 4.15631    | 0.917144   | 0.836789   | 2.86167        | 3.53           | 6.25104        |
| TCONS_00010162    | XLOC_000608       | -             | lincRNA            | 716               | chr1       | 81106974         | 81112850       | +      | 2           | 0.89195 | 0        | 0.43448  | 0.544356   | 0          | 0.653802   | 0.589746       | 0.689971       | 1.57427        |
| TCONS_00002427    | XLOC_001907       | -             | lincRNA            | 299               | chr1       | 82529650         | 82531100       | -      | 2           | 1.9994  | 0        | 0.7529   | 0          | 0          | 0          | 0              | 0              | 0              |
| TCONS_00011063    | XLOC_001910       | -             | lincRNA            | 12819             | chr1       | 84203468         | 84326689       | -      | 3           | 0.29829 | 0.00098  | 0.07202  | 0.283981   | 0.0001847  | 0.0001974  | 0.0004665      | 1.88235        | 0.0001444      |
| TCONS_00002428    | XLOC_001910       | -             | lincRNA            | 13743             | chr1       | 84203468         | 84316817       | -      | 2           | 4.72604 | 1.8206   | 1.90473  | 0.804754   | 1.90286    | 2.89124    | 1.55709        | 2.3411         | 1.1986         |
| TCONS_00018393    | XLOC_001910       | -             | lincRNA            | 12526             | chr1       | 84203513         | 84326708       | -      | 2           | 0.00974 | 1.18197  | 1.48367  | 0.44624    | 1.08343    | 1.17781    | 0.464955       | 0.952724       | 1.44112        |
| TCONS_00020088    | XLOC_001910       | -             | lincRNA            | 3772              | chr1       | 84312358         | 84326925       | -      | 2           | 5.78768 | 3.21464  | 4.79904  | 1.58585    | 3.30026    | 4.23102    | 3.06344        | 5.61568        | 3.46659        |
| TCONS_00021564    | XLOC_001918       | -             | lincRNA            | 414               | chr1       | 85184523         | 85215276       | -      | 2           | 0.94523 | 0.67567  | 1.01415  | 0.301387   | 1.47064    | 0.33218    | 0              | 1.56292        | 0              |
| TCONS_00007152    | XLOC_001928       | -             | lincRNA            | 3191              | chr1       | 86730987         | 86781126       | -      | 2           | 1.77509 | 1.25145  | 0.83801  | 0.213922   | 0.49282    | 0.775672   | 1.0126         | 1.10056        | 1.21493        |

|                   |                   |               |                    |       |      |           |           |   |   |         |         |         |           |           |          |           |           |          |
|-------------------|-------------------|---------------|--------------------|-------|------|-----------|-----------|---|---|---------|---------|---------|-----------|-----------|----------|-----------|-----------|----------|
| TCONS_00021576    | XLOC_001928       | -             | lincRNA            | 3961  | chr1 | 86781788  | 86786008  | - | 2 | 2.93237 | 1.82079 | 1.09157 | 0.374227  | 0.81619   | 1.27089  | 1.2843    | 1.10935   | 1.22645  |
| TCONS_00002457    | XLOC_001928       | -             | lincRNA            | 2829  | chr1 | 86792150  | 86795285  | - | 2 | 4.15513 | 2.28398 | 2.2255  | 0.608498  | 0.981444  | 1.6047   | 2.41617   | 2.04701   | 1.93121  |
| TCONS_00014816    | XLOC_001937       | -             | lincRNA            | 615   | chr1 | 88430507  | 88452652  | - | 2 | 0.97976 | 0.34425 | 1.53802 | 2.84543   | 0.510983  | 0.7198   | 0.986443  | 0.421825  |          |
| TCONS_00024663    | XLOC_001937       | -             | lincRNA            | 560   | chr1 | 88430899  | 88442512  | - | 2 | 1.12856 | 0       | 0       | 0.178554  | 0.865022  | 0        | 0.500131  | 1.59758   | 0        |
| TCONS_00006107    | XLOC_000633       | -             | lincRNA            | 466   | chr1 | 89533281  | 89564239  | + | 3 | 3.04822 | 1.35255 | 1.8888  | 0.24209   | 1.41268   | 1.06663  | 1.37012   | 0.623473  | 0.442043 |
| TCONS_00000987    | XLOC_000634       | -             | anti-sense_lincRNA | 2318  | chr1 | 89613469  | 89616437  | + | 2 | 1.9277  | 0.53392 | 1.94185 | 0.060435  | 0.377269  | 0.630905 | 0.41318   | 0.531386  | 0.381559 |
| TCONS_00021596    | XLOC_001963       | -             | lincRNA            | 6498  | chr1 | 94243937  | 94311809  | - | 2 | 2.12454 | 1.71407 | 1.61155 | 1.68591   | 2.70834   | 2.25388  | 2.05793   | 1.88363   | 1.79332  |
| TCONS_00021607    | XLOC_001978       | -             | lincRNA            | 1560  | chr1 | 95081545  | 95086663  | - | 2 | 0.75011 | 0.88474 | 0.25688 | 0.659157  | 1.49368   | 1.3972   | 0.989807  | 0.355542  | 0.467572 |
| TCONS_00013175    | XLOC_001979       | -             | lincRNA            | 10587 | chr1 | 95129225  | 95171795  | - | 3 | 1.52084 | 1.02677 | 1.25492 | 0.68321   | 1.65949   | 2.89395  | 1.13215   | 0.518582  | 0.835525 |
| TCONS_00016751    | XLOC_001979       | -             | lincRNA            | 10164 | chr1 | 95129306  | 95285790  | - | 4 | 0.71248 | 1.12628 | 0.91095 | 0.401733  | 2.73389   | 1.63292  | 1.36635   | 1.19422   | 1.10366  |
| TCONS_00009310    | XLOC_001979       | -             | lincRNA            | 730   | chr1 | 95138471  | 95149978  | - | 3 | 0.53495 | 2.27438 | 1.27049 | 0.24478   | 3.12699   | 0        | 2.00753   | 0.449222  | 0        |
| TCONS_00023250    | XLOC_001979       | -             | lincRNA            | 1755  | chr1 | 95143936  | 95285858  | - | 3 | 2.07084 | 1.3629  | 1.33723 | 1.16796   | 2.81101   | 2.53118  | 1.62341   | 0.876383  | 1.44621  |
| TCONS_00009313    | XLOC_001979       | -             | lincRNA            | 1761  | chr1 | 95208136  | 95285858  | - | 2 | 2.24363 | 2.67735 | 2.16945 | 1.77646   | 4.2845    | 5.50263  | 2.29815   | 2.20551   | 2.9321   |
| TCONS_00005095    | XLOC_001979       | -             | lincRNA            | 9990  | chr1 | 95226177  | 95285808  | - | 2 | 3.32018 | 2.12348 | 2.75323 | 1.45516   | 5.04572   | 4.98492  | 1.97341   | 2.0591    | 2.71438  |
| TCONS_00005102    | XLOC_001983       | -             | anti-sense_lincRNA | 1727  | chr1 | 95613197  | 95699580  | - | 7 | 6.60171 | 4.60958 | 7.48625 | 0.51907   | 1.67466   | 2.15863  | 4.32616   | 3.60739   | 4.43042  |
| TCONS_00014847    | XLOC_001983       | -             | anti-sense_lincRNA | 1497  | chr1 | 95629526  | 95639889  | - | 2 | 4.89403 | 1.36754 | 2.78523 | 0.264011  | 1.61009   | 1.18475  | 1.66507   | 1.33147   | 1.49458  |
| TCONS_00009314    | XLOC_001983       | -             | anti-sense_lincRNA | 1463  | chr1 | 95681927  | 95699636  | - | 3 | 1.28997 | 1.48292 | 1.13968 | 0.115221  | 0.56178   | 0.519515 | 0.887411  | 0.330348  | 0.933757 |
| TCONS_00022281    | XLOC_000661       | -             | lincRNA            | 592   | chr1 | 95714201  | 95718438  | + | 2 | 1.5554  | 2.1884  | 2.17376 | 0.327817  | 1.11073   | 1.98427  | 3.20614   | 1.67316   | 0.595906 |
| TCONS_00009322    | XLOC_001986       | -             | lincRNA            | 605   | chr1 | 99834544  | 99999693  | - | 6 | 0       | 0.84    | 0       | 0         | 0         | 0        | 0         | 0         | 0.213314 |
| TCONS_00007204    | XLOC_001986       | -             | lincRNA            | 663   | chr1 | 99834544  | 99999693  | - | 5 | 0       | 3.91201 | 0.6529  | 0         | 0.738524  | 1.05323  | 6.60801   | 1.28774   | 1.08831  |
| TCONS_00023267    | XLOC_001986       | -             | lincRNA            | 3440  | chr1 | 99888878  | 99999706  | - | 6 | 3.21952 | 0.78947 | 1.45358 | 0.199118  | 0.956568  | 1.04085  | 1.74961   | 1.03098   | 1.93865  |
| TCONS_00005110    | XLOC_001986       | -             | lincRNA            | 3958  | chr1 | 99934635  | 99999574  | - | 6 | 7.37016 | 1.24382 | 0.91498 | 0         | 2.2004    | 0.599632 | 6.05414   | 1.57717   | 2.81765  |
| TCONS_00002518    | XLOC_001986       | -             | lincRNA            | 3887  | chr1 | 99934682  | 99999827  | - | 5 | 0       | 0.2996  | 2.23043 | 5.28E-05  | 0.0004372 | 0.114304 | 0         | 0.0003366 | 0.532487 |
| TCONS_00014850    | XLOC_001986       | -             | lincRNA            | 4106  | chr1 | 99934682  | 99958585  | - | 4 | 0.01694 | 0.00031 | 0.1652  | 0.719402  | 1.24893   | 2.56586  | 0.0020939 | 1.09105   | 0.300901 |
| ENST00000438829.2 | ENSG00000224445.2 | RP11-413P11.1 | lincRNA            | 442   | chr1 | 99937971  | 99999571  | - | 4 | 0       | 0.69988 | 1.25929 | 0.120862  | 0         | 0        | 0.705835  | 0         | 1.91828  |
| TCONS_00014852    | XLOC_001987       | -             | lincRNA            | 273   | chr1 | 100236272 | 100280051 | - | 2 | 7.90958 | 8.8986  | 2.0336  | 1.7302    | 4.33275   | 5.75181  | 7.05624   | 3.53427   | 4.06011  |
| TCONS_00010218    | XLOC_000680       | -             | lincRNA            | 832   | chr1 | 101615967 | 101629344 | + | 2 | 1.12786 | 1.57518 | 0.66833 | 1.72514   | 1.17448   | 1.56244  | 0.935707  | 0.642679  | 1.56235  |
| TCONS_00010241    | XLOC_000716       | -             | lincRNA            | 643   | chr1 | 110613413 | 110617055 | + | 3 | 1.14767 | 1.45    | 1.59872 | 0.289916  | 0.700856  | 0.318997 | 1.07686   | 0.184552  | 0.263217 |
| TCONS_00003861    | XLOC_000716       | -             | lincRNA            | 2713  | chr1 | 110624635 | 110628588 | + | 2 | 5.35045 | 3.74837 | 3.89667 | 0.631707  | 1.36492   | 1.8729   | 1.60085   | 1.21024   | 0.85355  |
| TCONS_00010242    | XLOC_000716       | -             | lincRNA            | 526   | chr1 | 110625802 | 110651653 | + | 2 | 4.1392  | 3.44574 | 5.34687 | 0.827098  | 0.798443  | 1.53448  | 4.06142   | 1.80492   | 1.2263   |
| TCONS_00011136    | XLOC_002037       | -             | lincRNA            | 1222  | chr1 | 112151642 | 112155824 | - | 2 | 1.09743 | 0.69348 | 0.82217 | 1.56707   | 0.361897  | 1.30922  | 0.631814  | 1.10649   | 0.453129 |
| TCONS_00010253    | XLOC_000732       | -             | lincRNA            | 5283  | chr1 | 112170375 | 112179794 | + | 2 | 10.81   | 6.59481 | 12.4497 | 8.34359   | 9.79162   | 11.061   | 7.69879   | 10.9479   | 11.7359  |
| TCONS_00002574    | XLOC_002042       | -             | lincRNA            | 259   | chr1 | 112713844 | 112715760 | - | 2 | 3.15634 | 0       | 0       | 0         | 0         | 0        | 0         | 1.43384   | 1.96654  |
| TCONS_00013233    | XLOC_002043       | -             | lincRNA            | 1741  | chr1 | 112776126 | 112903328 | - | 2 | 0.57713 | 1.92817 | 2.37337 | 0.379215  | 1.66137   | 1.59809  | 5.84705   | 0.940581  | 0.882764 |
| TCONS_00024693    | XLOC_002043       | -             | lincRNA            | 734   | chr1 | 112780421 | 112903317 | - | 2 | 0.24463 | 0       | 0.34573 | 0.345166  | 0.509347  | 0        | 1.2102    | 0         | 0.267685 |
| ENST00000422022.1 | ENSG00000224167.1 | RP3-522D1.1   | lincRNA            | 490   | chr1 | 113392698 | 113420489 | + | 2 | 0.34974 | 0       | 0.98729 | 0.66579   | 0.431169  | 0.244399 | 0.208662  | 0.855329  | 0.404767 |
| TCONS_00010262    | XLOC_000740       | -             | lincRNA            | 945   | chr1 | 113541157 | 113551121 | + | 2 | 1.23079 | 2.00175 | 3.11165 | 1.37677   | 0.74623   | 1.32463  | 0.712303  | 1.41431   | 0.856447 |
| ENST00000441071.1 | ENSG00000235527.2 | RP5-1073O3.7  | anti-sense_lincRNA | 571   | chr1 | 114466622 | 114471940 | - | 3 | 0       | 0       | 0.53972 | 0         | 0         | 0        | 0.206705  | 0         | 0.19036  |
| ENST00000427953.1 | ENSG00000235527.2 | RP5-1073O3.7  | anti-sense_lincRNA | 1321  | chr1 | 114466623 | 114471854 | - | 2 | 1.36459 | 2.08538 | 1.75911 | 1.14275   | 1.15421   | 0.628067 | 1.71163   | 1.15194   | 1.22798  |
| ENST00000448680.1 | ENSG00000233730.1 | RP4-666F24.3  | lincRNA            | 491   | chr1 | 115642293 | 115645279 | + | 2 | 19.1699 | 16.2918 | 24.1029 | 1.7693    | 3.43727   | 8.28075  | 20.9994   | 5.96607   | 12.5038  |
| TCONS_00024037    | XLOC_000749       | -             | lincRNA            | 634   | chr1 | 115822890 | 115824546 | + | 3 | 0.93708 | 1.15146 | 2.28558 | 0.591909  | 0         | 0.488478 | 1.51226   | 0.942313  | 1.07499  |
| TCONS_00018480    | XLOC_002063       | -             | lincRNA            | 242   | chr1 | 116465459 | 116466735 | - | 2 | 2.04171 | 0       | 1.63776 | 1.36234   | 2.76464   | 0        | 0         | 5.69924   | 0        |
| TCONS_00007268    | XLOC_002067       | -             | lincRNA            | 1936  | chr1 | 117045560 | 117047964 | - | 2 | 1.1169  | 1.5887  | 1.56748 | 1.32746   | 1.8068    | 1.90459  | 0.942171  | 1.20518   | 1.56372  |
| TCONS_00010283    | XLOC_000760       | -             | lincRNA            | 375   | chr1 | 118302409 | 118321324 | + | 2 | 0.5764  | 1.24544 | 3.33532 | 3.6909    | 0.723171  | 4.88505  | 1.77559   | 6.74938   | 6.44786  |
| TCONS_00019272    | XLOC_000763       | -             | anti-sense_lincRNA | 1313  | chr1 | 119683178 | 119722041 | + | 4 | 2.3823  | 2.16409 | 3.89782 | 2.53216   | 2.49117   | 1.64474  | 1.79146   | 2.24813   | 1.87153  |
| TCONS_00011178    | XLOC_002080       | -             | lincRNA            | 1099  | chr1 | 120639068 | 120643525 | - | 2 | 0.22677 | 0.15779 | 0.62385 | 0.285107  | 0.617588  | 0.705251 | 0.261612  | 0.359846  | 0.257755 |
| TCONS_00006208    | XLOC_000770       | -             | lincRNA            | 3554  | chr1 | 121116765 | 121124608 | + | 2 | 7.24572 | 5.36841 | 6.66143 | 3.62437   | 3.4236    | 4.33857  | 2.74254   | 2.77585   | 2.99176  |
| TCONS_00012088    | XLOC_000773       | -             | lincRNA            | 793   | chr1 | 121484304 | 121485436 | + | 2 | 664.752 | 454.007 | 201.17  | 90.6499   | 84.2286   | 59.6066  | 154.471   | 449.63    | 202.084  |
| TCONS_00012089    | XLOC_000775       | -             | lincRNA            | 4929  | chr1 | 142794931 | 142807339 | + | 2 | 2.78592 | 1.77599 | 0.98537 | 1.23096   | 0.778704  | 0.460717 | 0.491921  | 0.898786  | 0.329098 |
| TCONS_00024052    | XLOC_000779       | -             | lincRNA            | 980   | chr1 | 143119061 | 143162803 | + | 2 | 2.35143 | 0.6371  | 0.18003 | 0.246532  | 1.6625    | 0.632494 | 4.30565   | 0.726966  | 0        |
| TCONS_00015721    | XLOC_000790       | -             | anti-sense_lincRNA | 4729  | chr1 | 145002892 | 145019052 | + | 3 | 8.90706 | 6.10899 | 4.92984 | 2.61305   | 2.69689   | 3.50718  | 2.55567   | 4.55112   | 4.45471  |
| TCONS_00009427    | XLOC_002094       | -             | lincRNA            | 2518  | chr1 | 145375156 | 145377769 | - | 2 | 1.67345 | 0.945   | 1.98411 | 0.579772  | 0.954381  | 1.36518  | 1.28297   | 1.59473   | 1.17016  |
| TCONS_00007292    | XLOC_002096       | -             | lincRNA            | 443   | chr1 | 145515371 | 145516073 | - | 2 | 2.91729 | 2.37335 | 1.77772 | 1.06068   | 1.80769   | 1.46076  | 0.753138  | 3.42364   | 1.45447  |
| TCONS_00021670    | XLOC_002117       | -             | intronic_lincRNA   | 447   | chr1 | 147234173 | 147237255 | - | 2 | 1.23021 | 0.29176 | 1.16528 | 0.78254   | 1.26983   | 1.72425  | 0.246782  | 1.00984   | 0.238399 |
| TCONS_00005237    | XLOC_002128       | -             | lincRNA            | 893   | chr1 | 148343961 | 148346692 | - | 2 | 2.05778 | 1.3329  | 0.40583 | 1.38783   | 1.15944   | 1.11917  | 1.53339   | 2.45842   | 1.33997  |
| TCONS_00014906    | XLOC_002129       | -             | lincRNA            | 986   | chr1 | 148350887 | 148352179 | - | 2 | 2.07425 | 2.07723 | 2.14364 | 2.28336   | 1.88539   | 2.42094  | 0.524664  | 1.54575   | 1.69668  |
| TCONS_00003974    | XLOC_000814       | -             | lincRNA            | 1024  | chr1 | 148555737 | 148557179 | + | 2 | 1.48413 | 2.58365 | 1.02186 | 2.2556    | 1.87275   | 2.73652  | 1.78611   | 1.76838   | 2.18065  |
| ENST00000442049.1 | ENSG00000223779.4 | RP11-403I13.4 | lincRNA            | 454   | chr1 | 149239894 | 149250552 | + | 3 | 2.79209 | 3.11912 | 3.11318 | 0.253608  | 0.246815  | 1.11751  | 1.91726   | 1.635     | 0.926754 |
| TCONS_00024078    | XLOC_000855       | -             | anti-sense_lincRNA | 957   | chr1 | 151727519 | 151732128 | + | 3 | 2.82645 | 1.12559 | 1.67004 | 0.0846805 | 0.407951  | 0.931111 | 0.93444   | 0.963423  | 0.996001 |
| TCONS_00011224    | XLOC_002164       | -             | lincRNA            | 907   | chr1 | 152019760 | 152021030 | - | 2 | 2.01716 | 0.50242 | 2.08791 |           |           |          |           |           |          |

|                   |                   |               |                    |      |      |           |           |   |     |         |          |          |          |           |           |          |          |           |
|-------------------|-------------------|---------------|--------------------|------|------|-----------|-----------|---|-----|---------|----------|----------|----------|-----------|-----------|----------|----------|-----------|
| TCONS_00017787    | XLOC_000859       | -             | anti-sense_lincRNA | 556  | chr1 | 152287067 | 152307837 | + | 3   | 0.88098 | 0.97124  | 0.92194  | 2.05656  | 2.91279   | 2.23329   | 0.882531 | 1.21034  | 1.46248   |
| TCONS_00006281    | XLOC_000859       | -             | anti-sense_lincRNA | 8336 | chr1 | 152297674 | 152308599 | + | 2   | 1.49    | 1.36292  | 1.12329  | 1.01132  | 1.04389   | 1.7401    | 0.517536 | 0.734558 | 0.690179  |
| TCONS_00008354    | XLOC_000859       | -             | lincRNA            | 1409 | chr1 | 152304096 | 152310643 | + | 3   | 0.00037 | 0.52252  | 0.71661  | 0.901291 | 0         | 1.46063   | 0        | 0.136388 | 0.500046  |
| TCONS_00014935    | XLOC_002179       | -             | lincRNA            | 404  | chr1 | 153530979 | 153533083 | - | 2   | 0       | 0.3548   | 0.35531  | 1.58137  | 3.70705   | 2.78914   | 0.301845 | 0.821432 | 0.289959  |
| TCONS_00022472    | XLOC_000895       | -             | anti-sense_lincRNA | 462  | chr1 | 155165065 | 155167004 | + | 2   | 1.16039 | 0.54945  | 0.54817  | 0.491623 | 0.717354  | 1.6246    | 0.928006 | 0.949992 | 1.12233   |
| TCONS_00007393    | XLOC_002237       | -             | lincRNA            | 411  | chr1 | 156647384 | 156647882 | - | 2   | 0.47926 | 0.34275  | 0.34305  | 0.305705 | 0.596831  | 0.336954  | 1.1651   | 2.37911  | 0.840312  |
| TCONS_00014254    | XLOC_000922       | -             | lincRNA            | 871  | chr1 | 157152522 | 157155259 | + | 2   | 0.45537 | 0.21184  | 0.10483  | 1.14677  | 0.184273  | 1.57637   | 0.616229 | 0.84672  | 1.21124   |
| TCONS_00011284    | XLOC_002252       | -             | lincRNA            | 212  | chr1 | 157622833 | 157624011 | - | 2   | 0       | 0        | 6.3004   | 0        | 0         | 0         | 0        | 0        | 0         |
| TCONS_00011287    | XLOC_002257       | -             | lincRNA            | 301  | chr1 | 158101935 | 158116600 | - | 2   | 0.98112 | 0.72469  | 2.21325  | 0.637464 | 0.632974  | 0         | 0        | 0.854187 | 0         |
| TCONS_00013414    | XLOC_002274       | -             | anti-sense_lincRNA | 995  | chr1 | 159779495 | 159796387 | - | 2   | 0.25635 | 1.33928  | 2.1191   | 0.725609 | 0.621298  | 1.1524    | 1.40772  | 1.62991  | 2.18783   |
| ENST00000528818.1 | ENSG00000232995.3 | RP11-267N12.3 | lincRNA            | 574  | chr1 | 163288628 | 163291531 | - | 2   | 5.97607 | 3.82544  | 6.84264  | 1.89021  | 4.82644   | 3.40435   | 3.36554  | 5.70612  | 3.90634   |
| TCONS_00017868    | XLOC_001000       | -             | lincRNA            | 1620 | chr1 | 168808648 | 168871350 | + | 3   | 3.52045 | 2.79081  | 5.2635   | 2.3898   | 2.16715   | 0.446019  | 5.56215  | 5.21977  | 4.19246   |
| TCONS_00004123    | XLOC_001005       | -             | anti-sense_lincRNA | 2503 | chr1 | 169831754 | 169842893 | + | 2   | 2.26057 | 2.02507  | 1.21035  | 0.805856 | 1.33418   | 1.31301   | 1.19009  | 0.977052 | 1.3031    |
| TCONS_00006415    | XLOC_001006       | -             | lincRNA            | 3576 | chr1 | 170285698 | 170442886 | + | 3   | 0.84689 | 1.96603  | 0.4948   | 1.42135  | 1.07312   | 1.06195   | 0.707019 | 1.11735  | 0.136654  |
| TCONS_00005401    | XLOC_002357       | -             | anti-sense_lincRNA | 1620 | chr1 | 170832603 | 171220971 | - | 3   | 4.00261 | 1.53931  | 2.0787   | 3.8554   | 1.80589   | 0.914817  | 1.13154  | 1.50585  | 1.14761   |
| TCONS_00017055    | XLOC_002357       | -             | anti-sense_lincRNA | 5073 | chr1 | 171086240 | 171108163 | - | 2   | 9.43127 | 3.01242  | 5.59449  | 2.76983  | 2.87153   | 1.39897   | 2.11227  | 2.79754  | 1.98714   |
| TCONS_00021763    | XLOC_002357       | -             | anti-sense_lincRNA | 594  | chr1 | 171216591 | 171220979 | - | 2   | 4.71718 | 8.00323  | 2.29633  | 4.15779  | 1.7893    | 1.71217   | 1.4483   | 0.927711 | 4.41749   |
| TCONS_00002919    | XLOC_002360       | -             | intronic_lincRNA   | 4552 | chr1 | 172105344 | 172113585 | - | 3   | 9.21576 | 14.1585  | 8.97151  | 6.34713  | 7.60506   | 4.63303   | 12.5135  | 10.1762  | 5.07496   |
| TCONS_00005406    | XLOC_002360       | -             | intronic_lincRNA   | 5328 | chr1 | 172105344 | 172114481 | - | 4   | 0.99092 | 2.65282  | 2.40209  | 2.12136  | 1.11368   | 1.53972   | 2.50189  | 2.14062  | 1.08963   |
| ENST00000417354.1 | ENSG00000230630.1 | DNM3OS        | intronic_lincRNA   | 568  | chr1 | 172109461 | 172113934 | - | 4   | 18.0884 | 23.3852  | 15.9566  | 8.75855  | 5.03034   | 8.41559   | 19.4189  | 11.5939  | 9.67695   |
| TCONS_00001435    | XLOC_001022       | -             | lincRNA            | 537  | chr1 | 172820381 | 172828965 | + | 2   | 0.90382 | 0.42522  | 0.42299  | 1.14485  | 1.11007   | 0.42011   | 0.357009 | 0.732719 | 0.173694  |
| TCONS_00006448    | XLOC_001033       | -             | lincRNA            | 491  | chr1 | 176197333 | 176198662 | + | 2   | 0.82765 | 1.39834  | 4.79E-05 | 0        | 2.53051   | 0.602     | 0.807311 | 1.65276  | 1.14918   |
| TCONS_00014306    | XLOC_001033       | -             | lincRNA            | 436  | chr1 | 176198113 | 176234236 | + | 2   | 1.55529 | 0.71376  | 0.61074  | 1.91166  | 1.12307   | 1.36258   | 1.32468  | 1.47603  | 0.32515   |
| TCONS_00009608    | XLOC_002388       | -             | intronic_lincRNA   | 3599 | chr1 | 178304125 | 178310743 | - | 2   | 2.1029  | 1.22563  | 4.32058  | 0.639981 | 2.83624   | 1.17885   | 2.41494  | 1.81813  | 2.85029   |
| TCONS_00017908    | XLOC_001067       | -             | lincRNA            | 404  | chr1 | 181150172 | 181151227 | + | 3   | 0.72008 | 0.68707  | 0.69621  | 0.632549 | 2.0327    | 0.697251  | 2.11291  | 0.821432 | 0.878216  |
| TCONS_00001489    | XLOC_001067       | -             | lincRNA            | 495  | chr1 | 181150215 | 181151433 | + | 2   | 3.97038 | 0.74576  | 0.73737  | 0.218145 | 0.512703  | 2.43E-05  | 0        | 0.280124 | 0.789836  |
| TCONS_00027684    | XLOC_002399       | -             | lincRNA            | 1077 | chr1 | 182047856 | 182287049 | - | 4   | 0       | 0        | 0.32494  | 0        | 0.872116  | 0.386827  | 0.333623 | 1.86865  | 2.4952    |
| TCONS_00011353    | XLOC_002399       | -             | lincRNA            | 1869 | chr1 | 182281555 | 182287049 | - | 2   | 0.85597 | 0.46614  | 0.91723  | 0.306847 | 1.05418   | 0.977293  | 0.841123 | 1.14495  | 1.84237   |
| TCONS_00010507    | XLOC_001094       | -             | lincRNA            | 633  | chr1 | 186399883 | 186404492 | + | 2   | 5.16579 | 1.64879  | 3.10917  | 0.296641 | 1.86487   | 1.46884   | 2.61829  | 1.32235  | 2.155     |
| TCONS_00004267    | XLOC_001094       | -             | lincRNA            | 1389 | chr1 | 186403897 | 186406353 | + | 2   | 1.97292 | 0.89344  | 1.52931  | 0.592512 | 0.984275  | 1.77621   | 0.64074  | 0.94985  | 2.04323   |
| TCONS_00014349    | XLOC_001106       | -             | lincRNA            | 999  | chr1 | 192578503 | 192603573 | + | 2   | 0.51015 | 0.44418  | 0.08785  | 2.80765  | 0.386353  | 1.23481   | 0.368569 | 0.304061 | 0.58048   |
| TCONS_00017927    | XLOC_001113       | -             | lincRNA            | 400  | chr1 | 193318317 | 193325066 | + | 3   | 1.01058 | 1.08619  | 1.08813  | 0.967944 | 0.945781  | 0.355692  | 1.8494   | 0.419291 | 3.25498   |
| TCONS_00030091    | XLOC_002430       | -             | lincRNA            | 612  | chr1 | 194136318 | 194258809 | - | 2   | 0.98686 | 2.60094  | 1.54946  | 2.18281  | 0.60346   | 1.02945   | 0.870239 | 2.18634  | 3.25786   |
| TCONS_00001553    | XLOC_001141       | -             | anti-sense_lincRNA | 3301 | chr1 | 201368674 | 201372976 | + | 2   | 1.31705 | 0.66042  | 0.9429   | 0.433291 | 1.64377   | 1.11087   | 0.957758 | 0.750752 | 0.520781  |
| TCONS_00001593    | XLOC_001177       | -             | lincRNA            | 1002 | chr1 | 204547761 | 204554678 | + | 2   | 0.88943 | 0.531    | 1.40027  | 0.479507 | 0.846775  | 0.790827  | 0.881207 | 1.41358  | 1.87945   |
| TCONS_00026513    | XLOC_002482       | -             | lincRNA            | 1099 | chr1 | 205409197 | 205419100 | - | 2   | 0.34015 | 0.78893  | 0.46789  | 0.142554 | 0.892072  | 1.64559   | 0.850238 | 0.809654 | 1.1599    |
| ENST00000417522.1 | ENSG00000240754.1 | RP11-38J22.6  | lincRNA            | 292  | chr1 | 206288269 | 206289577 | - | 2   | 0.36757 | 0        | 3.68208  | 2.11141  | 5.20717   | 9.16161   | 0        | 2.44684  | 6.15428   |
| TCONS_00007578    | XLOC_002498       | -             | lincRNA            | 540  | chr1 | 206289144 | 206306125 | - | 2   | 0.49471 | 1.47494  | 0.72478  | 1.69682  | 1.19167   | 3.35763   | 1.76872  | 2.51557  | 2.15949   |
| ENST00000487977.1 | ENSG00000203709.5 | C1orf132      | lincRNA            | 3197 | chr1 | 207986905 | 207996048 | - | 3   | 5.41683 | 5.67914  | 5.92399  | 7.21608  | 5.30768   | 6.99052   | 3.16772  | 4.33984  | 6.08171   |
| TCONS_00011431    | XLOC_002514       | -             | lincRNA            | 5004 | chr1 | 208990367 | 208995768 | - | 2   | 0.61652 | 0.47011  | 0.15925  | 0.239684 | 0.22996   | 0.307223  | 0.472116 | 0.634333 | 1.30782   |
| TCONS_00011435    | XLOC_002520       | -             | lincRNA            | 692  | chr1 | 210462941 | 210468569 | - | 4   | 0       | 0        | 1.29828  | 0.130457 | 0.14873   | 0.369977  | 0        | 0.165817 | 0         |
| TCONS_00018708    | XLOC_002520       | -             | lincRNA            | 841  | chr1 | 210463368 | 210468413 | - | 3   | 1.42982 | 0.12449  | 0.65474  | 6.59E-06 | 0.658047  | 0.266501  | 1.22851  | 0.380114 | 0.181203  |
| TCONS_00007589    | XLOC_002520       | -             | lincRNA            | 293  | chr1 | 210463833 | 210466546 | - | 2   | 0       | 3.04719  | 0        | 0        | 0         | 0.0001529 | 1.85512  | 0        | 0         |
| TCONS_00012489    | XLOC_001226       | -             | intronic_lincRNA   | 347  | chr1 | 210914076 | 210926824 | + | 2   | 0.68391 | 0        | 2.00095  | 0        | 0.432478  | 0.970761  | 2.13759  | 1.15736  | 0.811667  |
| TCONS_00027175    | XLOC_001231       | -             | lincRNA            | 1229 | chr1 | 211857330 | 211860075 | + | 2   | 4.35993 | 2.41056  | 2.17742  | 0.373533 | 0.599036  | 1.23185   | 1.25493  | 1.41286  | 1.23758   |
| TCONS_00007609    | XLOC_002554       | -             | intronic_lincRNA   | 2294 | chr1 | 217242963 | 217252255 | - | 2   | 3.94829 | 2.59901  | 2.3637   | 0.397339 | 1.20352   | 1.94802   | 1.97827  | 1.95805  | 2.01242   |
| TCONS_00021243    | XLOC_001253       | -             | lincRNA            | 2192 | chr1 | 219564186 | 219607322 | + | 2   | 1.33218 | 1.49043  | 1.08512  | 0.642613 | 0.4012    | 0.918024  | 0.292983 | 0.847733 | 0.347795  |
| TCONS_00024299    | XLOC_001263       | -             | lincRNA            | 318  | chr1 | 221232546 | 221240403 | + | 2   | 0.84626 | 0        | 0        | 1.09473  | 0         | 0         | 0.539895 | 5.09457  | 2.53878   |
| TCONS_00006626    | XLOC_001264       | -             | lincRNA            | 445  | chr1 | 221250954 | 221251527 | + | 2   | 0.82677 | 0        | 0.29378  | 0.262991 | 0.256086  | 0         | 0        | 0.339465 | 0.961554  |
| TCONS_00024905    | XLOC_002570       | -             | lincRNA            | 1296 | chr1 | 222086436 | 222089552 | - | 3   | 0.09304 | 0.19393  | 0.19155  | 0.292216 | 0.168668  | 0.0642427 | 0.74923  | 1.3994   | 0.791961  |
| TCONS_00018025    | XLOC_001281       | -             | intronic_lincRNA   | 382  | chr1 | 225463616 | 225465325 | + | 2   | 0.55456 | 0        | 0        | 0.3548   | 1.38924   | 0         | 1.02189  | 0        | 0.32597   |
| TCONS_00008723    | XLOC_001294       | -             | anti-sense_lincRNA | 738  | chr1 | 226320758 | 226342534 | + | 3   | 1.70247 | 1.58846  | 1.44291  | 0.238543 | 0.806093  | 1.04958   | 2.64706  | 1.05973  | 1.83817   |
| TCONS_00010661    | XLOC_001304       | -             | lincRNA            | 394  | chr1 | 227976233 | 227976831 | + | 2   | 3.64502 | 1.12061  | 1.87202  | 0.665404 | 0.975811  | 0.733628  | 0.318332 | 1.29852  | 0.915891  |
| TCONS_00009742    | XLOC_002607       | -             | lincRNA            | 328  | chr1 | 228392031 | 228393248 | - | 2   | 1.56489 | 2.2856   | 0.57792  | 1.00989  | 1.49482   | 1.67312   | 1.48597  | 0        | 1.86997   |
| TCONS_00001739    | XLOC_001314       | -             | anti-sense_lincRNA | 270  | chr1 | 228696460 | 228697785 | + | 2   | 1.36721 | 0        | 0        | 0.898394 | 0         | 0.995779  | 0.918523 | 0        | 0.844108  |
| TCONS_00010675    | XLOC_001316       | -             | lincRNA            | 1164 | chr1 | 228945698 | 229048261 | + | 3   | 1.05756 | 0.58835  | 1.67151  | 0        | 0.0639666 | 0.146126  | 0.42656  | 0.419182 | 0.420481  |
| ENST00000436334.1 | ENSG00000177788.5 | RP5-1061H20.4 | lincRNA            | 315  | chr1 | 229405113 | 229406775 | - | 2   | 0.86741 | 3.18347  | 1.93735  | 0.561452 | 2.22226   | 6.82516   | 2.21908  | 1.49495  | 0         |
| ENST00000416221.1 | ENSG00000233461.1 | RP11-295G20.2 | lincRNA            | 465  | chr1 | 231658134 | 231664302 | - | 3   | 2.29472 | 2.17241  | 0.81264  | 1.70107  | 2.12719   | 2.9444    | 1.37553  | 1.87772  | 2.21873   |
| TCONS_00017288    | XLOC_002636       | -             | lincRNA            | 922  | chr1 | 233546446 | 233621345 | - | 5   | 0       | 9.83E-06 | 0.09733  | 1.02344  | 0.216422  | 0.994211  | 0        | 9.13E-06 | 0.0803516 |
| TCONS_00015160    | XLOC_002636       | -             | lincRNA            | 1267 | chr1 | 233546450 | 233621314 | - | 4</ |         |          |          |          |           |           |          |          |           |



|                   |                   |               |                    |      |       |           |           |   |   |         |         |          |           |           |           |          |           |           |
|-------------------|-------------------|---------------|--------------------|------|-------|-----------|-----------|---|---|---------|---------|----------|-----------|-----------|-----------|----------|-----------|-----------|
| TCONS_00004483    | XLOC_001336       | -             | lincRNA            | 588  | chr1  | 234492782 | 234501727 | + | 2 | 1.83324 | 0.92137 | 1.09834  | 0.662426  | 0.481005  | 0.729041  | 2.00586  | 1.69083   | 1.80641   |
| TCONS_00001771    | XLOC_001339       | -             | lincRNA            | 1501 | chr1  | 234887340 | 234911775 | + | 3 | 2.11698 | 1.1971  | 1.07443  | 0.0984418 | 0.425923  | 0.324598  | 0.54006  | 0.123927  | 0.266655  |
| TCONS_00015167    | XLOC_002647       | -             | lincRNA            | 1999 | chr1  | 235095404 | 235098902 | - | 2 | 0.68074 | 0.55027 | 0.50411  | 2.06372   | 0.820389  | 0.469225  | 0.454477 | 0.447215  | 0.321019  |
| TCONS_00003231    | XLOC_002660       | -             | lincRNA            | 370  | chr1  | 240078016 | 240080394 | - | 3 | 3.55842 | 0.42766 | 0.85947  | 0         | 0.745029  | 0.419184  | 0.732461 | 0.496953  | 0         |
| TCONS_00014481    | XLOC_001355       | -             | lincRNA            | 528  | chr1  | 241587980 | 241596964 | + | 2 | 0.61897 | 0.87417 | 0        | 1.96074   | 0         | 0.215864  | 0.367173 | 0         | 0.17854   |
| TCONS_00003245    | XLOC_002667       | -             | lincRNA            | 776  | chr1  | 243255812 | 243260949 | - | 3 | 2.82768 | 8.40178 | 3.05965  | 10.024    | 3.86941   | 6.86015   | 1.74866  | 2.68352   | 5.55086   |
| TCONS_00018078    | XLOC_001363       | -             | intronic_lincRNA   | 2376 | chr1  | 243637243 | 243641137 | + | 2 | 2.25165 | 1.62391 | 1.95395  | 1.41175   | 2.37259   | 2.84411   | 0.777405 | 1.21903   | 1.48545   |
| TCONS_00005663    | XLOC_002671       | -             | lincRNA            | 1054 | chr1  | 244394746 | 244488466 | - | 3 | 4.36072 | 0.27749 | 0.2969   | 0         | 0.91499   | 1.2035    | 0.785268 | 0.7668    | 0.571313  |
| TCONS_00020658    | XLOC_002671       | -             | lincRNA            | 808  | chr1  | 244394861 | 244488487 | - | 2 | 0       | 1.12656 | 1.48E-05 | 0.94947   | 0.91219   | 0.0007167 | 0        | 0         | 1.7533    |
| TCONS_00005665    | XLOC_002671       | -             | lincRNA            | 1101 | chr1  | 244421727 | 244488953 | - | 3 | 0.84406 | 0.8683  | 0.18557  | 0.0711209 | 0.0941251 | 0.891833  | 0.561366 | 1.42785   | 0.722271  |
| TCONS_00006704    | XLOC_001366       | -             | lincRNA            | 1686 | chr1  | 244499875 | 244504230 | + | 2 | 0.58731 | 1.12859 | 1.03698  | 0.162366  | 0.277597  | 0.50563   | 0.255867 | 0.0769802 | 0.0388889 |
| TCONS_00008758    | XLOC_001366       | -             | lincRNA            | 329  | chr1  | 244499986 | 244506361 | + | 2 | 0       | 1.69569 | 3.43953  | 0.501052  | 0         | 3.4686    | 0.982497 | 0         | 0         |
| TCONS_00008759    | XLOC_001366       | -             | lincRNA            | 621  | chr1  | 244500020 | 244506479 | + | 2 | 0.59065 | 2.25726 | 6.725    | 2.0187    | 1.07693   | 2.86312   | 3.90064  | 0.112706  | 0         |
| TCONS_00027805    | XLOC_002680       | -             | intronic_lincRNA   | 1030 | chr1  | 246438977 | 246440089 | - | 2 | 8.96335 | 5.3007  | 6.50902  | 4.47851   | 9.44433   | 6.4521    | 4.53889  | 6.33913   | 5.02788   |
| TCONS_00021936    | XLOC_002681       | -             | intronic_lincRNA   | 847  | chr1  | 246600293 | 246603844 | - | 3 | 2.361   | 0.32965 | 1.63145  | 0.892075  | 1.83958   | 2.11201   | 0.681522 | 0.878587  | 0.732351  |
| TCONS_00018789    | XLOC_002681       | -             | intronic_lincRNA   | 2334 | chr1  | 246600478 | 246603001 | - | 2 | 1.48278 | 0.62926 | 1.73128  | 0.779759  | 1.28904   | 1.60249   | 0.397497 | 1.09244   | 1.07766   |
| ENST00000419361.1 | ENSG00000227953.2 | RP11-439E19.3 | lincRNA            | 552  | chr1  | 246953926 | 246955687 | + | 2 | 1.73108 | 1.42388 | 0.80902  | 0.730536  | 1.77      | 0.201038  | 0.341264 | 0         | 0.166175  |
| TCONS_00036347    | XLOC_003284       | -             | lincRNA            | 412  | chr10 | 309039    | 309605    | - | 2 | 0.95404 | 0.68219 | 0.68274  | 0         | 1.48486   | 0.335348  | 0        | 0         | 0.27875   |
| TCONS_00035060    | XLOC_002717       | -             | lincRNA            | 787  | chr10 | 4915235   | 4975806   | + | 4 | 1.54546 | 1.69656 | 1.03944  | 0.711013  | 1.11194   | 0.360591  | 0.605365 | 0.583071  | 0.139268  |
| TCONS_00036711    | XLOC_002717       | -             | lincRNA            | 647  | chr10 | 4931657   | 4975472   | + | 4 | 0.2477  | 0.47962 | 0.68786  | 1.36385   | 0.202142  | 0.158063  | 0        | 0.510482  | 0.599063  |
| TCONS_00035061    | XLOC_002717       | -             | lincRNA            | 332  | chr10 | 4991816   | 4995082   | + | 2 | 0       | 0.55382 | 0.5597   | 0         | 0         | 0         | 0.479396 | 3.23813   | 0.453055  |
| TCONS_00034268    | XLOC_002733       | -             | lincRNA            | 1694 | chr10 | 6629028   | 6657792   | + | 5 | 1.29755 | 1.23132 | 1.21526  | 1.07136   | 0.906134  | 0.659382  | 0.508869 | 0.700813  | 1.43116   |
| TCONS_00031932    | XLOC_002733       | -             | lincRNA            | 437  | chr10 | 6660693   | 6663270   | + | 2 | 0.42721 | 0.30434 | 1.21625  | 0.543867  | 0.264931  | 0         | 0.257724 | 0         | 1.49213   |
| TCONS_00038086    | XLOC_003324       | -             | lincRNA            | 1557 | chr10 | 6976337   | 7198205   | - | 4 | 0.2276  | 0.31295 | 0.31566  | 1.41561   | 0.589727  | 0.518623  | 0.262041 | 0.177719  | 0.643506  |
| TCONS_00044834    | XLOC_003324       | -             | lincRNA            | 1103 | chr10 | 6976379   | 7077205   | - | 3 | 0.10978 | 0       | 0.53329  | 0         | 0         | 7.90E-06  | 0.450852 | 1.88141   | 1.08381   |
| TCONS_00040842    | XLOC_002751       | -             | lincRNA            | 347  | chr10 | 13425135  | 13442192  | + | 2 | 0       | 0.49626 | 1.50072  | 0         | 0.864956  | 2.4269    | 1.28255  | 1.73605   | 1.62333   |
| TCONS_00038408    | XLOC_002754       | -             | anti-sense_lincRNA | 9178 | chr10 | 13682621  | 13692193  | + | 2 | 5.38174 | 4.07769 | 4.73679  | 2.21549   | 3.7714    | 3.42003   | 2.81443  | 3.65888   | 3.59334   |
| TCONS_00033207    | XLOC_002755       | -             | anti-sense_lincRNA | 2030 | chr10 | 13709066  | 13712528  | + | 4 | 1.31057 | 0.90303 | 1.03371  | 0.205251  | 0.998337  | 1.55469   | 0.701956 | 0.424714  | 0.973898  |
| TCONS_00036044    | XLOC_002755       | -             | intronic_lincRNA   | 1092 | chr10 | 13709595  | 13711890  | + | 2 | 0.97127 | 0.84509 | 0.85524  | 0.656018  | 1.19578   | 0.0437667 | 0        | 1.02813   | 1.5677    |
| TCONS_00035544    | XLOC_003349       | -             | anti-sense_lincRNA | 435  | chr10 | 14909735  | 14920720  | - | 2 | 0.43081 | 1.53495 | 0.92023  | 0.548529  | 1.87067   | 0.3022    | 1.04012  | 0.354473  | 0.250853  |
| ENST00000449529.1 | ENSG00000152487.6 | ARL5B-AS1     | lincRNA            | 689  | chr10 | 18943480  | 18948185  | - | 2 | 7.69732 | 3.64463 | 5.34864  | 2.49412   | 2.9171    | 2.74387   | 2.55413  | 3.33708   | 1.54812   |
| TCONS_00034706    | XLOC_003366       | -             | intronic_lincRNA   | 297  | chr10 | 20011331  | 20017609  | - | 2 | 2.03793 | 6.03297 | 0        | 3.3143    | 3.29456   | 0.733256  | 0.662772 | 4.45011   | 1.23576   |
| TCONS_00038124    | XLOC_003367       | -             | intronic_lincRNA   | 2205 | chr10 | 21234047  | 21249586  | - | 3 | 3.19956 | 1.67615 | 2.37184  | 1.83212   | 4.1911    | 3.2818    | 3.69546  | 4.08092   | 4.54629   |
| TCONS_00032642    | XLOC_003367       | -             | intronic_lincRNA   | 1009 | chr10 | 21234256  | 21249556  | - | 4 | 6.94706 | 3.19837 | 6.22867  | 1.87022   | 4.29705   | 3.00053   | 7.20918  | 7.73153   | 5.23945   |
| TCONS_00039635    | XLOC_003373       | -             | lincRNA            | 2897 | chr10 | 23492863  | 23542555  | - | 6 | 2.27128 | 1.15242 | 2.34998  | 0.28471   | 1.54886   | 0.782099  | 0.950633 | 0.92316   | 0.898428  |
| TCONS_00034305    | XLOC_002790       | -             | lincRNA            | 514  | chr10 | 23788457  | 23819067  | + | 2 | 0.64638 | 2.513   | 0.9097   | 0         | 0.994049  | 1.12784   | 1.34465  | 0.525335  | 0         |
| TCONS_00034313    | XLOC_002815       | -             | lincRNA            | 710  | chr10 | 30397692  | 30400146  | + | 2 | 1.39654 | 2.3752  | 0.55401  | 0.251688  | 0.243099  | 0.553749  | 0.465984 | 0.159856  | 0.228258  |
| ENST00000433770.1 | ENSG00000237797.1 | RP11-472N13.3 | lincRNA            | 347  | chr10 | 31982012  | 31996316  | - | 2 | 0       | 0.49626 | 1.50072  | 0.439754  | 0         | 0         | 0.427518 | 1.73605   | 0.405833  |
| TCONS_00037820    | XLOC_002828       | -             | intronic_lincRNA   | 439  | chr10 | 32923016  | 32924146  | + | 2 | 0.84733 | 1.20697 | 0.90428  | 2.69641   | 0.525327  | 1.18837   | 2.81005  | 3.13483   | 2.4656    |
| TCONS_00036846    | XLOC_002829       | -             | intronic_lincRNA   | 1728 | chr10 | 34921922  | 34924167  | + | 3 | 1.53582 | 0.60191 | 2.5589   | 0.167599  | 0.442966  | 0.322342  | 1.79851  | 0.527018  | 0.756321  |
| TCONS_00036088    | XLOC_002844       | -             | lincRNA            | 557  | chr10 | 38692108  | 38697019  | + | 2 | 1.70698 | 0.60156 | 0.7974   | 0.180063  | 1.22137   | 0.396404  | 0        | 0.230194  | 0.491433  |
| TCONS_00037388    | XLOC_003418       | -             | lincRNA            | 788  | chr10 | 42383107  | 42385731  | - | 2 | 130.646 | 165.489 | 25.9945  | 16.1464   | 10.5116   | 3.95972   | 55.0828  | 159.254   | 52.2645   |
| TCONS_00035646    | XLOC_003418       | -             | lincRNA            | 912  | chr10 | 42383461  | 42389980  | - | 2 | 12.3636 | 5.83116 | 3.16974  | 1.08056   | 0.533352  | 0.0990175 | 2.99217  | 9.74571   | 2.7912    |
| TCONS_00037389    | XLOC_003418       | -             | lincRNA            | 566  | chr10 | 42387085  | 42394591  | - | 2 | 187.064 | 161.691 | 38.0885  | 17.3856   | 10.8879   | 5.21893   | 51.7877  | 176.817   | 58.6177   |
| TCONS_00032728    | XLOC_003418       | -             | lincRNA            | 2076 | chr10 | 42390288  | 42597886  | - | 2 | 51.8997 | 79.6704 | 11.1907  | 4.36728   | 6.91565   | 1.68727   | 25.582   | 36.2738   | 12.5584   |
| TCONS_00044425    | XLOC_003418       | -             | lincRNA            | 537  | chr10 | 42392974  | 42396759  | - | 2 | 14.7624 | 9.99277 | 2.11495  | 0.572425  | 1.4801    | 0.210055  | 4.98813  | 9.2811    | 1.91063   |
| ENST00000442526.2 | ENSG00000230555.2 | RP11-517P14.2 | lincRNA            | 760  | chr10 | 43916186  | 43917548  | + | 2 | 0.9088  | 0.38136 | 2.39283  | 1.71855   | 0.995273  | 1.00815   | 1.27039  | 1.30807   | 0.934534  |
| TCONS_00042624    | XLOC_003437       | -             | intronic_lincRNA   | 1275 | chr10 | 46081346  | 46082698  | - | 2 | 5.97603 | 1.97733 | 3.71119  | 1.19174   | 3.26762   | 1.70302   | 1.85551  | 2.32823   | 3.01471   |
| TCONS_00033335    | XLOC_002888       | -             | lincRNA            | 652  | chr10 | 48185738  | 48187765  | + | 2 | 0.89994 | 0.63146 | 0.93975  | 0.568239  | 1.37345   | 0.312608  | 0.791123 | 0.903998  | 1.28956   |
| TCONS_00042629    | XLOC_003459       | -             | lincRNA            | 397  | chr10 | 49294700  | 49313272  | - | 3 | 4.10311 | 4.41254 | 2.57925  | 0.655196  | 0.320188  | 1.0835    | 1.25281  | 0         | 1.20212   |
| TCONS_00033357    | XLOC_002907       | -             | lincRNA            | 675  | chr10 | 52391425  | 52402660  | + | 2 | 1.85738 | 0.60053 | 0.5956   | 0.135154  | 0.391842  | 0.546137  | 1.12161  | 0.65411   | 0.735826  |
| TCONS_00037845    | XLOC_002907       | -             | lincRNA            | 4771 | chr10 | 52391449  | 52396871  | + | 2 | 4.11011 | 1.5904  | 3.42368  | 2.687     | 5.15618   | 3.7517    | 2.78661  | 4.22849   | 2.86262   |
| TCONS_00036890    | XLOC_002907       | -             | lincRNA            | 825  | chr10 | 52402103  | 52407702  | + | 2 | 0.86778 | 0.11378 | 1.46451  | 0.307857  | 0.197959  | 0.262634  | 0.477819 | 0.155238  | 0.185883  |
| TCONS_00035229    | XLOC_002916       | -             | intronic_lincRNA   | 1390 | chr10 | 60347210  | 60350136  | + | 3 | 3.34258 | 2.97561 | 2.70341  | 1.23785   | 1.0352    | 1.83387   | 1.28039  | 0.67789   | 1.11797   |
| TCONS_00044675    | XLOC_002917       | -             | intronic_lincRNA   | 2426 | chr10 | 60361288  | 60363772  | + | 2 | 3.11825 | 3.20643 | 3.22489  | 2.18501   | 1.32523   | 1.89556   | 1.10047  | 1.73313   | 1.60757   |
| TCONS_00032101    | XLOC_002928       | -             | lincRNA            | 786  | chr10 | 65390659  | 65394378  | + | 2 | 3.30078 | 1.3357  | 1.32292  | 2.62729   | 0.633789  | 0.602014  | 0.60642  | 1.2491    | 0.892674  |
| TCONS_00034366    | XLOC_002929       | -             | lincRNA            | 1410 | chr10 | 67330047  | 67345904  | + | 4 | 3.9594  | 2.35171 | 1.6068   | 0.381234  | 1.95755   | 0.250661  | 1.21076  | 0.967958  | 0.595287  |
| TCONS_00042347    | XLOC_002929       | -             | lincRNA            | 1655 | chr10 | 67330102  | 67376037  | + | 5 | 3.44695 | 3.24624 | 1.78819  | 1.75453   | 1.775     | 1.87285   | 2.11979  | 1.57076   | 1.39852   |
| TCONS_00032102    | XLOC_002929       | -             | lincRNA            | 1247 | chr10 | 67330285  | 67333551  | + | 3 | 0.86269 | 0.4872  | 0.83667  | 0.139862  | 0.552363  | 0.984034  | 0.426264 | 0.553999  | 0.0999198 |
| TCONS_00032105    | XLOC_002929       | -             | lincRNA            | 2363 | chr10 | 67344653  | 67376848  | + | 2 | 3.68147 | 1.4006  |          |           |           |           |          |           |           |

|                   |                   |               |                    |      |       |           |           |   |   |         |         |         |          |          |           |           |          |           |
|-------------------|-------------------|---------------|--------------------|------|-------|-----------|-----------|---|---|---------|---------|---------|----------|----------|-----------|-----------|----------|-----------|
| TCONS_00040929    | XLOC_002979       | -             | intronic_lincRNA   | 2541 | chr10 | 74548364  | 74551455  | + | 2 | 3.31406 | 1.69029 | 2.14314 | 1.94091  | 3.72743  | 3.99517   | 1.34502   | 2.12821  | 2.21867   |
| TCONS_00036544    | XLOC_003548       | -             | lincRNA            | 701  | chr10 | 75381375  | 75385597  | - | 2 | 3.45226 | 0.85353 | 1.97447 | 0.38434  | 0.866306 | 1.1275    | 1.06776   | 0.325563 | 0.581011  |
| TCONS_00032185    | XLOC_002998       | -             | lincRNA            | 470  | chr10 | 77043766  | 77045628  | + | 2 | 0       | 1.33212 | 0.2657  | 0        | 0.927546 | 0.525341  | 1.57373   | 0.613918 | 0         |
| ENST00000449852.1 | ENSG00000233871.1 | DLG5-AS1      | lincRNA            | 487  | chr10 | 79687130  | 79689582  | + | 2 | 4.24036 | 1.5021  | 1.2474  | 1.12132  | 1.96094  | 1.72883   | 2.95311   | 2.01731  | 2.04539   |
| TCONS_00037891    | XLOC_003006       | -             | lincRNA            | 323  | chr10 | 80113911  | 80115763  | + | 2 | 0       | 0       | 0       | 2.10133  | 1.03783  | 0.580342  | 1.03341   | 1.39418  | 0.486829  |
| ENST00000601369.1 | ENSG00000226381.3 | RP11-119F19.2 | lincRNA            | 616  | chr10 | 81451256  | 81526085  | - | 2 | 3.66532 | 4.97949 | 2.3866  | 2.62496  | 3.43607  | 4.75763   | 5.31334   | 1.37762  | 3.08585   |
| TCONS_00032873    | XLOC_003573       | -             | lincRNA            | 4185 | chr10 | 81555029  | 81575597  | - | 5 | 2.30635 | 1.36402 | 2.4617  | 2.00671  | 2.64964  | 3.10435   | 1.50391   | 1.50988  | 2.63311   |
| TCONS_00036975    | XLOC_003013       | -             | lincRNA            | 2407 | chr10 | 81586793  | 81590076  | + | 2 | 7.90892 | 4.00261 | 6.53711 | 2.52282  | 4.59481  | 3.56887   | 4.96855   | 3.89683  | 3.89671   |
| TCONS_00039776    | XLOC_003589       | -             | lincRNA            | 487  | chr10 | 89260190  | 89264192  | - | 2 | 0.35336 | 0.75105 | 0.99792 | 0.224265 | 0.653647 | 0.246976  | 0.210936  | 0.576374 | 1.63632   |
| TCONS_00037911    | XLOC_003048       | -             | lincRNA            | 503  | chr10 | 89802095  | 89819924  | + | 3 | 0.33484 | 0.47379 | 0.47185 | 3.39761  | 0        | 0         | 0.598045  | 0.544999 | 0.967708  |
| TCONS_00032236    | XLOC_003060       | -             | lincRNA            | 7128 | chr10 | 90939114  | 90948660  | + | 2 | 2.18205 | 1.65991 | 1.40462 | 0.987853 | 1.84196  | 0.963566  | 0.780059  | 0.798214 | 0.399211  |
| TCONS_00037920    | XLOC_003067       | -             | lincRNA            | 4559 | chr10 | 91647808  | 91678714  | + | 2 | 0.48757 | 0.6892  | 0.6506  | 0.869085 | 0.880021 | 0.280387  | 0.541643  | 1.03851  | 1.22033   |
| TCONS_00034454    | XLOC_003067       | -             | lincRNA            | 1395 | chr10 | 91648715  | 91675595  | + | 2 | 0.27218 | 0.91485 | 0.77427 | 1.00653  | 0.541452 | 0.625062  | 1.04998   | 1.72548  | 0.615875  |
| TCONS_00034455    | XLOC_003068       | -             | lincRNA            | 546  | chr10 | 91825510  | 91826869  | + | 2 | 0.58697 | 0.41399 | 0.61756 | 0.371637 | 0.720481 | 0         | 0.347392  | 1.9017   | 1.01462   |
| TCONS_00036573    | XLOC_003605       | -             | lincRNA            | 1500 | chr10 | 92911775  | 92914017  | - | 2 | 3.76641 | 2.23267 | 2.6344  | 1.77332  | 1.4682   | 1.67838   | 1.17104   | 1.86035  | 1.60116   |
| TCONS_00032926    | XLOC_003620       | -             | anti-sense_lincRNA | 1809 | chr10 | 96984619  | 96988928  | - | 3 | 2.1562  | 0.65943 | 0.65073 | 1.79045  | 0.841141 | 1.39926   | 1.05342   | 0.850566 | 0.825832  |
| TCONS_00037990    | XLOC_003163       | -             | lincRNA            | 361  | chr10 | 109449333 | 109462662 | + | 4 | 0       | 0.90433 | 2.27434 | 2.0069   | 2.75744  | 1.32855   | 1.16415   | 1.57826  | 1.10905   |
| TCONS_00039240    | XLOC_003706       | -             | intronic_lincRNA   | 1125 | chr10 | 111672593 | 111674179 | - | 2 | 1.32245 | 0.45998 | 0.90935 | 0.900501 | 0.600122 | 1.67535   | 0.635403  | 1.48592  | 1.62803   |
| TCONS_00033056    | XLOC_003720       | -             | lincRNA            | 4085 | chr10 | 115241616 | 115252075 | - | 2 | 1.86141 | 1.02923 | 1.64597 | 2.68073  | 1.40254  | 2.38313   | 2.05228   | 0.937566 | 0.783471  |
| TCONS_00042758    | XLOC_003720       | -             | lincRNA            | 3914 | chr10 | 115246723 | 115252132 | - | 2 | 1.21485 | 0.5771  | 0.88235 | 0.675374 | 0.632178 | 2.16293   | 3.05532   | 1.07158  | 0.205045  |
| TCONS_00037677    | XLOC_003728       | -             | lincRNA            | 1582 | chr10 | 115717190 | 115720554 | - | 2 | 1.25491 | 0.56333 | 1.16272 | 0.370657 | 0.534475 | 0.305537  | 0.42344   | 0.466458 | 0.209136  |
| TCONS_00040748    | XLOC_003736       | -             | lincRNA            | 1644 | chr10 | 118591885 | 118595264 | - | 3 | 7.34797 | 3.3323  | 6.7233  | 1.33021  | 3.49481  | 4.58085   | 2.87625   | 2.84516  | 0.48248   |
| TCONS_00035004    | XLOC_003755       | -             | lincRNA            | 1050 | chr10 | 122952485 | 123003281 | - | 2 | 0.95923 | 0.75124 | 1.89803 | 0        | 0.290413 | 0.0828924 | 0.0692275 | 0        | 0.0681778 |
| TCONS_00038320    | XLOC_003763       | -             | lincRNA            | 623  | chr10 | 125471687 | 125472853 | - | 2 | 0.48066 | 0.33766 | 0       | 2.27764  | 0.293777 | 0.668345  | 0.423474  | 0.580421 | 0.275828  |
| TCONS_00038327    | XLOC_003777       | -             | lincRNA            | 349  | chr10 | 127473742 | 127474478 | - | 2 | 1.34987 | 0.48946 | 0       | 1.30151  | 0.426524 | 0.957641  | 0.42141   | 0        | 1.20076   |
| TCONS_00032490    | XLOC_003247       | -             | lincRNA            | 239  | chr10 | 128112956 | 128113529 | + | 2 | 4.29612 | 0       | 1.73088 | 1.43625  | 1.45938  | 0         | 0         | 0        | 0         |
| TCONS_00034643    | XLOC_003270       | -             | intronic_lincRNA   | 462  | chr10 | 134222676 | 134223674 | + | 2 | 0.77359 | 1.09889 | 1.37043 | 1.22906  | 1.43471  | 0.541534  | 1.85601   | 0.633328 | 0.6734    |
| TCONS_00036698    | XLOC_003803       | -             | intronic_lincRNA   | 564  | chr10 | 134665303 | 134666070 | - | 2 | 1.30044 | 0.78642 | 1.44801 | 0.214555 | 0.369015 | 1.03908   | 1.77844   | 2.06634  | 0.802573  |
| TCONS_00035041    | XLOC_003803       | -             | intronic_lincRNA   | 508  | chr10 | 134665359 | 134665968 | - | 2 | 10.6541 | 2.56281 | 2.68878 | 0.790611 | 1.9957   | 1.30039   | 2.78483   | 1.56553  | 2.47504   |
| TCONS_00038336    | XLOC_003802       | -             | lincRNA            | 586  | chr10 | 134679484 | 134681272 | - | 2 | 3.42214 | 1.85241 | 2.0243  | 1.49822  | 0.967069 | 0.183211  | 2.17171   | 0.212476 | 1.36193   |
| ENST00000534742.1 | ENSG00000255026.1 | RP11-326C3.2  | lincRNA            | 812  | chr11 | 288038    | 288987    | + | 2 | 1.33096 | 3.25423 | 1.84131 | 0.838444 | 0.505509 | 0.691595  | 1.25697   | 2.52323  | 0.75947   |
| ENST00000602429.1 | ENSG00000251661.3 | RP11-326C3.11 | anti-sense_lincRNA | 1151 | chr11 | 318653    | 325631    | + | 2 | 1.92957 | 2.60941 | 2.79973 | 0.538974 | 2.13993  | 0.962842  | 3.08904   | 1.4449   | 1.03521   |
| TCONS_00057978    | XLOC_003859       | -             | lincRNA            | 479  | chr11 | 2356875   | 2363383   | + | 3 | 0       | 1.03066 | 0.25686 | 0        | 0.224256 | 0.979746  | 1.08625   | 0        | 0.791376  |
| TCONS_00045857    | XLOC_003859       | -             | lincRNA            | 738  | chr11 | 2356926   | 2358067   | + | 2 | 1.70247 | 0.52949 | 0.39352 | 0.238543 | 0.690937 | 0.150165  | 0.330882  | 0.605558 | 0.242298  |
| TCONS_00045862    | XLOC_003865       | -             | lincRNA            | 589  | chr11 | 3302131   | 3372370   | + | 2 | 1.04489 | 0.18379 | 0.18258 | 0.165179 | 0.799584 | 0.363577  | 0         | 0        | 0.300284  |
| TCONS_00047494    | XLOC_003867       | -             | lincRNA            | 512  | chr11 | 3533478   | 3542144   | + | 3 | 2.60198 | 1.60961 | 1.14462 | 0        | 2.40129  | 0.681075  | 1.54698   | 0        | 1.12716   |
| ENST00000415809.1 | ENSG00000228661.1 | AC090587.5    | lincRNA            | 494  | chr11 | 3875548   | 3876739   | - | 2 | 0.69003 | 0.48856 | 0.97345 | 0.218892 | 0        | 0.48209   | 0.41141   | 0.281107 | 0.199578  |
| TCONS_00058641    | XLOC_003881       | -             | lincRNA            | 713  | chr11 | 6344799   | 6351716   | + | 2 | 2.38012 | 1.25003 | 2.47819 | 0.750633 | 0.845815 | 0.963365  | 1.50538   | 2.22465  | 0.226909  |
| TCONS_00048097    | XLOC_004599       | -             | lincRNA            | 1488 | chr11 | 6754007   | 6767693   | - | 2 | 2.29671 | 1.26382 | 5.75236 | 4.17635  | 2.29462  | 3.44275   | 3.45523   | 5.57083  | 8.79902   |
| TCONS_00053249    | XLOC_004602       | -             | intronic_lincRNA   | 4335 | chr11 | 7458677   | 7471664   | - | 2 | 2.42031 | 1.60468 | 1.74972 | 1.43881  | 2.12288  | 2.56671   | 0.900468  | 1.95938  | 1.97978   |
| TCONS_00056785    | XLOC_004621       | -             | lincRNA            | 505  | chr11 | 9142160   | 9143107   | - | 2 | 0.33266 | 0.23532 | 0       | 0.632849 | 0.409571 | 0.464558  | 0.593966  | 0.541315 | 1.92249   |
| TCONS_00050750    | XLOC_003916       | -             | intronic_lincRNA   | 1942 | chr11 | 12217262  | 12220489  | + | 2 | 1.34738 | 1.29904 | 2.96391 | 2.57228  | 1.55342  | 1.17112   | 0.71242   | 2.21725  | 2.18827   |
| TCONS_00047584    | XLOC_003947       | -             | anti-sense_lincRNA | 3909 | chr11 | 19217909  | 19316459  | + | 5 | 18.6961 | 12.6969 | 11.4321 | 1.99666  | 3.04041  | 4.43941   | 7.67599   | 2.72033  | 5.69152   |
| TCONS_00047580    | XLOC_003947       | -             | anti-sense_lincRNA | 921  | chr11 | 19218163  | 19274537  | + | 3 | 7.47878 | 7.6802  | 3.47479 | 0.555237 | 0.884631 | 2.02926   | 4.40276   | 1.71552  | 2.64671   |
| TCONS_00053726    | XLOC_003947       | -             | lincRNA            | 4699 | chr11 | 19330376  | 19335385  | + | 2 | 9.46582 | 7.27932 | 5.41113 | 1.15173  | 1.75991  | 2.46828   | 2.89597   | 1.05179  | 3.25443   |
| TCONS_00048685    | XLOC_003947       | -             | lincRNA            | 3649 | chr11 | 19349530  | 19353695  | + | 2 | 6.2469  | 3.45973 | 1.99773 | 0.296799 | 0.854539 | 1.1006    | 1.56966   | 0.930754 | 1.65524   |
| TCONS_00050782    | XLOC_003959       | -             | lincRNA            | 502  | chr11 | 22856486  | 22860151  | + | 2 | 1.00782 | 0.71308 | 1.89382 | 1.06529  | 0.413716 | 0.234606  | 0.600106  | 1.36715  | 1.16517   |
| TCONS_00051288    | XLOC_004677       | -             | lincRNA            | 4229 | chr11 | 27168785  | 27255720  | - | 3 | 0.83588 | 0.45809 | 0.36933 | 0.439821 | 1.42873  | 3.39548   | 0.694146  | 0.981198 | 1.16753   |
| TCONS_00056024    | XLOC_004677       | -             | lincRNA            | 1910 | chr11 | 27171141  | 27241420  | - | 3 | 0.33266 | 0.49027 | 0.56513 | 0.546987 | 1.51891  | 1.86335   | 0.548534  | 1.4579   | 1.45224   |
| TCONS_00056827    | XLOC_004677       | -             | lincRNA            | 2836 | chr11 | 27237200  | 27241213  | - | 2 | 0.94685 | 0.50918 | 0.57504 | 0.720707 | 1.37503  | 2.21593   | 0.97001   | 1.88138  | 1.43174   |
| TCONS_00050788    | XLOC_003969       | -             | lincRNA            | 1029 | chr11 | 27532396  | 27535272  | + | 2 | 3.07333 | 1.28398 | 2.62371 | 0.309236 | 1.78692  | 1.86997   | 1.56215   | 1.95288  | 0.908915  |
| TCONS_00050791    | XLOC_003970       | -             | intronic_lincRNA   | 5774 | chr11 | 28246675  | 28255093  | + | 3 | 6.81638 | 3.0334  | 6.01246 | 3.13775  | 5.13015  | 4.66488   | 3.82768   | 4.86149  | 3.93923   |
| TCONS_00047606    | XLOC_003970       | -             | intronic_lincRNA   | 831  | chr11 | 28251844  | 28255171  | + | 2 | 6.77787 | 1.95949 | 5.02056 | 4.32723  | 4.01923  | 2.79452   | 2.9991    | 2.7036   | 3.31379   |
| TCONS_00045980    | XLOC_003970       | -             | lincRNA            | 1331 | chr11 | 28433497  | 28447147  | + | 2 | 2.25424 | 1.12737 | 0.80418 | 0.736211 | 0.980531 | 1.05825   | 0.466582  | 1.49845  | 0.818488  |
| TCONS_00054728    | XLOC_003971       | -             | lincRNA            | 1810 | chr11 | 28547519  | 28549423  | + | 2 | 1.58446 | 0.61509 | 0.56361 | 0.437394 | 0.611357 | 0.655496  | 0.508231  | 0.800032 | 0.825318  |
| TCONS_00049749    | XLOC_003979       | -             | lincRNA            | 1775 | chr11 | 30795298  | 30815442  | + | 3 | 2.20269 | 1.572   | 1.01944 | 2.19498  | 0.859364 | 0.625414  | 0.445382  | 0.715677 | 0.0366836 |
| TCONS_00048192    | XLOC_004688       | -             | lincRNA            | 4458 | chr11 | 30836099  | 30853975  | - | 2 | 2.42238 | 0.67967 | 0.81686 | 0.165264 | 0.504557 | 0.478697  | 0.737761  | 0.62166  | 0.988336  |
| TCONS_00059822    | XLOC_004688       | -             | lincRNA            | 1848 | chr11 | 30850369  | 30852897  | - | 2 | 1.17646 | 0.98712 | 0.63524 | 0        | 0.671863 | 0.213453  | 0.921934  | 1.17222  | 0.946436  |
| TCONS_00046840    | XLOC_004691       | -             | intronic_lincRNA   | 3614 | chr11 | 31523722  | 31527779  | - | 2 | 4.69579 | 2.00615 | 2.99681 | 1.21811  | 3.25541  | 2.51206   | 1.79043   | 2.6329   | 3.17557   |
| TCONS_00046009    | XLOC_004          |               |                    |      |       |           |           |   |   |         |         |         |          |          |           |           |          |           |

|                   |                   |               |                    |       |       |          |          |   |   |         |          |         |           |           |          |          |          |           |
|-------------------|-------------------|---------------|--------------------|-------|-------|----------|----------|---|---|---------|----------|---------|-----------|-----------|----------|----------|----------|-----------|
| TCONS_00056843    | XLOC_004708       | -             | lincRNA            | 1543  | chr11 | 35038957 | 35088718 | - | 4 | 0.08818 | 0.29167  | 0.83174 | 0.393398  | 0.175821  | 0.907417 | 0.221071 | 0.436593 | 0         |
| TCONS_00049251    | XLOC_004708       | -             | lincRNA            | 1724  | chr11 | 35085628 | 35088718 | - | 2 | 0.45788 | 1.08936  | 0.59626 | 0.955684  | 0.975613  | 0.954997 | 0.419267 | 1.20081  | 0.872061  |
| TCONS_00046870    | XLOC_004717       | -             | lincRNA            | 1543  | chr11 | 40668370 | 40955268 | - | 2 | 2.27876 | 0.68516  | 0.83249 | 0.0476795 | 0.5959    | 0.419236 | 0.523017 | 1.68034  | 0.172187  |
| TCONS_00046872    | XLOC_004718       | -             | lincRNA            | 470   | chr11 | 41244411 | 41482011 | - | 2 | 2.56854 | 0.99676  | 1.81941 | 0         | 0.630136  | 0.791349 | 0.770267 | 2.66151  | 0.0591431 |
| TCONS_00046871    | XLOC_004718       | -             | lincRNA            | 1179  | chr11 | 41244411 | 41266721 | - | 3 | 5.00651 | 0.86178  | 0.68332 | 0         | 0.230682  | 0        | 1.38499  | 1.76647  | 0         |
| TCONS_00055596    | XLOC_004019       | -             | lincRNA            | 2033  | chr11 | 43879217 | 43881307 | + | 2 | 3.619   | 3.2402   | 2.58772 | 2.30476   | 2.44892   | 2.64793  | 1.81582  | 2.1505   | 2.42586   |
| TCONS_00052895    | XLOC_004024       | -             | intronic_lincRNA   | 2717  | chr11 | 44322406 | 44328139 | + | 2 | 0.60839 | 0.36489  | 0.33213 | 1.95763   | 0.317328  | 0.698407 | 0.277894 | 0.542587 | 0.48141   |
| TCONS_00048739    | XLOC_004025       | -             | lincRNA            | 469   | chr11 | 44360830 | 44525249 | + | 2 | 0.37681 | 1.87204  | 1.06689 | 0.239372  | 0         | 0.263656 | 0.677075 | 0        | 0         |
| TCONS_00049259    | XLOC_004723       | -             | intronic_lincRNA   | 1647  | chr11 | 45161264 | 45164016 | - | 2 | 2.39725 | 1.46707  | 1.25497 | 0.0884963 | 0.510372  | 0.486313 | 0.68724  | 0.723724 | 0.878703  |
| TCONS_00058425    | XLOC_004765       | -             | anti-sense_lincRNA | 1850  | chr11 | 57298292 | 57310973 | - | 2 | 0.24738 | 0.21433  | 0.16919 | 0.19399   | 0.260962  | 0.255832 | 0.318741 | 0.682961 | 1.08533   |
| TCONS_00046940    | XLOC_004774       | -             | lincRNA            | 6724  | chr11 | 5896278  | 58904397 | - | 3 | 3.44334 | 3.20593  | 3.94185 | 1.09399   | 2.90484   | 2.17577  | 2.22303  | 2.91346  | 3.08002   |
| ENST00000532845.1 | ENSG00000245571.2 | AP001258.4    | lincRNA            | 516   | chr11 | 58903398 | 58907588 | - | 2 | 1.30588 | 0.80724  | 2.27111 | 1.10241   | 1.8015    | 1.79302  | 1.61234  | 4.13813  | 1.53547   |
| TCONS_00046942    | XLOC_004776       | -             | lincRNA            | 1432  | chr11 | 59038403 | 59052044 | - | 3 | 2.64929 | 1.32191  | 2.55384 | 1.09162   | 2.74931   | 1.94262  | 0.665706 | 2.29111  | 1.68994   |
| TCONS_00058074    | XLOC_004078       | -             | lincRNA            | 743   | chr11 | 60674261 | 60677586 | + | 2 | 1.12457 | 1.04912  | 1.29946 | 0.354509  | 0.456338  | 0.909884 | 1.20181  | 1.34974  | 1.17834   |
| TCONS_00046154    | XLOC_004106       | -             | intronic_lincRNA   | 474   | chr11 | 62225986 | 62238717 | + | 2 | 1.84997 | 0        | 0       | 0         | 0         | 0        | 0        | 0.302326 | 0         |
| TCONS_00052951    | XLOC_004124       | -             | intronic_lincRNA   | 375   | chr11 | 63590086 | 63590746 | + | 2 | 0       | 0        | 0.41692 | 1.84545   | 0         | 0.814175 | 0.355118 | 0        | 0.339361  |
| TCONS_00049343    | XLOC_004834       | -             | lincRNA            | 746   | chr11 | 64015388 | 64016361 | - | 2 | 0.1864  | 1.43454  | 0.25844 | 0.470072  | 0.340354  | 0.258532 | 0.760491 | 0.447398 | 0.426107  |
| ENST00000499732.1 | ENSG00000245532.4 | NEAT1         | lincRNA            | 1745  | chr11 | 65190245 | 65192232 | + | 2 | 38.3858 | 100.419  | 50.03   | 172.393   | 76.567    | 110.98   | 32.7914  | 80.8779  | 69.0475   |
| TCONS_00055658    | XLOC_004156       | -             | lincRNA            | 2043  | chr11 | 65190277 | 65192644 | + | 3 | 48.0523 | 49.4876  | 56.5769 | 75.6351   | 78.0167   | 97.864   | 49.5976  | 54.6561  | 54.0414   |
| TCONS_00049886    | XLOC_004156       | -             | lincRNA            | 10347 | chr11 | 65193896 | 65211439 | + | 3 | 7.57803 | 39.413   | 12.9863 | 41.4173   | 28.2979   | 37.1251  | 12.7819  | 22.9071  | 28.8235   |
| TCONS_00057282    | XLOC_004156       | -             | lincRNA            | 11432 | chr11 | 65193898 | 65211621 | + | 2 | 47.6177 | 141.625  | 32.158  | 75.9986   | 67.8739   | 74.0206  | 41.6656  | 52.1371  | 61.9227   |
| TCONS_00049882    | XLOC_004156       | -             | lincRNA            | 2221  | chr11 | 65201356 | 65204968 | + | 2 | 0.23747 | 0.69981  | 0.22359 | 0.875336  | 0.290363  | 0.839298 | 0        | 0        | 0.207199  |
| TCONS_00053854    | XLOC_004158       | -             | lincRNA            | 380   | chr11 | 65265170 | 65266599 | + | 3 | 0       | 0        | 0.4598  | 0.958278  | 0.881235  | 0        | 0.371591 | 0        | 0.33966   |
| TCONS_00047764    | XLOC_004158       | -             | lincRNA            | 850   | chr11 | 65265194 | 65266650 | + | 3 | 10.0273 | 7.10908  | 9.83715 | 14.7329   | 10.0364   | 10.416   | 8.54036  | 10.1189  | 8.66289   |
| TCONS_00047768    | XLOC_004158       | -             | lincRNA            | 5023  | chr11 | 65268350 | 65273491 | + | 2 | 5267.65 | 2856.41  | 5078.53 | 0         | 0         | 0        | 3564.51  | 4764.74  | 4086.63   |
| TCONS_00048848    | XLOC_004163       | -             | lincRNA            | 525   | chr11 | 65433405 | 65439134 | + | 2 | 0.93697 | 1.32356  | 1.53662 | 1.58315   | 0.191963  | 1.52511  | 0.556035 | 0.760559 | 0.901084  |
| TCONS_00049382    | XLOC_004880       | -             | lincRNA            | 2359  | chr11 | 66012233 | 66015654 | - | 2 | 1.13468 | 1.11298  | 0.35514 | 0.266788  | 0.512426  | 0.586335 | 0.513367 | 0.595715 | 0.320824  |
| TCONS_00048861    | XLOC_004179       | -             | lincRNA            | 655   | chr11 | 66115284 | 66116924 | + | 2 | 1.34105 | 1.72492  | 1.40015 | 1.69343   | 1.5007    | 1.55268  | 1.30961  | 2.15499  | 1.02476   |
| ENST00000534517.1 | ENSG00000255031.1 | RP11-802E16.3 | anti-sense_lincRNA | 664   | chr11 | 67820290 | 67821229 | + | 2 | 0.21919 | 0.15373  | 0       | 0         | 0.133749  | 0.152239 | 0.128353 | 0        | 0         |
| ENST00000512200.1 | ENSG00000250508.1 | RP11-757G1.6  | lincRNA            | 3252  | chr11 | 68638132 | 68642010 | + | 2 | 1.17091 | 0.71732  | 0.77559 | 0.880504  | 0.845165  | 1.01354  | 0.267152 | 0.605012 | 0.963822  |
| TCONS_00056948    | XLOC_004920       | -             | lincRNA            | 238   | chr11 | 68804881 | 68808163 | - | 2 | 0       | 0        | 0       | 0         | 0         | 0        | 1.54696  | 0        | 1.39062   |
| TCONS_00047127    | XLOC_004929       | -             | lincRNA            | 286   | chr11 | 70055303 | 70058619 | - | 2 | 2.27737 | 2.54278  | 2.60128 | 0.743465  | 0         | 0        | 1.49923  | 0        | 0         |
| TCONS_00053020    | XLOC_004233       | -             | intronic_lincRNA   | 1100  | chr11 | 71186269 | 71187946 | + | 2 | 1.69887 | 1.02447  | 1.09051 | 5.05502   | 1.57652   | 1.25238  | 0.783951 | 2.06679  | 2.5103    |
| TCONS_00053440    | XLOC_004933       | -             | lincRNA            | 686   | chr11 | 71512288 | 71513975 | - | 2 | 1.4652  | 0.73348  | 0       | 1.05666   | 0.255246  | 0.290621 | 0.24479  | 0.167904 | 0.11983   |
| TCONS_00051997    | XLOC_004250       | -             | lincRNA            | 2106  | chr11 | 72911033 | 72918216 | + | 3 | 0.14384 | 0.40599  | 0.14843 | 0.0715712 | 0.183373  | 0.57422  | 1.05993  | 0.409166 | 0.630023  |
| TCONS_00046325    | XLOC_004250       | -             | lincRNA            | 2242  | chr11 | 72911418 | 72918117 | + | 3 | 1.33682 | 1.07496  | 1.65315 | 0.434765  | 1.07567   | 0.566248 | 2.89778  | 1.74447  | 1.31154   |
| TCONS_00046326    | XLOC_004250       | -             | lincRNA            | 1719  | chr11 | 72911527 | 72918099 | + | 3 | 1.24272 | 0        | 0.85155 | 0.126345  | 0.428708  | 0        | 0.538545 | 0        | 0.373267  |
| TCONS_00049429    | XLOC_004946       | -             | lincRNA            | 260   | chr11 | 72926864 | 72929110 | - | 2 | 3.11332 | 1.17742  | 0       | 1.02775   | 0         | 0        | 3.18345  | 1.41251  | 0         |
| TCONS_00057329    | XLOC_004262       | -             | anti-sense_lincRNA | 3464  | chr11 | 74559160 | 74570328 | + | 3 | 0.15621 | 0.16492  | 0       | 0.353999  | 0.0569053 | 0.175391 | 0.141153 | 0.073492 | 0.0989448 |
| TCONS_00055723    | XLOC_004262       | -             | anti-sense_lincRNA | 9475  | chr11 | 74559160 | 74574066 | + | 2 | 3.18301 | 2.42128  | 2.28499 | 2.13723   | 2.69808   | 2.91548  | 1.46597  | 2.10779  | 3.03349   |
| TCONS_00053939    | XLOC_004263       | -             | intronic_lincRNA   | 1827  | chr11 | 74585309 | 74588698 | + | 3 | 1.31706 | 1.52159  | 1.71597 | 1.69193   | 1.58799   | 2.20536  | 0.646562 | 0.989531 | 2.05942   |
| ENST00000527803.1 | ENSG00000255326.1 | CTD-2530H12.4 | anti-sense_lincRNA | 651   | chr11 | 75294241 | 75305710 | + | 2 | 0.45096 | 0.47466  | 0.62792 | 0.142376  | 0.137653  | 0.156653 | 0.132154 | 0.543627 | 0.646225  |
| ENST00000528075.1 | ENSG00000255100.1 | RP11-21L23.3  | lincRNA            | 336   | chr11 | 76493625 | 76494106 | - | 2 | 2.21331 | 2.68623  | 4.88295 | 2.85203   | 2.81009   | 1.57455  | 0.464419 | 3.76645  | 0.878908  |
| TCONS_00056977    | XLOC_004979       | -             | intronic_lincRNA   | 2498  | chr11 | 77519414 | 77522230 | - | 2 | 4.84191 | 2.61374  | 3.42671 | 1.92156   | 4.46589   | 3.8252   | 1.77635  | 3.53207  | 3.56622   |
| ENST00000532831.1 | ENSG00000246174.3 | KCTD21-AS1    | anti-sense_lincRNA | 856   | chr11 | 77850817 | 77853105 | + | 2 | 2.17347 | 2.60065  | 2.03791 | 0.684281  | 1.60693   | 0.956308 | 3.12637  | 1.98025  | 1.80522   |
| ENST00000527321.1 | ENSG00000246174.3 | KCTD21-AS1    | lincRNA            | 586   | chr11 | 77850861 | 77852968 | + | 2 | 0       | 5.46E-05 | 0       | 1.45E-05  | 0.314697  | 0.568766 | 0.82133  | 0        | 1.15081   |
| TCONS_00049484    | XLOC_005004       | -             | lincRNA            | 675   | chr11 | 85564771 | 85565950 | - | 2 | 1.92726 | 1.95171  | 1.63789 | 0.270307  | 0.783684  | 0        | 0.626516 | 0.85935  | 0.245275  |
| TCONS_00052037    | XLOC_004301       | -             | lincRNA            | 11166 | chr11 | 86411219 | 86422606 | + | 2 | 4.6485  | 1.60151  | 3.75067 | 1.05561   | 3.97663   | 4.0044   | 2.15536  | 1.99424  | 1.24492   |
| TCONS_00049984    | XLOC_004304       | -             | lincRNA            | 3774  | chr11 | 87069743 | 87266594 | + | 3 | 0.91428 | 1.14577  | 0.91516 | 3.04314   | 1.88972   | 3.67795  | 1.54715  | 3.18831  | 5.56622   |
| TCONS_00053981    | XLOC_004304       | -             | lincRNA            | 6951  | chr11 | 87266925 | 87275516 | + | 2 | 0.48416 | 0.742    | 0.54571 | 1.90435   | 1.47225   | 2.91447  | 0.7489   | 2.01825  | 3.39698   |
| TCONS_00053066    | XLOC_004305       | -             | lincRNA            | 1098  | chr11 | 88071017 | 88144456 | + | 4 | 2.04318 | 1.34269  | 2.26399 | 1.07035   | 1.85484   | 1.33363  | 3.40479  | 2.16151  | 0.967665  |
| TCONS_00056634    | XLOC_004306       | -             | lincRNA            | 417   | chr11 | 88157600 | 88160432 | + | 2 | 0       | 0.33306  | 0       | 1.18876   | 1.15985   | 1.31016  | 0.282785 | 3.46594  | 0         |
| TCONS_00053071    | XLOC_004314       | -             | lincRNA            | 237   | chr11 | 90094676 | 90102414 | + | 2 | 0       | 0        | 0       | 4.46793   | 0.30298   | 0        | 1.57731  | 0        | 1.41681   |
| TCONS_00051038    | XLOC_004317       | -             | lincRNA            | 1175  | chr11 | 92980982 | 92985352 | + | 2 | 0.72114 | 0.96308  | 0.41791 | 0         | 0.25116   | 0        | 0.843017 | 0.599585 | 0.492759  |
| TCONS_00046409    | XLOC_004317       | -             | lincRNA            | 8317  | chr11 | 92981247 | 92992465 | + | 3 | 2.69947 | 0.97658  | 1.31356 | 0.181231  | 0.547067  | 0.508452 | 1.11902  | 0.925638 | 0.859848  |
| TCONS_00051037    | XLOC_004317       | -             | lincRNA            | 977   | chr11 | 92981337 | 92983925 | + | 2 | 0.73371 | 2.0453   | 0.611   | 0         | 0.368844  | 0.568189 | 1.03572  | 0        | 0.414905  |
| TCONS_00056239    | XLOC_005018       | -             | anti-sense_lincRNA | 1213  | chr11 | 93097266 | 93098858 | - | 2 | 2.01302 | 1.0495   | 0.62216 | 0.442685  | 1.15625   | 0.62568  | 1.33294  | 0.877179 | 0.857207  |
| TCONS_00046420    | XLOC_004324       | -             | intronic_lincRNA   | 882   | chr11 | 93907206 | 93909416 | + | 2 | 2.38956 | 0.52099  | 0.30935 | 0.940186  | 0.519253  | 0.310169 | 0.519524 | 1.42778  | 0.8511    |
| TCONS_00056646    | XLOC_004333       | -             | lincRNA            | 781   | chr11 | 94884658 | 94890810 | + | 2 | 1.75215 | 0.61241  | 2.42633 | 0.441663  | 0.639297  | 1.9431   | 0.509791 | 1.54003  | 0.700334  |
| TCONS_00049506    | XLOC_005032       | -             | lincRNA            | 276   | chr11 | 95663339 | 95683980 | - | 2 | 0       | 1.90519  | 0.97835 | 0.83395   |           |          |          |          |           |

|                   |                   |               |                    |       |       |           |           |   |   |         |         |          |           |           |           |           |          |          |
|-------------------|-------------------|---------------|--------------------|-------|-------|-----------|-----------|---|---|---------|---------|----------|-----------|-----------|-----------|-----------|----------|----------|
| TCONS_00050561    | XLOC_005038       | -             | lincRNA            | 878   | chr11 | 98365043  | 98366112  | - | 2 | 1.05158 | 1.67708 | 0.6224   | 0         | 0         | 0.104002  | 0.0871073 | 0        | 0.256849 |
| TCONS_00058192    | XLOC_004343       | -             | lincRNA            | 929   | chr11 | 101000702 | 101003858 | + | 2 | 0.41924 | 0.29229 | 0.48194  | 0.0879413 | 0.169497  | 0.0967002 | 0.80911   | 0.556059 | 0.397904 |
| TCONS_00053082    | XLOC_004344       | -             | lincRNA            | 368   | chr11 | 101212719 | 101253579 | + | 2 | 2.40004 | 0.43288 | 0.43508  | 1.1537    | 0.377071  | 0         | 1.11261   | 1.0063   | 0.353884 |
| TCONS_00048996    | XLOC_004351       | -             | anti-sense_lincRNA | 4676  | chr11 | 102477970 | 102558005 | + | 7 | 0.36506 | 3.21686 | 0.03108  | 1.65786   | 0.75421   | 0.0314047 | 0.376856  | 1.54101  | 0.862868 |
| TCONS_00058222    | XLOC_004372       | -             | lincRNA            | 479   | chr11 | 110351038 | 110360344 | + | 2 | 0.36342 | 0.25767 | 0.51372  | 0.461474  | 0.224256  | 0.508243  | 0.868998  | 1.78036  | 0.21052  |
| TCONS_00057873    | XLOC_005084       | -             | lincRNA            | 5007  | chr11 | 111254569 | 111262296 | - | 3 | 10.9629 | 6.56279 | 8.33354  | 2.31549   | 3.21742   | 5.05871   | 3.88345   | 1.93517  | 2.80585  |
| TCONS_00050601    | XLOC_005084       | -             | lincRNA            | 1111  | chr11 | 111268305 | 111326680 | - | 5 | 2.39406 | 2.88464 | 1.38894  | 0.717119  | 0.334737  | 4.13359   | 1.6992    | 0.885858 | 0.86979  |
| TCONS_00050600    | XLOC_005084       | -             | lincRNA            | 1171  | chr11 | 111268305 | 111326680 | - | 4 | 3.04333 | 8.6014  | 2.90448  | 2.04899   | 1.47129   | 0.0009726 | 3.6079    | 0.297895 | 2.44257  |
| TCONS_00046517    | XLOC_004403       | -             | anti-sense_lincRNA | 1043  | chr11 | 114387746 | 114411483 | + | 5 | 1.59978 | 0.99213 | 0.99353  | 0.324024  | 0.732832  | 0.805947  | 0.0002473 | 1.152    | 0.252731 |
| TCONS_00058242    | XLOC_004403       | -             | anti-sense_lincRNA | 1069  | chr11 | 114387942 | 114458372 | + | 6 | 0.01016 | 0.00089 | 7.96E-05 | 0.0008405 | 0.0006681 | 0         | 0.93988   | 5.55E-05 | 0        |
| TCONS_00058243    | XLOC_004403       | -             | anti-sense_lincRNA | 1152  | chr11 | 114387942 | 114458372 | + | 7 | 0.50124 | 0.98321 | 0.81399  | 0.721894  | 0.581745  | 0.766306  | 0.13293   | 0        | 0.628    |
| TCONS_00052745    | XLOC_005135       | -             | lincRNA            | 3741  | chr11 | 118786227 | 118796325 | - | 2 | 2.65304 | 2.99086 | 2.06362  | 1.89711   | 2.96507   | 1.98516   | 1.49587   | 1.63171  | 2.47525  |
| ENST00000526453.1 | ENSG00000255121.2 | RP11-110I1.12 | lincRNA            | 1359  | chr11 | 118866905 | 118868714 | - | 2 | 1.31993 | 1.40557 | 1.50885  | 0.663135  | 0.637817  | 0.4252    | 1.06211   | 0.835402 | 1.34767  |
| TCONS_00056715    | XLOC_004436       | -             | lincRNA            | 293   | chr11 | 119607387 | 119610291 | + | 2 | 0       | 0       | 0        | 0         | 0.686888  | 0         | 1.38431   | 0        | 0        |
| TCONS_00051124    | XLOC_004438       | -             | lincRNA            | 2822  | chr11 | 119776065 | 119786458 | + | 2 | 0.54511 | 0.1886  | 0.37191  | 0.219644  | 2.22587   | 0.643594  | 0.311166  | 0.245074 | 0.15403  |
| TCONS_00055019    | XLOC_004439       | -             | lincRNA            | 510   | chr11 | 119808785 | 119810626 | + | 2 | 0       | 0.46291 | 0.23044  | 0.207527  | 1.8128    | 0.914007  | 0.194669  | 0        | 0        |
| TCONS_00053150    | XLOC_004440       | -             | lincRNA            | 13299 | chr11 | 119846308 | 119894308 | + | 2 | 0.81109 | 0.38765 | 0.46669  | 2.07009   | 2.95426   | 2.03814   | 1.36081   | 1.08228  | 0.22865  |
| TCONS_00053151    | XLOC_004441       | -             | lincRNA            | 3507  | chr11 | 119929725 | 119940673 | + | 3 | 0.46315 | 0.8968  | 0.42096  | 1.50906   | 0.612765  | 0.191317  | 0.316899  | 0.533958 | 0.191827 |
| ENST0000052986.1  | ENSG00000255248.2 | RP11-166D19.1 | lincRNA            | 3287  | chr11 | 121959818 | 121971737 | - | 2 | 43.9905 | 49.3907 | 30.2198  | 25.9082   | 19.3374   | 20.9973   | 27.128    | 26.3438  | 22.6635  |
| TCONS_00047422    | XLOC_005165       | -             | lincRNA            | 759   | chr11 | 124821166 | 124823855 | - | 2 | 0.72834 | 0.12735 | 1.00934  | 0.803431  | 0.7755    | 0.631228  | 1.59089   | 0.728029 | 0.624148 |
| TCONS_00051153    | XLOC_004473       | -             | lincRNA            | 220   | chr11 | 124984689 | 124995191 | + | 2 | 3.10309 | 0       | 0        | 2.10687   | 0         | 0         | 0         | 0        | 0        |
| TCONS_00056736    | XLOC_004496       | -             | lincRNA            | 242   | chr11 | 128132772 | 128174926 | + | 2 | 0       | 1.56472 | 0        | 0         | 0         | 0         | 2.86883   | 0        | 0        |
| TCONS_00047468    | XLOC_005205       | -             | anti-sense_lincRNA | 5222  | chr11 | 134129624 | 134146297 | - | 2 | 1.32189 | 0.85721 | 1.17704  | 0.318438  | 1.49088   | 1.41342   | 0.7642    | 0.814317 | 0.837814 |
| ENST00000540226.1 | ENSG00000256948.1 | RP11-598F7.3  | intronic_lincRNA   | 586   | chr12 | 215690    | 221016    | - | 2 | 0.52648 | 0       | 0.18403  | 0.998812  | 0.161178  | 0.183211  | 0.155122  | 0.849903 | 2.26989  |
| TCONS_00067221    | XLOC_005215       | -             | lincRNA            | 513   | chr12 | 799000    | 812423    | + | 2 | 0.97265 | 0.2292  | 2.73807  | 1.64421   | 0.797826  | 0.678881  | 0.57819   | 1.05413  | 0        |
| TCONS_00064303    | XLOC_005931       | -             | intronic_lincRNA   | 473   | chr12 | 2905130   | 2906130   | - | 2 | 1.48535 | 1.3172  | 1.05075  | 0.943368  | 1.14643   | 0         | 0.222237  | 1.82083  | 0.21524  |
| TCONS_00067231    | XLOC_005230       | -             | lincRNA            | 276   | chr12 | 3426008   | 3427416   | + | 2 | 1.2724  | 0       | 0.97835  | 0.833956  | 0.834464  | 1.8478    | 0         | 0        | 0        |
| TCONS_00067232    | XLOC_005232       | -             | lincRNA            | 436   | chr12 | 3528853   | 3529617   | + | 2 | 0       | 0       | 0.6108   | 0         | 0         | 0         | 1.03549   | 0        | 0        |
| TCONS_00067234    | XLOC_005235       | -             | lincRNA            | 233   | chr12 | 3865725   | 3866645   | + | 2 | 0       | 0       | 9.72401  | 0         | 0         | 0         | 0         | 0        | 0        |
| TCONS_00065541    | XLOC_005937       | -             | lincRNA            | 424   | chr12 | 3983968   | 4000879   | - | 2 | 2.2587  | 0.64482 | 1.28955  | 0         | 0.280682  | 2.22038   | 0         | 0        | 0        |
| TCONS_00062815    | XLOC_005944       | -             | lincRNA            | 683   | chr12 | 5539811   | 5540652   | - | 2 | 1.68487 | 0.44285 | 0.58555  | 0.132906  | 0.128425  | 0         | 0         | 0.168967 | 0.120583 |
| TCONS_00065015    | XLOC_005249       | -             | lincRNA            | 2335  | chr12 | 5621174   | 5632911   | + | 3 | 0.86586 | 1.16197 | 0.77591  | 0.052758  | 0.210535  | 0.342243  | 0.327725  | 0.908724 | 0.241416 |
| TCONS_00062023    | XLOC_005249       | -             | lincRNA            | 3508  | chr12 | 5629453   | 5633177   | + | 2 | 1.69428 | 0.57418 | 0.65724  | 0.217394  | 1.08941   | 0.416739  | 0.580916  | 0.239372 | 0.245303 |
| TCONS_00072331    | XLOC_005253       | -             | lincRNA            | 664   | chr12 | 6502628   | 6503552   | + | 2 | 1.75354 | 0.9224  | 1.37247  | 0.415112  | 1.60498   | 1.97911   | 0         | 0.704112 | 0.376741 |
| ENST00000537269.1 | ENSG00000257084.1 | U47924.27     | anti-sense_lincRNA | 350   | chr12 | 7072409   | 7073610   | + | 2 | 19.4455 | 16.042  | 22.5303  | 4.30936   | 18.2151   | 16.1706   | 25.5235   | 13.0311  | 8.74538  |
| TCONS_00063656    | XLOC_005269       | -             | anti-sense_lincRNA | 1306  | chr12 | 7091837   | 7096977   | + | 3 | 2.85832 | 1.79353 | 2.21442  | 1.10036   | 2.00562   | 1.97348   | 1.32568   | 0.802794 | 1.25562  |
| TCONS_00067267    | XLOC_005280       | -             | lincRNA            | 1055  | chr12 | 8380220   | 8388617   | + | 2 | 0.94493 | 0.34955 | 0.87515  | 1.02475   | 0.113895  | 0.279385  | 4.51E-06  | 1.23032  | 0.248186 |
| ENST00000304751.9 | ENSG00000215241.3 | RP11-266K4.9  | lincRNA            | 795   | chr12 | 8388011   | 8391542   | + | 2 | 1.21025 | 0.93117 | 0.63142  | 0.574419  | 0.87604   | 0.428011  | 0.497542  | 3.43E-05 | 0.130702 |
| TCONS_00070358    | XLOC_005283       | -             | lincRNA            | 3246  | chr12 | 8929837   | 8935716   | + | 3 | 3.0273  | 2.06488 | 3.64811  | 1.00697   | 1.31725   | 0         | 1.51873   | 2.11585  | 0.502758 |
| TCONS_00068238    | XLOC_005283       | -             | lincRNA            | 1014  | chr12 | 8929846   | 8935806   | + | 3 | 4.40997 | 0.00077 | 0.82295  | 0.0009201 | 0         | 0         | 3.30525   | 1.79254  | 0        |
| TCONS_00068237    | XLOC_005283       | -             | lincRNA            | 1557  | chr12 | 8929846   | 8935806   | + | 3 | 0       | 1.53193 | 2.51561  | 0.404754  | 0.43997   | 1.00709   | 1.86043   | 1.06244  | 0        |
| TCONS_00063672    | XLOC_005283       | -             | lincRNA            | 1102  | chr12 | 8929875   | 8935920   | + | 4 | 1.22458 | 0       | 0.46606  | 0.458661  | 0.774394  | 0         | 0.170516  | 0        | 0.279904 |
| TCONS_00063671    | XLOC_005283       | -             | lincRNA            | 1180  | chr12 | 8929875   | 8935920   | + | 3 | 2.65441 | 3.65126 | 1.24711  | 1.32328   | 2.80896   | 1.34942   | 2.41268   | 2.65979  | 1.75208  |
| TCONS_00062080    | XLOC_005283       | -             | lincRNA            | 3874  | chr12 | 8929875   | 8935920   | + | 2 | 13.9739 | 8.68415 | 13.3844  | 6.77829   | 6.34159   | 7.53989   | 9.92215   | 7.14596  | 8.30897  |
| TCONS_00067269    | XLOC_005292       | -             | lincRNA            | 3470  | chr12 | 9393145   | 9397024   | + | 2 | 2.27948 | 1.92189 | 3.93803  | 2.23052   | 2.40373   | 1.44037   | 2.52837   | 2.30734  | 1.64019  |
| TCONS_00062084    | XLOC_005292       | -             | lincRNA            | 2210  | chr12 | 9397373   | 9410728   | + | 4 | 0.68667 | 0.882   | 1.77883  | 0.847687  | 1.10326   | 1.20286   | 0.901271  | 1.24379  | 1.44127  |
| TCONS_00063676    | XLOC_005292       | -             | lincRNA            | 906   | chr12 | 9398926   | 9408744   | + | 3 | 1.22318 | 0.39449 | 1.9635   | 1.75987   | 0.343757  | 0.561683  | 0.665266  | 1.02351  | 1.3004   |
| ENST00000541404.1 | ENSG00000256582.1 | RP11-75L1.1   | lincRNA            | 560   | chr12 | 9856673   | 9861946   | + | 2 | 0.56428 | 0.19882 | 0.59295  | 0.535663  | 0.173004  | 0.196539  | 0.666841  | 1.14113  | 0.812123 |
| ENST00000544591.1 | ENSG00000256039.1 | RP11-291B21.2 | lincRNA            | 868   | chr12 | 10705962  | 10710648  | + | 2 | 3.681   | 0.71803 | 20.2255  | 1.29007   | 0.462768  | 0.633391  | 11.4302   | 10.4721  | 5.22983  |
| TCONS_00078227    | XLOC_005318       | -             | lincRNA            | 1576  | chr12 | 10709204  | 10727469  | + | 3 | 0.87909 | 0.06437 | 3.80484  | 0.0726397 | 0         | 0         | 1.86074   | 0.926342 | 0.916823 |
| TCONS_00068266    | XLOC_005318       | -             | lincRNA            | 1840  | chr12 | 10725590  | 10729031  | + | 2 | 0.93331 | 0.21564 | 2.55344  | 0.195175  | 0.0375087 | 0         | 1.24716   | 0.883478 | 0.774944 |
| ENST00000538329.1 | ENSG00000256084.1 | RP11-134N1.2  | lincRNA            | 640   | chr12 | 14369524  | 14374231  | + | 2 | 0.69327 | 0.32445 | 0.48295  | 0.145951  | 0.423418  | 0.160592  | 0.271102  | 0.743348 | 0.132517 |
| TCONS_00065085    | XLOC_005338       | -             | anti-sense_lincRNA | 1123  | chr12 | 14765816  | 14819420  | + | 5 | 1.93501 | 1.6971  | 0.97075  | 0.258758  | 0.746123  | 0.873977  | 0.774488  | 0.874316 | 0.353202 |
| TCONS_00075155    | XLOC_005338       | -             | anti-sense_lincRNA | 619   | chr12 | 14767456  | 14813966  | + | 4 | 3.49581 | 2.57832 | 2.56543  | 1.28029   | 1.22502   | 1.05185   | 2.93433   | 1.40082  | 1.29707  |
| TCONS_00075154    | XLOC_005338       | -             | anti-sense_lincRNA | 4282  | chr12 | 14767456  | 14776682  | + | 3 | 3.57927 | 2.29625 | 3.01759  | 1.47193   | 2.09898   | 1.79616   | 1.85649   | 1.92295  | 1.80859  |
| TCONS_00067297    | XLOC_005342       | -             | lincRNA            | 355   | chr12 | 15154634  | 15158080  | + | 3 | 0       | 0.94018 | 0.47329  | 0         | 1.22876   | 0         | 0         | 0        | 0        |
| TCONS_00068313    | XLOC_005368       | -             | lincRNA            | 2178  | chr12 | 19802412  | 19806074  | + | 4 | 0.44371 | 0.06632 | 0.3301   | 0.224564  | 1.11781   | 0.107109  | 0.630599  | 0.280733 | 0.149567 |
| TCONS_00078233    | XLOC_005368       | -             | lincRNA            | 1192  | chr12 | 19802662  | 19804840  | + | 3 | 0.64342 | 0.36002 | 0.5938   | 0.387559  | 0.341813  | 0.622102  | 0.792802  | 0.341623 | 1.19397  |
| TCONS_00069543    | XLOC_005368       | -             | lincRNA            | 2073  | chr12 | 19803106  | 19806074  | + | 2 | 0.77051 | 0.49472 | 1.05109  | 0.822196  | 1.29788   | 1.24367   | 0.599619  | 1.84239  | 0.937796 |
| TCONS_00068314    | XLOC_005368       | -             | lincRNA            | 465   | chr12 | 19823824  | 19825652  | + | 2 | 0.38245 | 0.27155 | 1.08352  | 0.24301   | 0.236354  | 1.87371   | 0.229255  |          |          |

|                   |                   |               |                    |       |       |          |          |   |    |         |         |         |           |           |          |          |           |           |
|-------------------|-------------------|---------------|--------------------|-------|-------|----------|----------|---|----|---------|---------|---------|-----------|-----------|----------|----------|-----------|-----------|
| TCONS_00073449    | XLOC_005368       | -             | lincRNA            | 436   | chr12 | 20088546 | 20097526 | + | 2  | 0.62427 | 1.73169 | 0.5624  | 0         | 4.05E-05  | 2.06577  | 0.935669 | 0.04326   | 0.499532  |
| TCONS_00062924    | XLOC_006049       | -             | lincRNA            | 1598  | chr12 | 22506138 | 22508106 | - | 2  | 0.72975 | 0.25312 | 0.89947 | 0.229006  | 0.440278  | 0.251695 | 0.585972 | 1.21034   | 0.826931  |
| TCONS_00075174    | XLOC_005387       | -             | lincRNA            | 8788  | chr12 | 22852535 | 23217671 | + | 11 | 2.7551  | 0       | 2.81754 | 0.22294   | 2.69524   | 2.4271   | 2.08456  | 1.02703   | 1.37042   |
| TCONS_00070450    | XLOC_005387       | -             | lincRNA            | 11746 | chr12 | 22852725 | 23221060 | + | 9  | 0.00055 | 0.00703 | 0.0005  | 0.092229  | 1.05652   | 0.546946 | 0        | 0.767844  | 0.0008512 |
| TCONS_00068332    | XLOC_005387       | -             | lincRNA            | 5113  | chr12 | 22852740 | 23203329 | + | 6  | 6.72358 | 1.64818 | 4.02352 | 0.840948  | 4.19512   | 4.24112  | 1.90511  | 1.45187   | 1.7503    |
| TCONS_00069557    | XLOC_005387       | -             | lincRNA            | 8337  | chr12 | 22852895 | 23217665 | + | 10 | 5.53478 | 1.37835 | 2.63126 | 1.03918   | 3.70175   | 3.54932  | 0.301308 | 1.8024    | 1.31625   |
| ENST00000537293.1 | ENSG00000256923.1 | RP11-449P1.1  | lincRNA            | 424   | chr12 | 22895516 | 22896025 | + | 2  | 7.22783 | 3.86894 | 4.8358  | 1.72701   | 6.175     | 7.61274  | 3.00829  | 2.60811   | 3.68852   |
| TCONS_00075907    | XLOC_005387       | -             | lincRNA            | 12066 | chr12 | 22940187 | 23221060 | + | 10 | 8.13548 | 1.51042 | 2.93547 | 0.860293  | 4.67196   | 5.30497  | 1.34403  | 0.697042  | 2.07007   |
| TCONS_00073457    | XLOC_005389       | -             | intronic_lincRNA   | 1134  | chr12 | 24972483 | 24975448 | + | 2  | 0.9823  | 0.07596 | 0.22509 | 0.205834  | 0.396203  | 0.527916 | 0.50336  | 1.73134   | 0.372126  |
| TCONS_00062936    | XLOC_006061       | -             | intronic_lincRNA   | 3825  | chr12 | 25731901 | 25737682 | - | 2  | 6.11281 | 1.57759 | 3.78181 | 0.405923  | 1.43966   | 1.41557  | 1.83038  | 1.35031   | 2.09968   |
| TCONS_00071112    | XLOC_006066       | -             | intronic_lincRNA   | 1815  | chr12 | 26759515 | 26769960 | - | 2  | 1.70593 | 2.23371 | 1.90166 | 2.29911   | 2.1331    | 3.09306  | 1.01329  | 1.74462   | 2.32517   |
| TCONS_00072039    | XLOC_006087       | -             | lincRNA            | 420   | chr12 | 31516331 | 31522637 | - | 2  | 0       | 0.32841 | 0.32848 | 0         | 0.571821  | 0        | 2.22977  | 0.379639  | 0         |
| ENST00000535163.1 | ENSG00000255760.1 | RP11-428G5.5  | lincRNA            | 852   | chr12 | 32030013 | 32040137 | - | 2  | 0       | 0.21806 | 2.59021 | 1.377     | 0.37938   | 1.29799  | 1.08776  | 2.61525   | 3.56238   |
| TCONS_00067360    | XLOC_005437       | -             | lincRNA            | 628   | chr12 | 43240695 | 43243569 | - | 2  | 0.71261 | 1.00098 | 1.32474 | 0.300122  | 0.435449  | 0.495367 | 3.34707  | 1.14698   | 0         |
| TCONS_00065152    | XLOC_005437       | -             | lincRNA            | 2048  | chr12 | 43460122 | 43539392 | + | 2  | 1.15974 | 1.33909 | 0.30196 | 0.138548  | 0.232916  | 0.418702 | 2.62249  | 1.78472   | 0.187489  |
| TCONS_00066251    | XLOC_005437       | -             | lincRNA            | 736   | chr12 | 43541591 | 43542502 | + | 2  | 0.18987 | 1.19584 | 0.52669 | 0         | 0.11559   | 0.526757 | 2.54645  | 1.21571   | 0.21707   |
| TCONS_00070003    | XLOC_006117       | -             | lincRNA            | 1020  | chr12 | 45870542 | 45875923 | - | 2  | 0.24856 | 0.34618 | 1.0269  | 1.09423   | 0.828058  | 1.71869  | 0.430788 | 1.18474   | 0.565513  |
| ENST00000551021.1 | ENSG00000257261.1 | RP11-96H19.1  | lincRNA            | 281   | chr12 | 46777890 | 46781755 | + | 2  | 44.4789 | 15.2549 | 20.234  | 16.5132   | 21.9935   | 40.0574  | 31.0487  | 44.7465   | 25.0326   |
| ENST00000547626.1 | ENSG00000247774.2 | PCED1B-AS1    | lincRNA            | 420   | chr12 | 47599681 | 47603157 | - | 3  | 1.83946 | 2.62727 | 5.91257 | 5.27593   | 3.14502   | 2.58421  | 4.45955  | 7.7469    | 8.05115   |
| TCONS_00067374    | XLOC_005449       | -             | anti-sense_lincRNA | 587   | chr12 | 48099879 | 48113448 | + | 2  | 1.05026 | 1.6628  | 2.93666 | 0.996219  | 0.482267  | 1.09641  | 2.01121  | 1.27148   | 1.35836   |
| TCONS_00069601    | XLOC_005450       | -             | lincRNA            | 760   | chr12 | 48153646 | 48166173 | + | 2  | 2.36288 | 1.14408 | 1.76314 | 0.572851  | 0.442344  | 2.39436  | 0.952792 | 0.872049  | 0.311511  |
| TCONS_00067885    | XLOC_006153       | -             | anti-sense_lincRNA | 262   | chr12 | 49691363 | 49697017 | - | 2  | 4.54546 | 1.14448 | 9.46622 | 1.99869   | 2.01048   | 0        | 4.1189   | 1.37142   | 0         |
| TCONS_00065732    | XLOC_006155       | -             | intronic_lincRNA   | 305   | chr12 | 49945694 | 49946613 | - | 2  | 2.83751 | 0       | 0       | 0         | 0         | 1.35742  | 0        | 0         | 0         |
| TCONS_00067891    | XLOC_006165       | -             | anti-sense_lincRNA | 708   | chr12 | 50344952 | 50345908 | - | 2  | 0.20029 | 0.84164 | 0.83434 | 0.505366  | 1.88316   | 0.416955 | 0.81876  | 0.48149   | 0.229167  |
| TCONS_00065740    | XLOC_006165       | -             | anti-sense_lincRNA | 266   | chr12 | 50345713 | 50348023 | - | 2  | 0       | 3.24952 | 0       | 0         | 2.44155   | 1.04946  | 1.94282  | 2.59027   | 0         |
| ENST00000550214.1 | ENSG00000257588.1 | RP11-469H8.6  | anti-sense_lincRNA | 1031  | chr12 | 50352655 | 50356707 | - | 2  | 3.80178 | 3.58645 | 6.24782 | 1.31108   | 7.42747   | 4.57885  | 2.97501  | 3.70144   | 2.30166   |
| ENST00000552576.1 | ENSG00000258056.1 | RP11-644F5.11 | anti-sense_lincRNA | 1274  | chr12 | 56122888 | 56124467 | + | 2  | 3.70289 | 6.46533 | 5.86528 | 4.71175   | 4.13139   | 4.9827   | 5.29864  | 4.28496   | 4.31076   |
| TCONS_00067431    | XLOC_005550       | -             | lincRNA            | 2854  | chr12 | 56403521 | 56414145 | + | 3  | 1.15402 | 0.87835 | 0.99726 | 0.50632   | 0.972179  | 0.529856 | 0.28544  | 0.635534  | 0.347815  |
| TCONS_00062360    | XLOC_005561       | -             | lincRNA            | 352   | chr12 | 56914086 | 56914554 | + | 2  | 3.30951 | 0       | 0.48306 | 0         | 0         | 0.4693   | 0        | 1.11752   | 0         |
| TCONS_00064686    | XLOC_006282       | -             | lincRNA            | 1010  | chr12 | 65277024 | 65298064 | - | 3  | 3.14523 | 0.35048 | 0.17329 | 0.158253  | 0.152428  | 0.695992 | 0.290791 | 0.499806  | 0.286271  |
| TCONS_00065852    | XLOC_006285       | -             | intronic_lincRNA   | 924   | chr12 | 66270737 | 66275765 | - | 2  | 0.70355 | 1.17729 | 0.38824 | 0.177101  | 0.597369  | 0        | 0        | 0.783928  | 0.320538  |
| TCONS_00066379    | XLOC_005605       | -             | lincRNA            | 3836  | chr12 | 68072646 | 68078740 | + | 2  | 2.27484 | 1.98057 | 2.4689  | 1.12611   | 1.72236   | 1.25662  | 1.66474  | 2.89105   | 2.12503   |
| ENST00000538665.1 | ENSG00000255733.1 | IFNG-AS1      | lincRNA            | 1791  | chr12 | 68383225 | 68415107 | + | 4  | 3.59152 | 4.84627 | 10.9688 | 9.09391   | 3.32543   | 12.515   | 7.45803  | 19.8362   | 12.3466   |
| TCONS_00075645    | XLOC_006291       | -             | lincRNA            | 286   | chr12 | 68489657 | 68512329 | - | 2  | 0       | 0       | 0.86709 | 0         | 0         | 0        | 6.74653  | 3.01289   | 0         |
| TCONS_00069686    | XLOC_005616       | -             | lincRNA            | 419   | chr12 | 69853108 | 69854530 | + | 2  | 0.46194 | 0       | 0.66007 | 0.588911  | 0.287248  | 1.29807  | 0        | 0.381443  | 0         |
| TCONS_00067483    | XLOC_005620       | -             | lincRNA            | 1365  | chr12 | 70218339 | 70249419 | + | 2  | 2.10103 | 1.09432 | 2.04138 | 0.219905  | 0.423011  | 2.23588  | 1.4591   | 1.03883   | 1.98622   |
| ENST00000552998.1 | ENSG00000257613.1 | RP11-320P7.1  | lincRNA            | 629   | chr12 | 70612912 | 70615642 | - | 2  | 3.08083 | 1.8308  | 1.48678 | 0.598838  | 2.60652   | 1.64735  | 2.36515  | 1.90708   | 2.17536   |
| TCONS_00066991    | XLOC_006309       | -             | anti-sense_lincRNA | 1525  | chr12 | 75727270 | 75730109 | - | 2  | 3.91493 | 2.03024 | 2.61098 | 0.968209  | 1.56733   | 1.54995  | 1.6086   | 2.15897   | 1.81631   |
| TCONS_00071303    | XLOC_006309       | -             | anti-sense_lincRNA | 2535  | chr12 | 75727270 | 75784700 | - | 4  | 0.72757 | 2.29242 | 1.23986 | 0.564132  | 1.18224   | 0.559554 | 1.48384  | 1.53701   | 0.589528  |
| TCONS_00064721    | XLOC_006309       | -             | anti-sense_lincRNA | 1649  | chr12 | 75753315 | 75784721 | - | 3  | 3.53875 | 3.27048 | 0.82487 | 0.411867  | 0.0005165 | 0.971941 | 2.01133  | 0.0007054 | 1.72721   |
| TCONS_00064720    | XLOC_006309       | -             | anti-sense_lincRNA | 1606  | chr12 | 75753351 | 75784774 | - | 2  | 3.36396 | 2.48506 | 5.20984 | 2.63892   | 3.808     | 2.30171  | 2.54754  | 5.5006    | 1.53229   |
| TCONS_00064722    | XLOC_006309       | -             | lincRNA            | 4357  | chr12 | 75779890 | 75784702 | - | 2  | 7.82144 | 6.26003 | 7.07938 | 2.64281   | 4.11989   | 4.04103  | 3.76414  | 4.45758   | 4.22181   |
| TCONS_00065315    | XLOC_005634       | -             | lincRNA            | 625   | chr12 | 76953753 | 76956438 | + | 2  | 0.47841 | 0.67209 | 0.33357 | 0.604499  | 0.73094   | 1.33036  | 0.98332  | 1.15526   | 0.960794  |
| ENST00000550042.1 | ENSG00000231121.2 | RP1-34H18.1   | lincRNA            | 991   | chr12 | 77718421 | 77966055 | + | 2  | 4.25116 | 6.19203 | 6.30106 | 1.7827    | 2.88814   | 2.85106  | 4.6172   | 4.09563   | 1.90578   |
| ENST00000550268.1 | ENSG00000257894.1 | RP1-78O14.1   | anti-sense_lincRNA | 1155  | chr12 | 79786697 | 79849240 | - | 2  | 1.17425 | 1.70753 | 1.17385 | 0.603801  | 2.32463   | 1.84384  | 3.38353  | 0.930978  | 0.606381  |
| TCONS_00072171    | XLOC_006326       | -             | intronic_lincRNA   | 1090  | chr12 | 79802644 | 79804182 | - | 2  | 0.91622 | 0.63757 | 0.63022 | 0.647992  | 1.03979   | 0.633248 | 0.925028 | 0.636166  | 0.130189  |
| TCONS_00065323    | XLOC_005640       | -             | anti-sense_lincRNA | 1125  | chr12 | 80329029 | 80334856 | + | 2  | 1.87347 | 2.29988 | 2.27304 | 0.554154  | 1.60114   | 1.4469   | 3.74921  | 2.01036   | 1.1271    |
| TCONS_00063280    | XLOC_006329       | -             | anti-sense_lincRNA | 1324  | chr12 | 80848469 | 80852600 | - | 3  | 1.54241 | 0.63024 | 3.61038 | 1.1397    | 3.45334   | 5.07373  | 0.208675 | 1.07704   | 0.463281  |
| TCONS_00062490    | XLOC_005655       | -             | anti-sense_lincRNA | 1340  | chr12 | 81653343 | 81657188 | + | 2  | 3.48891 | 2.54754 | 4.41846 | 0.168551  | 1.24296   | 0.679333 | 0.977151 | 1.27416   | 0.558257  |
| TCONS_00070151    | XLOC_006346       | -             | lincRNA            | 298   | chr12 | 89489327 | 89588356 | - | 4  | 0       | 0       | 0       | 4.59435   | 2.60898   | 2.17798  | 0        | 0         | 0         |
| ENST00000605233.1 | ENSG00000270344.1 | RP11-734K2.4  | anti-sense_lincRNA | 338   | chr12 | 89919431 | 89934079 | + | 2  | 8.00103 | 4.23452 | 6.41221 | 4.68457   | 3.69123   | 1.03443  | 3.20083  | 3.09117   | 4.7624    |
| TCONS_00070755    | XLOC_005672       | -             | anti-sense_lincRNA | 2252  | chr12 | 89954071 | 89988364 | + | 2  | 2.18915 | 0.93586 | 1.94879 | 1.0366    | 1.34225   | 1.80404  | 1.40358  | 2.76716   | 1.42438   |
| ENST00000552778.1 | ENSG00000258302.1 | RP11-981P6.1  | anti-sense_lincRNA | 854   | chr12 | 89954906 | 89987798 | + | 2  | 2.1784  | 0.63404 | 2.54394 | 0.0750427 | 1.53143   | 0.902329 | 2.85951  | 0.171289  | 0.831915  |
| TCONS_00076970    | XLOC_005673       | -             | lincRNA            | 415   | chr12 | 90460844 | 90494747 | + | 3  | 1.41132 | 0.33623 | 0       | 0         | 0         | 0        | 0.856681 | 1.94418   | 0         |
| ENST00000499685.2 | ENSG00000245904.2 | RP11-796E2.4  | lincRNA            | 5699  | chr12 | 92539957 | 92583436 | + | 3  | 0.53863 | 0.24382 | 0.73337 | 0.418761  | 0.613757  | 0.370615 | 0.1903   | 0.568605  | 0.524018  |
| TCONS_00068025    | XLOC_006359       | -             | lincRNA            | 768   | chr12 | 92751076 | 92757759 | - | 2  | 0.71684 | 0.37594 | 1.24137 | 0.338853  | 0.763089  | 0.62118  | 0.521712 | 1.71912   | 0.511801  |
| TCONS_00073620    | XLOC_005677       | -             | lincRNA            | 858   | chr12 | 92950804 | 92977315 | + | 2  | 0.33532 | 0       | 0.47972 | 0.180392  | 5.24E-06  | 0.154478 | 0.252527 | 0.698698  | 1.11971   |
| TCONS_00067519    | XLOC_005677       | -             | lincRNA            | 1112  | chr12 | 92950804 | 93023381 | + | 2  | 0       | 0.43212 | 0.29494 | 0.139605  | 0.0939652 | 5.20E-06 | 0.546219 | 0.384944  | 1.88577   |
| TCONS_00065893    | XLOC_006360       | -             | lincRNA            | 296   | chr12 | 93368826 | 93370166 | - | 2  | 2.05773 | 2.28548 | 0       | 0.669507  | 0         | 0        | 1.33981  | 0         | 0         |
| TCONS_            |                   |               |                    |       |       |          |          |   |    |         |         |         |           |           |          |          |           |           |

|                   |                   |               |                    |      |       |           |           |   |   |         |         |         |           |           |           |           |           |           |
|-------------------|-------------------|---------------|--------------------|------|-------|-----------|-----------|---|---|---------|---------|---------|-----------|-----------|-----------|-----------|-----------|-----------|
| TCONS_00067562    | XLOC_005719       | -             | lincRNA            | 271  | chr12 | 102698417 | 102709241 | + | 2 | 0       | 0       | 1.04393 | 0         | 1.77836   | 0         | 0         | 2.41919   | 0.833167  |
| TCONS_00067580    | XLOC_005739       | -             | lincRNA            | 315  | chr12 | 105789372 | 105791090 | + | 2 | 0       | 0       | 1.93735 | 0.561452  | 0.555566  | 0.620469  | 2.21908   | 0.747476  | 0         |
| TCONS_00071845    | XLOC_005742       | -             | lincRNA            | 829  | chr12 | 106155981 | 106157314 | + | 2 | 0.32378 | 0.22611 | 0       | 0.305893  | 1.67186   | 2.57917   | 1.03428   | 0.504107  | 0.738761  |
| TCONS_00063384    | XLOC_006412       | -             | lincRNA            | 2109 | chr12 | 106404369 | 106453538 | - | 2 | 1.22965 | 1.66652 | 2.1189  | 1.47528   | 2.12568   | 1.62122   | 0.672765  | 2.14873   | 1.54258   |
| TCONS_00070847    | XLOC_005757       | -             | lincRNA            | 1130 | chr12 | 109028967 | 109030444 | + | 2 | 0.21923 | 0.53374 | 0.67821 | 11.7123   | 1.19375   | 4.31729   | 0.568748  | 1.91251   | 2.5534    |
| TCONS_00064168    | XLOC_005770       | -             | anti-sense_lincRNA | 405  | chr12 | 110418757 | 110421591 | + | 2 | 2.46602 | 1.41209 | 3.53503 | 0.314988  | 0.922125  | 0.693943  | 5.4052    | 2.86038   | 14.137    |
| TCONS_00063456    | XLOC_006471       | -             | lincRNA            | 838  | chr12 | 115765288 | 115787820 | - | 4 | 2.07497 | 0.78012 | 0.77229 | 0.603131  | 0.581669  | 0.773845  | 0.0926738 | 0.509237  | 0.364124  |
| TCONS_00078133    | XLOC_006473       | -             | lincRNA            | 712  | chr12 | 115946028 | 116201272 | - | 2 | 2.30221 | 1.00689 | 1.20389 | 2.54738   | 1.12877   | 0.72816   | 0.193686  | 1.39032   | 0.562027  |
| TCONS_00075737    | XLOC_006473       | -             | lincRNA            | 4288 | chr12 | 116171718 | 116201257 | - | 2 | 11.4766 | 1.60182 | 4.25916 | 4.20455   | 6.01666   | 3.24478   | 1.84064   | 2.55629   | 0.734126  |
| TCONS_00065988    | XLOC_006494       | -             | lincRNA            | 458  | chr12 | 118555546 | 118573787 | - | 3 | 4.71288 | 3.34884 | 2.22784 | 1.99719   | 3.15777   | 0.825016  | 0.707303  | 0.32175   | 0.456041  |
| TCONS_00065458    | XLOC_005833       | -             | lincRNA            | 276  | chr12 | 122115091 | 122127014 | + | 2 | 0       | 2.85779 | 0.97835 | 0.833956  | 0.834464  | 1.8478    | 0         | 0         | 0         |
| TCONS_00062744    | XLOC_005859       | -             | anti-sense_lincRNA | 1122 | chr12 | 124427894 | 124430006 | + | 2 | 3.2063  | 0.61531 | 0.76017 | 0.208485  | 0.334493  | 0.84041   | 0.828748  | 0.613861  | 1.06797   |
| TCONS_00066046    | XLOC_006542       | -             | intronic_lincRNA   | 321  | chr12 | 124558259 | 124560407 | - | 2 | 0       | 1.81465 | 0.61268 | 0         | 0         | 0         | 0         | 0         | 0         |
| TCONS_00069851    | XLOC_005861       | -             | intronic_lincRNA   | 307  | chr12 | 124665443 | 124683619 | + | 2 | 0       | 0       | 0.69552 | 0.602634  | 0         | 0         | 0         | 2.41554   | 0         |
| TCONS_00065499    | XLOC_005869       | -             | intronic_lincRNA   | 483  | chr12 | 125999765 | 126000504 | + | 2 | 3.22487 | 0.50791 | 0       | 0.227455  | 0.66307   | 0         | 0.428093  | 1.16958   | 1.03743   |
| TCONS_00067684    | XLOC_005882       | -             | intronic_lincRNA   | 4283 | chr12 | 128867163 | 128871500 | + | 2 | 1.05048 | 1.00275 | 3.22036 | 0.0470046 | 0.0451039 | 0.0344294 | 0.0427486 | 0.275064  | 0.0705996 |
| TCONS_00085982    | XLOC_006859       | -             | lincRNA            | 1025 | chr13 | 19778616  | 19783565  | - | 3 | 4.69406 | 1.80635 | 2.38142 | 1.70907   | 1.57119   | 2.98943   | 1.42713   | 2.74744   | 3.09134   |
| TCONS_00081814    | XLOC_006593       | -             | lincRNA            | 2037 | chr13 | 20437904  | 20527251  | + | 3 | 2.05557 | 1.77052 | 2.27829 | 1.81191   | 2.54399   | 1.56997   | 1.84363   | 1.92684   | 1.57179   |
| TCONS_00079749    | XLOC_006603       | -             | lincRNA            | 861  | chr13 | 22386822  | 22388382  | + | 2 | 2.31116 | 0.32261 | 0.42575 | 0.0970141 | 0.561254  | 0         | 0.0893892 | 0.491264  | 0         |
| ENST00000439928.2 | ENSG00000228741.2 | RP11-309115.1 | lincRNA            | 1721 | chr13 | 24553949  | 24609166  | + | 5 | 5.46936 | 3.79306 | 3.05647 | 0.667059  | 1.12285   | 1.08901   | 1.07902   | 0.759146  | 2.34544   |
| TCONS_00084423    | XLOC_006611       | -             | lincRNA            | 1055 | chr13 | 24553965  | 24608365  | + | 4 | 3.03581 | 1.53136 | 2.8236  | 0.910875  | 1.02806   | 1.93321   | 1.99102   | 1.29299   | 2.72888   |
| TCONS_00082000    | XLOC_006892       | -             | lincRNA            | 883  | chr13 | 27819764  | 27825415  | - | 2 | 9.09691 | 5.09814 | 8.9578  | 3.94298   | 5.15873   | 5.57484   | 8.04061   | 9.02921   | 7.73357   |
| TCONS_00080937    | XLOC_006644       | -             | lincRNA            | 746  | chr13 | 30221828  | 30229918  | + | 2 | 1.86403 | 1.43454 | 1.42142 | 0.822626  | 0         | 1.03413   | 0.651849  | 1.64046   | 2.02401   |
| TCONS_00082944    | XLOC_006914       | -             | lincRNA            | 370  | chr13 | 34238014  | 34250923  | - | 2 | 1.18614 | 4.27661 | 4.29733 | 1.52006   | 2.6076    | 5.03021   | 5.85968   | 1.49086   | 2.79689   |
| TCONS_00085334    | XLOC_006918       | -             | lincRNA            | 685  | chr13 | 36735787  | 36738413  | - | 2 | 0.20974 | 0.441   | 0       | 0         | 0.127889  | 0         | 0.367962  | 0.673028  | 1.08072   |
| TCONS_00081870    | XLOC_006669       | -             | lincRNA            | 425  | chr13 | 37848157  | 37938461  | + | 3 | 0.00214 | 0       | 2.56719 | 1.71926   | 2.23492   | 0.0018079 | 0.0019822 | 1.85424   | 0.0035647 |
| TCONS_00083624    | XLOC_006669       | -             | lincRNA            | 1244 | chr13 | 37880730  | 37925065  | + | 2 | 0.39067 | 0.13576 | 0.20118 | 0.613596  | 1.00365   | 0.809407  | 0         | 0.154709  | 0.0554412 |
| TCONS_00084725    | XLOC_006669       | -             | lincRNA            | 416  | chr13 | 37881456  | 37938450  | + | 2 | 0.46606 | 0       | 0       | 0         | 0.0003266 | 4.60512   | 1.1346    | 8.46E-05  | 0.269746  |
| TCONS_00079822    | XLOC_006671       | -             | anti-sense_lincRNA | 5405 | chr13 | 38205904  | 38216518  | + | 2 | 1.56977 | 0.81348 | 0.82831 | 0.884846  | 1.28513   | 1.37721   | 0.569709  | 0.60078   | 0.442919  |
| TCONS_00084988    | XLOC_006927       | -             | lincRNA            | 1667 | chr13 | 38627950  | 38629703  | - | 2 | 1.25185 | 0.96467 | 1.71382 | 0.916526  | 1.55211   | 2.68616   | 1.23598   | 1.64722   | 1.69396   |
| TCONS_00083628    | XLOC_006677       | -             | lincRNA            | 2822 | chr13 | 40746442  | 40766339  | + | 5 | 0.40066 | 0       | 0.34554 | 0.0976195 | 1.32597   | 2.78E-06  | 0.259319  | 0.932226  | 3.88304   |
| TCONS_00080971    | XLOC_006677       | -             | lincRNA            | 2669 | chr13 | 40746513  | 40765821  | + | 5 | 0.49485 | 2.44602 | 0.28197 | 0         | 1.10369   | 0.142397  | 0.397222  | 0.916391  | 0.896028  |
| TCONS_00080972    | XLOC_006677       | -             | lincRNA            | 1517 | chr13 | 40754864  | 40763406  | + | 4 | 0.83201 | 2.17798 | 0.63678 | 0.0486226 | 0.937614  | 0.160323  | 0.77831   | 1.67745   | 3.34492   |
| TCONS_00080974    | XLOC_006680       | -             | lincRNA            | 1970 | chr13 | 41707083  | 41751147  | + | 4 | 2.73293 | 1.71997 | 2.00923 | 0.753416  | 1.74084   | 1.38356   | 1.25576   | 1.61159   | 1.06554   |
| TCONS_00080437    | XLOC_006680       | -             | lincRNA            | 1245 | chr13 | 41737088  | 41737458  | + | 3 | 1.52213 | 0.94585 | 0.87259 | 0.807157  | 1.05555   | 1.09084   | 0.390002  | 0.119614  | 0.683721  |
| TCONS_00085224    | XLOC_006685       | -             | lincRNA            | 827  | chr13 | 42062513  | 42066930  | + | 3 | 0.32481 | 0.45367 | 0.44916 | 0.204581  | 0         | 0         | 0.188663  | 0.907035  | 0.926423  |
| TCONS_00081883    | XLOC_006685       | -             | lincRNA            | 415  | chr13 | 42062517  | 42080479  | + | 2 | 0       | 0.33623 | 0.67283 | 0.899925  | 0         | 0         | 0.856681  | 0.777672  | 2.47289   |
| TCONS_00081181    | XLOC_006945       | -             | lincRNA            | 3392 | chr13 | 43313376  | 43321686  | - | 3 | 18.5217 | 6.79732 | 9.72448 | 1.34133   | 2.60372   | 3.69538   | 3.91811   | 1.9499    | 2.90558   |
| TCONS_00082561    | XLOC_006945       | -             | lincRNA            | 4801 | chr13 | 43313376  | 43321686  | - | 5 | 0       | 0.83664 | 1.06467 | 2.83E-05  | 0.607148  | 0         | 0.346063  | 0         | 1.06007   |
| TCONS_00082559    | XLOC_006945       | -             | lincRNA            | 3219 | chr13 | 43313377  | 43321591  | - | 4 | 2.43701 | 0.28265 | 1.23414 | 0.470722  | 1.32757   | 0.0003526 | 0.950746  | 1.25341   | 0.0003766 |
| TCONS_00082560    | XLOC_006945       | -             | lincRNA            | 3226 | chr13 | 43313377  | 43321591  | - | 4 | 2.71655 | 2.12354 | 3.1379  | 0.196933  | 0         | 1.14005   | 0.708199  | 9.01E-05  | 0.750788  |
| TCONS_00081893    | XLOC_006697       | -             | lincRNA            | 5183 | chr13 | 44495494  | 44521419  | + | 2 | 5.73886 | 3.68231 | 3.90769 | 0.616188  | 1.52719   | 1.4668    | 3.956     | 2.17245   | 3.14618   |
| TCONS_00080459    | XLOC_006697       | -             | lincRNA            | 1752 | chr13 | 44612467  | 44620660  | + | 4 | 5.86058 | 2.35018 | 2.91006 | 0.672179  | 0.906363  | 0.772477  | 2.50444   | 1.67047   | 2.03883   |
| TCONS_00081896    | XLOC_006697       | -             | lincRNA            | 1492 | chr13 | 44612483  | 44617434  | + | 2 | 5.24932 | 2.63336 | 1.99904 | 0.547892  | 0.903542  | 1.27461   | 1.54665   | 1.48895   | 1.82333   |
| TCONS_00081895    | XLOC_006697       | -             | lincRNA            | 2735 | chr13 | 44612483  | 44617434  | + | 3 | 0.04023 | 0.10683 | 0.51736 | 2.43E-05  | 0.279078  | 0.0004768 | 0.645734  | 0.113364  | 1.7959    |
| TCONS_00079878    | XLOC_006712       | -             | intronic_lincRNA   | 3633 | chr13 | 46825416  | 46831907  | + | 3 | 3.71801 | 1.29574 | 2.16925 | 0.354092  | 0.482922  | 0.286673  | 1.28873   | 1.748083  | 0.722301  |
| TCONS_00082976    | XLOC_006966       | -             | lincRNA            | 537  | chr13 | 46887219  | 46891482  | - | 2 | 0.60255 | 0.42522 | 0.95701 | 0.724779  | 0         | 0.285093  | 0.644442  | 1.43194   | 0         |
| TCONS_00082059    | XLOC_006966       | -             | lincRNA            | 994  | chr13 | 46890480  | 46895857  | - | 2 | 0.64169 | 0.62579 | 0.83767 | 0.177719  | 0.155521  | 0.50084   | 0.399842  | 0.217988  | 1.16832   |
| TCONS_00082846    | XLOC_006718       | -             | lincRNA            | 225  | chr13 | 49155332  | 49173591  | + | 2 | 0       | 0       | 0       | 1.88777   | 0         | 0         | 0         | 0         | 1.80487   |
| TCONS_00081904    | XLOC_006719       | -             | lincRNA            | 506  | chr13 | 49227869  | 49267727  | + | 3 | 0.6171  | 0.00044 | 1.30066 | 1.37289   | 1.9465    | 0.940731  | 0.34937   | 0.0004486 | 1.95777   |
| TCONS_00083653    | XLOC_006719       | -             | lincRNA            | 529  | chr13 | 49227869  | 49267727  | + | 3 | 0       | 0.46859 | 0       | 7.14379   | 1.78244   | 1.3031    | 0.807209  | 1.0785    | 0.0001177 |
| TCONS_00082069    | XLOC_006987       | -             | lincRNA            | 233  | chr13 | 50948754  | 50961192  | - | 2 | 2.39078 | 0       | 3.88961 | 0         | 1.63625   | 0         | 0         | 2.25692   | 1.52997   |
| TCONS_00081918    | XLOC_006727       | -             | lincRNA            | 287  | chr13 | 50964225  | 50989308  | + | 2 | 1.12673 | 1.67647 | 3.42885 | 0.7354    | 0         | 0.814037  | 2.22267   | 0.992828  | 0.687349  |
| TCONS_00081919    | XLOC_006731       | -             | intronic_lincRNA   | 1259 | chr13 | 51289401  | 51338990  | + | 3 | 1.2347  | 0.86986 | 1.3701  | 0.544399  | 0.477567  | 0.411371  | 0.567036  | 1.74016   | 1.28722   |
| TCONS_00079905    | XLOC_006731       | -             | intronic_lincRNA   | 646  | chr13 | 51331826  | 51382958  | + | 3 | 1.81646 | 0.71439 | 0.5196  | 0         | 0.841132  | 0.287262  | 0.721317  | 0.438605  | 0.414456  |
| TCONS_00079906    | XLOC_006731       | -             | intronic_lincRNA   | 1033 | chr13 | 51382032  | 51383617  | + | 2 | 0.75975 | 0.81228 | 0.92648 | 0.692433  | 0.500299  | 0.338357  | 1.01541   | 1.53381   | 1.27162   |
| ENST00000601286.1 | ENSG00000233672.2 | RNASEH2B-AS1  | lincRNA            | 657  | chr13 | 51456688  | 51479292  | - | 3 | 0.22254 | 0.15612 | 0.61951 | 0.561996  | 0.271646  | 1.08209   | 0.391117  | 0.893902  | 0.637637  |
| TCONS_00082084    | XLOC_007001       | -             | lincRNA            | 284  | chr13 | 53171335  | 53174540  | - | 2 | 1.1633  | 0       | 2.66244 | 0         | 1.51703   | 0         | 0.767624  | 0         | 0.711041  |
| TCONS_00084037    | XLOC_006761       | -             | lincRNA            | 5365 | chr13 | 74184978  | 74210526  | + | 3 | 0.63277 | 0.49187 | 0.44429 | 0.173386  | 0.855477  | 0.353773  | 2.0376    | 2.09576   | 1.19399   |
| TCONS_00081039    | XLOC_006763       | -             | lincRNA            | 1604 | chr13 | 74861940  | 74981226  | + | 5 | 0       | 1.53793 | 1.03829 | 0         | 0.263317  | 0.0936955 | 0.192523  | 0         | 0.33272   |
| TCONS_00081038    | XLOC_006763       | -             | lincRNA            | 1643 | chr13 | 74861940  | 74981226  | + |   |         |         |         |           |           |           |           |           |           |

|                   |                   |               |                    |      |       |           |           |   |   |         |         |         |           |           |           |           |           |           |
|-------------------|-------------------|---------------|--------------------|------|-------|-----------|-----------|---|---|---------|---------|---------|-----------|-----------|-----------|-----------|-----------|-----------|
| TCONS_00085261    | XLOC_006763       | -             | lincRNA            | 1347 | chr13 | 74862009  | 74981149  | + | 5 | 2.66613 | 0.75864 | 1.45624 | 0.273716  | 1.03427   | 0         | 1.42937   | 0.654738  | 0         |
| TCONS_00080533    | XLOC_006763       | -             | lincRNA            | 417  | chr13 | 74862189  | 74906337  | + | 2 | 0       | 0       | 1.20771 | 0.0070968 | 0         | 0.327539  | 0         | 1.45653   | 1.08869   |
| TCONS_00081468    | XLOC_006763       | -             | lincRNA            | 2852 | chr13 | 74862197  | 74982904  | + | 4 | 0.01486 | 0.00744 | 1.14735 | 0         | 0.0016218 | 0.70319   | 0.230949  | 0.658807  | 1.36683   |
| TCONS_00079934    | XLOC_006763       | -             | lincRNA            | 3002 | chr13 | 74930154  | 74983084  | + | 3 | 0.5895  | 0.9052  | 0       | 0         | 0         | 5.17E-05  | 0         | 4.96E-05  | 0         |
| TCONS_00081929    | XLOC_006763       | -             | lincRNA            | 2687 | chr13 | 74973382  | 74982904  | + | 3 | 2.623   | 2.17627 | 3.90777 | 0.0004992 | 1.11099   | 0.0671606 | 1.70877   | 1.07108   | 0.0815243 |
| TCONS_00079935    | XLOC_006763       | -             | lincRNA            | 3083 | chr13 | 74973856  | 74983084  | + | 2 | 1.67211 | 0       | 0.27628 | 0.422908  | 0         | 0.176329  | 0         | 0         | 0.431676  |
| TCONS_00082662    | XLOC_007016       | -             | anti-sense_lincRNA | 1556 | chr13 | 76191609  | 76209950  | - | 2 | 2.18171 | 2.24449 | 2.47337 | 1.32221   | 1.45271   | 1.24563   | 1.20857   | 1.01036   | 0.895282  |
| TCONS_00083824    | XLOC_007022       | -             | lincRNA            | 297  | chr13 | 77548016  | 77550877  | - | 2 | 0       | 0       | 0       | 0         | 1.31782   | 0         | 0         | 0.890022  | 0         |
| TCONS_00080835    | XLOC_007024       | -             | intronic_lincRNA   | 1968 | chr13 | 77863245  | 77866665  | - | 2 | 1.78936 | 1.31988 | 3.03848 | 1.37582   | 1.77399   | 2.70563   | 1.28839   | 2.82161   | 3.23399   |
| TCONS_00081246    | XLOC_007034       | -             | lincRNA            | 883  | chr13 | 80766730  | 80792753  | - | 6 | 3.22006 | 1.7583  | 3.13198 | 0.38852   | 0.426913  | 0.31042   | 1.50086   | 0.435048  | 1.16244   |
| TCONS_00081245    | XLOC_007034       | -             | lincRNA            | 980  | chr13 | 80766730  | 80792753  | - | 5 | 0.02079 | 0.69839 | 0       | 0.0001925 | 0.851322  | 0.0002279 | 1.73731   | 0.0002105 | 0         |
| TCONS_00086618    | XLOC_007034       | -             | lincRNA            | 1506 | chr13 | 80773784  | 80786906  | - | 4 | 3.20377 | 1.52845 | 2.07096 | 0.148514  | 0.888362  | 0.281216  | 0.809867  | 0.456118  | 1.83122   |
| TCONS_00081762    | XLOC_007034       | -             | lincRNA            | 839  | chr13 | 80774098  | 80792861  | - | 4 | 2.58069 | 0.30828 | 1.48776 | 0.626393  | 0.421712  | 0.810615  | 0.0001917 | 1.07019   | 0         |
| TCONS_00081763    | XLOC_007034       | -             | lincRNA            | 1092 | chr13 | 80807155  | 80810304  | - | 2 | 1.25699 | 0.63613 | 1.88637 | 0.215512  | 0.553303  | 0.39489   | 1.31846   | 1.0881    | 0.389686  |
| TCONS_00081934    | XLOC_006775       | -             | lincRNA            | 277  | chr13 | 81388670  | 81398019  | + | 2 | 1.25776 | 1.88213 | 2.89832 | 1.64804   | 0.824236  | 0.912821  | 1.67429   | 2.23847   | 3.8624    |
| ENST00000438290.2 | ENSG00000227640.2 | SOX21-AS1     | anti-sense_lincRNA | 3287 | chr13 | 95364970  | 95368500  | + | 2 | 5.9536  | 1.25822 | 6.06652 | 1.90684   | 6.58505   | 3.66655   | 4.20691   | 4.525     | 3.75545   |
| TCONS_00080250    | XLOC_007046       | -             | lincRNA            | 545  | chr13 | 95468725  | 95598264  | - | 3 | 3.53198 | 0.62281 | 0       | 0         | 0.180651  | 0         | 0.174218  | 0.953683  | 0.678403  |
| TCONS_00084625    | XLOC_007048       | -             | intronic_lincRNA   | 1705 | chr13 | 96147992  | 96186172  | - | 3 | 0.81353 | 0.32924 | 0       | 0         | 0.408965  | 4.48837   | 0.272052  | 0.695659  | 0.460753  |
| TCONS_00080565    | XLOC_006800       | -             | lincRNA            | 1748 | chr13 | 99229507  | 99231788  | + | 2 | 3.29567 | 1.78232 | 2.07464 | 1.19937   | 1.94755   | 0.863606  | 1.73731   | 1.5605    | 1.41838   |
| TCONS_00081266    | XLOC_007060       | -             | lincRNA            | 1632 | chr13 | 100146731 | 100148679 | - | 2 | 2.49357 | 0.74125 | 4.24359 | 0.849533  | 1.24637   | 1.86738   | 2.20606   | 2.86916   | 3.14816   |
| TCONS_00081060    | XLOC_006805       | -             | lincRNA            | 539  | chr13 | 100152765 | 100153537 | + | 2 | 0       | 0.63401 | 0       | 0.379353  | 1.10341   | 0.208806  | 0         | 0.728275  | 0.517956  |
| TCONS_00086074    | XLOC_007073       | -             | lincRNA            | 330  | chr13 | 103931352 | 103931996 | - | 2 | 0.77079 | 0       | 0       | 0         | 0         | 0         | 0         | 0         | 0.92033   |
| TCONS_00081526    | XLOC_006821       | -             | lincRNA            | 2703 | chr13 | 108895675 | 108905451 | + | 2 | 3.26289 | 1.89113 | 2.2266  | 1.89189   | 1.69372   | 3.03401   | 2.04934   | 3.14541   | 1.75201   |
| TCONS_00083850    | XLOC_007080       | -             | lincRNA            | 387  | chr13 | 110212491 | 110223460 | - | 2 | 0       | 0       | 0.38903 | 0         | 1.01333   | 0.380696  | 1.65488   | 0.449785  | 0         |
| TCONS_00081968    | XLOC_006851       | -             | lincRNA            | 474  | chr13 | 114518962 | 114519663 | + | 3 | 0.73999 | 1.04984 | 1.30849 | 1.40985   | 0.913728  | 1.55281   | 0.22139   | 0.906978  | 1.0722    |
| TCONS_00080015    | XLOC_006854       | -             | lincRNA            | 1778 | chr13 | 114973938 | 114988307 | + | 3 | 3.16844 | 2.01729 | 3.36214 | 0.567986  | 1.01367   | 1.96185   | 2.37082   | 1.98986   | 2.48973   |
| TCONS_00095028    | XLOC_007110       | -             | lincRNA            | 562  | chr14 | 20905875  | 20907382  | + | 2 | 0       | 0.39542 | 0       | 0.177563  | 0         | 0         | 0.994547  | 0.007727  | 0.323027  |
| TCONS_00093117    | XLOC_007585       | -             | lincRNA            | 467  | chr14 | 21465930  | 21467355  | - | 2 | 0.37961 | 0.80843 | 0.80636 | 0.482355  | 1.17273   | 0.265649  | 0         | 0.310528  | 1.10088   |
| TCONS_00088992    | XLOC_007137       | -             | lincRNA            | 464  | chr14 | 22265410  | 22266000  | + | 2 | 0.38389 | 2.99861 | 0.27194 | 1.21968   | 0.474537  | 0         | 0.230163  | 0.628362  | 1.78185   |
| TCONS_00089639    | XLOC_007141       | -             | lincRNA            | 1598 | chr14 | 22319778  | 22323206  | + | 5 | 0.43785 | 1.36683 | 0.8495  | 0.82442   | 0.616389  | 0.302034  | 0.418552  | 2.30542   | 1.48848   |
| TCONS_00090361    | XLOC_007145       | -             | lincRNA            | 453  | chr14 | 22371012  | 22371572  | + | 2 | 0       | 0.8541  | 0.28417 | 0.763852  | 0.991246  | 0.280493  | 0.24065   | 0.328341  | 1.39574   |
| TCONS_00087175    | XLOC_007140       | -             | lincRNA            | 1251 | chr14 | 22445778  | 22447129  | + | 2 | 0.67914 | 0.33712 | 0.26643 | 0.18285   | 0.117286  | 0.134     | 0.167503  | 0.230504  | 0.93619   |
| TCONS_00096046    | XLOC_007163       | -             | lincRNA            | 427  | chr14 | 22670471  | 22671481  | + | 2 | 0       | 0.31806 | 0.31797 | 0         | 0.276884  | 0         | 0         | 0         | 1.29951   |
| TCONS_00090639    | XLOC_007595       | -             | lincRNA            | 237  | chr14 | 23025206  | 23025711  | - | 2 | 0       | 1.71126 | 3.59564 | 0         | 0         | 0         | 0         | 2.08594   | 0         |
| TCONS_00092887    | XLOC_007178       | -             | lincRNA            | 644  | chr14 | 23451909  | 23452977  | + | 2 | 1.60313 | 0.80372 | 0.47851 | 0.433891  | 1.25866   | 0.477411  | 0.805774  | 0.368254  | 0.656542  |
| TCONS_00089021    | XLOC_007187       | -             | lincRNA            | 526  | chr14 | 24058510  | 24088733  | + | 3 | 1.86824 | 2.85877 | 1.53178 | 0.986417  | 0.191364  | 0.868796  | 0.554265  | 0.505439  | 0         |
| TCONS_00093357    | XLOC_007210       | -             | anti-sense_lincRNA | 543  | chr14 | 24914735  | 24977661  | + | 3 | 0.88811 | 0.6265  | 3.32318 | 0.374905  | 1.45377   | 0.206353  | 0.70108   | 0.479699  | 2.72969   |
| TCONS_00096660    | XLOC_007657       | -             | lincRNA            | 2486 | chr14 | 28971027  | 29082977  | - | 5 | 0.8551  | 0.56585 | 1.63573 | 0.766574  | 1.32202   | 2.55775   | 2.60973   | 2.63217   | 2.16774   |
| TCONS_00095793    | XLOC_007657       | -             | lincRNA            | 4651 | chr14 | 29035565  | 29082867  | - | 3 | 1.60403 | 0.831   | 1.86775 | 0.499992  | 1.59786   | 2.30151   | 2.49606   | 3.04618   | 2.01775   |
| ENST00000549742.1 | ENSG00000258175.1 | RP11-412H8.2  | lincRNA            | 665  | chr14 | 29061429  | 29082829  | - | 3 | 8.29868 | 2.03876 | 8.49448 | 4.94695   | 6.53297   | 11.5608   | 16.226    | 14.241    | 9.18983   |
| TCONS_00087753    | XLOC_007659       | -             | lincRNA            | 5536 | chr14 | 29191417  | 29200769  | - | 3 | 2.75624 | 0.67447 | 2.05894 | 0.539447  | 1.95508   | 0.513645  | 0.708233  | 1.11191   | 0.540042  |
| TCONS_00088173    | XLOC_007212       | -             | lincRNA            | 459  | chr14 | 29233521  | 29235255  | + | 2 | 3.12989 | 1.11188 | 1.94158 | 0.497357  | 0.96779   | 1.09573   | 0.939259  | 0.320463  | 0.454243  |
| TCONS_00091663    | XLOC_007218       | -             | lincRNA            | 502  | chr14 | 32019852  | 32027250  | + | 2 | 0       | 0.71308 | 0.23673 | 0.852232  | 0.206858  | 0.469212  | 1.00018   | 0.820289  | 1.74775   |
| TCONS_00092910    | XLOC_007220       | -             | lincRNA            | 630  | chr14 | 32476091  | 32496930  | + | 2 | 0.94575 | 0.49813 | 0.16481 | 0         | 1.01126   | 0.657399  | 1.24915   | 0.380509  | 0.271279  |
| TCONS_00096063    | XLOC_007224       | -             | intronic_lincRNA   | 1272 | chr14 | 33585590  | 33587337  | + | 2 | 2.75855 | 1.98289 | 2.48111 | 0.597539  | 0.459904  | 0.788214  | 0.437835  | 1.95822   | 0.97174   |
| TCONS_00095073    | XLOC_007227       | -             | lincRNA            | 593  | chr14 | 34420438  | 34422155  | + | 2 | 2.58558 | 0.1819  | 0       | 0.163489  | 0.158265  | 0         | 0         | 1.8774    | 0.594368  |
| TCONS_00089398    | XLOC_007674       | -             | lincRNA            | 508  | chr14 | 35020932  | 35024358  | - | 2 | 4.61009 | 4.23072 | 2.11974 | 1.62711   | 2.46652   | 1.56551   | 3.73587   | 1.64264   | 1.73183   |
| TCONS_00089399    | XLOC_007674       | -             | lincRNA            | 519  | chr14 | 35020932  | 35024358  | - | 2 | 0.00202 | 3.11165 | 0.64053 | 2.86536   | 0.750255  | 0.708937  | 1.12205   | 2.55054   | 2.00224   |
| TCONS_00090407    | XLOC_007241       | -             | intronic_lincRNA   | 2432 | chr14 | 37405397  | 37407961  | + | 2 | 1.18907 | 0.91818 | 1.12411 | 0.573461  | 0.770972  | 0.819199  | 0.470357  | 1.08028   | 0.491317  |
| TCONS_00090690    | XLOC_007690       | -             | anti-sense_lincRNA | 461  | chr14 | 37967395  | 37970027  | - | 2 | 4.65917 | 3.03377 | 1.9262  | 0.24676   | 1.20027   | 1.63089   | 2.09639   | 1.27168   | 1.80276   |
| TCONS_00087803    | XLOC_007695       | -             | lincRNA            | 1761 | chr14 | 39229871  | 39232380  | - | 2 | 2.15705 | 0.58914 | 0.80502 | 2.13267   | 1.4583    | 2.25369   | 0.636661  | 1.44427   | 0.740275  |
| TCONS_00091683    | XLOC_007251       | -             | lincRNA            | 1700 | chr14 | 39901833  | 39941174  | + | 2 | 1.56445 | 1.22638 | 1.16382 | 0.981703  | 1.88704   | 1.50112   | 0.662761  | 2.04029   | 1.30984   |
| TCONS_00089077    | XLOC_007253       | -             | lincRNA            | 988  | chr14 | 40124062  | 40125612  | + | 2 | 1.42243 | 0.72067 | 0.8018  | 1.13878   | 0.940285  | 1.52041   | 1.04662   | 1.02785   | 0.809381  |
| TCONS_00095311    | XLOC_007699       | -             | lincRNA            | 5854 | chr14 | 42052940  | 42075160  | - | 3 | 2.08648 | 1.65272 | 1.91035 | 0.48647   | 0.379974  | 0.793866  | 1.97808   | 1.47207   | 0.740202  |
| ENST00000557067.1 | ENSG00000258636.1 | CTD-2298J14.2 | lincRNA            | 530  | chr14 | 42057064  | 42074059  | - | 2 | 5.07522 | 2.94825 | 4.03064 | 0         | 0.753941  | 0.885953  | 3.94288   | 0.793985  | 0.244801  |
| TCONS_00090431    | XLOC_007275       | -             | lincRNA            | 898  | chr14 | 51411790  | 51413971  | + | 2 | 1.16748 | 0.50895 | 0.40289 | 0.459288  | 0.708346  | 0.404044  | 0.507406  | 0.581089  | 0.914577  |
| TCONS_00094073    | XLOC_007293       | -             | lincRNA            | 297  | chr14 | 53629470  | 53635105  | + | 2 | 0       | 1.21206 | 1.08571 | 0         | 0         | 0.733256  | 2.65109   | 0         | 3.34E-05  |
| TCONS_00091702    | XLOC_007293       | -             | lincRNA            | 350  | chr14 | 53632507  | 53635105  | + | 2 | 0.67053 | 0.67705 | 1.26732 | 1.72374   | 0         | 0         | 1.67367   | 0.566567  | 0.795013  |
| TCONS_00090723    | XLOC_007738       | -             | lincRNA            | 409  | chr14 | 54259966  | 54316699  | - | 2 | 0.62665 | 1.15205 | 3.07449 | 0.007013  | 0         | 0.680427  | 0         | 2.40285   | 1.31445   |
| TCONS_00091970    | XLOC_007738       | -             | lincRNA            | 373  | chr14 | 54316513  | 54317609  | - | 2 | 1.57671 | 1.12216 | 0.89713 | 2.23182   | 2.92704   | 0.411842  | 0         | 0         | 1.83811   |
| TCONS_00090728    | XLOC_007743       | -             | anti-sense_lincRNA | 350  | chr14 | 55242685  | 55248124  | - | 3 | 0       | 0.48612 | 1.46939 | 0         | 0         | 0         | 0         |           |           |

|                     |             |                |                    |      |       |           |           |   |    |         |         |         |           |           |          |          |           |           |
|---------------------|-------------|----------------|--------------------|------|-------|-----------|-----------|---|----|---------|---------|---------|-----------|-----------|----------|----------|-----------|-----------|
| TCONS_00089120      | XLOC_007315 | -              | lincRNA            | 724  | chr14 | 59357142  | 59361487  | + | 2  | 0.97098 | 0.13595 | 0.13474 | 0.367409  | 0.473066  | 1.07776  | 0        | 0.155507  | 0.444189  |
| TCONS_00092641      | XLOC_007763 | -              | lincRNA            | 1842 | chr14 | 59921860  | 59928206  | - | 4  | 5.71733 | 5.16908 | 5.44066 | 2.41721   | 2.39761   | 3.81336  | 1.85066  | 2.4511    | 2.70899   |
| ENST00000557618.1   | XLOC_007763 | RP11-1042B17.3 | lincRNA            | 868  | chr14 | 60981837  | 61021634  | + | 2  | 2.74442 | 1.91519 | 0.94776 | 0.0959946 | 0.74043   | 0.738956 | 0.265306 | 0.243022  | 0.955995  |
| TCONS_00091732      | XLOC_007329 | -              | lincRNA            | 4862 | chr14 | 61580080  | 61585241  | + | 2  | 1.55536 | 0.66612 | 0.64151 | 0.933062  | 1.51399   | 1.79399  | 0.973067 | 1.03215   | 0.729488  |
| TCONS_00094299      | XLOC_007775 | -              | lincRNA            | 788  | chr14 | 62060563  | 62065991  | - | 3  | 0.17314 | 0.24202 | 0       | 1.74555   | 0.105269  | 2.15985  | 0        | 0.138309  | 0.0988454 |
| TCONS_00090166      | XLOC_007807 | -              | intronic_lincRNA   | 1367 | chr14 | 68549240  | 68555361  | - | 2  | 2.18483 | 1.82072 | 1.07886 | 0.109764  | 0.158356  | 0.120651 | 1.00453  | 0.414815  | 0.247849  |
| ENST00000556301.1   | XLOC_007807 | CTD-2325P2.4   | lincRNA            | 279  | chr14 | 69093883  | 69095162  | - | 2  | 11.0643 | 13.7811 | 6.59686 | 2.41435   | 4.0222    | 4.45685  | 16.3236  | 4.3669    | 6.78578   |
| TCONS_00087932      | XLOC_007810 | -              | lincRNA            | 4484 | chr14 | 69157944  | 69190851  | - | 3  | 2.83939 | 1.05079 | 2.0965  | 0.714003  | 0.742505  | 0.501049 | 0.325668 | 0.673843  | 0.414589  |
| TCONS_00087931      | XLOC_007810 | -              | lincRNA            | 3501 | chr14 | 69158874  | 69190793  | - | 3  | 2.65682 | 1.18133 | 1.00978 | 0.371854  | 0.691623  | 0.499614 | 0.000299 | 0.0002685 | 0.178036  |
| ENST00000500016.1   | XLOC_007810 | CTD-2540L5.6   | lincRNA            | 2941 | chr14 | 71075515  | 71108015  | - | 3  | 2.1976  | 0.48963 | 2.92724 | 0.280136  | 1.18778   | 1.05169  | 1.57301  | 0.93759   | 1.28387   |
| TCONS_00092991      | XLOC_007374 | -              | lincRNA            | 2346 | chr14 | 71165101  | 71180393  | + | 3  | 0.57077 | 0.0988  | 0.3573  | 0.328052  | 1.77574   | 0.589891 | 0.462127 | 0.486963  | 0.780033  |
| TCONS_00094118      | XLOC_007376 | -              | lincRNA            | 378  | chr14 | 71288652  | 71290726  | + | 2  | 0       | 0.81596 | 0.40958 | 0.725657  | 0.710655  | 1.60062  | 1.04629  | 0.473599  | 1.00047   |
| TCONS_00092334      | XLOC_007378 | -              | lincRNA            | 3590 | chr14 | 71787141  | 71952187  | + | 5  | 5.5724  | 2.8327  | 4.10623 | 3.01967   | 3.85812   | 4.79014  | 2.74766  | 2.62792   | 3.32311   |
| TCONS_00087978      | XLOC_007860 | -              | lincRNA            | 1263 | chr14 | 77539917  | 77552808  | - | 3  | 1.97522 | 0.63231 | 0.73204 | 0.293859  | 0.548094  | 0.865352 | 0.442157 | 0.342278  | 1.03981   |
| TCONS_00089517      | XLOC_007860 | -              | lincRNA            | 1401 | chr14 | 77539936  | 77542842  | - | 2  | 0.20458 | 0.93736 | 0.98307 | 0.539845  | 0.130589  | 0.46519  | 0.145856 | 0.637644  | 0.139743  |
| TCONS_00087998      | XLOC_007876 | -              | anti-sense_lincRNA | 4580 | chr14 | 81557725  | 81567855  | - | 3  | 1.8653  | 0.84407 | 1.53092 | 0.569608  | 0.896886  | 1.23916  | 0.460469 | 1.04306   | 0.701718  |
| TCONS_00089527      | XLOC_007876 | -              | anti-sense_lincRNA | 1048 | chr14 | 81560558  | 81566679  | - | 2  | 0       | 0.38672 | 0.3807  | 0         | 0         | 0.812465 | 0.022746 | 0.194754  | 0.0467313 |
| TCONS_00088846      | XLOC_007878 | -              | lincRNA            | 1066 | chr14 | 81892621  | 81893774  | - | 2  | 2.82465 | 0.90111 | 1.29572 | 1.10998   | 1.85258   | 1.54577  | 0.679304 | 0.747415  | 0.936741  |
| TCONS_00093032      | XLOC_007433 | -              | intronic_lincRNA   | 3472 | chr14 | 86016939  | 86028756  | + | 2  | 17.4757 | 12.0854 | 8.57326 | 8.21267   | 4.16641   | 5.82243  | 4.05714  | 6.01014   | 2.57334   |
| TCONS_00088447      | XLOC_007434 | -              | lincRNA            | 1060 | chr14 | 86400912  | 86446079  | + | 2  | 1.42216 | 0.82494 | 3.01748 | 1.26678   | 0.932795  | 1.63851  | 1.36822  | 3.01075   | 2.82996   |
| TCONS_00091128      | XLOC_007434 | -              | lincRNA            | 1938 | chr14 | 86499427  | 86508620  | + | 5  | 0.76332 | 0.69171 | 1.92698 | 0.478809  | 0.601571  | 0.526195 | 0.974689 | 2.17608   | 1.82777   |
| TCONS_00091521      | XLOC_007896 | -              | intronic_lincRNA   | 2529 | chr14 | 91844764  | 91867545  | - | 2  | 1.31491 | 1.57766 | 2.62394 | 1.29145   | 1.7678    | 2.29473  | 1.35199  | 2.44976   | 3.22129   |
| TCONS_00090835      | XLOC_007904 | -              | lincRNA            | 580  | chr14 | 92975780  | 92977848  | - | 2  | 0.80212 | 0.37642 | 0.374   | 1.01466   | 0.163762  | 0        | 1.10356  | 1.29549   | 0.461251  |
| TCONS_00089588      | XLOC_007927 | -              | lincRNA            | 583  | chr14 | 95792719  | 95794299  | - | 2  | 0       | 0.74685 | 0       | 0.167779  | 0         | 0.184656 | 0        | 0.214181  | 1.0677    |
| TCONS_00087575      | XLOC_007492 | -              | lincRNA            | 3315 | chr14 | 97196752  | 97204417  | + | 2  | 2.75339 | 0.7708  | 0.31288 | 0.0410802 | 0.0197153 | 0.18055  | 0.243033 | 0.257713  | 0.185156  |
| TCONS_00089269      | XLOC_007515 | -              | lincRNA            | 3324 | chr14 | 101437149 | 101455234 | + | 10 | 2.65212 | 3.20185 | 1.72029 | 2.53418   | 1.709     | 2.10632  | 3.236    | 2.83143   | 1.01828   |
| TCONS_00089270      | XLOC_007515 | -              | lincRNA            | 2664 | chr14 | 101440913 | 101451371 | + | 4  | 1.98272 | 2.96365 | 2.19984 | 2.11057   | 1.94663   | 1.40979  | 4.24437  | 1.9503    | 0.745757  |
| TCONS_00087599      | XLOC_007516 | -              | lincRNA            | 1794 | chr14 | 101505067 | 101507077 | + | 2  | 0.64014 | 0.9763  | 0.78826 | 1.12456   | 0.964869  | 0.48553  | 1.17342  | 0.707096  | 0.543672  |
| TCONS_00095210      | XLOC_007519 | -              | lincRNA            | 1723 | chr14 | 101520725 | 101522540 | + | 2  | 1.00491 | 0.74326 | 0.55015 | 1.30316   | 0.646411  | 0.462003 | 2.0732   | 1.42765   | 0.607051  |
| ENST00000557121.1   | XLOC_007519 | RP11-8L8.2     | lincRNA            | 943  | chr14 | 101587193 | 101589879 | + | 2  | 0.82273 | 0.76464 | 0       | 0.776521  | 0.249418  | 0.284615 | 0.555529 | 0.10909   | 0.85877   |
| ENST00000553561.1   | XLOC_007519 | RP11-168L7.1   | lincRNA            | 447  | chr14 | 101798853 | 101800668 | - | 2  | 0.41007 | 0       | 0.29132 | 0.521693  | 0.507933  | 0        | 0.493564 | 0.336614  | 0.238399  |
| TCONS_00093308      | XLOC_007947 | -              | lincRNA            | 563  | chr14 | 101821341 | 101822769 | - | 3  | 0.27982 | 1.97155 | 0.39195 | 1.94778   | 2.05862   | 0.584708 | 2.47928  | 0.678871  | 1.28849   |
| TCONS_00090281      | XLOC_007950 | -              | lincRNA            | 1557 | chr14 | 102023240 | 102026574 | - | 3  | 0.29466 | 1.10763 | 0.88559 | 0.939763  | 0.73507   | 0.502373 | 0.809427 | 0.43196   | 0.309265  |
| ENST00000555882.1   | XLOC_007950 | DIO3OS         | lincRNA            | 789  | chr14 | 102024890 | 102026643 | - | 2  | 0.3596  | 1.66278 | 0.81368 | 2.07848   | 0.188743  | 0.396905 | 1.73272  | 1.06681   | 0.665118  |
| TCONS_00087603      | XLOC_007522 | -              | intronic_lincRNA   | 5281 | chr14 | 102287820 | 102293232 | + | 2  | 3.93976 | 3.764   | 5.88517 | 5.90457   | 3.84093   | 6.39025  | 2.78091  | 5.09737   | 6.26161   |
| ENST00000559675.1   | XLOC_007522 | RP11-661D19.3  | lincRNA            | 567  | chr14 | 103236377 | 103241128 | - | 2  | 1.93753 | 2.53467 | 5.8136  | 0.875656  | 0.848265  | 1.34934  | 1.96108  | 1.56632   | 0.955677  |
| TCONS_00094187      | XLOC_007541 | -              | lincRNA            | 707  | chr14 | 104343607 | 104346121 | + | 2  | 0.60204 | 0.56221 | 1.39335 | 0.126592  | 0.489107  | 1.11408  | 1.17202  | 1.28655   | 0.918494  |
| TCONS_00089632      | XLOC_007983 | -              | lincRNA            | 344  | chr14 | 106963048 | 106963476 | - | 2  | 0.69782 | 5.06826 | 3.57791 | 38.6081   | 0         | 0.991114 | 0        | 0.591309  | 2.48697   |
| TCONS_00097909      | XLOC_008011 | -              | lincRNA            | 385  | chr15 | 24698879  | 24700428  | + | 2  | 3.27417 | 0.78433 | 0       | 0         | 0.683053  | 1.53943  | 0.334772 | 0.909741  | 0         |
| TCONS_00107062      | XLOC_008016 | -              | lincRNA            | 3449 | chr15 | 25299167  | 25305309  | + | 3  | 2.13707 | 2.12994 | 1.19978 | 1.16186   | 1.24745   | 1.62279  | 1.5412   | 0.889392  | 1.66856   |
| TCONS_00102872      | XLOC_008020 | -              | lincRNA            | 252  | chr15 | 25512032  | 25513567  | + | 2  | 1.74461 | 0       | 0       | 3.47054   | 0         | 0        | 1.20454  | 0         | 0         |
| TCONS_00104430      | XLOC_008454 | -              | lincRNA            | 241  | chr15 | 29126972  | 29129701  | - | 2  | 0       | 0       | 0       | 0         | 0         | 0        | 0        | 0         | 1.31663   |
| TCONS_00099390      | XLOC_008458 | -              | anti-sense_lincRNA | 1020 | chr15 | 30906651  | 30918180  | - | 2  | 4.34977 | 3.98106 | 4.62106 | 2.11031   | 3.7639    | 1.46089  | 4.23608  | 3.06057   | 2.33274   |
| TCONS_00102054      | XLOC_008042 | -              | lincRNA            | 1546 | chr15 | 30916661  | 30918316  | + | 2  | 0.45474 | 0.73622 | 1.14212 | 0.428161  | 0.640302  | 0.522875 | 0.608815 | 0.479021  | 0.300654  |
| TCONS_00105914      | XLOC_008051 | -              | lincRNA            | 481  | chr15 | 32828970  | 32878382  | + | 3  | 2.52594 | 2.81377 | 2.80472 | 0.916337  | 2.00365   | 3.53215  | 1.94072  | 2.94545   | 1.67194   |
| TCONS_00102455      | XLOC_008470 | -              | anti-sense_lincRNA | 965  | chr15 | 32896154  | 32907597  | - | 2  | 1.59827 | 1.67061 | 1.83597 | 0.754134  | 1.21096   | 1.19774  | 1.84902  | 1.90645   | 1.44036   |
| TCONS_00105041      | XLOC_008474 | -              | anti-sense_lincRNA | 360  | chr15 | 34145246  | 34147113  | - | 2  | 6.29456 | 2.73035 | 3.20489 | 1.2117    | 3.56804   | 4.01078  | 3.12505  | 5.82484   | 1.86028   |
| TCONS_00097964      | XLOC_008064 | -              | intronic_lincRNA   | 2688 | chr15 | 36952219  | 36954958  | + | 2  | 3.56977 | 1.24944 | 2.46408 | 1.85186   | 3.03749   | 2.82622  | 1.07774  | 1.96971   | 1.29876   |
| TCONS_00104707      | XLOC_008067 | -              | lincRNA            | 555  | chr15 | 38285601  | 38317349  | + | 2  | 3.59973 | 3.85876 | 2.9806  | 0.464322  | 1.49839   | 1.725    | 0.935414 | 1.61681   | 1.68308   |
| TCONS_00104709      | XLOC_008067 | -              | lincRNA            | 861  | chr15 | 38312216  | 38317180  | + | 3  | 4.94619 | 3.16688 | 5.2977  | 0.75706   | 2.60653   | 1.10114  | 2.68736  | 3.14449   | 2.62887   |
| TCONS_00106634      | XLOC_008067 | -              | lincRNA            | 5143 | chr15 | 38312243  | 38358395  | + | 5  | 6.43393 | 3.97412 | 5.5548  | 0.487296  | 1.69915   | 1.9994   | 3.8707   | 0.911064  | 1.76042   |
| TCONS_00104212      | XLOC_008067 | -              | lincRNA            | 4944 | chr15 | 38351498  | 38358621  | + | 2  | 1.01013 | 0.28366 | 0.99018 | 0.539066  | 0.540043  | 0.109639 | 0.678966 | 0.511421  | 0.678986  |
| ENST00000565315.1   | XLOC_008067 | RP11-532F12.5  | anti-sense_lincRNA | 629  | chr15 | 41128006  | 41136530  | - | 2  | 2.26069 | 2.91885 | 2.42589 | 0         | 1.88762   | 1.33145  | 3.41279  | 1.61802   | 0.96814   |
| ENST00000564302.1   | XLOC_008067 | RP11-532F12.5  | anti-sense_lincRNA | 643  | chr15 | 41128191  | 41136585  | - | 3  | 6.53268 | 7.969   | 5.64591 | 2.60925   | 8.82581   | 6.5263   | 12.0433  | 8.95403   | 7.4858    |
| TCONS_00098521      | XLOC_008556 | -              | lincRNA            | 734  | chr15 | 43941370  | 43956641  | - | 2  | 3.43034 | 1.73386 | 1.05738 | 0.961346  | 2.0885    | 1.18966  | 0.666836 | 1.52544   | 0.871566  |
| TCONS_00103444      | XLOC_008124 | -              | lincRNA            | 1958 | chr15 | 45021189  | 45025159  | + | 2  | 18.2275 | 16.1702 | 37.3846 | 21.3739   | 14.8327   | 17.7268  | 33.3579  | 37.8519   | 51.1191   |
| TCONS_00100289      | XLOC_008568 | -              | lincRNA            | 523  | chr15 | 45139700  | 45174832  | - | 4  | 0.33183 | 3.11398 | 0.82819 | 0.199126  | 0         | 0.178306 | 0        | 0.305117  | 1.01176   |
| TCONS_00100290      | XLOC_008568 | -              | lincRNA            | 3396 | chr15 | 45170890  | 45174997  | - | 2  | 0.28575 | 0.59595 | 1.50835 | 0.440423  | 0.230576  | 0.268062 | 0.382604 | 0.422055  | 0.747463  |
| TCONS_00101818      | XLOC_008575 | -              | lincRNA            | 455  | chr15 | 45689184  | 45694404  | - | 3  | 0.39732 | 0.28242 | 1.97308 | 0.505213  | 0.983302  | 0        | 0.954693 | 0.977016  | 2.30761   |
| ENST00000560359.1</ |             |                |                    |      |       |           |           |   |    |         |         |         |           |           |          |          |           |           |



|                   |                   |                |                    |      |       |           |           |   |   |         |          |         |           |          |           |           |           |           |
|-------------------|-------------------|----------------|--------------------|------|-------|-----------|-----------|---|---|---------|----------|---------|-----------|----------|-----------|-----------|-----------|-----------|
| TCONS_00102179    | XLOC_008177       | -              | anti-sense_lincRNA | 2024 | chr15 | 60771364  | 60822442  | + | 3 | 1.62259 | 0.46522  | 1.68271 | 0.701941  | 1.21366  | 1.2727    | 1.63275   | 1.85251   | 1.89963   |
| TCONS_00099997    | XLOC_008185       | -              | lincRNA            | 692  | chr15 | 63724294  | 63729556  | + | 2 | 1.86095 | 1.0142   | 1.00562 | 0.652329  | 2.14282  | 3.30117   | 3.86768   | 4.64287   | 2.9588    |
| TCONS_00102981    | XLOC_008215       | -              | lincRNA            | 326  | chr15 | 68805107  | 68828063  | + | 2 | 0.79445 | 0        | 0.58746 | 1.53874   | 0        | 0         | 1.00734   | 1.35964   | 1.42514   |
| TCONS_00102986    | XLOC_008227       | -              | lincRNA            | 458  | chr15 | 69760308  | 69760845  | + | 2 | 3.85912 | 2.82684  | 0.33494 | 1.25223   | 1.4208   | 0.458268  | 0.735429  | 0         | 0.549837  |
| TCONS_00099136    | XLOC_008227       | -              | lincRNA            | 1282 | chr15 | 69760335  | 69819241  | + | 3 | 2.18402 | 0.64635  | 1.79804 | 0.295059  | 0.578129 | 0.607393  | 0.589916  | 0.149228  | 0.78026   |
| ENST00000558411.1 | ENSG00000259641.1 | RP11-279F6.3   | lincRNA            | 2121 | chr15 | 69884468  | 69905229  | + | 2 | 1.54075 | 0.51522  | 1.52475 | 0.0999581 | 0.28805  | 0.109846  | 0.121552  | 0.293073  | 0.33063   |
| TCONS_00106985    | XLOC_008695       | -              | intronic_lincRNA   | 899  | chr15 | 71773541  | 71816749  | - | 3 | 2.47735 | 2.13451  | 1.60922 | 0.917258  | 0.176831 | 0.201732  | 1.09778   | 0.696295  | 0.664188  |
| TCONS_00106990    | XLOC_008697       | -              | intronic_lincRNA   | 1037 | chr15 | 72464848  | 72466087  | - | 2 | 1.82642 | 4.32355  | 2.26309 | 0.918822  | 0.737386 | 0.926022  | 1.75796   | 0.676902  | 0.484707  |
| TCONS_00104597    | XLOC_008714       | -              | intronic_lincRNA   | 660  | chr15 | 74603796  | 74612016  | - | 2 | 1.10545 | 0.77543  | 0.46155 | 0         | 1.34926  | 1.84284   | 2.97848   | 0.710361  | 1.7736    |
| ENST00000560590.1 | ENSG00000259420.1 | RP11-307C19.2  | lincRNA            | 702  | chr15 | 77861312  | 77865206  | + | 3 | 0.58195 | 0.61906  | 0.91935 | 0         | 0.741764 | 0.790703  | 0.0016567 | 1.67229   | 0.414936  |
| TCONS_00106752    | XLOC_008274       | -              | lincRNA            | 1312 | chr15 | 77864559  | 77865989  | + | 2 | 0.74546 | 0.48669  | 0.72163 | 0.0576009 | 0.276728 | 0.657122  | 1.10676   | 0.63191   | 0.230093  |
| TCONS_00098802    | XLOC_008733       | -              | intronic_lincRNA   | 251  | chr15 | 77910847  | 77911471  | - | 2 | 5.31266 | 0        | 0       | 0         | 2.37475  | 0         | 0         | 0         | 2.22308   |
| TCONS_00103332    | XLOC_008749       | -              | lincRNA            | 1106 | chr15 | 79657532  | 79665223  | - | 2 | 0.67506 | 0.23484  | 0.30949 | 2.61682   | 2.04262  | 0.466524  | 0.194672  | 0.267778  | 0.0639378 |
| TCONS_00100472    | XLOC_008755       | -              | lincRNA            | 255  | chr15 | 80672279  | 80690323  | - | 2 | 0       | 5.06931  | 0       | 0         | 0        | 1.22683   | 1.14718   | 3.04986   | 3.13216   |
| TCONS_00100473    | XLOC_008756       | -              | intronic_lincRNA   | 265  | chr15 | 80772754  | 80773325  | - | 2 | 1.45646 | 2.19591  | 0       | 0         | 0        | 0         | 0         | 0         | 0         |
| TCONS_00104623    | XLOC_008762       | -              | lincRNA            | 399  | chr15 | 82245682  | 82246961  | - | 2 | 2.0312  | 0.36393  | 0.36461 | 0         | 0.316886 | 0.357499  | 0         | 0         | 1.18973   |
| TCONS_00098842    | XLOC_008796       | -              | lincRNA            | 1332 | chr15 | 85857352  | 85873776  | - | 2 | 1.08108 | 1.18895  | 2.6576  | 1.13163   | 0.97966  | 0.808535  | 1.13952   | 2.70906   | 2.0444    |
| TCONS_00103064    | XLOC_008347       | -              | lincRNA            | 3208 | chr15 | 89177992  | 89181665  | + | 2 | 0.95042 | 1.05654  | 1.78225 | 1.02102   | 1.1434   | 1.28547   | 1.02621   | 1.62814   | 1.45733   |
| ENST00000558221.1 | ENSG00000259704.1 | CTD-3094K11.1  | lincRNA            | 402  | chr15 | 91382954  | 91384608  | + | 2 | 0       | 0.35839  | 0.71194 | 0.958289  | 0        | 1.40853   | 1.52503   | 0.414959  | 0.878709  |
| TCONS_00104659    | XLOC_008827       | -              | lincRNA            | 582  | chr15 | 92011920  | 92012975  | - | 2 | 0.53197 | 0        | 0.186   | 6.22416   | 2.44337  | 0.74057   | 0.313598  | 0.214756  | 0.305867  |
| TCONS_00103086    | XLOC_008381       | -              | lincRNA            | 1173 | chr15 | 92127669  | 92148997  | + | 2 | 1.36214 | 1.23861  | 0.93595 | 0.921837  | 1.01394  | 0.579085  | 0.543298  | 0.913589  | 1.7853    |
| TCONS_00103092    | XLOC_008390       | -              | lincRNA            | 259  | chr15 | 94039526  | 94041973  | + | 2 | 1.57817 | 0        | 0       | 1.04249   | 1.04992  | 1.15665   | 0         | 0         | 0         |
| TCONS_00105654    | XLOC_008400       | -              | lincRNA            | 3521 | chr15 | 96533669  | 96651700  | + | 2 | 0.73792 | 0.25515  | 0.08384 | 0.866939  | 1.20187  | 1.92626   | 0.210372  | 0.604205  | 0.191017  |
| TCONS_00099824    | XLOC_008845       | -              | lincRNA            | 1110 | chr15 | 96644942  | 96647885  | - | 2 | 2.57638 | 1.16901  | 1.23246 | 0.774548  | 0.813435 | 0.464468  | 0.581416  | 1.24408   | 0.509241  |
| ENST00000558382.1 | ENSG00000259275.1 | RP11-522B15.3  | lincRNA            | 501  | chr15 | 96897466  | 96946964  | + | 2 | 0       | 0.71549  | 0.23754 | 0.21377   | 0.622674 | 0.941567  | 0.401454  | 0         | 0.779405  |
| TCONS_00107865    | XLOC_008401       | -              | lincRNA            | 1201 | chr15 | 96897681  | 96938675  | + | 2 | 2.85194 | 1.98269  | 1.46925 | 1.024     | 1.35495  | 1.61818   | 1.05583   | 1.8563    | 0.983213  |
| TCONS_00098356    | XLOC_008412       | -              | lincRNA            | 243  | chr15 | 99993576  | 99994296  | + | 2 | 2.00823 | 0        | 0       | 0         | 0        | 1.48812   | 0         | 0         | 1.27082   |
| TCONS_00099322    | XLOC_008416       | -              | lincRNA            | 1832 | chr15 | 100417086 | 100422445 | + | 2 | 3.25131 | 1.17019  | 1.83898 | 1.37293   | 1.0554   | 0         | 1.03847   | 1.38107   | 1.06194   |
| TCONS_00100530    | XLOC_008871       | -              | intronic_lincRNA   | 326  | chr15 | 101051848 | 101052549 | - | 2 | 4.76671 | 1.1612   | 0       | 0         | 0        | 0.566553  | 0.503671  | 0         | 0         |
| TCONS_00114568    | XLOC_008916       | -              | anti-sense_lincRNA | 241  | chr16 | 824683    | 825035    | + | 2 | 0       | 0        | 0       | 1.38626   | 0        | 1.54083   | 0         | 0         | 0         |
| TCONS_00114903    | XLOC_009466       | -              | anti-sense_lincRNA | 298  | chr16 | 1259482   | 1260062   | - | 2 | 0       | 0.74656  | 0       | 0         | 0.652244 | 0         | 0         | 1.76161   | 0.611644  |
| ENST00000574387.1 | ENSG00000262370.1 | RP11-473M20.9  | lincRNA            | 677  | chr16 | 3128321   | 3137088   | - | 3 | 1.27948 | 2.84041  | 3.55831 | 4.84505   | 3.38155  | 4.29395   | 3.61816   | 2.05362   | 3.41929   |
| ENST00000573447.1 | ENSG00000263072.1 | RP11-473M20.14 | lincRNA            | 1117 | chr16 | 3178834   | 3182043   | - | 2 | 4.5577  | 2.3974   | 3.74533 | 1.9565    | 2.28703  | 2.53502   | 2.62818   | 2.64533   | 1.89499   |
| TCONS_00118472    | XLOC_008976       | -              | lincRNA            | 1010 | chr16 | 3661794   | 3691511   | + | 2 | 1.50971 | 2.97909  | 1.55957 | 2.69031   | 1.52428  | 2.95797   | 0.94507   | 1.99922   | 2.86271   |
| ENST00000573220.1 | ENSG00000263105.1 | RP11-95P2.3    | lincRNA            | 318  | chr16 | 4230118   | 4233516   | - | 2 | 0       | 0        | 0.62882 | 0         | 0.541259 | 0         | 1.07979   | 0         | 0         |
| TCONS_00111719    | XLOC_009004       | -              | lincRNA            | 1390 | chr16 | 9583911   | 9611977   | + | 3 | 1.11419 | 1.30927  | 0.41139 | 0.161458  | 0.10352  | 0.059157  | 0.443213  | 0.203367  | 0.0972147 |
| TCONS_00111274    | XLOC_009559       | -              | lincRNA            | 1004 | chr16 | 10608258  | 10619987  | - | 2 | 2.66166 | 1.05934  | 0.61108 | 0.797186  | 1.38216  | 1.22711   | 0.146497  | 1.9136    | 0.865268  |
| TCONS_00116191    | XLOC_009562       | -              | lincRNA            | 371  | chr16 | 10827125  | 10836088  | - | 2 | 0.58966 | 0.4251   | 0.42711 | 0.377779  | 1.11083  | 0         | 0         | 0         | 1.04254   |
| TCONS_00111728    | XLOC_009010       | -              | lincRNA            | 1129 | chr16 | 11406760  | 11411091  | + | 2 | 0.32919 | 1.06863  | 1.20702 | 0.896616  | 0.663914 | 0.0758236 | 1.01221   | 1.21838   | 1.43394   |
| TCONS_00117233    | XLOC_009569       | -              | lincRNA            | 323  | chr16 | 11487324  | 11490597  | - | 2 | 0       | 0.59494  | 1.20469 | 0         | 0.518915 | 1.74103   | 0         | 0.697091  | 0         |
| TCONS_00114959    | XLOC_009573       | -              | lincRNA            | 225  | chr16 | 11524908  | 11529564  | - | 2 | 2.79276 | 4.33915  | 0       | 0         | 1.93169  | 2.10158   | 0         | 0         | 0         |
| TCONS_00112232    | XLOC_009588       | -              | lincRNA            | 3307 | chr16 | 14100973  | 14110078  | - | 4 | 14.7009 | 4.70291  | 8.09774 | 1.28882   | 5.44584  | 4.23658   | 5.22355   | 6.75803   | 5.39791   |
| ENST00000575424.1 | ENSG00000262097.1 | CTD-2135D7.5   | lincRNA            | 760  | chr16 | 14103137  | 14109873  | - | 3 | 3.75483 | 3.31644  | 4.35737 | 1.76609   | 2.37605  | 1.48241   | 2.99694   | 3.55278   | 3.24142   |
| TCONS_00110341    | XLOC_009596       | -              | lincRNA            | 291  | chr16 | 15224555  | 15225140  | - | 2 | 8.64941 | 6.42098  | 4.09825 | 3.52347   | 2.10513  | 0         | 3.53872   | 1.89846   | 3.94751   |
| TCONS_00110343    | XLOC_009597       | -              | lincRNA            | 211  | chr16 | 15226806  | 15227218  | - | 2 | 7.63867 | 6.00337  | 6.46865 | 0         | 0        | 0         | 2.8642    | 3.7552    | 2.51662   |
| ENST00000576433.1 | ENSG00000261465.2 | RP11-626G11.5  | anti-sense_lincRNA | 455  | chr16 | 19074076  | 19078717  | - | 3 | 0       | 2.37318  | 1.61691 | 0.252607  | 1.47495  | 0         | 0.50691   | 0         | 1.2974    |
| TCONS_00110367    | XLOC_009615       | -              | anti-sense_lincRNA | 575  | chr16 | 19074161  | 19075644  | - | 2 | 2.16735 | 0.68615  | 0.23952 | 0         | 0        | 0         | 0.178489  | 1.53206   | 0.838016  |
| TCONS_00110368    | XLOC_009617       | -              | lincRNA            | 1164 | chr16 | 19313379  | 19316732  | - | 2 | 3.70145 | 1.61796  | 2.18023 | 0.199384  | 1.1514   | 1.24208   | 2.07186   | 1.42522   | 1.32151   |
| TCONS_00111326    | XLOC_009618       | -              | lincRNA            | 2490 | chr16 | 19377493  | 19405235  | - | 3 | 3.14811 | 2.4992   | 3.95618 | 0.0001971 | 0.864768 | 1.29713   | 1.13495   | 0.758443  | 2.2231    |
| TCONS_00118275    | XLOC_009618       | -              | lincRNA            | 2278 | chr16 | 19377569  | 19405344  | - | 2 | 0.00845 | 3.81E-05 | 0       | 0         | 0.644359 | 1.19337   | 0.883211  | 1.968     | 0.907329  |
| TCONS_00110369    | XLOC_009618       | -              | lincRNA            | 2403 | chr16 | 19377608  | 19405401  | - | 3 | 3.20436 | 0        | 0.2446  | 0.221711  | 8.90E-05 | 4.01E-05  | 0         | 0.0002096 | 0         |
| TCONS_00118767    | XLOC_009618       | -              | lincRNA            | 931  | chr16 | 19392586  | 19405355  | - | 2 | 3.35152 | 0.97232  | 3.1974  | 0.119363  | 1.01325  | 0.241048  | 3.79038   | 1.94263   | 2.70848   |
| TCONS_00114649    | XLOC_009051       | -              | anti-sense_lincRNA | 3848 | chr16 | 20685842  | 20694024  | + | 2 | 1.34362 | 0.56125  | 1.18269 | 2.75339   | 2.3394   | 2.83253   | 0.59031   | 1.58373   | 0.979984  |
| TCONS_00111336    | XLOC_009628       | -              | anti-sense_lincRNA | 846  | chr16 | 20754577  | 20775447  | - | 2 | 3.46815 | 0.99048  | 3.05037 | 0.595689  | 0.670135 | 0.764232  | 1.09805   | 0.879972  | 1.07873   |
| TCONS_00109734    | XLOC_009055       | -              | lincRNA            | 1108 | chr16 | 21327479  | 21358496  | + | 3 | 2.69431 | 1.09349  | 1.158   | 0.917396  | 1.63048  | 1.62923   | 1.74814   | 2.76088   | 1.6587    |
| TCONS_00114674    | XLOC_009087       | -              | lincRNA            | 372  | chr16 | 24838913  | 24841196  | + | 2 | 0       | 2.11283  | 0.42451 | 2.25341   | 0        | 0.828522  | 0.361704  | 0.490905  | 0.690877  |
| TCONS_00115614    | XLOC_009653       | -              | lincRNA            | 1420 | chr16 | 26604869  | 26606723  | + | 2 | 0.75243 | 0.29021  | 0.22926 | 0.787409  | 0        | 0.288496  | 0.384182  | 0.925529  | 1.56442   |
| ENST00000570025.1 | ENSG00000260083.1 | MIR4519        | anti-sense_lincRNA | 1429 | chr16 | 30886543  | 30906400  | + | 2 | 2.24079 | 1.90131  | 2.84458 | 0.885851  | 2.0044   | 1.43189   | 2.33571   | 0.294361  | 2.30584   |
| ENST00000570266.1 | ENSG00000260911.1 | RP11-196G11.2  | lincRNA            | 461  | chr16 | 31054471  | 31061201  | + | 2 | 0.77653 | 1.37899  | 2.47654 | 1.48056   | 0.480108 | 0.543629  | 0.465863  | 0         | 1.35207   |
| TCONS_00114410    | XLOC_009730       | -              | lincRNA            | 4688 | chr16 | 46397969  | 46408768  | - | 2 | 54.795  | 30.2267  | 12.2282 | 2.66544   | 6.11326  | 1.44075   | 9.24061   | 27.9677   | 10.879    |
| TCONS_00111412    | XLOC_009731       | -              | lincRNA            | 2716 | chr16 | 46419359  | 46434134  | - | 2 | 15.0535 | 9.4      |         |           |          |           |           |           |           |

|                   |                   |               |                    |      |       |          |          |   |   |         |         |         |           |           |           |           |           |           |
|-------------------|-------------------|---------------|--------------------|------|-------|----------|----------|---|---|---------|---------|---------|-----------|-----------|-----------|-----------|-----------|-----------|
| TCONS_00111413    | XLOC_009732       | -             | lincRNA            | 311  | chr16 | 46422518 | 46434873 | - | 2 | 22.4308 | 5.2777  | 2.67915 | 0         | 2.30318   | 0         | 0         | 0.775324  | 1.08018   |
| TCONS_00113777    | XLOC_009736       | -             | lincRNA            | 240  | chr16 | 46660866 | 46663519 | - | 2 | 0       | 1.62078 | 1.69891 | 0         | 1.43293   | 0         | 1.48899   | 0         | 4.02169   |
| TCONS_00110493    | XLOC_009751       | -             | lincRNA            | 435  | chr16 | 49035789 | 49036358 | - | 2 | 1.29241 | 0.30699 | 0.61349 | 0.274265  | 0         | 0         | 1.04012   | 0         | 5.01706   |
| ENST00000567728.1 | ENSG00000261644.1 | RP11-327F22.2 | lincRNA            | 1150 | chr16 | 50769624 | 50774627 | - | 2 | 0.42924 | 0.52244 | 0.22127 | 0.269771  | 0.194745  | 0.815572  | 0.18554   | 1.10609   | 0.609591  |
| ENST00000563315.1 | ENSG00000260929.1 | RP11-327F22.1 | anti-sense_lincRNA | 640  | chr16 | 50774821 | 50776726 | - | 2 | 0.23109 | 0.32445 | 0.16098 | 0.291901  | 0.282279  | 0.963554  | 0.406653  | 0.557511  | 0.795105  |
| TCONS_00111042    | XLOC_009189       | -             | lincRNA            | 1033 | chr16 | 51789166 | 51812234 | + | 4 | 0.24537 | 0       | 0.59766 | 0.470329  | 0.625386  | 0         | 0         | 0.0879386 | 0.190248  |
| TCONS_00119868    | XLOC_009189       | -             | lincRNA            | 1104 | chr16 | 51789166 | 51821520 | + | 5 | 2.62697 | 0.63823 | 2.23987 | 0         | 0.902867  | 1.40542   | 0.620788  | 0.297237  | 1.17514   |
| TCONS_00111043    | XLOC_009189       | -             | lincRNA            | 1295 | chr16 | 51789166 | 51812234 | + | 4 | 0.77083 | 1.95142 | 0.54998 | 0.133735  | 0.0707669 | 0         | 0.60149   | 0.874854  | 0.0074786 |
| TCONS_00111918    | XLOC_009189       | -             | lincRNA            | 1176 | chr16 | 51789212 | 51847935 | + | 5 | 3.85976 | 2.70652 | 4.86363 | 6.21E-06  | 1.73597   | 1.45359   | 1.81512   | 0.354668  | 1.06264   |
| TCONS_00116263    | XLOC_009763       | -             | lincRNA            | 261  | chr16 | 52197030 | 52215510 | - | 2 | 0       | 0       | 0       | 1.01337   | 2.03953   | 0         | 1.04524   | 1.3917    | 0         |
| TCONS_00111919    | XLOC_009191       | -             | intronic_lincRNA   | 1543 | chr16 | 53132482 | 53156055 | + | 2 | 0.9345  | 1.89257 | 0.9732  | 0.473874  | 1.40153   | 1.29157   | 0.192684  | 1.22718   | 1.41827   |
| TCONS_00111920    | XLOC_009191       | -             | intronic_lincRNA   | 1603 | chr16 | 53148828 | 53156456 | + | 2 | 2.66845 | 0.50902 | 1.20971 | 1.50884   | 1.46634   | 2.42539   | 1.44211   | 1.06537   | 1.81492   |
| ENST00000560029.1 | ENSG00000245694.4 | CRNDE         | lincRNA            | 659  | chr16 | 54952782 | 54954528 | - | 2 | 6.20395 | 8.54854 | 8.48047 | 6.85433   | 5.13851   | 7.07971   | 8.69585   | 6.94143   | 9.01451   |
| TCONS_00112347    | XLOC_009775       | -             | lincRNA            | 1695 | chr16 | 55477239 | 55479333 | - | 2 | 0.40948 | 0.99386 | 0.09342 | 0.0856513 | 0.123481  | 0.188269  | 0.352057  | 0.646469  | 0.502501  |
| TCONS_00116791    | XLOC_009782       | -             | lincRNA            | 1578 | chr16 | 56184737 | 56196432 | - | 2 | 1.33258 | 1.38674 | 0.96331 | 0.511135  | 0.848719  | 0.510709  | 0.721956  | 1.40346   | 0.46144   |
| TCONS_00109918    | XLOC_009212       | -             | lincRNA            | 509  | chr16 | 56697292 | 56698890 | + | 2 | 2.29868 | 0       | 0.92484 | 0         | 0.202086  | 0.229247  | 0.781296  | 0         | 0.758865  |
| TCONS_00118341    | XLOC_009807       | -             | lincRNA            | 724  | chr16 | 63101398 | 63124427 | - | 2 | 1.55357 | 0.27189 | 0.80843 | 0.12247   | 1.18266   | 0.40416   | 1.35972   | 1.08855   | 0.444189  |
| TCONS_00111462    | XLOC_009808       | -             | lincRNA            | 4988 | chr16 | 63334957 | 63652068 | - | 4 | 2.15372 | 0.53524 | 1.37894 | 0.607984  | 3.26931   | 1.24463   | 0.961669  | 1.56642   | 0.646748  |
| TCONS_00113068    | XLOC_009808       | -             | lincRNA            | 2249 | chr16 | 63366783 | 63651976 | - | 3 | 0.44981 | 0.36872 | 0.71685 | 0.327764  | 0.928507  | 0.281741  | 0.251318  | 1.19588   | 0.31771   |
| TCONS_00113819    | XLOC_009809       | -             | lincRNA            | 1583 | chr16 | 63440959 | 63442871 | - | 2 | 1.62283 | 0.51174 | 1.11135 | 0.370389  | 1.15719   | 0.712403  | 0.380818  | 1.1653    | 0.376171  |
| TCONS_00112371    | XLOC_009811       | -             | lincRNA            | 208  | chr16 | 64787221 | 64788542 | - | 2 | 0       | 3.24332 | 0       | 0         | 0         | 0         | 0         | 0         | 2.72483   |
| TCONS_00110552    | XLOC_009815       | -             | lincRNA            | 562  | chr16 | 65844703 | 65846680 | - | 2 | 1.68355 | 0.79083 | 0.58959 | 0.532688  | 1.20423   | 1.36811   | 0.663031  | 1.58852   | 0.161513  |
| TCONS_00119262    | XLOC_009816       | -             | lincRNA            | 447  | chr16 | 65952917 | 66167853 | - | 2 | 0       | 0       | 0       | 0.310262  | 0         | 0.287374  | 0.318258  | 3.27205   | 0         |
| TCONS_00117328    | XLOC_009816       | -             | lincRNA            | 4752 | chr16 | 66161466 | 66167951 | - | 2 | 0.44871 | 1.02335 | 0.32088 | 1.24807   | 1.01128   | 2.64025   | 1.63182   | 0.921112  | 0.15196   |
| TCONS_00110553    | XLOC_009819       | -             | lincRNA            | 262  | chr16 | 66280377 | 66300959 | - | 2 | 0       | 0       | 2.36655 | 0         | 0         | 0         | 0         | 0         | 0         |
| TCONS_00112378    | XLOC_009819       | -             | lincRNA            | 484  | chr16 | 66280377 | 66281993 | - | 2 | 0       | 0.75913 | 1.26099 | 0         | 0         | 0.998431  | 0         | 0.291332  | 0         |
| ENST00000499966.1 | ENSG00000246898.1 | LINC00920     | lincRNA            | 2147 | chr16 | 66442427 | 66446038 | + | 2 | 1.41535 | 0.7988  | 1.79083 | 0.98622   | 1.45254   | 0.794767  | 1.85874   | 3.13923   | 1.5717    |
| TCONS_00113466    | XLOC_009250       | -             | intronic_lincRNA   | 328  | chr16 | 66471640 | 66475941 | + | 2 | 1.56489 | 0.5714  | 2.31166 | 0         | 0.996546  | 0.557708  | 0.495324  | 0         | 0         |
| ENST00000602596.1 | ENSG00000270049.1 | RP11-297D21.4 | anti-sense_lincRNA | 696  | chr16 | 67515287 | 67518572 | + | 2 | 0.61534 | 1.72446 | 2.13722 | 1.16469   | 1.50024   | 1.13892   | 1.67812   | 1.31563   | 1.52603   |
| TCONS_00113881    | XLOC_009889       | -             | lincRNA            | 1524 | chr16 | 72276850 | 72383132 | - | 8 | 0.79465 | 0.28246 | 1.64014 | 0.665671  | 1.90692   | 1.36786   | 1.73161   | 1.88339   | 1.43772   |
| TCONS_00112443    | XLOC_009889       | -             | lincRNA            | 1166 | chr16 | 72277158 | 72342225 | - | 7 | 1.92416 | 1.95518 | 0.64732 | 1.06347   | 0.318543  | 0.87931   | 5.22E-05  | 0.0008617 | 0.861529  |
| TCONS_00111558    | XLOC_009889       | -             | lincRNA            | 577  | chr16 | 72283026 | 72324551 | - | 4 | 2.00883 | 0.20416 | 0.00011 | 0.0344027 | 0         | 0.226649  | 2.04033   | 1.31767   | 0.728944  |
| TCONS_00112445    | XLOC_009889       | -             | lincRNA            | 1441 | chr16 | 72555466 | 72698929 | - | 6 | 0.73972 | 1.14112 | 1.46477 | 0.980481  | 1.14134   | 1.6449    | 1.32166   | 1.42961   | 1.21162   |
| TCONS_00115104    | XLOC_009891       | -             | lincRNA            | 476  | chr16 | 73352171 | 73925643 | - | 4 | 0.53544 | 0.22975 | 0.71584 | 4.7088    | 1.09407   | 0.38889   | 0.0012532 | 1.40433   | 2.32914   |
| TCONS_00116334    | XLOC_009891       | -             | lincRNA            | 591  | chr16 | 73489756 | 73925677 | - | 3 | 0.92064 | 1.23217 | 0.22594 | 0         | 0.566288  | 0.630501  | 2.0928    | 0         | 0.369182  |
| TCONS_00115105    | XLOC_009891       | -             | lincRNA            | 287  | chr16 | 73643863 | 73925643 | - | 3 | 0       | 0       | 0       | 3.60608   | 0         | 0.814037  | 0.000758  | 0         | 1.00692   |
| TCONS_00115106    | XLOC_009891       | -             | lincRNA            | 1288 | chr16 | 73712946 | 73925643 | - | 2 | 0.65609 | 0.87124 | 0.2573  | 2.05526   | 0.714503  | 0.388297  | 0.647788  | 0.617325  | 0.219183  |
| TCONS_00118900    | XLOC_009906       | -             | lincRNA            | 1702 | chr16 | 75539152 | 75549338 | - | 2 | 3.39646 | 1.55447 | 2.09206 | 0.596762  | 1.76161   | 2.71715   | 1.67415   | 1.39411   | 1.4235    |
| TCONS_00110107    | XLOC_009349       | -             | intronic_lincRNA   | 748  | chr16 | 79027732 | 79030280 | + | 2 | 2.2287  | 1.03946 | 0.77245 | 0.819614  | 0.904262  | 1.41671   | 0.54118   | 2.08011   | 1.37974   |
| ENST00000569938.1 | ENSG00000261472.1 | RP11-467117.1 | lincRNA            | 419  | chr16 | 79539500 | 79550190 | + | 2 | 0.92388 | 0.32994 | 0       | 0.294455  | 0         | 0         | 0.560127  | 0         | 0         |
| TCONS_00113538    | XLOC_009351       | -             | lincRNA            | 1629 | chr16 | 79635820 | 79640634 | + | 2 | 3.42692 | 1.78275 | 2.1996  | 1.07535   | 1.59355   | 1.18188   | 1.31006   | 2.70609   | 1.29428   |
| TCONS_00113163    | XLOC_009933       | -             | intronic_lincRNA   | 507  | chr16 | 82077979 | 82086169 | - | 2 | 0.66101 | 1.16878 | 1.39656 | 0.209567  | 2.23769   | 1.61527   | 0.393295  | 0.53768   | 0.954872  |
| TCONS_00119134    | XLOC_009394       | -             | lincRNA            | 1390 | chr16 | 86750494 | 86753100 | + | 2 | 1.45702 | 1.01171 | 0.64647 | 1.00404   | 1.1758    | 0.650727  | 1.08341   | 1.96588   | 0.72911   |
| TCONS_00112858    | XLOC_009394       | -             | lincRNA            | 1369 | chr16 | 86751612 | 86771901 | + | 3 | 1.64006 | 1.41551 | 0.88752 | 0.526782  | 2.10833   | 0.846782  | 0.93295   | 1.24033   | 0.91244   |
| TCONS_00119135    | XLOC_009394       | -             | lincRNA            | 1723 | chr16 | 86770159 | 86772526 | + | 2 | 1.01841 | 1.00509 | 0.23688 | 0.493067  | 0.778655  | 0.551586  | 0.782938  | 1.69354   | 0.666282  |
| TCONS_00113558    | XLOC_009401       | -             | lincRNA            | 240  | chr16 | 87530607 | 87531224 | + | 2 | 0       | 1.62078 | 1.69891 | 1.41089   | 0         | 0         | 0         | 0         | 0         |
| TCONS_00119147    | XLOC_009416       | -             | intronic_lincRNA   | 2157 | chr16 | 89181335 | 89184058 | + | 2 | 1.13266 | 1.4278  | 1.60888 | 1.06047   | 1.03542   | 2.05859   | 1.00409   | 1.56156   | 1.31293   |
| TCONS_00114263    | XLOC_009416       | -             | intronic_lincRNA   | 674  | chr16 | 89183749 | 89184530 | + | 2 | 0.48967 | 1.42535 | 1.55948 | 1.21274   | 2.23049   | 1.34907   | 0.909672  | 0         | 0.817854  |
| TCONS_00117160    | XLOC_009416       | -             | intronic_lincRNA   | 638  | chr16 | 89184172 | 89184971 | + | 2 | 1.39285 | 0.6519  | 1.03466 | 1.99719   | 0.567169  | 2.68925   | 0.965636  | 0.746818  | 1.31043   |
| TCONS_00110760    | XLOC_009996       | -             | intronic_lincRNA   | 511  | chr16 | 89493196 | 89497892 | - | 2 | 1.63143 | 0.46139 | 0.91873 | 1.65484   | 1.40534   | 0.911044  | 0.388037  | 2.12222   | 1.13085   |
| TCONS_00125915    | XLOC_010687       | -             | intronic_lincRNA   | 679  | chr17 | 548986   | 550089   | - | 2 | 3.61011 | 4.31705 | 2.65738 | 0.938144  | 3.36726   | 4.8657    | 1.73922   | 1.02244   | 3.64805   |
| TCONS_00121438    | XLOC_010688       | -             | lincRNA            | 1638 | chr17 | 623986   | 635441   | - | 2 | 1.56085 | 0.68894 | 1.70002 | 0.623356  | 1.11275   | 0.831915  | 0.650897  | 0.728283  | 0.281344  |
| TCONS_00133475    | XLOC_010708       | -             | lincRNA            | 933  | chr17 | 1951888  | 1953169  | - | 2 | 4.58657 | 1.74408 | 1.82124 | 5.16015   | 1.01139   | 2.11575   | 2.81617   | 1.76955   | 2.05772   |
| ENST00000576086.1 | ENSG00000262823.1 | RP13-580F15.2 | anti-sense_lincRNA | 854  | chr17 | 4385261  | 4389648  | - | 2 | 0.93433 | 0.65218 | 0.75314 | 0.784443  | 1.04008   | 0.862672  | 0.542184  | 0.248299  | 1.1542    |
| TCONS_00125962    | XLOC_010742       | -             | lincRNA            | 344  | chr17 | 4704530  | 4710344  | - | 2 | 0.69782 | 0       | 0.51113 | 0         | 0.441719  | 0         | 2.18504   | 0         | 0.414496  |
| TCONS_00130474    | XLOC_010052       | -             | anti-sense_lincRNA | 2696 | chr17 | 4890981  | 4893960  | + | 3 | 3.39454 | 1.72661 | 2.73526 | 1.30753   | 2.92927   | 2.50724   | 1.27475   | 1.66413   | 2.01123   |
| ENST00000574260.1 | ENSG00000262227.1 | RP5-1050D4.5  | anti-sense_lincRNA | 551  | chr17 | 4891001  | 4891741  | + | 2 | 0       | 0       | 0       | 0         | 0         | 0.0002083 | 0.755618  | 1.47502   | 0         |
| TCONS_00125521    | XLOC_010052       | -             | anti-sense_lincRNA | 2448 | chr17 | 4891019  | 4893560  | + | 2 | 0.00021 | 0       | 0       | 0         | 0         | 0         | 0         | 0         | 0         |
| TCONS_00123970    | XLOC_010748       | -             | lincRNA            | 309  | chr17 | 4934278  | 4935102  | - | 2 | 0       | 1.34364 | 0.68243 | 1.18362   | 0         | 0         | 0         | 0.78999   | 0         |
| ENST00000573187.1 | ENSG00000233223.2 | AC113189.5    | anti-sense_lincRNA | 679  | chr17 | 7485790  | 7486836  | - | 2 | 1.27416 | 2.53068 | 2.50975 | 1.60825   | 1.2951    | 1.03212   | 0.993839  | 0.511219  | 0.851211  |
| TCONS_00124607    | XLOC_010100       | -             | lincRNA            | 491  | chr17 | 7621047  | 7622369  |   |   |         |         |         |           |           |           |           |           |           |

|                   |                   |                 |                    |      |       |          |          |   |   |         |         |         |          |          |          |          |          |          |
|-------------------|-------------------|-----------------|--------------------|------|-------|----------|----------|---|---|---------|---------|---------|----------|----------|----------|----------|----------|----------|
| TCONS_00127300    | XLOC_010117       | -               | lincRNA            | 313  | chr17 | 8771299  | 8772137  | + | 2 | 1.76416 | 0       | 0       | 0        | 1.13102  | 0        | 0        | 0        | 0.530463 |
| TCONS_00125592    | XLOC_010133       | -               | lincRNA            | 328  | chr17 | 12950511 | 12951249 | + | 2 | 0       | 0       | 0       | 1.00989  | 0        | 1.11542  | 1.48597  | 0        | 0        |
| TCONS_00124058    | XLOC_010831       | -               | anti-sense_lincRNA | 803  | chr17 | 13795965 | 13972787 | - | 3 | 0       | 2.0699  | 0.59995 | 1.1117   | 0.635127 | 0.641486 | 0        | 0        | 0.361758 |
| TCONS_00126879    | XLOC_010831       | -               | anti-sense_lincRNA | 3498 | chr17 | 13934267 | 13972965 | - | 3 | 3.41626 | 2.24567 | 4.24118 | 3.17398  | 2.67644  | 3.89362  | 2.03059  | 3.27373  | 3.90051  |
| ENST00000602539.1 | ENSG00000236088.5 | COX10-AS1       | anti-sense_lincRNA | 774  | chr17 | 13937168 | 13972796 | - | 2 | 1.71288 | 6.51804 | 3.91946 | 4.12865  | 2.59587  | 2.93196  | 3.30086  | 1.48606  | 5.79186  |
| TCONS_00129400    | XLOC_010851       | -               | lincRNA            | 302  | chr17 | 16836061 | 16836489 | - | 2 | 0       | 1.43533 | 0.73039 | 1.2628   | 1.25357  | 2.09473  | 0.629103 | 0        | 0        |
| ENST00000579168.2 | ENSG00000233098.4 | RP11-344E13.3   | lincRNA            | 638  | chr17 | 20859130 | 20861639 | + | 3 | 3.48212 | 3.42245 | 5.98416 | 0.43986  | 1.8433   | 2.25862  | 4.35799  | 3.73408  | 3.72765  |
| TCONS_00122493    | XLOC_010197       | -               | lincRNA            | 2475 | chr17 | 20863582 | 20886156 | + | 2 | 5.83308 | 1.45989 | 4.4111  | 0.450087 | 2.07999  | 2.9984   | 3.10175  | 3.56792  | 5.22597  |
| ENST00000456235.1 | ENSG00000236819.1 | AC087393.1      | lincRNA            | 750  | chr17 | 20978869 | 20993928 | + | 2 | 0.3701  | 0.12946 | 0.25653 | 0.11666  | 0.112617 | 0.256642 | 0.86267  | 0.592118 | 0.317233 |
| TCONS_00125626    | XLOC_010208       | -               | lincRNA            | 401  | chr17 | 26176824 | 26193002 | + | 2 | 0       | 1.44087 | 1.44332 | 0.321031 | 0        | 0.353903 | 0        | 0        | 1.47199  |
| TCONS_00130587    | XLOC_010254       | -               | lincRNA            | 232  | chr17 | 31204772 | 31205341 | + | 2 | 0       | 0       | 0       | 0        | 0        | 0        | 3.48841  | 2.30316  | 0        |
| ENST00000590478.1 | ENSG00000266947.1 | RP11-799D4.4    | lincRNA            | 2658 | chr17 | 33558469 | 33569982 | - | 2 | 1.78588 | 1.58091 | 2.91942 | 1.11948  | 1.22486  | 1.25873  | 1.96846  | 1.6343   | 2.37105  |
| TCONS_00123562    | XLOC_010269       | -               | lincRNA            | 1904 | chr17 | 33640429 | 33653083 | + | 3 | 0.71864 | 1.49412 | 0.85966 | 0.601075 | 0.64971  | 0.412854 | 0.959991 | 0.897342 | 1.3559   |
| ENST00000592381.1 | ENSG00000267321.1 | RP11-1094M14.11 | anti-sense_lincRNA | 1298 | chr17 | 33895139 | 33901811 | + | 2 | 3.80785 | 4.19403 | 4.27016 | 3.90855  | 3.59166  | 3.20627  | 3.31191  | 4.41105  | 3.63635  |
| TCONS_00129091    | XLOC_010280       | -               | anti-sense_lincRNA | 3567 | chr17 | 34404118 | 34420635 | + | 3 | 0.03862 | 0.04774 | 1.51529 | 3.38032  | 2.83914  | 5.84555  | 1.44312  | 1.2365   | 1.72882  |
| TCONS_00130593    | XLOC_010280       | -               | anti-sense_lincRNA | 4703 | chr17 | 34416126 | 34421050 | + | 2 | 0.53811 | 0.30915 | 0.55141 | 0.612384 | 0.208841 | 1.12407  | 0.39445  | 0.999685 | 0.308022 |
| TCONS_00126956    | XLOC_010957       | -               | lincRNA            | 498  | chr17 | 34444140 | 34476429 | - | 3 | 0.68083 | 0.72283 | 3.35999 | 0        | 0.209687 | 0.713345 | 0.811323 | 0.277215 | 0.393699 |
| ENST00000561550.2 | ENSG00000260833.2 | AC124789.1      | intronic_lincRNA   | 702  | chr17 | 36606638 | 36608643 | - | 4 | 0.54285 | 3.15853 | 2.43743 | 0.621297 | 1.6722   | 2.20098  | 1.86282  | 1.14633  | 2.05278  |
| ENST00000581922.1 | ENSG00000260833.2 | AC124789.1      | intronic_lincRNA   | 401  | chr17 | 36607300 | 36607932 | - | 2 | 0       | 0.39928 | 0       | 0        | 0.940954 | 0.353903 | 0        | 0        | 0.382356 |
| TCONS_00129463    | XLOC_010965       | -               | intronic_lincRNA   | 365  | chr17 | 36607779 | 36608633 | - | 2 | 2.02855 | 2.0475  | 3.40595 | 0.446694 | 0.56113  | 0.152018 | 1.99097  | 2.53473  | 0        |
| TCONS_00121817    | XLOC_010967       | -               | intronic_lincRNA   | 1208 | chr17 | 36701138 | 36703346 | - | 2 | 1.82069 | 0.91411 | 0.69474 | 0.444884 | 0.672745 | 0.48906  | 0.524205 | 0.400714 | 1.03378  |
| TCONS_00123586    | XLOC_010305       | -               | intronic_lincRNA   | 287  | chr17 | 37241750 | 37242737 | + | 2 | 1.12673 | 1.67647 | 0.85721 | 0        | 0        | 0        | 0        | 0        | 0        |
| TCONS_00133880    | XLOC_010308       | -               | lincRNA            | 1684 | chr17 | 37707254 | 37724349 | + | 4 | 2.88758 | 2.43161 | 3.4352  | 2.28661  | 2.90266  | 2.89241  | 2.0099   | 2.71371  | 2.80379  |
| TCONS_00121847    | XLOC_010991       | -               | intronic_lincRNA   | 1987 | chr17 | 38496838 | 38499119 | - | 2 | 0.34266 | 1.10797 | 0.78078 | 2.04177  | 0.997982 | 0.944786 | 0.653643 | 0.720381 | 0.775658 |
| TCONS_00125696    | XLOC_010326       | -               | lincRNA            | 1507 | chr17 | 38679624 | 38683918 | + | 2 | 0.31219 | 0.70411 | 0.85557 | 0.391957 | 0.471066 | 0.753911 | 0.761539 | 0.740125 | 1.59255  |
| TCONS_00126147    | XLOC_011002       | -               | lincRNA            | 350  | chr17 | 38873626 | 38875362 | - | 3 | 0       | 0       | 0.48979 | 0.430936 | 0.423606 | 5.23166  | 0.418419 | 0        | 0.397517 |
| TCONS_00133029    | XLOC_011025       | -               | lincRNA            | 436  | chr17 | 39784242 | 39785060 | - | 3 | 8.15094 | 3.9736  | 6.71874 | 0        | 2.12864  | 0.902719 | 4.40082  | 0.705826 | 1.99813  |
| TCONS_00129126    | XLOC_010361       | -               | lincRNA            | 356  | chr17 | 41480016 | 41485136 | + | 2 | 1.29055 | 1.86802 | 0.94024 | 0.828607 | 2.44135  | 0.914341 | 0        | 0.543763 | 0        |
| TCONS_00123635    | XLOC_010363       | -               | anti-sense_lincRNA | 558  | chr17 | 41613502 | 41621722 | + | 2 | 0.85112 | 1.79956 | 0.39756 | 0.538671 | 0.347973 | 0.197645 | 0.167674 | 0.688603 | 0.163346 |
| TCONS_00121078    | XLOC_010364       | -               | lincRNA            | 276  | chr17 | 41756587 | 41757692 | + | 2 | 1.2724  | 0       | 0       | 0.833956 | 1.66893  | 0        | 0        | 0        | 0        |
| ENST00000591137.1 | ENSG00000267405.1 | CTC-296K1.4     | lincRNA            | 587  | chr17 | 42872115 | 42875151 | - | 2 | 2.10052 | 0.18476 | 0.36708 | 1.16225  | 0.482267 | 0.365469 | 3.40359  | 0.63574  | 0.150929 |
| ENST00000585471.1 | ENSG00000267121.1 | CTD-2020K17.1   | anti-sense_lincRNA | 1077 | chr17 | 43295623 | 43297792 | - | 2 | 1.04599 | 1.75743 | 0.5597  | 1.68058  | 0.562828 | 1.12466  | 0.804798 | 1.10691  | 1.32131  |
| ENST00000591365.1 | ENSG00000267121.1 | CTD-2020K17.1   | lincRNA            | 2238 | chr17 | 43296717 | 43299589 | - | 2 | 1.00165 | 2.40259 | 2.59999 | 2.638    | 1.71929  | 1.86357  | 1.31712  | 2.40663  | 2.91768  |
| ENST00000589518.1 | ENSG00000233483.2 | CTD-2020K17.4   | lincRNA            | 393  | chr17 | 43324634 | 43325210 | - | 2 | 0.52338 | 1.50208 | 0.75285 | 1.67219  | 0.981001 | 1.10621  | 0.960239 | 0.435183 | 1.22768  |
| TCONS_00130975    | XLOC_011095       | -               | lincRNA            | 249  | chr17 | 43441023 | 43442271 | - | 2 | 0       | 0       | 0       | 0        | 0        | 0        | 0        | 0        | 1.1481   |
| TCONS_00127848    | XLOC_011111       | -               | lincRNA            | 286  | chr17 | 45713704 | 45726783 | - | 2 | 7.97078 | 1.69518 | 0       | 1.48693  | 2.22436  | 0        | 0.749615 | 1.0043   | 0        |
| TCONS_00134137    | XLOC_011121       | -               | anti-sense_lincRNA | 688  | chr17 | 46187383 | 46195749 | - | 3 | 0.62538 | 1.46087 | 1.30374 | 0.263079 | 0.127094 | 0.578847 | 1.09693  | 3.00965  | 1.79     |
| TCONS_00133912    | XLOC_010418       | -               | anti-sense_lincRNA | 1327 | chr17 | 46622664 | 46626800 | + | 2 | 1.53831 | 0.40559 | 1.48994 | 0.738828 | 0.656019 | 0.187415 | 1.97708  | 1.4322   | 1.43746  |
| ENST00000511322.1 | ENSG00000250948.1 | RP11-1079K10.2  | lincRNA            | 245  | chr17 | 47452742 | 47457456 | + | 2 | 0       | 0       | 0       | 1.29457  | 0        | 0        | 0        | 1.80063  | 0        |
| TCONS_00132068    | XLOC_010457       | -               | lincRNA            | 637  | chr17 | 50466936 | 50609979 | + | 3 | 0       | 0.3267  | 0.9731  | 0.146957 | 7.08E-06 | 0        | 1.38429  | 0        | 1.2015   |
| TCONS_00130684    | XLOC_010457       | -               | lincRNA            | 488  | chr17 | 50467223 | 50468176 | + | 2 | 1.40858 | 0       | 0.99369 | 0        | 0.434211 | 1.47666  | 1.86198  | 2.29723  | 1.62968  |
| TCONS_00127471    | XLOC_010458       | -               | lincRNA            | 493  | chr17 | 50816824 | 50819679 | + | 2 | 0.69236 | 0       | 0.97687 | 0.65893  | 0        | 0        | 0        | 1.41049  | 0        |
| TCONS_00129174    | XLOC_010464       | -               | lincRNA            | 493  | chr17 | 53900053 | 53920344 | + | 2 | 0.69236 | 0.24513 | 0.48844 | 0.219643 | 0.426669 | 0.967498 | 0.206437 | 0        | 1.00136  |
| TCONS_00121186    | XLOC_010466       | -               | intronic_lincRNA   | 1114 | chr17 | 54369380 | 54372750 | + | 2 | 2.45361 | 0.93109 | 1.45708 | 0.420628 | 0.404926 | 0.462429 | 0.514522 | 0.707759 | 1.45762  |
| TCONS_00122022    | XLOC_011164       | -               | lincRNA            | 2056 | chr17 | 54900939 | 54903221 | - | 2 | 1.86958 | 2.43804 | 1.20259 | 1.06911  | 0.761987 | 1.02329  | 0.943775 | 1.17021  | 1.74233  |
| ENST00000576313.1 | ENSG00000263004.1 | RP11-166P13.3   | lincRNA            | 449  | chr17 | 55156508 | 55162385 | - | 2 | 4.88167 | 3.18307 | 5.48906 | 1.03495  | 2.77069  | 1.71026  | 7.58558  | 2.33667  | 3.78308  |
| TCONS_00123179    | XLOC_011173       | -               | lincRNA            | 1536 | chr17 | 56124338 | 56138101 | - | 6 | 4.39235 | 2.33985 | 2.3684  | 0.142557 | 0.649354 | 0.880775 | 1.40427  | 1.73427  | 0.840254 |
| TCONS_00122042    | XLOC_011173       | -               | lincRNA            | 2395 | chr17 | 56127929 | 56138107 | - | 6 | 4.71897 | 1.92653 | 1.51526 | 0.292315 | 0.837424 | 0.713852 | 2.2043   | 0.484114 | 0.935671 |
| TCONS_00129181    | XLOC_010478       | -               | lincRNA            | 406  | chr17 | 56297081 | 56310086 | + | 2 | 0.9815  | 0.35127 | 3.51717 | 0.313181 | 2.14091  | 0.690444 | 1.19499  | 0.813115 | 1.1483   |
| ENST00000593015.1 | ENSG00000267302.1 | RP11-178C3.2    | lincRNA            | 692  | chr17 | 58042193 | 58050465 | + | 3 | 1.03386 | 1.59375 | 1.4366  | 0.391398 | 1.26048  | 0.717645 | 1.81297  | 1.65817  | 0.355056 |
| TCONS_00126252    | XLOC_011212       | -               | lincRNA            | 264  | chr17 | 61532351 | 61536847 | - | 2 | 1.47557 | 0       | 2.29926 | 0.972287 | 0.977243 | 0        | 1.99969  | 0        | 0        |
| ENST00000577544.1 | ENSG00000264754.1 | CTD-2653B5.1    | intronic_lincRNA   | 612  | chr17 | 65520597 | 65521538 | + | 2 | 0.98686 | 0.86698 | 1.03297 | 0.623661 | 0.60346  | 1.88742  | 0.14504  | 0.993792 | 0.566585 |
| TCONS_00133407    | XLOC_010538       | -               | lincRNA            | 2599 | chr17 | 66610928 | 66654909 | + | 2 | 7.02119 | 2.44454 | 2.84626 | 1.68054  | 3.27851  | 1.81734  | 1.02071  | 2.8134   | 1.51543  |
| TCONS_00123787    | XLOC_010539       | -               | lincRNA            | 613  | chr17 | 66677443 | 66678259 | + | 2 | 1.96897 | 2.07564 | 0.51521 | 0.311072 | 0.451484 | 0.68463  | 0.434034 | 1.38786  | 0.282597 |
| TCONS_00132845    | XLOC_010538       | -               | anti-sense_lincRNA | 1633 | chr17 | 66817852 | 66871541 | + | 3 | 2.42063 | 1.53084 | 1.26731 | 1.34043  | 0.68717  | 1.22768  | 0.857308 | 1.68656  | 0.967987 |
| TCONS_00122784    | XLOC_010540       | -               | anti-sense_lincRNA | 241  | chr17 | 67008117 | 67008505 | + | 2 | 8.30464 | 4.77703 | 3.33576 | 0        | 0        | 0        | 0        | 0        | 0        |
| TCONS_00133712    | XLOC_011247       | -               | lincRNA            | 633  | chr17 | 68193759 | 68204704 | - | 2 | 0.93923 | 0.32976 | 0.32728 | 0.148321 | 0.143451 | 0        | 0.413414 | 1.13344  | 1.34688  |
| TCONS_00123284    | XLOC_011249       | -               | lincRNA            | 1107 | chr17 | 70017598 | 70030391 | - | 4 | 3.59636 | 1.09517 | 0       | 2.18417  | 2.87173  | 7.82363  | 0.453707 | 4.50802  | 0.872202 |
| ENST00000543512.1 | ENSG00000228639.2 | AC005152.3      | lincRNA            | 323  | chr17 | 70017992 | 70030233 | - | 2 | 0       | 0.59139 | 0       | 1.61971  | 4.03514  | 6.53954  | 0.001665 | 1.70012  | 0.654028 |
| TCONS_00130407    | XLOC_011249       | -               | lincRNA            | 5924 | chr17 | 70048341 | 70054419 | - | 2 | 2.0877  | 0.60405 | 0.14576 | 1.26276  | 3.41972  | 6.70337  | 0.40623  | 4.0196   |          |

|                   |                   |               |                   |      |       |          |          |   |   |         |         |         |           |          |          |          |          |          |
|-------------------|-------------------|---------------|-------------------|------|-------|----------|----------|---|---|---------|---------|---------|-----------|----------|----------|----------|----------|----------|
| TCONS_00121284    | XLOC_010548       | -             | intronic_lncRNA   | 1754 | chr17 | 70770204 | 70772575 | + | 2 | 3.28296 | 2.77693 | 3.50421 | 0.411978  | 0.752244 | 0.588603 | 2.06914  | 1.29537  | 1.41288  |
| TCONS_00126301    | XLOC_011271       | -             | intronic_lncRNA   | 532  | chr17 | 72725994 | 72727011 | - | 2 | 1.83469 | 1.2952  | 2.57718 | 0.581094  | 0.563539 | 0.63973  | 1.08776  | 0.496045 | 1.58718  |
| TCONS_00129642    | XLOC_011302       | -             | lincRNA           | 490  | chr17 | 74116187 | 74117085 | - | 2 | 0       | 0       | 1.23411 | 0         | 1.07792  | 1.22199  | 0.625987 | 0.57022  | 0.404767 |
| TCONS_00127545    | XLOC_010607       | -             | lincRNA           | 296  | chr17 | 75662995 | 75673404 | + | 2 | 0       | 0.09886 | 0.22362 | 2.35181   | 1.00676  | 0        | 0        | 0        | 0.624239 |
| TCONS_00126778    | XLOC_010607       | -             | lincRNA           | 804  | chr17 | 75663011 | 75664085 | + | 2 | 0.5057  | 0.45582 | 1.4826  | 0.582735  | 0.254872 | 0.116799 | 0.29399  | 0.269176 | 0        |
| TCONS_00122252    | XLOC_011317       | -             | lincRNA           | 1135 | chr17 | 75883944 | 75889962 | - | 4 | 2.39479 | 0.64426 | 1.84465 | 0.0835981 | 0.10332  | 0.301343 | 0.628519 | 0.193851 | 0.185829 |
| TCONS_00126342    | XLOC_011317       | -             | lincRNA           | 1233 | chr17 | 75886945 | 75889943 | - | 2 | 0.49701 | 0.65207 | 0.97521 | 0.296431  | 0.443569 | 0.409024 | 0.284094 | 0.606563 | 0.224139 |
| TCONS_00128395    | XLOC_010618       | -             | lincRNA           | 1638 | chr17 | 76356527 | 76361808 | + | 3 | 0.56758 | 0.29526 | 0.24286 | 1.87007   | 0.213991 | 0.978723 | 0.406811 | 0.112044 | 0.522496 |
| TCONS_00128019    | XLOC_011384       | -             | lincRNA           | 285  | chr17 | 80345285 | 80346277 | - | 2 | 1.15087 | 0.85714 | 0       | 2.25508   | 0        | 0        | 0        | 0        | 0        |
| ENST00000578344.1 | ENSG00000265458.1 | RP13-20L14.6  | anti-sense_lncRNA | 210  | chr17 | 80415242 | 80415575 | - | 2 | 0       | 0       | 0       | 0         | 2.76983  | 2.99218  | 0        | 3.85668  | 0        |
| TCONS_00121430    | XLOC_010676       | -             | intronic_lncRNA   | 472  | chr17 | 80896363 | 80896962 | + | 2 | 3.72692 | 0.26443 | 2.10948 | 1.18357   | 2.07132  | 1.04289  | 1.56164  | 0.913875 | 2.16048  |
| TCONS_00132177    | XLOC_010677       | -             | lincRNA           | 3357 | chr17 | 81054348 | 81058337 | + | 2 | 1.52011 | 1.76712 | 0.90408 | 4.94507   | 1.90634  | 2.73899  | 1.29116  | 1.37308  | 2.30187  |
| TCONS_00125909    | XLOC_010678       | -             | lincRNA           | 377  | chr17 | 81091942 | 81092925 | + | 2 | 1.70995 | 0       | 0.412   | 0.364892  | 1.07217  | 0.80488  | 2.10514  | 0        | 0.335425 |
| TCONS_00137109    | XLOC_011623       | -             | lincRNA           | 261  | chr18 | 2441764  | 2443245  | - | 2 | 0       | 0       | 0       | 0         | 0        | 0        | 0        | 2.78341  | 0        |
| TCONS_00135425    | XLOC_011421       | -             | intronic_lncRNA   | 367  | chr18 | 6256802  | 6258948  | + | 2 | 1.81062 | 2.17767 | 0       | 0         | 0        | 0        | 0        | 0.506306 | 0        |
| ENST00000583691.1 | ENSG00000266604.1 | RP11-856M7.6  | lincRNA           | 631  | chr18 | 10612399 | 10617010 | - | 2 | 0       | 0.16565 | 0.16442 | 0         | 0        | 0        | 0        | 0        | 0        |
| ENST00000589930.1 | ENSG00000267654.1 | RP11-973H7.4  | lincRNA           | 569  | chr18 | 12739489 | 12749420 | - | 2 | 0       | 0.1939  | 0.38542 | 0.174177  | 0        | 0        | 0        | 0.222516 | 0.316806 |
| TCONS_00137145    | XLOC_011659       | -             | intronic_lncRNA   | 575  | chr18 | 13600744 | 13608677 | - | 2 | 0.54184 | 0       | 1.51643 | 0         | 0.331957 | 0        | 0.319645 | 0.437732 | 0.155831 |
| TCONS_00135733    | XLOC_011679       | -             | lincRNA           | 1687 | chr18 | 21543202 | 21563071 | - | 2 | 2.17478 | 1.59186 | 0.95525 | 0.0933918 | 0.58462  | 1.076    | 0.729375 | 0.905198 | 1.0116   |
| TCONS_00137159    | XLOC_011679       | -             | lincRNA           | 302  | chr18 | 21547639 | 21562571 | - | 2 | 3.21159 | 1.10883 | 5.59405 | 1.78745   | 1.17384  | 0.880861 | 0.915219 | 3.62599  | 1.74575  |
| TCONS_00135734    | XLOC_011680       | -             | intronic_lncRNA   | 382  | chr18 | 21574347 | 21574842 | - | 2 | 2.77279 | 0.79758 | 1.60075 | 0.709601  | 0.347309 | 1.56508  | 1.70315  | 0.92543  | 3.58567  |
| TCONS_00135494    | XLOC_011478       | -             | anti-sense_lncRNA | 3317 | chr18 | 24763055 | 24771567 | + | 2 | 6.0349  | 2.12401 | 5.43334 | 0         | 2.20181  | 1.82003  | 2.47809  | 1.78459  | 1.28293  |
| TCONS_00135986    | XLOC_011478       | -             | anti-sense_lncRNA | 3552 | chr18 | 24763055 | 24771567 | + | 3 | 2.46044 | 1.41664 | 3.08827 | 0.668039  | 1.14031  | 0.908171 | 2.81991  | 0.519779 | 1.14695  |
| TCONS_00137738    | XLOC_011479       | -             | lincRNA           | 1463 | chr18 | 24815205 | 24846792 | + | 4 | 6.05713 | 4.26038 | 6.36517 | 1.52112   | 2.389    | 1.83911  | 2.41135  | 1.65989  | 1.19042  |
| TCONS_00140529    | XLOC_011692       | -             | lincRNA           | 722  | chr18 | 26646773 | 26695729 | - | 3 | 0.19494 | 0.13647 | 0.27053 | 0         | 0.118725 | 0        | 0.910036 | 0.468342 | 3.79022  |
| TCONS_00135504    | XLOC_011492       | -             | intronic_lncRNA   | 3640 | chr18 | 30530594 | 30541147 | + | 3 | 1.39513 | 0.1642  | 2.44808 | 0.037197  | 0.749681 | 0.408698 | 1.31995  | 1.0965   | 1.72664  |
| TCONS_00137004    | XLOC_011496       | -             | intronic_lncRNA   | 5549 | chr18 | 32657969 | 32663834 | + | 2 | 1.43207 | 0.10585 | 1.91093 | 3.09727   | 1.26197  | 1.65543  | 1.36954  | 1.58885  | 1.79937  |
| ENST00000593122.1 | ENSG00000267583.1 | RP11-322E11.5 | lincRNA           | 364  | chr18 | 33023833 | 33046716 | - | 3 | 0.61438 | 0       | 0.44618 | 2.36399   | 0        | 0        | 0.380499 | 0        | 0        |
| ENST00000568654.1 | ENSG00000260552.1 | RP11-49I11.1  | lincRNA           | 609  | chr18 | 33759959 | 33767411 | - | 2 | 0.74555 | 1.92153 | 3.2956  | 2.04183   | 0.911923 | 1.55558  | 2.92272  | 0.60075  | 2.28319  |
| TCONS_00139083    | XLOC_011720       | -             | lincRNA           | 3032 | chr18 | 36169402 | 36308390 | - | 4 | 0.57732 | 0.20914 | 0.59026 | 0.0903762 | 0.45086  | 0.869067 | 0.908227 | 1.31275  | 0.980416 |
| TCONS_00137599    | XLOC_011720       | -             | lincRNA           | 656  | chr18 | 36174165 | 36308377 | - | 2 | 0.35839 | 0       | 1.18729 | 0         | 0.516391 | 1.19506  | 1.71115  | 0.570824 | 1.89085  |
| TCONS_00137191    | XLOC_011720       | -             | lincRNA           | 3517 | chr18 | 36272082 | 36308351 | - | 2 | 0.56578 | 0.3324  | 2.14765 | 0.0192885 | 0.896365 | 1.51066  | 0.715314 | 1.89992  | 1.63558  |
| TCONS_00139507    | XLOC_011509       | -             | lincRNA           | 466  | chr18 | 37445231 | 37446028 | + | 2 | 0.76206 | 0       | 0       | 0         | 0.235447 | 0.266657 | 1.14177  | 1.87042  | 0.221022 |
| TCONS_00135525    | XLOC_011510       | -             | lincRNA           | 432  | chr18 | 37448857 | 37451152 | + | 2 | 2.1816  | 0       | 1.24343 | 0         | 0        | 0.306148 | 0.263566 | 0.359237 | 0        |
| TCONS_00137020    | XLOC_011513       | -             | lincRNA           | 438  | chr18 | 39739056 | 39739765 | + | 2 | 0       | 1.21215 | 0.90821 | 1.89548   | 1.84655  | 2.38682  | 0        | 0.699667 | 0.742859 |
| TCONS_00138810    | XLOC_011732       | -             | anti-sense_lncRNA | 542  | chr18 | 42987960 | 43084017 | - | 3 | 1.09624 | 4.00167 | 3.32379 | 11.3128   | 2.64465  | 3.42142  | 1.93529  | 1.89424  | 1.36491  |
| TCONS_00136843    | XLOC_011732       | -             | intronic_lncRNA   | 1717 | chr18 | 43071047 | 43084422 | - | 3 | 1.70215 | 3.53957 | 2.62566 | 6.44986   | 1.19614  | 1.59877  | 1.15605  | 1.38694  | 0.762714 |
| TCONS_00139632    | XLOC_011735       | -             | anti-sense_lncRNA | 364  | chr18 | 43327120 | 43348122 | - | 2 | 1.84317 | 0       | 1.78497 | 0.393999  | 0.386535 | 0        | 1.14172  | 1.03203  | 0.362746 |
| TCONS_00137602    | XLOC_011735       | -             | lincRNA           | 239  | chr18 | 43359383 | 43362755 | - | 3 | 6.44418 | 0       | 1.73088 | 0         | 0        | 1.59672  | 4.5526   | 0        | 0        |
| TCONS_00137196    | XLOC_011736       | -             | anti-sense_lncRNA | 1067 | chr18 | 43379867 | 43410222 | - | 2 | 1.88094 | 0.49094 | 2.02221 | 0.147827  | 0.355852 | 0.568835 | 0.74636  | 0.279954 | 0.601492 |
| TCONS_00138249    | XLOC_011752       | -             | intronic_lncRNA   | 1824 | chr18 | 44616851 | 44624604 | - | 2 | 2.38765 | 0.87109 | 1.37532 | 0.946078  | 1.43941  | 1.03974  | 0.791713 | 1.48705  | 1.67193  |
| TCONS_00137913    | XLOC_011773       | -             | lincRNA           | 1620 | chr18 | 52270794 | 52274388 | - | 2 | 0.57477 | 0.29902 | 0.29515 | 0.270544  | 0.520115 | 0.545134 | 0.947626 | 0.851049 | 1.05829  |
| TCONS_00137053    | XLOC_011552       | -             | lincRNA           | 396  | chr18 | 56327117 | 56327930 | + | 2 | 0.51547 | 0.73927 | 1.11127 | 1.64641   | 1.60932  | 0.363031 | 0.629788 | 0        | 1.51051  |
| TCONS_00136915    | XLOC_011795       | -             | lincRNA           | 1034 | chr18 | 59567595 | 59685462 | - | 3 | 0.34941 | 0.95336 | 0.28855 | 1.22565   | 1.39574  | 2.03189  | 0.46981  | 0.857733 | 0.291732 |
| TCONS_00135854    | XLOC_011795       | -             | lincRNA           | 1334 | chr18 | 59567782 | 59578190 | - | 2 | 1.90121 | 0.23705 | 0.7138  | 0.624135  | 0.550903 | 1.42488  | 0.379667 | 0.652018 | 0.193981 |
| ENST00000589905.1 | ENSG00000267390.1 | RP11-635N19.1 | anti-sense_lncRNA | 785  | chr18 | 61034561 | 61048862 | + | 2 | 0.87011 | 2.55437 | 2.04807 | 1.75453   | 0.740696 | 1.68853  | 2.02493  | 1.66836  | 2.0865   |
| TCONS_00137932    | XLOC_011814       | -             | lincRNA           | 1263 | chr18 | 71314549 | 71358512 | - | 3 | 0.57556 | 0.19998 | 0.06585 | 2.53095   | 0.927637 | 1.39108  | 1.32472  | 1.06343  | 0.980011 |
| TCONS_00137933    | XLOC_011814       | -             | lincRNA           | 1046 | chr18 | 71350501 | 71358527 | - | 2 | 0.24094 | 0.16774 | 0.08292 | 1.66655   | 0.948336 | 0.832855 | 0.278238 | 0.765281 | 0.411014 |
| TCONS_00135624    | XLOC_011593       | -             | intronic_lncRNA   | 1492 | chr18 | 72722987 | 72724598 | + | 2 | 1.65799 | 1.53423 | 1.94754 | 1.28867   | 1.14374  | 1.9067   | 0.95175  | 1.93435  | 2.10341  |
| TCONS_00137087    | XLOC_011595       | -             | lincRNA           | 460  | chr18 | 73168370 | 73170270 | + | 2 | 0       | 0.27688 | 1.65759 | 0.495431  | 0        | 0        | 0.233869 | 0.319187 | 0.22623  |
| TCONS_00140069    | XLOC_011604       | -             | lincRNA           | 264  | chr18 | 76201919 | 76203401 | + | 2 | 0       | 0       | 1.14963 | 0         | 0.977243 | 0        | 0        | 3.99702  | 0        |
| TCONS_00138428    | XLOC_011609       | -             | lincRNA           | 335  | chr18 | 77341580 | 77343751 | + | 2 | 0       | 0       | 0       | 0         | 1.41569  | 0        | 0        | 0        | 0        |
| ENST00000589457.1 | ENSG00000267751.1 | AC009005.2    | anti-sense_lncRNA | 719  | chr19 | 567212   | 571745   | - | 2 | 0.39212 | 0.41181 | 0.13606 | 0         | 0.477674 | 0.408074 | 0.915422 | 0.157033 | 0.11213  |
| ENST00000606242.1 | ENSG00000267530.2 | AC006273.5    | lincRNA           | 710  | chr19 | 782755   | 784948   | + | 2 | 9.38275 | 11.9096 | 7.37607 | 4.37648   | 3.51648  | 4.86718  | 3.98328  | 2.34876  | 1.66346  |
| ENST00000586061.1 | ENSG00000267530.2 | AC006273.5    | lincRNA           | 829  | chr19 | 782796   | 785080   | + | 2 | 3.55669 | 4.94715 | 1.31444 | 1.55221   | 2.76049  | 1.21579  | 1.58034  | 0.556281 | 1.23971  |
| TCONS_00145657    | XLOC_012657       | -             | lincRNA           | 339  | chr19 | 2028705  | 2034959  | - | 2 | 0.72227 | 0.52543 | 2.12136 | 0.465089  | 0.458006 | 0.513477 | 0.907522 | 0.613584 | 0        |
| TCONS_00150513    | XLOC_012739       | -             | lincRNA           | 244  | chr19 | 7448182  | 7459936  | - | 3 | 0       | 7.58888 | 3.16026 | 0         | 0        | 1.46288  | 6.91501  | 0        | 2.49777  |
| TCONS_00149507    | XLOC_012744       | -             | lincRNA           | 281  | chr19 | 7771168  | 7771931  | - | 2 | 0       | 0       | 0       | 0         | 0.785484 | 1.74163  | 0        | 0        | 0        |
| TCONS_00145718    | XLOC_012771       | -             | lincRNA           | 632  | chr19 | 9146316  | 9176438  | - | 2 | 1.64745 | 0.82633 | 1.31222 | 0.297331  | 1.1503   | 2.94452  | 1.2432   | 1.13613  | 0.270007 |
| TCONS_00144633    | XLOC_011973       | -             | lincRNA           | 4373 | chr19 | 9820337  | 9834259  | + | 2 | 1.27256 | 1.55621 | 1.86712 | 0.337263  | 0.456009 | 1.26324  | 1.26866  | 0.672796 | 0.746009 |
| ENST00000426044.1 | ENSG00000234773.2 | CTD-2666L21.1 | lincRNA           | 917  | chr19 | 12305832 | 12348582 | + | 3 | 1.98911 | 3.26939 | 1.4703  | 0.804753  | 0.775604 | 1.96649  | 1.56348  | 1.130    |          |

|                   |                   |               |                    |      |       |          |          |   |   |         |         |         |           |           |           |          |           |           |
|-------------------|-------------------|---------------|--------------------|------|-------|----------|----------|---|---|---------|---------|---------|-----------|-----------|-----------|----------|-----------|-----------|
| TCONS_00145766    | XLOC_012821       | -             | lincRNA            | 670  | chr19 | 12754689 | 12755756 | - | 2 | 0.86563 | 0.75874 | 0.30103 | 0.273195  | 0.528082  | 0.450854  | 0.380014 | 1.21615   | 1.11562   |
| TCONS_00146759    | XLOC_012023       | -             | lincRNA            | 572  | chr19 | 13842589 | 13843254 | + | 2 | 2.45782 | 3.46168 | 2.48456 | 1.38212   | 1.84071   | 1.33108   | 0.805771 | 1.54473   | 2.19949   |
| TCONS_00147176    | XLOC_012857       | -             | lincRNA            | 287  | chr19 | 14477515 | 14480783 | - | 2 | 1.12673 | 0       | 0       | 1.4708    | 0         | 0         | 0        | 0         | 0.687349  |
| TCONS_00150233    | XLOC_012042       | -             | lincRNA            | 405  | chr19 | 15674435 | 15675252 | + | 2 | 0       | 0       | 0       | 0         | 0.307375  | 0.693848  | 1.80173  | 0         | 0         |
| TCONS_00152386    | XLOC_012886       | -             | lincRNA            | 271  | chr19 | 16403733 | 16435339 | - | 2 | 0       | 2.02839 | 2.08786 | 0.887044  | 0         | 0         | 0.906072 | 1.20959   | 3.33267   |
| TCONS_00143168    | XLOC_012949       | -             | lincRNA            | 546  | chr19 | 20411838 | 20432181 | - | 2 | 6.75018 | 0.62099 | 0.20585 | 0.185818  | 0         | 2.04551   | 0        | 0         | 0         |
| TCONS_00141230    | XLOC_012142       | -             | intronic_lincRNA   | 587  | chr19 | 23281169 | 23283391 | + | 2 | 2.10052 | 0.55427 | 0.55062 | 0         | 0.160756  | 1.27914   | 0.309417 | 0.423827  | 0.150929  |
| TCONS_00152121    | XLOC_012145       | -             | lincRNA            | 1368 | chr19 | 23956799 | 23963169 | + | 3 | 4.19129 | 1.75852 | 2.21575 | 0.712852  | 2.58426   | 3.4356    | 0.602197 | 0.897989  | 2.32778   |
| TCONS_00152122    | XLOC_012146       | -             | lincRNA            | 917  | chr19 | 23969220 | 23970232 | + | 2 | 2.41534 | 0.99072 | 1.27426 | 0.357668  | 1.12032   | 1.47487   | 0.740595 | 0.90478   | 1.13292   |
| TCONS_00144724    | XLOC_012145       | -             | lincRNA            | 976  | chr19 | 24216162 | 24241206 | + | 4 | 6.30271 | 8.96568 | 5.42895 | 5.86475   | 5.65002   | 7.62919   | 5.46719  | 6.26365   | 5.90336   |
| TCONS_00143183    | XLOC_012967       | -             | lincRNA            | 257  | chr19 | 27731866 | 27740264 | - | 3 | 30.8333 | 35.67   | 0       | 0         | 1.08165   | 0         | 17.7826  | 0         | 0         |
| TCONS_00143182    | XLOC_012967       | -             | lincRNA            | 403  | chr19 | 27731895 | 27732965 | - | 2 | 53.277  | 52.4179 | 13.2138 | 3.49629   | 6.20963   | 2.45265   | 14.564   | 40.0442   | 7.57702   |
| TCONS_00148541    | XLOC_012971       | -             | lincRNA            | 459  | chr19 | 31647090 | 31719012 | - | 3 | 0.39124 | 0       | 0       | 0         | 0.96779   | 0.547867  | 1.40889  | 0.320463  | 0.681365  |
| TCONS_00149283    | XLOC_012170       | -             | lincRNA            | 265  | chr19 | 33301000 | 33302196 | + | 2 | 1.45646 | 0       | 0       | 0         | 0.963747  | 2.12736   | 0        | 0         | 0         |
| ENST00000592220.1 | ENSG00000267024.1 | CTD-2588C8.8  | lincRNA            | 442  | chr19 | 34917017 | 34919178 | - | 2 | 1.25539 | 0.89376 | 0.29756 | 0         | 0         | 0         | 0.252135 | 0         | 0         |
| TCONS_00150925    | XLOC_012231       | -             | intronic_lincRNA   | 1034 | chr19 | 37064042 | 37066370 | + | 2 | 2.32177 | 1.4778  | 2.1574  | 1.93067   | 1.48016   | 2.66115   | 2.06909  | 1.35329   | 1.32541   |
| ENST00000448373.2 | ENSG00000233527.4 | AC092295.7    | intronic_lincRNA   | 1004 | chr19 | 37064279 | 37068817 | + | 3 | 1.64769 | 2.5275  | 1.77686 | 1.50474   | 1.15185   | 2.67355   | 1.0756   | 1.51639   | 1.14849   |
| ENST00000425254.2 | ENSG00000225975.2 | AC074138.3    | lincRNA            | 815  | chr19 | 37176367 | 37178312 | - | 3 | 2.31786 | 3.12256 | 2.29025 | 2.92019   | 2.11269   | 1.72052   | 2.40522  | 1.98215   | 2.17273   |
| TCONS_00145421    | XLOC_012248       | -             | lincRNA            | 534  | chr19 | 38308002 | 38310936 | + | 3 | 0.60793 | 0.85821 | 0.06722 | 0         | 0.186702  | 1.27174   | 0.360334 | 0.246495  | 0.876399  |
| TCONS_00143236    | XLOC_013074       | -             | anti-sense_lincRNA | 3066 | chr19 | 41485436 | 41497381 | - | 3 | 7.7325  | 0.00026 | 1.89745 | 0.0001955 | 0.0004367 | 0.0062595 | 4.47937  | 1.71414   | 0.128819  |
| TCONS_00146566    | XLOC_013074       | -             | anti-sense_lincRNA | 3068 | chr19 | 41485492 | 41497381 | - | 3 | 3.70946 | 3.20922 | 13.965  | 4.70665   | 13.5689   | 6.06891   | 0.559245 | 0.0238409 | 0.128101  |
| TCONS_00150690    | XLOC_013074       | -             | lincRNA            | 738  | chr19 | 41485722 | 41496278 | - | 2 | 2.97777 | 0.75132 | 7.17869 | 1.91165   | 5.11376   | 1.07289   | 5.85549  | 0.600673  | 0.34934   |
| ENST00000594315.1 | ENSG00000267107.2 | AC011526.1    | lincRNA            | 1062 | chr19 | 41961601 | 42006559 | - | 3 | 3.54716 | 2.71594 | 1.87133 | 5.57572   | 2.50551   | 3.10593   | 2.5935   | 1.59571   | 1.74779   |
| TCONS_00144364    | XLOC_013082       | -             | lincRNA            | 1014 | chr19 | 42005807 | 42006924 | - | 2 | 1.00154 | 1.56936 | 0.77591 | 2.28337   | 0.682531  | 1.38512   | 0.723351 | 0.397857  | 0.142428  |
| TCONS_00143765    | XLOC_012321       | -             | lincRNA            | 5318 | chr19 | 42039173 | 42047238 | + | 2 | 0.90366 | 1.78207 | 1.61168 | 3.00823   | 1.41895   | 2.88068   | 1.45467  | 2.77152   | 2.76607   |
| TCONS_00149929    | XLOC_012321       | -             | lincRNA            | 3734 | chr19 | 42039291 | 42043950 | + | 3 | 0.71417 | 0.33482 | 0.26355 | 0.331533  | 0.0636556 | 0.700478  | 0.131107 | 0.683447  | 0.838297  |
| ENST00000601116.1 | ENSG00000268027.1 | AC006129.2    | lincRNA            | 601  | chr19 | 42055888 | 42057073 | + | 2 | 3.54825 | 8.01978 | 12.2123 | 10.574    | 3.25632   | 8.46302   | 7.30791  | 11.0343   | 15.2865   |
| TCONS_00147655    | XLOC_012322       | -             | lincRNA            | 2120 | chr19 | 42055895 | 42073129 | + | 2 | 1.11629 | 0.76216 | 3.88252 | 2.44988   | 1.36293   | 2.83054   | 1.80887  | 3.38529   | 3.4163    |
| TCONS_00143767    | XLOC_012322       | -             | lincRNA            | 1276 | chr19 | 42061702 | 42071557 | + | 2 | 2.65355 | 2.91719 | 3.12942 | 2.29261   | 2.14419   | 1.68414   | 1.82679  | 3.01523   | 4.53934   |
| TCONS_00141422    | XLOC_012325       | -             | lincRNA            | 1250 | chr19 | 42254416 | 42256085 | + | 2 | 0.874   | 1.01233 | 1.6668  | 0.366049  | 0.293495  | 0.469449  | 0.726546 | 0.922901  | 0.82684   |
| ENST00000593491.2 | ENSG00000213904.4 | LIPE-AS1      | anti-sense_lincRNA | 292  | chr19 | 42901280 | 42912604 | + | 2 | 7.49224 | 5.55903 | 6.48578 | 5.57908   | 4.16536   | 4.63016   | 6.9987   | 4.69436   | 5.85827   |
| TCONS_00150359    | XLOC_012340       | -             | lincRNA            | 1042 | chr19 | 42989256 | 42994046 | + | 2 | 1.57352 | 0.33708 | 0.58321 | 0.380564  | 1.17276   | 0.920506  | 0.279579 | 0.865077  | 1.03245   |
| ENST00000595748.1 | ENSG00000231412.2 | CTC-490G23.2  | lincRNA            | 301  | chr19 | 43833447 | 43835582 | - | 2 | 0       | 0.72469 | 0.73775 | 1.27493   | 1.89892   | 1.40999   | 0        | 0         | 0.593612  |
| TCONS_00141489    | XLOC_012381       | -             | lincRNA            | 434  | chr19 | 45690624 | 45691202 | + | 2 | 1.73051 | 0.925   | 0.92431 | 0.826336  | 0.805223  | 1.51752   | 0        | 1.78024   | 1.25975   |
| ENST00000602172.1 | ENSG00000268001.1 | CTC-241F20.3  | anti-sense_lincRNA | 1969 | chr19 | 48758932 | 48761456 | + | 2 | 2.88449 | 2.83814 | 4.73261 | 6.58575   | 4.6932    | 4.89126   | 7.42882  | 7.3684    | 6.92138   |
| TCONS_00145568    | XLOC_012481       | -             | lincRNA            | 298  | chr19 | 50998586 | 50998843 | + | 2 | 0       | 0.74656 | 4.56414 | 1.31267   | 1.30449   | 1.45199   | 1.31156  | 1.76161   | 1.22329   |
| TCONS_00148692    | XLOC_013278       | -             | lincRNA            | 1314 | chr19 | 52897979 | 52901003 | - | 2 | 2.60205 | 2.10283 | 2.32828 | 0.747465  | 2.10689   | 1.46729   | 1.60571  | 1.00777   | 0.596908  |
| ENST00000598892.1 | ENSG00000269834.1 | CTD-3018O17.3 | lincRNA            | 837  | chr19 | 52899892 | 52900922 | - | 2 | 1.21107 | 0.32735 | 0.98702 | 0.20136   | 0.476493  | 0.972618  | 0.417483 | 0.649116  | 0.410994  |
| TCONS_00145583    | XLOC_012510       | -             | lincRNA            | 515  | chr19 | 53400773 | 53401477 | + | 2 | 0       | 0       | 0.68005 | 0.61264   | 0.594502  | 2.24845   | 0.191459 | 0         | 0.186039  |
| TCONS_00141613    | XLOC_012515       | -             | lincRNA            | 1089 | chr19 | 53929410 | 53930648 | + | 2 | 1.03191 | 1.11701 | 0.63093 | 0.648723  | 1.38796   | 0.396226  | 0.992231 | 0.454921  | 0.71685   |
| TCONS_00145590    | XLOC_012518       | -             | lincRNA            | 270  | chr19 | 54016241 | 54016660 | + | 2 | 0       | 2.05473 | 3.17393 | 0         | 0         | 1.99156   | 0        | 0         | 1.68822   |
| TCONS_00149416    | XLOC_012521       | -             | lincRNA            | 222  | chr19 | 54383860 | 54384231 | + | 2 | 0       | 0       | 0       | 0         | 0         | 2.24343   | 2.17363  | 0         | 3.85728   |
| TCONS_00143958    | XLOC_012567       | -             | lincRNA            | 1146 | chr19 | 56826600 | 56828060 | + | 2 | 0.96987 | 0.1499  | 0.96291 | 0.203186  | 0.456338  | 0.372286  | 0.434781 | 0.34179   | 0.428529  |
| ENST00000434052.1 | ENSG00000142396.6 | ERVK3-1       | lincRNA            | 616  | chr19 | 58816743 | 58818000 | + | 2 | 8.79678 | 8.75703 | 10.2283 | 19.9188   | 11.2046   | 10.8746   | 10.0523  | 12.3986   | 10.3797   |
| ENST00000590505.1 | ENSG00000142396.6 | ERVK3-1       | lincRNA            | 3889 | chr19 | 58820396 | 58826569 | + | 2 | 9.57768 | 6.00932 | 9.90314 | 13.5618   | 10.3852   | 9.75597   | 9.26077  | 11.0061   | 9.94084   |
| TCONS_00148026    | XLOC_013363       | -             | anti-sense_lincRNA | 824  | chr19 | 58826344 | 58838866 | - | 3 | 0.16318 | 0.79777 | 0.45135 | 0.822271  | 0.594839  | 1.1304    | 1.13753  | 1.30209   | 1.02401   |
| TCONS_00148360    | XLOC_012608       | -             | intronic_lincRNA   | 294  | chr19 | 58887235 | 58890421 | + | 2 | 0       | 1.55536 | 2.38018 | 2.04954   | 0         | 2.26763   | 2.05377  | 0         | 0         |
| ENST00000450917.1 | ENSG00000235078.1 | AC142528.1    | lincRNA            | 974  | chr2  | 3523046  | 3526968  | + | 2 | 0.13165 | 0.82552 | 0.4536  | 0.165632  | 0.478709  | 0.455296  | 0.456795 | 0.314001  | 0.149841  |
| TCONS_00175299    | XLOC_013398       | -             | lincRNA            | 377  | chr2  | 7208111  | 7209221  | + | 2 | 0       | 0.82068 | 0.82399 | 0.364892  | 0.714779  | 0.40244   | 0        | 2.382     | 1.00628   |
| TCONS_00160638    | XLOC_013401       | -             | lincRNA            | 246  | chr2  | 7806502  | 7807793  | + | 2 | 0       | 0       | 0       | 0         | 2.54647   | 0         | 0        | 0         | 0         |
| ENST00000417930.1 | ENSG00000235576.1 | AC092580.4    | lincRNA            | 243  | chr2  | 7865932  | 7870836  | + | 2 | 2.00823 | 6.15148 | 14.4767 | 8.03463   | 2.71622   | 4.46435   | 8.44998  | 18.6574   | 8.89571   |
| TCONS_00170590    | XLOC_014411       | -             | lincRNA            | 1680 | chr2  | 8522936  | 8529824  | - | 2 | 0.79516 | 0.74541 | 0.72548 | 0.124856  | 0.236615  | 0.709238  | 0.403042 | 1.02813   | 1.10391   |
| TCONS_00161386    | XLOC_014411       | -             | lincRNA            | 1172 | chr2  | 8528727  | 8529994  | - | 2 | 0.78303 | 0.61326 | 0.6216  | 0.468898  | 0.463678  | 0.513222  | 0.592257 | 1.58865   | 1.05612   |
| TCONS_00164725    | XLOC_014412       | -             | lincRNA            | 432  | chr2  | 8532063  | 8533114  | - | 2 | 0       | 0.31105 | 0.62172 | 1.11135   | 0         | 0         | 0.790697 | 2.51466   | 1.01669   |
| TCONS_00177772    | XLOC_014413       | -             | lincRNA            | 2238 | chr2  | 8597767  | 8601351  | - | 2 | 0.75124 | 1.00582 | 0.44473 | 0.471071  | 0.30163   | 0.586681  | 0.286331 | 1.18359   | 1.10475   |
| TCONS_00158055    | XLOC_014414       | -             | lincRNA            | 8797 | chr2  | 8615250  | 8624353  | - | 2 | 0.89115 | 0.84514 | 1.01849 | 0.49845   | 0.72066   | 0.612983  | 0.797335 | 1.34208   | 1.6016    |
| TCONS_00161387    | XLOC_014415       | -             | lincRNA            | 1958 | chr2  | 8739268  | 8747680  | - | 2 | 0.58049 | 0.76427 | 0.35718 | 0.072824  | 0.0349827 | 0.320123  | 1.22932  | 0.457701  | 0.591353  |
| TCONS_00161401    | XLOC_014440       | -             | lincRNA            | 1021 | chr2  | 15126427 | 15138577 | - | 4 | 1.54227 | 0       | 0.42801 | 0.099918  | 1.24414   | 0.549538  | 0.238559 | 0.24655   | 0.0911174 |
| TCONS_00154096    | XLOC_014440       | -             | lincRNA            | 366  | chr2  | 15131415 | 15138363 | - | 3 | 5.81321 | 0       | 5.2833  | 3.00484   | 2.46315   | 1.54465   | 4.46284  | 3.82108   | 3.47851   |
| TCONS_00154104    | XLOC_014446       | -             | lincRNA            | 448  | chr2  | 17978966 | 17981543 | - | 3 | 3.67588 | 3.7773  | 4.64166 | 0.259787  | 2.02336   | 2.00343   | 2.70312  | 1.34083   | 3.56126   |
| TCONS_00176190    | XLOC_01           |               |                    |      |       |          |          |   |   |         |         |         |           |           |           |          |           |           |

|                   |                   |               |                    |      |      |          |          |   |   |         |         |         |           |          |           |          |          |           |
|-------------------|-------------------|---------------|--------------------|------|------|----------|----------|---|---|---------|---------|---------|-----------|----------|-----------|----------|----------|-----------|
| TCONS_00161411    | XLOC_014448       | -             | lincRNA            | 614  | chr2 | 19284308 | 19325147 | - | 2 | 0.59148 | 0.26426 | 1.32115 | 0.555409  | 0.541963 | 1.65906   | 0.144318 | 1.18666  | 1.12762   |
| TCONS_00154106    | XLOC_014448       | -             | lincRNA            | 2021 | chr2 | 19324943 | 19430218 | - | 2 | 2.61112 | 1.14422 | 0.47072 | 0.366287  | 0.992458 | 1.2857    | 0.513086 | 0.618499 | 0.507406  |
| TCONS_00173215    | XLOC_014449       | -             | lincRNA            | 1308 | chr2 | 19545234 | 19547780 | - | 2 | 5.52227 | 2.94116 | 4.73655 | 0.924947  | 5.33861  | 3.81272   | 3.17583  | 3.71527  | 3.81226   |
| TCONS_00154119    | XLOC_014456       | -             | lincRNA            | 381  | chr2 | 20259571 | 20260576 | - | 2 | 1.67273 | 0.40105 | 3.21997 | 0         | 0.34928  | 1.57381   | 0.685256 | 1.39617  | 0.327819  |
| TCONS_00164127    | XLOC_013459       | -             | lincRNA            | 563  | chr2 | 20813859 | 20815459 | + | 2 | 0.55965 | 0.59147 | 0.58792 | 0.354142  | 0.343104 | 0         | 0.826428 | 0.22629  | 0         |
| TCONS_00170135    | XLOC_013461       | -             | lincRNA            | 877  | chr2 | 21782778 | 21788485 | + | 2 | 0.60179 | 0.31492 | 0.31166 | 0.378859  | 0.273939 | 1.14572   | 0        | 0.239746 | 0.771694  |
| TCONS_00152947    | XLOC_013467       | -             | lincRNA            | 1788 | chr2 | 24286630 | 24290022 | + | 2 | 0.83532 | 0.44546 | 0.30771 | 0.161259  | 0.774822 | 0.487368  | 0.257663 | 0.304193 | 0.400205  |
| TCONS_00165304    | XLOC_013471       | -             | lincRNA            | 2783 | chr2 | 24714141 | 24789615 | + | 2 | 3.83382 | 2.87173 | 3.26307 | 2.99762   | 3.02067  | 4.24659   | 1.82763  | 3.14094  | 3.43994   |
| TCONS_00176201    | XLOC_013476       | -             | anti-sense_lincRNA | 451  | chr2 | 25643807 | 25650500 | + | 2 | 0       | 0.28702 | 0.28654 | 2.30994   | 0.249906 | 1.131     | 2.18394  | 1.98632  | 2.11066   |
| TCONS_00158887    | XLOC_013481       | -             | anti-sense_lincRNA | 1197 | chr2 | 26521813 | 26531431 | + | 2 | 0       | 0.1846  | 0       | 0         | 0.247565 | 0         | 0.424904 | 0        | 0         |
| TCONS_00175323    | XLOC_013481       | -             | lincRNA            | 3245 | chr2 | 26521873 | 26528819 | + | 2 | 1.40832 | 0.8443  | 1.57762 | 0.336202  | 0.988229 | 0.80808   | 0.703572 | 1.37101  | 1.26911   |
| TCONS_00164156    | XLOC_013506       | -             | intronic_lincRNA   | 283  | chr2 | 28005525 | 28008023 | + | 2 | 3.52796 | 0.87683 | 0.898   | 2.30599   | 1.53463  | 0.851104  | 3.88459  | 0        | 0         |
| TCONS_00169271    | XLOC_014517       | -             | anti-sense_lincRNA | 439  | chr2 | 28970695 | 28974649 | - | 3 | 0       | 0.30174 | 0.90428 | 0.539283  | 1.31332  | 0.594183  | 1.02184  | 0.348314 | 0.49312   |
| TCONS_00157344    | XLOC_013538       | -             | lincRNA            | 982  | chr2 | 34938429 | 34947635 | + | 2 | 0.1303  | 0.63546 | 0       | 0.327867  | 0.315851 | 3.33461   | 0.753414 | 0.207167 | 0.148297  |
| ENST00000414796.1 | ENSG00000237320.1 | AC019064.1    | lincRNA            | 494  | chr2 | 35223345 | 35225227 | - | 3 | 0.34501 | 0       | 0       | 1.53224   | 1.06298  | 1.68731   | 0.41141  | 0.662215 | 0         |
| TCONS_00162172    | XLOC_013545       | -             | lincRNA            | 4119 | chr2 | 37827064 | 37835128 | + | 2 | 2.29306 | 2.21563 | 4.27861 | 1.22432   | 1.67613  | 1.47072   | 1.75203  | 4.27856  | 3.11887   |
| TCONS_00158160    | XLOC_014563       | -             | lincRNA            | 475  | chr2 | 38696555 | 38742632 | - | 4 | 1.77182 | 1.16771 | 0.52014 | 0.702346  | 0.302449 | 0.709537  | 0.552807 | 7.09E-05 | 1.04999   |
| TCONS_00158161    | XLOC_014563       | -             | lincRNA            | 925  | chr2 | 38722740 | 38742632 | - | 2 | 0.16776 | 1.13003 | 0.48511 | 0         | 0.142406 | 0.218612  | 0.528343 | 0.670973 | 0.0868494 |
| TCONS_00157354    | XLOC_013555       | -             | lincRNA            | 426  | chr2 | 40767542 | 40772888 | + | 2 | 0.44778 | 0.31949 | 0.63885 | 0.570537  | 0        | 0.314361  | 0.812799 | 0        | 1.56648   |
| TCONS_00164826    | XLOC_014578       | -             | lincRNA            | 674  | chr2 | 42370183 | 42375162 | - | 2 | 0.21459 | 0.3009  | 0.89531 | 1.21896   | 0.523571 | 0.447028  | 0.753447 | 0.34448  | 0.491598  |
| TCONS_00160744    | XLOC_013560       | -             | lincRNA            | 2386 | chr2 | 43036908 | 43056061 | + | 2 | 0.51364 | 0.51727 | 0.82901 | 0.439151  | 0.534196 | 0.450399  | 0.373573 | 0.698637 | 0.501681  |
| TCONS_00153084    | XLOC_013569       | -             | intronic_lincRNA   | 2424 | chr2 | 44625863 | 44628420 | + | 2 | 3.12105 | 1.71588 | 2.50703 | 1.928     | 3.20554  | 3.85777   | 1.80955  | 3.07185  | 2.85472   |
| TCONS_00175357    | XLOC_013569       | -             | intronic_lincRNA   | 1485 | chr2 | 44718310 | 44722973 | + | 2 | 2.46082 | 2.47922 | 1.57746 | 1.1462    | 2.5875   | 3.12215   | 1.32155  | 2.82333  | 2.4299    |
| ENST00000437916.2 | ENSG00000259439.1 | RP11-89K21.1  | lincRNA            | 2880 | chr2 | 45148216 | 45166338 | - | 2 | 3.07309 | 2.504   | 2.09247 | 1.83848   | 4.53857  | 2.54326   | 2.57694  | 4.48579  | 1.99215   |
| TCONS_00163261    | XLOC_014588       | -             | lincRNA            | 1156 | chr2 | 45164494 | 45166375 | - | 2 | 1.52814 | 0.74163 | 2.01426 | 0.737206  | 3.09625  | 1.33062   | 2.5492   | 2.14054  | 1.72387   |
| TCONS_00172826    | XLOC_013577       | -             | intronic_lincRNA   | 1206 | chr2 | 46072990 | 46128465 | + | 3 | 4.25669 | 2.39552 | 3.68952 | 1.7194    | 3.18661  | 2.73019   | 2.39285  | 2.65002  | 3.68301   |
| TCONS_00172827    | XLOC_013577       | -             | intronic_lincRNA   | 1574 | chr2 | 46086304 | 46089319 | + | 2 | 5.56856 | 2.26648 | 3.61029 | 1.81749   | 2.5984   | 2.97075   | 2.17223  | 2.22866  | 2.73466   |
| TCONS_00161502    | XLOC_014597       | -             | lincRNA            | 356  | chr2 | 46482455 | 46483944 | - | 2 | 0.64528 | 0.46701 | 2.35059 | 0.828607  | 0.406891 | 0.914341  | 1.60521  | 0        | 0         |
| TCONS_00160757    | XLOC_013580       | -             | lincRNA            | 210  | chr2 | 46484923 | 46485349 | + | 2 | 0       | 0       | 6.64375 | 0         | 0        | 2.99218   | 0        | 0        | 0         |
| TCONS_00155291    | XLOC_013582       | -             | lincRNA            | 1719 | chr2 | 46636474 | 46639918 | + | 2 | 4.09737 | 0.46576 | 2.52818 | 0.295037  | 0.445582 | 0.185289  | 0.192472 | 0.212064 | 0.152164  |
| TCONS_00160762    | XLOC_013589       | -             | lincRNA            | 378  | chr2 | 47533502 | 47552982 | + | 2 | 2.26733 | 2.03989 | 2.86706 | 0         | 1.77664  | 0.800311  | 1.04629  | 0.947198 | 1.33396   |
| TCONS_00164834    | XLOC_014606       | -             | lincRNA            | 227  | chr2 | 48223738 | 48230473 | - | 2 | 0       | 0       | 0       | 1.81013   | 0        | 0         | 0        | 0        | 0         |
| TCONS_00173289    | XLOC_014607       | -             | lincRNA            | 450  | chr2 | 48540539 | 48541337 | - | 2 | 0.81039 | 0.28819 | 0.2877  | 4.12311   | 3.26107  | 0.851676  | 1.70574  | 0.332426 | 1.17738   |
| TCONS_00161514    | XLOC_014619       | -             | lincRNA            | 266  | chr2 | 53832024 | 53833293 | - | 2 | 0       | 0       | 2.23519 | 0.946493  | 0.950572 | 1.04946   | 0.971409 | 0        | 0         |
| TCONS_00157394    | XLOC_013613       | -             | lincRNA            | 562  | chr2 | 56812845 | 56816771 | + | 3 | 0       | 0.98854 | 0.98265 | 0.177563  | 0.172033 | 0.39089   | 1.32606  | 0.453864 | 0.323027  |
| TCONS_00167344    | XLOC_013614       | -             | lincRNA            | 519  | chr2 | 57982897 | 57992339 | + | 2 | 0.95448 | 0.67444 | 0       | 0.201638  | 0        | 1.11002   | 0        | 0.775287 | 0.183665  |
| TCONS_00163312    | XLOC_014638       | -             | anti-sense_lincRNA | 1730 | chr2 | 58267079 | 58274263 | - | 2 | 1.20038 | 1.75712 | 1.96229 | 1.04612   | 0.924949 | 1.1957    | 0.879004 | 2.05267  | 1.81279   |
| TCONS_00167906    | XLOC_014651       | -             | lincRNA            | 243  | chr2 | 62508896 | 62520656 | - | 2 | 0       | 0       | 0       | 0         | 1.35811  | 1.48812   | 5.63332  | 0        | 0         |
| TCONS_00164234    | XLOC_013631       | -             | anti-sense_lincRNA | 1064 | chr2 | 62668767 | 62728453 | + | 2 | 0.47186 | 0.24633 | 0.48703 | 1.2609    | 0.571353 | 0.896997  | 0.408539 | 1.77926  | 1.34132   |
| TCONS_00159019    | XLOC_013634       | -             | lincRNA            | 908  | chr2 | 62677350 | 62691002 | + | 2 | 1.15104 | 0.40137 | 0.99282 | 0.362227  | 0.610977 | 0.697053  | 0.416762 | 1.2601   | 0.573719  |
| TCONS_00177460    | XLOC_013641       | -             | lincRNA            | 431  | chr2 | 64500854 | 64550978 | + | 2 | 0.43819 | 2.4994  | 0.93676 | 0.837146  | 0.271976 | 0.922461  | 0.794298 | 0        | 2.55298   |
| TCONS_00160811    | XLOC_013647       | -             | lincRNA            | 2061 | chr2 | 65257871 | 65260064 | + | 2 | 0.65808 | 1.06377 | 1.61162 | 4.60889   | 1.28858  | 4.42231   | 1.66283  | 6.22427  | 6.17481   |
| TCONS_00161565    | XLOC_014668       | -             | lincRNA            | 4047 | chr2 | 65271564 | 65283312 | - | 2 | 1.24761 | 1.1928  | 1.15754 | 1.1142    | 1.00538  | 0.895304  | 0.862207 | 1.14706  | 1.03413   |
| TCONS_00164868    | XLOC_014673       | -             | lincRNA            | 357  | chr2 | 65807329 | 65807995 | - | 2 | 0.64125 | 0.46396 | 0       | 0.823307  | 0        | 0         | 0        | 2.16054  | 0         |
| TCONS_00156445    | XLOC_014686       | -             | lincRNA            | 886  | chr2 | 68813632 | 68817466 | - | 2 | 0.89088 | 0.41434 | 1.64011 | 0.0934688 | 0.36042  | 0.102785  | 1.11895  | 0.473115 | 0.253829  |
| TCONS_00171289    | XLOC_013667       | -             | lincRNA            | 1863 | chr2 | 69871322 | 69881276 | + | 2 | 2.51581 | 1.19084 | 1.55273 | 1.53978   | 1.96036  | 2.49599   | 2.21362  | 2.46837  | 1.07681   |
| TCONS_00164878    | XLOC_014691       | -             | lincRNA            | 1255 | chr2 | 70321030 | 70322401 | - | 2 | 0.67657 | 0.53734 | 0.59718 | 0.242874  | 0.525774 | 0.133491  | 0.556203 | 0.995029 | 0.987481  |
| TCONS_00161595    | XLOC_014714       | -             | lincRNA            | 3914 | chr2 | 73530220 | 73534973 | - | 2 | 0.90733 | 0.74135 | 0.91806 | 0.155031  | 2.0498   | 0.511009  | 1.80204  | 0.799363 | 1.00912   |
| TCONS_00177473    | XLOC_013688       | -             | lincRNA            | 1368 | chr2 | 73954375 | 73956205 | + | 2 | 2.79419 | 0.36383 | 2.21575 | 0.0548347 | 0.2637   | 0.602737  | 0.451648 | 0.552609 | 1.83251   |
| ENST00000439192.1 | ENSG00000237883.1 | DGUOK-AS1     | anti-sense_lincRNA | 563  | chr2 | 74185097 | 74208560 | - | 2 | 3.55787 | 0.59147 | 2.14365 | 2.12485   | 2.23018  | 2.72864   | 1.48757  | 0.678871 | 0.644247  |
| TCONS_00156481    | XLOC_014717       | -             | anti-sense_lincRNA | 826  | chr2 | 74185273 | 74209921 | - | 2 | 1.95195 | 0.4544  | 0.7873  | 0.102455  | 0.790561 | 0.901418  | 1.41728  | 0.908505 | 0.742333  |
| ENST00000604271.2 | ENSG00000270571.2 | RP11-355F16.1 | intronic_lincRNA   | 3438 | chr2 | 75381492 | 75417075 | + | 3 | 10.9739 | 12.0817 | 5.56787 | 19.1271   | 2.93958  | 4.75465   | 1.83417  | 2.28063  | 3.52658   |
| TCONS_00165548    | XLOC_013709       | -             | lincRNA            | 2638 | chr2 | 75502690 | 75506805 | + | 2 | 1.88427 | 2.20249 | 0.91447 | 7.74323   | 1.13412  | 1.55749   | 1.17168  | 1.38411  | 1.75149   |
| TCONS_00160878    | XLOC_013741       | -             | lincRNA            | 3088 | chr2 | 87883252 | 87907659 | + | 2 | 0.34843 | 0.83618 | 1.18491 | 1.04577   | 0.910902 | 0.742721  | 0.335921 | 0.512934 | 0.797777  |
| TCONS_00162367    | XLOC_013741       | -             | lincRNA            | 1849 | chr2 | 87883259 | 88003920 | + | 4 | 0.68962 | 1.53592 | 1.51755 | 5.31075   | 2.24453  | 2.3675    | 1.07538  | 1.44249  | 1.40333   |
| TCONS_00165572    | XLOC_013741       | -             | lincRNA            | 1161 | chr2 | 88004008 | 88014481 | + | 5 | 0.84868 | 1.03284 | 1.02065 | 3.66681   | 1.02668  | 1.46584   | 1.10034  | 0.336403 | 0.843602  |
| TCONS_00160879    | XLOC_013745       | -             | lincRNA            | 818  | chr2 | 88316288 | 88320932 | + | 2 | 1.15333 | 1.03576 | 1.70923 | 1.03785   | 2.40267  | 2.05456   | 1.14879  | 3.02432  | 0.940037  |
| TCONS_00158314    | XLOC_014776       | -             | lincRNA            | 1802 | chr2 | 88986743 | 88990990 | - | 2 | 1.2102  | 1.10387 | 1.43789 | 0.439581  | 0.844829 | 1.09796   | 1.09455  | 0.703544 | 0.613074  |
| TCONS_00165587    | XLOC_013757       | -             | lincRNA            | 437  | chr2 | 89326527 | 89384968 | + | 2 | 0       | 0       | 0       | 4.62287   | 0        | 4.19474   | 0        | 0        | 0         |
| TCONS_00164313    | XLOC_013760       | -             | lincRNA            | 2009 | chr2 | 89620047 | 89622327 | + | 2 | 0.11283 | 0.03909 | 0.07712 | 0.459997  | 0.10198  | 0.0388856 | 0.064564 | 0.222365 | 0.319239  |
| TCONS_00156537    | XLOC_014786       | -             | lincRNA            | 2200 | chr2 | 92317053 | 92325368 | - | 3 | 18.0656 | 10.0377 |         |           |          |           |          |          |           |

|                   |                   |            |                    |       |      |           |           |   |   |         |         |         |           |           |           |          |          |           |
|-------------------|-------------------|------------|--------------------|-------|------|-----------|-----------|---|---|---------|---------|---------|-----------|-----------|-----------|----------|----------|-----------|
| TCNS_00160889     | XLOC_013777       | -          | lincRNA            | 1696  | chr2 | 95873229  | 95875737  | + | 2 | 1.03551 | 1.6212  | 1.59495 | 0.671605  | 1.46432   | 0.739448  | 1.06865  | 1.05994  | 0.827442  |
| ENST00000425953.1 | ENSG00000233757.2 | AC092835.2 | lincRNA            | 1096  | chr2 | 95873283  | 95880597  | + | 5 | 4.64343 | 3.46095 | 4.2902  | 4.1699    | 4.02096   | 3.32416   | 2.14347  | 3.63877  | 3.01162   |
| ENST00000421534.1 | ENSG00000230747.1 | AC021188.4 | lincRNA            | 740   | chr2 | 96973001  | 96987469  | - | 2 | 0.75386 | 1.45064 | 2.74428 | 1.30711   | 1.03253   | 1.82993   | 1.09876  | 1.50819  | 2.69307   |
| TCNS_00173379     | XLOC_014808       | -          | intronic_lincRNA   | 1474  | chr2 | 97395393  | 97397177  | - | 2 | 3.04251 | 2.16732 | 2.46908 | 0.45239   | 1.40165   | 1.16026   | 1.74681  | 1.20246  | 1.13471   |
| ENST00000608565.1 | ENSG00000230606.6 | AC159540.1 | lincRNA            | 855   | chr2 | 98087740  | 98088981  | - | 3 | 1.08839 | 0.43412 | 1.28909 | 0.881148  | 0.755254  | 1.83037   | 0.360894 | 0.991659 | 1.24108   |
| ENST00000609004.1 | ENSG00000228486.5 | AC017099.3 | lincRNA            | 1031  | chr2 | 98285643  | 98288169  | + | 2 | 0.98111 | 1.36627 | 1.18202 | 1.07972   | 0.594198  | 0.932729  | 0.779169 | 0.779252 | 1.67393   |
| TCNS_00154516     | XLOC_014821       | -          | lincRNA            | 559   | chr2 | 98670692  | 98701316  | - | 2 | 2.5463  | 1.59508 | 1.38749 | 0.179054  | 0         | 0.59127   | 0.501572 | 0.457756 | 0.488652  |
| TCNS_00163498     | XLOC_014824       | -          | lincRNA            | 501   | chr2 | 99385370  | 99388442  | - | 2 | 1.14975 | 2.01226 | 2.67061 | 0.443632  | 1.76667   | 1.2277    | 3.29588  | 1.51373  | 2.06646   |
| TCNS_00173395     | XLOC_014824       | -          | lincRNA            | 921   | chr2 | 99385370  | 99389619  | - | 4 | 0.50707 | 0.351   | 0.17126 | 0.348985  | 0.298935  | 0.1744479 | 1.43849  | 0.391684 | 0.434114  |
| TCNS_00160079     | XLOC_014837       | -          | intronic_lincRNA   | 965   | chr2 | 101876793 | 101878316 | - | 2 | 2.13103 | 2.4131  | 0.73439 | 1.59206   | 0.645844  | 1.01347   | 1.38676  | 2.01236  | 1.66779   |
| TCNS_00160954     | XLOC_013845       | -          | lincRNA            | 662   | chr2 | 107318017 | 107394600 | + | 3 | 1.32082 | 0.46322 | 3.36973 | 0         | 0.403005  | 1.98772   | 0.515694 | 1.59125  | 0.12613   |
| TCNS_00163542     | XLOC_014852       | -          | anti-sense_lincRNA | 877   | chr2 | 109115549 | 109116613 | - | 2 | 2.40716 | 0.73481 | 1.45443 | 0.473574  | 0.913129  | 1.04156   | 1.30858  | 0.719238 | 1.02892   |
| ENST00000440975.1 | ENSG00000214184.3 | AC012487.2 | lincRNA            | 574   | chr2 | 109128145 | 109150638 | - | 2 | 0.81492 | 1.3389  | 0.57022 | 0.171837  | 0         | 0.378261  | 0.641056 | 0.219466 | 0         |
| TCNS_00153422     | XLOC_013878       | -          | lincRNA            | 542   | chr2 | 114082824 | 114086490 | + | 2 | 5.04725 | 0.41891 | 1.24993 | 0         | 0.364524  | 0.413922  | 0.175801 | 1.20285  | 0.513339  |
| TCNS_00157608     | XLOC_013888       | -          | lincRNA            | 2048  | chr2 | 118596879 | 118599846 | + | 2 | 1.10451 | 1.53039 | 0.60391 | 0.45028   | 0.765296  | 1.10385   | 0.600329 | 1.1753   | 1.12493   |
| TCNS_00167493     | XLOC_013899       | -          | lincRNA            | 1894  | chr2 | 120460703 | 120509900 | + | 4 | 2.53007 | 1.33597 | 1.44178 | 0.340103  | 1.37973   | 0.664472  | 1.41406  | 1.23523  | 1.32983   |
| TCNS_00162494     | XLOC_013915       | -          | lincRNA            | 854   | chr2 | 126468474 | 126502713 | + | 2 | 0.46716 | 0.21739 | 0.64555 | 0.0980554 | 0.661866  | 0.107834  | 0.722912 | 1.73809  | 1.59813   |
| TCNS_00153471     | XLOC_013915       | -          | lincRNA            | 2214  | chr2 | 126543818 | 126551502 | + | 2 | 0.96289 | 0.0351  | 0.6924  | 0.095338  | 0.763087  | 0.558759  | 1.65165  | 2.55521  | 2.00658   |
| TCNS_00153474     | XLOC_013919       | -          | lincRNA            | 385   | chr2 | 128158192 | 128163635 | + | 2 | 1.09139 | 1.1765  | 0.78684 | 0.698014  | 0         | 0         | 2.00863  | 0.45487  | 0.641092  |
| TCNS_00170807     | XLOC_014906       | -          | lincRNA            | 3671  | chr2 | 128226623 | 128230409 | - | 2 | 1.32384 | 0.97641 | 0.92234 | 0.387078  | 0.937563  | 1.3569    | 0.838537 | 0.994201 | 1.27924   |
| TCNS_00164431     | XLOC_013939       | -          | lincRNA            | 2411  | chr2 | 131669782 | 131673798 | + | 2 | 1.9852  | 0.22374 | 1.48158 | 1.21571   | 1.83459   | 1.36771   | 0.369325 | 0.836115 | 0.443784  |
| TCNS_00161047     | XLOC_013963       | -          | lincRNA            | 647   | chr2 | 140681627 | 140727323 | + | 2 | 0.45498 | 1.11756 | 2.5346  | 0         | 0.694503  | 0         | 0.533478 | 0.182865 | 0.130416  |
| TCNS_00158492     | XLOC_014953       | -          | intronic_lincRNA   | 4548  | chr2 | 145077118 | 145082359 | - | 2 | 3.24131 | 1.99675 | 2.9117  | 2.33934   | 3.10577   | 2.87736   | 1.8195   | 2.23214  | 2.87704   |
| TCNS_00153526     | XLOC_013969       | -          | lincRNA            | 3500  | chr2 | 145946300 | 145950988 | + | 2 | 2.97044 | 1.69041 | 2.06708 | 1.41532   | 0.967621  | 1.46987   | 1.19972  | 1.04587  | 0.751461  |
| TCNS_00153536     | XLOC_013980       | -          | intronic_lincRNA   | 1371  | chr2 | 150225831 | 150235195 | + | 2 | 2.52576 | 0.96772 | 0.65704 | 0.328164  | 1.63073   | 0.721427  | 0.700745 | 1.17126  | 0.543397  |
| TCNS_00153537     | XLOC_013980       | -          | lincRNA            | 898   | chr2 | 150338675 | 150342835 | + | 2 | 1.45935 | 0.40716 | 0.10072 | 0         | 0.354173  | 0.606066  | 0.33827  | 0.581089 | 0.24943   |
| TCNS_00164455     | XLOC_013981       | -          | lincRNA            | 378   | chr2 | 150600233 | 150685364 | + | 3 | 0.56683 | 0.81596 | 0.81916 | 2.5398    | 0.355327  | 1.20047   | 1.04629  | 0        | 0.333491  |
| TCNS_00155672     | XLOC_013982       | -          | lincRNA            | 1352  | chr2 | 151283054 | 151284611 | + | 2 | 5.52198 | 3.97074 | 8.71073 | 0.474977  | 1.95469   | 0.305564  | 1.75392  | 3.55823  | 2.98792   |
| TCNS_00155673     | XLOC_013982       | -          | lincRNA            | 9015  | chr2 | 151283064 | 151294144 | + | 3 | 2.40601 | 2.12394 | 4.84458 | 0.395113  | 1.1165    | 0.127535  | 1.11718  | 2.31959  | 2.08154   |
| TCNS_00159287     | XLOC_013985       | -          | anti-sense_lincRNA | 2389  | chr2 | 152354074 | 152359955 | + | 2 | 2.65796 | 2.16308 | 2.86569 | 1.43259   | 2.24615   | 2.4738    | 2.79152  | 3.23134  | 2.68953   |
| TCNS_00161074     | XLOC_013985       | -          | anti-sense_lincRNA | 2592  | chr2 | 152357157 | 152362772 | + | 2 | 1.23764 | 1.06339 | 1.80599 | 1.23066   | 1.20736   | 1.11711   | 0.883338 | 1.47802  | 1.61638   |
| TCNS_00177994     | XLOC_014967       | -          | lincRNA            | 3651  | chr2 | 152630516 | 152643606 | - | 2 | 4.76383 | 2.59841 | 3.67045 | 1.29774   | 3.18487   | 4.2369    | 1.82177  | 2.67436  | 2.60675   |
| TCNS_00169711     | XLOC_014968       | -          | intronic_lincRNA   | 643   | chr2 | 152826505 | 152828265 | - | 2 | 0.45907 | 0.96667 | 0.47962 | 0.579833  | 2.52308   | 0.95699   | 0.807644 | 0.369103 | 0.263217  |
| TCNS_00173509     | XLOC_014973       | -          | lincRNA            | 469   | chr2 | 156666443 | 156769661 | - | 5 | 0.00029 | 1.07045 | 0       | 0.2393    | 0.0003624 | 0         | 3.08117  | 2.8843   | 0.0430999 |
| TCNS_00158513     | XLOC_014973       | -          | lincRNA            | 525   | chr2 | 156666453 | 156769650 | - | 5 | 1.0071  | 3.09385 | 1.85456 | 6.02E-05  | 0.909545  | 0         | 0        | 1.08361  | 0         |
| TCNS_00158514     | XLOC_014973       | -          | lincRNA            | 879   | chr2 | 156696869 | 156769624 | - | 4 | 1.09765 | 0.75782 | 1.71563 | 0         | 0.118932  | 0         | 0.466451 | 1.05319  | 0.285304  |
| TCNS_00161790     | XLOC_014973       | -          | lincRNA            | 581   | chr2 | 156762579 | 156769661 | - | 3 | 1.98869 | 0.70044 | 0.30706 | 0         | 0.972434  | 0         | 0.312079 | 0.334442 | 0.531393  |
| TCNS_00154706     | XLOC_014975       | -          | lincRNA            | 16334 | chr2 | 156865822 | 156882927 | - | 2 | 9.45996 | 3.09929 | 5.93686 | 0.682786  | 3.5324    | 0.266666  | 3.28176  | 3.05152  | 1.41564   |
| TCNS_00156737     | XLOC_014975       | -          | lincRNA            | 3559  | chr2 | 156875897 | 156881879 | - | 3 | 1.68848 | 0.81955 | 1.74357 | 0.129198  | 0.485978  | 0         | 0.357555 | 0.254978 | 0.118549  |
| TCNS_00173513     | XLOC_014975       | -          | lincRNA            | 2966  | chr2 | 156875933 | 156880352 | - | 3 | 0       | 0       | 0       | 0         | 0         | 0         | 0.621599 | 0        | 0         |
| ENST00000428651.1 | ENSG00000226383.1 | AC093375.1 | lincRNA            | 1603  | chr2 | 156877047 | 156881088 | - | 3 | 2.57976 | 1.61089 | 0.78784 | 0.45454   | 1.27418   | 0.0381089 | 1.28412  | 1.86973  | 0.804267  |
| ENST00000442666.1 | ENSG00000204380.2 | AC005042.4 | anti-sense_lincRNA | 825   | chr2 | 159535168 | 159591330 | - | 2 | 1.14045 | 0.56892 | 0.45062 | 2.25762   | 1.97959   | 0.67715   | 2.83918  | 1.94996  | 1.48706   |
| TCNS_00156795     | XLOC_014990       | -          | lincRNA            | 884   | chr2 | 161411205 | 161504883 | - | 2 | 1.63804 | 0.41556 | 0.71968 | 1.59363   | 3.0726    | 3.19568   | 0.517977 | 0.474517 | 0.169718  |
| ENST00000436506.1 | ENSG00000227403.1 | AC009299.3 | lincRNA            | 765   | chr2 | 162101266 | 162103965 | + | 3 | 2.70237 | 3.14961 | 5.11706 | 1.81685   | 4.49349   | 3.99676   | 3.7767   | 4.32101  | 4.01345   |
| TCNS_00156810     | XLOC_015004       | -          | lincRNA            | 2828  | chr2 | 166688806 | 166695401 | - | 2 | 8.27457 | 3.27943 | 2.70343 | 1.3879    | 1.58961   | 1.79259   | 2.26187  | 1.8644   | 1.9539    |
| TCNS_00173563     | XLOC_015027       | -          | lincRNA            | 324   | chr2 | 173139821 | 173144533 | - | 2 | 0       | 0.59009 | 0.5973  | 0         | 0         | 0         | 0        | 1.38249  | 0.96568   |
| ENST00000450443.1 | ENSG00000225205.1 | AC093818.1 | anti-sense_lincRNA | 1397  | chr2 | 173368167 | 173421324 | - | 3 | 0.68165 | 0.65079 | 1.63586 | 4.92238   | 1.33786   | 5.35173   | 1.56656  | 6.67156  | 7.00666   |
| TCNS_00164508     | XLOC_014058       | -          | lincRNA            | 233   | chr2 | 173585551 | 173588988 | + | 2 | 0       | 0       | 0       | 3.21124   | 0         | 1.78608   | 0        | 0        | 0         |
| ENST00000417038.1 | ENSG00000226853.2 | AC010894.3 | lincRNA            | 393   | chr2 | 175352131 | 175353028 | + | 2 | 1.57014 | 0       | 1.88213 | 0         | 0.327     | 0.737471  | 0.64016  | 0.870366 | 0.30692   |
| TCNS_00165101     | XLOC_015047       | -          | lincRNA            | 348   | chr2 | 177626222 | 177628949 | - | 2 | 0       | 0       | 0.99342 | 1.31033   | 0         | 1.92831   | 0        | 0.574588 | 0         |
| TCNS_00158588     | XLOC_015049       | -          | lincRNA            | 390   | chr2 | 177976434 | 178016097 | - | 2 | 0.53153 | 1.90798 | 1.14788 | 0.679515  | 0.332302  | 0.374621  | 2.6035   | 0.442365 | 0         |
| ENST00000419129.1 | ENSG00000237477.1 | AC093911.1 | lincRNA            | 552   | chr2 | 180138558 | 180150434 | + | 2 | 7.21285 | 1.42388 | 1.41578 | 0         | 0.177     | 0         | 1.02379  | 0        | 0.332349  |
| TCNS_00173056     | XLOC_014088       | -          | lincRNA            | 261   | chr2 | 180275910 | 180278620 | + | 2 | 1.53566 | 0       | 0       | 0         | 1.01976   | 2.24826   | 1.04524  | 4.17511  | 0         |
| TCNS_00164524     | XLOC_014091       | -          | lincRNA            | 1107  | chr2 | 181988362 | 182091958 | + | 2 | 0.22477 | 1.0947  | 1.62301 | 1.27164   | 0.680119  | 0.621345  | 1.426    | 2.58563  | 1.91601   |
| TCNS_00165120     | XLOC_015067       | -          | lincRNA            | 538   | chr2 | 183536587 | 183539207 | - | 3 | 1.50194 | 0.42395 | 1.26511 | 0.760963  | 2.39792   | 0.628287  | 1.2457   | 0        | 0.346342  |
| TCNS_00169882     | XLOC_015071       | -          | anti-sense_lincRNA | 1163  | chr2 | 186585307 | 186623219 | - | 3 | 3.10487 | 1.06035 | 1.15195 | 0.718642  | 2.20645   | 1.32347   | 1.6336   | 2.30287  | 1.32289   |
| TCNS_00160359     | XLOC_015071       | -          | anti-sense_lincRNA | 3225  | chr2 | 186620919 | 186650285 | - | 2 | 3.83675 | 1.50811 | 2.94982 | 1.06178   | 2.58948   | 2.29863   | 2.46866  | 2.88123  | 1.56353   |
| ENST00000419719.1 | ENSG00000237877.2 | AC097500.2 | lincRNA            | 587   | chr2 | 186898258 | 186947950 | - | 5 | 10.5026 | 4.24939 | 4.58853 | 5.81127   | 6.10871   | 7.30937   | 4.48655  | 8.47653  | 5.58437   |
| TCNS_00177641     | XLOC_014105       | -          | lincRNA            | 1390  | chr2 | 187868031 | 188057889 | + | 2 | 1.1999  | 0.83317 | 1.11663 | 1.77604   | 0.983444  | 0.709884  | 1.13265  | 1.89809  | 1.94429</ |

|                   |                    |              |                    |      |       |           |           |   |   |         |         |         |           |          |          |           |          |          |
|-------------------|--------------------|--------------|--------------------|------|-------|-----------|-----------|---|---|---------|---------|---------|-----------|----------|----------|-----------|----------|----------|
| TCNS_00154898     | XLOC_015095        | -            | lincRNA            | 1032 | chr2  | 192073829 | 192108934 | - | 2 | 1.95986 | 1.10875 | 1.43357 | 1.00139   | 0.445109 | 1.0163   | 0.636725  | 1.36203  | 0.417976 |
| ENST00000594798.1 | ENSG00000233766.3  | AC098617.1   | intronic_lincRNA   | 629  | chr2  | 192899510 | 192908909 | + | 2 | 1.18493 | 0.66575 | 0.82599 | 1.79651   | 1.73768  | 1.15315  | 1.11301   | 0.953539 | 0.815759 |
| ENST00000449346.1 | ENSG00000231621.1  | AC013264.2   | intronic_lincRNA   | 455  | chr2  | 198062715 | 198063997 | + | 2 | 14.3035 | 18.9222 | 15.2209 | 4.29431   | 5.16234  | 5.28717  | 13.843    | 8.1418   | 12.6918  |
| TCNS_00164563     | XLOC_014135        | -            | lincRNA            | 464  | chr2  | 198562583 | 198563590 | + | 2 | 0       | 0.2726  | 0.27194 | 0.975747  | 1.42361  | 0        | 0.920652  | 1.25672  | 0.668193 |
| TCNS_00157071     | XLOC_015146        | -            | lincRNA            | 580  | chr2  | 206959579 | 206960748 | - | 2 | 1.0695  | 0.37642 | 1.30901 | 0.676441  | 0.491285 | 0.930618 | 0.315302  | 0.647743 | 0.615001 |
| TCNS_00155943     | XLOC_014178        | -            | lincRNA            | 1042 | chr2  | 207728120 | 207732313 | + | 2 | 3.99432 | 2.19099 | 2.66609 | 0.989466  | 1.17276  | 1.33892  | 2.44632   | 0.865077 | 0.894789 |
| TCNS_00154986     | XLOC_015165        | -            | lincRNA            | 2452 | chr2  | 213755834 | 213768856 | - | 2 | 3.58938 | 2.7769  | 2.99591 | 0.953609  | 3.79501  | 2.59501  | 2.30488   | 2.58868  | 2.29691  |
| TCNS_00157092     | XLOC_015165        | -            | lincRNA            | 1457 | chr2  | 213760746 | 213768539 | - | 2 | 2.98722 | 2.78849 | 2.01279 | 0.735843  | 2.7402   | 2.34626  | 2.0968    | 1.82594  | 2.64865  |
| TCNS_00157093     | XLOC_015165        | -            | lincRNA            | 4246 | chr2  | 213796686 | 213801506 | - | 2 | 3.76076 | 1.81449 | 3.67975 | 1.15424   | 2.97378  | 2.77956  | 1.72563   | 2.31982  | 2.46512  |
| TCNS_00175157     | XLOC_0015165       | -            | lincRNA            | 1881 | chr2  | 213829611 | 213838409 | - | 2 | 5.94909 | 2.60853 | 5.81194 | 1.37094   | 5.45199  | 3.22254  | 3.40627   | 4.30905  | 3.67862  |
| ENST00000415479.1 | ENSG00000230838.1  | AC093850.2   | lincRNA            | 648  | chr2  | 216582766 | 216584147 | + | 2 | 0.68095 | 2.54866 | 1.10636 | 1.72      | 1.94021  | 0.630831 | 1.59676   | 0.729793 | 0.870728 |
| TCNS_00153839     | XLOC_014219        | -            | lincRNA            | 843  | chr2  | 217695236 | 217696205 | + | 2 | 3.00915 | 0.99514 | 0.7662  | 0.199476  | 0.384737 | 0.877489 | 0.643576  | 0.378914 | 0.451585 |
| TCNS_00161255     | XLOC_014221        | -            | lincRNA            | 705  | chr2  | 218142332 | 218147478 | + | 2 | 1.20883 | 0.70558 | 1.11918 | 0.762569  | 0.7366   | 1.11852  | 0.823743  | 0.161468 | 0.230543 |
| TCNS_00165206     | XLOC_0015199       | -            | lincRNA            | 213  | chr2  | 220064032 | 220064650 | - | 2 | 0       | 0       | 3.06933 | 2.48787   | 0        | 0        | 0         | 0        | 0        |
| ENST00000442416.1 | ENSG00000227308.2  | AC009502.4   | lincRNA            | 361  | chr2  | 220594832 | 220602464 | + | 2 | 0       | 2.26082 | 0       | 1.20414   | 1.18176  | 1.7714   | 2.32829   | 2.10435  | 0.369685 |
| TCNS_00170517     | XLOC_014265        | -            | lincRNA            | 351  | chr2  | 220886475 | 220934017 | + | 3 | 2.66476 | 3.37981 | 2.9184  | 1.28422   | 0.420728 | 4.72432  | 4.15468   | 1.12528  | 2.76373  |
| TCNS_00153899     | XLOC_014266        | -            | lincRNA            | 1003 | chr2  | 221494981 | 221499203 | + | 3 | 1.90355 | 1.59101 | 1.22369 | 0.0798181 | 0.691947 | 1.05312  | 0.953434  | 0.705899 | 0.433176 |
| TCNS_00157941     | XLOC_014266        | -            | lincRNA            | 456  | chr2  | 221605020 | 221605559 | + | 2 | 2.37469 | 2.25036 | 1.12292 | 0.503226  | 0.734533 | 0.277175 | 2.85236   | 1.62177  | 0        |
| TCNS_00156025     | XLOC_014274        | -            | lincRNA            | 2898 | chr2  | 224045812 | 224273133 | + | 2 | 3.47537 | 2.43447 | 1.67508 | 3.77094   | 2.06092  | 2.8758   | 1.39462   | 1.11019  | 2.8374   |
| TCNS_00166142     | XLOC_014274        | -            | lincRNA            | 7261 | chr2  | 224046887 | 224073791 | + | 2 | 3.71246 | 4.66722 | 2.00342 | 6.78428   | 2.59105  | 7.04114  | 1.20327   | 2.5572   | 3.56763  |
| TCNS_00171830     | XLOC_014274        | -            | lincRNA            | 1900 | chr2  | 224047053 | 224278638 | + | 3 | 1.80769 | 3.92814 | 1.32741 | 3.46281   | 1.82909  | 5.00766  | 1.06051   | 2.39158  | 3.26625  |
| TCNS_00159579     | XLOC_014274        | -            | lincRNA            | 4485 | chr2  | 224047053 | 224187757 | + | 2 | 1.42113 | 2.09816 | 0.81364 | 3.16684   | 1.50466  | 4.58608  | 1.20608   | 1.16664  | 1.94763  |
| TCNS_00167708     | XLOC_014274        | -            | lincRNA            | 1201 | chr2  | 224244354 | 224325893 | + | 4 | 0.36278 | 0.2233  | 0.72651 | 1.06006   | 0.96026  | 1.06516  | 0.500761  | 0.407134 | 0.879527 |
| TCNS_00153907     | XLOC_014274        | -            | lincRNA            | 4054 | chr2  | 224319922 | 224325391 | + | 2 | 1.08843 | 1.35103 | 0.54809 | 1.24901   | 0.593158 | 2.63744  | 0.478085  | 0.855645 | 1.62757  |
| TCNS_00171831     | XLOC_014274        | -            | lincRNA            | 4555 | chr2  | 224319924 | 224327550 | + | 3 | 0.80576 | 1.41152 | 0.48329 | 0.69323   | 0.5521   | 1.73091  | 0.277818  | 0.531419 | 0.979519 |
| TCNS_00159580     | XLOC_014278        | -            | anti-sense_lincRNA | 5358 | chr2  | 225837829 | 226167342 | + | 2 | 1.38606 | 1.81967 | 0.60668 | 0.607676  | 0.356933 | 0.354253 | 0.450911  | 1.22807  | 1.03918  |
| TCNS_00162024     | XLOC_015225        | -            | intronic_lincRNA   | 4380 | chr2  | 225874364 | 225878807 | - | 2 | 2.32097 | 2.22909 | 3.69468 | 2.49463   | 2.01188  | 2.11869  | 1.61448   | 2.80181  | 4.88231  |
| TCNS_00173159     | XLOC_014288        | -            | lincRNA            | 1849 | chr2  | 228794434 | 228798848 | + | 2 | 4.20794 | 1.58701 | 1.6083  | 0.310573  | 0.410333 | 0.725298 | 1.84274   | 1.07388  | 2.06688  |
| TCNS_00155060     | XLOC_015232        | -            | lincRNA            | 1058 | chr2  | 229353366 | 229706954 | - | 3 | 4.51397 | 1.40568 | 2.53411 | 0.522832  | 0.503453 | 0.57482  | 2.2629    | 0.660153 | 0.405228 |
| TCNS_00164657     | XLOC_014290        | -            | lincRNA            | 3681 | chr2  | 230989387 | 231007585 | + | 2 | 0.58668 | 0.6085  | 0.35988 | 1.36007   | 1.14653  | 0.767374 | 0.41806   | 0.53025  | 0.596365 |
| ENST00000418025.1 | ENSG00000228162.1  | AC097713.3   | lincRNA            | 562  | chr2  | 235346972 | 235370771 | + | 3 | 0.84177 | 1.18625 | 1.17918 | 2.13075   | 9.2898   | 1.95445  | 1.49182   | 3.85784  | 0        |
| TCNS_00157196     | XLOC_015256        | -            | lincRNA            | 767  | chr2  | 235742519 | 235743378 | - | 2 | 1.97477 | 0.12554 | 0.6218  | 0         | 0.764448 | 0.622281 | 0.10453   | 0.143517 | 0.102542 |
| TCNS_00168321     | XLOC_015269        | -            | lincRNA            | 576  | chr2  | 240851548 | 240852489 | - | 2 | 0.54041 | 0.19024 | 0.37808 | 0.170918  | 1.32424  | 0.940587 | 0         | 0        | 0.310821 |
| TCNS_00155106     | XLOC_015272        | -            | intronic_lincRNA   | 864  | chr2  | 241388823 | 241390375 | - | 2 | 1.99398 | 0.85636 | 0.74164 | 0.86917   | 3.25906  | 1.80546  | 0.889779  | 0.73352  | 1.22411  |
| ENST00000433036.1 | ENSG00000228989.1  | AC133528.2   | lincRNA            | 415  | chr2  | 242629829 | 242633704 | + | 2 | 4.7044  | 11.0954 | 5.71909 | 4.19965   | 4.09816  | 2.64495  | 4.28341   | 5.05487  | 3.29719  |
| TCNS_00170581     | XLOC_014370        | -            | lincRNA            | 3002 | chr2  | 242823535 | 242910908 | + | 3 | 1.00015 | 0.81429 | 0.74969 | 1.14515   | 1.2382   | 1.60416  | 0.768959  | 1.31512  | 1.78849  |
| TCNS_00159685     | XLOC_014370        | -            | lincRNA            | 1365 | chr2  | 242824145 | 242909230 | + | 3 | 1.27388 | 0.71113 | 1.9114  | 0.651668  | 0.344648 | 0.60848  | 0.0008521 | 1.11588  | 0.80092  |
| TCNS_00159686     | XLOC_014371        | -            | lincRNA            | 836  | chr2  | 242913041 | 242914067 | + | 2 | 0.80057 | 2.68317 | 1.43882 | 0.605033  | 0.972524 | 0.66539  | 0.836737  | 1.6603   | 1.3698   |
| TCNS_00180143     | XLOC_015676        | -            | lincRNA            | 309  | chr20 | 998222    | 999651    | - | 2 | 1.82579 | 0       | 0.68243 | 0.591809  | 0        | 0        | 0         | 0        | 0        |
| TCNS_00180982     | XLOC_015308        | -            | lincRNA            | 425  | chr20 | 1166736   | 1171411   | + | 2 | 0       | 1.92568 | 0       | 0.859637  | 0        | 0        | 0         | 0        | 0        |
| TCNS_00183673     | XLOC_015681        | -            | lincRNA            | 245  | chr20 | 1394922   | 1399592   | - | 3 | 0       | 1.48641 | 0       | 0         | 1.31175  | 0        | 1.3584    | 1.80063  | 0        |
| TCNS_00182128     | XLOC_015688        | -            | lincRNA            | 575  | chr20 | 1753090   | 1753774   | - | 2 | 0.27092 | 0.95377 | 0.18955 | 2.39927   | 0.995871 | 1.32036  | 0.319645  | 0.218866 | 0.467493 |
| TCNS_00182914     | XLOC_015690        | -            | lincRNA            | 3636 | chr20 | 1844760   | 1848859   | - | 2 | 1.04013 | 0.63703 | 0.16205 | 1.76891   | 1.51898  | 1.24798  | 0.254133  | 0.443785 | 0.285311 |
| TCNS_00180149     | XLOC_015689        | -            | anti-sense_lincRNA | 6626 | chr20 | 1865514   | 1874889   | - | 2 | 2.14583 | 2.55828 | 1.04933 | 1.70208   | 1.69954  | 1.83716  | 0.615007  | 1.27229  | 0.923619 |
| TCNS_00180182     | XLOC_015712        | -            | lincRNA            | 1504 | chr20 | 4448454   | 4450957   | - | 2 | 2.58148 | 1.52006 | 1.01835 | 0.294645  | 0.330508 | 0.4318   | 0.179602  | 0.3091   | 0.221699 |
| TCNS_00185504     | XLOC_015345        | -            | lincRNA            | 833  | chr20 | 6150557   | 6151721   | + | 2 | 0       | 0.22467 | 0.22242 | 0.101318  | 0.293152 | 0.111426 | 0.28026   | 1.15497  | 0.367026 |
| TCNS_00182738     | XLOC_015354        | -            | lincRNA            | 330  | chr20 | 10194340  | 10195939  | + | 2 | 0       | 0.56248 | 0       | 0.99443   | 0        | 0        | 0         | 0        | 0.92033  |
| TCNS_00181963     | XLOC_015358        | -            | lincRNA            | 224  | chr20 | 10845382  | 10889495  | + | 3 | 0       | 0       | 14.128  | 0         | 3.94905  | 0        | 2.07547   | 0        | 0        |
| TCNS_00185512     | XLOC_015360        | -            | lincRNA            | 418  | chr20 | 10919560  | 10920894  | + | 2 | 0       | 0.33149 | 0.33161 | 0         | 0        | 0.652042 | 0.562836  | 1.53306  | 0        |
| TCNS_00179852     | XLOC_015401        | -            | lincRNA            | 2227 | chr20 | 24911288  | 24914086  | + | 2 | 12.4877 | 12.0308 | 15.7881 | 4.70473   | 13.071   | 9.26441  | 14.5962   | 13.0508  | 10.1393  |
| ENST00000376445.3 | ENSG00000226465.1  | RP13-401N8.1 | lincRNA            | 320  | chr20 | 25731854  | 25733397  | + | 2 | 0.83271 | 2.43989 | 0       | 0.538341  | 0        | 1.18958  | 0         | 0        | 0.998365 |
| TCNS_00183732     | XLOC_015783        | -            | anti-sense_lincRNA | 1376 | chr20 | 30921433  | 30937936  | - | 2 | 9.10619 | 8.97338 | 10.1702 | 7.95132   | 9.84733  | 9.21887  | 8.82136   | 10.359   | 12.1496  |
| TCNS_00183144     | XLOC_015454        | -            | lincRNA            | 851  | chr20 | 32774306  | 32779486  | + | 2 | 0.46931 | 0.4368  | 0.86475 | 2.36421   | 1.42488  | 3.35832  | 1.36182   | 0.87311  | 0.445988 |
| ENST00000424358.1 | ENSG00000126005.11 | MMP24-AS1    | anti-sense_lincRNA | 867  | chr20 | 33864953  | 33865932  | - | 2 | 5.49704 | 4.04928 | 4.64051 | 2.11506   | 6.76664  | 5.18048  | 6.46563   | 5.4763   | 4.17792  |
| TCNS_00182201     | XLOC_015807        | -            | anti-sense_lincRNA | 3090 | chr20 | 34061632  | 34066042  | - | 2 | 1.20117 | 1.4419  | 2.0239  | 0.686349  | 1.44522  | 1.55695  | 0.947351  | 1.77819  | 1.71655  |
| TCNS_00182207     | XLOC_015815        | -            | lincRNA            | 564  | chr20 | 35199819  | 35201750  | - | 2 | 0.27906 | 1.17963 | 1.75881 | 0.529746  | 0.855366 | 0.388727 | 0.329632  | 1.12826  | 0.481837 |
| TCNS_00182806     | XLOC_015500        | -            | anti-sense_lincRNA | 299  | chr20 | 36888683  | 36917340  | + | 2 | 0       | 0.73914 | 0       | 3.89958   | 0.645701 | 1.43773  | 5.19134   | 4.35883  | 2.42209  |
| TCNS_00180334     | XLOC_015830        | -            | lincRNA            | 253  | chr20 | 38414368  | 38416871  | - | 3 | 1.719   | 0       | 0       | 2.27843   | 0        | 0        | 0         | 0        | 1.5742   |
| TCNS_00185138     | XLOC_015833        | -            | lincRNA            | 425  | chr20 | 39092885  | 39095574  | - | 2 | 0       | 0       | 1.6045  | 0         | 0.558809 | 0        | 1.361     | 0.370864 | 0.262267 |
| TCNS_00181390     | XLOC_015836        | -            | lincRNA            | 744  | chr20 | 39225864  | 39234128  | - | 2 | 0.74834 | 0.91628 | 0.77822 | 0         | 1.02485  | 0.259487 | 0.327     |          |          |



|                   |                   |                |                    |      |       |           |          |   |    |         |         |         |          |           |           |          |          |          |
|-------------------|-------------------|----------------|--------------------|------|-------|-----------|----------|---|----|---------|---------|---------|----------|-----------|-----------|----------|----------|----------|
| TCONS_00183001    | XLOC_015880       | -              | lincRNA            | 253  | chr20 | 45114260  | 45117436 | - | 2  | 3.438   | 1.30662 | 0       | 2.27843  | 0         | 0         | 2.36981  | 3.1484   | 1.0769   |
| TCONS_00180024    | XLOC_015560       | -              | lincRNA            | 235  | chr20 | 46648350  | 46649099 | + | 2  | 2.30501 | 0       | 0       | 1.54567  | 0         | 1.71905   | 0        | 0        | 0        |
| TCONS_00181190    | XLOC_015571       | -              | lincRNA            | 374  | chr20 | 487896129 | 48789636 | + | 2  | 2.89828 | 0.41759 | 1.25826 | 0.371225 | 0.36372   | 0.409451  | 2.14372  | 0        | 0        |
| TCONS_00182274    | XLOC_015912       | -              | lincRNA            | 1924 | chr20 | 51364247  | 51406264 | - | 4  | 0.71031 | 0.2051  | 1.45703 | 0.111393 | 0.392424  | 0.0816114 | 0.271079 | 0.140033 | 0.134012 |
| TCONS_00183023    | XLOC_015913       | -              | lincRNA            | 2053 | chr20 | 51457000  | 51460553 | - | 2  | 0.88123 | 0.80128 | 0.63992 | 1.20902  | 0.862776  | 0.493493  | 0.756251 | 1.21553  | 0.124654 |
| TCONS_00183024    | XLOC_015913       | -              | lincRNA            | 905  | chr20 | 51461061  | 51512001 | - | 2  | 1.58939 | 0.50386 | 0.79768 | 2.09169  | 0.876569  | 0.600026  | 0.75342  | 1.15048  | 0.576179 |
| TCONS_00182087    | XLOC_015586       | -              | lincRNA            | 733  | chr20 | 52355374  | 52357651 | + | 2  | 0.95465 | 0.80176 | 0.5297  | 0.481578 | 0.464992  | 0.264868  | 1.00217  | 0.764175 | 0.327457 |
| TCONS_00182863    | XLOC_015598       | -              | lincRNA            | 1289 | chr20 | 55549320  | 55552932 | + | 3  | 0.74912 | 0.45542 | 0.38559 | 0.764654 | 0.113172  | 0.38794   | 0.37705  | 1.63087  | 0.37197  |
| TCONS_00182282    | XLOC_015921       | -              | lincRNA            | 279  | chr20 | 56064055  | 56070322 | - | 2  | 0       | 0       | 3.76963 | 4.02391  | 0.804441  | 0         | 1.63236  | 2.18345  | 0        |
| TCONS_00184559    | XLOC_015928       | -              | lincRNA            | 1197 | chr20 | 56821088  | 56884504 | - | 10 | 2.55657 | 3.19932 | 3.30164 | 4.36951  | 2.34982   | 3.24937   | 2.5914   | 2.59313  | 3.13575  |
| TCONS_00180457    | XLOC_015929       | -              | intronic_lincRNA   | 2466 | chr20 | 57457593  | 57461875 | - | 2  | 1.93701 | 1.12266 | 1.94409 | 0.593087 | 1.68147   | 0.508219  | 1.23536  | 1.59855  | 0.891442 |
| TCONS_00180953    | XLOC_015929       | -              | intronic_lincRNA   | 755  | chr20 | 57457709  | 57463853 | - | 3  | 0       | 0       | 0.08665 | 0        | 0         | 0.137583  | 0        | 0        | 0        |
| TCONS_00180458    | XLOC_015929       | -              | intronic_lincRNA   | 1169 | chr20 | 57459112  | 57463853 | - | 2  | 1.78857 | 0.5853  | 1.52586 | 0.528943 | 1.27269   | 0.766246  | 1.09114  | 1.4117   | 0.896355 |
| TCONS_00180095    | XLOC_015624       | -              | lincRNA            | 1504 | chr20 | 58754901  | 58896571 | + | 4  | 3.5202  | 2.38866 | 1.39353 | 0.540183 | 0.283292  | 0.539749  | 0.583706 | 0.43274  | 0.620757 |
| TCONS_00182697    | XLOC_015938       | -              | anti-sense_lincRNA | 254  | chr20 | 60883424  | 60884086 | - | 2  | 8.47019 | 1.28672 | 5.34527 | 5.61018  | 4.52969   | 3.73658   | 2.33158  | 7.74619  | 1.06026  |
| TCONS_00183046    | XLOC_015944       | -              | intronic_lincRNA   | 5619 | chr20 | 61277779  | 61283680 | - | 2  | 0.59754 | 0.26606 | 0.66418 | 0.903678 | 0.324018  | 0.283564  | 0.217709 | 0.510459 | 0.582936 |
| TCONS_00181475    | XLOC_015944       | -              | intronic_lincRNA   | 3660 | chr20 | 61279599  | 61283559 | - | 2  | 0.3924  | 1.48089 | 1.33236 | 1.432    | 1.2491    | 1.12015   | 1.30737  | 2.19186  | 2.61976  |
| TCONS_00182885    | XLOC_015651       | -              | lincRNA            | 391  | chr20 | 62259474  | 62261030 | + | 2  | 0.52879 | 0       | 0.38054 | 1.35186  | 0.661032  | 0.745277  | 0.323632 | 0        | 0        |
| TCONS_00183666    | XLOC_015661       | -              | intronic_lincRNA   | 241  | chr20 | 62690023  | 62690988 | + | 2  | 2.07616 | 0       | 1.66788 | 1.38626  | 2.8145    | 0         | 0        | 0        | 1.31663  |
| TCONS_00188453    | XLOC_015974       | -              | lincRNA            | 378  | chr21 | 9711969   | 9746428  | + | 2  | 1.13366 | 0.81596 | 0       | 0        | 1.06598   | 0.400155  | 0.348763 | 0        | 0        |
| TCONS_00189590    | XLOC_016136       | -              | lincRNA            | 776  | chr21 | 15280021  | 15282494 | - | 3  | 0.70692 | 0.74133 | 0.12239 | 0.222755 | 0.967352  | 0.490011  | 0.308587 | 1.97733  | 0.706473 |
| ENST00000428809.1 | ENSG00000224905.2 | AP001347.6     | anti-sense_lincRNA | 1332 | chr21 | 15399742  | 15516789 | + | 3  | 1.62162 | 0.62576 | 0.92707 | 0.39607  | 1.9049    | 1.43048   | 1.55389  | 2.21002  | 0.919981 |
| TCONS_00189438    | XLOC_016143       | -              | lincRNA            | 1658 | chr21 | 16133206  | 16135588 | - | 2  | 2.02931 | 3.36977 | 6.22601 | 3.03919  | 2.67036   | 3.84848   | 4.9324   | 7.91696  | 6.315    |
| ENST00000435315.2 | ENSG00000226751.2 | AF127936.5     | lincRNA            | 695  | chr21 | 16134031  | 16135411 | - | 2  | 0       | 1.37752 | 0.00363 | 2.95549  | 1.21949   | 2.1771    | 0.333985 | 3.74117  | 1.13926  |
| ENST00000413645.1 | ENSG00000228798.1 | AP000473.5     | lincRNA            | 550  | chr21 | 18003146  | 18012952 | + | 2  | 2.61137 | 2.04593 | 3.25503 | 0.183683 | 1.06817   | 1.01098   | 0.858206 | 0.939691 | 0.334279 |
| TCONS_00188462    | XLOC_015998       | -              | lincRNA            | 1224 | chr21 | 25800779  | 25811350 | + | 2  | 0.697   | 0.48448 | 1.09407 | 0.3128   | 0.361186  | 0.275085  | 0.401269 | 1.02543  | 1.18713  |
| TCONS_00187639    | XLOC_016000       | -              | lincRNA            | 8047 | chr21 | 26934153  | 26942309 | + | 2  | 1.02837 | 1.04284 | 5.30514 | 3.17065  | 0.938125  | 1.82672   | 1.28828  | 2.65509  | 3.25259  |
| TCONS_00188840    | XLOC_016003       | -              | lincRNA            | 323  | chr21 | 28417830  | 28447247 | + | 2  | 4.06572 | 2.97471 | 7.22815 | 0        | 0         | 1.16068   | 0.516703 | 0.697091 | 0.973658 |
| TCONS_00188348    | XLOC_016166       | -              | lincRNA            | 908  | chr21 | 29541986  | 29598351 | - | 4  | 0.50972 | 0.00014 | 0.09928 | 1.18176  | 0.503832  | 1.96371   | 0.454207 | 1.10166  | 1.10255  |
| TCONS_00188916    | XLOC_016166       | -              | lincRNA            | 3493 | chr21 | 29581613  | 29598467 | - | 3  | 1.34752 | 0.10719 | 0.5073  | 1.30079  | 1.85037   | 1.62841   | 1.08825  | 1.30117  | 0.762653 |
| TCONS_00187935    | XLOC_016166       | -              | lincRNA            | 9118 | chr21 | 29810755  | 29901568 | - | 3  | 5.20031 | 1.85878 | 2.36097 | 2.53161  | 2.99892   | 4.877     | 2.72265  | 4.49211  | 4.03096  |
| TCONS_00187220    | XLOC_016039       | -              | lincRNA            | 512  | chr21 | 35665740  | 35697230 | + | 2  | 0.6505  | 0.68983 | 0.22892 | 0        | 0.200107  | 0.45405   | 2.32047  | 0.793206 | 0.563579 |
| TCONS_00189165    | XLOC_016194       | -              | intronic_lincRNA   | 1849 | chr21 | 35855026  | 35859394 | - | 2  | 4.14606 | 1.07231 | 1.90457 | 1.16465  | 1.60404   | 1.91992   | 0.779623 | 0.927447 | 1.75166  |
| TCONS_00187975    | XLOC_016196       | -              | lincRNA            | 614  | chr21 | 37315475  | 37354225 | - | 2  | 2.45529 | 7.76461 | 2.741   | 4.80991  | 2.40202   | 1.02445   | 0.865909 | 0.791104 | 0.704763 |
| ENST00000457157.2 | ENSG00000231106.2 | AP000688.8     | lincRNA            | 1048 | chr21 | 37377636  | 37380136 | + | 2  | 14.1819 | 49.2808 | 19.3564 | 3.9298   | 2.54715   | 2.1603    | 8.88231  | 10.4021  | 4.78378  |
| TCONS_00189898    | XLOC_016198       | -              | lincRNA            | 584  | chr21 | 37503222  | 37505273 | - | 2  | 0.79382 | 0.74488 | 1.11005 | 0.66936  | 0.972182  | 1.84172   | 0.467869 | 1.70888  | 2.43401  |
| TCONS_00189252    | XLOC_016063       | -              | lincRNA            | 801  | chr21 | 40229451  | 40230347 | + | 2  | 1.35524 | 1.06532 | 0.23444 | 0.10673  | 0.10297   | 0         | 2.56089  | 0.405811 | 0.580125 |
| TCONS_00188164    | XLOC_016211       | -              | lincRNA            | 345  | chr21 | 40395852  | 40400664 | - | 2  | 0       | 0       | 0.50745 | 1.78332  | 0         | 0         | 0.8676   | 1.17408  | 0        |
| TCONS_00187356    | XLOC_016229       | -              | lincRNA            | 607  | chr21 | 43131841  | 43133218 | - | 2  | 1.99784 | 2.10666 | 2.26621 | 0.473519 | 0.458234  | 0.521091  | 0.734378 | 1.201257 | 0.573641 |
| TCONS_00187673    | XLOC_016076       | -              | lincRNA            | 900  | chr21 | 43442115  | 43445077 | + | 2  | 6.54836 | 2.13144 | 6.12629 | 0.366378 | 0.353153  | 1.4101    | 1.51779  | 0.463525 | 0.580328 |
| TCONS_00186871    | XLOC_016235       | -              | anti-sense_lincRNA | 491  | chr21 | 43501668  | 43505139 | - | 2  | 2.78835 | 0.98738 | 1.22974 | 0        | 0.214829  | 0.243557  | 0.415832 | 0.5682   | 0.201675 |
| TCONS_00188017    | XLOC_016242       | -              | anti-sense_lincRNA | 5674 | chr21 | 43990408  | 44001592 | - | 4  | 1.09903 | 0.66965 | 0.75871 | 0.262629 | 0.564331  | 0.244952  | 1.58209  | 0.563489 | 0.937278 |
| TCONS_00186883    | XLOC_016242       | -              | anti-sense_lincRNA | 8903 | chr21 | 43991142  | 44000161 | - | 2  | 2.38381 | 1.48369 | 1.84661 | 0.371304 | 0.455737  | 0.394958  | 1.33517  | 0.548028 | 0.860379 |
| ENST00000419628.1 | ENSG00000225431.1 | AP001626.1     | lincRNA            | 1775 | chr21 | 44019390  | 44035168 | - | 2  | 2.07312 | 1.70675 | 1.37403 | 0.569069 | 0.546868  | 0.670087  | 1.55884  | 0.511198 | 0.623621 |
| TCONS_00187491    | XLOC_016083       | -              | lincRNA            | 440  | chr21 | 44299742  | 44304065 | + | 2  | 0       | 1.98799 | 0       | 0.537019 | 0         | 0.735737  | 1.38633  | 0.96338  | 1.51177  |
| TCONS_00187682    | XLOC_016083       | -              | lincRNA            | 533  | chr21 | 44299754  | 44304136 | + | 2  | 0       | 0.18713 | 2.00537 | 0.289916 | 0.937113  | 0         | 2.82255  | 0.646372 | 0.441821 |
| TCONS_00186702    | XLOC_016083       | -              | lincRNA            | 643  | chr21 | 44299754  | 44304136 | + | 2  | 2.43896 | 0.26298 | 1.16823 | 0.386226 | 0.433443  | 0.74687   | 1.34686  | 0.919734 | 0.612757 |
| TCONS_00187031    | XLOC_016085       | -              | lincRNA            | 3427 | chr21 | 44337869  | 44341347 | + | 2  | 2.21491 | 1.20354 | 1.59626 | 0.634458 | 1.5985    | 1.76457   | 0.848047 | 0.870599 | 1.51911  |
| TCONS_00187252    | XLOC_016087       | -              | lincRNA            | 1402 | chr21 | 44527844  | 44530491 | + | 2  | 0.76368 | 0.53024 | 1.86172 | 0.372969 | 0.922338  | 0.819911  | 0.682489 | 0.87239  | 0.625558 |
| TCONS_00188584    | XLOC_016248       | -              | lincRNA            | 392  | chr21 | 44731449  | 44733926 | - | 2  | 0       | 0       | 0       | 0.336193 | 0.986246  | 0.370677  | 0.643692 | 1.7502   | 0.30856  |
| ENST00000411694.1 | ENSG00000225331.1 | AP001055.6     | lincRNA            | 863  | chr21 | 45578623  | 45579955 | - | 2  | 0.30723 | 0.85767 | 0.74278 | 3.19178  | 1.11909   | 1.59547   | 1.15849  | 1.10196  | 1.75139  |
| TCONS_00187700    | XLOC_016118       | -              | lincRNA            | 338  | chr21 | 47392853  | 47394107 | + | 2  | 0.72737 | 0       | 1.60305 | 0        | 1.84562   | 0         | 1.37178  | 0.618234 | 0        |
| ENST00000444039.1 | ENSG00000237476.1 | XXbac-B135H6.1 | lincRNA            | 684  | chr22 | 21311380  | 21318967 | + | 2  | 0.21018 | 1.32578 | 1.16863 | 0.928415 | 1.92235   | 0.291828  | 1.59788  | 0.843057 | 1.08298  |
| TCONS_00192180    | XLOC_016641       | -              | lincRNA            | 1912 | chr22 | 22442093  | 22452984 | - | 2  | 0.41725 | 0.57832 | 0.12228 | 1.72001  | 0.0359258 | 0.821844  | 0.204744 | 1.17517  | 3.6775   |
| TCONS_00191467    | XLOC_016642       | -              | lincRNA            | 718  | chr22 | 22649093  | 22652390 | - | 3  | 1.76793 | 1.51291 | 0.68163 | 1.36283  | 1.31617   | 0.681442  | 0.573269 | 0.786708 | 1.12347  |
| TCONS_00190558    | XLOC_016650       | -              | lincRNA            | 481  | chr22 | 23994588  | 23995352 | - | 2  | 1.80425 | 3.58116 | 1.27487 | 0.458168 | 0.445256  | 1.51378   | 1.07818  | 1.47273  | 1.67194  |
| TCONS_00190225    | XLOC_016374       | -              | lincRNA            | 219  | chr22 | 24643924  | 24644876 | + | 2  | 3.17176 | 2.47621 | 0       | 0        | 2.21283   | 0         | 0        | 0        | 0        |
| TCONS_00191054    | XLOC_016685       | -              | intronic_lincRNA   | 566  | chr22 | 29049511  | 29052415 | - | 2  | 2.22034 | 1.75964 | 1.16598 | 0        | 1.02074   | 0.966469  | 0.163885 | 1.57071  | 0.638885 |
| TCONS_00191865    | XLOC_016689       | -              | lincRNA            | 621  | chr22 | 29582144  | 29601808 | - | 3  | 1.69027 | 2.71425 | 0.84202 | 0.915403 | 1.03317   | 0.503655  | 1.84403  | 1.55531  | 2.07867  |
| TCONS_00190281    | XLOC_016424       | -              | lincRNA            | 2183 | chr22 | 30870870  | 30876341 | + | 2  | 3.3444  | 3.80685 | 1.95805 | 0.410325 | 1.14703   | 1.95079   | 3.11634  | 0.810735 | 1        |

|                   |                   |              |                    |       |       |          |          |   |   |         |         |          |           |           |           |          |          |          |
|-------------------|-------------------|--------------|--------------------|-------|-------|----------|----------|---|---|---------|---------|----------|-----------|-----------|-----------|----------|----------|----------|
| TCONS_00191709    | XLOC_016424       | -            | lincRNA            | 1742  | chr22 | 30871270 | 30883227 | + | 4 | 3.0438  | 2.70686 | 3.30525  | 0.498225  | 0.877823  | 1.46017   | 2.23703  | 1.04441  | 0.936787 |
| ENST00000442126.1 | ENSG00000181123.4 | RP4-539M6.14 | anti-sense_lincRNA | 502   | chr22 | 30887789 | 30888791 | + | 2 | 2.35159 | 2.85235 | 2.13056  | 0.639174  | 0.413719  | 0.703824  | 0.800149 | 0.820289 | 0.776777 |
| TCONS_00190643    | XLOC_016725       | -            | anti-sense_lincRNA | 563   | chr22 | 32748643 | 32751037 | - | 2 | 2.51842 | 0.39431 | 0.7839   | 0.885355  | 1.37242   | 0.584711  | 0.495857 | 1.81032  | 0.483188 |
| TCONS_00190673    | XLOC_016757       | -            | lincRNA            | 3875  | chr22 | 37584975 | 37594714 | - | 2 | 2.63972 | 1.26792 | 2.36689  | 1.06192   | 1.55369   | 1.81709   | 1.26694  | 2.4236   | 1.99262  |
| TCONS_00190362    | XLOC_016476       | -            | intronic_lincRNA   | 539   | chr22 | 38483272 | 38484377 | + | 2 | 1.79705 | 1.47936 | 0.42043  | 0.758706  | 0.183902  | 0.208806  | 0.177413 | 0.242758 | 0.345304 |
| ENST00000412067.1 | ENSG00000228274.3 | RP3-508I15.9 | lincRNA            | 738   | chr22 | 39071819 | 39077792 | - | 2 | 2.45912 | 1.45609 | 0.91822  | 0.477087  | 1.03641   | 0.524789  | 0.772058 | 1.05973  | 0.432509 |
| TCONS_00193041    | XLOC_016482       | -            | lincRNA            | 1733  | chr22 | 39348725 | 39350567 | + | 2 | 0.4659  | 0.55379 | 0.09109  | 1.08583   | 0.361226  | 1.05666   | 0.305121 | 0.577818 | 1.65846  |
| TCONS_00192255    | XLOC_016794       | -            | lincRNA            | 391   | chr22 | 41591340 | 41593482 | - | 2 | 2.64393 | 2.27729 | 1.52215  | 0.337966  | 0.330516  | 1.11792   | 1.61816  | 1.75978  | 0.310218 |
| TCONS_00193994    | XLOC_016848       | -            | lincRNA            | 363   | chr22 | 45852959 | 45853568 | - | 2 | 1.85425 | 0       | 0        | 0         | 0         | 1.74946   | 0        | 1.03865  | 0        |
| TCONS_00193890    | XLOC_016563       | -            | lincRNA            | 3366  | chr22 | 47620388 | 47624926 | + | 2 | 1.03203 | 0.28996 | 0.48373  | 0.242509  | 0.659501  | 0.466303  | 0.312673 | 0.659228 | 1.25696  |
| TCONS_00192279    | XLOC_016861       | -            | lincRNA            | 9027  | chr22 | 47855847 | 47866361 | - | 2 | 1.7243  | 0.86306 | 1.68469  | 0.760795  | 2.20985   | 1.31341   | 0.42775  | 0.898616 | 0.789709 |
| TCONS_00194858    | XLOC_016564       | -            | lincRNA            | 306   | chr22 | 47985213 | 47987715 | + | 2 | 0.93739 | 0       | 0        | 0         | 0.603117  | 0         | 0        | 1.62596  | 1.697    |
| TCONS_00191411    | XLOC_016584       | -            | lincRNA            | 1673  | chr22 | 51023725 | 51025917 | + | 3 | 1.31603 | 0.76858 | 1.46974  | 0.608526  | 1.46221   | 0.812113  | 0.913249 | 0.76555  | 0.823901 |
| TCONS_00190483    | XLOC_016587       | -            | lincRNA            | 251   | chr22 | 51111230 | 51112702 | + | 2 | 5.31266 | 1.34801 | 1.40252  | 1.17496   | 1.18737   | 3.914     | 3.67418  | 0        | 1.11154  |
| TCONS_00207661    | XLOC_017661       | -            | lincRNA            | 224   | chr3  | 3164133  | 3168277  | - | 2 | 0       | 0       | 0        | 0         | 1.97453   | 0         | 0        | 2.7336   | 0        |
| TCONS_00196498    | XLOC_017666       | -            | lincRNA            | 2665  | chr3  | 3817103  | 3824384  | - | 3 | 1.837   | 1.38079 | 0.74625  | 0.56122   | 0.697927  | 0.771433  | 0.761984 | 0.782226 | 1.07275  |
| TCONS_00203815    | XLOC_017666       | -            | lincRNA            | 564   | chr3  | 3819290  | 3822983  | - | 3 | 3.8073  | 4.09433 | 3.24327  | 1.30349   | 1.71073   | 1.54656   | 2.76546  | 0        | 2.59766  |
| TCONS_00201149    | XLOC_017666       | -            | lincRNA            | 534   | chr3  | 3968544  | 4003654  | - | 2 | 1.51981 | 2.78919 | 0.64034  | 1.34772   | 0.933511  | 1.05978   | 0.900835 | 0        | 1.40224  |
| ENST00000439325.1 | ENSG00000233912.1 | AC026202.3   | anti-sense_lincRNA | 672   | chr3  | 5198590  | 5229014  | - | 4 | 1.50846 | 1.81317 | 1.64849  | 4.35252   | 1.18309   | 2.39431   | 1.51345  | 6.40043  | 5.30734  |
| TCONS_00211609    | XLOC_016909       | -            | lincRNA            | 651   | chr3  | 8723562  | 8725209  | + | 2 | 2.25481 | 5.22121 | 2.82563  | 0.569504  | 1.23888   | 0.156653  | 2.90739  | 0.906045 | 1.93868  |
| TCONS_00207675    | XLOC_017696       | -            | intronic_lincRNA   | 673   | chr3  | 11291935 | 11296513 | - | 2 | 0       | 0.45232 | 0.95527  | 0.407182  | 1.4429    | 0         | 2.8036   | 0        | 2.80584  |
| TCONS_00211982    | XLOC_017696       | -            | intronic_lincRNA   | 753   | chr3  | 11292017 | 11296547 | - | 3 | 0.55216 | 0       | 0.46073  | 0         | 0         | 0.255244  | 2.11492  | 0.883274 | 0.86428  |
| TCONS_00196527    | XLOC_017701       | -            | anti-sense_lincRNA | 423   | chr3  | 12196393 | 12196870 | - | 2 | 4.08369 | 0       | 0.64778  | 0         | 0         | 0.318635  | 0.549545 | 0.374325 | 0        |
| TCONS_00211988    | XLOC_017705       | -            | lincRNA            | 318   | chr3  | 12815649 | 12818121 | - | 2 | 0       | 0       | 0        | 0         | 0         | 0.604814  | 0.539895 | 0        | 1.01551  |
| TCONS_00214024    | XLOC_017707       | -            | intronic_lincRNA   | 2648  | chr3  | 13039668 | 13059241 | - | 2 | 0.95914 | 1.24104 | 1.423    | 1.77758   | 0.928681  | 2.01072   | 1.04781  | 2.10048  | 2.23933  |
| TCONS_00207680    | XLOC_017712       | -            | lincRNA            | 4806  | chr3  | 14078690 | 14088679 | - | 2 | 0.77605 | 0.39841 | 0.30201  | 1.99993   | 3.54456   | 7.72102   | 0.340937 | 0.78354  | 0.362927 |
| TCONS_00203139    | XLOC_016950       | -            | anti-sense_lincRNA | 893   | chr3  | 14186112 | 14189501 | + | 3 | 1.12347 | 3.08652 | 2.64204  | 0.555133  | 1.15944   | 0.81394   | 2.12967  | 1.28774  | 0.960585 |
| ENST00000428681.3 | ENSG00000228242.3 | AC093495.4   | anti-sense_lincRNA | 947   | chr3  | 14186223 | 14189662 | + | 3 | 0.86696 | 0.37043 | 0.74847  | 0         | 0         | 0         | 0        | 0        | 0.739999 |
| TCONS_00196551    | XLOC_017715       | -            | lincRNA            | 1840  | chr3  | 14409876 | 14412022 | - | 2 | 3.23547 | 1.76826 | 1.4895   | 0.351314  | 1.50034   | 0.815083  | 0.855198 | 0.68715  | 0.634045 |
| TCONS_00196578    | XLOC_017736       | -            | intronic_lincRNA   | 7157  | chr3  | 17611591 | 17628550 | - | 2 | 5.21216 | 3.30597 | 5.68494  | 3.04314   | 4.61215   | 4.48462   | 3.31603  | 3.92833  | 3.8181   |
| TCONS_00199257    | XLOC_016971       | -            | lincRNA            | 2715  | chr3  | 18506367 | 18572715 | + | 4 | 0.89302 | 1.06745 | 1.82815  | 1.2722    | 1.61233   | 2.01301   | 1.08929  | 1.0541   | 1.90423  |
| TCONS_00197558    | XLOC_016977       | -            | lincRNA            | 378   | chr3  | 20227815 | 20235883 | + | 2 | 1.13366 | 3.6718  | 1.63832  | 3.26546   | 0.710655  | 0.800311  | 0.697526 | 1.8944   | 1.66746  |
| TCONS_00197569    | XLOC_016987       | -            | anti-sense_lincRNA | 1244  | chr3  | 24129253 | 24231825 | + | 4 | 2.53938 | 0.33939 | 1.20705  | 0.0613594 | 0.64942   | 0.269802  | 0.224853 | 1.62444  | 0        |
| TCONS_00204802    | XLOC_017007       | -            | lincRNA            | 1587  | chr3  | 30333951 | 30341154 | + | 2 | 0.51487 | 0.35718 | 0.15111  | 1.33878   | 0.488162  | 1.06552   | 0.37971  | 0.290478 | 0.625137 |
| TCONS_00205678    | XLOC_017008       | -            | lincRNA            | 743   | chr3  | 30391827 | 30431337 | + | 2 | 1.87428 | 0.6557  | 0.64973  | 0.943537  | 0.570423  | 0.649917  | 1.09255  | 1.19977  | 1.39258  |
| TCONS_00195765    | XLOC_017014       | -            | lincRNA            | 2044  | chr3  | 32039671 | 32045560 | + | 2 | 1.60501 | 0.72852 | 1.66437  | 1.38848   | 2.46761   | 1.25883   | 1.58326  | 2.13761  | 1.91028  |
| TCONS_00205711    | XLOC_017034       | -            | lincRNA            | 7658  | chr3  | 37420906 | 37431348 | + | 2 | 3.39664 | 3.30129 | 3.1126   | 2.58996   | 3.50418   | 3.74986   | 1.74512  | 3.04089  | 3.35283  |
| TCONS_00201271    | XLOC_017772       | -            | anti-sense_lincRNA | 764   | chr3  | 37845314 | 37903271 | - | 6 | 1.98524 | 4.41735 | 2.87571  | 2.95763   | 1.53711   | 1.7517    | 1.89177  | 1.58723  | 2.37115  |
| TCONS_00195809    | XLOC_017051       | -            | lincRNA            | 1229  | chr3  | 39219394 | 39221197 | + | 2 | 2.37814 | 2.54831 | 3.13004  | 3.9221    | 1.91692   | 2.46371   | 2.11056  | 2.0408   | 1.63136  |
| TCONS_00196638    | XLOC_017787       | -            | anti-sense_lincRNA | 4152  | chr3  | 39540284 | 39544663 | - | 2 | 2.00882 | 2.88333 | 1.22029  | 0.444297  | 0.434079  | 0.249112  | 1.4329   | 1.11636  | 1.11147  |
| TCONS_00196639    | XLOC_017787       | -            | anti-sense_lincRNA | 3867  | chr3  | 39540358 | 39544416 | - | 2 | 9.44739 | 2.20606 | 3.9791   | 0.445824  | 1.34036   | 0.9775    | 2.77238  | 0.853567 | 2.02547  |
| TCONS_00199315    | XLOC_017063       | -            | lincRNA            | 2547  | chr3  | 40807068 | 40817129 | + | 2 | 0.17398 | 2.43862 | 0.53441  | 0.245401  | 0.23564   | 0.119848  | 0.248439 | 0.376617 | 0.614717 |
| TCONS_00200592    | XLOC_017067       | -            | lincRNA            | 1889  | chr3  | 40912863 | 40915591 | + | 2 | 0.60418 | 1.84242 | 0.12395  | 0.227407  | 0.0728332 | 0.16661   | 0.242144 | 0.619454 | 0.341995 |
| TCONS_00199333    | XLOC_017081       | -            | lincRNA            | 2137  | chr3  | 44145551 | 44154836 | + | 2 | 0.5796  | 1.49637 | 0.97206  | 0.165219  | 0.126962  | 0.653626  | 0.39176  | 0.87192  | 0.834631 |
| TCONS_00199925    | XLOC_017819       | -            | lincRNA            | 682   | chr3  | 45954377 | 45957301 | - | 2 | 0.21104 | 1.33134 | 0.73348  | 1.5982    | 0.257389  | 0.293046  | 0.493747 | 0.33865  | 1.6917   |
| TCONS_00213758    | XLOC_017100       | -            | lincRNA            | 632   | chr3  | 46042409 | 46043168 | + | 2 | 0.9414  | 0.16527 | 1.14819  | 0         | 0.575151  | 0.490753  | 0.966931 | 0.946771 | 1.21503  |
| TCONS_00196678    | XLOC_017823       | -            | anti-sense_lincRNA | 1486  | chr3  | 46405474 | 46413157 | - | 2 | 1.1898  | 1.26617 | 1.79363  | 0.995971  | 0.718188  | 0.875711  | 1.36605  | 1.06576  | 1.57371  |
| ENST00000435419.1 | ENSG00000224424.7 | PRKAR2A-AS1  | lincRNA            | 843   | chr3  | 48885005 | 48885926 | + | 2 | 0.79188 | 0.11057 | 0.54729  | 0.698165  | 0.480921  | 0.548431  | 0.459697 | 0.252609 | 0.180634 |
| TCONS_00207377    | XLOC_017153       | -            | lincRNA            | 491   | chr3  | 50650980 | 50651773 | + | 2 | 0.69709 | 0.98738 | 0.24595  | 2.43279   | 0.859317  | 1.46131   | 1.66332  | 0        | 0.403349 |
| ENST00000609204.1 | ENSG00000273356.1 | RP11-804H8.6 | lincRNA            | 845   | chr3  | 50708123 | 50709161 | + | 2 | 1.10521 | 1.54316 | 0.54557  | 1.19313   | 1.1506    | 1.53083   | 0.549893 | 1.13317  | 1.17045  |
| TCONS_00199419    | XLOC_017176       | -            | anti-sense_lincRNA | 445   | chr3  | 52568013 | 52569111 | + | 2 | 0       | 1.76517 | 1.17513  | 1.57795   | 0         | 0.579487  | 0.746687 | 1.01839  | 0.240389 |
| TCONS_00196901    | XLOC_017947       | -            | lincRNA            | 481   | chr3  | 63690946 | 63697525 | - | 2 | 1.4434  | 0.2558  | 1.78482  | 0         | 0.445256  | 0.756889  | 0.215636 | 0.58909  | 0.626978 |
| ENST00000485770.1 | ENSG00000243993.1 | RP11-14D22.2 | lincRNA            | 341   | chr3  | 64430158 | 64431152 | - | 2 | 1.42458 | 2.58917 | 2.08996  | 2.29246   | 1.35406   | 1.01232   | 4.02222  | 1.81345  | 1.6941   |
| TCONS_00202192    | XLOC_017222       | -            | lincRNA            | 11403 | chr3  | 64998292 | 65011634 | + | 2 | 12.2685 | 7.49388 | 9.259434 | 2.68945   | 2.257     | 1.64112   | 3.79464  | 3.4675   | 2.86953  |
| TCONS_00203387    | XLOC_017222       | -            | lincRNA            | 5174  | chr3  | 65003580 | 65009660 | + | 2 | 1.63374 | 3.04584 | 1.33195  | 0.680144  | 0.144779  | 0.470788  | 0.548882 | 0.710159 | 0.230663 |
| TCONS_00199461    | XLOC_017224       | -            | lincRNA            | 391   | chr3  | 65099241 | 65112274 | + | 2 | 1.58636 | 3.79549 | 0.76107  | 0.337966  | 0.330516  | 0         | 0.323632 | 1.31983  | 0.620435 |
| TCONS_00202751    | XLOC_017956       | -            | intronic_lincRNA   | 1276  | chr3  | 65705713 | 65712455 | - | 2 | 3.69614 | 1.05363 | 2.73205  | 1.48847   | 2.9782    | 3.7301    | 1.09048  | 1.42567  | 2.25895  |
| TCONS_00202755    | XLOC_017959       | -            | lincRNA            | 2625  | chr3  | 66633663 | 66647914 | - | 2 | 0.50516 | 0.64099 | 1.12051  | 0.184723  | 0.278719  | 0.0579945 | 0.384652 | 0.530119 | 0.428328 |
| TCONS_00204090    | XLOC_017961       | -            | lincRNA            | 1150  | chr3  | 67291535 | 67292913 | - | 2 | 0.9658  | 0.6717  | 0.95882  | 0.741871  | 1.7527    | 0.667286  | 1.05139  | 2.04202  | 1.3411   |
| TCONS_00199462    | XLOC_017228       | -            | lincRNA            | 5031  | chr3  | 67705148 | 67805032 | + | 5 | 4.69319 | 2.3082  | 4.34758  | 1.15199   | 2.1978    | 2.735     | 2.72052  | 3.3531   | 3.35266  |
| TCONS_00196017    | XLOC              |              |                    |       |       |          |          |   |   |         |         |          |           |           |           |          |          |          |

|                   |                   |               |                   |       |      |           |           |   |   |         |          |          |           |          |           |          |          |          |
|-------------------|-------------------|---------------|-------------------|-------|------|-----------|-----------|---|---|---------|----------|----------|-----------|----------|-----------|----------|----------|----------|
| TCONS_00198635    | XL0C_017968       | -             | intronic_lncRNA   | 5451  | chr3 | 71082789  | 71088901  | - | 2 | 5.58223 | 2.59376  | 4.55544  | 5.60364   | 4.92015  | 5.46054   | 2.75709  | 3.72574  | 3.96228  |
| TCONS_00202769    | XL0C_017973       | -             | lincRNA           | 240   | chr3 | 72734915  | 72741438  | - | 2 | 4.22319 | 3.24156  | 5.09672  | 1.41089   | 0        | 3.13672   | 0        | 0        | 1.34056  |
| TCONS_00196024    | XL0C_017236       | -             | lincRNA           | 261   | chr3 | 72897711  | 72936318  | + | 2 | 3.07132 | 3.48224  | 0        | 0         | 0        | 1.12413   | 1.04524  | 0        | 0.955114 |
| TCONS_00196029    | XL0C_017238       | -             | lincRNA           | 2296  | chr3 | 74662890  | 74673544  | + | 3 | 1.46094 | 0.74186  | 2.66078  | 0.335885  | 0.586522 | 0.603981  | 0.584559 | 0.115069 | 0.385574 |
| TCONS_00202206    | XL0C_017242       | -             | lincRNA           | 6755  | chr3 | 75549381  | 75587510  | + | 2 | 1.66843 | 0.59111  | 2.67673  | 0.386236  | 0.578249 | 1.39269   | 0.57931  | 0.990135 | 0.649665 |
| TCONS_00211775    | XL0C_017242       | -             | lincRNA           | 3766  | chr3 | 75552084  | 75561552  | + | 2 | 4.52231 | 2.10032  | 3.71941  | 0.294548  | 0.950782 | 1.00705   | 2.94879  | 1.21573  | 2.47558  |
| TCONS_00202213    | XL0C_017255       | -             | lincRNA           | 2005  | chr3 | 87841487  | 87872656  | + | 2 | 1.63965 | 1.01852  | 1.00485  | 2.30509   | 0.91986  | 0.584579  | 0.550018 | 0.802298 | 0.863861 |
| TCONS_00205378    | XL0C_018001       | -             | lincRNA           | 462   | chr3 | 98433177  | 98434643  | - | 3 | 0       | 0.54945  | 0        | 0.737435  | 0        | 0         | 1.39201  | 0        | 0.448933 |
| TCONS_00212172    | XL0C_018004       | -             | lincRNA           | 888   | chr3 | 99141706  | 99143366  | - | 3 | 1.48049 | 0.72297  | 0.81764  | 0.186393  | 0.449204 | 1.22982   | 2.3171   | 0.35379  | 0.337447 |
| TCONS_00215527    | XL0C_017270       | -             | anti-sense_lncRNA | 9847  | chr3 | 99739800  | 99806573  | + | 2 | 2.09665 | 1.27223  | 1.00116  | 1.19997   | 1.36701  | 1.58048   | 0.596049 | 0.921815 | 1.32567  |
| TCONS_00212175    | XL0C_018010       | -             | intronic_lncRNA   | 2958  | chr3 | 100529914 | 100534675 | - | 3 | 2.92443 | 2.25377  | 2.02007  | 0.835224  | 0.623629 | 0.662814  | 1.5844   | 0.902672 | 0.334673 |
| TCONS_00212177    | XL0C_018009       | -             | intronic_lncRNA   | 1084  | chr3 | 100553326 | 100557737 | - | 4 | 4.84274 | 1.04312  | 1.90361  | 0.434933  | 0.628136 | 0.557864  | 2.1289   | 1.37256  | 0.262156 |
| TCONS_00202808    | XL0C_018015       | -             | lincRNA           | 4351  | chr3 | 104076057 | 104239528 | - | 3 | 0.62051 | 0.01024  | 1.49155  | 0.639218  | 0.594635 | 1.08758   | 1.06905  | 1.65739  | 2.26567  |
| TCONS_00207901    | XL0C_018015       | -             | lincRNA           | 4636  | chr3 | 104076064 | 104175877 | - | 2 | 0.36324 | 0.46775  | 1.91E-05 | 0.454591  | 0.218473 | 0.249857  | 0.20617  | 1.41455  | 0.842911 |
| TCONS_00212186    | XL0C_018022       | -             | lincRNA           | 363   | chr3 | 106404560 | 106407612 | - | 2 | 4.94468 | 2.23242  | 2.24519  | 0.792858  | 0.388957 | 1.3121    | 1.91492  | 1.03865  | 0.730061 |
| TCONS_00200131    | XL0C_018024       | -             | lincRNA           | 2628  | chr3 | 106468575 | 106559771 | - | 2 | 2.18633 | 1.83328  | 1.52085  | 0.448059  | 0.354294 | 0.492344  | 0.552251 | 0.364005 | 0.261432 |
| TCONS_00202813    | XL0C_018025       | -             | lincRNA           | 11391 | chr3 | 106528002 | 106539791 | - | 2 | 2.89369 | 1.44955  | 2.297    | 0.48576   | 0.515167 | 0.897782  | 0.653832 | 0.536843 | 0.458098 |
| TCONS_00200132    | XL0C_018026       | -             | lincRNA           | 619   | chr3 | 106561820 | 106562549 | - | 2 | 1.6983  | 1.19323  | 0.33845  | 0.153299  | 0.44493  | 0.506074  | 0.142545 | 0        | 1.11398  |
| TCONS_00212188    | XL0C_018030       | -             | anti-sense_lncRNA | 787   | chr3 | 107018907 | 107140357 | - | 4 | 0       | 0        | 0.34072  | 0.207398  | 0.220679 | 0         | 1.28127  | 0        | 0.207321 |
| TCONS_00202817    | XL0C_018030       | -             | lincRNA           | 455   | chr3 | 107099451 | 107103554 | - | 3 | 3.57587 | 1.69453  | 2.58249  | 0.783637  | 1.69798  | 1.66963   | 3.17457  | 2.60538  | 1.82443  |
| TCONS_00205933    | XL0C_017307       | -             | lincRNA           | 1797  | chr3 | 109826567 | 109829339 | + | 3 | 0.44726 | 0.39864  | 0.21855  | 1.5634    | 0.231132 | 1.27763   | 0.3294   | 0.70576  | 1.59177  |
| TCONS_00200138    | XL0C_018047       | -             | lincRNA           | 371   | chr3 | 110787985 | 110790375 | - | 2 | 0.58966 | 1.70039  | 0.42711  | 0.755558  | 0.370277 | 1.25013   | 1.45581  | 1.48173  | 0.695025 |
| TCONS_00196096    | XL0C_017317       | -             | lincRNA           | 726   | chr3 | 112020886 | 112025810 | + | 2 | 1.74115 | 0.54169  | 0.13422  | 0         | 0.235624 | 0.402616  | 0.451477 | 0.309811 | 0.221241 |
| TCONS_00211812    | XL0C_017320       | -             | lincRNA           | 1626  | chr3 | 112520994 | 112523261 | + | 2 | 0.00206 | 2.45E-05 | 0.88878  | 0.220727  | 4.55019  | 2.69397   | 0.645535 | 0.320296 | 1.71636  |
| TCONS_00204981    | XL0C_017320       | -             | lincRNA           | 1722  | chr3 | 112520994 | 112523261 | + | 3 | 0.86429 | 0.5113   | 0.0001   | 0.66107   | 1.7391   | 0.0013027 | 1.04748  | 2.76808  | 2.44086  |
| ENST00000519700.1 | ENSG00000242770.2 | RP11-180K7.1  | lincRNA           | 592   | chr3 | 112521443 | 112522451 | + | 2 | 1.05734 | 0        | 0.69799  | 1.37169   | 6.27648  | 4.21773   | 0        | 1.0488   | 5.26816  |
| TCONS_00201551    | XL0C_018068       | -             | intronic_lncRNA   | 4533  | chr3 | 114300532 | 114305836 | - | 2 | 7.56566 | 5.27795  | 6.98343  | 5.97935   | 5.35477  | 5.87196   | 3.62477  | 5.64598  | 5.21525  |
| TCONS_00212212    | XL0C_018073       | -             | lincRNA           | 4920  | chr3 | 117571653 | 117716424 | - | 2 | 1.92573 | 1.0467   | 2.34289  | 0.298162  | 3.06875  | 4.27348   | 2.98181  | 2.41267  | 0.940331 |
| TCONS_00211230    | XL0C_018081       | -             | lincRNA           | 1817  | chr3 | 119383092 | 119386503 | - | 2 | 2.65039 | 1.31232  | 1.98563  | 1.18772   | 2.85329  | 3.13274   | 1.40961  | 2.24029  | 1.71492  |
| TCONS_00202849    | XL0C_018091       | -             | lincRNA           | 1246  | chr3 | 120530396 | 120543596 | - | 2 | 0.87734 | 0.40649  | 1.07086  | 0.183726  | 0.235699 | 0.0673213 | 0.89767  | 0.308821 | 0.442677 |
| ENST00000511301.1 | ENSG00000250012.1 | RP11-124N2.1  | intronic_lncRNA   | 327   | chr3 | 125803063 | 125804295 | + | 2 | 0       | 1.15193  | 2.91325  | 1.0178    | 0        | 2.81048   | 0        | 0.674246 | 0.471241 |
| TCONS_00198809    | XL0C_018137       | -             | intronic_lncRNA   | 1221  | chr3 | 128210058 | 128211374 | - | 2 | 1.99728 | 1.3189   | 1.57739  | 1.69409   | 0.724507 | 0.620765  | 0.574946 | 0.712017 | 0.510272 |
| TCONS_00215575    | XL0C_017392       | -             | lincRNA           | 717   | chr3 | 128903233 | 128915541 | + | 2 | 0.78726 | 0.27561  | 1.09275  | 0.248268  | 0.479542 | 0.955874  | 0.459524 | 0.472955 | 1.12567  |
| TCONS_00207515    | XL0C_017400       | -             | lincRNA           | 324   | chr3 | 129898440 | 129920425 | + | 2 | 0.80682 | 1.77026  | 1.79191  | 0.521128  | 0.514657 | 1.72702   | 0        | 0        | 0.48284  |
| TCONS_00200231    | XL0C_018153       | -             | anti-sense_lncRNA | 328   | chr3 | 130363509 | 130366860 | - | 2 | 0       | 3.42841  | 0        | 0         | 0.996546 | 0         | 0        | 0        | 0        |
| TCONS_00210155    | XL0C_018166       | -             | intronic_lncRNA   | 2004  | chr3 | 133079390 | 133082258 | - | 2 | 0.396   | 0.31357  | 0.11601  | 0.0709652 | 0.102264 | 0.155974  | 0.453209 | 0.356776 | 1.05642  |
| TCONS_00210161    | XL0C_018180       | -             | anti-sense_lncRNA | 5561  | chr3 | 137737501 | 137750668 | - | 2 | 6.30599 | 3.75149  | 4.6434   | 2.24317   | 2.07187  | 2.70044   | 2.45096  | 2.03396  | 3.04237  |
| TCONS_00196244    | XL0C_017447       | -             | lincRNA           | 391   | chr3 | 138695928 | 138700170 | + | 2 | 2.11514 | 0        | 0        | 0         | 0        | 0         | 0.970896 | 0        | 0.310218 |
| TCONS_00196249    | XL0C_017451       | -             | intronic_lncRNA   | 412   | chr3 | 140053794 | 140078624 | + | 2 | 2.86213 | 0.68219  | 1.0241   | 0         | 0        | 0.335348  | 0.289826 | 0        | 0.5575   |
| TCONS_00209809    | XL0C_017457       | -             | lincRNA           | 302   | chr3 | 141439828 | 141448773 | + | 3 | 0       | 0        | 1.46077  | 0         | 0        | 0.698245  | 1.25821  | 1.69128  | 0.587819 |
| TCONS_00205060    | XL0C_017466       | -             | lincRNA           | 1655  | chr3 | 143956704 | 143990624 | + | 3 | 1.54264 | 1.26445  | 0.76802  | 1.0121    | 0.67674  | 0.483634  | 1.28646  | 0.996534 | 0.714971 |
| TCONS_00199661    | XL0C_017466       | -             | lincRNA           | 866   | chr3 | 144186933 | 144190130 | + | 2 | 1.83509 | 0.74705  | 1.26752  | 1.05912   | 1.02117  | 0.95295   | 0.709646 | 0.853167 | 0.174344 |
| TCONS_00199662    | XL0C_017467       | -             | lincRNA           | 289   | chr3 | 144241381 | 144242302 | + | 2 | 1.10352 | 4.10039  | 0.83805  | 0.719745  | 0.71713  | 0         | 1.44795  | 0.970587 | 0        |
| ENST00000482351.1 | ENSG00000244358.1 | RP11-88H10.2  | lincRNA           | 624   | chr3 | 145657755 | 145675618 | + | 2 | 0.23977 | 0        | 0.33437  | 0.151483  | 3.22382  | 2.00028   | 0        | 0        | 0        |
| TCONS_00200297    | XL0C_018213       | -             | lincRNA           | 382   | chr3 | 148991287 | 148991952 | - | 2 | 0       | 0        | 0.80038  | 0.3548    | 0.694618 | 1.17381   | 1.02189  | 0.462715 | 1.30388  |
| ENST00000471093.1 | ENSG00000240137.1 | RP11-103G8.2  | anti-sense_lncRNA | 302   | chr3 | 150421351 | 150437775 | + | 3 | 11.6648 | 8.61197  | 10.2254  | 2.52559   | 8.1482   | 6.2842    | 5.03282  | 6.76512  | 2.9391   |
| TCONS_00215946    | XL0C_018236       | -             | anti-sense_lncRNA | 2244  | chr3 | 151143202 | 151150712 | - | 2 | 4.1477  | 1.91966  | 1.69889  | 0.409597  | 0.677842 | 0.849459  | 1.80309  | 0.960087 | 1.77787  |
| TCONS_00204490    | XL0C_018236       | -             | anti-sense_lncRNA | 2579  | chr3 | 151146653 | 151150581 | - | 2 | 3.90222 | 1.88565  | 1.32364  | 0.347519  | 0.580164 | 0.659555  | 1.12348  | 0.729316 | 0.923049 |
| TCONS_00201765    | XL0C_018236       | -             | lincRNA           | 8017  | chr3 | 151252632 | 151322016 | - | 3 | 7.73584 | 2.79761  | 4.01859  | 1.1864    | 1.96978  | 2.18431   | 2.20741  | 2.12198  | 2.35115  |
| TCONS_00209354    | XL0C_018239       | -             | lincRNA           | 1552  | chr3 | 151891208 | 151923258 | - | 2 | 0.67908 | 0.52353  | 1.03364  | 1.13668   | 1.54809  | 1.14521   | 0.173168 | 0.53649  | 1.02622  |
| TCONS_00202395    | XL0C_017497       | -             | lincRNA           | 2141  | chr3 | 151921721 | 151964213 | + | 2 | 2.1033  | 1.74823  | 3.41314  | 2.67103   | 2.85073  | 2.42792   | 1.17284  | 4.06053  | 7.10945  |
| TCONS_00204494    | XL0C_018243       | -             | lincRNA           | 1205  | chr3 | 152212976 | 152215272 | - | 3 | 3.75367 | 0.7758   | 2.22987  | 0.063745  | 0.736107 | 1.05112   | 0.934736 | 0.723459 | 1.2097   |
| TCONS_00211900    | XL0C_017501       | -             | lincRNA           | 662   | chr3 | 152921440 | 152969555 | + | 4 | 0.44028 | 1.69847  | 0.76585  | 1.25075   | 0.671674 | 0.458705  | 3.60986  | 0.884029 | 0.630652 |
| ENST00000462300.1 | ENSG00000241912.1 | RP11-292E2.2  | lincRNA           | 382   | chr3 | 153094620 | 153095351 | + | 2 | 0.55456 | 1.19638  | 2.00094  | 0         | 0        | 0.782538  | 0.34063  | 1.38814  | 1.95582  |
| TCONS_00214313    | XL0C_018245       | -             | lincRNA           | 404   | chr3 | 153659535 | 153661048 | - | 2 | 0.49551 | 0.3548   | 0.71061  | 0         | 1.85352  | 1.04593   | 0        | 1.23215  | 0.289959 |
| TCONS_00208041    | XL0C_018248       | -             | lincRNA           | 339   | chr3 | 154968518 | 154976648 | - | 2 | 0       | 0        | 0        | 0         | 0        | 0         | 1.36128  | 0        | 0        |
| ENST00000492937.1 | ENSG00000243926.1 | TIPARP-AS1    | anti-sense_lncRNA | 441   | chr3 | 156389651 | 156392167 | - | 2 | 0.84036 | 2.69265  | 2.39067  | 1.06955   | 2.34391  | 1.76761   | 4.5582   | 2.4172   | 1.95574  |
| TCONS_00209829    | XL0C_017516       | -             | lincRNA           | 2200  | chr3 | 156892078 | 156894531 | + | 2 | 2.57163 | 1.9382   | 3.24228  | 2.27539   | 2.54649  | 2.32927   | 2.18853  | 3.15328  | 2.2516   |
| ENST00000460796.1 | ENSG00000243176.1 | RP11-550I24.2 | lincRNA           | 542   | chr3 | 156893012 | 156957753 | + | 2 | 0.77442 | 2.96626  | 1.04161  | 0.732956  | 0.210363 | 1.60723   | 1.23061  | 1.34045  | 1.3689   |
| TCONS_00212315    | XL0C_018263       | -             | lincRNA           |       |      |           |           |   |   |         |          |          |           |          |           |          |          |          |

|                   |                   |               |                    |       |      |           |           |   |   |         |         |          |           |           |           |           |           |           |
|-------------------|-------------------|---------------|--------------------|-------|------|-----------|-----------|---|---|---------|---------|----------|-----------|-----------|-----------|-----------|-----------|-----------|
| TCONS_00198125    | XLOC_017527       | -             | lincRNA            | 464   | chr3 | 160283600 | 160340668 | + | 2 | 2.30334 | 1.363   | 1.3597   | 0.731811  | 0.474537  | 1.61218   | 1.8413    | 0.628362  | 1.78185   |
| TCONS_00202980    | XLOC_018272       | -             | lincRNA            | 268   | chr3 | 162408072 | 162408655 | - | 2 | 1.4017  | 2.10925 | 1.08708  | 0         | 0         | 0         | 0         | 2.51938   | 0         |
| TCONS_00201801    | XLOC_018277       | -             | lincRNA            | 534   | chr3 | 166620855 | 166647343 | - | 3 | 0       | 0.42911 | 0        | 0         | 0.746809  | 0.211956  | 0.900835  | 0         | 0.17528   |
| TCONS_00200332    | XLOC_018277       | -             | lincRNA            | 560   | chr3 | 166678511 | 166689483 | - | 2 | 1.69284 | 1.59059 | 0.3953   | 0.535663  | 0.865022  | 0.393077  | 0.666841  | 0.456451  | 0.162425  |
| TCONS_00197271    | XLOC_018278       | -             | lincRNA            | 10260 | chr3 | 166792966 | 166817509 | - | 3 | 4.88131 | 1.35624 | 1.69243  | 0.245037  | 0.809641  | 1.3185    | 1.83783   | 1.77726   | 1.76209   |
| TCONS_00198995    | XLOC_018278       | -             | lincRNA            | 7767  | chr3 | 166795474 | 166858543 | - | 5 | 4.49881 | 1.40857 | 2.97168  | 0.455267  | 0.986355  | 0.596966  | 1.54884   | 0.607488  | 1.95934   |
| TCONS_00211450    | XLOC_018278       | -             | lincRNA            | 1323  | chr3 | 166805009 | 166858557 | - | 4 | 13.0785 | 3.37332 | 5.81998  | 0.604267  | 2.2792    | 2.44069   | 3.70454   | 2.40456   | 3.75804   |
| TCONS_00199707    | XLOC_017547       | -             | lincRNA            | 425   | chr3 | 170130370 | 170131014 | + | 2 | 0       | 0.32095 | 0        | 0.286546  | 0         | 0.315773  | 0.272201  | 1.48346   | 0.524535  |
| TCONS_00198140    | XLOC_017547       | -             | lincRNA            | 1519  | chr3 | 170425861 | 170579167 | + | 2 | 1.62411 | 0.64401 | 0.68879  | 0.388386  | 0.60679   | 0.21344   | 0.621392  | 1.10002   | 0.350667  |
| TCONS_00213573    | XLOC_018294       | -             | lincRNA            | 4740  | chr3 | 170427443 | 170454040 | - | 2 | 1.97955 | 2.06766 | 3.06409  | 0.71861   | 1.02747   | 4.83004   | 1.28114   | 1.99622   | 0.799902  |
| TCONS_00204613    | XLOC_018301       | -             | intronic_lincRNA   | 2998  | chr3 | 171411220 | 171414339 | - | 2 | 6.16668 | 2.22149 | 4.10665  | 2.33262   | 3.68818   | 4.57331   | 2.22796   | 1.57854   | 2.35039   |
| TCONS_00196351    | XLOC_017552       | -             | lincRNA            | 2737  | chr3 | 171700776 | 171715447 | + | 2 | 2.17296 | 1.22526 | 1.12579  | 0.100893  | 0.290604  | 0.33259   | 0.505436  | 0.538294  | 0.523093  |
| TCONS_00202428    | XLOC_017554       | -             | intronic_lincRNA   | 420   | chr3 | 172409770 | 172411122 | + | 2 | 0.91983 | 0.98523 | 0.98544  | 0.586214  | 0         | 0.323035  | 1.11489   | 0.379639  | 0.805115  |
| TCONS_00211925    | XLOC_017558       | -             | lincRNA            | 603   | chr3 | 174158731 | 174410141 | + | 4 | 0.99309 | 0.60819 | 1.06917  | 0.189684  | 0.707455  | 0.556857  | 1.75372   | 0.203328  | 0.155272  |
| TCONS_00196360    | XLOC_017558       | -             | lincRNA            | 3742  | chr3 | 174158770 | 174458987 | + | 4 | 0.63175 | 0.26398 | 0.15754  | 7.80E-05  | 0.002701  | 0.225034  | 0.531454  | 0         | 0         |
| TCONS_00201029    | XLOC_017558       | -             | lincRNA            | 898   | chr3 | 174240942 | 174271889 | + | 3 | 0.63904 | 1.8747  | 0.69408  | 1.74532   | 0.907381  | 0.884905  | 1.13123   | 0.926941  | 0.704588  |
| TCONS_00201030    | XLOC_017558       | -             | lincRNA            | 855   | chr3 | 174241136 | 174271977 | + | 4 | 2.54995 | 1.51205 | 1.6578   | 0         | 0.692236  | 0.807015  | 0.680735  | 1.85503   | 0.78196   |
| TCONS_00213957    | XLOC_017558       | -             | lincRNA            | 4594  | chr3 | 174241152 | 174459768 | + | 3 | 0       | 0.06975 | 0.00017  | 0         | 0         | 0.0001074 | 7.77E-05  | 0.0078061 | 0.534783  |
| TCONS_00207596    | XLOC_017558       | -             | lincRNA            | 1870  | chr3 | 174241246 | 174250867 | + | 2 | 1.71092 | 1.05878 | 1.37903  | 0.536678  | 1.32597   | 1.59027   | 0.9097    | 0.578352  | 0.933936  |
| TCONS_00199716    | XLOC_017558       | -             | lincRNA            | 7458  | chr3 | 174241247 | 174462664 | + | 4 | 3.49541 | 1.66832 | 2.18891  | 1.74314   | 2.14425   | 1.53184   | 1.46436   | 1.98343   | 1.15798   |
| TCONS_00208641    | XLOC_017561       | -             | lincRNA            | 1790  | chr3 | 177468882 | 177485108 | + | 4 | 1.92524 | 0.80081 | 0.70245  | 10.7102   | 4.91391   | 7.65531   | 6.28636   | 3.49379   | 3.88799   |
| TCONS_00205099    | XLOC_017564       | -             | lincRNA            | 3514  | chr3 | 177613418 | 177617718 | + | 2 | 0.40055 | 0.38353 | 0.08401  | 0.984607  | 0.463234  | 1.40002   | 0.650022  | 0.605485  | 0.382841  |
| TCONS_00209848    | XLOC_017564       | -             | lincRNA            | 639   | chr3 | 177624618 | 177643071 | + | 2 | 0.23162 | 0       | 0        | 0.292569  | 0.28293   | 1.93152   | 0.679342  | 0.931348  | 0.531293  |
| ENST00000418585.1 | ENSG00000223930.1 | RP11-33A14.1  | lincRNA            | 640   | chr3 | 178052810 | 178103164 | - | 3 | 0.46218 | 0       | 0.48295  | 1.98829   | 1.69367   | 1.92711   | 2.46026   | 0.185837  | 0.132517  |
| TCONS_00203001    | XLOC_018314       | -             | lincRNA            | 688   | chr3 | 178100527 | 178103325 | - | 2 | 0.41692 | 0.43826 | 1.01402  | 1.23345   | 0.508374  | 0.723559  | 1.80992   | 0.334405  | 0.596666  |
| TCONS_00196366    | XLOC_017565       | -             | lincRNA            | 4542  | chr3 | 178137060 | 178205342 | + | 2 | 4.49236 | 0.63399 | 0.88113  | 0.235731  | 0.791653  | 1.00361   | 0.468902  | 0.609608  | 0.570894  |
| TCONS_00197309    | XLOC_018316       | -             | lincRNA            | 768   | chr3 | 178625728 | 178627428 | - | 2 | 1.61289 | 0.75188 | 0.37241  | 0.112951  | 0.109013  | 0         | 0.313027  | 0.573041  | 0.614181  |
| TCONS_00210231    | XLOC_018324       | -             | lincRNA            | 6439  | chr3 | 180424839 | 180459706 | - | 5 | 0.63619 | 0.27191 | 3.56E-05 | 0.0099489 | 0.0003959 | 1.95493   | 6.93E-05  | 0.0006307 | 0.0002101 |
| TCONS_00200365    | XLOC_018324       | -             | lincRNA            | 6460  | chr3 | 180424839 | 180459706 | - | 5 | 0.71385 | 1.23027 | 1.11902  | 1.17141   | 1.87136   | 1.94249   | 0.971865  | 0.592521  | 0.475886  |
| TCONS_00200366    | XLOC_018324       | -             | lincRNA            | 4026  | chr3 | 180426667 | 180458980 | - | 6 | 0.54461 | 0.79508 | 0.13765  | 0.664944  | 1.26239   | 0.980874  | 0.3752    | 0.0174502 | 0.0671075 |
| TCONS_00202442    | XLOC_017574       | -             | lincRNA            | 685   | chr3 | 180774494 | 180893864 | + | 3 | 2.51693 | 0.88201 | 1.89504  | 0.529425  | 0.383667  | 1.16489   | 0.245308  | 0.504771  | 0.36024   |
| TCONS_00202443    | XLOC_017575       | -             | lincRNA            | 352   | chr3 | 181281397 | 181319130 | + | 2 | 2.64761 | 0.47958 | 1.44917  | 1.27574   | 0         | 0.4693    | 0         | 0.558762  | 0         |
| TCONS_00202469    | XLOC_017598       | -             | lincRNA            | 362   | chr3 | 184225971 | 184226454 | + | 2 | 0       | 0.44931 | 0        | 0         | 0         | 0         | 1.1565    | 0         | 0         |
| TCONS_00213997    | XLOC_017615       | -             | lincRNA            | 482   | chr3 | 187661749 | 187662466 | + | 2 | 2.15748 | 1.52924 | 2.79447  | 0         | 0.443645  | 0.251394  | 1.71871   | 1.7608    | 0.624711  |
| ENST00000444488.1 | ENSG00000234076.1 | TPRG1-AS1     | lincRNA            | 697   | chr3 | 188659504 | 188665428 | - | 2 | 3.27522 | 4.5892  | 11.9439  | 1.16234   | 3.74297   | 2.55739   | 4.78475   | 1.80529   | 1.17148   |
| TCONS_00201098    | XLOC_017618       | -             | lincRNA            | 2323  | chr3 | 188839138 | 188841750 | + | 2 | 1.10582 | 0.7657  | 1.54324  | 1.38673   | 0.694851  | 1.22571   | 0.934324  | 0.71946   | 0.652557  |
| TCONS_00203048    | XLOC_018381       | -             | lincRNA            | 444   | chr3 | 193307798 | 193310893 | - | 2 | 0.83013 | 0.29543 | 1.77017  | 0         | 0.514319  | 1.45471   | 0.499933  | 0.681817  | 1.20698   |
| TCONS_00196470    | XLOC_017629       | -             | lincRNA            | 328   | chr3 | 193509192 | 193509739 | + | 2 | 1.56489 | 0       | 0        | 0         | 0.498273  | 0         | 0         | 0         | 0         |
| ENST00000445168.1 | ENSG00000229155.1 | RP11-528A4.2  | lincRNA            | 788   | chr3 | 193560600 | 193561813 | - | 2 | 1.03882 | 0.48404 | 1.07865  | 0.109097  | 1.36849   | 0.239983  | 0.604314  | 0.829854  | 0.889609  |
| TCONS_00197412    | XLOC_018406       | -             | anti-sense_lincRNA | 379   | chr3 | 195941054 | 195946320 | - | 3 | 1.12743 | 0.81128 | 1.62877  | 0.360788  | 0.353289  | 0         | 0.693388  | 0         | 0.663158  |
| TCONS_00225312    | XLOC_018432       | -             | lincRNA            | 3326  | chr4 | 190706    | 194140    | + | 2 | 1.27386 | 1.26508 | 1.24712  | 0.961986  | 1.82705   | 1.61923   | 0.968698  | 1.36106   | 1.05167   |
| TCONS_00222099    | XLOC_018991       | -             | lincRNA            | 1650  | chr4 | 300556    | 331172    | - | 2 | 0.56289 | 0.29281 | 1.30053  | 0.441565  | 0.551754  | 0.436774  | 0.847173  | 0.499996  | 0.239149  |
| TCONS_00220737    | XLOC_018457       | -             | lincRNA            | 1201  | chr4 | 2464760   | 2467160   | + | 3 | 2.13896 | 2.12431 | 1.67915  | 0.320001  | 1.04701   | 1.05533   | 1.70106   | 1.04921   | 0.983213  |
| TCONS_00218725    | XLOC_018462       | -             | anti-sense_lincRNA | 2429  | chr4 | 2936496   | 2939915   | + | 3 | 2.78104 | 2.04151 | 1.66621  | 1.86976   | 2.41731   | 1.03199   | 1.32844   | 1.91266   | 1.52133   |
| TCONS_00226964    | XLOC_018462       | -             | lincRNA            | 1806  | chr4 | 2936655   | 2939610   | + | 2 | 2.93994 | 1.83257 | 2.72561  | 1.0714    | 1.77456   | 2.50982   | 2.30117   | 1.8525    | 2.63492   |
| TCONS_00227507    | XLOC_018471       | -             | lincRNA            | 1774  | chr4 | 4037173   | 4076484   | + | 4 | 10.6315 | 10.9661 | 9.80174  | 1.83031   | 4.92495   | 2.41385   | 9.32187   | 3.2226    | 5.10227   |
| TCONS_00221780    | XLOC_018489       | -             | lincRNA            | 353   | chr4 | 6765225   | 6769312   | + | 2 | 0       | 0.95275 | 1.91903  | 0         | 0         | 0.466209  | 0         | 1.10987   | 0         |
| TCONS_00217466    | XLOC_018499       | -             | lincRNA            | 416   | chr4 | 8512435   | 8517158   | + | 2 | 0.46829 | 1.0039  | 1.67399  | 0.597152  | 0.582674  | 0         | 0         | 0.386961  | 1.09385   |
| TCONS_00219349    | XLOC_019061       | -             | lincRNA            | 2754  | chr4 | 9035403   | 9075423   | - | 3 | 3.7574  | 3.29167 | 2.31836  | 0.576269  | 1.51549   | 0.908528  | 2.30489   | 2.07589   | 1.55881   |
| TCONS_00218084    | XLOC_019062       | -             | lincRNA            | 796   | chr4 | 9068157   | 9071399   | - | 2 | 2.22067 | 1.79057 | 2.12792  | 0.215256  | 1.03842   | 0.710243  | 0.198678  | 1.22781   | 1.07257   |
| TCONS_00219350    | XLOC_019063       | -             | lincRNA            | 929   | chr4 | 9152601   | 9153982   | - | 2 | 0.97823 | 1.26658 | 1.63858  | 0.439707  | 1.10173   | 0.967002  | 0.323644  | 1.11212   | 0.477484  |
| TCONS_00218085    | XLOC_019065       | -             | lincRNA            | 2851  | chr4 | 9600688   | 9606655   | - | 2 | 3.54301 | 1.35899 | 1.97051  | 0.337929  | 1.3904    | 0.424365  | 0.92324   | 0.908937  | 0.848761  |
| TCONS_00219941    | XLOC_018506       | -             | lincRNA            | 3743  | chr4 | 11470662  | 11479771  | + | 3 | 1.55451 | 0.82549 | 7.05E-05 | 0         | 0.671818  | 0.569476  | 0.0001266 | 0         | 0.518347  |
| TCONS_00222518    | XLOC_018506       | -             | lincRNA            | 1028  | chr4 | 11470858  | 11553932  | + | 2 | 1.33615 | 5.45562 | 1.91021  | 2.99825   | 2.11147   | 3.968     | 4.12934   | 3.52032   | 6.27546   |
| ENST00000515343.1 | ENSG00000251152.1 | RP11-281P23.1 | lincRNA            | 4019  | chr4 | 11470874  | 11479820  | + | 2 | 0.54034 | 3.82501 | 1.44762  | 2.95275   | 3.48692   | 3.21491   | 6.04799   | 6.72269   | 7.1034    |
| TCONS_00228001    | XLOC_019079       | -             | intronic_lincRNA   | 818   | chr4 | 15362400  | 15364353  | - | 2 | 0.32952 | 0.46034 | 0.68369  | 0.830279  | 0.300334  | 1.3697    | 1.05306   | 0.525969  | 0.376015  |
| TCONS_00225659    | XLOC_019084       | -             | lincRNA            | 437   | chr4 | 16126338  | 16127434  | - | 2 | 0.42721 | 0.30434 | 0        | 0         | 0.264931  | 0.299624  | 0         | 2.45957   | 0.497376  |
| TCONS_00222527    | XLOC_018523       | -             | lincRNA            | 1039  | chr4 | 16289204  | 16325006  | + | 4 | 1.43165 | 1.78044 | 1.14965  | 0.0257509 | 0.821055  | 2.00489   | 2.89608   | 1.56612   | 0.769087  |
| TCONS_00222528    | XLOC_018523       | -             | lincRNA            | 880   | chr4 | 16289249  | 16324839  | + | 5 | 3.32735 | 4.17479 | 2.09442  | 0.722578  | 0.62167   | 0.531678  | 2.23325   | 0.807345  | 1.01294   |
| TCONS_002220371   | XLOC_019087       | -             | lincRNA            | 305   | chr4 | 17078892  | 17079386  | - | 2 | 0.94584 | 2.09197 | 3.54544  | 0         | 0         | 0         | 0         | 1.64185   | 0         |
| TCONS_00220788    | X                 |               |                    |       |      |           |           |   |   |         |         |          |           |           |           |           |           |           |

|                   |                   |              |                    |       |      |           |           |   |   |         |          |          |           |           |           |           |          |           |
|-------------------|-------------------|--------------|--------------------|-------|------|-----------|-----------|---|---|---------|----------|----------|-----------|-----------|-----------|-----------|----------|-----------|
| TCONS_00229101    | XLOC_018551       | -            | lincRNA            | 678   | chr4 | 26846604  | 26849619  | + | 2 | 2.76642 | 0.29836  | 0.73973  | 0.671511  | 0.519137  | 0.443267  | 1.12047   | 0.68308  | 0.365577  |
| TCONS_00220393    | XLOC_019116       | -            | lincRNA            | 2293  | chr4 | 36013528  | 36049457  | - | 4 | 2.73099 | 1.11439  | 2.39815  | 0.461067  | 0.50410   | 0.680391  | 1.31019   | 2.72693  | 2.39951   |
| TCONS_00223944    | XLOC_019116       | -            | lincRNA            | 510   | chr4 | 36014141  | 36020962  | - | 2 | 0       | 0        | 0        | 0.398864  | 0.928155  | 1.08581   | 0         | 0.26812  | 0         |
| TCONS_00223119    | XLOC_019117       | -            | lincRNA            | 1701  | chr4 | 36270623  | 36283136  | - | 3 | 8.69117 | 5.15862  | 5.13904  | 0.810431  | 1.59546   | 1.2068    | 5.20013   | 2.84618  | 3.42125   |
| TCONS_00219413    | XLOC_019117       | -            | lincRNA            | 1081  | chr4 | 36275206  | 36283184  | - | 2 | 2.56153 | 0.85029  | 1.87306  | 0.290945  | 0.916137  | 0.420386  | 1.437     | 1.83223  | 0.534894  |
| TCONS_00225364    | XLOC_018563       | -            | lincRNA            | 284   | chr4 | 38157110  | 38158816  | + | 2 | 1.1633  | 0        | 2.66244  | 0         | 3.03406   | 0.841551  | 1.53525   | 1.02796  | 1.42208   |
| TCONS_00218840    | XLOC_018567       | -            | lincRNA            | 2102  | chr4 | 38749953  | 38754549  | + | 3 | 1.04372 | 2.16304  | 4.40751  | 2.63662   | 0.82371   | 0.772211  | 1.43774   | 3.94488  | 7.29692   |
| TCONS_00221822    | XLOC_018567       | -            | lincRNA            | 2571  | chr4 | 38752213  | 38755475  | + | 2 | 1.78889 | 0.94789  | 1.93369  | 0.0715688 | 0.246695  | 0.092507  | 1.01212   | 1.10866  | 2.2548    |
| TCONS_00219996    | XLOC_018573       | -            | lincRNA            | 397   | chr4 | 39640749  | 39643544  | + | 2 | 0.51289 | 1.47085  | 0.73693  | 0.655196  | 0.320188  | 0.722336  | 1.25281   | 0.851917 | 0.601058  |
| ENST00000510551.1 | ENSG00000249241.1 | AC195454.1   | lincRNA            | 957   | chr4 | 40318502  | 40332436  | + | 3 | 1.19886 | 0.41792  | 1.18977  | 0.115904  | 0.870258  | 0.155302  | 0.228117  | 0.456373 | 0.459277  |
| TCONS_00220004    | XLOC_018578       | -            | lincRNA            | 454   | chr4 | 40318519  | 40332403  | + | 3 | 1.23358 | 1.28864  | 4.5782   | 0.413704  | 1.06964   | 1.21029   | 0.256563  | 0.240902 | 0.0012579 |
| TCONS_00224870    | XLOC_019135       | -            | lincRNA            | 2003  | chr4 | 43980861  | 44027709  | - | 2 | 0.90564 | 0.35296  | 0.23215  | 2.27215   | 0.648029  | 2.45796   | 0.226731  | 0.580084 | 0.352335  |
| TCONS_00229926    | XLOC_018587       | -            | lincRNA            | 367   | chr4 | 44509319  | 44510003  | + | 2 | 0       | 0.87107  | 0        | 0         | 0         | 0         | 0         | 1.51892  | 0         |
| TCONS_00218882    | XLOC_018599       | -            | lincRNA            | 275   | chr4 | 49104151  | 49110227  | + | 2 | 3.86209 | 2.89313  | 2.97264  | 0         | 0         | 0         | 2.57723   | 1.148    | 0         |
| TCONS_00225704    | XLOC_019151       | -            | lincRNA            | 861   | chr4 | 49289048  | 49302226  | - | 2 | 0.46223 | 0        | 0.10644  | 0         | 0.187085  | 0         | 0.804503  | 0.122816 | 0         |
| TCONS_00226575    | XLOC_019162       | -            | lincRNA            | 2098  | chr4 | 54488288  | 54649343  | - | 3 | 1.35253 | 0.427    | 0.19978  | 0.332828  | 0.43999   | 0.608984  | 0.344135  | 0.332164 | 1.27866   |
| TCONS_00224899    | XLOC_019162       | -            | lincRNA            | 585   | chr4 | 54540615  | 54648861  | - | 3 | 0       | 0.5722   | 0        | 2.00035   | 2.56463   | 1.70572   | 0.524107  | 0.480584 | 7.7995    |
| TCONS_00227308    | XLOC_019162       | -            | lincRNA            | 1100  | chr4 | 54561526  | 54648737  | - | 2 | 0.4138  | 0.24736  | 0.46964  | 0.458889  | 1.06699   | 1.11105   | 0.0988062 | 0.614938 | 2.11454   |
| TCONS_00223977    | XLOC_019162       | -            | lincRNA            | 8859  | chr4 | 54628785  | 54648739  | - | 2 | 0.74549 | 0.5321   | 0.70249  | 1.69663   | 0.991645  | 0.860852  | 0.375211  | 0.750092 | 1.25555   |
| TCONS_00224909    | XLOC_019172       | -            | anti-sense_lincRNA | 730   | chr4 | 56756389  | 56814216  | - | 4 | 0.38401 | 0.53756  | 0.70335  | 2.87464   | 0.394771  | 0.295389  | 0.67755   | 0.516024 | 1.4271    |
| TCONS_00218217    | XLOC_019172       | -            | lincRNA            | 1460  | chr4 | 56805080  | 56808100  | - | 2 | 0.56668 | 0.6743   | 0.15086  | 0.419801  | 0.616925  | 0.993376  | 0.601977  | 0.873082 | 0.596635  |
| TCONS_00220457    | XLOC_019175       | -            | lincRNA            | 402   | chr4 | 57391836  | 57396610  | - | 3 | 1.0007  | 3.22553  | 1.07691  | 0         | 0         | 0         | 0         | 0.414959 | 0.585806  |
| TCONS_00222224    | XLOC_019184       | -            | lincRNA            | 1701  | chr4 | 61639023  | 61660766  | - | 2 | 0.74772 | 0.47137  | 3.30302  | 0.213271  | 0.245971  | 0.375029  | 1.16879   | 0.536557 | 0.500485  |
| TCONS_00225715    | XLOC_019189       | -            | lincRNA            | 4994  | chr4 | 68204943  | 68242174  | - | 3 | 0.2255  | 0.11785  | 0.21316  | 0.496971  | 2.14246   | 1.05025   | 0.369975  | 0.58264  | 0.120234  |
| TCONS_00224912    | XLOC_019189       | -            | lincRNA            | 2589  | chr4 | 68238204  | 68242367  | - | 2 | 0.5305  | 0.05901  | 0.73809  | 1.84176   | 0.273903  | 0.746483  | 0.158664  | 0.1066   | 0         |
| TCONS_00229192    | XLOC_018631       | -            | anti-sense_lincRNA | 3127  | chr4 | 68618228  | 68622302  | + | 2 | 1.11623 | 0.86866  | 0.64229  | 0.502786  | 1.5738    | 2.73824   | 0.35821   | 1.42646  | 1.89188   |
| TCONS_00228605    | XLOC_018631       | -            | lincRNA            | 872   | chr4 | 68656136  | 68668590  | + | 4 | 1.21245 | 0.35027  | 0.02191  | 0.280097  | 0         | 0.95683   | 1.03693   | 0.181166 | 1.87486   |
| TCONS_00218939    | XLOC_018631       | -            | lincRNA            | 465   | chr4 | 68661271  | 68668082  | + | 3 | 0.00013 | 0        | 1.06683  | 0         | 0         | 1.39176   | 0.0465761 | 0        | 0.445756  |
| TCONS_00226112    | XLOC_018631       | -            | lincRNA            | 660   | chr4 | 68664324  | 68668555  | + | 2 | 0       | 0.57197  | 0.43882  | 0.0090222 | 1.75404   | 1.64046   | 0         | 0        | 0.0364777 |
| TCONS_00227658    | XLOC_018649       | -            | lincRNA            | 534   | chr4 | 71544394  | 71552589  | + | 4 | 0       | 0.21454  | 0.21344  | 0.768594  | 0.560098  | 2.19615   | 0.464647  | 2.57204  | 1.15008   |
| TCONS_00229953    | XLOC_018649       | -            | lincRNA            | 712   | chr4 | 71544650  | 71552589  | + | 3 | 0       | 7.72E-06 | 6.36E-06 | 0.2517    | 5.85E-06  | 0.91543   | 0.74503   | 1.84146  | 0.731927  |
| TCONS_00223704    | XLOC_018656       | -            | lincRNA            | 640   | chr4 | 74215510  | 74219596  | + | 2 | 0.23109 | 0.32445  | 0.80492  | 0.291901  | 0.423418  | 1.12415   | 0.271102  | 0.371674 | 0.53007   |
| TCONS_00222694    | XLOC_018668       | -            | intronic_lincRNA   | 1231  | chr4 | 75045690  | 75047739  | + | 2 | 1.78015 | 1.44352  | 1.62987  | 1.11842   | 1.3751    | 1.63928   | 1.19554   | 1.48843  | 1.23517   |
| TCONS_00224009    | XLOC_019223       | -            | lincRNA            | 568   | chr4 | 76028662  | 76047227  | - | 2 | 4.96877 | 1.16662  | 4.25144  | 1.39722   | 1.52266   | 3.07577   | 1.62965   | 2.90078  | 2.85912   |
| TCONS_00220501    | XLOC_019231       | -            | lincRNA            | 460   | chr4 | 76649084  | 76649642  | - | 2 | 2.72821 | 2.7688   | 3.03892  | 3.96345   | 2.16897   | 3.27444   | 5.61287   | 3.3024   | 3.8459    |
| TCONS_00231365    | XLOC_019241       | -            | lincRNA            | 4161  | chr4 | 77159608  | 77172806  | - | 3 | 0.67159 | 0.33138  | 0        | 0         | 0.739443  | 0.164445  | 0.286556  | 2.01E-05 | 1.18342   |
| TCONS_00222260    | XLOC_019241       | -            | lincRNA            | 3734  | chr4 | 77159970  | 77172812  | - | 2 | 3.40706 | 1.66379  | 4.33229  | 0.39814   | 0.0169463 | 0.750386  | 2.68982   | 1.16938  | 2.09203   |
| TCONS_00228885    | XLOC_019241       | -            | lincRNA            | 3701  | chr4 | 77159996  | 77172770  | - | 3 | 0.00107 | 0.54709  | 6.09E-05 | 0.0001394 | 0.72456   | 0.0001614 | 2.49704   | 0.997167 | 0.156195  |
| TCONS_00218305    | XLOC_019246       | -            | lincRNA            | 613   | chr4 | 77830087  | 77831628  | - | 2 | 1.72284 | 0.51891  | 0.17174  | 0.155536  | 0.451484  | 0         | 0.144678  | 0        | 0         |
| TCONS_00227075    | XLOC_018696       | -            | lincRNA            | 2191  | chr4 | 80506310  | 80519754  | + | 2 | 2.05053 | 0.67458  | 0.84052  | 1.0287    | 0.833681  | 1.30708   | 0.674201  | 1.17127  | 0.376968  |
| TCONS_00227078    | XLOC_018699       | -            | intronic_lincRNA   | 2007  | chr4 | 81302470  | 81304815  | + | 2 | 11.3519 | 2.77826  | 4.594    | 0.885598  | 1.83768   | 1.82965   | 1.90676   | 1.95899  | 2.52479   |
| ENST00000514050.1 | ENSG00000251331.2 | RP11-689K5.3 | lincRNA            | 472   | chr4 | 82523951  | 82965397  | - | 4 | 0       | 0.26443  | 2.37316  | 0.236715  | 1.61102   | 3.38938   | 3.12327   | 0.60925  | 0.432096  |
| TCONS_00222281    | XLOC_019267       | -            | lincRNA            | 1162  | chr4 | 84059774  | 84111030  | - | 2 | 2.50072 | 0.301463 | 2.33046  | 0.665999  | 0.705105  | 0.805371  | 2.19836   | 0.840125 | 2.21514   |
| TCONS_00218339    | XLOC_019267       | -            | lincRNA            | 700   | chr4 | 84110157  | 84111421  | - | 2 | 1.70978 | 0.156    | 0        | 0.128371  | 0.124008  | 0.14122   | 0         | 0        | 0.256185  |
| TCONS_00225762    | XLOC_019272       | -            | lincRNA            | 1659  | chr4 | 85501910  | 85503781  | - | 2 | 2.44749 | 1.26097  | 1.96262  | 0.35107   | 1.68719   | 1.54338   | 1.12254   | 1.71152  | 1.46562   |
| TCONS_00229226    | XLOC_018711       | -            | lincRNA            | 2071  | chr4 | 85574246  | 85584352  | + | 2 | 1.69097 | 0.79355  | 1.11835  | 0.205264  | 0.295771  | 0.263167  | 0.93616   | 0.773855 | 1.41969   |
| TCONS_00219619    | XLOC_019274       | -            | lincRNA            | 1508  | chr4 | 87373124  | 87515359  | - | 2 | 4.99122 | 5.35798  | 4.38144  | 0.783314  | 2.58887   | 2.63667   | 4.52095   | 2.7117   | 3.09425   |
| TCONS_00218383    | XLOC_019281       | -            | lincRNA            | 351   | chr4 | 88813346  | 88814070  | - | 2 | 5.99571 | 3.37981  | 1.9456   | 0.856147  | 1.68291   | 0         | 2.07734   | 0        | 1.97409   |
| TCONS_00218384    | XLOC_019284       | -            | lincRNA            | 397   | chr4 | 88921260  | 88924089  | - | 2 | 1.02578 | 1.10313  | 4.79004  | 1.63799   | 0         | 0         | 0.313202  | 0        | 2.70476   |
| TCONS_00222306    | XLOC_019287       | -            | intronic_lincRNA   | 1114  | chr4 | 89340126  | 89342060  | - | 3 | 0.78069 | 0.31048  | 1.45718  | 0.490733  | 0.337599  | 0.231215  | 1.02904   | 1.06164  | 0.697123  |
| TCONS_00224432    | XLOC_018727       | -            | anti-sense_lincRNA | 12708 | chr4 | 89851254  | 89879402  | + | 3 | 0.45737 | 0.28543  | 0.18328  | 0.348547  | 0.326866  | 0.333792  | 0.570074  | 2.24248  | 2.51166   |
| TCONS_00225464    | XLOC_018727       | -            | intronic_lincRNA   | 691   | chr4 | 89862653  | 89866835  | + | 2 | 0       | 0.20024  | 0        | 1.28526   | 0.16874   | 0.370316  | 2.68862   | 3.62456  | 5.76094   |
| TCONS_00220107    | XLOC_018729       | -            | lincRNA            | 788   | chr4 | 90602609  | 90612996  | + | 2 | 0.69255 | 0.48404  | 0.11985  | 0         | 0         | 1.4399    | 0.201438  | 0.276618 | 0.296536  |
| TCONS_00225788    | XLOC_019308       | -            | lincRNA            | 746   | chr4 | 100304624 | 100325981 | - | 3 | 0.93201 | 0.39124  | 0.51688  | 0.352554  | 0.907609  | 0.646329  | 0.977774  | 0.447398 | 0         |
| TCONS_00218452    | XLOC_019322       | -            | lincRNA            | 745   | chr4 | 105412763 | 105416148 | - | 2 | 3.36138 | 0.15328  | 0.98942  | 0.147155  | 0.454646  | 0         | 0.544227  | 0.448225 | 0.258555  |
| TCONS_00222337    | XLOC_019322       | -            | lincRNA            | 445   | chr4 | 105413063 | 105416072 | - | 3 | 0       | 0.83165  | 2.16148  | 0.460264  | 0         | 0         | 0.497792  | 2.07E-05 | 0.379179  |
| TCONS_00221952    | XLOC_018761       | -            | lincRNA            | 712   | chr4 | 105510682 | 105541619 | + | 3 | 0.39746 | 0.13917  | 1.37951  | 0         | 0.484278  | 0.137894  | 0.23206   | 0        | 0.227357  |
| ENST00000504082.1 | ENSG00000251259.1 | AC004069.2   | lincRNA            | 549   | chr4 | 106058437 | 106061776 | - | 2 | 0.29098 | 0.61556  | 0.48007  | 0.368425  | 0.357093  | 0.202779  | 0.344301  | 0.706843 | 0.83813   |
| TCONS_00227793    | XLOC_018779       | -            | lincRNA            | 2059  | chr4 | 109589943 | 109593595 | + | 2 | 1.53718 | 1.44524  | 1.1256   | 0.654203  | 2.38149   | 2.64868   | 1.35055   | 1.90392  | 1.95695   |
| TCONS_00218470    | XLOC_019338       | -            | lincRNA            | 1015  | chr4 | 110302626 | 110317414 | - | 2 | 2.12567 | 0.87079  | 0.77495  | 0.471841  | 0.681688  | 0.259391  | 0.57796   | 1.29143  | 0.426755  |
| TCONS_00231187    | XLOC_018799       | -            | anti-sense_lincRNA | 1102  | chr4 | 114794160 | 115040277 | + | 3 | 0.33    |          |          |           |           |           |           |          |           |

|                   |                   |               |                    |      |      |           |           |   |   |         |         |         |           |           |           |          |          |           |
|-------------------|-------------------|---------------|--------------------|------|------|-----------|-----------|---|---|---------|---------|---------|-----------|-----------|-----------|----------|----------|-----------|
| TCONS_00224080    | XLOC_019351       | -             | lincRNA            | 286  | chr4 | 118735026 | 118738832 | - | 3 | 1.13868 | 0       | 0       | 1.48693   | 0.741452  | 1.64605   | 0.749615 | 0        | 0.695085  |
| TCONS_00219113    | XLOC_018807       | -             | lincRNA            | 689  | chr4 | 119512890 | 119517594 | + | 2 | 1.24821 | 0.43736 | 0.72279 | 1.31269   | 1.01465   | 1.44414   | 0.851376 | 0.500562 | 1.19086   |
| TCONS_00217814    | XLOC_018815       | -             | lincRNA            | 624  | chr4 | 120298794 | 120324263 | + | 2 | 1.67837 | 0.6737  | 0       | 0         | 0.293075  | 0.16669   | 0.28163  | 0.193007 | 0.137584  |
| TCONS_00221570    | XLOC_019362       | -             | lincRNA            | 618  | chr4 | 120362195 | 120366943 | - | 4 | 1.94553 | 1.36699 | 2.37494 | 1.383     | 1.04069   | 0.338195  | 0.428689 | 1.37088  | 0.9771    |
| TCONS_00218519    | XLOC_019380       | -             | intronic_lincRNA   | 2810 | chr4 | 123802213 | 123807074 | - | 2 | 1.79931 | 0.89319 | 1.04082 | 0.539379  | 0.753222  | 0.781256  | 1.25041  | 0.800164 | 0.46422   |
| TCONS_00230036    | XLOC_018827       | -             | lincRNA            | 257  | chr4 | 124443193 | 124448380 | + | 3 | 1.6228  | 0       | 1.27519 | 1.0731    | 5.40825   | 0         | 2.22282  | 1.4782   | 3.03864   |
| TCONS_00221588    | XLOC_019383       | -             | lincRNA            | 2463 | chr4 | 125420093 | 125477693 | - | 5 | 1.12769 | 1.4052  | 0.76989 | 0.593874  | 0.407348  | 0.497207  | 0.566961 | 0.710281 | 0.484569  |
| TCONS_00230284    | XLOC_019383       | -             | lincRNA            | 449  | chr4 | 125458903 | 125464852 | - | 3 | 0.40681 | 1.15748 | 1.73339 | 0         | 0.503762  | 0.570087  | 0.978815 | 2.33667  | 0.472885  |
| TCONS_00219182    | XLOC_018838       | -             | anti-sense_lincRNA | 4112 | chr4 | 129209352 | 129214471 | + | 2 | 1.90606 | 1.22582 | 3.58312 | 1.34294   | 1.65934   | 1.89889   | 2.43009  | 1.83449  | 1.19606   |
| TCONS_00225530    | XLOC_018838       | -             | anti-sense_lincRNA | 5092 | chr4 | 129209886 | 129225824 | + | 3 | 3.38171 | 2.03515 | 1.8415  | 0.560711  | 1.73455   | 1.22569   | 1.50523  | 1.48429  | 1.12927   |
| ENST00000514265.1 | ENSG00000248187.1 | RP11-184M15.1 | lincRNA            | 1623 | chr4 | 129489127 | 129491686 | - | 2 | 0.35847 | 0.04973 | 0.24544 | 1.30487   | 0.302758  | 1.38468   | 0.57559  | 0.283081 | 0.0406173 |
| TCONS_00220620    | XLOC_019396       | -             | lincRNA            | 983  | chr4 | 134869395 | 134932197 | - | 5 | 1.56163 | 1.7226  | 1.34497 | 0.491171  | 0.473167  | 0.360036  | 0.451462 | 0.517248 | 0.518373  |
| TCONS_00220622    | XLOC_019406       | -             | lincRNA            | 396  | chr4 | 139823303 | 139831550 | - | 2 | 1.03094 | 1.84817 | 0       | 0         | 0         | 0         | 0.944681 | 0.428228 | 0.302102  |
| ENST00000608345.1 | ENSG00000273247.1 | RP11-83A24.2  | lincRNA            | 433  | chr4 | 140334956 | 140337300 | - | 2 | 4.34466 | 2.16779 | 0.92843 | 0.276636  | 0.80876   | 0.609641  | 0.524753 | 1.43054  | 2.02445   |
| TCONS_00222008    | XLOC_018848       | -             | intronic_lincRNA   | 569  | chr4 | 141187985 | 141190761 | + | 2 | 1.01303 | 0.58171 | 1.1564  | 0.92471   | 0.636071  | 0.191928  | 0        | 0        | 0.304134  |
| TCONS_00223803    | XLOC_018848       | -             | intronic_lincRNA   | 369  | chr4 | 141188279 | 141190761 | + | 3 | 0.19144 | 0       | 0       | 1.41106   | 0.0861991 | 0.422168  | 2.94828  | 1.00007  | 0.0281388 |
| ENST00000511213.1 | ENSG00000248810.1 | RP11-362F19.1 | lincRNA            | 719  | chr4 | 142244625 | 142253772 | - | 3 | 0.58818 | 0.68635 | 0.68029 | 1.73116   | 2.14953   | 1.90434   | 2.74627  | 1.09923  | 1.90618   |
| TCONS_00220220    | XLOC_018854       | -             | intronic_lincRNA   | 1990 | chr4 | 143486927 | 143506177 | + | 2 | 0.51312 | 0.75056 | 1.48099 | 0.500801  | 0.51533   | 0.314392  | 0.587286 | 0.898951 | 1.35508   |
| ENST00000507486.1 | ENSG00000250326.1 | RP11-284M14.1 | lincRNA            | 759  | chr4 | 144098813 | 144105982 | - | 2 | 2.73126 | 1.5282  | 3.15418 | 1.03298   | 1.99414   | 1.76744   | 2.75754  | 2.4753   | 3.22477   |
| TCONS_00220205    | XLOC_018858       | -             | lincRNA            | 360  | chr4 | 144481196 | 144493819 | + | 2 | 0       | 0.45506 | 4.12057 | 1.6156    | 3.17159   | 0.445642  | 1.17189  | 2.64766  | 0         |
| TCONS_00217871    | XLOC_018859       | -             | anti-sense_lincRNA | 1954 | chr4 | 144779021 | 144834187 | + | 4 | 1.15458 | 0.73022 | 1.08228 | 0.646495  | 0.614146  | 0.627228  | 0.439096 | 0.925207 | 0.551221  |
| TCONS_00223807    | XLOC_018859       | -             | lincRNA            | 1074 | chr4 | 144779948 | 144787771 | + | 3 | 0.9511  | 0.55904 | 0.94609 | 0.754131  | 0.598967  | 0.351437  | 0.391312 | 0.354701 | 0.149814  |
| TCONS_00227454    | XLOC_019441       | -             | intronic_lincRNA   | 2552 | chr4 | 146829497 | 146832807 | - | 2 | 2.47393 | 2.10295 | 2.81447 | 1.19719   | 2.40363   | 1.7341    | 2.18159  | 2.66486  | 2.18373   |
| TCONS_00219771    | XLOC_019447       | -             | lincRNA            | 819  | chr4 | 149742020 | 149756510 | - | 3 | 2.13844 | 4.25117 | 2.84405 | 0.31085   | 0.399792  | 0.455828  | 1.81592  | 0.525106 | 1.97086   |
| TCONS_00226860    | XLOC_019452       | -             | lincRNA            | 1638 | chr4 | 152326594 | 152330111 | - | 2 | 1.98654 | 1.37787 | 1.7486  | 0.712407  | 1.15555   | 1.12553   | 1.26111  | 0.616239 | 1.40672   |
| ENST00000515789.1 | ENSG00000248571.1 | RP11-768B22.2 | intronic_lincRNA   | 2371 | chr4 | 153587520 | 153591259 | + | 2 | 0.23509 | 0.35809 | 0.28895 | 2.85948   | 0.0566207 | 0.90703   | 0.214953 | 0.444306 | 1.11666   |
| TCONS_00220241    | XLOC_018891       | -             | lincRNA            | 1171 | chr4 | 154710717 | 154805614 | + | 2 | 0.41998 | 1.67924 | 0.36073 | 0.791777  | 0.190508  | 0.580281  | 1.27034  | 1.16517  | 0.775231  |
| TCONS_00227909    | XLOC_018891       | -             | lincRNA            | 2907 | chr4 | 154924938 | 154949807 | + | 2 | 0.53639 | 0.63195 | 0.42495 | 2.43845   | 2.13059   | 1.94022   | 0.979716 | 1.00626  | 0.734627  |
| TCONS_00223832    | XLOC_018891       | -             | anti-sense_lincRNA | 1680 | chr4 | 154925336 | 155193226 | + | 5 | 1.41984 | 1.04843 | 1.37192 | 6.83767   | 5.43838   | 4.56076   | 5.4903   | 2.80937  | 1.51556   |
| TCONS_00224645    | XLOC_018891       | -             | anti-sense_lincRNA | 1849 | chr4 | 154925336 | 155193424 | + | 6 | 0       | 0.72254 | 0.48653 | 14.0171   | 2.61147   | 4.88128   | 2.96305  | 0.309045 | 2.73108   |
| TCONS_00224644    | XLOC_018891       | -             | anti-sense_lincRNA | 4588 | chr4 | 154925336 | 155193424 | + | 5 | 0       | 0.40619 | 0.59696 | 4.21479   | 1.44596   | 1.58641   | 1.66897  | 0        | 1.423     |
| TCONS_00226358    | XLOC_018891       | -             | anti-sense_lincRNA | 1791 | chr4 | 154926175 | 155160454 | + | 5 | 1.30268 | 0.83883 | 0.72913 | 8.5011    | 5.86617   | 5.74744   | 3.37518  | 2.54566  | 2.46231   |
| TCONS_00223831    | XLOC_018891       | -             | lincRNA            | 5712 | chr4 | 154926192 | 155133143 | + | 5 | 2.23208 | 2.33506 | 2.46202 | 14.3907   | 11.9327   | 11.3959   | 10.3426  | 5.17446  | 3.89948   |
| TCONS_00227468    | XLOC_019466       | -             | lincRNA            | 1680 | chr4 | 156441933 | 156443858 | - | 2 | 1.79237 | 1.05178 | 0.70778 | 0.259562  | 1.12263   | 0.76072   | 1.30406  | 1.08844  | 1.09332   |
| TCONS_00221144    | XLOC_018908       | -             | anti-sense_lincRNA | 1595 | chr4 | 159094020 | 159123393 | + | 6 | 2.42076 | 2.11659 | 1.9639  | 1.25159   | 0.898892  | 0.830476  | 0.555031 | 0.805399 | 0.595241  |
| ENST00000508752.1 | ENSG00000248429.1 | RP11-597D13.9 | lincRNA            | 2724 | chr4 | 159097459 | 159122065 | + | 4 | 0.72273 | 0.50662 | 0.4287  | 0.266512  | 0.15692   | 0.307329  | 0.199555 | 0.297924 | 0.371158  |
| TCONS_00230616    | XLOC_018908       | -             | lincRNA            | 4691 | chr4 | 159117219 | 159122126 | + | 2 | 2.86602 | 1.49588 | 1.64567 | 1.27089   | 0.672189  | 1.57293   | 1.4393   | 1.1376   | 1.84061   |
| TCONS_00230089    | XLOC_018917       | -             | lincRNA            | 1744 | chr4 | 160618604 | 160768302 | + | 3 | 0.33042 | 0.36648 | 0.22609 | 1.02E-06  | 0.372912  | 1.39713   | 0.436093 | 0.878677 | 1.07436   |
| TCONS_00228750    | XLOC_018917       | -             | lincRNA            | 1013 | chr4 | 160618982 | 160650989 | + | 2 | 0       | 0.00014 | 0       | 0.0788321 | 0.732117  | 1.9365    | 1.55594  | 1.30976  | 3.65717   |
| TCONS_00222439    | XLOC_019482       | -             | intronic_lincRNA   | 3352 | chr4 | 164472242 | 164503920 | - | 2 | 1.00421 | 1.59071 | 4.10799 | 3.83649   | 3.62395   | 5.04065   | 2.43867  | 2.85244  | 6.1664    |
| TCONS_00227473    | XLOC_019488       | -             | lincRNA            | 1561 | chr4 | 169245300 | 169247645 | - | 2 | 0.82451 | 0.62406 | 0.46204 | 0.329336  | 0.226149  | 0.465391  | 0.172013 | 0.414492 | 0.934455  |
| TCONS_00230998    | XLOC_019497       | -             | intronic_lincRNA   | 1796 | chr4 | 173910283 | 173917131 | - | 2 | 1.91801 | 0.26593 | 0.61232 | 0.160449  | 0.231277  | 0.176335  | 1.13532  | 1.91684  | 1.30317   |
| TCONS_00222455    | XLOC_019498       | -             | lincRNA            | 4679 | chr4 | 174083509 | 174088532 | - | 2 | 2.0065  | 0.99278 | 1.56848 | 0.885506  | 2.39815   | 1.86733   | 0.779178 | 1.41463  | 1.42857   |
| TCONS_00226404    | XLOC_018937       | -             | intronic_lincRNA   | 634  | chr4 | 174144783 | 174145547 | + | 2 | 0.70281 | 0.1645  | 0.32651 | 1.18382   | 2.14675   | 1.13978   | 0.549913 | 1.13078  | 1.07499   |
| TCONS_00224163    | XLOC_019500       | -             | intronic_lincRNA   | 3455 | chr4 | 174201606 | 174211598 | - | 2 | 0.34507 | 0.21694 | 0.21385 | 1.49387   | 3.43358   | 2.00855   | 0.375643 | 0.567172 | 0.318921  |
| ENST00000608794.1 | ENSG00000272870.1 | RP11-798M19.6 | anti-sense_lincRNA | 587  | chr4 | 174285145 | 174290966 | - | 2 | 0.63899 | 4.43414 | 10.6454 | 2.98866   | 1.4468    | 2.19281   | 6.18835  | 3.1787   | 3.01858   |
| TCONS_00217976    | XLOC_018953       | -             | lincRNA            | 2135 | chr4 | 181069927 | 181159035 | + | 2 | 4.11413 | 0.54802 | 1.15327 | 0.0330781 | 0.0635466 | 0.0363501 | 0.452501 | 0.914389 | 0.35807   |
| TCONS_00222461    | XLOC_019515       | -             | lincRNA            | 495  | chr4 | 183006236 | 183009848 | - | 2 | 0       | 0.24344 | 0.48503 | 0         | 0         | 1.2011    | 0.819916 | 0.280124 | 0         |
| TCONS_00220701    | XLOC_019523       | -             | lincRNA            | 804  | chr4 | 184683133 | 184687017 | - | 2 | 1.68566 | 1.88441 | 1.74943 | 0.424792  | 0.512268  | 0.233598  | 1.37195  | 0.538351 | 0.0962027 |
| TCONS_00231468    | XLOC_019530       | -             | lincRNA            | 3627 | chr4 | 185280799 | 185284563 | - | 2 | 0.53633 | 0.5769  | 0.85298 | 0.634749  | 0.573356  | 2.19484   | 0.424671 | 1.56905  | 1.90147   |
| TCONS_00223557    | XLOC_019530       | -             | lincRNA            | 5177 | chr4 | 185294558 | 185305323 | - | 2 | 2.19571 | 2.15533 | 1.92826 | 2.17211   | 2.00995   | 4.57517   | 1.53057  | 3.62512  | 4.03011   |
| ENST00000605270.1 | ENSG00000271538.1 | RP11-326I11.4 | lincRNA            | 1059 | chr4 | 185427614 | 185458708 | - | 3 | 0.4746  | 0.41295 | 0.08165 | 0.820635  | 0.431025  | 0.410106  | 1.23285  | 0.753573 | 1.01188   |
| TCONS_00227226    | XLOC_018976       | -             | intronic_lincRNA   | 1004 | chr4 | 187124473 | 187125540 | + | 2 | 8.36522 | 2.82492 | 3.49186 | 3.58734   | 4.30006   | 3.68132   | 1.83121  | 1.81289  | 2.95633   |
| TCONS_00222476    | XLOC_019552       | -             | lincRNA            | 1749 | chr4 | 189354482 | 189361065 | - | 2 | 0.85632 | 0.41104 | 1.84794 | 0.0413309 | 0.873842  | 0.272541  | 1.17003  | 1.50751  | 0.932539  |
| TCONS_00222477    | XLOC_019554       | -             | lincRNA            | 270  | chr4 | 190018201 | 190045617 | - | 2 | 1.36721 | 0       | 0       | 0         | 0         | 0         | 0.918523 | 0        | 0         |
| TCONS_00225610    | XLOC_018987       | -             | lincRNA            | 329  | chr4 | 190802370 | 190802784 | + | 2 | 3.10631 | 1.70072 | 0       | 0         | 1.97733   | 0         | 1.96499  | 0        | 0         |
| TCONS_00237892    | XLOC_019567       | -             | anti-sense_lincRNA | 2174 | chr5 | 478745    | 481063    | + | 2 | 2.01647 | 2.2919  | 4.02699 | 2.85331   | 4.42241   | 3.84815   | 1.53749  | 1.58878  | 1.57939   |
| TCONS_00233173    | XLOC_020209       | -             | lincRNA            | 2058 | chr5 | 571075    | 580406    | - | 3 | 0.85147 | 0.65359 | 2.38637 | 0.673455  | 2.92613   | 1.58857   | 0.222507 | 0.106844 | 0.15124   |
| TCONS_00234506    | XLOC_020209       | -             | lincRNA            | 1303 | chr5 | 571907    | 580397    | - | 2 | 3.09709 | 1.20908 | 5.35657 | 2.407     |           |           |          |          |           |

|                   |                   |               |                    |       |      |           |           |   |   |         |         |         |           |           |          |           |           |           |         |
|-------------------|-------------------|---------------|--------------------|-------|------|-----------|-----------|---|---|---------|---------|---------|-----------|-----------|----------|-----------|-----------|-----------|---------|
| TCONS_00244566    | XLOC_020229       | -             | lincRNA            | 296   | chr5 | 1546901   | 1548539   | - | 2 | 2.05773 | 0       | 0       | 0         | 0         | 0        | 0         | 0         | 0         | 1.24848 |
| TCONS_00235118    | XLOC_019578       | -             | lincRNA            | 2185  | chr5 | 1931467   | 1936070   | + | 2 | 1.02836 | 1.31764 | 0.52692 | 0.128976  | 0.991062  | 0.283466 | 0.26462   | 0.32409   | 0.145427  |         |
| TCONS_00237088    | XLOC_019581       | -             | lincRNA            | 290   | chr5 | 2267021   | 2278422   | + | 2 | 0       | 0       | 2.48627 | 0         | 0         | 0        | 0         | 2.14733   | 0         | 0       |
| TCONS_00239562    | XLOC_020238       | -             | lincRNA            | 1183  | chr5 | 5390987   | 5422278   | - | 3 | 2.18753 | 0.54024 | 1.27539 | 0.749095  | 0.581056  | 1.1208   | 1.11936   | 1.18872   | 0.857023  |         |
| TCONS_00233192    | XLOC_020238       | -             | lincRNA            | 1895  | chr5 | 5419891   | 5422347   | - | 2 | 1.43939 | 1.14778 | 1.40394 | 0.434557  | 1.26048   | 0.761892 | 1.07764   | 1.63992   | 0.935434  |         |
| TCONS_00233196    | XLOC_020242       | -             | lincRNA            | 4380  | chr5 | 6356265   | 6363752   | - | 2 | 2.14995 | 0.40529 | 0.68235 | 0.27548   | 0.925173  | 0.723045 | 0.306194  | 0.652477  | 1.06197   |         |
| TCONS_00235130    | XLOC_019601       | -             | lincRNA            | 435   | chr5 | 6777117   | 6777726   | + | 2 | 0.86161 | 2.14894 | 0.92023 | 0         | 0.534478  | 0.3022   | 0         | 0         | 0.354473  | 0       |
| ENST00000416930.2 | ENSG00000246016.2 | RP11-1C1.7    | lincRNA            | 483   | chr5 | 10479483  | 10482421  | + | 2 | 7.16638 | 2.53955 | 3.54364 | 1.13727   | 1.32614   | 2.25448  | 3.63879   | 2.33916   | 3.1123    |         |
| TCONS_00235609    | XLOC_020272       | -             | lincRNA            | 230   | chr5 | 17145199  | 17147509  | - | 2 | 0       | 0       | 2.068   | 0         | 1.73801   | 0        | 1.81885   | 0         | 0         | 0       |
| TCONS_00241362    | XLOC_020273       | -             | lincRNA            | 215   | chr5 | 17827044  | 17828972  | - | 2 | 3.47207 | 0       | 14.5833 | 0         | 2.43715   | 0        | 20.6339   | 3.38666   | 0         | 0       |
| TCONS_00233235    | XLOC_020281       | -             | lincRNA            | 205   | chr5 | 30788879  | 30790766  | - | 2 | 8.90118 | 0       | 0       | 0         | 3.17569   | 0        | 0         | 0         | 0         | 2.95998 |
| TCONS_00239272    | XLOC_019639       | -             | lincRNA            | 475   | chr5 | 34588923  | 34590631  | + | 2 | 1.10598 | 1.30743 | 1.82501 | 0.468231  | 2.27584   | 1.03141  | 1.98495   | 1.80714   | 1.70915   |         |
| ENST00000606401.1 | ENSG00000272323.1 | CTD-2517O10.6 | anti-sense_lincRNA | 1565  | chr5 | 34837654  | 34839383  | - | 2 | 5.1568  | 3.37038 | 4.86272 | 1.31348   | 2.6156    | 1.64986  | 4.67349   | 2.65673   | 3.09157   |         |
| ENST00000508745.1 | ENSG00000250155.1 | CTD-2353F22.1 | lincRNA            | 589   | chr5 | 36702732  | 36725297  | - | 3 | 0.26122 | 0.73517 | 1.09545 | 2.80804   | 1.75909   | 5.45366  | 0.923328  | 0         | 6.00568   |         |
| TCONS_00233277    | XLOC_020309       | -             | anti-sense_lincRNA | 1873  | chr5 | 37065561  | 37069008  | - | 2 | 2.92775 | 1.47962 | 1.58511 | 0.803546  | 1.21328   | 1.3877   | 0.977908  | 0.962171  | 1.34658   |         |
| ENST00000514532.2 | ENSG00000248587.2 | GDNF-AS1      | lincRNA            | 2913  | chr5 | 37870009  | 37874996  | + | 3 | 0.67175 | 0.44262 | 0.61954 | 0.585703  | 2.03376   | 3.23252  | 0.380705  | 0.444047  | 0.399723  |         |
| ENST00000510986.2 | ENSG00000248587.2 | GDNF-AS1      | lincRNA            | 1941  | chr5 | 37873527  | 37875901  | + | 2 | 0.41906 | 0.52804 | 0.47555 | 0.373823  | 1.34873   | 2.63733  | 0.143403  | 0.554633  | 0.172593  |         |
| TCONS_00241060    | XLOC_019666       | -             | anti-sense_lincRNA | 362   | chr5 | 41015834  | 41020228  | + | 2 | 0       | 0       | 0       | 0         | 1.56569   | 0.880181 | 0.3855    | 0         | 0.367343  |         |
| ENST00000510349.1 | ENSG00000250360.1 | CTD-2089N3.1  | lincRNA            | 569   | chr5 | 50261521  | 50262842  | - | 2 | 0.2753  | 0.58171 | 0.57813 | 0         | 0         | 0        | 0         | 0         | 0         | 0       |
| TCONS_00239615    | XLOC_020358       | -             | lincRNA            | 276   | chr5 | 53961958  | 53999223  | - | 2 | 0       | 0       | 0       | 1.66791   | 0.834464  | 0        | 0.847987  | 0         | 0.782038  |         |
| TCONS_00235207    | XLOC_019695       | -             | lincRNA            | 3243  | chr5 | 54001807  | 54033179  | + | 2 | 0.46975 | 1.02115 | 1.83033 | 1.45082   | 0.222009  | 0.277238 | 0.784696  | 0.63319   | 2.25558   |         |
| TCONS_00241761    | XLOC_019701       | -             | anti-sense_lincRNA | 1294  | chr5 | 54575053  | 54591352  | + | 4 | 2.60997 | 2.00758 | 3.39034 | 0.64405   | 1.91508   | 1.28688  | 2.03738   | 1.5555    | 2.38025   |         |
| TCONS_00238041    | XLOC_019701       | -             | anti-sense_lincRNA | 1158  | chr5 | 54579184  | 54591352  | + | 2 | 0       | 0       | 0       | 0         | 0         | 0        | 0         | 0         | 0.246305  | 0       |
| TCONS_00242817    | XLOC_019712       | -             | anti-sense_lincRNA | 872   | chr5 | 56749006  | 56829260  | + | 4 | 0.90938 | 0.63456 | 0.7327  | 0.0954216 | 0.551989  | 1.67895  | 1.75799   | 0.724665  | 0.518322  |         |
| TCONS_00244333    | XLOC_019719       | -             | lincRNA            | 1378  | chr5 | 60475912  | 60478760  | + | 2 | 2.33762 | 0.90182 | 2.01868 | 0.978633  | 1.46412   | 1.0757   | 1.74134   | 1.30122   | 2.11151   |         |
| TCONS_00234687    | XLOC_020386       | -             | lincRNA            | 870   | chr5 | 60546334  | 60600673  | - | 3 | 7.6007  | 4.13708 | 4.82943 | 0.861365  | 0.830476  | 1.26299  | 2.20416   | 1.09029   | 2.7727    |         |
| ENST00000515184.1 | ENSG00000250978.1 | RP11-357D18.1 | lincRNA            | 685   | chr5 | 66760863  | 66771420  | - | 4 | 0.41949 | 0       | 0.29154 | 0.264712  | 1.79045   | 2.62101  | 1.5945    | 0.336514  | 0.12008   |         |
| ENST00000515199.1 | ENSG00000248359.1 | CTC-537E7.2   | lincRNA            | 340   | chr5 | 67827517  | 67829357  | - | 2 | 0.71725 | 0.52161 | 6.31665 | 0.461767  | 1.36397   | 1.52938  | 3.15219   | 1.827     | 0         |         |
| TCONS_00237635    | XLOC_020407       | -             | lincRNA            | 2289  | chr5 | 68324252  | 68339819  | - | 2 | 1.22152 | 0.84586 | 1.93555 | 0.459561  | 0.853314  | 1.58235  | 1.75959   | 0.808193  | 1.21588   |         |
| ENST00000502659.2 | ENSG00000250387.2 | RP11-136K7.2  | lincRNA            | 2767  | chr5 | 70647682  | 70742169  | - | 2 | 0.19885 | 0.02752 | 0       | 0         | 0.0478667 | 0.246524 | 0.0227046 | 0.0312929 | 0.179814  |         |
| TCONS_00241114    | XLOC_019754       | -             | lincRNA            | 1147  | chr5 | 70878694  | 70879921  | + | 2 | 0.75355 | 0.22461 | 0.36996 | 0.135314  | 1.30244   | 0.297514 | 0.496361  | 0.682851  | 0.244614  |         |
| TCONS_00247059    | XLOC_019758       | -             | anti-sense_lincRNA | 2034  | chr5 | 71852249  | 71884834  | + | 5 | 0.55871 | 0.93951 | 1.96732 | 0.0381165 | 0.0234466 | 0.490346 | 1.35557   | 0.317776  | 1.0134    |         |
| TCONS_00238141    | XLOC_019758       | -             | anti-sense_lincRNA | 2650  | chr5 | 71852449  | 71885574  | + | 5 | 1.17428 | 1.02723 | 1.12583 | 0.311029  | 1.04832   | 0.231128 | 1.21333   | 0.62706   | 0.1869    |         |
| TCONS_00237217    | XLOC_019758       | -             | anti-sense_lincRNA | 3543  | chr5 | 71865373  | 71886218  | + | 4 | 1.21498 | 0.14806 | 0.8887  | 0         | 0.137758  | 0.23473  | 0.216496  | 0.279309  | 0.549955  |         |
| TCONS_00246085    | XLOC_020426       | -             | lincRNA            | 519   | chr5 | 71986071  | 71989435  | - | 2 | 1.27264 | 0.89925 | 1.79009 | 0.201638  | 0         | 0        | 0.377931  | 0.775287  | 0.818327  |         |
| TCONS_00241429    | XLOC_020427       | -             | lincRNA            | 572   | chr5 | 72542146  | 72570744  | - | 2 | 1.36546 | 0.19232 | 0.38224 | 0.345531  | 1.67338   | 1.71139  | 0.161154  | 1.10338   | 0.471319  |         |
| TCONS_00234750    | XLOC_020452       | -             | anti-sense_lincRNA | 364   | chr5 | 78419096  | 78531806  | - | 2 | 4.91507 | 2.21848 | 2.67705 | 0.393999  | 1.9326    | 1.73869  | 1.522     | 0.51601   | 0.725492  |         |
| TCONS_00235721    | XLOC_020454       | -             | lincRNA            | 1317  | chr5 | 78839396  | 78843753  | - | 2 | 1.18687 | 0.76105 | 0.18792 | 0.22937   | 0.551602  | 0.189096 | 2.36247   | 1.08385   | 0.569798  |         |
| TCONS_00235723    | XLOC_020463       | -             | lincRNA            | 906   | chr5 | 80243593  | 80244832  | - | 2 | 0.86572 | 1.10691 | 0.49783 | 1.72546   | 0.262595  | 0.499311 | 1.00311   | 0.804182  | 0.164388  |         |
| TCONS_00235304    | XLOC_019805       | -             | lincRNA            | 510   | chr5 | 81153436  | 81188596  | + | 3 | 0.65466 | 2.08308 | 1.15222 | 0         | 0.604266  | 0.457003 | 1.94669   | 0.798479  | 0.189093  |         |
| TCONS_00234151    | XLOC_019814       | -             | lincRNA            | 4203  | chr5 | 83785113  | 83834229  | + | 2 | 2.16843 | 0.77593 | 1.94658 | 1.08674   | 0.843455  | 0.825272 | 0.581407  | 0.741518  | 0.374465  |         |
| TCONS_00235315    | XLOC_019821       | -             | lincRNA            | 10327 | chr5 | 87571244  | 87586031  | + | 3 | 13.2042 | 6.21271 | 11.5332 | 3.56187   | 9.64823   | 9.72012  | 8.17236   | 8.51186   | 8.94762   |         |
| TCONS_00233445    | XLOC_020489       | -             | lincRNA            | 531   | chr5 | 90538744  | 90541091  | - | 2 | 1.8402  | 0       | 0       | 0.388573  | 0.188424  | 0.641677 | 0.545582  | 0.497586  | 0.35379   |         |
| TCONS_00232773    | XLOC_019828       | -             | lincRNA            | 688   | chr5 | 90890829  | 90892319  | + | 2 | 2.50152 | 0.29218 | 1.73832 | 0.526158  | 0.635468  | 0.434135 | 0.243761  | 1.00322   | 0.715999  |         |
| TCONS_00242886    | XLOC_019828       | -             | lincRNA            | 2288  | chr5 | 90986371  | 91019842  | + | 5 | 1.66805 | 0.64316 | 2.85922 | 0.441776  | 1.25736   | 1.35774  | 2.79645   | 0.616062  | 0.584106  |         |
| TCONS_00239369    | XLOC_019828       | -             | lincRNA            | 717   | chr5 | 90986650  | 91017705  | + | 4 | 2.21647 | 0.27561 | 1.10192 | 0.506196  | 0.274429  | 0.165601 | 1.26187   | 1.26121   | 0.998675  |         |
| TCONS_00232774    | XLOC_019828       | -             | lincRNA            | 391   | chr5 | 91017155  | 91018390  | + | 2 | 0.85443 | 0       | 0.87366 | 0.172216  | 0         | 0.178211 | 1.9225    | 0         | 0.0002308 |         |
| TCONS_00242887    | XLOC_019830       | -             | lincRNA            | 279   | chr5 | 91090811  | 91124334  | + | 3 | 0       | 0.91874 | 1.88482 | 0.804782  | 0         | 0.891369 | 1.63236   | 0         | 2.26193   |         |
| TCONS_00233452    | XLOC_020497       | -             | intronic_lincRNA   | 13060 | chr5 | 93639080  | 93653662  | - | 2 | 9.07189 | 3.87727 | 6.86576 | 2.18813   | 3.30009   | 2.79717  | 4.21706   | 4.06706   | 4.03994   |         |
| TCONS_00237296    | XLOC_019837       | -             | intronic_lincRNA   | 288   | chr5 | 94492213  | 94510377  | + | 2 | 0       | 1.65822 | 1.69507 | 2.18254   | 0.725173  | 1.61055  | 0         | 0         | 1.35961   |         |
| TCONS_00237687    | XLOC_020501       | -             | intronic_lincRNA   | 571   | chr5 | 95006327  | 95010696  | - | 2 | 0.82147 | 0.77137 | 2.10812 | 1.0394    | 0.503387  | 1.14402  | 0.484809  | 0.663858  | 0.787682  |         |
| TCONS_00240671    | XLOC_020503       | -             | lincRNA            | 1658  | chr5 | 95168161  | 95170184  | - | 2 | 0.2799  | 0.48532 | 0.62272 | 2.547     | 0.675342  | 0.772219 | 0.441302  | 0.497235  | 0.55494   |         |
| TCONS_00235334    | XLOC_019844       | -             | lincRNA            | 1987  | chr5 | 95411891  | 95716858  | + | 4 | 1.99879 | 0.94967 | 2.14716 | 0.895512  | 1.78948   | 2.59809  | 2.12434   | 2.56634   | 1.35736   |         |
| TCONS_00244410    | XLOC_019854       | -             | lincRNA            | 343   | chr5 | 98307681  | 98323260  | + | 3 | 0.70258 | 0       | 0.51486 | 0         | 1.33466   | 0        | 3.08184   | 0         | 0.834928  |         |
| TCONS_00232795    | XLOC_019856       | -             | lincRNA            | 359   | chr5 | 98382341  | 98394616  | + | 2 | 3.80003 | 0.45799 | 0.46085 | 0         | 0.39901   | 0.44847  | 0         | 0.53302   | 0.748914  |         |
| TCONS_00237301    | XLOC_019859       | -             | lincRNA            | 4643  | chr5 | 100239103 | 100278041 | + | 2 | 0.85047 | 0.82608 | 2.09785 | 1.10866   | 1.2986    | 1.01242  | 1.283     | 2.5273    | 1.24554   |         |
| TCONS_00240695    | XLOC_020534       | -             | intronic_lincRNA   | 6294  | chr5 | 107631660 | 107640091 | - | 2 | 4.99466 | 2.99881 | 4.74575 | 3.69465   | 3.48375   | 3.90918  | 3.71025   | 4.5118    | 3.91485   |         |
| TCONS_00235344    | XLOC_019865       | -             | lincRNA            | 237   | chr5 | 107806114 | 107821517 | + | 2 | 2.22423 | 1.71126 | 0       | 0         | 0         | 0        | 0         | 0         | 2.08594   | 0       |
| TCONS_00236817    | XLOC_020536       | -             | lincRNA            | 2164  | chr5 | 108656283 | 108659204 | - | 2 | 4.05345 | 2.69953 | 1.95278 | 0.847318  | 1.90947   | 2.29201  | 2.82326   | 1.88354   | 3.58647   |         |
| TCONS_00241483    | XLOC_020539       | -             | lincRNA            | 636   | chr5 | 110350270 | 110402571 | - | 3 | 0.9328  | 0.      |         |           |           |          |           |           |           |         |

|                   |                   |               |                    |      |      |           |           |   |   |         |          |         |           |           |           |          |           |          |
|-------------------|-------------------|---------------|--------------------|------|------|-----------|-----------|---|---|---------|----------|---------|-----------|-----------|-----------|----------|-----------|----------|
| ENST00000504004.1 | ENSG00000251076.1 | RP11-526F3.1  | anti-sense_lincRNA | 711  | chr5 | 111563980 | 111593006 | + | 4 | 4.38056 | 6.13541  | 5.9437  | 1.75836   | 3.15403   | 0.82899   | 4.53423  | 4.3075    | 1.13903  |
| TCONS_00232836    | XLOC_019891       | -             | lincRNA            | 708  | chr5 | 115952819 | 115964212 | + | 2 | 1.6023  | 0.98192  | 1.25151 | 0.758049  | 0.488134  | 0.55594   | 0.935726 | 0.320994  | 0.229167 |
| TCONS_00239402    | XLOC_019892       | -             | lincRNA            | 287  | chr5 | 116142598 | 116143833 | + | 2 | 2.25346 | 0        | 0       | 0.7354    | 1.46636   | 0         | 2.22267  | 0         | 0        |
| TCONS_00232837    | XLOC_019894       | -             | lincRNA            | 7090 | chr5 | 117260727 | 117338292 | + | 2 | 3.97306 | 0.94205  | 3.01643 | 3.27697   | 2.1994    | 1.6828    | 1.79646  | 2.36134   | 1.36314  |
| TCONS_00243165    | XLOC_020559       | -             | intronic_lincRNA   | 5725 | chr5 | 121650289 | 121659331 | - | 4 | 0.65501 | 0.56653  | 0.58072 | 0.0562637 | 0.293291  | 0.0294473 | 0.30137  | 0.440092  | 0.458016 |
| TCONS_00233526    | XLOC_020559       | -             | intronic_lincRNA   | 4976 | chr5 | 121652494 | 121659117 | - | 3 | 20.6262 | 5.6692   | 18.0403 | 1.38145   | 2.19221   | 2.95318   | 7.09121  | 5.51873   | 5.62513  |
| TCONS_00234886    | XLOC_020563       | -             | lincRNA            | 1738 | chr5 | 123467515 | 123473764 | - | 3 | 1.43036 | 0.58246  | 1.92006 | 0.166508  | 0.0415286 | 0.430454  | 0.553095 | 0.375961  | 0.209555 |
| TCONS_00233531    | XLOC_020563       | -             | lincRNA            | 1364 | chr5 | 123469212 | 123473201 | - | 3 | 1.76527 | 1.17665  | 1.12174 | 0.16507   | 0.333674  | 0.256627  | 0.786155 | 0.264735  | 0.517964 |
| TCONS_00244720    | XLOC_020563       | -             | lincRNA            | 642  | chr5 | 123470735 | 123739317 | - | 4 | 1.55792 | 0        | 1.53109 | 0         | 0.732528  | 0.375333  | 1.80394  | 0.249176  | 0        |
| TCONS_00233532    | XLOC_020563       | -             | lincRNA            | 695  | chr5 | 123721410 | 123739050 | - | 2 | 1.06875 | 0.30322  | 0.75565 | 0.16828   | 0         | 0         | 0.51584  | 0.642817  | 1.21992  |
| TCONS_00235789    | XLOC_020563       | -             | lincRNA            | 302  | chr5 | 123733233 | 123739072 | - | 2 | 3.22709 | 2.79477  | 4.52085 | 2.3376    | 2.15798   | 0         | 3.88421  | 0.636072  | 0.369654 |
| TCONS_00244431    | XLOC_019911       | -             | lincRNA            | 609  | chr5 | 123738249 | 123745875 | + | 3 | 0       | 8.30E-05 | 0.08451 | 0         | 0         | 0.0786437 | 1.37323  | 0.0935438 | 0        |
| TCONS_00237329    | XLOC_019911       | -             | lincRNA            | 942  | chr5 | 123738913 | 123745875 | + | 3 | 0       | 0.38273  | 1.07033 | 0.172793  | 0.501488  | 0         | 1.39891  | 0.977012  | 0        |
| TCONS_00232862    | XLOC_019911       | -             | lincRNA            | 607  | chr5 | 123743736 | 123745713 | + | 2 | 2.24755 | 0.00011  | 0.90785 | 0         | 0.454606  | 0.0946684 | 0        | 0.118545  | 0.286821 |
| TCONS_00245230    | XLOC_019931       | -             | lincRNA            | 1702 | chr5 | 130358431 | 130446503 | + | 4 | 5.63812 | 1.08342  | 3.71922 | 0.0852517 | 1.47484   | 1.17118   | 2.53069  | 1.55497   | 1.38503  |
| TCONS_00232891    | XLOC_019932       | -             | lincRNA            | 1359 | chr5 | 130588730 | 130592900 | + | 3 | 1.40793 | 1.40557  | 4.16441 | 1.32627   | 1.38194   | 2.18674   | 1.71961  | 2.92391   | 3.6437   |
| TCONS_00243173    | XLOC_020579       | -             | lincRNA            | 935  | chr5 | 130752292 | 130753453 | - | 2 | 1.3861  | 1.35279  | 1.14709 | 0.436108  | 1.26077   | 1.53453   | 0.882634 | 0.441169  | 1.34174  |
| TCONS_00241516    | XLOC_020602       | -             | lincRNA            | 384  | chr5 | 133441188 | 133443077 | - | 2 | 0       | 0.39435  | 0       | 0         | 2.0606    | 0.386971  | 0        | 0         | 0        |
| TCONS_00235399    | XLOC_019947       | -             | lincRNA            | 773  | chr5 | 133747662 | 133756145 | + | 2 | 1.24356 | 0.62104  | 0.49215 | 0.111962  | 1.08052   | 0.246294  | 0.723886 | 0.993927  | 0.202916 |
| TCONS_00232919    | XLOC_019956       | -             | lincRNA            | 1136 | chr5 | 134540798 | 134551434 | + | 2 | 3.04954 | 1.06059  | 1.12304 | 0.136907  | 0.922486  | 0.30102   | 0.313919 | 0.431848  | 1.17565  |
| TCONS_00233597    | XLOC_020614       | -             | intronic_lincRNA   | 845  | chr5 | 137021898 | 137024066 | - | 2 | 1.26309 | 0.55113  | 0.54557 | 0.298283  | 1.53413   | 0.328034  | 0.366595 | 0.503629  | 0.180069 |
| TCONS_00239441    | XLOC_019960       | -             | anti-sense_lincRNA | 464  | chr5 | 137031488 | 137039604 | + | 3 | 0       | 0        | 0       | 3.90299   | 2.37268   | 0.80609   | 0.230163 | 0         | 0        |
| TCONS_00233598    | XLOC_020613       | -             | lincRNA            | 2069 | chr5 | 137148503 | 137194975 | - | 3 | 4.93106 | 1.47051  | 2.55356 | 0.93343   | 2.48083   | 2.95944   | 1.04671  | 1.4257    | 1.67761  |
| TCONS_00245649    | XLOC_020613       | -             | anti-sense_lincRNA | 2500 | chr5 | 137149261 | 137225060 | - | 4 | 1.1492  | 1.13426  | 1.47144 | 0.240014  | 1.54942   | 0.876334  | 1.38164  | 1.14797   | 1.30745  |
| ENST00000514616.1 | ENSG00000250159.2 | RP11-381K20.2 | anti-sense_lincRNA | 827  | chr5 | 137150022 | 137225006 | - | 5 | 0.4554  | 1.2712   | 1.23616 | 1.2396    | 1.34194   | 1.31668   | 0        | 0.520714  | 0.333154 |
| ENST00000520838.1 | ENSG00000253404.1 | AC034243.1    | lincRNA            | 587  | chr5 | 138080123 | 138088998 | - | 2 | 0       | 0.92378  | 0.91771 | 0.166036  | 0.160756  | 0.365469  | 0.464126 | 0.211913  | 0.150929 |
| ENST00000606674.1 | ENSG00000272070.1 | AC005618.6    | lincRNA            | 544  | chr5 | 140705807 | 140707482 | + | 2 | 1.77109 | 0.62465  | 1.0354  | 0.560713  | 0.724739  | 0.822995  | 1.39794  | 1.4348    | 0.340204 |
| TCONS_00244471    | XLOC_020004       | -             | intronic_lincRNA   | 552  | chr5 | 140896578 | 140897457 | + | 2 | 0.57703 | 0.61024  | 0       | 0.182634  | 0.531     | 0.201038  | 1.36505  | 0         | 0        |
| TCONS_00237394    | XLOC_020011       | -             | lincRNA            | 223  | chr5 | 141783824 | 141845366 | + | 3 | 0       | 0        | 2.40848 | 0         | 4.03775   | 0         | 0        | 0         | 0        |
| TCONS_00244487    | XLOC_020032       | -             | lincRNA            | 4927 | chr5 | 148213914 | 148245383 | + | 2 | 3.21921 | 2.583    | 2.83966 | 3.19373   | 3.4667    | 3.58322   | 2.37452  | 4.90301   | 5.10928  |
| TCONS_00234401    | XLOC_020032       | -             | lincRNA            | 2416 | chr5 | 148257831 | 148261443 | + | 2 | 2.2571  | 1.24373  | 2.23305 | 0.750881  | 1.44217   | 1.39635   | 1.18442  | 2.32131   | 3.20365  |
| ENST00000499521.2 | ENSG00000230551.3 | CTB-89H12.4   | intronic_lincRNA   | 8636 | chr5 | 148873877 | 148884233 | - | 2 | 23.8204 | 14.7907  | 22.8799 | 23.1185   | 23.3791   | 32.6431   | 19.287   | 19.9492   | 23.4806  |
| TCONS_00235875    | XLOC_020687       | -             | intronic_lincRNA   | 491  | chr5 | 150002059 | 150002922 | - | 2 | 0.34854 | 1.72792  | 0       | 0.221163  | 0         | 0         | 0.208084 | 1.13639   | 0        |
| TCONS_00233025    | XLOC_020061       | -             | lincRNA            | 486  | chr5 | 151326116 | 151327356 | + | 2 | 2.12754 | 0.75372  | 0.50076 | 0.450107  | 0.218659  | 0.743541  | 1.27023  | 0.578455  | 0.205268 |
| TCONS_00237428    | XLOC_020067       | -             | lincRNA            | 612  | chr5 | 153476366 | 153514757 | + | 3 | 0.77575 | 0.21065  | 1.72132 | 0.413171  | 0.691387  | 0.540574  | 0.645723 | 1.39124   | 0.881327 |
| TCONS_00235487    | XLOC_020067       | -             | lincRNA            | 338  | chr5 | 153476594 | 153501377 | + | 2 | 0.6224  | 0.9449   | 0.00095 | 0.163974  | 1.5767    | 1.47373   | 2.0796   | 0.0002205 | 0.769763 |
| TCONS_00237440    | XLOC_020076       | -             | lincRNA            | 2373 | chr5 | 157084502 | 157087391 | + | 2 | 0.70461 | 0.71551  | 0.96229 | 1.5315    | 0.87681   | 0.550189  | 1.3959   | 0.850799  | 1.38126  |
| TCONS_00237441    | XLOC_020080       | -             | lincRNA            | 437  | chr5 | 158527585 | 158539058 | + | 2 | 0       | 1.07413  | 1.68418 | 3.419     | 1.397     | 0.815709  | 2.49297  | 0         | 0.994752 |
| ENST00000523301.1 | ENSG00000245812.2 | RP11-175K6.1  | lincRNA            | 568  | chr5 | 158527630 | 158534225 | + | 2 | 0.82813 | 0.86927  | 0.47559 | 0.598549  | 0.799726  | 1.39901   | 1.19404  | 1.33882   | 0        |
| TCONS_00233046    | XLOC_020082       | -             | lincRNA            | 504  | chr5 | 158737882 | 158738578 | + | 2 | 1.00124 | 1.18051  | 1.17562 | 0.423295  | 0.410943  | 0.233049  | 2.38399  | 2.44418   | 0.964467 |
| ENST00000517927.1 | ENSG00000253522.2 | MIR146A       | lincRNA            | 2301 | chr5 | 159895275 | 159914433 | + | 2 | 1.70037 | 1.64839  | 1.19449 | 2.13236   | 1.69685   | 0.836863  | 1.52732  | 5.01266   | 6.48418  |
| TCONS_00239809    | XLOC_020740       | -             | lincRNA            | 366  | chr5 | 161961981 | 161966112 | - | 2 | 0       | 0        | 0       | 1.16768   | 0         | 0         | 0        | 0.5095    | 0.358261 |
| TCONS_00233756    | XLOC_020742       | -             | lincRNA            | 378  | chr5 | 162050351 | 162051221 | - | 2 | 1.13366 | 0.40798  | 0       | 2.17697   | 1.42131   | 2.00078   | 1.04629  | 0.473599  | 0.333491 |
| TCONS_00241593    | XLOC_020747       | -             | lincRNA            | 2844 | chr5 | 164757250 | 164788631 | - | 4 | 0.38613 | 0.10687  | 0.42149 | 0.0726052 | 2.04033   | 0.797792  | 2.02552  | 1.45816   | 1.91117  |
| TCONS_00241592    | XLOC_020747       | -             | lincRNA            | 3066 | chr5 | 164758039 | 164763511 | - | 2 | 0.39187 | 0.07393  | 0.24297 | 0.0446517 | 1.33275   | 0.539689  | 1.60777  | 0.952599  | 1.3569   |
| TCONS_00237464    | XLOC_020121       | -             | lincRNA            | 292  | chr5 | 171010170 | 171010931 | + | 2 | 0       | 0.79415  | 3.24289 | 0.697385  | 0         | 0.771693  | 0        | 1.87774   | 0        |
| TCONS_00235047    | XLOC_020763       | -             | lincRNA            | 1254 | chr5 | 171268203 | 171269548 | - | 2 | 1.06418 | 0.80677  | 0.59775 | 0.911643  | 0.701701  | 0.734899  | 0.334042 | 0.689525  | 0.933511 |
| TCONS_00246975    | XLOC_020777       | -             | lincRNA            | 1222 | chr5 | 173135898 | 173137210 | - | 2 | 0.2993  | 0.34674  | 0.06851 | 1.56707   | 0.241265  | 1.92937   | 0.287188 | 1.89684   | 2.03908  |
| TCONS_00241604    | XLOC_020777       | -             | lincRNA            | 781  | chr5 | 173141775 | 173146455 | - | 2 | 0.35043 | 0.85738  | 0.12132 | 0.993741  | 0.213099  | 0.850106  | 0        | 2.80005   | 0.800382 |
| TCONS_00233089    | XLOC_020133       | -             | lincRNA            | 2857 | chr5 | 173184508 | 173200562 | + | 2 | 3.15077 | 2.63207  | 3.3816  | 0.216749  | 1.04044   | 0.582182  | 1.25013  | 0.513897  | 0.759985 |
| TCONS_00235922    | XLOC_020779       | -             | lincRNA            | 370  | chr5 | 173297393 | 173300114 | - | 2 | 1.18614 | 2.1383   | 0       | 0         | 0         | 0         | 1.46492  | 0         | 0        |
| TCONS_00234486    | XLOC_020171       | -             | lincRNA            | 453  | chr5 | 177384293 | 177386801 | + | 2 | 2.80302 | 0.2847   | 1.42087 | 1.5277    | 0.743434  | 0.84148   | 0        | 0.328341  | 0.232624 |
| TCONS_00233155    | XLOC_020188       | -             | lincRNA            | 1192 | chr5 | 179285965 | 179287973 | + | 2 | 2.98054 | 2.21514  | 1.27089 | 0.516656  | 1.18086   | 0.780951  | 1.4207   | 1.38461   | 1.40073  |
| TCONS_00259896    | XLOC_021530       | -             | lincRNA            | 394  | chr6 | 1552353   | 1555393   | - | 2 | 2.08287 | 0        | 2.24642 | 0.332702  | 1.95162   | 1.83407   | 0.318332 | 0.43284   | 1.22119  |
| TCONS_00257760    | XLOC_020870       | -             | intronic_lincRNA   | 7382 | chr6 | 5466149   | 5475215   | + | 2 | 2.6169  | 1.4047   | 2.24523 | 1.57631   | 1.93907   | 2.08398   | 1.21359  | 1.50642   | 2.2062   |
| TCONS_00253534    | XLOC_020879       | -             | lincRNA            | 202  | chr6 | 7673008   | 7674672   | + | 2 | 0       | 0        | 0       | 0         | 0         | 3.72597   | 3.70254  | 0         | 0        |
| TCONS_00255817    | XLOC_020883       | -             | lincRNA            | 603  | chr6 | 8790296   | 8792408   | + | 2 | 0.50439 | 0        | 0.88046 | 0.47824   | 0.617129  | 0.350865  | 0.593513 | 1.42311   | 1.01397  |
| TCONS_00249239    | XLOC_021575       | -             | lincRNA            | 5196 | chr6 | 9462869   | 9468495   | - | 2 | 5.29464 | 1.07356  | 2.39418 | 0.230469  | 0.257964  | 0.267276  | 0.872939 | 0.208653  | 0.219197 |
| TCONS_00259561    | XLOC_020886       | -             | lincRNA            | 1059 | chr6 | 10141533  | 10143930  | + | 3 | 0.7119  | 0.24777  | 0.24495 | 0.373016  | 1.29308   | 0.574149  | 1.23285  | 1.78973   | 1.55155  |
| TCONS_00261538    | XLOC_021585       | -             | lincRNA            | 587  | chr6 | 10508989  | 10510614  | - | 2 | 0.26257 | 0.36951  | 0.73416 | 0         | 0.482267  | 0.913672  | 1.08296  | 0.63574   | 1.0565   |
| TCONS_00255824    | XLOC_020897       | -             | intronic_lincRNA   | 5093 |      |           |           |   |   |         |          |         |           |           |           |          |           |          |



|                   |                   |                |                    |      |      |          |          |   |   |         |         |          |           |           |          |          |          |          |
|-------------------|-------------------|----------------|--------------------|------|------|----------|----------|---|---|---------|---------|----------|-----------|-----------|----------|----------|----------|----------|
| TCONS_00257778    | XLOC_020900       | -              | lincRNA            | 278  | chr6 | 11993141 | 11995180 | + | 2 | 1.24341 | 0       | 0        | 0         | 0.814231  | 1.80396  | 0        | 3.31598  | 0.763127 |
| TCONS_00248440    | XLOC_020911       | -              | lincRNA            | 5134 | chr6 | 14431351 | 14513019 | + | 4 | 2.22042 | 1.49335 | 1.48937  | 0.32589   | 0.559262  | 0.57017  | 1.03365  | 0.58214  | 0.502171 |
| TCONS_00262801    | XLOC_020911       | -              | lincRNA            | 1629 | chr6 | 14431587 | 14458115 | + | 2 | 1.79922 | 0.67843 | 1.47337  | 0.164551  | 0.274603  | 0.280006 | 0.515299 | 0.588873 | 0.804791 |
| TCONS_00254495    | XLOC_020911       | -              | lincRNA            | 1180 | chr6 | 14431749 | 14509567 | + | 3 | 2.61319 | 1.98796 | 1.92435  | 4.41E-05  | 1.24037   | 1.05134  | 1.32329  | 0.364001 | 0.328698 |
| TCONS_00254496    | XLOC_020911       | -              | lincRNA            | 2747 | chr6 | 14510262 | 14513790 | + | 2 | 1.17881 | 0.89906 | 0.71842  | 0.105276  | 0.167584  | 0.100939 | 0.746697 | 0.199369 | 0.239028 |
| ENST00000450930.1 | ENSG00000229931.1 | RP1-151F17.1   | lincRNA            | 635  | chr6 | 16762143 | 16762849 | + | 2 | 1.86987 | 0.65645 | 1.14011  | 1.47636   | 1.28505   | 0.649797 | 0.822919 | 2.06822  | 2.68121  |
| TCONS_00254051    | XLOC_021614       | -              | lincRNA            | 356  | chr6 | 19151892 | 19193874 | - | 2 | 0.64528 | 0.93401 | 2.35059  | 0         | 0         | 0.914341 | 1.20391  | 0.543763 | 0.381847 |
| TCONS_00250747    | XLOC_021616       | -              | lincRNA            | 2589 | chr6 | 19533302 | 19559835 | - | 4 | 1.82451 | 1.41756 | 1.19581  | 0.292265  | 0.526865  | 0.234704 | 0.391573 | 0.633705 | 0.960909 |
| TCONS_00249272    | XLOC_021616       | -              | lincRNA            | 3781 | chr6 | 19533394 | 19540820 | - | 3 | 1.94766 | 0.21827 | 0.38865  | 0.0909249 | 0.128867  | 0.353851 | 0.584409 | 0.518959 | 0.63153  |
| TCONS_00258535    | XLOC_020926       | -              | intronic_lincRNA   | 1991 | chr6 | 20764757 | 20767067 | + | 2 | 2.73509 | 1.22391 | 2.06443  | 1.78702   | 1.47645   | 2.00313  | 0.847825 | 0.673835 | 1.70902  |
| TCONS_00254507    | XLOC_020925       | -              | intronic_lincRNA   | 3423 | chr6 | 20790478 | 20797973 | + | 2 | 2.50278 | 1.70896 | 2.0518   | 1.60797   | 1.3909    | 2.05032  | 1.13816  | 1.59393  | 2.09361  |
| TCONS_00259582    | XLOC_020927       | -              | intronic_lincRNA   | 908  | chr6 | 21082116 | 21083100 | + | 2 | 0.57552 | 0.70239 | 2.1842   | 1.53946   | 0.785542  | 1.79242  | 0.416762 | 1.48921  | 1.6392   |
| ENST00000606723.2 | ENSG00000272462.2 | U91328.19      | lincRNA            | 4130 | chr6 | 25992890 | 26002003 | + | 2 | 1.71498 | 1.32924 | 1.52253  | 1.15577   | 1.82764   | 1.64545  | 0.858748 | 1.53106  | 0.748191 |
| ENST00000424968.1 | ENSG00000224843.2 | LINC00240      | lincRNA            | 507  | chr6 | 26988232 | 26991703 | + | 3 | 2.64406 | 0.27366 | 2.17009  | 0.838268  | 0.696998  | 1.54878  | 1.76983  | 1.51435  | 0.219259 |
| ENST00000420081.1 | ENSG00000224843.2 | LINC00240      | lincRNA            | 309  | chr6 | 26988415 | 26991703 | + | 3 | 0       | 0.43573 | 3.54094  | 0         | 1.63678   | 0.661442 | 1.36128  | 0.838833 | 2.94467  |
| TCONS_00256244    | XLOC_021648       | -              | lincRNA            | 287  | chr6 | 27374722 | 27375543 | - | 2 | 1.12673 | 0.83824 | 1.71442  | 0         | 0.73318   | 2.44211  | 0        | 0        | 0        |
| ENST00000444986.1 | ENSG00000224157.1 | HCG14          | lincRNA            | 413  | chr6 | 28864307 | 28865099 | + | 2 | 0.94962 | 1.69728 | 3.39702  | 0         | 1.18217   | 1.66878  | 4.32585  | 1.17792  | 0.554819 |
| TCONS_00252976    | XLOC_021662       | -              | lincRNA            | 808  | chr6 | 29459054 | 29462335 | - | 2 | 0.83731 | 1.63792 | 0.34755  | 0.316491  | 0.508866  | 0.696165 | 1.26541  | 0.401066 | 0.095564 |
| TCONS_00253600    | XLOC_020978       | -              | lincRNA            | 822  | chr6 | 29465286 | 29475679 | + | 3 | 0.81852 | 0.97277 | 0.79244  | 1.13427   | 0.397846  | 0.22681  | 1.33147  | 0.522535 | 0.560362 |
| ENST00000434086.1 | ENSG00000214922.5 | HLA-F-AS1      | lincRNA            | 553  | chr6 | 29705536 | 29706221 | - | 2 | 1.72621 | 3.65088 | 3.42833  | 2.36748   | 2.11789   | 1.20279  | 1.02079  | 2.09586  | 2.15405  |
| TCONS_00250789    | XLOC_021670       | -              | lincRNA            | 947  | chr6 | 29853803 | 29855607 | - | 2 | 6.13752 | 0.76051 | 4.13762  | 0.514901  | 2.48072   | 1.60415  | 0.947152 | 1.30198  | 1.08708  |
| TCONS_00252486    | XLOC_021016       | -              | lincRNA            | 561  | chr6 | 31789958 | 31795419 | + | 2 | 0.56273 | 1.58611 | 0.78835  | 0.890286  | 0.862587  | 0.19599  | 1.49609  | 1.36546  | 1.13377  |
| TCONS_00255903    | XLOC_021036       | -              | lincRNA            | 231  | chr6 | 32844889 | 32847416 | + | 2 | 0       | 0       | 2.0256   | 1.66945   | 0         | 0        | 1.78092  | 4.70182  | 3.18422  |
| ENST00000415875.2 | ENSG00000223837.2 | BRD2-IT1       | intronic_lincRNA   | 338  | chr6 | 32938009 | 32938663 | + | 2 | 1.45542 | 1.061   | 2.1391   | 0.939655  | 1.84562   | 2.58607  | 1.37421  | 0        | 1.30126  |
| TCONS_00255906    | XLOC_021041       | -              | lincRNA            | 3168 | chr6 | 33090892 | 33094390 | + | 2 | 0.61921 | 0.66628 | 0.3988   | 0.150907  | 0.186242  | 0.355313 | 0.196245 | 0.568086 | 0.932848 |
| ENST00000606432.1 | ENSG00000272217.1 | XXbac-BPG157A1 | lincRNA            | 594  | chr6 | 33213852 | 33214633 | - | 2 | 0.77378 | 0.54428 | 0.18021  | 0.815362  | 0         | 0.538399 | 0        | 0.416115 | 0        |
| TCONS_00250853    | XLOC_021744       | -              | intronic_lincRNA   | 896  | chr6 | 33676758 | 33678584 | - | 2 | 5.12235 | 3.47089 | 2.02031  | 1.38183   | 4.52879   | 2.32995  | 1.78111  | 2.33112  | 1.41753  |
| TCONS_00250862    | XLOC_021756       | -              | anti-sense_lincRNA | 707  | chr6 | 35198790 | 35227222 | - | 3 | 2.00681 | 0.84332 | 0.69668  | 0.253183  | 0.611384  | 1.25335  | 0.468808 | 0.964916 | 1.60736  |
| TCONS_00251535    | XLOC_021086       | -              | lincRNA            | 785  | chr6 | 37484382 | 37503661 | + | 4 | 0       | 1.45964 | 1.20474  | 0.328975  | 0         | 0.482438 | 0.404986 | 1.80739  | 1.78843  |
| TCONS_00261616    | XLOC_021774       | -              | lincRNA            | 1893 | chr6 | 37783286 | 37786757 | - | 2 | 1.2055  | 0.71016 | 0.70071  | 0.49155   | 0.799266  | 0.498649 | 1.10431  | 1.14089  | 0.682368 |
| TCONS_00248709    | XLOC_021115       | -              | lincRNA            | 1870 | chr6 | 42725878 | 42749651 | + | 2 | 2.93301 | 2.24461 | 1.62976  | 1.30332   | 1.28913   | 2.02211  | 1.01467  | 2.40977  | 1.27982  |
| TCONS_00257921    | XLOC_021145       | -              | lincRNA            | 2378 | chr6 | 45779901 | 45784279 | + | 2 | 0.98419 | 0.45428 | 0.35203  | 0.117537  | 0.197534  | 0.129159 | 0.187476 | 1.10718  | 0.821546 |
| TCONS_00258269    | XLOC_021827       | -              | lincRNA            | 406  | chr6 | 45794378 | 45799117 | - | 2 | 0.9815  | 0.41534 | 0        | 0         | 1.22338   | 0        | 0.424151 | 0        | 0        |
| TCONS_00254192    | XLOC_021827       | -              | lincRNA            | 2082 | chr6 | 45796718 | 45799049 | - | 2 | 3.30797 | 1.68364 | 2.14944  | 0.306095  | 0.0653416 | 0.186876 | 0.54537  | 1.11122  | 0.368183 |
| ENST00000444038.2 | ENSG00000231769.2 | RP1-8B1.4      | lincRNA            | 462  | chr6 | 46064830 | 46097328 | - | 3 | 8.89629 | 2.74724 | 11.7857  | 2.21231   | 3.82589   | 4.33227  | 9.04806  | 3.79997  | 4.48933  |
| TCONS_00249568    | XLOC_021830       | -              | lincRNA            | 1398 | chr6 | 46423582 | 46459173 | - | 2 | 14.4731 | 5.9113  | 7.53031  | 7.53778   | 7.40346   | 7.46266  | 12.1306  | 6.46395  | 3.04172  |
| ENST00000415787.1 | ENSG00000236466.1 | RP11-795J1.1   | lincRNA            | 622  | chr6 | 46459789 | 46500495 | + | 3 | 0       | 0.27772 | 4.88E-05 | 0.0001467 | 0         | 0        | 0.490092 | 0        | 4.11E-05 |
| TCONS_00253743    | XLOC_021148       | -              | lincRNA            | 733  | chr6 | 46497830 | 46500558 | + | 2 | 0.57279 | 0.58247 | 1.58906  | 0.842645  | 0.697488  | 0.927039 | 0.505152 | 1.37551  | 0.327425 |
| ENST00000446733.1 | ENSG00000226594.1 | RP11-550C4.6   | lincRNA            | 197  | chr6 | 47697563 | 47708477 | - | 2 | 5.57228 | 0       | 4.86975  | 0         | 0         | 0        | 0        | 0        | 3.75676  |
| TCONS_00257323    | XLOC_021840       | -              | lincRNA            | 1212 | chr6 | 48036629 | 48078962 | - | 2 | 0.806   | 1.05055 | 1.38395  | 2.27892   | 2.86303   | 3.20109  | 2.55253  | 1.83593  | 0.858059 |
| TCONS_00250926    | XLOC_021862       | -              | lincRNA            | 1689 | chr6 | 52644912 | 52647214 | - | 2 | 1.43895 | 0.99788 | 0.60968  | 0.0429985 | 0.661228  | 0.236286 | 0.981908 | 0.324545 | 0.232861 |
| ENST00000448327.1 | ENSG00000235899.1 | RP11-345L23.1  | lincRNA            | 566  | chr6 | 53493178 | 53496192 | + | 3 | 1.9428  | 0.39103 | 0.58299  | 0.175612  | 2.55186   | 0.386588 | 0.655541 | 0.224387 | 0        |
| TCONS_00254228    | XLOC_021875       | -              | lincRNA            | 852  | chr6 | 53611194 | 53658505 | - | 3 | 0       | 0.45023 | 1.43231  | 0.172438  | 0.996836  | 1.62447  | 0.269365 | 0.605668 | 0.307965 |
| TCONS_00250939    | XLOC_021875       | -              | lincRNA            | 1153 | chr6 | 53611305 | 53658726 | - | 2 | 2.24645 | 0.73435 | 1.15639  | 0.285514  | 1.64943   | 0.885556 | 1.11144  | 0.774909 | 0.336768 |
| ENST00000425089.1 | ENSG00000224984.1 | RP11-524H19.2  | lincRNA            | 586  | chr6 | 54704916 | 54705653 | - | 2 | 1.22369 | 1.48193 | 2.21462  | 0.499394  | 0.967069  | 0.820782 | 1.70658  | 0.849903 | 1.05928  |
| TCONS_00249605    | XLOC_021876       | -              | lincRNA            | 371  | chr6 | 54705431 | 54711254 | - | 2 | 0.79691 | 0       | 2.54805  | 2.66E-05  | 0.370277  | 1.05011  | 0.727353 | 0.493911 | 0        |
| TCONS_00261346    | XLOC_021181       | -              | lincRNA            | 239  | chr6 | 55823147 | 55848861 | + | 2 | 0       | 0       | 0        | 0         | 0         | 0        | 1.51753  | 4.01614  | 0        |
| ENST00000422882.1 | ENSG00000215190.4 | LINC00680      | lincRNA            | 2622 | chr6 | 58272361 | 58276677 | - | 2 | 3.24547 | 1.86701 | 2.01367  | 1.84952   | 3.06972   | 1.91619  | 2.43114  | 2.22263  | 1.59631  |
| TCONS_00260042    | XLOC_021884       | -              | intronic_lincRNA   | 1461 | chr6 | 62678004 | 62681315 | - | 2 | 2.58847 | 0.67376 | 1.82944  | 0.355492  | 1.90448   | 1.78622  | 0.418017 | 0.51155  | 0.550301 |
| TCONS_00257939    | XLOC_021191       | -              | intronic_lincRNA   | 5859 | chr6 | 64463180 | 64470313 | + | 2 | 1.93119 | 1.01001 | 1.17949  | 0.565163  | 1.43133   | 1.22941  | 1.10945  | 1.60084  | 2.30153  |
| ENST00000429530.1 | ENSG00000236345.1 | RP11-59D5_B.2  | anti-sense_lincRNA | 1454 | chr6 | 64516729 | 64532535 | + | 2 | 2.11485 | 1.97616 | 1.89548  | 0.561753  | 3.09371   | 2.24526  | 3.17615  | 1.8648   | 0.876196 |
| TCONS_00249628    | XLOC_021895       | -              | lincRNA            | 1529 | chr6 | 69339873 | 69341507 | - | 2 | 2.533   | 1.11851 | 0.8939   | 0.626372  | 0.741175  | 0.529576 | 1.45359  | 1.21298  | 0.652533 |
| TCONS_00259730    | XLOC_021205       | -              | intronic_lincRNA   | 5844 | chr6 | 72694571 | 72701515 | + | 2 | 9.37396 | 1.85036 | 2.83338  | 0.793331  | 4.15319   | 3.83501  | 4.0067   | 2.32953  | 5.31985  |
| TCONS_00249647    | XLOC_021919       | -              | lincRNA            | 4636 | chr6 | 77857578 | 77983649 | - | 4 | 2.31231 | 1.52222 | 1.79018  | 0.887613  | 0.774836  | 0.825281 | 1.27309  | 1.86564  | 0.877227 |
| TCONS_00260055    | XLOC_021919       | -              | lincRNA            | 1605 | chr6 | 77860252 | 78026620 | - | 5 | 2.07387 | 0.83775 | 1.68218  | 0.256751  | 0         | 1.6485   | 0.598362 | 2.68471  | 0.471964 |
| TCONS_00252136    | XLOC_021919       | -              | lincRNA            | 1403 | chr6 | 77860389 | 77983383 | - | 3 | 0       | 2.51353 | 0        | 1.05492   | 7.33E-05  | 0        | 2.60795  | 0        | 0.010746 |
| TCONS_00254761    | XLOC_021222       | -              | lincRNA            | 765  | chr6 | 80131512 | 80191228 | + | 3 | 4.32379 | 5.03938 | 3.49458  | 0.681317  | 1.86315   | 1.62368  | 4.61597  | 1.15227  | 2.05818  |
| ENST00000452402.1 | ENSG00000233967.2 | RP11-250B2.3   | lincRNA            | 682  | chr6 | 81153061 | 81175644 | + | 4 | 2.95264 | 1.27792 | 2.24653  | 0.39955   | 1.07737   | 1.19656  | 3.20491  | 2.85289  | 1.29654  |
| ENST00000427048.2 | ENSG00000233967.2 | RP11-250B2.3   | lincRNA            | 554  | chr6 | 81153107 | 81172770 | + | 4 | 3.7323  | 2.70223 | 2.95307  | 0.363193  | 2.3       |          |          |          |          |

|                   |                   |               |                    |       |      |           |           |   |   |         |          |         |           |           |          |           |          |           |
|-------------------|-------------------|---------------|--------------------|-------|------|-----------|-----------|---|---|---------|----------|---------|-----------|-----------|----------|-----------|----------|-----------|
| TCONS_00258744    | XLOC_021235       | -             | lincRNA            | 3955  | chr6 | 84683883  | 84694385  | + | 2 | 0.1362  | 0.28855  | 0.08437 | 0.319735  | 0.212924  | 0.371974 | 0.266547  | 0.139251 | 0.398518  |
| TCONS_00256029    | XLOC_021237       | -             | intronic_lincRNA   | 922   | chr6 | 84854037  | 84856267  | + | 2 | 0.70549 | 0.49191  | 0.38933 | 0.532777  | 1.54038   | 0.195282 | 0.163418  | 0.336912 | 0.401791  |
| ENST00000427501.1 | ENSG00000203875.6 | SNHG5         | lincRNA            | 680   | chr6 | 86386800  | 86387711  | - | 2 | 14.6224 | 12.6267  | 16.9417 | 15.1127   | 12.4068   | 18.3921  | 14.9997   | 10.8828  | 12.8626   |
| TCONS_00252676    | XLOC_021244       | -             | lincRNA            | 962   | chr6 | 88101671  | 88108032  | + | 2 | 2.00568 | 0.9318   | 1.56679 | 1.34597   | 1.53996   | 1.57247  | 1.39231   | 1.91405  | 1.44607   |
| TCONS_00249712    | XLOC_021962       | -             | lincRNA            | 922   | chr6 | 89841393  | 89853935  | - | 3 | 1.41098 | 0.68867  | 0.292   | 0.177592  | 0.171153  | 0.292923 | 0.65367   | 0.112304 | 0.642866  |
| TCONS_00249726    | XLOC_021972       | -             | lincRNA            | 531   | chr6 | 93298854  | 93299829  | - | 2 | 2.4536  | 1.73224  | 0.86173 | 0         | 0         | 0        | 1.81861   | 0.74638  | 0.530685  |
| TCONS_00256423    | XLOC_021973       | -             | lincRNA            | 381   | chr6 | 93650692  | 93654660  | - | 2 | 0       | 0        | 0       | 0         | 0         | 0        | 1.02788   | 0.465389 | 0         |
| TCONS_00258771    | XLOC_021261       | -             | lincRNA            | 812   | chr6 | 101329315 | 101579901 | + | 5 | 2.49821 | 0.70712  | 1.99012 | 1.30986   | 3.38116   | 1.2479   | 0.859049  | 2.95691  | 1.97594   |
| TCONS_00257981    | XLOC_021261       | -             | lincRNA            | 2339  | chr6 | 101329337 | 101581512 | + | 5 | 0.81048 | 0.42676  | 0.54445 | 0.254383  | 1.33781   | 0.4989   | 0.466796  | 0.591324 | 0.328854  |
| TCONS_00263238    | XLOC_021996       | -             | lincRNA            | 2491  | chr6 | 106126180 | 106341693 | - | 4 | 0.07323 | 0.15635  | 0.18458 | 0.487171  | 0.136714  | 0.369376 | 0.104274  | 1.18505  | 0.705665  |
| TCONS_00256437    | XLOC_021996       | -             | lincRNA            | 800   | chr6 | 106277634 | 106340929 | - | 3 | 0       | 0.43335  | 0.36017 | 1.6643    | 0.630054  | 1.70742  | 0.415695  | 2.05141  | 2.89144   |
| TCONS_00260089    | XLOC_021996       | -             | lincRNA            | 1073  | chr6 | 106312298 | 106341316 | - | 3 | 0.15838 | 0.18494  | 0.14976 | 0.513261  | 0.197524  | 0.600838 | 0.24864   | 0.748532 | 0.340663  |
| TCONS_00256052    | XLOC_021270       | -             | lincRNA            | 360   | chr6 | 107150835 | 107161887 | + | 2 | 1.25891 | 0        | 1.83136 | 0         | 1.18935   | 0        | 1.17189   | 1.05906  | 0.372056  |
| TCONS_00253855    | XLOC_021286       | -             | lincRNA            | 1437  | chr6 | 110736917 | 110742113 | + | 2 | 1.48421 | 1.20206  | 2.99561 | 0.3624    | 0.696983  | 0.341427 | 2.13104   | 1.56465  | 2.01034   |
| TCONS_00248952    | XLOC_021286       | -             | lincRNA            | 847   | chr6 | 110736958 | 110740102 | + | 2 | 1.8888  | 0.54941  | 1.95788 | 0         | 0.382337  | 0.109005 | 0.730881  | 1.0041   | 0.718031  |
| TCONS_00258010    | XLOC_021301       | -             | lincRNA            | 219   | chr6 | 113448006 | 113458830 | + | 2 | 0       | 0        | 0       | 0         | 0         | 0        | 0         | 3.06988  | 0         |
| TCONS_00251154    | XLOC_022030       | -             | lincRNA            | 2127  | chr6 | 113943154 | 113953894 | - | 4 | 2.19794 | 0.78688  | 1.88716 | 0.120698  | 1.41772   | 0.393057 | 1.47612   | 1.30853  | 1.33254   |
| TCONS_00249801    | XLOC_022030       | -             | lincRNA            | 1540  | chr6 | 113943231 | 113944979 | - | 3 | 0.95525 | 2.77E-05 | 0       | 1.88E-05  | 0.0231646 | 0        | 0         | 0        | 0.823275  |
| TCONS_00249802    | XLOC_022030       | -             | lincRNA            | 2549  | chr6 | 113943231 | 113949769 | - | 3 | 0.82178 | 0        | 0.16936 | 0.134664  | 0.204767  | 0.320591 | 0.0850101 | 0.346669 | 0.269009  |
| TCONS_00256464    | XLOC_022030       | -             | lincRNA            | 1457  | chr6 | 113943592 | 113945164 | - | 2 | 0.57156 | 0.31266  | 0.67544 | 0.531008  | 0.501327  | 0.813228 | 0.505415  | 0.353715 | 1.725     |
| TCONS_00251694    | XLOC_021304       | -             | lincRNA            | 849   | chr6 | 114312961 | 114317249 | + | 3 | 1.09842 | 1.42403  | 0.21686 | 0.494065  | 1.81046   | 0.434672 | 0.637513  | 1.12608  | 1.16317   |
| TCONS_00256070    | XLOC_021323       | -             | lincRNA            | 1119  | chr6 | 119855041 | 119872362 | + | 3 | 1.22014 | 1.00316  | 1.60161 | 1.53389   | 1.14101   | 1.83962  | 2.04674   | 2.02362  | 1.44964   |
| TCONS_00256904    | XLOC_021326       | -             | lincRNA            | 2800  | chr6 | 122088454 | 122286654 | + | 5 | 2.8664  | 2.90726  | 2.59869 | 5.11921   | 2.6937    | 2.70436  | 1.52423   | 1.54472  | 2.37443   |
| TCONS_00258381    | XLOC_022057       | -             | lincRNA            | 449   | chr6 | 125694290 | 125695466 | - | 2 | 0.39752 | 0.86811  | 0       | 0.258737  | 1.25941   | 0.278438 | 0.734111  | 1.00143  | 0.293009  |
| TCONS_00249834    | XLOC_022057       | -             | lincRNA            | 335   | chr6 | 125694413 | 125695451 | - | 2 | 2.98928 | 0        | 0       | 0.478854  | 0.471898  | 1.06975  | 0         | 0        | 0.77963   |
| TCONS_00255608    | XLOC_022058       | -             | lincRNA            | 2016  | chr6 | 126041153 | 126068081 | - | 3 | 1.23635 | 0.5451   | 1.07556 | 0.458222  | 1.8624    | 1.51068  | 1.09333   | 1.32902  | 0.222603  |
| TCONS_00250485    | XLOC_021342       | -             | lincRNA            | 4850  | chr6 | 126428102 | 126437160 | + | 5 | 4.94168 | 2.61064  | 3.44019 | 1.49951   | 2.65303   | 3.14381  | 2.06374   | 2.67327  | 3.03706   |
| TCONS_00259808    | XLOC_021344       | -             | lincRNA            | 289   | chr6 | 126653929 | 126656983 | + | 2 | 0       | 0        | 0       | 0         | 0         | 3.18639  | 0         | 0.970587 | 0.67234   |
| TCONS_00256484    | XLOC_022061       | -             | lincRNA            | 712   | chr6 | 127320997 | 127325509 | - | 2 | 1.19238 | 0.835    | 0.41385 | 0.626754  | 0.242139  | 0.413681 | 0.928239  | 2.70673  | 0.795748  |
| TCONS_00260124    | XLOC_022068       | -             | anti-sense_lincRNA | 29700 | chr6 | 129774304 | 129804095 | - | 2 | 1.62083 | 1.07078  | 1.22876 | 0.784717  | 1.53387   | 2.21702  | 1.44787   | 2.18205  | 1.94225   |
| ENST00000440246.1 | ENSG00000236166.1 | RP3-523C21.2  | lincRNA            | 490   | chr6 | 132411673 | 132420366 | + | 2 | 1.04921 | 1.23856  | 0.74046 | 0         | 0.646753  | 0.733196 | 0.834649  | 0.28511  | 1.01192   |
| TCONS_00256504    | XLOC_022082       | -             | lincRNA            | 286   | chr6 | 133125622 | 133126016 | - | 2 | 2.27737 | 0        | 0       | 2.97386   | 0         | 0.823023 | 2.24884   | 0        | 1.39017   |
| TCONS_00256511    | XLOC_022086       | -             | lincRNA            | 916   | chr6 | 134768293 | 134775659 | - | 2 | 0.28455 | 0.29764  | 0       | 1.07451   | 0.431497  | 0        | 0         | 0.113258 | 0.0810369 |
| TCONS_00254385    | XLOC_022088       | -             | lincRNA            | 521   | chr6 | 134844952 | 134845588 | - | 2 | 0.63238 | 0.67017  | 1.77863 | 1.20225   | 0.388795  | 0.441218 | 0.187743  | 0        | 0.365003  |
| ENST00000418837.1 | ENSG00000232310.2 | RP11-557H15.4 | lincRNA            | 892   | chr6 | 134846463 | 134861482 | - | 3 | 0       | 0.61608  | 0.30482 | 0.555937  | 0.714538  | 1.12079  | 0.0853138 | 0.351717 | 0.16774   |
| TCONS_00249910    | XLOC_022099       | -             | intronic_lincRNA   | 1676  | chr6 | 137357932 | 137365567 | - | 2 | 1.86635 | 0.86289  | 1.08822 | 0.173511  | 0.541998  | 0.572089 | 0.871752  | 1.41883  | 0.508994  |
| TCONS_00258056    | XLOC_021382       | -             | lincRNA            | 1314  | chr6 | 137893115 | 137897527 | + | 2 | 3.57018 | 0.31796  | 1.38185 | 0.114995  | 1.10619   | 1.07444  | 1.0002    | 0.869433 | 0.986861  |
| TCONS_00252764    | XLOC_021384       | -             | lincRNA            | 4313  | chr6 | 138145358 | 138185334 | + | 3 | 3.48797 | 1.11478  | 0.67968 | 0.276922  | 0.631798  | 0.451107 | 0.72495   | 0.312061 | 1.24148   |
| TCONS_00250520    | XLOC_021384       | -             | lincRNA            | 488   | chr6 | 138145448 | 138146030 | + | 2 | 1.59193 | 1.00917  | 0.94874 | 1.38468   | 0.362141  | 0.886646 | 2.04914   | 0        | 1.31038   |
| TCONS_00253917    | XLOC_021393       | -             | intronic_lincRNA   | 433   | chr6 | 139592465 | 139593006 | + | 2 | 0.43447 | 1.23874  | 2.16633 | 0.553272  | 0.269587  | 1.21928  | 2.09901   | 0        | 1.01222   |
| TCONS_00259832    | XLOC_021398       | -             | lincRNA            | 724   | chr6 | 141298057 | 141361546 | + | 2 | 0.97098 | 0.13595  | 0.40421 | 0.24494   | 0.354799  | 2.0208   | 14.8436   | 0.466522 | 0.111047  |
| TCONS_00261456    | XLOC_021399       | -             | lincRNA            | 514   | chr6 | 141725299 | 141767546 | + | 2 | 0       | 0.22845  | 0       | 0         | 0         | 0.451134 | 2.88138   | 0        | 0.186642  |
| TCONS_00263287    | XLOC_022128       | -             | lincRNA            | 2803  | chr6 | 143376545 | 143381787 | - | 2 | 1.17662 | 0.51565  | 1.3915  | 0.565414  | 1.18008   | 1.21556  | 0.78362   | 1.85152  | 0.997438  |
| TCONS_00254409    | XLOC_022134       | -             | lincRNA            | 2813  | chr6 | 145203501 | 145283897 | - | 4 | 0.68862 | 0.27035  | 2.26572 | 0.0244891 | 0.258622  | 0.269089 | 0.18098   | 0.789978 | 0.456115  |
| TCONS_00254410    | XLOC_022134       | -             | lincRNA            | 1190  | chr6 | 145257220 | 145284046 | - | 3 | 1.13283 | 0.50121  | 2.71307 | 0         | 0.379313  | 0.284557 | 0.303336  | 0.430907 | 0.740873  |
| TCONS_00261799    | XLOC_022134       | -             | lincRNA            | 530   | chr6 | 145257856 | 145283904 | - | 4 | 0.42296 | 0        | 4.2478  | 0         | 0.36086   | 0.214546 | 1.41779   | 2.75063  | 1.00689   |
| TCONS_00249100    | XLOC_021413       | -             | lincRNA            | 535   | chr6 | 145850892 | 145857407 | + | 2 | 1.21224 | 1.92512  | 1.48954 | 0.191954  | 0         | 0        | 0.179609  | 0        | 0.349496  |
| TCONS_00251804    | XLOC_021442       | -             | intronic_lincRNA   | 5478  | chr6 | 152084269 | 152090097 | + | 2 | 1.68352 | 1.61781  | 1.5151  | 3.44195   | 1.17433   | 2.19701  | 1.50919   | 1.88371  | 1.3322    |
| TCONS_00259853    | XLOC_021443       | -             | intronic_lincRNA   | 1137  | chr6 | 152388954 | 152392334 | + | 2 | 1.74074 | 1.05945  | 0.44876 | 0.683889  | 0.460778  | 0.676612 | 0.564495  | 0.949075 | 0.865351  |
| TCONS_00256553    | XLOC_022163       | -             | lincRNA            | 3585  | chr6 | 156486210 | 156497258 | - | 2 | 4.13268 | 1.27243  | 2.1384  | 0.756034  | 0.925143  | 0.747619 | 1.28988   | 1.58857  | 1.02218   |
| TCONS_00258452    | XLOC_022167       | -             | lincRNA            | 298   | chr6 | 157628587 | 157638979 | - | 2 | 0       | 0        | 0       | 0         | 1.30449   | 0        | 0         | 0        | 0         |
| TCONS_00258115    | XLOC_021488       | -             | intronic_lincRNA   | 1156  | chr6 | 161774193 | 161775742 | + | 2 | 0.42656 | 0.14835  | 0.07329 | 0         | 0.193515  | 0.147373 | 1.10619   | 0.760942 | 0.242297  |
| TCONS_00257724    | XLOC_022202       | -             | intronic_lincRNA   | 3064  | chr6 | 167170374 | 167184598 | - | 3 | 0.74863 | 0.49329  | 0.26745 | 1.87675   | 1.73725   | 1.86572  | 0.244082  | 0.476633 | 0.342404  |
| TCONS_00252882    | XLOC_021502       | -             | lincRNA            | 786   | chr6 | 167654877 | 167660717 | + | 3 | 1.3898  | 1.09285  | 0.3608  | 0         | 0.105631  | 0.120403 | 0.10107   | 0.277577 | 0.694302  |
| TCONS_00251868    | XLOC_021514       | -             | lincRNA            | 322   | chr6 | 169112554 | 169117008 | + | 2 | 0       | 1.19975  | 0       | 0.5296    | 0         | 0        | 0         | 0.703034 | 0         |
| TCONS_00259540    | XLOC_022220       | -             | intronic_lincRNA   | 4560  | chr6 | 169957744 | 169962470 | - | 2 | 5.0594  | 2.25027  | 3.06322 | 1.39387   | 2.8438    | 3.06287  | 1.56098   | 2.07881  | 2.922     |
| TCONS_00254005    | XLOC_021522       | -             | lincRNA            | 769   | chr6 | 170462342 | 170466316 | + | 3 | 3.34921 | 0.46669  | 3.08305 | 0.191272  | 2.93844   | 0.378482 | 1.27E-05  | 0.868366 | 0.409267  |
| TCONS_00254004    | XLOC_021522       | -             | lincRNA            | 623   | chr6 | 170462474 | 170466316 | + | 3 | 0.78792 | 0.21427  | 1.36078 | 0.349785  | 1.76223   | 0.325507 | 0.282298  | 0.372958 | 0.55091   |
| TCONS_00271801    | XLOC_022911       | -             | lincRNA            | 2178  | chr7 | 145842    | 149421    | - | 3 | 2.20958 | 1.11975  | 3.47368 | 1.18712   | 2.60147   | 0.682683 | 1.4775    | 3.2678   | 1.77986   |
| TCONS_00275861    | XLOC_022911       | -             | lincRNA            | 2433  | chr7 | 146026    | 149150    | - | 2 | 1.48837 | 1.29431  | 3.51013 | 0.999665  | 2.43515   | 1.91484  | 2.94955   | 0.490288 | 1.71535   |
| ENST00000497320.1 | ENSG00000242474.1 | AC093627.9    | lincRNA            |       |      |           |           |   |   |         |          |         |           |           |          |           |          |           |

|                   |                   |              |                    |      |      |          |          |   |   |         |         |         |           |           |          |          |          |           |
|-------------------|-------------------|--------------|--------------------|------|------|----------|----------|---|---|---------|---------|---------|-----------|-----------|----------|----------|----------|-----------|
| ENST00000487884.1 | ENSG00000242474.1 | AC093627.9   | lincRNA            | 496  | chr7 | 148329   | 149438   | - | 2 | 2.95389 | 0.68972 | 3.74414 | 0         | 2.28205   | 0.957609 | 5.75336  | 1.4786   | 0.922644  |
| TCONS_00277694    | XLOC_022251       | -            | lincRNA            | 689  | chr7 | 1609732  | 1615524  | + | 3 | 1.87232 | 1.45785 | 1.87925 | 1.57523   | 1.14148   | 1.44414  | 2.31088  | 1.83539  | 2.73899   |
| ENST00000430844.1 | ENSG00000228010.1 | AC073343.13  | lincRNA            | 532  | chr7 | 6703605  | 6713223  | + | 3 | 2.44626 | 1.07933 | 0.85906 | 0.774792  | 0.751385  | 1.4927   | 0.906463 | 1.48813  | 0.52906   |
| TCONS_00270356    | XLOC_022284       | -            | lincRNA            | 700  | chr7 | 6746736  | 6748031  | + | 2 | 2.44174 | 1.85305 | 0.7066  | 2.05393   | 0.868059  | 1.27098  | 0.951067 | 0.652454 | 1.04793   |
| TCONS_00267197    | XLOC_022289       | -            | lincRNA            | 696  | chr7 | 7030893  | 7034026  | + | 2 | 8.4096  | 4.16744 | 3.27706 | 0.388229  | 1.12518   | 1.99311  | 2.51719  | 2.96017  | 1.99557   |
| TCONS_00265779    | XLOC_022289       | -            | lincRNA            | 3876 | chr7 | 7030911  | 7141289  | + | 3 | 1.91379 | 0.59535 | 0.81963 | 0.165345  | 0.651341  | 0.524932 | 0.340785 | 0.425552 | 0.755895  |
| TCONS_00272278    | XLOC_022289       | -            | lincRNA            | 380  | chr7 | 7134514  | 7137751  | + | 2 | 6.22658 | 2.82392 | 4.33259 | 0.896747  | 0.0006474 | 1.79961  | 7.40152  | 1.17238  | 2.24507   |
| TCONS_00271820    | XLOC_022969       | -            | lincRNA            | 3554 | chr7 | 7588737  | 7595205  | - | 3 | 2.55307 | 0.8     | 2.05446 | 0.934551  | 1.19866   | 1.44619  | 0.985386 | 1.00553  | 1.45576   |
| ENST00000609307.1 | ENSG00000272894.1 | RP5-1159O4.1 | lincRNA            | 248  | chr7 | 7592368  | 7594380  | - | 2 | 3.96644 | 1.41439 | 1.47439 | 0.0100458 | 4.39958   | 0        | 9.31902  | 1.6753   | 0.388829  |
| ENST00000608807.1 | ENSG00000272894.1 | RP5-1159O4.1 | lincRNA            | 194  | chr7 | 7592484  | 7603957  | - | 3 | 0       | 0       | 5.37444 | 0         | 0         | 0        | 0        | 0        | 0         |
| TCONS_00275583    | XLOC_022292       | -            | lincRNA            | 1031 | chr7 | 7826190  | 7828928  | + | 2 | 0.98111 | 0.59774 | 0.75987 | 1.15684   | 0.594198  | 1.3567   | 0.708336 | 0.779252 | 0.97646   |
| TCONS_00270807    | XLOC_022972       | -            | lincRNA            | 1420 | chr7 | 7985237  | 7990313  | - | 2 | 1.42126 | 1.04476 | 1.43286 | 0.734915  | 1.00963   | 0.923187 | 0.528251 | 1.32218  | 0.995539  |
| TCONS_00272637    | XLOC_022974       | -            | lincRNA            | 207  | chr7 | 10130290 | 10139852 | - | 2 | 4.22346 | 0       | 0       | 0         | 0         | 0        | 0        | 4.18681  | 0         |
| TCONS_00267222    | XLOC_022300       | -            | lincRNA            | 703  | chr7 | 12543785 | 12570725 | + | 4 | 13.8812 | 10.068  | 20.9403 | 0.968537  | 5.60867   | 1.89436  | 10.765   | 7.45965  | 7.07745   |
| ENST00000424453.1 | ENSG00000226690.2 | AC005281.1   | lincRNA            | 562  | chr7 | 12544050 | 12580761 | + | 4 | 5.99702 | 9.47811 | 19.8337 | 2.38106   | 4.90249   | 1.85768  | 7.93851  | 10.663   | 3.36719   |
| TCONS_00271251    | XLOC_022307       | -            | lincRNA            | 1608 | chr7 | 17029581 | 17062110 | + | 2 | 1.73897 | 0.90472 | 1.43879 | 0.864033  | 1.35513   | 1.24952  | 1.03888  | 1.60225  | 0.985242  |
| TCONS_00271258    | XLOC_022309       | -            | lincRNA            | 2443 | chr7 | 17413922 | 17507393 | + | 3 | 1.10179 | 0       | 1.16288 | 0.124956  | 1.21231   | 0.47452  | 0.759061 | 0.266065 | 0.282618  |
| TCONS_00271840    | XLOC_023000       | -            | lincRNA            | 8769 | chr7 | 17470089 | 17479304 | - | 2 | 1.32321 | 0.58448 | 1.32998 | 0.432904  | 0.873346  | 2.09095  | 0.759269 | 1.28102  | 1.57994   |
| TCONS_00277431    | XLOC_023000       | -            | lincRNA            | 877  | chr7 | 17475793 | 17497813 | - | 3 | 0.75224 | 0.10497 | 0.93499 | 0.284145  | 0.365252  | 2.3956   | 1.39582  | 0.958985 | 1.20043   |
| TCONS_00265803    | XLOC_022309       | -            | lincRNA            | 1418 | chr7 | 17490397 | 17506904 | + | 2 | 1.99217 | 0.29069 | 5.14236 | 0.295528  | 1.45393   | 0.454562 | 1.38572  | 0.898897 | 0.52315   |
| TCONS_00270819    | XLOC_023000       | -            | lincRNA            | 4858 | chr7 | 17498933 | 17523274 | - | 5 | 1.09372 | 0.40809 | 0.90601 | 0.680194  | 0.583395  | 1.84129  | 0.669094 | 1.55794  | 1.13761   |
| TCONS_00274347    | XLOC_023000       | -            | lincRNA            | 1675 | chr7 | 17499222 | 17598558 | - | 6 | 1.40714 | 0.17584 | 1.60141 | 0.0278066 | 1.2974    | 2.55244  | 1.53657  | 1.01095  | 2.11844   |
| TCONS_00266566    | XLOC_023000       | -            | lincRNA            | 560  | chr7 | 17502744 | 17504930 | - | 2 | 0       | 0       | 0.4717  | 1.02414   | 0.0008207 | 0.877362 | 0.943734 | 0        | 0         |
| TCONS_00268894    | XLOC_023000       | -            | lincRNA            | 374  | chr7 | 17522147 | 17523192 | - | 2 | 0.44825 | 2.2555  | 0.04743 | 0.40643   | 3.49986   | 0        | 0        | 0        | 0         |
| TCONS_00268386    | XLOC_022310       | -            | intronic_lincRNA   | 8775 | chr7 | 18327943 | 18336810 | + | 2 | 2.39441 | 2.59953 | 4.60306 | 1.67819   | 2.82566   | 2.04033  | 2.24234  | 1.75667  | 1.54524   |
| TCONS_00266572    | XLOC_023005       | -            | lincRNA            | 331  | chr7 | 19867569 | 19868038 | - | 2 | 0       | 0       | 0       | 0         | 0         | 1.08986  | 0        | 0.652788 | 0.456584  |
| TCONS_00268900    | XLOC_023006       | -            | lincRNA            | 1731 | chr7 | 19999163 | 20008035 | - | 2 | 0.5109  | 0.11771 | 0.39955 | 1.63877   | 0.737003  | 1.35998  | 0.585758 | 0.946763 | 1.14194   |
| TCONS_00274352    | XLOC_023006       | -            | lincRNA            | 516  | chr7 | 20000507 | 20008181 | - | 2 | 0.42839 | 0.32976 | 0.73181 | 0.572283  | 1.71089   | 1.21222  | 0.698839 | 0        | 0.508726  |
| ENST00000432668.1 | ENSG00000228649.4 | AC005682.5   | lincRNA            | 574  | chr7 | 22895705 | 22896694 | + | 2 | 2.44476 | 1.14763 | 1.71066 | 2.92123   | 2.16358   | 4.91739  | 1.92317  | 1.09733  | 2.50006   |
| TCONS_00272986    | XLOC_022328       | -            | lincRNA            | 2936 | chr7 | 22898148 | 22909459 | + | 2 | 1.11946 | 1.44577 | 2.06182 | 2.47906   | 2.06558   | 4.44576  | 1.17128  | 1.37961  | 1.81336   |
| TCONS_00266580    | XLOC_023015       | -            | lincRNA            | 277  | chr7 | 22928141 | 22929162 | - | 2 | 2.51551 | 0       | 0       | 0         | 0.824236  | 0        | 0        | 0        | 0         |
| TCONS_00266591    | XLOC_023026       | -            | lincRNA            | 1890 | chr7 | 25397732 | 25419075 | - | 2 | 2.29452 | 0.79512 | 1.65166 | 0.0378787 | 1.01906   | 0.333023 | 0.311143 | 0.619085 | 0.375971  |
| TCONS_00276698    | XLOC_023030       | -            | anti-sense_lincRNA | 4908 | chr7 | 26211781 | 26227104 | - | 2 | 4.16497 | 2.12872 | 2.30455 | 1.60331   | 2.56816   | 2.47807  | 2.49531  | 2.06112  | 2.718     |
| TCONS_00275602    | XLOC_022345       | -            | lincRNA            | 563  | chr7 | 26600571 | 26609737 | + | 3 | 0       | 0       | 0.11972 | 0         | 0         | 3.48472  | 0        | 0        | 0         |
| TCONS_00275601    | XLOC_022345       | -            | lincRNA            | 1600 | chr7 | 26600571 | 26607380 | + | 3 | 0.21861 | 0.40441 | 0.06931 | 0.0914712 | 0         | 2.41888  | 0.125385 | 0.115105 | 0.0412873 |
| ENST00000411479.1 | ENSG00000233517.1 | AC005162.5   | lincRNA            | 578  | chr7 | 29026644 | 29028515 | + | 2 | 1.07512 | 0       | 0.18801 | 0.170009  | 0.658565  | 0.748461 | 0.158513 | 1.08543  | 0.772879  |
| TCONS_00265849    | XLOC_022352       | -            | lincRNA            | 2491 | chr7 | 29186217 | 29188810 | + | 2 | 1.9605  | 2.37499 | 2.67678 | 1.8157    | 2.06543   | 1.96449  | 2.18907  | 1.78899  | 3.12371   |
| TCONS_00268924    | XLOC_023041       | -            | intronic_lincRNA   | 553  | chr7 | 29336813 | 29337836 | - | 2 | 1.43851 | 3.24523 | 1.815   | 0.364228  | 0         | 0        | 0.340263 | 0        | 0         |
| TCONS_00271878    | XLOC_023042       | -            | anti-sense_lincRNA | 1211 | chr7 | 29552180 | 29603533 | - | 3 | 2.82379 | 2.73414 | 4.15598 | 3.10493   | 6.34152   | 5.15468  | 3.31     | 2.15738  | 1.317     |
| TCONS_00270394    | XLOC_022361       | -            | lincRNA            | 6913 | chr7 | 30256980 | 30267297 | + | 2 | 2.75403 | 1.35578 | 1.62569 | 0.895636  | 1.26124   | 1.08865  | 1.22062  | 1.36108  | 1.15877   |
| TCONS_00268928    | XLOC_023046       | -            | lincRNA            | 2335 | chr7 | 30283397 | 30295869 | - | 2 | 0.76495 | 1.12552 | 1.20804 | 0.779394  | 1.41066   | 0.757638 | 0.819744 | 1.01662  | 1.35183   |
| TCONS_00268946    | XLOC_023069       | -            | lincRNA            | 2571 | chr7 | 35652731 | 35655396 | - | 2 | 2.7555  | 1.63905 | 1.49878 | 1.75439   | 2.28066   | 3.02516  | 1.18037  | 1.45727  | 2.14185   |
| TCONS_00266639    | XLOC_023070       | -            | lincRNA            | 587  | chr7 | 35790018 | 35792592 | - | 2 | 2.62565 | 1.29329 | 0.55062 | 0.166036  | 0.321511  | 1.46187  | 0.154709 | 0.211913 | 0.301858  |
| TCONS_00270852    | XLOC_023070       | -            | lincRNA            | 743  | chr7 | 35795392 | 35833990 | - | 4 | 2.624   | 1.96711 | 2.98876 | 0.590848  | 1.59718   | 2.20972  | 1.63883  | 1.34974  | 2.03531   |
| TCONS_00268449    | XLOC_022384       | -            | lincRNA            | 401  | chr7 | 37723392 | 37725348 | + | 2 | 1.00562 | 3.9624  | 2.52581 | 3.85237   | 1.56826   | 1.41561  | 2.14628  | 0.834228 | 3.53277   |
| TCONS_00265890    | XLOC_022389       | -            | lincRNA            | 2835 | chr7 | 37979840 | 38000989 | + | 2 | 2.24719 | 0.75065 | 0.92518 | 0.194276  | 0.419659  | 0.026684 | 0.619248 | 0.335308 | 0.131373  |
| TCONS_00268452    | XLOC_022392       | -            | lincRNA            | 1998 | chr7 | 38370635 | 38374027 | + | 2 | 0.62435 | 0.4326  | 0.58199 | 0.534017  | 0.889251  | 0.391239 | 0.649617 | 0.760691 | 0.867234  |
| ENST00000577700.1 | ENSG00000232956.4 | SNHG15       | lincRNA            | 3116 | chr7 | 45022622 | 45026236 | - | 2 | 2.17085 | 2.37363 | 2.81768 | 5.22238   | 3.24375   | 3.64066  | 2.35716  | 2.42314  | 2.67051   |
| TCONS_00277484    | XLOC_023109       | -            | lincRNA            | 571  | chr7 | 45034461 | 45039166 | - | 2 | 0.82147 | 0.77137 | 0.38329 | 0.173233  | 0         | 0        | 0.323206 | 1.549    | 0.157536  |
| TCONS_00272349    | XLOC_022420       | -            | lincRNA            | 2083 | chr7 | 45225429 | 45229751 | + | 2 | 0.9214  | 0.71338 | 0.51855 | 1.15574   | 1.17552   | 0.635041 | 0.868145 | 0.854332 | 1.28796   |
| TCONS_00270441    | XLOC_022421       | -            | lincRNA            | 220  | chr7 | 45242537 | 45243892 | + | 2 | 0       | 0       | 2.58187 | 0         | 2.16171   | 2.34657  | 2.27906  | 2.99772  | 0         |
| TCONS_00272351    | XLOC_022424       | -            | lincRNA            | 249  | chr7 | 45817845 | 45821119 | + | 3 | 0       | 0       | 0       | 1.21267   | 0         | 2.69361  | 1.2668   | 0        | 0         |
| TCONS_00278495    | XLOC_022425       | -            | lincRNA            | 3358 | chr7 | 46017971 | 46033516 | + | 4 | 0.84064 | 0.93918 | 1.23445 | 0.364685  | 0.252802  | 0.578791 | 0.682255 | 1.24555  | 0.949677  |
| TCONS_00268990    | XLOC_023119       | -            | lincRNA            | 3294 | chr7 | 46812949 | 46825848 | - | 3 | 0.33001 | 1.01796 | 0.07449 | 0.206796  | 0.661744  | 0.59857  | 2.50992  | 2.41239  | 1.18131   |
| TCONS_00279368    | XLOC_023119       | -            | lincRNA            | 1724 | chr7 | 46823697 | 46825768 | - | 2 | 0.33475 | 0.90066 | 0.16903 | 0.294068  | 1.31868   | 1.13841  | 2.17354  | 2.5377   | 1.69217   |
| TCONS_00274068    | XLOC_022428       | -            | lincRNA            | 488  | chr7 | 47009293 | 47012310 | + | 3 | 0.35215 | 0.49893 | 0       | 0.223481  | 1.30267   | 0.492221 | 0.630518 | 0.287154 | 0.10190   |
| TCONS_00269006    | XLOC_023132       | -            | intronic_lincRNA   | 696  | chr7 | 50794860 | 50795912 | - | 2 | 1.23067 | 2.01187 | 1.28238 | 2.97642   | 2.12534   | 1.70838  | 0        | 0.493362 | 0.35216   |
| TCONS_00272364    | XLOC_022448       | -            | lincRNA            | 770  | chr7 | 55832457 | 55841462 | + | 2 | 12.1437 | 0       | 8.90599 | 23.4111   | 15.4249   | 28.1022  | 34.8294  | 13.9894  | 13.6677   |
| TCONS_00269016    | XLOC_023155       | -            | lincRNA            | 1588 | chr7 | 63384145 | 63386418 | - | 2 | 0.441   | 1.12177 | 1.15766 | 0.691973  | 0.443463  | 1.01405  | 0.590231 | 0.17416  | 0.791267  |
| TCONS_00268501    | XLOC_022464       | -            | lincRNA            | 929  | chr7 | 64338160 | 64340701 | + | 2 | 2.6552  | 1.16915 | 1.83136 | 0.37606   | 1.01698   | 0.676899 | 0.890021 | 1.1121   | 0.761915  |
| TCONS_00272371    | XLOC_022464       | -            | anti-sense_lincRNA | 367  | chr7 | 64340375 | 64354006 | + | 3 | 0       | 0       | 0       | 0         |           |          |          |          |           |

|                   |                   |               |                    |      |      |           |           |   |   |         |         |         |           |           |          |          |          |           |
|-------------------|-------------------|---------------|--------------------|------|------|-----------|-----------|---|---|---------|---------|---------|-----------|-----------|----------|----------|----------|-----------|
| TCONS_00269521    | XLOC_022464       | -             | anti-sense_lincRNA | 381  | chr7 | 64342928  | 64354027  | + | 3 | 3.34546 | 1.6042  | 2.81747 | 0.713548  | 1.04784   | 1.96727  | 1.37051  | 2.32697  | 1.96691   |
| TCONS_00268502    | XLOC_022464       | -             | anti-sense_lincRNA | 3528 | chr7 | 64350393  | 64354013  | + | 2 | 7.30229 | 1.99443 | 2.96988 | 0.653642  | 3.17362   | 5.13293  | 2.67658  | 1.80879  | 2.46065   |
| TCONS_00270469    | XLOC_022475       | -             | lincRNA            | 675  | chr7 | 65268361  | 65279175  | + | 4 | 0.64242 | 0       | 1.48899 | 0.810922  | 0.261228  | 1.04086  | 0.37591  | 2.40618  | 0.981102  |
| TCONS_00270470    | XLOC_022476       | -             | lincRNA            | 491  | chr7 | 65292495  | 65293859  | + | 2 | 0       | 0       | 1.47569 | 0.88465   | 0.214829  | 0        | 0        | 0.284099 | 0.201675  |
| TCONS_00269024    | XLOC_023163       | -             | lincRNA            | 840  | chr7 | 65952929  | 65956590  | - | 3 | 5.88729 | 2.44407 | 3.8492  | 2.00413   | 2.99581   | 2.09385  | 3.41801  | 2.66501  | 2.81307   |
| ENST00000412091.1 | ENSG00000223473.1 | GS1-124K5.3   | lincRNA            | 682  | chr7 | 65956996  | 65958553  | - | 2 | 2.74357 | 3.10646 | 3.52071 | 5.06096   | 2.57389   | 1.75827  | 1.48124  | 3.04785  | 2.29588   |
| TCONS_00266731    | XLOC_023165       | -             | lincRNA            | 748  | chr7 | 65994463  | 65996863  | - | 2 | 4.08595 | 2.72857 | 2.1886  | 1.99049   | 2.37369   | 2.44704  | 1.1906   | 2.52585  | 2.33495   |
| TCONS_00269532    | XLOC_022485       | -             | lincRNA            | 2089 | chr7 | 66347588  | 66359936  | + | 7 | 0.44202 | 0.92938 | 0.16804 | 0.943362  | 0.334059  | 0.469583 | 0.221635 | 0.779422 | 0.553164  |
| TCONS_00277203    | XLOC_022485       | -             | lincRNA            | 690  | chr7 | 66347706  | 66350337  | + | 3 | 1.23472 | 0.86935 | 1.26485 | 0.544505  | 1.36072   | 1.30849  | 2.00062  | 1.4643   | 0.733587  |
| TCONS_00267407    | XLOC_022485       | -             | lincRNA            | 941  | chr7 | 66347893  | 66358650  | + | 6 | 3.54914 | 0.48988 | 2.19256 | 1.5385    | 2.39693   | 2.457    | 0.171101 | 2.34747  | 0.644745  |
| TCONS_00278513    | XLOC_022485       | -             | lincRNA            | 1341 | chr7 | 66349567  | 66359225  | + | 5 | 1.45817 | 0.61934 | 0.31308 | 2.08883   | 1.24365   | 0.960132 | 0.342103 | 0.731855 | 1.48316   |
| TCONS_00277204    | XLOC_022485       | -             | lincRNA            | 968  | chr7 | 66350814  | 66358994  | + | 4 | 0.23134 | 0.19458 | 0.58958 | 0.668404  | 1.06152   | 0.818729 | 1.88291  | 0.748264 | 0.622506  |
| TCONS_00270483    | XLOC_022493       | -             | intronic_lincRNA   | 804  | chr7 | 70131895  | 70132889  | + | 2 | 2.19136 | 1.17776 | 2.09932 | 0.212396  | 1.94662   | 1.63519  | 0.391987 | 0.807527 | 0.866012  |
| ENST00000435932.1 | ENSG00000232415.1 | CTB-51J22.1   | anti-sense_lincRNA | 532  | chr7 | 73473906  | 73476614  | - | 2 | 21.7105 | 17.0535 | 31.3557 | 3.29287   | 5.63539   | 5.33108  | 23.7493  | 18.1057  | 11.2866   |
| TCONS_00269058    | XLOC_023207       | -             | lincRNA            | 946  | chr7 | 75717407  | 75723328  | - | 3 | 1.09257 | 1.3327  | 1.3183  | 0.687458  | 1.15923   | 0.472444 | 0.395185 | 1.30374  | 0.699783  |
| TCONS_00270514    | XLOC_022533       | -             | lincRNA            | 945  | chr7 | 76381632  | 76400569  | + | 3 | 0.68377 | 0.66725 | 1.41439 | 0.774431  | 0.165829  | 0.567697 | 0.712303 | 0.652758 | 0.856447  |
| TCONS_00268557    | XLOC_022534       | -             | lincRNA            | 2129 | chr7 | 76404272  | 76408672  | + | 2 | 1.164   | 1.06281 | 0.25307 | 0.597259  | 0.541831  | 0.911583 | 0.453918 | 0.542009 | 0.478916  |
| TCONS_00270523    | XLOC_022540       | -             | lincRNA            | 638  | chr7 | 77282848  | 77285243  | + | 2 | 0.92856 | 1.14082 | 1.29387 | 0.87972   | 1.41792   | 1.77463  | 0.680937 | 0.373408 | 1.46443   |
| ENST00000438324.1 | ENSG00000232756.1 | RP5-1185I7.1  | lincRNA            | 558  | chr7 | 77619737  | 77624488  | + | 2 | 11.9157 | 5.79858 | 9.54144 | 1.43646   | 7.6554    | 4.15053  | 7.71299  | 5.96789  | 5.71712   |
| TCONS_00274902    | XLOC_022543       | -             | anti-sense_lincRNA | 531  | chr7 | 77842164  | 77894282  | + | 3 | 0.6134  | 1.29918 | 0.64629 | 0         | 2.07266   | 1.06946  | 0.909303 | 0.248793 | 0.176895  |
| ENST00000422093.1 | ENSG00000234456.3 | MAGI2-AS3     | lincRNA            | 762  | chr7 | 79083308  | 79089085  | + | 4 | 14.8515 | 16.0863 | 18.0696 | 14.7268   | 10.1373   | 10.0455  | 19.4085  | 10.7163  | 7.34593   |
| ENST00000442765.1 | ENSG00000234456.3 | MAGI2-AS3     | lincRNA            | 679  | chr7 | 79099743  | 79100524  | + | 2 | 16.564  | 9.97387 | 10.9248 | 2.94845   | 5.43943   | 4.57081  | 14.1622  | 5.79382  | 3.52645   |
| TCONS_00266780    | XLOC_023230       | -             | lincRNA            | 1390 | chr7 | 81222961  | 81238032  | - | 4 | 1.54273 | 0.4761  | 0.88155 | 0.0538194 | 0.0517602 | 0        | 0.344721 | 0.271156 | 0.0972147 |
| TCONS_00272744    | XLOC_023236       | -             | lincRNA            | 597  | chr7 | 84118190  | 84122063  | - | 2 | 1.79191 | 0.36008 | 1.43051 | 5.1787    | 4.85608   | 2.31531  | 4.97279  | 4.3354   | 0.441221  |
| TCONS_00266822    | XLOC_023249       | -             | lincRNA            | 791  | chr7 | 89598678  | 89599784  | - | 2 | 1.89487 | 0.36117 | 0.23847 | 0.217083  | 0.209458  | 0        | 0.300591 | 1.51355  | 0.196678  |
| ENST00000433534.1 | ENSG00000227646.3 | STEAP2-AS1    | lincRNA            | 1005 | chr7 | 89838584  | 89840949  | - | 2 | 1.1393  | 0.26451 | 1.39499 | 0.159239  | 0.843597  | 0.350165 | 0.438937 | 1.10648  | 0.288062  |
| TCONS_00274149    | XLOC_022565       | -             | lincRNA            | 243  | chr7 | 90941836  | 90945488  | + | 2 | 0       | 0       | 0       | 0         | 4.07434   | 0        | 0        | 1.86574  | 0         |
| TCONS_00272437    | XLOC_022571       | -             | lincRNA            | 744  | chr7 | 92535113  | 92546872  | + | 2 | 0.74834 | 1.04718 | 0.51881 | 0.353855  | 1.36647   | 1.68666  | 0.8724   | 0.299381 | 0.106923  |
| TCONS_00277547    | XLOC_023273       | -             | lincRNA            | 2040 | chr7 | 93925730  | 93929280  | - | 2 | 0.94291 | 1.03752 | 0.75819 | 0.313089  | 0.701796  | 0.382295 | 1.17418  | 0.918119 | 0.313844  |
| ENST00000432265.1 | ENSG00000231170.1 | AC002451.3    | lincRNA            | 771  | chr7 | 95225994  | 95243031  | + | 2 | 1.06963 | 0.49859 | 0.37042 | 0         | 0.325302  | 0.247161 | 0.830259 | 0.56998  | 0.71272   |
| ENST00000448513.1 | ENSG00000227053.1 | RP11-395B7.4  | anti-sense_lincRNA | 372  | chr7 | 100657606 | 100660882 | - | 3 | 0       | 0       | 2.12257 | 0.375569  | 1.47226   | 0        | 9.40432  | 1.96362  | 2.41807   |
| TCONS_00268119    | XLOC_023343       | -             | lincRNA            | 1486 | chr7 | 102339661 | 102389278 | - | 3 | 9.67701 | 3.30305 | 3.15245 | 1.44408   | 3.20791   | 1.53249  | 6.55702  | 2.63305  | 3.19238   |
| TCONS_00274195    | XLOC_022655       | -             | intronic_lincRNA   | 258  | chr7 | 102628507 | 102628906 | + | 2 | 0       | 0       | 0       | 1.0576    | 0         | 4.69412  | 0        | 0        | 0         |
| TCONS_00277970    | XLOC_022657       | -             | lincRNA            | 717  | chr7 | 102789908 | 102855164 | + | 3 | 1.70513 | 0.82683 | 1.15304 | 0.322693  | 1.38957   | 1.06659  | 1.19541  | 1.02329  | 0.724656  |
| TCONS_00267582    | XLOC_022657       | -             | lincRNA            | 612  | chr7 | 102835038 | 102855145 | + | 2 | 1.31656 | 0.52019 | 1.47347 | 0.218351  | 0.966921  | 0.547193 | 0.521329 | 0.498715 | 0.7879    |
| ENST00000417026.1 | ENSG00000237513.1 | RP11-325F22.2 | lincRNA            | 891  | chr7 | 104581653 | 104602781 | + | 2 | 0.44223 | 0.30849 | 1.52634 | 5.75302   | 0.805028  | 1.93872  | 0.683516 | 1.40893  | 1.76384   |
| TCONS_00269183    | XLOC_023353       | -             | lincRNA            | 1266 | chr7 | 104613966 | 104615567 | - | 2 | 1.14788 | 1.46235 | 0.5253  | 0.480727  | 0.867199  | 0.792661 | 0.165119 | 0.454463 | 0.380037  |
| TCONS_00274201    | XLOC_022667       | -             | lincRNA            | 1999 | chr7 | 105549250 | 105560024 | + | 4 | 2.89312 | 1.5722  | 0.89188 | 1.17418   | 1.67496   | 1.56408  | 2.14254  | 0.983874 | 0.674139  |
| TCONS_00277593    | XLOC_023360       | -             | lincRNA            | 1215 | chr7 | 106011715 | 106025945 | - | 2 | 0.40181 | 0.62846 | 0.34496 | 1.76724   | 0.303673  | 0.416296 | 0.578385 | 0.47751  | 1.36881   |
| TCONS_00266947    | XLOC_023362       | -             | lincRNA            | 327  | chr7 | 106088636 | 106106270 | - | 2 | 0       | 0       | 0       | 1.0178    | 0.502274  | 1.68629  | 0.499465 | 0        | 0.471241  |
| TCONS_00266968    | XLOC_023383       | -             | lincRNA            | 428  | chr7 | 114830046 | 114871375 | - | 2 | 5.32675 | 0.31663 | 4.43125 | 0         | 0.27564   | 0.934725 | 1.61059  | 1.82895  | 0.776208  |
| TCONS_00278332    | XLOC_023384       | -             | lincRNA            | 1144 | chr7 | 115731582 | 115799936 | - | 5 | 1.50772 | 3.10246 | 3.5644  | 4.36892   | 2.22122   | 1.22249  | 4.72101  | 7.15382  | 12.5412   |
| TCONS_00270196    | XLOC_023384       | -             | lincRNA            | 722  | chr7 | 115750485 | 115799993 | - | 3 | 2.73663 | 4.87133 | 7.84265 | 0.40116   | 0         | 1.97667  | 3.77145  | 4.59865  | 14.8906   |
| TCONS_00272516    | XLOC_022705       | -             | lincRNA            | 874  | chr7 | 121120246 | 121130267 | + | 3 | 0.15112 | 0.42178 | 0.20871 | 0.475688  | 1.1924    | 0.62773  | 0.350535 | 0.481656 | 0.258386  |
| TCONS_00276536    | XLOC_022724       | -             | lincRNA            | 771  | chr7 | 128263250 | 128266474 | + | 3 | 8.02223 | 5.23521 | 4.3216  | 13.1456   | 4.55423   | 8.7742   | 3.73616  | 4.27485  | 7.63628   |
| TCONS_00269798    | XLOC_022737       | -             | intronic_lincRNA   | 2759 | chr7 | 128952479 | 128958049 | + | 2 | 4.86711 | 2.31898 | 3.45711 | 1.87547   | 4.27348   | 4.64366  | 2.73311  | 3.23333  | 4.71237   |
| TCONS_00275085    | XLOC_022753       | -             | lincRNA            | 2196 | chr7 | 133754462 | 133757463 | + | 2 | 2.24994 | 1.09787 | 0.97814 | 1.18645   | 2.27916   | 2.1495   | 0.789459 | 1.8532   | 1.56193   |
| TCONS_00272848    | XLOC_023437       | -             | lincRNA            | 240  | chr7 | 134948480 | 134951003 | - | 2 | 0       | 0       | 0       | 1.41089   | 2.86585   | 0        | 2.97797  | 0        | 0         |
| TCONS_00270260    | XLOC_023456       | -             | lincRNA            | 1559 | chr7 | 139945534 | 139960485 | - | 2 | 3.97848 | 3.07283 | 2.05656 | 1.64911   | 5.07321   | 3.83219  | 2.45482  | 2.54994  | 1.65898   |
| TCONS_00272860    | XLOC_023458       | -             | lincRNA            | 1389 | chr7 | 139994204 | 139996224 | - | 2 | 1.20091 | 0.23825 | 0.4443  | 0.0538647 | 0.182507  | 0.445215 | 0.492877 | 0.407064 | 1.10963   |
| TCONS_00271120    | XLOC_023458       | -             | lincRNA            | 406  | chr7 | 139995784 | 139997303 | - | 2 | 0       | 0.70254 | 5.08107 | 0         | 0.45172   | 1.54672  | 2.38999  | 8.73E-05 | 1.77724   |
| TCONS_00270691    | XLOC_022789       | -             | intronic_lincRNA   | 680  | chr7 | 141770850 | 141778421 | + | 5 | 0.21192 | 0.44565 | 1.03123 | 0         | 2.19703   | 0.147137 | 0.867751 | 0.340089 | 1.09211   |
| ENST00000471935.1 | ENSG00000241657.1 | TRBV11-2      | lincRNA            | 408  | chr7 | 142197570 | 142198069 | - | 2 | 0       | 0.34781 | 11.4906 | 1.86088   | 0.302829  | 0.341867 | 2.66143  | 2.01241  | 1.42122   |
| TCONS_00274625    | XLOC_023500       | -             | lincRNA            | 375  | chr7 | 143210637 | 143216521 | - | 2 | 1.15279 | 0.41515 | 0.41692 | 0.73818   | 0.723171  | 2.84961  | 0.355118 | 1.9284   | 0.339361  |
| TCONS_00274271    | XLOC_022828       | -             | lincRNA            | 3118 | chr7 | 148582300 | 148586290 | + | 2 | 2.09939 | 0.94396 | 2.6487  | 0.328916  | 2.33642   | 0.626438 | 2.27569  | 1.78859  | 1.58144   |
| TCONS_00269314    | XLOC_023520       | -             | intronic_lincRNA   | 1517 | chr7 | 150458326 | 150463066 | - | 2 | 1.05135 | 1.97826 | 0.10613 | 0.978553  | 1.4785    | 0.718426 | 0.482405 | 0.734465 | 3.71543   |
| TCONS_00276126    | XLOC_023520       | -             | intronic_lincRNA   | 1562 | chr7 | 150458373 | 150478989 | - | 2 | 0.78095 | 0.47783 | 0.3078  | 1.73359   | 0.559191  | 0.752173 | 1.08064  | 0.591693 | 1.92553   |
| TCONS_00268828    | XLOC_022882       | -             | lincRNA            | 2169 | chr7 | 152921816 | 152926082 | + | 2 | 1.91577 | 2.06334 | 0.81116 | 0.487595  | 0.621851  | 0.335762 | 0.842352 | 0.939366 | 0.415141  |
| TCONS_00275854    | XLOC_022882       | -             | lincRNA            | 1102 | chr7 | 152923213 | 152935860 | + | 4 | 0.79572 | 0.59197 | 0.08513 | 0.142079  | 0.484456  | 0.515505 | 1.27647  | 0        | 0.310982  |
| TCONS_00267790    | XLOC_022887       |               |                    |      |      |           |           |   |   |         |         |         |           |           |          |          |          |           |

|                   |                   |               |                    |      |      |           |           |   |   |         |         |         |           |          |           |          |          |          |
|-------------------|-------------------|---------------|--------------------|------|------|-----------|-----------|---|---|---------|---------|---------|-----------|----------|-----------|----------|----------|----------|
| TCONS_00278412    | XLOC_023546       | -             | anti-sense_lincRNA | 528  | chr7 | 156450235 | 156450946 | - | 2 | 0.73083 | 0       | 0       | 0         | 0.231353 | 0         | 0.683077 | 0        | 0.701091 |
| TCONS_00276143    | XLOC_023551       | -             | intronic_lincRNA   | 294  | chr7 | 158211151 | 158211497 | - | 2 | 0       | 0       | 0       | 0.683313  | 0        | 3.77939   | 0        | 1.83751  | 0.637322 |
| TCONS_00268841    | XLOC_022907       | -             | lincRNA            | 1765 | chr7 | 158785477 | 158795441 | + | 2 | 1.76036 | 2.53133 | 0.66912 | 0.613618  | 0.196563 | 0.584459  | 0.597667 | 0.411587 | 0.701458 |
| TCONS_00282816    | XLOC_023566       | -             | intronic_lincRNA   | 1195 | chr8 | 1821716   | 1823044   | + | 2 | 4.50859 | 5.05801 | 1.19663 | 1.80283   | 3.09811  | 3.11436   | 2.53766  | 1.3804   | 1.51286  |
| TCONS_00291779    | XLOC_024088       | -             | lincRNA            | 401  | chr8 | 2199482   | 2199953   | - | 2 | 3.01685 | 1.08066 | 0       | 0         | 0.313651 | 0         | 0        | 0.417114 | 1.76638  |
| TCONS_00284596    | XLOC_024098       | -             | lincRNA            | 1487 | chr8 | 4969991   | 5003332   | - | 3 | 0.31703 | 0.27504 | 0.27155 | 0.298543  | 2.10504  | 1.36723   | 0.955482 | 1.25285  | 0.22464  |
| TCONS_00288432    | XLOC_023582       | -             | lincRNA            | 693  | chr8 | 5382735   | 5596231   | + | 2 | 0.82542 | 0.14459 | 0       | 0         | 0.880527 | 1.5756    | 0.241227 | 0.496422 | 0        |
| TCONS_00282823    | XLOC_023605       | -             | lincRNA            | 383  | chr8 | 8777533   | 8793274   | + | 3 | 0       | 0.97528 | 0       | 0.0003106 | 0.34536  | 0         | 0.404948 | 2.99425  | 0.554804 |
| TCONS_00280891    | XLOC_023605       | -             | lincRNA            | 1554 | chr8 | 8790787   | 8794031   | + | 2 | 1.65753 | 0.86466 | 1.18692 | 1.13496   | 0.454645 | 1.19549   | 0.380586 | 0.862569 | 1.33588  |
| TCONS_00280916    | XLOC_023633       | -             | lincRNA            | 708  | chr8 | 16546161  | 16546968  | + | 2 | 0.20029 | 1.12219 | 0       | 0         | 0        | 0.138985  | 0        | 0.160497 | 0        |
| TCONS_00287663    | XLOC_023639       | -             | lincRNA            | 2626 | chr8 | 17658849  | 17679934  | + | 4 | 8.17725 | 3.67079 | 6.75782 | 1.51484   | 8.17782  | 6.66786   | 5.60225  | 3.58819  | 5.08114  |
| ENST00000520646.1 | ENSG00000253671.1 | RP11-806O11.1 | lincRNA            | 667  | chr8 | 17666450  | 17678377  | + | 3 | 3.33687 | 2.81502 | 4.5044  | 0         | 1.03079  | 1.00761   | 5.84818  | 2.91221  | 0.632636 |
| ENST00000520156.1 | ENSG00000253671.1 | RP11-806O11.1 | lincRNA            | 745  | chr8 | 17666720  | 17678134  | + | 2 | 8.84233 | 3.85798 | 7.24466 | 1.71567   | 8.793    | 9.23308   | 5.11641  | 2.98877  | 2.48795  |
| TCONS_00283549    | XLOC_023644       | -             | lincRNA            | 4674 | chr8 | 18027957  | 18032801  | + | 2 | 5.27294 | 2.47683 | 5.48806 | 0.300265  | 1.3719   | 1.3353    | 1.67711  | 1.14732  | 1.72651  |
| TCONS_00287410    | XLOC_024151       | -             | lincRNA            | 299  | chr8 | 21745041  | 21765911  | - | 2 | 0       | 0       | 0.7529  | 0         | 2.5828   | 0.718865  | 0        | 0        | 0.605521 |
| TCONS_00291642    | XLOC_023680       | -             | lincRNA            | 260  | chr8 | 23866439  | 24063102  | + | 2 | 0       | 0       | 1.21865 | 0         | 1.03465  | 0         | 1.06115  | 0        | 5.81409  |
| TCONS_00281479    | XLOC_024174       | -             | intronic_lincRNA   | 2144 | chr8 | 24242826  | 24245378  | - | 2 | 0.73502 | 0.54548 | 1.97296 | 1.15238   | 0.695771 | 1.15781   | 1.65144  | 1.90301  | 3.62348  |
| TCONS_00281007    | XLOC_023693       | -             | lincRNA            | 3051 | chr8 | 27447167  | 27450940  | + | 2 | 1.71895 | 0.27251 | 0.78159 | 0.0897735 | 0.473979 | 0.320586  | 0.2452   | 0.591476 | 0.384435 |
| TCONS_00281515    | XLOC_024201       | -             | lincRNA            | 3708 | chr8 | 30430513  | 30435516  | - | 2 | 3.37659 | 2.43536 | 3.13453 | 1.89673   | 2.78297  | 2.30443   | 1.54317  | 1.37259  | 2.86021  |
| TCONS_00284348    | XLOC_023710       | -             | intronic_lincRNA   | 359  | chr8 | 31875375  | 31882617  | + | 2 | 0.63334 | 0       | 0.46085 | 0         | 1.99505  | 1.79388   | 1.96623  | 2.13208  | 0        |
| TCONS_00282927    | XLOC_023713       | -             | lincRNA            | 766  | chr8 | 32785521  | 32902306  | + | 4 | 0.53952 | 1.29535 | 0.7042  | 3.17385   | 0.65641  | 0.498708  | 0.418876 | 0.762936 | 1.64361  |
| TCONS_00281029    | XLOC_023713       | -             | lincRNA            | 307  | chr8 | 32853735  | 32899359  | + | 2 | 0       | 0.47889 | 0.93725 | 0         | 0        | 0         | 0        | 0.558423 | 0        |
| TCONS_00284654    | XLOC_024214       | -             | lincRNA            | 3336 | chr8 | 37373133  | 37380921  | - | 3 | 1.79446 | 0.87131 | 1.1182  | 0.368535  | 0.450124 | 0.564466  | 0.665975 | 0.483601 | 0.337269 |
| TCONS_00291805    | XLOC_024214       | -             | lincRNA            | 1977 | chr8 | 37373291  | 37412271  | - | 5 | 2.29062 | 0.52952 | 1.00614 | 0.213856  | 0.450401 | 0.745036  | 0.563196 | 0.50295  | 0.671512 |
| TCONS_00283931    | XLOC_024216       | -             | lincRNA            | 1417 | chr8 | 37417349  | 37457673  | - | 3 | 0.51518 | 1.10506 | 0       | 0         | 0        | 0.117437  | 0.400341 | 0.144603 | 0        |
| TCONS_00281525    | XLOC_024216       | -             | lincRNA            | 3339 | chr8 | 37425007  | 37457412  | - | 2 | 3.79987 | 2.2337  | 2.639   | 0.663908  | 0.54372  | 1.28057   | 1.41626  | 1.10147  | 0.99645  |
| TCONS_00289272    | XLOC_024216       | -             | lincRNA            | 1561 | chr8 | 37454516  | 37457400  | - | 2 | 3.15073 | 1.96161 | 1.2324  | 0.208343  | 0.235577 | 1.12683   | 1.13278  | 0.87325  | 0.372413 |
| TCONS_00281541    | XLOC_024237       | -             | lincRNA            | 2711 | chr8 | 41298053  | 41305453  | - | 2 | 1.38231 | 1.4912  | 0.69359 | 0.688084  | 1.37023  | 2.24025   | 0.88211  | 1.18376  | 1.28683  |
| ENST00000521802.1 | ENSG00000253408.1 | RP11-231D20.2 | lincRNA            | 415  | chr8 | 42112846  | 42123216  | - | 3 | 1.39292 | 0.67245 | 0       | 0.29993   | 1.1709   | 0.0002687 | 1.99892  | 1.94418  | 0.67898  |
| TCONS_00281549    | XLOC_024244       | -             | lincRNA            | 483  | chr8 | 42112855  | 42121151  | - | 2 | 1.44729 | 0       | 0.25312 | 3.41E-05  | 0        | 0.751289  | 0        | 0        | 0.939683 |
| TCONS_00283960    | XLOC_024255       | -             | lincRNA            | 1195 | chr8 | 49531907  | 49533566  | - | 2 | 1.43455 | 1.35355 | 0.84468 | 1.03019   | 0.743548 | 0.77859   | 0.649169 | 0.324799 | 0.323247 |
| TCONS_00281560    | XLOC_024256       | -             | lincRNA            | 1326 | chr8 | 49623766  | 49625433  | - | 2 | 3.16993 | 0.88076 | 1.86409 | 0.113767  | 0.93019  | 0.43769   | 0.676977 | 0.215022 | 0.667989 |
| TCONS_00284378    | XLOC_023769       | -             | lincRNA            | 935  | chr8 | 50080585  | 50105816  | + | 2 | 0.13861 | 0.28988 | 1.81622 | 0         | 0.252154 | 1.05499   | 0.641916 | 1.4338   | 2.05208  |
| TCONS_00287479    | XLOC_024264       | -             | lincRNA            | 281  | chr8 | 54179940  | 54190937  | - | 2 | 0       | 0       | 0       | 2.35903   | 1.57097  | 0         | 1.59224  | 0        | 0        |
| ENST00000521558.1 | ENSG00000253369.1 | RP11-1081M5.1 | lincRNA            | 594  | chr8 | 54307771  | 54308506  | - | 2 | 0.25793 | 1.45142 | 0.36041 | 0         | 0        | 0.358932  | 0.607496 | 1.04029  | 0.444628 |
| ENST00000426023.1 | ENSG00000237807.3 | RP11-400K9.4  | lincRNA            | 2387 | chr8 | 54427731  | 54436491  | - | 2 | 8.16787 | 8.9511  | 9.52919 | 6.64277   | 6.23879  | 7.42818   | 7.97477  | 9.0046   | 5.33122  |
| TCONS_00282964    | XLOC_023779       | -             | lincRNA            | 370  | chr8 | 55422023  | 55445539  | + | 2 | 0.59307 | 0.42766 | 0       | 2.28009   | 0        | 1.67674   | 0        | 0        | 0        |
| ENST00000602362.1 | ENSG00000254142.2 | RP11-53M11.3  | lincRNA            | 241  | chr8 | 55467143  | 55471480  | + | 2 | 4.15232 | 0       | 0       | 0         | 0        | 0         | 2.92258  | 0        | 2.63325  |
| TCONS_00282968    | XLOC_023779       | -             | intronic_lincRNA   | 4918 | chr8 | 55697332  | 55702818  | + | 2 | 6.99185 | 2.64777 | 3.99492 | 0.366081  | 1.6521   | 2.01103   | 4.10481  | 3.39957  | 2.82219  |
| TCONS_00282969    | XLOC_023780       | -             | lincRNA            | 3213 | chr8 | 55795367  | 55800796  | + | 2 | 6.37081 | 2.46115 | 2.38009 | 0.488426  | 0.387295 | 1.89001   | 3.09284  | 1.65208  | 2.25894  |
| TCONS_00284386    | XLOC_023786       | -             | lincRNA            | 558  | chr8 | 58768019  | 58871026  | + | 3 | 3.40449 | 0.7998  | 4.9695  | 0.359114  | 0.521959 | 0.395289  | 2.17976  | 0.688603 | 0.816731 |
| TCONS_00282974    | XLOC_023788       | -             | lincRNA            | 431  | chr8 | 59116021  | 59131659  | + | 2 | 2.62914 | 2.81183 | 1.56127 | 0.558097  | 0.271976 | 0         | 0.794298 | 0        | 0.765894 |
| TCONS_00281112    | XLOC_023796       | -             | lincRNA            | 376  | chr8 | 61945736  | 61946260  | + | 2 | 2.29269 | 0.82546 | 0       | 0.366979  | 0        | 0.809501  | 0        | 0.479232 | 0.337382 |
| TCONS_00283288    | XLOC_024299       | -             | lincRNA            | 6864 | chr8 | 67116174  | 67133447  | - | 3 | 3.50999 | 2.36812 | 3.19384 | 0.986962  | 1.05549  | 1.3       | 1.99832  | 1.89395  | 2.49888  |
| TCONS_00281610    | XLOC_024299       | -             | lincRNA            | 553  | chr8 | 67123643  | 67133526  | - | 2 | 0       | 0.26852 | 1.7771  | 0.213329  | 0.239457 | 0.745036  | 0.655286 | 0.355924 | 0        |
| TCONS_00282530    | XLOC_024305       | -             | anti-sense_lincRNA | 1376 | chr8 | 68087531  | 68093471  | - | 2 | 2.25487 | 2.10784 | 1.36792 | 0.871378  | 1.46662  | 2.27479   | 0.946925 | 1.23484  | 1.27891  |
| TCONS_00283307    | XLOC_024312       | -             | lincRNA            | 4046 | chr8 | 72379487  | 72460010  | - | 3 | 7.8765  | 4.43751 | 5.16377 | 1.3754    | 3.77109  | 3.71847   | 3.6758   | 2.73677  | 2.03127  |
| TCONS_00283308    | XLOC_024312       | -             | lincRNA            | 2226 | chr8 | 72400513  | 72404688  | - | 2 | 4.88673 | 2.12825 | 2.34014 | 0.789774  | 1.79019  | 1.90934   | 1.15215  | 1.54782  | 1.11313  |
| TCONS_00284034    | XLOC_024312       | -             | lincRNA            | 4153 | chr8 | 72438566  | 72460010  | - | 4 | 7.2425  | 3.62962 | 4.56861 | 1.07322   | 2.86918  | 2.73014   | 2.91534  | 2.41126  | 1.58252  |
| TCONS_00283719    | XLOC_023817       | -             | anti-sense_lincRNA | 628  | chr8 | 72974042  | 73164965  | + | 2 | 1.18769 | 2.00196 | 0.99355 | 1.50061   | 0.870898 | 0.66049   | 0.697306 | 0.764653 | 1.90794  |
| TCONS_00289951    | XLOC_024322       | -             | lincRNA            | 3108 | chr8 | 73427679  | 73445907  | - | 3 | 0.63198 | 0.31574 | 0.40706 | 0.0440063 | 0.422428 | 0.21759   | 1.42221  | 0.800738 | 1.44803  |
| ENST00000518355.1 | ENSG00000253339.1 | RP11-434I12.3 | lincRNA            | 468  | chr8 | 74271148  | 74275023  | + | 2 | 0.25471 | 0.17912 | 0.3558  | 0.322038  | 4.75459  | 2.29953   | 8.09408  | 5.12536  | 7.62497  |
| ENST00000519134.1 | ENSG00000253339.1 | RP11-434I12.3 | lincRNA            | 599  | chr8 | 74271148  | 74274710  | + | 2 | 0       | 0       | 0       | 0.480543  | 3.38628  | 1.59403   | 5.89262  | 5.27268  | 6.11748  |
| TCONS_00289953    | XLOC_024326       | -             | lincRNA            | 253  | chr8 | 74289722  | 74295665  | - | 2 | 3.438   | 0       | 0       | 0         | 2.30051  | 2.52944   | 5.92452  | 4.7226   | 4.30761  |
| TCONS_00282213    | XLOC_023841       | -             | anti-sense_lincRNA | 2947 | chr8 | 77912575  | 77919560  | + | 2 | 3.49362 | 0       | 0       | 0.352769  | 1.39099  | 0         | 1.78138  | 0        | 1.10995  |
| TCONS_00283731    | XLOC_023841       | -             | anti-sense_lincRNA | 2951 | chr8 | 77912575  | 77919560  | + | 2 | 0       | 2.46474 | 3.03785 | 0.136199  | 0.129427 | 1.09898   | 0.127358 | 2.71493  | 1.03065  |
| TCONS_00286522    | XLOC_023844       | -             | anti-sense_lincRNA | 6786 | chr8 | 79635296  | 79647480  | + | 2 | 5.99506 | 3.11088 | 6.10558 | 1.27221   | 3.18719  | 2.64662   | 1.77957  | 2.38443  | 3.23953  |
| TCONS_00287275    | XLOC_023844       | -             | lincRNA            | 5550 | chr8 | 79635349  | 79641850  | + | 2 | 9.43929 | 4.374   | 6.88895 | 2.00874   | 4.52934  | 3.51978   | 3.5572   | 3.20817  | 4.27381  |
| TCONS_00284441    | XLOC_023847       | -             | lincRNA            | 486  | chr8 | 80655434  | 80660296  | + | 2 | 0       | 0.50248 | 0.50076 | 0         | 1.53061  | 0.991387  | 0.423411 | 0.578455 | 0        |
| TCONS_00281674    | XLOC_024355       | -             | lincRNA            | 415  | chr8 | 86374945  | 86375489  | - | 2 | 2.3522  | 0.33623 | 0.67283 | 0.299975  | 1.1709   | 0         | 0        | 1.16651  | 0.549532 |
| TCONS_00282589    | XLOC_024364       | -             | lincRNA            | 1418 | chr8 | 90659750  | 90661878  | - | 2 | 1.67481 | 2.03483 | 1.66486 | 1.36709   | 1.41581  | 2.83191   | 1.58738  | 1.7879   | 1.23461  |

|                   |                   |               |                    |       |      |           |           |   |   |         |         |          |          |          |          |           |          |          |
|-------------------|-------------------|---------------|--------------------|-------|------|-----------|-----------|---|---|---------|---------|----------|----------|----------|----------|-----------|----------|----------|
| TCONS_00284457    | XLOC_023884       | -             | lincRNA            | 3090  | chr8 | 94840969  | 94844325  | + | 2 | 2.40234 | 1.24639 | 1.49383  | 0.154982 | 0.765115 | 0.705495 | 0.765944  | 0.583468 | 1.23751  |
| TCONS_00283034    | XLOC_023887       | -             | lincRNA            | 784   | chr8 | 95565886  | 95582871  | + | 2 | 1.01528 | 1.34032 | 1.14024  | 0.65908  | 0.847974 | 0.724902 | 1.01423   | 1.67126  | 1.32408  |
| ENST00000523011.1 | ENSG00000253704.1 | RP11-267M23.4 | lincRNA            | 1789  | chr8 | 95565950  | 95581973  | + | 2 | 1.3598  | 0.89035 | 1.29824  | 0.241735 | 0.619466 | 0.75273  | 1.43464   | 1.064    | 0.679793 |
| TCONS_00285931    | XLOC_023891       | -             | lincRNA            | 703   | chr8 | 95969851  | 95988190  | + | 2 | 0.20227 | 1.41683 | 0.84278  | 2.16923  | 1.10934  | 0.561495 | 0.472628  | 1.4591   | 0.810145 |
| TCONS_00284086    | XLOC_024404       | -             | intronic_lincRNA   | 1241  | chr8 | 99675590  | 99680924  | - | 2 | 2.93848 | 2.11033 | 2.1521   | 2.27685  | 2.96046  | 4.12637  | 1.74769   | 2.48254  | 2.33528  |
| ENST00000521696.1 | ENSG00000253948.1 | RP11-410L14.2 | lincRNA            | 380   | chr8 | 100008991 | 100025272 | - | 2 | 1.68188 | 2.82333 | 2.83381  | 2.51139  | 1.40509  | 1.18699  | 3.79114   | 4.21285  | 0.659376 |
| TCONS_00282273    | XLOC_023911       | -             | intronic_lincRNA   | 2026  | chr8 | 100595503 | 100598929 | + | 3 | 3.12985 | 1.31655 | 2.8269   | 1.68262  | 2.45834  | 2.69662  | 2.04669   | 2.46719  | 1.86592  |
| TCONS_00285606    | XLOC_024419       | -             | anti-sense_lincRNA | 1820  | chr8 | 102503009 | 102505017 | - | 2 | 7.49554 | 4.71556 | 6.63517  | 1.06697  | 5.27827  | 2.73606  | 4.00449   | 3.42872  | 3.10252  |
| TCONS_00287304    | XLOC_023924       | -             | lincRNA            | 306   | chr8 | 103668748 | 103678469 | + | 2 | 0       | 0       | 0        | 0        | 1.20623  | 0        | 0         | 0        | 0        |
| ENST00000517910.1 | ENSG00000253669.3 | KB-1732A1.1   | lincRNA            | 2770  | chr8 | 103819050 | 103822199 | + | 2 | 0.35751 | 0.4673  | 0.75892  | 0.896367 | 0.478107 | 0.62927  | 0.657662  | 0.531357 | 0.516362 |
| TCONS_00284500    | XLOC_023927       | -             | lincRNA            | 2139  | chr8 | 103979360 | 104004705 | + | 3 | 3.78983 | 1.89587 | 2.1579   | 1.25437  | 1.90245  | 1.85003  | 1.65573   | 2.1568   | 1.31021  |
| TCONS_00283374    | XLOC_024427       | -             | intronic_lincRNA   | 620   | chr8 | 104169240 | 104178645 | - | 2 | 2.17836 | 2.21071 | 3.54508  | 1.07052  | 1.92338  | 1.68287  | 0.995371  | 0.584661 | 2.36151  |
| TCONS_00285627    | XLOC_024427       | -             | anti-sense_lincRNA | 2886  | chr8 | 104256739 | 104311223 | - | 3 | 2.50863 | 1.73573 | 2.593    | 1.42938  | 2.17272  | 1.83238  | 2.29958   | 2.36224  | 2.89966  |
| TCONS_00285628    | XLOC_024427       | -             | lincRNA            | 1891  | chr8 | 104278311 | 104281071 | - | 2 | 3.62079 | 1.75658 | 2.88869  | 1.02212  | 1.52768  | 1.83054  | 2.28036   | 2.76043  | 3.0743   |
| TCONS_00284770    | XLOC_024434       | -             | anti-sense_lincRNA | 1865  | chr8 | 107531171 | 107535193 | - | 2 | 0.4903  | 0.50974 | 0.62872  | 0.307585 | 1.03441  | 0.671063 | 0.526415  | 0.870138 | 0.451023 |
| TCONS_00289991    | XLOC_024443       | -             | lincRNA            | 1259  | chr8 | 110246395 | 110247726 | - | 2 | 2.98492 | 1.73971 | 1.58641  | 1.0888   | 2.03691  | 1.79531  | 2.38253   | 1.06749  | 1.6942   |
| TCONS_00281764    | XLOC_024456       | -             | lincRNA            | 899   | chr8 | 117271767 | 117272980 | - | 2 | 1.60299 | 0.10164 | 0.40231  | 0.458629 | 0.265246 | 0.302598 | 0.422222  | 1.27654  | 0.664188 |
| TCONS_00285961    | XLOC_023957       | -             | lincRNA            | 359   | chr8 | 117466370 | 117480195 | + | 3 | 2.53336 | 1.37397 | 1.38255  | 0        | 0.39901  | 0.896941 | 1.17974   | 0.53302  | 2.6212   |
| TCONS_00281771    | XLOC_024462       | -             | lincRNA            | 2633  | chr8 | 118722530 | 118725913 | - | 4 | 2.10557 | 0.62431 | 1.0309   | 0.420836 | 0.984929 | 0.549134 | 0.71263   | 0.930659 | 0.609476 |
| TCONS_00291052    | XLOC_024462       | -             | lincRNA            | 451   | chr8 | 118725048 | 118726036 | - | 3 | 0.73369 | 0.71796 | 0.57303  | 0        | 0        | 0.28275  | 0.305544  | 1.59498  | 0.305517 |
| TCONS_00289156    | XLOC_023963       | -             | lincRNA            | 1686  | chr8 | 119915695 | 119918585 | + | 2 | 0.6866  | 0.23807 | 0.61092  | 0.215427 | 1.49078  | 2.88851  | 0.472275  | 0.650409 | 0.622222 |
| TCONS_00284520    | XLOC_023963       | -             | lincRNA            | 637   | chr8 | 120049799 | 120050886 | + | 2 | 0.23267 | 0.16335 | 0.32422  | 0.440871 | 0.852726 | 1.13191  | 0.273016  | 0.374281 | 0.266878 |
| TCONS_00283398    | XLOC_024472       | -             | lincRNA            | 399   | chr8 | 121084531 | 121092871 | - | 3 | 0       | 1.45571 | 0.36461  | 0.324281 | 0        | 0        | 0.619743  | 0        | 0        |
| TCONS_00282716    | XLOC_024475       | -             | lincRNA            | 731   | chr8 | 122381396 | 122397197 | - | 2 | 2.10812 | 0.4024  | 1.86105  | 0.483398 | 0.466762 | 0        | 1.11782   | 1.68763  | 0.328703 |
| TCONS_00284793    | XLOC_024483       | -             | lincRNA            | 600   | chr8 | 124868806 | 124870711 | - | 2 | 0       | 1.60802 | 1.06466  | 0.321229 | 0.155456 | 0.353513 | 0.897153  | 1.22918  | 0.29191  |
| ENST00000533496.1 | ENSG00000255080.1 | RP11-1082L8.3 | lincRNA            | 553   | chr8 | 125847126 | 125869758 | - | 3 | 0.5754  | 0       | 0        | 0.364228 | 1.58842  | 0.400929 | 0.680526  | 0        | 0        |
| TCONS_00284534    | XLOC_023983       | -             | lincRNA            | 315   | chr8 | 125910684 | 125923948 | + | 2 | 0.86741 | 0       | 2.58313  | 0        | 0        | 0.620469 | 1.10954   | 0        | 0        |
| TCONS_00288601    | XLOC_023987       | -             | lincRNA            | 342   | chr8 | 126660682 | 126692442 | + | 3 | 0       | 1.02823 | 0.51865  | 0.455261 | 0.896193 | 2.01031  | 0         | 0.600029 | 2.10237  |
| TCONS_00284537    | XLOC_023990       | -             | lincRNA            | 860   | chr8 | 127878079 | 128018965 | + | 4 | 0.30862 | 0.44944 | 2.23859  | 0.194323 | 0.79482  | 0.510706 | 0.179054  | 0.492019 | 0.43985  |
| TCONS_00281325    | XLOC_023990       | -             | lincRNA            | 387   | chr8 | 127889731 | 127938644 | + | 2 | 1.61982 | 2.26008 | 0        | 0.690496 | 0.337776 | 0.845274 | 0         | 0.449785 | 1.65E-05 |
| TCONS_00281811    | XLOC_024497       | -             | lincRNA            | 444   | chr8 | 128302004 | 128307041 | - | 2 | 1.66026 | 2.36341 | 0.88509  | 1.32038  | 0.771479 | 1.16377  | 0.249966  | 0.681817 | 1.44837  |
| TCONS_00288789    | XLOC_024500       | -             | lincRNA            | 753   | chr8 | 128926548 | 128939069 | - | 2 | 0.3681  | 0.77247 | 0.12756  | 2.08846  | 0.672001 | 1.40384  | 0.643414  | 0.588851 | 0.21033  |
| TCONS_00283098    | XLOC_023995       | -             | lincRNA            | 5995  | chr8 | 129009454 | 129027277 | + | 3 | 2.74951 | 2.4231  | 3.32332  | 3.49901  | 4.17193  | 7.25179  | 2.24696   | 3.8181   | 5.14132  |
| TCONS_00291072    | XLOC_024511       | -             | lincRNA            | 449   | chr8 | 132855796 | 132897118 | - | 3 | 0       | 0.57874 | 0.5778   | 0        | 0.251881 | 0        | 0         | 1.66905  | 0.945771 |
| TCONS_00281834    | XLOC_024516       | -             | lincRNA            | 1085  | chr8 | 133696457 | 133699897 | - | 2 | 1.15173 | 0.1603  | 0.31691  | 0.724068 | 1.11542  | 0.318418 | 0.0664519 | 0.913998 | 0.196394 |
| TCONS_00282750    | XLOC_024517       | -             | intronic_lincRNA   | 1733  | chr8 | 134139147 | 134141605 | - | 2 | 2.39608 | 1.01529 | 1.45743  | 0.96055  | 0.561911 | 0.367193 | 0.381406  | 0.840466 | 0.942312 |
| TCONS_00284812    | XLOC_024520       | -             | lincRNA            | 254   | chr8 | 134375500 | 134376852 | - | 2 | 0       | 0       | 0        | 0        | 0        | 3.73658  | 0         | 0        | 0        |
| TCONS_00281341    | XLOC_024012       | -             | lincRNA            | 1466  | chr8 | 137501561 | 137549927 | + | 5 | 2.04894 | 0.1879  | 1.76999  | 6.49E-05 | 0.567274 | 1.08618  | 0.692508  | 0.605854 | 1.37904  |
| TCONS_00290383    | XLOC_024012       | -             | lincRNA            | 2601  | chr8 | 137501672 | 137533582 | + | 3 | 2.4175  | 0.58972 | 1.17459  | 0        | 0.622729 | 0.594191 | 1.49554   | 0.558064 | 1.14171  |
| ENST00000523232.1 | ENSG00000253839.1 | RP11-431D12.1 | lincRNA            | 564   | chr8 | 137501691 | 137542119 | + | 4 | 5.59426 | 2.87073 | 4.00004  | 0.988276 | 1.19812  | 1.58902  | 3.00514   | 1.13274  | 1.17336  |
| TCONS_00283116    | XLOC_024012       | -             | lincRNA            | 1622  | chr8 | 137527832 | 137549891 | + | 4 | 0.47808 | 0.99526 | 0        | 0.243237 | 2.30E-05 | 0        | 0.625677  | 0.271464 | 0        |
| ENST00000520885.1 | ENSG00000253210.1 | RP11-809O17.1 | lincRNA            | 483   | chr8 | 142136143 | 142138220 | - | 2 | 1.07496 | 1.77769 | 0.75935  | 5.68637  | 1.54716  | 4.25846  | 2.7826    | 4.38592  | 4.35722  |
| TCONS_00290030    | XLOC_024543       | -             | lincRNA            | 824   | chr8 | 143262067 | 143264093 | - | 2 | 0.65273 | 0.3419  | 0.45135  | 0        | 0.19828  | 0.33912  | 1.04273   | 0.260418 | 0.279275 |
| TCONS_00283138    | XLOC_024047       | -             | lincRNA            | 341   | chr8 | 144871466 | 144872038 | + | 2 | 0       | 0.51783 | 0.52249  | 0.458492 | 1.35406  | 0        | 0         | 0        | 0.423526 |
| TCONS_00288632    | XLOC_024063       | -             | intronic_lincRNA   | 294   | chr8 | 145229813 | 145230458 | + | 2 | 2.09842 | 1.55536 | 0.79339  | 1.36636  | 2.03907  | 3.77939  | 1.36918   | 4.59379  | 0.637322 |
| TCONS_00288840    | XLOC_024583       | -             | intronic_lincRNA   | 401   | chr8 | 145628265 | 145630837 | - | 2 | 0.50281 | 0.36022 | 0        | 0.642062 | 1.56826  | 0.707807 | 0         | 2.50268  | 0.588795 |
| TCONS_00300901    | XLOC_024616       | -             | lincRNA            | 556   | chr9 | 1460223   | 1476858   | + | 4 | 0.28529 | 0       | 0.19993  | 0        | 0.680647 | 1.1027   | 0.168648  | 1.15429  | 0        |
| TCONS_00296511    | XLOC_024616       | -             | lincRNA            | 385   | chr9 | 1475367   | 1476631   | + | 2 | 0.54569 | 0       | 0.349007 | 1.40372  | 0.943743 | 0        | 0         | 0        | 1.60273  |
| TCONS_00295272    | XLOC_025154       | -             | lincRNA            | 2524  | chr9 | 2450964   | 2493570   | - | 2 | 1.71306 | 1.09458 | 2.03894  | 0.220295 | 0.528839 | 0.151294 | 0.526911  | 0.760719 | 0.347657 |
| TCONS_00296862    | XLOC_025155       | -             | lincRNA            | 608   | chr9 | 2502913   | 2506535   | - | 2 | 1.74385 | 2.27654 | 2.7822   | 0.314902 | 0.457095 | 0.346537 | 0.29301   | 0.200752 | 0.143054 |
| TCONS_00298088    | XLOC_024620       | -             | lincRNA            | 2686  | chr9 | 3602523   | 3610232   | + | 3 | 3.94222 | 1.53464 | 2.71828  | 1.69891  | 3.55895  | 3.84676  | 2.3448    | 1.74508  | 2.52998  |
| TCONS_00297235    | XLOC_024620       | -             | lincRNA            | 7634  | chr9 | 3645341   | 3653842   | + | 2 | 4.72837 | 2.28107 | 3.18066  | 2.00689  | 4.00433  | 3.95396  | 2.75819   | 2.39487  | 2.91096  |
| TCONS_00295698    | XLOC_024620       | -             | lincRNA            | 2851  | chr9 | 3647731   | 3653850   | + | 2 | 4.0774  | 0.86949 | 2.80592  | 1.07996  | 3.3547   | 2.27269  | 2.26645   | 1.84331  | 1.66293  |
| ENST00000457566.1 | ENSG00000232104.2 | RP11-509J21.1 | lincRNA            | 496   | chr9 | 3668086   | 3671646   | + | 2 | 10.2312 | 5.75116 | 7.40449  | 3.04365  | 9.21574  | 5.89385  | 8.78309   | 3.77611  | 4.88444  |
| TCONS_00292647    | XLOC_024620       | -             | lincRNA            | 11328 | chr9 | 3669500   | 3683592   | + | 2 | 5.67459 | 1.85258 | 3.29871  | 1.37932  | 4.7584   | 3.44971  | 3.99219   | 3.12034  | 2.53307  |
| TCONS_00292649    | XLOC_024621       | -             | lincRNA            | 1842  | chr9 | 3734629   | 3738992   | + | 2 | 3.0451  | 0.60306 | 1.06263  | 0.194937 | 1.23627  | 0.728395 | 1.17445   | 0.73533  | 0.809179 |
| TCONS_00296519    | XLOC_024623       | -             | lincRNA            | 241   | chr9 | 3800757   | 3801599   | + | 2 | 0       | 0       | 1.66788  | 0        | 0        | 0        | 0         | 0        | 1.31663  |
| TCONS_00293232    | XLOC_025159       | -             | lincRNA            | 604   | chr9 | 4347111   | 4348762   | - | 2 | 2.0126  | 0.35375 | 0.52694  | 0.159017 | 1.07727  | 0.699981 | 0         | 0.405573 | 0        |
| TCONS_00301158    | XLOC_025162       | -             | lincRNA            | 406   | chr9 | 4676470   | 4679434   | - | 2 | 0.49075 | 1.40507 | 0.35172  | 0.626362 | 1.22338  | 2.07133  | 0.597497  | 2.8459   | 0.574148 |
| ENST00000607997.1 | ENSG00000273061.1 | RP11-6J24.6   | lincRNA            | 463   | chr9 | 4678819   | 4679502   | - | 2 | 3.0827  | 0.82097 | 3.54912  | 0.734612 | 1.19095  | 0.539456 | 1.8       |          |          |

|                   |                   |               |                    |       |      |           |           |   |   |         |         |         |           |           |           |           |          |          |
|-------------------|-------------------|---------------|--------------------|-------|------|-----------|-----------|---|---|---------|---------|---------|-----------|-----------|-----------|-----------|----------|----------|
| TCONS_00302403    | XLOC_025170       | -             | anti-sense_lincRNA | 1930  | chr9 | 5898144   | 5911432   | - | 2 | 2.81479 | 2.68856 | 2.57352 | 2.68673   | 4.2879    | 3.17984   | 1.62869   | 2.87931  | 2.98547  |
| TCONS_00295288    | XLOC_025176       | -             | lincRNA            | 2917  | chr9 | 11088612  | 11194546  | - | 4 | 1.35207 | 2.06124 | 0.41005 | 0.347151  | 0.495165  | 0.568075  | 0.842706  | 0.186568 | 0.593101 |
| TCONS_00294386    | XLOC_025176       | -             | lincRNA            | 2795  | chr9 | 11162218  | 11194402  | - | 3 | 5.50772 | 1.49768 | 1.92389 | 0.390411  | 0.643236  | 0.7096    | 1.29171   | 0.652816 | 0.934786 |
| TCONS_00299811    | XLOC_025176       | -             | lincRNA            | 418   | chr9 | 11172061  | 11194381  | - | 2 | 7.89778 | 4.87331 | 5.41508 | 0.718024  | 0.556731  | 1.25819   | 2.02323   | 1.76246  | 1.90274  |
| TCONS_00302412    | XLOC_025184       | -             | lincRNA            | 369   | chr9 | 13432439  | 13433213  | - | 2 | 0.59652 | 0.86051 | 0       | 3.82277   | 0.749558  | 0         | 1.10561   | 1.5001   | 1.0552   |
| TCONS_00299817    | XLOC_025185       | -             | lincRNA            | 288   | chr9 | 13939889  | 13942844  | - | 3 | 0       | 0       | 0.84753 | 0         | 0.725074  | 3.22092   | 0.732346  | 0.981594 | 0.679769 |
| TCONS_00296888    | XLOC_025185       | -             | lincRNA            | 515   | chr9 | 13994010  | 14018321  | - | 4 | 2.2552  | 0.91087 | 2.49351 | 1.22528   | 1.38717   | 0         | 1.34021   | 0.523617 | 0.186039 |
| ENST00000416996.1 | ENSG00000225472.1 | RP11-120J1.1  | intronic_lincRNA   | 964   | chr9 | 14317084  | 14357853  | + | 2 | 2.26717 | 1.20814 | 2.20687 | 0.672168  | 1.5359    | 1.56834   | 2.31435   | 1.69686  | 1.21453  |
| TCONS_00294876    | XLOC_024646       | -             | intronic_lincRNA   | 1492  | chr9 | 15885366  | 15886958  | + | 2 | 2.84227 | 0.9315  | 1.62295 | 0.743464  | 0.905462  | 1.30745   | 0.770464  | 0.998374 | 1.02933  |
| TCONS_00295727    | XLOC_024647       | -             | lincRNA            | 513   | chr9 | 16035406  | 16060801  | + | 4 | 0.97265 | 1.60438 | 0.22817 | 0.411052  | 0.398913  | 0.905175  | 0.19273   | 0.790596 | 0.187249 |
| TCONS_00299826    | XLOC_025193       | -             | intronic_lincRNA   | 6161  | chr9 | 16682057  | 16689147  | - | 2 | 5.14033 | 3.43272 | 3.09068 | 4.13121   | 3.0057    | 2.56998   | 2.36953   | 2.46096  | 1.96247  |
| TCONS_00293958    | XLOC_024659       | -             | lincRNA            | 1061  | chr9 | 22653261  | 22654695  | + | 2 | 1.89401 | 0.1648  | 0.32583 | 0.223289  | 0.0716696 | 0.327321  | 0.204991  | 0.563852 | 0.134602 |
| TCONS_00295309    | XLOC_025212       | -             | lincRNA            | 1099  | chr9 | 23659436  | 23663682  | - | 2 | 1.02046 | 1.02561 | 0.46789 | 0.213831  | 2.05863   | 1.72395   | 0.850238  | 0.539769 | 0.386633 |
| TCONS_00299833    | XLOC_025212       | -             | lincRNA            | 3109  | chr9 | 23671120  | 23675643  | - | 2 | 1.15823 | 0.72837 | 1.00532 | 0.373925  | 1.43576   | 1.93347   | 0.800969  | 0.579645 | 0.277609 |
| TCONS_00292709    | XLOC_024669       | -             | lincRNA            | 514   | chr9 | 27701996  | 27703296  | + | 2 | 1.61595 | 1.82764 | 0.22743 | 0         | 0.39762   | 0.225567  | 0         | 0.262668 | 0        |
| TCONS_00297708    | XLOC_025227       | -             | anti-sense_lincRNA | 1643  | chr9 | 32449996  | 32452924  | - | 2 | 2.33318 | 0.98077 | 1.7425  | 1.0649    | 1.32213   | 1.60929   | 0.567545  | 0.669917 | 2.00261  |
| TCONS_00293308    | XLOC_025228       | -             | lincRNA            | 1831  | chr9 | 32885457  | 32891890  | - | 2 | 1.18871 | 0.52041 | 0.77028 | 0.392506  | 0.98062   | 0.90586   | 1.2541    | 0.592254 | 0.850075 |
| TCONS_00298122    | XLOC_024682       | -             | lincRNA            | 402   | chr9 | 33603363  | 33605224  | + | 2 | 1.0007  | 1.07518 | 0       | 0.31943   | 0.624117  | 0.704265  | 0.305006  | 0        | 1.46452  |
| TCONS_00302451    | XLOC_025260       | -             | lincRNA            | 403   | chr9 | 35592753  | 35605117  | - | 2 | 0.99583 | 0.71317 | 1.78564 | 0         | 0.931445  | 0.350379  | 0.910251  | 0        | 0.582848 |
| ENST00000574939.1 | ENSG00000227388.2 | RP11-112J3.16 | lincRNA            | 546   | chr9 | 35772160  | 35780595  | + | 2 | 1.76092 | 0.62099 | 0.4117  | 0.371637  | 0.540361  | 1.02275   | 0.521089  | 1.42628  | 0.507308 |
| TCONS_00294490    | XLOC_025290       | -             | lincRNA            | 672   | chr9 | 40724860  | 40750172  | - | 3 | 10.8326 | 7.96769 | 5.67374 | 0.272032  | 2.14918   | 1.19715   | 3.59367   | 1.44441  | 5.31471  |
| TCONS_00293389    | XLOC_025290       | -             | lincRNA            | 1407  | chr9 | 40729404  | 40750347  | - | 2 | 1.32933 | 0.19172 | 0.18195 | 0         | 0.0842333 | 0         | 0.0731125 | 0.110269 | 0.620091 |
| TCONS_00296184    | XLOC_025292       | -             | lincRNA            | 329   | chr9 | 41948714  | 41954668  | - | 2 | 3.10631 | 2.26762 | 4.01279 | 2.00421   | 1.97733   | 4.42707   | 4.42124   | 3.31676  | 0.927602 |
| TCONS_00296186    | XLOC_025308       | -             | lincRNA            | 390   | chr9 | 67332461  | 67340114  | - | 4 | 3.18919 | 4.19755 | 3.061   | 2.03855   | 2.65841   | 1.87311   | 2.92894   | 2.21182  | 1.87136  |
| TCONS_00294953    | XLOC_024750       | -             | anti-sense_lincRNA | 6915  | chr9 | 68745857  | 68754821  | + | 2 | 3.95488 | 3.48825 | 2.55686 | 1.66691   | 1.74511   | 1.24529   | 1.60969   | 1.56359  | 3.09772  |
| TCONS_00297345    | XLOC_024751       | -             | lincRNA            | 886   | chr9 | 69450012  | 69451050  | + | 2 | 1.03936 | 0.93227 | 1.23009 | 0.84122   | 0.18021   | 0.925062  | 0.25822   | 0.473115 | 0.423048 |
| TCONS_00296190    | XLOC_025321       | -             | lincRNA            | 1969  | chr9 | 70502782  | 70505072  | - | 2 | 5.1343  | 1.71887 | 3.31283 | 1.33886   | 2.22492   | 3.77779   | 1.3537    | 2.72904  | 2.93832  |
| TCONS_00302202    | XLOC_024756       | -             | lincRNA            | 1709  | chr9 | 70920915  | 70927789  | + | 2 | 1.21706 | 0.75018 | 0       | 0.0848557 | 0.0407769 | 0.0466297 | 0.348764  | 0.106739 | 0.344646 |
| TCONS_00300585    | XLOC_025325       | -             | intronic_lincRNA   | 1603  | chr9 | 71568724  | 71590858  | - | 3 | 0.9453  | 1.5637  | 0.94604 | 2.09933   | 1.53546   | 1.75557   | 1.41796   | 1.14857  | 0.90637  |
| TCONS_00297361    | XLOC_024773       | -             | lincRNA            | 1955  | chr9 | 74954945  | 74960941  | + | 2 | 3.7215  | 0.80587 | 2.66356 | 1.82372   | 3.18888   | 2.28478   | 0.98772   | 0.596034 | 0.954369 |
| TCONS_00302212    | XLOC_024774       | -             | lincRNA            | 456   | chr9 | 75093177  | 75094501  | + | 2 | 0.39578 | 0.2813  | 0.56146 | 0         | 0         | 0.277175  | 0.950787  | 0.324354 | 0.22984  |
| TCONS_00295395    | XLOC_025338       | -             | intronic_lincRNA   | 958   | chr9 | 75138421  | 75143020  | - | 3 | 1.88182 | 1.21777 | 1.11188 | 0.507411  | 0.325927  | 0.371951  | 1.08872   | 0.427616 | 1.30073  |
| TCONS_00302479    | XLOC_025340       | -             | lincRNA            | 1300  | chr9 | 75485873  | 75487967  | - | 2 | 2.87388 | 3.86434 | 2.48106 | 0.524073  | 2.01661   | 2.56034   | 1.17303   | 1.39427  | 0.420836 |
| TCONS_00301236    | XLOC_025348       | -             | intronic_lincRNA   | 510   | chr9 | 78833517  | 78834173  | - | 2 | 0       | 0.46291 | 0       | 0         | 0.402844  | 1.14251   | 0.194669  | 0.26616  | 0        |
| TCONS_00295823    | XLOC_024785       | -             | lincRNA            | 1404  | chr9 | 79131018  | 79179942  | + | 3 | 0.79437 | 1.2103  | 1.41997 | 1.81767   | 1.01996   | 1.74146   | 0.469697  | 0.859061 | 1.73936  |
| TCONS_00294066    | XLOC_024785       | -             | lincRNA            | 832   | chr9 | 79167592  | 79179568  | + | 2 | 1.55045 | 0.83514 | 1.064   | 0.895912  | 1.18052   | 1.69803   | 0.126213  | 0.793986 | 0.991926 |
| TCONS_00299614    | XLOC_024794       | -             | lincRNA            | 7010  | chr9 | 83232730  | 83260278  | + | 3 | 0.29998 | 0.14504 | 0.4287  | 0.422653  | 0.360366  | 0.784215  | 0.2304    | 0.812064 | 2.18297  |
| TCONS_00292835    | XLOC_024796       | -             | lincRNA            | 612   | chr9 | 84304754  | 84354258  | + | 2 | 3.20729 | 0.69358 | 0.86081 | 0.935491  | 1.65952   | 1.02945   | 1.88552   | 0.933792 | 0.708231 |
| TCONS_00300995    | XLOC_024796       | -             | lincRNA            | 547   | chr9 | 84354245  | 84363401  | + | 2 | 0.58529 | 0       | 0.20524 | 0.37056   | 0.897963  | 0.61187   | 0.519534  | 2.13308  | 0.168608 |
| TCONS_00295412    | XLOC_025360       | -             | lincRNA            | 277   | chr9 | 85733097  | 85834149  | - | 3 | 0       | 3.76427 | 0       | 5.76815   | 4.12118   | 0.912821  | 0.837145  | 0        | 6.95231  |
| TCONS_00299616    | XLOC_024801       | -             | lincRNA            | 2918  | chr9 | 85844535  | 85847512  | + | 2 | 3.00499 | 1.01356 | 2.28051 | 0.423762  | 1.53686   | 0.95713   | 0.45019   | 1.06374  | 0.955149 |
| TCONS_00296651    | XLOC_024802       | -             | intronic_lincRNA   | 689   | chr9 | 85902164  | 85903189  | + | 2 | 1.04018 | 0.29157 | 2.16837 | 0.262539  | 0.634153  | 0.288828  | 0.729751  | 0.333708 | 0.357259 |
| TCONS_00295430    | XLOC_025373       | -             | lincRNA            | 1251  | chr9 | 88416541  | 88418399  | - | 2 | 1.94039 | 0.80909 | 1.13233 | 0         | 0.527786  | 0.402001  | 1.34003   | 0.99885  | 0.33042  |
| TCONS_00299625    | XLOC_024811       | -             | lincRNA            | 4367  | chr9 | 89599938  | 89605490  | + | 2 | 2.76934 | 1.21966 | 2.42074 | 0.767611  | 1.88559   | 2.10844   | 1.17276   | 1.27053  | 0.304368 |
| ENST00000425666.1 | ENSG00000231107.1 | RP11-389K14.3 | lincRNA            | 1013  | chr9 | 93063184  | 93195771  | - | 3 | 0.37604 | 0.92944 | 1.02357 | 0.315336  | 0.907511  | 1.0318    | 0.252163  | 0.49794  | 1.28E-06 |
| TCONS_00293478    | XLOC_025389       | -             | lincRNA            | 592   | chr9 | 93145530  | 93195830  | - | 2 | 0.7777  | 0.79382 | 0.56919 | 0.163908  | 0.642343  | 0.378103  | 1.30052   | 0.836579 | 0.148974 |
| ENST00000445280.1 | ENSG00000227603.1 | RP11-165J3.6  | lincRNA            | 691   | chr9 | 96197614  | 96199403  | - | 2 | 1.65754 | 1.45185 | 1.58354 | 0.392198  | 1.642     | 0.431468  | 1.33229   | 1.16313  | 2.13472  |
| TCONS_00299643    | XLOC_024848       | -             | lincRNA            | 232   | chr9 | 96738680  | 96742734  | + | 3 | 0       | 0       | 0       | 0         | 1.66909   | 0         | 0         | 0        | 0        |
| TCONS_00301283    | XLOC_025448       | -             | lincRNA            | 621   | chr9 | 102567720 | 102582169 | - | 2 | 7.24403 | 1.01784 | 1.51563 | 0.915403  | 2.36154   | 2.68616   | 1.84403   | 1.74972  | 0.692889 |
| TCONS_00299956    | XLOC_025449       | -             | lincRNA            | 1133  | chr9 | 102647893 | 102657209 | - | 2 | 1.63892 | 0.38001 | 0.82623 | 0.274697  | 1.3221    | 0.528483  | 0.440919  | 1.47305  | 0.682841 |
| TCONS_00295485    | XLOC_025464       | -             | lincRNA            | 281   | chr9 | 106723029 | 106740798 | - | 3 | 1.20213 | 7.17876 | 0       | 0.786344  | 0         | 0         | 1.59224   | 0        | 0        |
| TCONS_00296316    | XLOC_025465       | -             | lincRNA            | 1827  | chr9 | 106839583 | 106854799 | - | 4 | 1.18684 | 1.76131 | 0.71288 | 0.0313825 | 0.260358  | 0.238645  | 1.16207   | 0.036873 | 0        |
| TCONS_00293562    | XLOC_025465       | -             | lincRNA            | 11650 | chr9 | 106839619 | 106856263 | - | 3 | 4.49733 | 2.70713 | 2.76914 | 0.319506  | 0.830863  | 0.70861   | 1.10383   | 0.568447 | 0.865277 |
| TCONS_00298531    | XLOC_025468       | -             | lincRNA            | 299   | chr9 | 109880371 | 109884051 | - | 2 | 0       | 0       | 0       | 1.29986   | 0         | 0.718865  | 0.648918  | 0        | 0.605521 |
| TCONS_00299961    | XLOC_025470       | -             | lincRNA            | 211   | chr9 | 109951886 | 109953368 | - | 2 | 0       | 3.00169 | 0       | 0         | 2.69802   | 0         | 0         | 3.7552   | 2.51662  |
| TCONS_00295084    | XLOC_024896       | -             | lincRNA            | 787   | chr9 | 109984462 | 109991512 | + | 2 | 3.05795 | 2.66681 | 5.64271 | 0.218567  | 1.37085   | 0.120197  | 1.10984   | 1.10839  | 1.2872   |
| TCONS_00292943    | XLOC_024896       | -             | lincRNA            | 682   | chr9 | 109991243 | 109994429 | + | 2 | 2.8212  | 0.44378 | 1.90705 | 0.532733  | 0.514778  | 0.146523  | 0         | 0.507975 | 0.845852 |
| TCONS_00301976    | XLOC_025474       | -             | lincRNA            | 2606  | chr9 | 111075422 | 111402389 | - | 3 | 0.78896 | 0.61986 | 1.23281 | 0.420011  | 1.39794   | 0.500323  | 1.18871   | 1.16333  | 2.68503  |
| TCONS_00294628    | XLOC_025474       | -             | lincRNA            | 902   | chr9 | 111137336 | 111402482 | - | 2 | 1.21965 | 1.20357 | 2.84688 | 0.475726  | 0.99142   | 0.590668  | 2.60167   | 2.6766   | 4.79881  |
| TCONS_00301303    | XLOC_025491       | -             | lincRNA            | 460   | chr9 | 113875831 | 114047167 | - | 3 | 0       | 0.8804  | 2.53889 | 3.19118   | 1.55684   | 5         |           |          |          |

|                   |                   |               |                    |      |      |           |           |   |   |         |         |         |           |           |           |           |          |           |
|-------------------|-------------------|---------------|--------------------|------|------|-----------|-----------|---|---|---------|---------|---------|-----------|-----------|-----------|-----------|----------|-----------|
| TCONS_00297087    | XLOC_025498       | -             | lincRNA            | 1159 | chr9 | 114617179 | 114658794 | - | 3 | 0.74414 | 0.44358 | 0.94974 | 0.0668086 | 0.385813  | 0.0734452 | 1.10266   | 0.421389 | 0.301919  |
| TCONS_00296722    | XLOC_024916       | -             | intronic_lincRNA   | 345  | chr9 | 115642635 | 115643812 | + | 2 | 0       | 0       | 2.0298  | 0.445831  | 0.438596  | 0.984238  | 0.8676    | 0        | 0         |
| TCONS_00297106    | XLOC_025520       | -             | intronic_lincRNA   | 4979 | chr9 | 117177598 | 117183477 | - | 3 | 4.01764 | 1.77216 | 1.97919 | 1.1913    | 1.90068   | 2.25006   | 1.20473   | 1.59414  | 1.85742   |
| TCONS_00293640    | XLOC_025525       | -             | intronic_lincRNA   | 6270 | chr9 | 118010811 | 118025078 | - | 2 | 4.91344 | 3.67326 | 3.51614 | 0.569034  | 1.10183   | 1.15771   | 3.33235   | 0.871597 | 1.79429   |
| TCONS_00292982    | XLOC_024939       | -             | intronic_lincRNA   | 5428 | chr9 | 119475169 | 119480930 | + | 2 | 2.18802 | 1.09336 | 0.98427 | 0.624011  | 1.04471   | 1.12918   | 0.923084  | 1.1656   | 0.881936  |
| TCONS_00293644    | XLOC_025531       | -             | lincRNA            | 425  | chr9 | 120562975 | 120576039 | - | 2 | 0.89951 | 0.64189 | 0.6418  | 0.286546  | 0         | 0         | 0.272201  | 2.22519  | 0.262267  |
| TCONS_00297114    | XLOC_025532       | -             | lincRNA            | 2770 | chr9 | 120630916 | 120708728 | - | 4 | 0.73299 | 0.3246  | 1.58921 | 7.79E-06  | 0.346089  | 0.205395  | 0.637055  | 0.590926 | 1.20823   |
| TCONS_00293645    | XLOC_025532       | -             | lincRNA            | 3165 | chr9 | 120630964 | 120638859 | - | 2 | 1.5099  | 0.39401 | 2.19247 | 0.1607    | 1.61749   | 1.25518   | 1.53956   | 1.35792  | 1.98786   |
| TCONS_00301322    | XLOC_025532       | -             | lincRNA            | 1143 | chr9 | 120631813 | 120708076 | - | 3 | 0.40006 | 0.0489  | 0.00015 | 0.105516  | 0.486433  | 1.31143   | 0.0335041 | 0.33841  | 0         |
| TCONS_00301058    | XLOC_024947       | -             | lincRNA            | 885  | chr9 | 123970974 | 123973150 | + | 3 | 0.42745 | 0.42241 | 0.5824  | 0         | 0         | 0         | 0.531092  | 0.664881 | 0.445989  |
| TCONS_00295114    | XLOC_024947       | -             | lincRNA            | 1271 | chr9 | 123971297 | 124028369 | + | 6 | 1.14749 | 0.75324 | 0.54993 | 0.293781  | 1.28901   | 0.283977  | 0.218206  | 0.308422 | 0.535213  |
| TCONS_00298260    | XLOC_024947       | -             | lincRNA            | 1147 | chr9 | 123971350 | 123994085 | + | 4 | 0.86909 | 0.78935 | 0.95539 | 1.08847   | 0.494842  | 0.94317   | 0.425358  | 1.22024  | 0.417794  |
| TCONS_00297992    | XLOC_025549       | -             | lincRNA            | 513  | chr9 | 124241556 | 124262384 | - | 2 | 1.29686 | 2.52117 | 2.73807 | 2.05526   | 1.19674   | 3.16811   | 3.8546    | 2.37179  | 4.49397   |
| TCONS_00297546    | XLOC_024956       | -             | intronic_lincRNA   | 4078 | chr9 | 126243680 | 126256656 | + | 4 | 0.59892 | 0.48581 | 0.74955 | 0.142909  | 0.0113665 | 0         | 0.616771  | 0.565413 | 0.153994  |
| TCONS_00294239    | XLOC_024956       | -             | intronic_lincRNA   | 4629 | chr9 | 126243680 | 126256656 | + | 3 | 0.6682  | 0.6441  | 0.99964 | 0         | 0.655906  | 0.143313  | 0.806641  | 0.202847 | 0.272213  |
| TCONS_00296743    | XLOC_024956       | -             | intronic_lincRNA   | 1933 | chr9 | 126243776 | 126252047 | + | 2 | 1.03188 | 0.48545 | 0.77248 | 0.119649  | 0.939259  | 0.137083  | 1.76495   | 0.522572 | 0.807552  |
| TCONS_00304412    | XLOC_024956       | -             | intronic_lincRNA   | 4737 | chr9 | 126249600 | 126256345 | + | 2 | 0.60222 | 0       | 0.12857 | 0.0577776 | 0.101291  | 0.117598  | 0.160012  | 0.498764 | 0.603468  |
| TCONS_00300015    | XLOC_025567       | -             | lincRNA            | 245  | chr9 | 127614922 | 127615528 | - | 2 | 0       | 0       | 0       | 0         | 1.31175   | 1.43834   | 0         | 0        | 0         |
| ENST00000454034.1 | ENSG00000233721.1 | RP11-205K6.1  | lincRNA            | 719  | chr9 | 129278696 | 129281087 | + | 2 | 0.78424 | 0.27454 | 2.31299 | 1.23654   | 1.07477   | 0.680123  | 2.0597    | 0.157033 | 0.224257  |
| ENST00000443631.1 | ENSG00000223478.1 | RP11-545E17.3 | anti-sense_lincRNA | 544  | chr9 | 131486724 | 131495473 | + | 2 | 1.47591 | 1.2493  | 2.0708  | 1.86904   | 3.98607   | 3.29198   | 2.79588   | 1.4348   | 3.23194   |
| TCONS_00293093    | XLOC_025010       | -             | lincRNA            | 1315 | chr9 | 132044621 | 132046172 | + | 2 | 0.28553 | 1.29704 | 0.34608 | 0.262518  | 0.681356  | 1.12309   | 0.13041   | 0.531803 | 0.402023  |
| ENST00000455981.1 | ENSG00000224307.1 | RP11-344B5.2  | lincRNA            | 583  | chr9 | 132044737 | 132048007 | + | 3 | 1.02885 | 2.53656 | 2.68703 | 2.42108   | 2.22081   | 2.07079   | 3.05254   | 2.49593  | 3.54672   |
| TCONS_00297590    | XLOC_025012       | -             | lincRNA            | 1357 | chr9 | 132094568 | 132097425 | + | 2 | 1.23406 | 0.61218 | 1.0278  | 0.221428  | 1.11812   | 0.365088  | 0.506652  | 0.418429 | 0.450004  |
| TCONS_00300042    | XLOC_025622       | -             | intronic_lincRNA   | 358  | chr9 | 135555740 | 135558527 | - | 2 | 0.63727 | 0.92191 | 0.4639  | 0         | 1.20481   | 0         | 0.791868  | 0.536555 | 0.753778  |
| TCONS_00293773    | XLOC_025628       | -             | lincRNA            | 968  | chr9 | 136108483 | 136113169 | - | 2 | 1.19403 | 1.10936 | 2.2859  | 0.166929  | 0.723716  | 0.917729  | 1.53473   | 1.47693  | 1.13265   |
| TCONS_00295615    | XLOC_025629       | -             | lincRNA            | 3213 | chr9 | 136125795 | 136130332 | - | 2 | 2.23656 | 1.1251  | 1.8255  | 0.998087  | 4.62715   | 5.25002   | 1.12116   | 1.62543  | 1.34005   |
| TCONS_00296839    | XLOC_025091       | -             | lincRNA            | 279  | chr9 | 138026373 | 138027351 | + | 2 | 0       | 0       | 1.88482 | 0         | 0         | 0         | 0         | 0        | 0         |
| TCONS_00293789    | XLOC_025643       | -             | lincRNA            | 484  | chr9 | 138144291 | 138147251 | - | 2 | 4.99894 | 1.26522 | 1.26099 | 0.453298  | 0.220229  | 0         | 0.21326   | 0.291332 | 0.620226  |
| TCONS_00295239    | XLOC_025100       | -             | lincRNA            | 1779 | chr9 | 138799730 | 138805425 | + | 2 | 4.13575 | 3.18082 | 3.31579 | 1.29743   | 2.45465   | 1.64869   | 3.10972   | 2.49849  | 1.75634   |
| ENST00000563018.1 | ENSG00000260193.1 | RP11-83N9.5   | lincRNA            | 775  | chr9 | 138999951 | 139001270 | - | 2 | 0       | 0       | 0.2452  | 0.111572  | 0.215345  | 0.245433  | 0.515225  | 0.424463 | 0.202204  |
| TCONS_00298639    | XLOC_025661       | -             | lincRNA            | 889  | chr9 | 139535694 | 139538924 | - | 2 | 0.44351 | 0.72191 | 0.71439 | 1.48897   | 0.448547  | 0.716348  | 1.0283    | 0.35327  | 0.0842383 |
| TCONS_00295245    | XLOC_025110       | -             | intronic_lincRNA   | 487  | chr9 | 139703713 | 139704457 | + | 2 | 1.06009 | 2.5035  | 1.2474  | 1.12132   | 1.52518   | 0.987903  | 1.05468   | 1.72943  | 1.22724   |
| TCONS_00293219    | XLOC_025145       | -             | lincRNA            | 1730 | chr9 | 141067697 | 141069916 | + | 2 | 3.40107 | 1.47968 | 1.27777 | 0.125534  | 0.522797  | 1.74757   | 0.573232  | 0.894753 | 1.01969   |
| TCONS_00307366    | XLOC_026145       | -             | lincRNA            | 384  | chrX | 2737281   | 2742413   | - | 2 | 1.64585 | 1.5774  | 0       | 0         | 0.343433  | 0         | 0.336702  | 0.914912 | 0.322334  |
| TCONS_00307372    | XLOC_026151       | -             | lincRNA            | 2870 | chrX | 5635474   | 5644400   | - | 2 | 0.76474 | 1.13764 | 1.01735 | 1.74951   | 1.7026    | 1.6327    | 2.0297    | 1.35367  | 0.885925  |
| TCONS_00307380    | XLOC_026166       | -             | lincRNA            | 1014 | chrX | 11073565  | 11129329  | - | 3 | 0.86537 | 1.62335 | 1.16026 | 0.223429  | 1.10247   | 0.750283  | 0.104379  | 0.869341 | 0.782821  |
| TCONS_00311476    | XLOC_026166       | -             | lincRNA            | 438  | chrX | 11124911  | 11129240  | - | 2 | 0.0373  | 0.1154  | 0.76952 | 0.0439585 | 1.44101   | 1.59118   | 0.399509  | 0.790542 | 0.0018447 |
| TCONS_00308264    | XLOC_025757       | -             | intronic_lincRNA   | 245  | chrX | 19068926  | 19083860  | + | 2 | 11.6642 | 4.45928 | 6.21025 | 6.47289   | 1.31178   | 2.87675   | 2.71694   | 1.80665  | 0         |
| TCONS_00309616    | XLOC_026213       | -             | lincRNA            | 956  | chrX | 23768779  | 23784307  | - | 3 | 0.26954 | 0.46962 | 0.27871 | 1.01751   | 0.490193  | 0.839112  | 0.311898  | 0.750332 | 2.53168   |
| TCONS_00305451    | XLOC_025771       | -             | lincRNA            | 790  | chrX | 26275303  | 26344221  | + | 2 | 1.89807 | 0.36179 | 0       | 0         | 0         | 0         | 0         | 0.551331 | 0         |
| TCONS_00305476    | XLOC_025787       | -             | lincRNA            | 1485 | chrX | 38657745  | 38659715  | + | 2 | 1.58763 | 0.9366  | 0.21758 | 0         | 0.0958333 | 0.0547746 | 0.227853  | 0.313704 | 0.224991  |
| TCONS_00311310    | XLOC_025805       | -             | lincRNA            | 273  | chrX | 42992266  | 43024024  | + | 3 | 1.31826 | 0       | 0       | 0.865099  | 0.86655   | 2.87591   | 0         | 0        | 0         |
| TCONS_00311934    | XLOC_026241       | -             | lincRNA            | 590  | chrX | 45606352  | 45629700  | - | 3 | 0       | 0.46627 | 0       | 0.395526  | 0.232475  | 2.25441   | 0         | 0.562044 | 1.36726   |
| TCONS_00309638    | XLOC_026241       | -             | lincRNA            | 8138 | chrX | 45623977  | 45633259  | - | 2 | 4.68316 | 3.07394 | 3.67869 | 4.26917   | 4.48331   | 3.41279   | 1.67323   | 2.74028  | 2.93475   |
| TCONS_00312338    | XLOC_026241       | -             | lincRNA            | 5267 | chrX | 45624580  | 45630073  | - | 3 | 5.25219 | 4.04914 | 7.04768 | 10.933    | 6.74038   | 6.51508   | 4.30606   | 6.62492  | 4.87408   |
| ENST00000602507.1 | ENSG00000270069.1 | RP6-99M1.2    | lincRNA            | 1758 | chrX | 45627783  | 45629672  | - | 2 | 2.91389 | 4.39686 | 6.06279 | 10.6317   | 5.05021   | 3.35522   | 3.34517   | 6.0069   | 3.524     |
| TCONS_00306033    | XLOC_026241       | -             | lincRNA            | 834  | chrX | 45708333  | 45710220  | - | 2 | 1.5821  | 0.93128 | 1.89202 | 0.355904  | 2.02032   | 0.551456  | 0         | 0.707004 | 1.00384   |
| TCONS_00306034    | XLOC_026241       | -             | lincRNA            | 888  | chrX | 45708333  | 45711097  | - | 2 | 1.65072 | 2.75726 | 1.52897 | 1.90882   | 2.09257   | 1.54169   | 1.02982   | 1.70785  | 1.01591   |
| TCONS_00311319    | XLOC_025819       | -             | lincRNA            | 232  | chrX | 47225694  | 47229977  | + | 2 | 0       | 0       | 0       | 0         | 0         | 1.8212    | 0         | 0        | 0         |
| ENST00000366185.2 | ENSG00000232593.2 | RP11-258C19.5 | lincRNA            | 1063 | chrX | 53123339  | 53171889  | + | 3 | 8.59568 | 5.06855 | 7.02523 | 5.04945   | 4.79066   | 4.4902    | 2.9313    | 4.7273   | 4.23008   |
| TCONS_00308928    | XLOC_025856       | -             | lincRNA            | 626  | chrX | 53123345  | 53129082  | + | 3 | 2.43856 | 1.06318 | 2.75433 | 1.20615   | 1.31256   | 1.65902   | 0.700675  | 2.03189  | 0.958509  |
| TCONS_00312984    | XLOC_025864       | -             | lincRNA            | 8545 | chrX | 55934008  | 56048879  | + | 2 | 3.49101 | 1.82715 | 3.30112 | 2.17322   | 2.45555   | 2.6169    | 1.6716    | 3.37824  | 1.91621   |
| ENST00000452532.1 | ENSG00000227486.1 | RP13-188A5.1  | lincRNA            | 1007 | chrX | 55934556  | 56041606  | + | 2 | 2.87959 | 3.85656 | 3.44317 | 2.17993   | 3.13268   | 2.11358   | 2.47207   | 3.52841  | 1.46824   |
| ENST00000439622.1 | ENSG00000226310.1 | RP3-323P24.3  | lincRNA            | 665  | chrX | 57148095  | 57153676  | + | 2 | 2.33229 | 0.66135 | 2.09186 | 1.02027   | 1.14692   | 1.18419   | 1.78679   | 2.18563  | 0.674505  |
| TCONS_00311344    | XLOC_025868       | -             | lincRNA            | 3531 | chrX | 57148370  | 57157502  | + | 3 | 4.57781 | 1.35008 | 3.30681 | 1.43308   | 2.5699    | 3.5076    | 1.87101   | 2.78438  | 2.74613   |
| TCONS_00305597    | XLOC_025872       | -             | lincRNA            | 1336 | chrX | 64255016  | 64333837  | + | 5 | 3.26575 | 2.97701 | 4.55191 | 3.11241   | 1.6086    | 1.1505    | 6.66912   | 5.86744  | 6.60025   |
| TCONS_00306553    | XLOC_025872       | -             | lincRNA            | 2018 | chrX | 64270526  | 64333837  | + | 4 | 1.70041 | 0.65757 | 1.10042 | 0.275139  | 0.669777  | 0.734476  | 0.256405  | 1.47844  | 0.669533  |
| TCONS_00308361    | XLOC_025872       | -             | lincRNA            | 2425 | chrX | 64271089  | 64328062  | + | 4 | 2.76796 | 4.11388 | 2.61935 | 1.1375    | 1.22043   | 1.99921   | 0.670441  | 2.38047  | 2.16724   |
| TCONS_00307183    | XLOC_025872       | -             | lincRNA            | 2017 | chrX | 64271171  | 64589517  | + | 5 | 1.29168 | 1.54975 | 0.99    | 0.649476  | 1.23032   | 0.511088  | 0.360747  | 0.978302 | 0.81933   |
| ENST00000424241.1 | ENSG00000237311.1 | RP6-159A1.3   | lincRNA            | 857  | chrX | 65219593  | 65220913  | + | 2 | 1.08509 | 0.21639 | 0.74965 | 1.4641    |           |           |           |          |           |



|                   |                   |                |                    |       |            |           |           |   |   |         |         |         |           |           |           |           |           |           |
|-------------------|-------------------|----------------|--------------------|-------|------------|-----------|-----------|---|---|---------|---------|---------|-----------|-----------|-----------|-----------|-----------|-----------|
| ENST00000416330.1 | ENSG00000229807.5 | XIST           | lincRNA            | 750   | chrX       | 73040491  | 73046179  | - | 3 | 76.7966 | 46.9921 | 71.572  | 0.11666   | 0         | 0         | 0         | 62.4685   | 69.051    |
| TCONS_00305647    | XLOC_025911       | -              | lincRNA            | 1699  | chrX       | 74822309  | 74826057  | + | 2 | 1.63356 | 0.236   | 0.46584 | 0.1822    | 0.328401  | 0.375531  | 0.524729  | 0.859647  | 0.308403  |
| TCONS_00308392    | XLOC_025911       | -              | lincRNA            | 2811  | chrX       | 74824547  | 74847035  | + | 2 | 2.55928 | 0.64322 | 1.62732 | 0.50084   | 0.776462  | 0.780956  | 0.637234  | 0.799855  | 0.508236  |
| TCONS_00309485    | XLOC_025911       | -              | lincRNA            | 438   | chrX       | 74824752  | 74875778  | + | 3 | 1.08316 | 0.97774 | 0       | 0.893101  | 0         | 0         | 0         | 0         | 0         |
| TCONS_00307540    | XLOC_026361       | -              | lincRNA            | 1259  | chrX       | 75366767  | 75368854  | - | 2 | 0.57773 | 1.47207 | 0.5288  | 0.544399  | 0.349185  | 0.731421  | 0.277039  | 0.76249   | 0.765125  |
| TCONS_00307219    | XLOC_025922       | -              | lincRNA            | 554   | chrX       | 80065554  | 80067972  | + | 2 | 0.57379 | 0.80898 | 0.60325 | 0.181597  | 1.0559    | 0.799577  | 0.848171  | 1.62538   | 0.991326  |
| TCONS_00311370    | XLOC_025923       | -              | lincRNA            | 17482 | chrX       | 80566443  | 80587754  | + | 2 | 3.09762 | 1.94637 | 2.53597 | 1.64669   | 2.67185   | 2.66672   | 1.59551   | 2.24274   | 2.50269   |
| TCONS_00306605    | XLOC_025925       | -              | lincRNA            | 901   | chrX       | 84057192  | 84093617  | + | 2 | 1.59843 | 0.40541 | 0.80229 | 0.54878   | 0.528967  | 3.21847   | 3.45217   | 2.5457    | 0.413924  |
| TCONS_00306199    | XLOC_026379       | -              | lincRNA            | 509   | chrX       | 90669700  | 90673873  | - | 3 | 2.62706 | 3.25102 | 3.69937 | 1.24921   | 0.606258  | 1.37548   | 5.46907   | 1.60228   | 2.08688   |
| ENST00000445990.1 | ENSG00000234405.1 | LLOXNC01-250H1 | anti-sense_lincRNA | 632   | chrX       | 102752451 | 102755245 | + | 2 | 0.23535 | 0       | 0       | 0         | 0         | 0         | 0.276266  | 0         | 0.135003  |
| TCONS_00313194    | XLOC_026406       | -              | lincRNA            | 2588  | chrX       | 102780032 | 102786934 | - | 4 | 0.89772 | 0.73971 | 0.93369 | 0.294781  | 1.15792   | 0.912858  | 0.708039  | 1.27862   | 0.724966  |
| TCONS_00310224    | XLOC_026407       | -              | lincRNA            | 1210  | chrX       | 102809981 | 102811770 | - | 2 | 2.92753 | 1.68422 | 1.52538 | 1.07829   | 1.58696   | 1.74318   | 1.74385   | 1.03977   | 0.745132  |
| TCONS_00309283    | XLOC_026407       | -              | anti-sense_lincRNA | 761   | chrX       | 102825153 | 102840552 | - | 2 | 1.27006 | 1.01513 | 2.13707 | 0.343096  | 1.6558    | 0.880554  | 1.05673   | 0.145078  | 0.725551  |
| TCONS_00307575    | XLOC_026410       | -              | lincRNA            | 427   | chrX       | 103049585 | 103050998 | - | 2 | 0       | 1.59028 | 0.31797 | 0.284002  | 0         | 0         | 0.539354  | 0.367466  | 0         |
| TCONS_00306933    | XLOC_026415       | -              | intronic_lincRNA   | 3459  | chrX       | 103374549 | 103378631 | - | 2 | 4.71405 | 1.48308 | 3.35918 | 0.923489  | 2.23011   | 2.50037   | 1.59345   | 1.97449   | 2.11609   |
| TCONS_00309730    | XLOC_026415       | -              | intronic_lincRNA   | 1587  | chrX       | 103374589 | 103389457 | - | 2 | 6.51241 | 7.22288 | 6.63493 | 6.73823   | 4.55524   | 5.02748   | 5.39229   | 5.91597   | 4.10175   |
| TCONS_00308436    | XLOC_025988       | -              | lincRNA            | 1097  | chrX       | 107980749 | 107982394 | + | 2 | 0.79545 | 0.39535 | 1.40681 | 0.142872  | 0.618974  | 0.0785365 | 0.0655508 | 0.0901642 | 0         |
| TCONS_00311400    | XLOC_025997       | -              | lincRNA            | 280   | chrX       | 112291384 | 112292121 | + | 2 | 0       | 0       | 2.79283 | 0         | 0         | 2.64295   | 0         | 2.15683   | 1.49004   |
| TCONS_00311623    | XLOC_026432       | -              | lincRNA            | 2466  | chrX       | 113204617 | 113235173 | - | 2 | 0.18019 | 0.15593 | 0.03075 | 0.706056  | 4.93593   | 4.18963   | 0.15442   | 0.532003  | 0.0254698 |
| ENST00000446986.1 | ENSG00000224281.4 | SLC25A5-AS1    | lincRNA            | 1874  | chrX       | 118599997 | 118602225 | - | 2 | 2.31642 | 1.14074 | 1.50078 | 0.535377  | 1.39627   | 1.51295   | 1.53579   | 2.21166   | 1.20774   |
| TCONS_00309535    | XLOC_026016       | -              | lincRNA            | 840   | chrX       | 119125585 | 119127223 | + | 2 | 0.15912 | 0.66657 | 0.10998 | 0.60124   | 1.06303   | 0         | 0.184757  | 0.380716  | 0.362976  |
| TCONS_00309746    | XLOC_026449       | -              | lincRNA            | 581   | chrX       | 119148775 | 119149563 | - | 2 | 0.26668 | 0.37542 | 0       | 2.69863   | 0.979952  | 1.85632   | 0         | 0.215334  | 0         |
| TCONS_00313801    | XLOC_026456       | -              | lincRNA            | 379   | chrX       | 121219661 | 121220936 | - | 2 | 2.25485 | 1.21693 | 2.03596 | 0         | 0.353289  | 1.59159   | 0.693388  | 0.470831  | 2.32105   |
| TCONS_00305795    | XLOC_026030       | -              | lincRNA            | 976   | chrX       | 126272090 | 126273599 | + | 2 | 1.70698 | 0.18297 | 0       | 0.165204  | 0         | 0         | 0.0759332 | 0.730759  | 0.0747261 |
| TCONS_00305796    | XLOC_026031       | -              | lincRNA            | 9171  | chrX       | 128268222 | 128282288 | + | 2 | 2.51679 | 0.59898 | 1.83429 | 0.0926222 | 0.712377  | 0.477348  | 1.18802   | 0.672853  | 0.952324  |
| TCONS_00306683    | XLOC_026031       | -              | lincRNA            | 6832  | chrX       | 128273706 | 128332861 | + | 3 | 3.83452 | 0.01939 | 1.38556 | 0.115813  | 0.858643  | 0.466779  | 1.57311   | 0.624349  | 1.04871   |
| TCONS_00310719    | XLOC_026472       | -              | lincRNA            | 410   | chrX       | 128809923 | 128812442 | - | 2 | 0.96303 | 0.68884 | 0.34475 | 0.307171  | 1.19949   | 0.677152  | 1.17096   | 1.59395   | 1.12588   |
| TCONS_00309544    | XLOC_026038       | -              | lincRNA            | 312   | chrX       | 129115120 | 129115770 | + | 2 | 0       | 0       | 0       | 2.305     | 0         | 0         | 0         | 0         | 0.535236  |
| TCONS_00307620    | XLOC_026482       | -              | lincRNA            | 412   | chrX       | 130883159 | 130889709 | - | 2 | 0       | 2.38767 | 0.68274 | 1.21701   | 0.890918  | 2.68278   | 1.44913   | 1.57828   | 1.39375   |
| TCONS_00307322    | XLOC_026065       | -              | lincRNA            | 916   | chrX       | 135991597 | 136007978 | + | 2 | 2.70326 | 2.18266 | 2.25765 | 1.16405   | 1.63969   | 1.77232   | 1.73051   | 1.81212   | 2.91733   |
| TCONS_00306709    | XLOC_026071       | -              | anti-sense_lincRNA | 1866  | chrX       | 139865127 | 139867176 | + | 2 | 4.65506 | 6.19815 | 1.5918  | 1.6907    | 0.627659  | 1.09794   | 0.140292  | 0.144935  | 0.416078  |
| TCONS_00308797    | XLOC_026515       | -              | lincRNA            | 1895  | chrX       | 148615169 | 148617874 | - | 2 | 3.43164 | 4.42278 | 2.676   | 2.34155   | 1.92323   | 1.45267   | 1.27534   | 1.7093    | 1.97652   |
| TCONS_00313241    | XLOC_026517       | -              | intronic_lincRNA   | 2262  | chrX       | 148686564 | 148688957 | - | 2 | 3.564   | 1.85104 | 2.06244 | 0.993271  | 2.92148   | 1.94418   | 2.00915   | 2.14454   | 1.84776   |
| TCONS_00313672    | XLOC_026080       | -              | lincRNA            | 1850  | chrX       | 149165688 | 149168762 | + | 2 | 12.1833 | 6.12985 | 7.57134 | 2.21149   | 4.62276   | 4.86081   | 4.53321   | 5.02464   | 4.16625   |
| TCONS_00309563    | XLOC_026081       | -              | lincRNA            | 789   | chrX       | 149281702 | 149282795 | + | 2 | 0.86422 | 0.96643 | 0.71786 | 0.435645  | 0         | 0.359361  | 0.402178  | 0.13807   | 1.08544   |
| TCONS_00307338    | XLOC_026091       | -              | intronic_lincRNA   | 322   | chrX       | 151284687 | 151285187 | + | 2 | 0       | 1.19975 | 0       | 0.5296    | 0.523242  | 0         | 0         | 0         | 0.490894  |
| TCONS_00307343    | XLOC_026098       | -              | lincRNA            | 313   | chrX       | 152201059 | 152204172 | + | 2 | 0       | 2.59204 | 0       | 1.14247   | 0         | 0         | 0         | 0.761161  | 1.59139   |
| TCONS_00313247    | XLOC_026529       | -              | lincRNA            | 382   | chrX       | 152951862 | 152952405 | - | 2 | 0.55456 | 0       | 0       | 0         | 1.38924   | 0.391269  | 0         | 1.38814   | 0.65194   |
| TCONS_00306401    | XLOC_026549       | -              | lincRNA            | 695   | chrX       | 153652624 | 153656823 | - | 2 | 5.13812 | 4.89595 | 6.71038 | 3.2418    | 3.50771   | 4.42229   | 9.12868   | 4.4494    | 5.52845   |
| TCONS_00311691    | XLOC_026562       | -              | lincRNA            | 1342  | chrX       | 154581215 | 154585106 | - | 2 | 1.25024 | 0.2481  | 0.42881 | 0.504767  | 0.0539466 | 1.23298   | 0.0513378 | 0.494632  | 0.405283  |
| TCONS_00313830    | XLOC_026563       | -              | lincRNA            | 550   | chrX       | 154644967 | 154686728 | - | 3 | 0.96585 | 0.78113 | 2.22607 | 1.13326   | 0.80602   | 1.20595   | 2.37398   | 0.0002017 | 2.04342   |
| TCONS_00307691    | XLOC_026563       | -              | lincRNA            | 847   | chrX       | 154645220 | 154649838 | - | 2 | 0.78571 | 0.94388 | 1.31854 | 0.743499  | 0.409452  | 0.173836  | 0.290872  | 1.00399   | 1.00689   |
| TCONS_00306419    | XLOC_026563       | -              | lincRNA            | 748   | chrX       | 154648506 | 154651247 | - | 2 | 0.68337 | 0.33679 | 1.40787 | 0.272731  | 0.473477  | 0.443169  | 0.539573  | 0         | 0.483522  |
| ENST00000426699.1 | ENSG00000229308.1 | AC010084.1     | lincRNA            | 559   | chrY       | 3904538   | 3968361   | + | 2 | 0       | 1.3957  | 0       | 4.65541   | 1.04096   | 2.16799   | 6.35324   | 0         | 0         |
| TCONS_00314327    | XLOC_026577       | -              | lincRNA            | 346   | chrY       | 7655401   | 7658396   | + | 2 | 0       | 0       | 0       | 2.21386   | 0         | 0         | 0.430637  | 0         | 0         |
| TCONS_00314598    | XLOC_026580       | -              | lincRNA            | 3111  | chrY       | 14366587  | 14372642  | + | 2 | 0       | 0.48525 | 0       | 1.25289   | 1.39257   | 3.33294   | 4.06211   | 0         | 0         |
| TCONS_00314292    | XLOC_026588       | -              | lincRNA            | 2851  | chrY       | 15978987  | 15999800  | + | 3 | 0       | 1.35728 | 0       | 1.46615   | 1.8337    | 2.00804   | 0.86102   | 0         | 0         |
| TCONS_00314337    | XLOC_026588       | -              | lincRNA            | 1225  | chrY       | 15980822  | 15984550  | + | 2 | 0       | 0.76502 | 0       | 0.89117   | 0.834153  | 0.706961  | 0.505703  | 0         | 0         |
| TCONS_00314606    | XLOC_026588       | -              | lincRNA            | 1572  | chrY       | 15999939  | 16020127  | + | 3 | 0       | 2.37297 | 0       | 2.24017   | 2.54906   | 2.41085   | 1.85873   | 0         | 0         |
| TCONS_00314293    | XLOC_026588       | -              | lincRNA            | 427   | chrY       | 16014498  | 16020127  | + | 2 | 0       | 0       | 0       | 0         | 0.604826  | 0.312962  | 2.00223   | 0         | 0         |
| TCONS_00314309    | XLOC_026611       | -              | lincRNA            | 1578  | chrY       | 21093648  | 21095740  | - | 2 | 0       | 2.87621 | 0       | 1.5334    | 2.32281   | 2.8089    | 0.891828  | 0         | 0         |
| TCONS_00314614    | XLOC_026613       | -              | lincRNA            | 3674  | chrY       | 21202955  | 21207174  | - | 2 | 0       | 3.31285 | 0       | 2.50463   | 1.99723   | 2.54958   | 1.64211   | 0         | 0         |
| TCONS_00314262    | XLOC_026617       | -              | lincRNA            | 250   | chrY       | 22539067  | 22539973  | - | 2 | 0       | 4.10865 | 0       | 1.19356   | 1.2067    | 0         | 1.24547   | 0         | 0         |
| TCONS_00314342    | XLOC_026594       | -              | lincRNA            | 646   | chrY       | 23388378  | 23390599  | + | 2 | 0       | 0       | 0       | 2.04217   | 0         | 1.21E-05  | 0.266762  | 0         | 0         |
| TCONS_00314343    | XLOC_026594       | -              | lincRNA            | 671   | chrY       | 23389752  | 23390599  | + | 2 | 0       | 0.15142 | 0       | 1.2017    | 0.263473  | 0.899772  | 0.0005595 | 0         | 0         |
| TCONS_00000027    | XLOC_000004       | -              | lincRNA            | 451   | GL000192.1 | 511245    | 519419    | + | 2 | 0.40359 | 0.57403 | 1.14606 | 0         | 0.24983   | 0         | 0.24266   | 1.32421   | 1.17259   |
| TCONS_00000087    | XLOC_000020       | -              | lincRNA            | 656   | GL000193.1 | 88632     | 92105     | + | 2 | 6.37795 | 1.6869  | 0.57928 | 0.281617  | 0.0002303 | 0.774626  | 1.73879   | 2.13949   | 0.511242  |
| TCONS_00000088    | XLOC_000020       | -              | lincRNA            | 620   | GL000193.1 | 90077     | 92105     | + | 2 | 1.79156 | 0.20721 | 0.21408 | 0.305864  | 0.147702  | 0.168287  | 0.525105  | 1.18093   | 0.972385  |
| TCONS_00000106    | XLOC_000024       | -              | lincRNA            | 586   | GL000195.1 | 174109    | 176856    | + | 2 | 3.94862 | 2.59338 | 6.62499 | 4.66112   | 2.90121   | 0.732844  | 5.27416   | 4.24952   | 5.2964    |
| TCONS_00000123    | XLOC_000026       | -              | lincRNA            | 2415  | GL000198.1 | 69092     | 72108     | + | 2 | 2.99547 | 1.49953 | 0.94397 | 0.346717  | 0.277465  | 0.126999  | 0.789975  | 1.05232   | 0.625385  |
| TCONS_00000172    | XLOC_000042       | -              | lincRNA            | 1923  | GL000214.1 | 121337    | 135553    | - | 2 | 11.0162 | 4.2686  | 1.70086 | 0.743049  | 0.856695  | 0.408294  | 2.2038    | 8.73381   | 1.60908   |

|                |             |   |         |      |            |        |        |   |   |         |         |         |          |          |          |          |          |          |
|----------------|-------------|---|---------|------|------------|--------|--------|---|---|---------|---------|---------|----------|----------|----------|----------|----------|----------|
| TCONS_00000176 | XLOC_000038 | - | lincRNA | 284  | GL000214.1 | 125633 | 131908 | + | 2 | 10.4697 | 4.33441 | 0       | 0.760092 | 0        | 0.841551 | 3.07049  | 15.4194  | 4.26624  |
| TCONS_00000222 | XLOC_000045 | - | lincRNA | 2791 | GL000219.1 | 51516  | 55892  | - | 2 | 9.08632 | 5.14438 | 7.02166 | 5.4836   | 6.74197  | 3.86114  | 5.37692  | 2.85294  | 1.62442  |
| TCONS_00000210 | XLOC_000045 | - | lincRNA | 2002 | GL000219.1 | 54017  | 56093  | - | 2 | 3.25046 | 2.83782 | 2.62535 | 2.62742  | 3.77645  | 1.8238   | 1.78099  | 0.668614 | 1.02721  |
| TCONS_00000209 | XLOC_000044 | - | lincRNA | 4800 | GL000219.1 | 114470 | 121823 | + | 2 | 1.64292 | 0.8132  | 2.97869 | 0.31985  | 0.76054  | 0.336135 | 0.834491 | 0.401    | 0.162904 |
| TCONS_00000272 | XLOC_000056 | - | lincRNA | 696  | GL000224.1 | 1255   | 14576  | + | 2 | 6.76871 | 5.60449 | 1.99474 | 1.03528  | 0.37506  | 0.711827 | 1.67812  | 2.30236  | 2.34774  |
| TCONS_00000276 | XLOC_000058 | - | lincRNA | 1132 | GL000224.1 | 1272   | 15029  | - | 2 | 9.29717 | 3.80417 | 1.95503 | 0.824976 | 0.992645 | 0.302315 | 1.82865  | 4.51069  | 2.11288  |

**Table S3. Differentially expressed lncRNA and mRNA transcripts for ECRSwNP vs CTRL.**

| Transcript ID     | Gene ID           | Gene name  | Length | ECRSwNP FPKM | CTRL FPKM | log <sub>2</sub> (foldchange) | P value  | Q value    |
|-------------------|-------------------|------------|--------|--------------|-----------|-------------------------------|----------|------------|
| NM_022136.3       | 64092             | SAMSN1     | 1888   | 74.1493      | 12.2431   | 2.59847                       | 5.00E-05 | 0.00170056 |
| NM_003248.4       | 7060              | THBS4      | 3223   | 1.12346      | 10.474    | -3.22079                      | 5.00E-05 | 0.00170056 |
| NM_001242699.1    | 387712            | ENO4       | 2865   | 1.8675       | 5.50671   | -1.56008                      | 5.00E-05 | 0.00170056 |
| NM_014685.2       | 9709              | HERPUD1    | 2176   | 111.498      | 49.9015   | 1.15986                       | 5.00E-05 | 0.00170056 |
| NM_153614.2       | 374407            | DNAJB13    | 1875   | 2.36469      | 8.23567   | -1.80024                      | 5.00E-05 | 0.00170056 |
| NM_003364.2       | 7378              | UPP1       | 1777   | 4.91896      | 1.01749   | 2.27333                       | 5.00E-05 | 0.00170056 |
| NM_003467.2       | 7852              | CXCR4      | 1674   | 139.662      | 37.9932   | 1.87813                       | 5.00E-05 | 0.00170056 |
| NM_003608.3       | 8477              | GPR65      | 4522   | 18.477       | 4.10697   | 2.16958                       | 5.00E-05 | 0.00170056 |
| NM_003670.2       | 8553              | BHLHE40    | 3035   | 98.1131      | 23.8213   | 2.04219                       | 5.00E-05 | 0.00170056 |
| NM_001454.3       | 2302              | FOXJ1      | 2641   | 19.355       | 60.2567   | -1.63842                      | 5.00E-05 | 0.00170056 |
| NM_005097.2       | 9211              | LGI1       | 2366   | 2.39658      | 0.473709  | 2.33890                       | 5.00E-05 | 0.00170056 |
| NM_001040272.5    | 92949             | ADAMTSL1   | 7843   | 1.25487      | 5.358     | -2.09416                      | 5.00E-05 | 0.00170056 |
| NM_182911.3       | 80705             | TSGA10     | 3664   | 6.51924      | 20.1705   | -1.62947                      | 5.00E-05 | 0.00170056 |
| NM_000789.3       | 1636              | ACE        | 4969   | 6.38162      | 2.14659   | 1.57188                       | 5.00E-05 | 0.00170056 |
| NM_016206.2       | 389136            | VGLL3      | 10396  | 20.62        | 6.58233   | 1.64737                       | 5.00E-05 | 0.00170056 |
| NM_021155.3       | 30835             | CD209      | 4328   | 10.654       | 1.76931   | 2.59013                       | 5.00E-05 | 0.00170056 |
| NM_000527.4       | 3949              | LDLR       | 5284   | 15.7748      | 5.65941   | 1.47889                       | 5.00E-05 | 0.00170056 |
| NM_001099772.1    | 1580              | CYP4B1     | 2158   | 41.2942      | 128.138   | -1.63369                      | 5.00E-05 | 0.00170056 |
| NM_145000.3       | 202151            | RANBP3L    | 2543   | 0.511382     | 2.49278   | -2.28528                      | 5.00E-05 | 0.00170056 |
| NM_194071.2       | 64764             | CREB3L2    | 7455   | 33.1735      | 14.7643   | 1.16792                       | 5.00E-05 | 0.00170056 |
| NM_003974.2       | 9046              | DOK2       | 1770   | 9.87414      | 3.05875   | 1.69072                       | 5.00E-05 | 0.00170056 |
| NM_130435.3       | 5791              | PTPRE      | 5039   | 19.0631      | 5.41947   | 1.81456                       | 5.00E-05 | 0.00170056 |
| NM_018897.2       | 56171             | DNAH7      | 12394  | 9.65151      | 44.9611   | -2.21985                      | 5.00E-05 | 0.00170056 |
| NM_003407.2       | 7538              | ZFP36      | 1745   | 45.3106      | 4.80738   | 3.23653                       | 5.00E-05 | 0.00170056 |
| NM_032131.4       | 84071             | ARMC2      | 3413   | 6.61246      | 18.9244   | -1.51698                      | 5.00E-05 | 0.00170056 |
| NM_178171.4       | 284110            | GSDMA      | 2164   | 2.54552      | 0.312455  | 3.02624                       | 5.00E-05 | 0.00170056 |
| NM_033124.4       | 85478             | CCDC65     | 1815   | 11.1135      | 31.3423   | -1.49580                      | 5.00E-05 | 0.00170056 |
| NM_144980.3       | 168090            | C6orf118   | 1839   | 6.11382      | 25.5535   | -2.06337                      | 5.00E-05 | 0.00170056 |
| NM_000389.4       | 1026              | CDKN1A     | 2159   | 27.6653      | 8.91486   | 1.63379                       | 5.00E-05 | 0.00170056 |
| NM_000395.2       | 1439              | CSF2RB     | 4848   | 21.9423      | 3.70911   | 2.56457                       | 5.00E-05 | 0.00170056 |
| XM_001716834.2    | 642131            | LOC642131  | 570    | 49.3887      | 11.6645   | 2.08206                       | 5.00E-05 | 0.00170056 |
| NM_033389.2       | 85464             | SSH2       | 9166   | 15.5236      | 7.34737   | 1.07916                       | 5.00E-05 | 0.00170056 |
| NM_018286.2       | 55273             | TMEM100    | 1755   | 11.2743      | 55.7012   | -2.30467                      | 5.00E-05 | 0.00170056 |
| NM_001010855.2    | 146850            | PIK3R6     | 3040   | 4.40492      | 1.10817   | 1.99093                       | 5.00E-05 | 0.00170056 |
| NM_033364.3       | 89876             | C3orf15    | 4433   | 4.77248      | 23.3256   | -2.28911                      | 5.00E-05 | 0.00170056 |
| NM_006142.3       | 2810              | SFN        | 1315   | 29.6634      | 6.7159    | 2.14303                       | 5.00E-05 | 0.00170056 |
| NM_182906.2       | 10462             | CLEC10A    | 1771   | 16.2476      | 3.39882   | 2.25712                       | 5.00E-05 | 0.00170056 |
| NM_003177.5       | 6850              | SYK        | 5073   | 19.3682      | 8.23804   | 1.23332                       | 5.00E-05 | 0.00170056 |
| NM_001135217.1    | 10233             | LRRC23     | 1800   | 15.7882      | 48.6042   | -1.62224                      | 5.00E-05 | 0.00170056 |
| NM_023940.2       | 65997             | RASL11B    | 1957   | 5.5833       | 19.4123   | -1.79778                      | 5.00E-05 | 0.00170056 |
| NM_001135091.1    | 143662            | MUC15      | 3392   | 7.76574      | 27.42     | -1.82003                      | 5.00E-05 | 0.00170056 |
| ENST00000457157.2 | ENSG00000231106.2 | AP000688.8 | 1048   | 2.87908      | 27.6064   | -3.26132                      | 5.00E-05 | 0.00170056 |
| NM_002737.2       | 5578              | PRKCA      | 8770   | 11.6082      | 4.46167   | 1.37949                       | 5.00E-05 | 0.00170056 |
| NM_017596.2       | 23046             | KIF21B     | 9895   | 5.5784       | 1.61248   | 1.79057                       | 5.00E-05 | 0.00170056 |
| NM_145172.3       | 126820            | WDR63      | 3007   | 6.83313      | 31.7857   | -2.21776                      | 5.00E-05 | 0.00170056 |
| NM_001657.2       | 374               | AREG       | 1238   | 11.8994      | 0         | inf                           | 5.00E-05 | 0.00170056 |
| NM_000291.3       | 5230              | PGK1       | 2423   | 107.952      | 57.1127   | 0.91851                       | 5.00E-05 | 0.00170056 |
| NM_000275.2       | 4948              | OCA2       | 3140   | 0.380531     | 1.91235   | -2.32926                      | 5.00E-05 | 0.00170056 |
| NM_001945.2       | 1839              | HBEGF      | 2358   | 20.1238      | 1.81423   | 3.47147                       | 5.00E-05 | 0.00170056 |
| NM_177401.4       | 90007             | MIDN       | 3793   | 9.88113      | 3.72268   | 1.40834                       | 5.00E-05 | 0.00170056 |
| NM_001037339.1    | 5142              | PDE4B      | 3876   | 20.0895      | 4.28492   | 2.22910                       | 5.00E-05 | 0.00170056 |

|                |             |              |       |          |          |          |          |            |
|----------------|-------------|--------------|-------|----------|----------|----------|----------|------------|
| NM_002104.2    | 3003        | GZMK         | 1045  | 11.455   | 32.4814  | -1.50364 | 5.00E-05 | 0.00170056 |
| NM_001136103.2 | 92293       | TMEM132C     | 4947  | 0.257211 | 5.482    | -4.41368 | 5.00E-05 | 0.00170056 |
| NM_002997.4    | 6382        | SDC1         | 3201  | 64.9469  | 26.6973  | 1.28257  | 5.00E-05 | 0.00170056 |
| NM_021928.3    | 60559       | SPCS3        | 4596  | 88.1756  | 42.2901  | 1.06006  | 5.00E-05 | 0.00170056 |
| NM_173543.2    | 199221      | DZIP1L       | 3498  | 4.02872  | 10.6107  | -1.39713 | 5.00E-05 | 0.00170056 |
| NM_002961.2    | 6275        | S100A4       | 512   | 254.659  | 102.697  | 1.31017  | 5.00E-05 | 0.00170056 |
| NM_006933.4    | 6526        | SLC5A3       | 11576 | 95.1134  | 28.0502  | 1.76164  | 5.00E-05 | 0.00170056 |
| NM_030938.3    | 81671       | VMP1         | 2176  | 117.521  | 42.9597  | 1.45186  | 5.00E-05 | 0.00170056 |
| NM_001854.3    | 1301        | COL11A1      | 7291  | 6.26187  | 32.4633  | -2.37415 | 5.00E-05 | 0.00170056 |
| NM_205855.3    | 389558      | FAM180A      | 1801  | 0.482871 | 3.18214  | -2.72029 | 5.00E-05 | 0.00170056 |
| NM_001008781.2 | 120114      | FAT3         | 19048 | 0.287291 | 5.86196  | -4.35080 | 5.00E-05 | 0.00170056 |
| TCONS_00081181 | XLOC_006945 | -            | 4801  | 2.54681  | 11.6812  | -2.19742 | 5.00E-05 | 0.00170056 |
| NM_001042625.1 | 133690      | CAPSL        | 972   | 25.9003  | 92.5622  | -1.83745 | 5.00E-05 | 0.00170056 |
| NM_000598.4    | 3486        | IGFBP3       | 2613  | 203.466  | 71.5229  | 1.50831  | 5.00E-05 | 0.00170056 |
| NM_001073.1    | 10720       | UGT2B11      | 1722  | 5.06682  | 0.275117 | 4.20296  | 5.00E-05 | 0.00170056 |
| TCONS_00003861 | XLOC_000716 | -            | 2713  | 1.28984  | 4.33183  | -1.74778 | 5.00E-05 | 0.00170056 |
| TCONS_00293640 | XLOC_025525 | -            | 6270  | 0.942857 | 4.03428  | -2.09720 | 5.00E-05 | 0.00170056 |
| NM_032873.4    | 84959       | UBASH3B      | 6903  | 10.321   | 5.05188  | 1.03069  | 5.00E-05 | 0.00170056 |
| NM_005980.2    | 6286        | S100P        | 510   | 43.0612  | 5.77578  | 2.89830  | 5.00E-05 | 0.00170056 |
| TCONS_00252764 | XLOC_021384 | -            | 4313  | 0.453276 | 1.76081  | -1.95778 | 5.00E-05 | 0.00170056 |
| TCONS_00012088 | XLOC_000773 | -            | 793   | 78.1617  | 439.976  | -2.49289 | 5.00E-05 | 0.00170056 |
| TCONS_00227507 | XLOC_018471 | -            | 1774  | 3.05637  | 10.4664  | -1.77588 | 5.00E-05 | 0.00170056 |
| NM_000631.4    | 4689        | NCF4         | 1398  | 13.9908  | 3.12951  | 2.16047  | 5.00E-05 | 0.00170056 |
| NM_152879.2    | 8527        | DGKD         | 6294  | 8.68417  | 3.8769   | 1.16348  | 5.00E-05 | 0.00170056 |
| NM_018407.4    | 55353       | LAPTM4B      | 2238  | 39.8211  | 15.4569  | 1.36528  | 5.00E-05 | 0.00170056 |
| NM_001036.3    | 6263        | RYR3         | 15559 | 0.794222 | 2.2559   | -1.50609 | 5.00E-05 | 0.00170056 |
| NM_004004.5    | 2706        | GJB2         | 2334  | 14.2501  | 5.78519  | 1.30054  | 5.00E-05 | 0.00170056 |
| NM_145263.2    | 132671      | SPATA18      | 4300  | 14.9987  | 43.5816  | -1.53888 | 5.00E-05 | 0.00170056 |
| NM_002467.4    | 4609        | MYC          | 2366  | 27.3251  | 8.32247  | 1.71514  | 5.00E-05 | 0.00170056 |
| NM_007361.3    | 22795       | NID2         | 5046  | 8.98417  | 21.1646  | -1.23619 | 5.00E-05 | 0.00170056 |
| NM_002514.3    | 4856        | NOV          | 2601  | 5.74545  | 34.4704  | -2.58487 | 5.00E-05 | 0.00170056 |
| NM_007038.3    | 11096       | ADAMTS5      | 9663  | 1.9889   | 6.34585  | -1.67384 | 5.00E-05 | 0.00170056 |
| NM_033280.2    | 90701       | SEC11C       | 782   | 151.468  | 70.3127  | 1.10716  | 5.00E-05 | 0.00170056 |
| NM_000046.3    | 411         | ARSB         | 6076  | 10.7126  | 3.85151  | 1.47582  | 5.00E-05 | 0.00170056 |
| NM_175884.4    | 168455      | FLJ36031     | 4424  | 17.9776  | 8.38     | 1.10118  | 5.00E-05 | 0.00170056 |
| NM_001080424.1 | 23135       | KDM6B        | 6704  | 3.96764  | 1.62728  | 1.28581  | 5.00E-05 | 0.00170056 |
| NM_173695.2    | 286464      | CXorf59      | 1956  | 6.9319   | 24.0057  | -1.79205 | 5.00E-05 | 0.00170056 |
| NM_145045.4    | 115948      | CCDC151      | 2162  | 1.92587  | 8.61973  | -2.16213 | 5.00E-05 | 0.00170056 |
| NM_198964.1    | 5744        | PTHLH        | 1854  | 12.9291  | 0.810568 | 3.99554  | 5.00E-05 | 0.00170056 |
| NM_021149.2    | 23406       | COTL1        | 1827  | 63.6715  | 17.5866  | 1.85617  | 5.00E-05 | 0.00170056 |
| NM_145912.5    | 150372      | NFAM1        | 5605  | 2.98475  | 1.12952  | 1.40190  | 5.00E-05 | 0.00170056 |
| NM_003948.3    | 8999        | CDKL2        | 4715  | 0.666814 | 2.62983  | -1.97961 | 5.00E-05 | 0.00170056 |
| NM_153235.3    | 167838      | TXLNB        | 4685  | 2.56226  | 7.72893  | -1.59285 | 5.00E-05 | 0.00170056 |
| NM_144719.3    | 152206      | CCDC13       | 2830  | 2.64926  | 7.80251  | -1.55835 | 5.00E-05 | 0.00170056 |
| NM_002122.3    | 3117        | HLA-DQA1     | 1542  | 94.8367  | 33.6839  | 1.49339  | 5.00E-05 | 0.00170056 |
| TCONS_00223831 | XLOC_018891 | -            | 5712  | 12.5731  | 2.34305  | 2.42388  | 5.00E-05 | 0.00170056 |
| NM_024884.2    | 79944       | L2HGDH       | 6095  | 14.0919  | 27.0104  | -0.93865 | 5.00E-05 | 0.00170056 |
| NM_018076.2    | 55130       | ARMC4        | 3572  | 9.8742   | 41.4973  | -2.07128 | 5.00E-05 | 0.00170056 |
| NM_004425.3    | 1893        | ECM1         | 2144  | 11.4724  | 2.44236  | 2.23182  | 5.00E-05 | 0.00170056 |
| NM_005304.3    | 2865        | FFAR3        | 1674  | 8.77307  | 0.452675 | 4.27654  | 5.00E-05 | 0.00170056 |
| NM_005384.2    | 4783        | NFIL3        | 2085  | 59.6873  | 9.82135  | 2.60343  | 5.00E-05 | 0.00170056 |
| XM_003118966.1 | 100506711   | LOC100506711 | 1898  | 4.06174  | 20.2473  | -2.31756 | 5.00E-05 | 0.00170056 |
| NM_001079910.1 | 84125       | LRRIQ1       | 5444  | 13.4672  | 54.0678  | -2.00532 | 5.00E-05 | 0.00170056 |
| NM_001031745.1 | 158787      | RIBC1        | 1416  | 2.28167  | 14.4864  | -2.66654 | 5.00E-05 | 0.00170056 |

|                |             |          |       |          |          |          |          |            |
|----------------|-------------|----------|-------|----------|----------|----------|----------|------------|
| NM_001629.3    | 241         | ALOX5AP  | 906   | 48.3052  | 13.3778  | 1.85234  | 5.00E-05 | 0.00170056 |
| NM_153704.5    | 91147       | TMEM67   | 4726  | 8.38558  | 21.2782  | -1.34340 | 5.00E-05 | 0.00170056 |
| NM_001079878.1 | 1261        | CNGA3    | 3794  | 0.241541 | 1.2203   | -2.33690 | 5.00E-05 | 0.00170056 |
| NM_002988.2    | 6362        | CCL18    | 770   | 279.754  | 0.653166 | 8.74249  | 5.00E-05 | 0.00170056 |
| NM_000101.2    | 1535        | CYBA     | 688   | 162.801  | 76.725   | 1.08534  | 5.00E-05 | 0.00170056 |
| NM_003897.3    | 8870        | IER3     | 1240  | 35.0216  | 10.9513  | 1.67714  | 5.00E-05 | 0.00170056 |
| NM_152598.2    | 162333      | MARCH10  | 3101  | 1.5887   | 8.47365  | -2.41514 | 5.00E-05 | 0.00170056 |
| NM_001080448.2 | 285220      | EPHA6    | 3677  | 0.186602 | 1.03577  | -2.47267 | 5.00E-05 | 0.00170056 |
| NM_001030060.2 | 389432      | SAMD5    | 6324  | 12.1427  | 4.69825  | 1.36990  | 5.00E-05 | 0.00170056 |
| NM_005708.3    | 10082       | GPC6     | 7103  | 2.27758  | 8.49701  | -1.89945 | 5.00E-05 | 0.00170056 |
| NM_002003.3    | 2219        | FCN1     | 1283  | 17.2839  | 3.82727  | 2.17504  | 5.00E-05 | 0.00170056 |
| NM_024867.3    | 79925       | SPEF2    | 5638  | 5.444    | 22.2826  | -2.03318 | 5.00E-05 | 0.00170056 |
| NM_012288.3    | 9697        | TRAM2    | 7057  | 19.9076  | 9.93161  | 1.00322  | 5.00E-05 | 0.00170056 |
| NM_144698.3    | 148741      | ANKRD35  | 3363  | 1.85108  | 5.09502  | -1.46072 | 5.00E-05 | 0.00170056 |
| NM_181711.2    | 160622      | GRASP    | 1932  | 8.23946  | 2.87952  | 1.51672  | 5.00E-05 | 0.00170056 |
| NM_052863.2    | 92304       | SCGB3A1  | 466   | 4.88362  | 80.549   | -4.04384 | 5.00E-05 | 0.00170056 |
| TCONS_00201765 | XLOC_018236 | -        | 8017  | 1.78016  | 4.85068  | -1.44618 | 5.00E-05 | 0.00170056 |
| NM_145170.3    | 118491      | TTC18    | 3704  | 10.4075  | 40.6025  | -1.96394 | 5.00E-05 | 0.00170056 |
| NM_000265.4    | 653361      | NCF1     | 1398  | 13.3119  | 2.59711  | 2.35774  | 5.00E-05 | 0.00170056 |
| NM_000139.4    | 2206        | MS4A2    | 3648  | 27.5668  | 11.4365  | 1.26929  | 5.00E-05 | 0.00170056 |
| NM_178504.4    | 201625      | DNAH12   | 9542  | 12.8389  | 45.6945  | -1.83149 | 5.00E-05 | 0.00170056 |
| NM_014466.2    | 27285       | TEKT2    | 1509  | 5.07481  | 24.9418  | -2.29714 | 5.00E-05 | 0.00170056 |
| NM_025015.2    | 259217      | HSPA12A  | 5722  | 1.47978  | 3.58952  | -1.27841 | 5.00E-05 | 0.00170056 |
| NM_005627.3    | 6446        | SGK1     | 2407  | 134.757  | 42.5093  | 1.66450  | 5.00E-05 | 0.00170056 |
| NM_207317.1    | 133923      | ZNF474   | 1957  | 6.47632  | 20.8802  | -1.68889 | 5.00E-05 | 0.00170056 |
| NM_000702.3    | 477         | ATP1A2   | 5464  | 6.65188  | 38.7615  | -2.54279 | 5.00E-05 | 0.00170056 |
| NM_001085429.1 | 155006      | TMEM213  | 3390  | 5.64097  | 26.4686  | -2.23027 | 5.00E-05 | 0.00170056 |
| NM_014903.4    | 89795       | NAV3     | 9758  | 2.21698  | 5.85657  | -1.40146 | 5.00E-05 | 0.00170056 |
| NM_173494.1    | 139212      | CXorf41  | 1652  | 3.14892  | 15.2259  | -2.27360 | 5.00E-05 | 0.00170056 |
| NM_002581.3    | 5069        | PAPPA    | 10970 | 32.4343  | 7.75811  | 2.06375  | 5.00E-05 | 0.00170056 |
| NM_031935.2    | 83872       | HMCN1    | 18212 | 27.1518  | 11.1751  | 1.28077  | 5.00E-05 | 0.00170056 |
| NM_006639.2    | 10800       | CYSLTR1  | 1514  | 20.5954  | 7.66382  | 1.42618  | 5.00E-05 | 0.00170056 |
| NM_024807.2    | 79865       | TREML2   | 3758  | 2.55859  | 0.469347 | 2.44662  | 5.00E-05 | 0.00170056 |
| NM_178827.4    | 154865      | IQUB     | 3115  | 8.04017  | 31.1307  | -1.95304 | 5.00E-05 | 0.00170056 |
| NM_178837.3    | 352909      | C19orf51 | 2168  | 2.62417  | 8.7638   | -1.73970 | 5.00E-05 | 0.00170056 |
| NM_031956.2    | 83894       | TTC29    | 1786  | 8.44536  | 27.9181  | -1.72497 | 5.00E-05 | 0.00170056 |
| NM_003014.3    | 6424        | SFRP4    | 2974  | 7.14851  | 153.406  | -4.42357 | 5.00E-05 | 0.00170056 |
| NM_002727.2    | 5552        | SRGN     | 1254  | 600.399  | 112.672  | 2.41379  | 5.00E-05 | 0.00170056 |
| NM_015662.1    | 26160       | IFT172   | 5360  | 14.0191  | 31.0676  | -1.14802 | 5.00E-05 | 0.00170056 |
| NM_033160.5    | 26149       | ZNF658   | 4025  | 4.696    | 10.1793  | -1.11614 | 5.00E-05 | 0.00170056 |
| NM_020693.2    | 57453       | DSCAML1  | 6899  | 0.235658 | 1.03849  | -2.13973 | 5.00E-05 | 0.00170056 |
| NM_012144.2    | 27019       | DNAI1    | 2521  | 7.08097  | 24.9454  | -1.81675 | 5.00E-05 | 0.00170056 |
| NM_032606.3    | 84698       | CAPS2    | 2135  | 6.00691  | 21.1214  | -1.81401 | 5.00E-05 | 0.00170056 |
| NM_001040429.2 | 27253       | PCDH17   | 8009  | 6.79971  | 2.6493   | 1.35986  | 5.00E-05 | 0.00170056 |
| NM_015931.1    | 51066       | C3orf32  | 1545  | 0.348944 | 2.79847  | -3.00357 | 5.00E-05 | 0.00170056 |
| NM_001077710.2 | 642273      | FAM110C  | 3963  | 10.7553  | 2.43354  | 2.14393  | 5.00E-05 | 0.00170056 |
| NM_000962.2    | 5742        | PTGS1    | 5093  | 8.82318  | 2.88737  | 1.61154  | 5.00E-05 | 0.00170056 |
| NM_014632.2    | 9645        | MICAL2   | 3906  | 10.2637  | 3.88019  | 1.40335  | 5.00E-05 | 0.00170056 |
| NM_002649.2    | 5294        | PIK3CG   | 5379  | 18.0233  | 7.36006  | 1.29208  | 5.00E-05 | 0.00170056 |
| NM_000044.2    | 367         | AR       | 4314  | 0.790178 | 3.04562  | -1.94649 | 5.00E-05 | 0.00170056 |
| NM_173216.2    | 6480        | ST6GAL1  | 4604  | 43.8891  | 17.7964  | 1.30228  | 5.00E-05 | 0.00170056 |
| NM_015693.3    | 27152       | INTU     | 3275  | 7.3657   | 20.2313  | -1.45770 | 5.00E-05 | 0.00170056 |
| NM_001039844.2 | 414149      | ACBD7    | 3370  | 1.42869  | 4.72131  | -1.72450 | 5.00E-05 | 0.00170056 |
| TCONS_00249726 | XLOC_021972 | -        | 531   | 0        | 1.68252  | #NAME?   | 5.00E-05 | 0.00170056 |

|                |             |           |       |          |         |          |          |            |
|----------------|-------------|-----------|-------|----------|---------|----------|----------|------------|
| NM_031415.2    | 56169       | GSDMC     | 2714  | 6.78051  | 1.90975 | 1.82801  | 5.00E-05 | 0.00170056 |
| NM_000065.2    | 729         | C6        | 3606  | 3.27154  | 21.8203 | -2.73763 | 5.00E-05 | 0.00170056 |
| NM_000417.2    | 3559        | IL2RA     | 3216  | 5.75801  | 1.52618 | 1.91564  | 5.00E-05 | 0.00170056 |
| NM_178456.2    | 128602      | C20orf85  | 760   | 39.5108  | 158.377 | -2.00305 | 5.00E-05 | 0.00170056 |
| NM_003821.5    | 8767        | RIPK2     | 2585  | 12.6198  | 3.62347 | 1.80025  | 5.00E-05 | 0.00170056 |
| NM_001198557.1 | 4001        | LMNB1     | 2250  | 17.5965  | 6.30134 | 1.48156  | 5.00E-05 | 0.00170056 |
| TCONS_00057873 | XLOC_005084 | -         | 5007  | 3.53054  | 8.61976 | -1.28776 | 5.00E-05 | 0.00170056 |
| NM_002984.2    | 6351        | CCL4      | 667   | 33.9214  | 9.08694 | 1.90033  | 5.00E-05 | 0.00170056 |
| NM_024888.1    | 79948       | LPPR3     | 2357  | 1.02215  | 4.00613 | -1.97060 | 5.00E-05 | 0.00170056 |
| NM_007153.3    | 7757        | ZNF208    | 9088  | 2.41327  | 6.95137 | -1.52631 | 5.00E-05 | 0.00170056 |
| NM_152680.2    | 201799      | TMEM154   | 3216  | 34.4422  | 14.4901 | 1.24911  | 5.00E-05 | 0.00170056 |
| NM_003619.3    | 8492        | PRSS12    | 4573  | 11.6658  | 27.5263 | -1.23853 | 5.00E-05 | 0.00170056 |
| NM_001100159.1 | 136288      | C7orf57   | 2125  | 3.93158  | 12.3181 | -1.64759 | 5.00E-05 | 0.00170056 |
| NM_032824.2    | 84910       | TMEM87B   | 5212  | 39.4996  | 20.7994 | 0.92530  | 5.00E-05 | 0.00170056 |
| NM_024560.2    | 79611       | ACSS3     | 3033  | 5.82008  | 19.9558 | -1.77770 | 5.00E-05 | 0.00170056 |
| NM_145047.4    | 127700      | OSCP1     | 1489  | 11.4481  | 29.7953 | -1.37998 | 5.00E-05 | 0.00170056 |
| NM_005204.2    | 1326        | MAP3K8    | 3096  | 30.9818  | 10.5383 | 1.55578  | 5.00E-05 | 0.00170056 |
| NM_012190.2    | 10840       | ALDH1L1   | 3125  | 2.22124  | 9.22464 | -2.05413 | 5.00E-05 | 0.00170056 |
| NM_000061.2    | 695         | BTK       | 2611  | 22.4299  | 6.12768 | 1.87201  | 5.00E-05 | 0.00170056 |
| NM_144715.3    | 151651      | EFHB      | 2857  | 8.40831  | 35.2173 | -2.06640 | 5.00E-05 | 0.00170056 |
| NM_001013647.1 | 646851      | LOC646851 | 10322 | 1.77391  | 5.49157 | -1.63028 | 5.00E-05 | 0.00170056 |
| NM_013272.3    | 28232       | SLCO3A1   | 5106  | 7.86589  | 3.09837 | 1.34410  | 5.00E-05 | 0.00170056 |
| NM_018584.5    | 55450       | CAMK2N1   | 2351  | 10.5932  | 3.24987 | 1.70468  | 5.00E-05 | 0.00170056 |
| NM_003979.3    | 9052        | GPRC5A    | 2851  | 6.94941  | 2.34565 | 1.56690  | 5.00E-05 | 0.00170056 |
| NM_012328.2    | 4189        | DNAJB9    | 2538  | 39.975   | 18.8914 | 1.08136  | 5.00E-05 | 0.00170056 |
| NM_001174072.1 | 256987      | SERINC5   | 6479  | 24.783   | 10.2662 | 1.27146  | 5.00E-05 | 0.00170056 |
| NM_014674.2    | 9695        | EDEM1     | 6153  | 29.5093  | 12.1409 | 1.28130  | 5.00E-05 | 0.00170056 |
| NM_001010940.1 | 138255      | C9orf135  | 851   | 11.6641  | 34.1389 | -1.54934 | 5.00E-05 | 0.00170056 |
| NM_007074.3    | 11151       | CORO1A    | 1815  | 36.571   | 12.1786 | 1.58636  | 5.00E-05 | 0.00170056 |
| NM_001170820.3 | 402778      | IFITM10   | 3709  | 0.698434 | 2.86259 | -2.03513 | 5.00E-05 | 0.00170056 |
| NM_020212.1    | 56964       | WDR93     | 2409  | 1.50382  | 5.25529 | -1.80514 | 5.00E-05 | 0.00170056 |
| NM_032576.4    | 84663       | CYorf15B  | 3315  | 21.5738  | 4.0505  | 2.41311  | 5.00E-05 | 0.00170056 |
| NM_033274.3    | 8728        | ADAM19    | 6481  | 10.8558  | 3.69234 | 1.55586  | 5.00E-05 | 0.00170056 |
| NM_000396.3    | 1513        | CTSK      | 1810  | 46.1817  | 127.079 | -1.46033 | 5.00E-05 | 0.00170056 |
| NM_012395.2    | 5218        | CDK14     | 4953  | 13.6129  | 27.1805 | -0.99760 | 5.00E-05 | 0.00170056 |
| NM_006280.2    | 6748        | SSR4      | 725   | 199.183  | 78.1322 | 1.35011  | 5.00E-05 | 0.00170056 |
| NM_031898.2    | 64518       | TEKT3     | 1784  | 0.90014  | 3.70959 | -2.04304 | 5.00E-05 | 0.00170056 |
| NM_054110.4    | 117248      | GALNTL2   | 4641  | 1.2918   | 3.83698 | -1.57059 | 5.00E-05 | 0.00170056 |
| NM_000655.4    | 6402        | SELL      | 2442  | 23.0295  | 7.72278 | 1.57629  | 5.00E-05 | 0.00170056 |
| NM_178821.1    | 164781      | WDR69     | 1669  | 9.13292  | 39.8756 | -2.12636 | 5.00E-05 | 0.00170056 |
| NM_001064.3    | 7086        | TKT       | 2164  | 48.736   | 21.9879 | 1.14828  | 5.00E-05 | 0.00170056 |
| NM_005213.3    | 1475        | CSTA      | 828   | 43.2697  | 10.0048 | 2.11267  | 5.00E-05 | 0.00170056 |
| NM_001130162.2 | 219736      | STOX1     | 3112  | 10.9188  | 26.7714 | -1.29387 | 5.00E-05 | 0.00170056 |
| XM_003118942.2 | 374467      | C12orf63  | 2401  | 6.2977   | 24.4605 | -1.95756 | 5.00E-05 | 0.00170056 |
| NM_001067.3    | 7153        | TOP2A     | 5753  | 14.6506  | 4.72787 | 1.63169  | 5.00E-05 | 0.00170056 |
| NM_144644.2    | 132851      | SPATA4    | 1233  | 1.66859  | 7.80859 | -2.22644 | 5.00E-05 | 0.00170056 |
| TCONS_00000209 | XLOC_000044 | -         | 4800  | 0.472175 | 1.8116  | -1.93987 | 5.00E-05 | 0.00170056 |
| NM_012443.2    | 9576        | SPAG6     | 2594  | 16.7179  | 57.6194 | -1.78516 | 5.00E-05 | 0.00170056 |
| NM_153183.2    | 170685      | NUDT10    | 2001  | 22.8247  | 3.37292 | 2.75853  | 5.00E-05 | 0.00170056 |
| NM_002432.1    | 4332        | MNDA      | 1667  | 31.3812  | 13.1432 | 1.25559  | 5.00E-05 | 0.00170056 |
| NM_173572.3    | 255352      | C10orf93  | 1587  | 2.55775  | 8.79777 | -1.78226 | 5.00E-05 | 0.00170056 |
| NM_001080850.2 | 728621      | CCDC30    | 3098  | 3.12308  | 9.41758 | -1.59239 | 5.00E-05 | 0.00170056 |
| NM_001109.4    | 101         | ADAM8     | 3301  | 12.3708  | 1.47301 | 3.07009  | 5.00E-05 | 0.00170056 |
| NM_001040058.1 | 6696        | SPP1      | 1625  | 23.5519  | 102.889 | -2.12717 | 5.00E-05 | 0.00170056 |

|                |             |           |       |          |          |          |          |            |
|----------------|-------------|-----------|-------|----------|----------|----------|----------|------------|
| TCONS_00283288 | XLOC_024299 | -         | 6864  | 1.11415  | 3.02398  | -1.44051 | 5.00E-05 | 0.00170056 |
| NM_001030287.2 | 467         | ATF3      | 1899  | 45.0643  | 6.03787  | 2.89987  | 5.00E-05 | 0.00170056 |
| NM_002659.3    | 5329        | PLAUR     | 1553  | 17.4066  | 1.37001  | 3.66738  | 5.00E-05 | 0.00170056 |
| NM_013250.2    | 7762        | ZNF215    | 3658  | 8.10533  | 2.64557  | 1.61529  | 5.00E-05 | 0.00170056 |
| NM_002546.3    | 4982        | TNFRSF11B | 2346  | 7.52949  | 2.03945  | 1.88437  | 5.00E-05 | 0.00170056 |
| TCONS_00070847 | XLOC_005757 | -         | 1130  | 5.74113  | 0.477057 | 3.58910  | 5.00E-05 | 0.00170056 |
| NM_001010922.2 | 440603      | BCL2L15   | 4973  | 4.73389  | 1.73169  | 1.45085  | 5.00E-05 | 0.00170056 |
| NM_020377.2    | 57105       | CYSLTR2   | 2548  | 6.56887  | 2.15613  | 1.60720  | 5.00E-05 | 0.00170056 |
| NM_004460.2    | 2191        | FAP       | 2780  | 19.0462  | 7.25056  | 1.39334  | 5.00E-05 | 0.00170056 |
| NM_000217.2    | 3736        | KCNA1     | 7983  | 0.253352 | 2.53179  | -3.32095 | 5.00E-05 | 0.00170056 |
| NM_152376.3    | 127733      | UBXN10    | 2972  | 12.5561  | 47.6268  | -1.92338 | 5.00E-05 | 0.00170056 |
| NM_145026.3    | 221409      | SPATS1    | 1108  | 1.25357  | 5.21639  | -2.05701 | 5.00E-05 | 0.00170056 |
| NM_001156474.1 | 60494       | CCDC81    | 2781  | 3.36532  | 13.5553  | -2.01004 | 5.00E-05 | 0.00170056 |
| NM_145054.4    | 146845      | WDR16     | 2193  | 5.82124  | 27.0806  | -2.21786 | 5.00E-05 | 0.00170056 |
| TCONS_00249239 | XLOC_021575 | -         | 5196  | 0.251903 | 2.92079  | -3.53542 | 5.00E-05 | 0.00170056 |
| NM_002229.2    | 3726        | JUNB      | 1816  | 148.001  | 12.9681  | 3.51257  | 5.00E-05 | 0.00170056 |
| NM_001679.2    | 483         | ATP1B3    | 1853  | 62.2088  | 21.1698  | 1.55511  | 5.00E-05 | 0.00170056 |
| NM_001080427.1 | 80731       | THSD7B    | 5846  | 0.413448 | 2.51427  | -2.60436 | 5.00E-05 | 0.00170056 |
| NM_033027.3    | 64651       | CSRNP1    | 3188  | 35.6808  | 4.02159  | 3.14931  | 5.00E-05 | 0.00170056 |
| NM_145286.2    | 161003      | STOML3    | 1914  | 10.6788  | 25.2226  | -1.23997 | 5.00E-05 | 0.00170056 |
| NM_002048.2    | 2619        | GAS1      | 2828  | 30.6588  | 15.1699  | 1.01509  | 5.00E-05 | 0.00170056 |
| TCONS_00003383 | XLOC_000243 | -         | 4161  | 0.938795 | 3.75326  | -1.99926 | 5.00E-05 | 0.00170056 |
| NM_002825.5    | 5764        | PTN       | 1549  | 15.0362  | 60.3928  | -2.00594 | 5.00E-05 | 0.00170056 |
| NM_002046.3    | 2597        | GAPDH     | 1310  | 738.082  | 290.794  | 1.34379  | 5.00E-05 | 0.00170056 |
| NM_001003443.2 | 390083      | OR56A3    | 948   | 0        | 0.937648 | #NAME?   | 5.00E-05 | 0.00170056 |
| NM_006636.3    | 10797       | MTHFD2    | 2188  | 21.7496  | 8.87822  | 1.29265  | 5.00E-05 | 0.00170056 |
| NM_001944.2    | 1830        | DSG3      | 5551  | 4.54055  | 1.05254  | 2.10899  | 5.00E-05 | 0.00170056 |
| NM_002460.3    | 3662        | IRF4      | 5327  | 10.6825  | 3.36478  | 1.66667  | 5.00E-05 | 0.00170056 |
| NM_004525.2    | 4036        | LRP2      | 15735 | 15.161   | 4.92522  | 1.62210  | 5.00E-05 | 0.00170056 |
| NM_000219.3    | 3753        | KCNE1     | 3321  | 3.96127  | 10.7817  | -1.44455 | 5.00E-05 | 0.00170056 |
| TCONS_00000172 | XLOC_000042 | -         | 1923  | 0.669346 | 5.6619   | -3.08046 | 5.00E-05 | 0.00170056 |
| NM_001039706.2 | 79846       | C7orf63   | 3902  | 6.30568  | 17.8984  | -1.50510 | 5.00E-05 | 0.00170056 |
| NM_001080484.1 | 85452       | KIAA1751  | 4710  | 0.878993 | 4.02044  | -2.19343 | 5.00E-05 | 0.00170056 |
| NM_032571.3    | 84658       | EMR3      | 2301  | 15.9376  | 0.30838  | 5.69158  | 5.00E-05 | 0.00170056 |
| NM_052941.4    | 115361      | GBP4      | 6145  | 12.4544  | 30.1788  | -1.27688 | 5.00E-05 | 0.00170056 |
| NM_144717.3    | 53833       | IL20RB    | 2047  | 10.9365  | 3.4085   | 1.68194  | 5.00E-05 | 0.00170056 |
| NM_001911.2    | 1511        | CTSG      | 924   | 46.5036  | 6.01945  | 2.94964  | 5.00E-05 | 0.00170056 |
| NM_001144960.1 | 389161      | ANKUB1    | 2476  | 10.4254  | 27.8536  | -1.41775 | 5.00E-05 | 0.00170056 |
| NM_004352.3    | 869         | CBLN1     | 2435  | 0.296986 | 3.92345  | -3.72365 | 5.00E-05 | 0.00170056 |
| TCONS_00000123 | XLOC_000026 | -         | 2415  | 0.250394 | 1.81299  | -2.85610 | 5.00E-05 | 0.00170056 |
| NM_024574.3    | 79625       | NDNF      | 2871  | 3.33565  | 12.2793  | -1.88018 | 5.00E-05 | 0.00170056 |
| NM_000615.6    | 4684        | NCAM1     | 5962  | 1.0277   | 5.78442  | -2.49275 | 5.00E-05 | 0.00170056 |
| NM_002125.3    | 3127        | HLA-DRB5  | 1171  | 5.43834  | 22.1431  | -2.02562 | 5.00E-05 | 0.00170056 |
| NM_001012642.2 | 196996      | GRAMD2    | 3292  | 3.82356  | 9.40145  | -1.29796 | 5.00E-05 | 0.00170056 |
| NM_000526.4    | 3861        | KRT14     | 1636  | 5.29778  | 0.611884 | 3.11406  | 5.00E-05 | 0.00170056 |
| NM_005566.3    | 3939        | LDHA      | 2208  | 234.909  | 77.9652  | 1.59120  | 5.00E-05 | 0.00170056 |
| NM_032211.6    | 84171       | LOXL4     | 3657  | 25.2029  | 8.47835  | 1.57174  | 5.00E-05 | 0.00170056 |
| NM_152362.2    | 126282      | TNFAIP8L1 | 3817  | 6.40115  | 16.0006  | -1.32172 | 5.00E-05 | 0.00170056 |
| NM_030926.4    | 81618       | ITM2C     | 2073  | 59.6746  | 24.8347  | 1.26476  | 5.00E-05 | 0.00170056 |
| NM_145252.2    | 124220      | ZG16B     | 828   | 13.1537  | 61.1025  | -2.21576 | 5.00E-05 | 0.00170056 |
| NM_025184.3    | 80258       | EFHC2     | 3252  | 5.64227  | 18.893   | -1.74350 | 5.00E-05 | 0.00170056 |
| NM_007350.3    | 22822       | PHLDA1    | 5913  | 26.4457  | 5.7379   | 2.20444  | 5.00E-05 | 0.00170056 |
| NM_015675.3    | 4616        | GADD45B   | 1375  | 52.339   | 21.8018  | 1.26344  | 5.00E-05 | 0.00170056 |
| NM_012387.2    | 23569       | PADI4     | 2265  | 4.85325  | 0.317879 | 3.93240  | 5.00E-05 | 0.00170056 |

|                |             |              |       |          |          |          |          |            |
|----------------|-------------|--------------|-------|----------|----------|----------|----------|------------|
| NM_001554.4    | 3491        | CYR61        | 2295  | 110.679  | 13.7271  | 3.01128  | 5.00E-05 | 0.00170056 |
| NM_020299.4    | 57016       | AKR1B10      | 1596  | 6.47911  | 1.1011   | 2.55685  | 5.00E-05 | 0.00170056 |
| NM_012397.3    | 5275        | SERPINB13    | 3180  | 17.1446  | 4.23549  | 2.01715  | 5.00E-05 | 0.00170056 |
| NM_000112.3    | 1836        | SLC26A2      | 8075  | 56.1722  | 22.1299  | 1.34386  | 5.00E-05 | 0.00170056 |
| NM_020869.3    | 100506627   | DCDC5        | 4759  | 2.80936  | 9.17827  | -1.70798 | 5.00E-05 | 0.00170056 |
| NM_004508.2    | 3422        | IDI1         | 2137  | 65.5286  | 29.5263  | 1.15012  | 5.00E-05 | 0.00170056 |
| NM_182500.2    | 130813      | C2orf50      | 1056  | 1.11889  | 6.83274  | -2.61039 | 5.00E-05 | 0.00170056 |
| NM_002115.2    | 3101        | HK3          | 3068  | 15.1287  | 0.663501 | 4.51105  | 5.00E-05 | 0.00170056 |
| NM_001039763.3 | 642987      | TMEM232      | 3193  | 9.65451  | 24.1181  | -1.32084 | 5.00E-05 | 0.00170056 |
| TCONS_00165587 | XLOC_013757 | -            | 437   | 2.9392   | 0        | inf      | 5.00E-05 | 0.00170056 |
| NM_004363.2    | 1048        | CEACAM5      | 3600  | 41.1753  | 0.671976 | 5.93723  | 5.00E-05 | 0.00170056 |
| NM_001098514.1 | 146556      | C16orf89     | 1514  | 3.06909  | 14.9426  | -2.28354 | 5.00E-05 | 0.00170056 |
| NM_207437.3    | 196385      | DNAH10       | 13680 | 6.57225  | 23.8282  | -1.85821 | 5.00E-05 | 0.00170056 |
| NM_004058.3    | 828         | CAPS         | 1609  | 47.3822  | 131.512  | -1.47278 | 5.00E-05 | 0.00170056 |
| NM_006691.3    | 10894       | LYVE1        | 2500  | 44.01    | 19.3941  | 1.18221  | 5.00E-05 | 0.00170056 |
| NM_001145018.1 | 283152      | CCDC153      | 767   | 4.90997  | 16.3248  | -1.73328 | 5.00E-05 | 0.00170056 |
| NM_178813.5    | 158798      | AKAP14       | 841   | 6.71294  | 30.2542  | -2.17212 | 5.00E-05 | 0.00170056 |
| NM_000419.3    | 3674        | ITGA2B       | 3334  | 1.06     | 0.199398 | 2.41035  | 5.00E-05 | 0.00170056 |
| NM_002977.3    | 6335        | SCN9A        | 9762  | 4.71871  | 1.78019  | 1.40636  | 5.00E-05 | 0.00170056 |
| TCONS_00032728 | XLOC_003418 | -            | 2076  | 4.3234   | 47.5869  | -3.46033 | 5.00E-05 | 0.00170056 |
| NM_003955.3    | 9021        | SOCS3        | 2734  | 117.977  | 3.55188  | 5.05378  | 5.00E-05 | 0.00170056 |
| NM_001127391.1 | 130540      | ALS2CR12     | 1944  | 3.72552  | 16.0725  | -2.10908 | 5.00E-05 | 0.00170056 |
| XM_003118889.1 | 100506859   | LOC100506859 | 703   | 5.49813  | 22.1987  | -2.01346 | 5.00E-05 | 0.00170056 |
| NM_017855.3    | 54959       | ODAM         | 1288  | 54.2032  | 7.88492  | 2.78121  | 5.00E-05 | 0.00170056 |
| NM_000130.4    | 2153        | F5           | 9179  | 5.81776  | 2.19784  | 1.40438  | 5.00E-05 | 0.00170056 |
| NM_002974.2    | 6318        | SERPINB4     | 1719  | 103.029  | 3.23896  | 4.99138  | 5.00E-05 | 0.00170056 |
| NM_017886.2    | 54986       | ULK4         | 4359  | 9.24386  | 21.088   | -1.18985 | 5.00E-05 | 0.00170056 |
| NM_145020.3    | 220136      | CCDC11       | 1824  | 6.70235  | 28.2129  | -2.07362 | 5.00E-05 | 0.00170056 |
| NM_017589.2    | 54766       | BTG4         | 999   | 2.75616  | 10.9686  | -1.99266 | 5.00E-05 | 0.00170056 |
| NM_032611.1    | 11156       | PTP4A3       | 1332  | 16.5478  | 4.44912  | 1.89505  | 5.00E-05 | 0.00170056 |
| NM_152687.2    | 202309      | GAPT         | 2216  | 28.9959  | 5.16463  | 2.48911  | 5.00E-05 | 0.00170056 |
| NM_080390.3    | 140597      | TCEAL2       | 1101  | 1.34963  | 9.36736  | -2.79508 | 5.00E-05 | 0.00170056 |
| NM_003360.3    | 7368        | UGT8         | 2898  | 10.1334  | 20.8189  | -1.03878 | 5.00E-05 | 0.00170056 |
| NM_003370.3    | 7408        | VASP         | 2291  | 31.042   | 11.2423  | 1.46528  | 5.00E-05 | 0.00170056 |
| NM_004907.2    | 9592        | IER2         | 2050  | 29.3684  | 5.29304  | 2.47210  | 5.00E-05 | 0.00170056 |
| NM_152770.2    | 255119      | C4orf22      | 895   | 6.7066   | 28.0882  | -2.06631 | 5.00E-05 | 0.00170056 |
| NM_145175.2    | 151354      | FAM84A       | 6355  | 9.19153  | 4.57183  | 1.00753  | 5.00E-05 | 0.00170056 |
| NM_000358.2    | 7045        | TGFB1        | 2805  | 82.931   | 39.0258  | 1.08749  | 5.00E-05 | 0.00170056 |
| TCONS_00282969 | XLOC_023780 | -            | 3213  | 0.921909 | 3.73735  | -2.01932 | 5.00E-05 | 0.00170056 |
| NM_017839.4    | 54947       | LPCAT2       | 5388  | 20.1654  | 6.29546  | 1.67950  | 5.00E-05 | 0.00170056 |
| NM_197941.2    | 11174       | ADAMTS6      | 7268  | 3.10697  | 1.34298  | 1.21007  | 5.00E-05 | 0.00170056 |
| NM_014079.3    | 28999       | KLF15        | 2525  | 1.22461  | 4.99131  | -2.02710 | 5.00E-05 | 0.00170056 |
| NM_004994.2    | 4318        | MMP9         | 2336  | 0.916865 | 14.5385  | -3.98702 | 5.00E-05 | 0.00170056 |
| NM_001033602.2 | 23281       | MTUS2        | 6939  | 0.319814 | 1.43098  | -2.16171 | 5.00E-05 | 0.00170056 |
| NM_024418.1    | 9256        | BZRAP1       | 7514  | 2.20831  | 5.13842  | -1.21838 | 5.00E-05 | 0.00170056 |
| NM_001870.2    | 1359        | CPA3         | 1686  | 264.984  | 36.5306  | 2.85873  | 5.00E-05 | 0.00170056 |
| NM_003043.3    | 6533        | SLC6A6       | 6508  | 126.986  | 50.2661  | 1.33701  | 5.00E-05 | 0.00170056 |
| NM_013381.2    | 29953       | TRHDE        | 5552  | 0.335649 | 3.75703  | -3.48457 | 5.00E-05 | 0.00170056 |
| NM_203339.2    | 1191        | CLU          | 2860  | 122.375  | 279.351  | -1.19077 | 5.00E-05 | 0.00170056 |
| NM_053285.1    | 83659       | TEKT1        | 1413  | 20.1326  | 79.21    | -1.97615 | 5.00E-05 | 0.00170056 |
| NM_000930.3    | 5327        | PLAT         | 3173  | 5.84999  | 28.5812  | -2.28856 | 5.00E-05 | 0.00170056 |
| NM_002123.3    | 3119        | HLA-DQB1     | 1224  | 89.406   | 22.0882  | 2.01709  | 5.00E-05 | 0.00170056 |
| NM_153264.5    | 256076      | COL6A5       | 8878  | 6.48335  | 0.219015 | 4.88764  | 5.00E-05 | 0.00170056 |
| NM_001113547.1 | 51474       | LIMA1        | 3622  | 102.866  | 27.722   | 1.89166  | 5.00E-05 | 0.00170056 |



|                |             |              |       |          |          |          |          |            |
|----------------|-------------|--------------|-------|----------|----------|----------|----------|------------|
| NM_001145442.1 | 641455      | POTEM        | 6666  | 0.27445  | 1.23478  | -2.16964 | 5.00E-05 | 0.00170056 |
| NM_020406.2    | 57126       | CD177        | 2364  | 9.13642  | 1.36081  | 2.74716  | 5.00E-05 | 0.00170056 |
| NM_007231.3    | 11254       | SLC6A14      | 4564  | 106.149  | 29.2591  | 1.85914  | 5.00E-05 | 0.00170056 |
| NM_199347.2    | 152110      | NEK10        | 2639  | 11.1674  | 45.0304  | -2.01160 | 5.00E-05 | 0.00170056 |
| NM_001130958.1 | 2172        | FABP6        | 743   | 7.31356  | 48.3289  | -2.72424 | 5.00E-05 | 0.00170056 |
| NM_002205.2    | 3678        | ITGA5        | 4250  | 15.2216  | 6.36978  | 1.25681  | 5.00E-05 | 0.00170056 |
| NM_000851.3    | 2949        | GSTM5        | 1570  | 0.357057 | 7.12814  | -4.31930 | 5.00E-05 | 0.00170056 |
| NM_025052.3    | 80122       | YSK4         | 4165  | 7.89697  | 29.9628  | -1.92380 | 5.00E-05 | 0.00170056 |
| NM_018015.5    | 55086       | CXorf57      | 3904  | 0.482906 | 2.29723  | -2.25008 | 5.00E-05 | 0.00170056 |
| NM_001218.3    | 771         | CA12         | 3975  | 21.661   | 3.83575  | 2.49752  | 5.00E-05 | 0.00170056 |
| NM_001005473.2 | 345557      | PLCXD3       | 7739  | 0.342657 | 2.00238  | -2.54688 | 5.00E-05 | 0.00170056 |
| NM_001030059.1 | 196051      | PPAPDC1A     | 1521  | 4.88901  | 1.12718  | 2.11682  | 5.00E-05 | 0.00170056 |
| NM_018986.3    | 54436       | SH3TC1       | 4260  | 7.47804  | 2.66184  | 1.49024  | 5.00E-05 | 0.00170056 |
| NM_173565.3    | 222967      | RSPH10B      | 3106  | 1.18031  | 5.25776  | -2.15529 | 5.00E-05 | 0.00170056 |
| NM_024913.4    | 79974       | C7orf58      | 5320  | 5.19445  | 14.1535  | -1.44612 | 5.00E-05 | 0.00170056 |
| NM_052901.2    | 114789      | SLC25A25     | 3240  | 21.564   | 5.28853  | 2.02769  | 5.00E-05 | 0.00170056 |
| NM_014737.2    | 9770        | RASSF2       | 5426  | 44.2518  | 12.0377  | 1.87818  | 5.00E-05 | 0.00170056 |
| TCONS_00037389 | XLOC_003418 | -            | 566   | 11.1642  | 128.948  | -3.52984 | 5.00E-05 | 0.00170056 |
| TCONS_00037388 | XLOC_003418 | -            | 788   | 10.2059  | 107.376  | -3.39521 | 5.00E-05 | 0.00170056 |
| NM_005217.3    | 1668        | DEFA3        | 491   | 0        | 16.4563  | #NAME?   | 5.00E-05 | 0.00170056 |
| NM_152750.4    | 222256      | CDHR3        | 6500  | 11.7392  | 50.6512  | -2.10926 | 5.00E-05 | 0.00170056 |
| NM_001200049.1 | 54777       | C10orf92     | 3164  | 1.01772  | 4.63382  | -2.18686 | 5.00E-05 | 0.00170056 |
| TCONS_00053981 | XLOC_004304 | -            | 6951  | 2.09702  | 0.590623 | 1.82804  | 5.00E-05 | 0.00170056 |
| NM_176677.1    | 283948      | NHLRC4       | 2044  | 2.27652  | 6.93709  | -1.60750 | 5.00E-05 | 0.00170056 |
| NM_002438.2    | 4360        | MRC1         | 5171  | 1.85437  | 0.491562 | 1.91549  | 5.00E-05 | 0.00170056 |
| NM_003226.3    | 7033        | TFF3         | 1054  | 104.977  | 17.8191  | 2.55858  | 5.00E-05 | 0.00170056 |
| NM_018365.2    | 55329       | MNS1         | 2023  | 10.8548  | 34.2402  | -1.65736 | 5.00E-05 | 0.00170056 |
| NM_033397.2    | 85450       | ITPRIP       | 4364  | 10.4546  | 2.66226  | 1.97341  | 5.00E-05 | 0.00170056 |
| NM_001162435.2 | 100287718   | LOC100287718 | 1058  | 6.02541  | 23.6331  | -1.97168 | 5.00E-05 | 0.00170056 |
| TCONS_00202192 | XLOC_017222 | -            | 11403 | 2.19586  | 9.68556  | -2.14105 | 5.00E-05 | 0.00170056 |
| NM_004469.4    | 2277        | FIGF         | 2074  | 0.477196 | 3.66238  | -2.94013 | 5.00E-05 | 0.00170056 |
| NM_001008723.1 | 159686      | CCDC147      | 3313  | 3.64312  | 14.4689  | -1.98971 | 5.00E-05 | 0.00170056 |
| XM_003403450.1 | 4586        | MUC5AC       | 6325  | 52.1879  | 13.861   | 1.91268  | 5.00E-05 | 0.00170056 |
| NM_014467.2    | 27286       | SRPX2        | 2190  | 11.3609  | 3.79832  | 1.58065  | 5.00E-05 | 0.00170056 |
| NM_025195.2    | 10221       | TRIB1        | 3633  | 39.9782  | 7.00342  | 2.51308  | 5.00E-05 | 0.00170056 |
| NM_004654.3    | 8287        | USP9Y        | 10040 | 18.879   | 5.59332  | 1.75500  | 5.00E-05 | 0.00170056 |
| XM_003403441.1 | 401258      | RAB44        | 2557  | 4.65397  | 0.638754 | 2.86513  | 5.00E-05 | 0.00170056 |
| NM_152997.2    | 260436      | C4orf7       | 539   | 100.371  | 19.3682  | 2.37358  | 5.00E-05 | 0.00170056 |
| NM_145038.2    | 92749       | CCDC164      | 2491  | 12.9269  | 46.5596  | -1.84870 | 5.00E-05 | 0.00170056 |
| NM_024800.4    | 79858       | NEK11        | 2953  | 7.30507  | 24.9861  | -1.77415 | 5.00E-05 | 0.00170056 |
| NM_001805.2    | 1053        | CEBPE        | 1201  | 8.15414  | 0.574705 | 3.82664  | 5.00E-05 | 0.00170056 |
| NM_014226.1    | 5891        | RAGE         | 1934  | 4.32682  | 14.0841  | -1.70269 | 5.00E-05 | 0.00170056 |
| NM_003253.2    | 7074        | TIAM1        | 7198  | 7.1131   | 2.3964   | 1.56961  | 5.00E-05 | 0.00170056 |
| NM_174892.2    | 124599      | CD300LB      | 2294  | 5.65704  | 0.641764 | 3.13993  | 5.00E-05 | 0.00170056 |
| NM_004049.3    | 597         | BCL2A1       | 887   | 63.1543  | 4.45226  | 3.82627  | 5.00E-05 | 0.00170056 |
| NM_002167.3    | 3399        | ID3          | 1288  | 52.1784  | 18.2642  | 1.51443  | 5.00E-05 | 0.00170056 |
| NM_002318.2    | 4017        | LOXL2        | 3810  | 11.6407  | 2.18705  | 2.41212  | 5.00E-05 | 0.00170056 |
| NM_004670.3    | 9060        | PAPSS2       | 3843  | 15.4756  | 5.99851  | 1.36732  | 5.00E-05 | 0.00170056 |
| NM_001725354.4 | 4584        | MUC3A        | 5765  | 0.132806 | 0.753566 | -2.50441 | 5.00E-05 | 0.00170056 |
| TCONS_00267790 | XLOC_022887 | -            | 1986  | 0.673336 | 4.46003  | -2.72766 | 5.00E-05 | 0.00170056 |
| NM_000963.2    | 5743        | PTGS2        | 4493  | 41.232   | 2.13877  | 4.26891  | 5.00E-05 | 0.00170056 |
| NM_002545.3    | 4978        | OPCML        | 6300  | 0.253342 | 1.04371  | -2.04256 | 5.00E-05 | 0.00170056 |
| NM_001098526.1 | 120425      | AMICA1       | 1957  | 62.688   | 14.4784  | 2.11429  | 5.00E-05 | 0.00170056 |
| NM_004274.4    | 9472        | AKAP6        | 10387 | 5.29712  | 11.8848  | -1.16584 | 5.00E-05 | 0.00170056 |

|                |             |          |       |          |          |          |          |            |
|----------------|-------------|----------|-------|----------|----------|----------|----------|------------|
| NM_005130.3    | 9982        | FGFBP1   | 1182  | 7.63529  | 0.744421 | 3.35849  | 5.00E-05 | 0.00170056 |
| NM_002648.3    | 5292        | PIM1     | 2709  | 31.7851  | 6.26396  | 2.34321  | 5.00E-05 | 0.00170056 |
| NM_006528.2    | 7980        | TFPI2    | 1170  | 0.891779 | 4.94669  | -2.47171 | 5.00E-05 | 0.00170056 |
| NM_004621.5    | 7225        | TRPC6    | 4612  | 7.72301  | 2.66885  | 1.53294  | 5.00E-05 | 0.00170056 |
| NM_012309.3    | 22941       | SHANK2   | 10495 | 2.13441  | 4.74797  | -1.15347 | 5.00E-05 | 0.00170056 |
| NM_012108.2    | 26228       | STAP1    | 1511  | 13.8144  | 5.70392  | 1.27615  | 5.00E-05 | 0.00170056 |
| NM_001039845.1 | 130752      | MDH1B    | 2332  | 8.98692  | 26.8397  | -1.57847 | 5.00E-05 | 0.00170056 |
| NM_000922.3    | 5140        | PDE3B    | 6091  | 8.94566  | 2.87868  | 1.63578  | 5.00E-05 | 0.00170056 |
| NM_000860.4    | 3248        | HPGD     | 2770  | 45.0813  | 13.1485  | 1.77763  | 5.00E-05 | 0.00170056 |
| NM_001004330.2 | 440107      | PLEKHG7  | 3267  | 8.36482  | 24.0215  | -1.52192 | 5.00E-05 | 0.00170056 |
| NM_000064.2    | 718         | C3       | 5101  | 23.4449  | 85.8372  | -1.87233 | 5.00E-05 | 0.00170056 |
| NM_182628.2    | 348807      | CCDC37   | 2086  | 3.32923  | 10.6533  | -1.67804 | 5.00E-05 | 0.00170056 |
| NM_003357.4    | 7356        | SCGB1A1  | 452   | 48.8071  | 2998.95  | -5.94122 | 5.00E-05 | 0.00170056 |
| NM_005195.3    | 1052        | CEBPD    | 1251  | 99.0476  | 45.7298  | 1.11499  | 5.00E-05 | 0.00170056 |
| NM_001002912.4 | 127254      | C1orf173 | 7159  | 12.8494  | 40.3861  | -1.65215 | 5.00E-05 | 0.00170056 |
| NM_000602.3    | 5054        | SERPINE1 | 3181  | 22.7471  | 0.726664 | 4.96825  | 5.00E-05 | 0.00170056 |
| NM_030817.2    | 81575       | APOLD1   | 4646  | 76.8949  | 6.02826  | 3.67307  | 5.00E-05 | 0.00170056 |
| NM_001146187.1 | 5178        | PEG3     | 8375  | 2.35229  | 5.29089  | -1.16944 | 5.00E-05 | 0.00170056 |
| NM_001139490.1 | 26146       | TRAF3IP1 | 3978  | 11.3496  | 22.1968  | -0.96771 | 5.00E-05 | 0.00170056 |
| NM_005737.3    | 10123       | ARL4C    | 4009  | 27.1432  | 10.0159  | 1.43829  | 5.00E-05 | 0.00170056 |
| NM_032048.2    | 84034       | EMILIN2  | 4009  | 16.7502  | 5.86863  | 1.51308  | 5.00E-05 | 0.00170056 |
| NM_005560.3    | 3911        | LAMA5    | 11426 | 7.83795  | 3.92468  | 0.99790  | 5.00E-05 | 0.00170056 |
| NM_133493.3    | 135228      | CD109    | 9447  | 10.9258  | 4.64795  | 1.23307  | 5.00E-05 | 0.00170056 |
| NM_182665.2    | 83593       | RASSF5   | 3514  | 24.6482  | 7.55208  | 1.70653  | 5.00E-05 | 0.00170056 |
| NM_000189.4    | 3099        | HK2      | 7093  | 13.488   | 2.62488  | 2.36135  | 5.00E-05 | 0.00170056 |
| NM_016459.3    | 51237       | MZB1     | 827   | 76.7114  | 25.3635  | 1.59669  | 5.00E-05 | 0.00170056 |
| NM_020826.2    | 57586       | SYT13    | 5157  | 0.166881 | 0.963175 | -2.52898 | 5.00E-05 | 0.00170056 |
| NM_005582.2    | 4064        | CD180    | 2716  | 11.7325  | 3.95623  | 1.56831  | 5.00E-05 | 0.00170056 |
| NM_173812.4    | 283417      | DPY19L2  | 4057  | 2.20282  | 8.58391  | -1.96228 | 5.00E-05 | 0.00170056 |
| NM_015964.2    | 51673       | TPPP3    | 1041  | 43.9425  | 137.903  | -1.64996 | 5.00E-05 | 0.00170056 |
| NM_001992.3    | 2149        | F2R      | 3810  | 35.0886  | 14.6214  | 1.26292  | 5.00E-05 | 0.00170056 |
| NM_001145252.1 | 5199        | CFP      | 1598  | 5.01983  | 1.39269  | 1.84977  | 5.00E-05 | 0.00170056 |
| NM_139285.2    | 246176      | GAS2L2   | 3007  | 2.55213  | 8.46353  | -1.72956 | 5.00E-05 | 0.00170056 |
| NM_001001413.3 | 283767      | GOLGA6L1 | 3822  | 0.173604 | 0.889192 | -2.35669 | 5.00E-05 | 0.00170056 |
| NM_005623.2    | 6355        | CCL8     | 1250  | 8.91826  | 1.16458  | 2.93696  | 5.00E-05 | 0.00170056 |
| NM_032821.2    | 54768       | HYDIN    | 15685 | 3.15632  | 9.86485  | -1.64406 | 5.00E-05 | 0.00170056 |
| NM_015668.3    | 26166       | RGS22    | 4184  | 9.38407  | 28.5281  | -1.60410 | 5.00E-05 | 0.00170056 |
| NM_004235.4    | 9314        | KLF4     | 2933  | 28.586   | 7.09946  | 2.00952  | 5.00E-05 | 0.00170056 |
| NM_001257.4    | 1012        | CDH13    | 4021  | 9.97041  | 3.34009  | 1.57777  | 5.00E-05 | 0.00170056 |
| NM_032581.3    | 84668       | FAM126A  | 6151  | 24.8422  | 13.0555  | 0.92813  | 5.00E-05 | 0.00170056 |
| NM_018010.3    | 55081       | IFT57    | 3203  | 26.8654  | 57.986   | -1.10996 | 5.00E-05 | 0.00170056 |
| NM_001101376.2 | 440585      | FAM183A  | 517   | 14.872   | 43.9075  | -1.56186 | 5.00E-05 | 0.00170056 |
| NM_001001557.2 | 392255      | GDF6     | 3701  | 0.151771 | 1.32606  | -3.12718 | 5.00E-05 | 0.00170056 |
| NM_152572.2    | 158067      | AK8      | 2106  | 2.24374  | 6.85179  | -1.61057 | 5.00E-05 | 0.00170056 |
| NM_004946.2    | 1794        | DOCK2    | 6097  | 34.0545  | 17.1549  | 0.98922  | 5.00E-05 | 0.00170056 |
| TCONS_00155673 | XLOC_013982 | -        | 9015  | 0.546383 | 3.12484  | -2.51580 | 5.00E-05 | 0.00170056 |
| NM_001014440.3 | 440836      | ODF3B    | 970   | 4.62358  | 16.2577  | -1.81404 | 5.00E-05 | 0.00170056 |
| NM_003999.2    | 9180        | OSMR     | 5539  | 36.0999  | 13.1124  | 1.46106  | 5.00E-05 | 0.00170056 |
| NM_052904.3    | 114792      | KLHL32   | 3807  | 1.03989  | 4.80965  | -2.20949 | 5.00E-05 | 0.00170056 |
| NM_004165.2    | 6236        | RRAD     | 1467  | 7.86083  | 24.4382  | -1.63638 | 5.00E-05 | 0.00170056 |
| NM_000801.4    | 2280        | FKBP1A   | 1633  | 73.5474  | 34.8132  | 1.07904  | 5.00E-05 | 0.00170056 |
| NM_020183.3    | 56938       | ARNTL2   | 1930  | 12.6242  | 3.62337  | 1.80079  | 5.00E-05 | 0.00170056 |
| NM_014485.2    | 27306       | HPGDS    | 1615  | 16.8697  | 5.17919  | 1.70364  | 5.00E-05 | 0.00170056 |
| NM_005253.3    | 2355        | FOSL2    | 3991  | 51.0057  | 14.0562  | 1.85945  | 5.00E-05 | 0.00170056 |

|                |             |              |       |          |          |          |          |            |
|----------------|-------------|--------------|-------|----------|----------|----------|----------|------------|
| NM_001184744.1 | 5745        | PTH1R        | 1991  | 1.98806  | 6.44491  | -1.69680 | 5.00E-05 | 0.00170056 |
| NM_004174.2    | 6550        | SLC9A3       | 2777  | 6.17222  | 1.08635  | 2.50630  | 5.00E-05 | 0.00170056 |
| NM_182943.2    | 5352        | PLOD2        | 4060  | 32.1354  | 12.016   | 1.41921  | 5.00E-05 | 0.00170056 |
| TCONS_00220457 | XLOC_019175 | -            | 402   | 0        | 1.76771  | #NAME?   | 5.00E-05 | 0.00170056 |
| NM_002112.3    | 3067        | HDC          | 2644  | 16.561   | 3.65468  | 2.17997  | 5.00E-05 | 0.00170056 |
| NM_000361.2    | 7056        | THBD         | 4032  | 14.9135  | 3.60757  | 2.04751  | 5.00E-05 | 0.00170056 |
| NM_025250.2    | 80727       | TTYH3        | 4822  | 7.22617  | 2.63583  | 1.45498  | 5.00E-05 | 0.00170056 |
| NM_005164.3    | 225         | ABCD2        | 5341  | 2.69717  | 6.283    | -1.22001 | 5.00E-05 | 0.00170056 |
| NM_015515.3    | 25984       | KRT23        | 2147  | 25.4554  | 10.4588  | 1.28325  | 5.00E-05 | 0.00170056 |
| NM_002228.3    | 3725        | JUN          | 3323  | 61.3097  | 21.7503  | 1.49508  | 5.00E-05 | 0.00170056 |
| NM_199478.1    | 5354        | PLP1         | 2921  | 2.1592   | 8.45052  | -1.96854 | 5.00E-05 | 0.00170056 |
| NM_001031743.2 | 154313      | C6orf165     | 2215  | 11.9943  | 45.2977  | -1.91709 | 5.00E-05 | 0.00170056 |
| TCONS_00208641 | XLOC_017561 | -            | 1790  | 7.7598   | 1.14283  | 2.76341  | 5.00E-05 | 0.00170056 |
| NM_032385.3    | 10826       | C5orf4       | 2997  | 9.1989   | 20.1378  | -1.13037 | 5.00E-05 | 0.00170056 |
| NM_024677.4    | 79730       | NSUN7        | 3698  | 6.82306  | 21.2879  | -1.64155 | 5.00E-05 | 0.00170056 |
| NM_004914.2    | 9609        | RAB36        | 3822  | 3.21493  | 7.64637  | -1.24999 | 5.00E-05 | 0.00170056 |
| NM_014996.2    | 23007       | PLCH1        | 6128  | 3.26263  | 9.38505  | -1.52433 | 5.00E-05 | 0.00170056 |
| NM_002863.4    | 5836        | PYGL         | 2846  | 44.2717  | 17.2338  | 1.36114  | 5.00E-05 | 0.00170056 |
| NM_007360.3    | 22914       | KLRK1        | 1589  | 15.9313  | 41.124   | -1.36811 | 5.00E-05 | 0.00170056 |
| NM_001783.3    | 973         | CD79A        | 1258  | 33.8568  | 10.9739  | 1.62537  | 5.00E-05 | 0.00170056 |
| NM_003155.2    | 6781        | STC1         | 3877  | 19.4096  | 6.10944  | 1.66766  | 5.00E-05 | 0.00170056 |
| NM_003777.3    | 8701        | DNAH11       | 14189 | 10.0375  | 33.749   | -1.74945 | 5.00E-05 | 0.00170056 |
| NM_000433.3    | 4688        | NCF2         | 2412  | 59.3687  | 8.00231  | 2.89121  | 5.00E-05 | 0.00170056 |
| NM_012194.2    | 25758       | C11orf41     | 11622 | 0.430519 | 1.69954  | -1.98099 | 5.00E-05 | 0.00170056 |
| NM_030820.3    | 81578       | COL21A1      | 4173  | 4.14476  | 12.6011  | -1.60419 | 5.00E-05 | 0.00170056 |
| NM_002661.2    | 5336        | PLCG2        | 4241  | 21.303   | 8.93604  | 1.25335  | 5.00E-05 | 0.00170056 |
| NM_000239.2    | 4069        | LYZ          | 1516  | 905.233  | 199.578  | 2.18134  | 5.00E-05 | 0.00170056 |
| NM_199280.2    | 165186      | FAM179A      | 3548  | 3.82214  | 10.5229  | -1.46108 | 5.00E-05 | 0.00170056 |
| NM_017691.3    | 54839       | LRRC49       | 2852  | 7.11655  | 17.1808  | -1.27155 | 5.00E-05 | 0.00170056 |
| NM_021073.2    | 653         | BMP5         | 2172  | 27.5571  | 9.13111  | 1.59356  | 5.00E-05 | 0.00170056 |
| TCONS_00218882 | XLOC_018599 | -            | 275   | 0        | 3.24262  | #NAME?   | 5.00E-05 | 0.00170056 |
| NM_024593.3    | 79645       | EFCAB1       | 2144  | 11.5378  | 35.1188  | -1.60588 | 5.00E-05 | 0.00170056 |
| NM_002133.2    | 3162        | HMOX1        | 1590  | 19.0023  | 4.10273  | 2.21152  | 5.00E-05 | 0.00170056 |
| XM_002342853.2 | 100287651   | LOC100287651 | 2337  | 7.29777  | 22.8158  | -1.64451 | 5.00E-05 | 0.00170056 |
| NM_001007540.2 | 389118      | CDHR4        | 2476  | 2.02586  | 7.31362  | -1.85205 | 5.00E-05 | 0.00170056 |
| NM_001763.2    | 909         | CD1A         | 2096  | 2.13867  | 0.263223 | 3.02236  | 5.00E-05 | 0.00170056 |
| NM_002259.4    | 3821        | KLRC1        | 1439  | 2.49625  | 9.98725  | -2.00032 | 5.00E-05 | 0.00170056 |
| NM_001007525.3 | 284434      | NWD1         | 7645  | 19.8493  | 43.0126  | -1.11567 | 5.00E-05 | 0.00170056 |
| NM_000669.3    | 126         | ADH1C        | 1473  | 241.235  | 106.534  | 1.17912  | 5.00E-05 | 0.00170056 |
| NM_006981.3    | 8013        | NR4A3        | 5634  | 32.0708  | 0.910099 | 5.13909  | 5.00E-05 | 0.00170056 |
| NM_174858.2    | 26289       | AK5          | 3325  | 21.9522  | 4.88983  | 2.16651  | 5.00E-05 | 0.00170056 |
| NM_031938.4    | 83875       | BCO2         | 2912  | 2.9009   | 8.27003  | -1.51139 | 5.00E-05 | 0.00170056 |
| NM_017423.2    | 51809       | GALNT7       | 4307  | 27.9977  | 11.8354  | 1.24221  | 5.00E-05 | 0.00170056 |
| NM_138796.2    | 128153      | SPATA17      | 1235  | 13.7523  | 45.3862  | -1.72258 | 5.00E-05 | 0.00170056 |
| NM_178499.3    | 160777      | CCDC60       | 2450  | 4.11661  | 11.6155  | -1.49652 | 5.00E-05 | 0.00170056 |
| NM_181807.3    | 341019      | DCDC1        | 1742  | 4.88631  | 21.0786  | -2.10896 | 5.00E-05 | 0.00170056 |
| NM_032866.3    | 84952       | CGNL1        | 7157  | 5.08269  | 11.4595  | -1.17288 | 5.00E-05 | 0.00170056 |
| NM_001011552.3 | 389015      | SLC9A4       | 4138  | 3.07666  | 7.86574  | -1.35422 | 5.00E-05 | 0.00170056 |
| NM_002427.3    | 4322        | MMP13        | 2719  | 0.874896 | 159.113  | -7.50672 | 5.00E-05 | 0.00170056 |
| NM_173672.4    | 285755      | PPIL6        | 4128  | 5.46926  | 20.3886  | -1.89835 | 5.00E-05 | 0.00170056 |
| NM_001565.3    | 3627        | CXCL10       | 1216  | 2.8455   | 16.4535  | -2.53164 | 5.00E-05 | 0.00170056 |
| NM_031456.3    | 10517       | FBXW10       | 3439  | 0.687069 | 3.57936  | -2.38117 | 5.00E-05 | 0.00170056 |
| NM_002429.4    | 4327        | MMP19        | 3254  | 13.0461  | 3.55587  | 1.87534  | 5.00E-05 | 0.00170056 |
| NM_153490.2    | 3860        | KRT13        | 1715  | 3.097    | 0.675297 | 2.19728  | 5.00E-05 | 0.00170056 |

|                |             |              |       |          |          |          |          |            |
|----------------|-------------|--------------|-------|----------|----------|----------|----------|------------|
| NM_182493.2    | 91807       | MYLK3        | 7998  | 0.309853 | 1.24804  | -2.01001 | 5.00E-05 | 0.00170056 |
| NM_024806.2    | 79864       | C11orf63     | 2911  | 4.32178  | 11.4772  | -1.40908 | 5.00E-05 | 0.00170056 |
| XM_003403447.1 | 100652938   | LOC100652938 | 5295  | 15.0552  | 4.01624  | 1.90634  | 5.00E-05 | 0.00170056 |
| NM_014470.3    | 27289       | RND1         | 1665  | 3.59408  | 0.640076 | 2.48931  | 5.00E-05 | 0.00170056 |
| NM_002976.3    | 6332        | SCN7A        | 7186  | 0.456659 | 3.11981  | -2.77227 | 5.00E-05 | 0.00170056 |
| NM_001530.3    | 3091        | HIF1A        | 4059  | 109.259  | 37.4411  | 1.54506  | 5.00E-05 | 0.00170056 |
| NM_000953.2    | 5729        | PTGDR        | 2942  | 3.84594  | 11.9824  | -1.63951 | 5.00E-05 | 0.00170056 |
| NM_005507.2    | 1072        | CFL1         | 1260  | 183.278  | 85.6049  | 1.09827  | 5.00E-05 | 0.00170056 |
| NM_015444.2    | 25907       | TMEM158      | 1859  | 3.13113  | 0.548307 | 2.51363  | 5.00E-05 | 0.00170056 |
| TCONS_00233089 | XLOC_020133 | -            | 2857  | 0.613124 | 3.05482  | -2.31683 | 5.00E-05 | 0.00170056 |
| NM_198559.1    | 375307      | C2orf62      | 1323  | 1.10026  | 5.26243  | -2.25789 | 5.00E-05 | 0.00170056 |
| NM_018965.2    | 54209       | TREM2        | 1051  | 11.5915  | 2.19329  | 2.40190  | 5.00E-05 | 0.00170056 |
| NM_000528.3    | 4125        | MAN2B1       | 3224  | 31.3591  | 14.3094  | 1.13192  | 5.00E-05 | 0.00170056 |
| NM_023036.4    | 64446       | DNAI2        | 2279  | 3.21297  | 11.0471  | -1.78169 | 5.00E-05 | 0.00170056 |
| NM_172218.2    | 6674        | SPAG1        | 3749  | 10.1689  | 22.9635  | -1.17518 | 5.00E-05 | 0.00170056 |
| NM_004288.4    | 9595        | CYTIP        | 2210  | 59.8032  | 26.2065  | 1.19030  | 5.00E-05 | 0.00170056 |
| NM_002357.3    | 4084        | MXD1         | 5617  | 28.2796  | 4.50872  | 2.64897  | 5.00E-05 | 0.00170056 |
| NM_019074.3    | 54567       | DLL4         | 3420  | 6.17687  | 2.12183  | 1.54156  | 5.00E-05 | 0.00170056 |
| NM_001781.2    | 969         | CD69         | 1676  | 260.814  | 14.1771  | 4.20138  | 5.00E-05 | 0.00170056 |
| NM_020877.2    | 146754      | DNAH2        | 13505 | 3.60199  | 10.7199  | -1.57343 | 5.00E-05 | 0.00170056 |
| NM_001124.1    | 133         | ADM          | 1449  | 21.7287  | 2.81998  | 2.94584  | 5.00E-05 | 0.00170056 |
| NM_014429.3    | 27136       | MORC1        | 3768  | 1.35126  | 0.142655 | 3.24370  | 5.00E-05 | 0.00170056 |
| NM_032532.2    | 84624       | WRDC1        | 6551  | 1.57238  | 4.36865  | -1.47424 | 5.00E-05 | 0.00170056 |
| NM_025145.5    | 80217       | WDR96        | 5365  | 18.3587  | 83.2516  | -2.18101 | 5.00E-05 | 0.00170056 |
| NM_130830.4    | 131578      | LRRC15       | 5883  | 0.928249 | 4.55081  | -2.29354 | 5.00E-05 | 0.00170056 |
| NM_133459.3    | 147372      | CCBE1        | 6260  | 0.377326 | 3.31121  | -3.13348 | 5.00E-05 | 0.00170056 |
| TCONS_00220371 | XLOC_019087 | -            | 305   | 0        | 2.19441  | #NAME?   | 5.00E-05 | 0.00170056 |
| NM_001145128.2 | 221264      | AKD1         | 6326  | 4.47272  | 13.4382  | -1.58711 | 5.00E-05 | 0.00170056 |
| NM_006406.1    | 10549       | PRDX4        | 921   | 87.0289  | 34.3174  | 1.34255  | 5.00E-05 | 0.00170056 |
| NM_001164496.1 | 55779       | WDR52        | 10259 | 11.5324  | 27.2283  | -1.23941 | 5.00E-05 | 0.00170056 |
| NM_001098843.3 | 645090      | CXorf30      | 2863  | 3.5013   | 15.3101  | -2.12852 | 5.00E-05 | 0.00170056 |
| NM_018492.2    | 55872       | PBK          | 1854  | 5.34837  | 1.08881  | 2.29634  | 5.00E-05 | 0.00170056 |
| TCONS_00053726 | XLOC_003947 | -            | 4699  | 1.79331  | 7.38542  | -2.04206 | 5.00E-05 | 0.00170056 |
| NM_006235.2    | 5450        | POU2AF1      | 3032  | 9.76899  | 3.01664  | 1.69526  | 5.00E-05 | 0.00170056 |
| NM_015417.4    | 25876       | SPEF1        | 1587  | 2.90409  | 8.50344  | -1.54996 | 5.00E-05 | 0.00170056 |
| NM_005554.3    | 3853        | KRT6A        | 2450  | 21.7183  | 1.69885  | 3.67628  | 5.00E-05 | 0.00170056 |
| NM_012293.1    | 7837        | PXDN         | 6821  | 12.625   | 6.32055  | 0.99816  | 5.00E-05 | 0.00170056 |
| NM_001765.2    | 911         | CD1C         | 2592  | 10.6383  | 2.86812  | 1.89109  | 5.00E-05 | 0.00170056 |
| TCONS_00081893 | XLOC_006697 | -            | 5183  | 1.2034   | 4.44295  | -1.88441 | 5.00E-05 | 0.00170056 |
| NM_024430.3    | 9050        | PSTPIP2      | 3024  | 15.6929  | 6.09828  | 1.36364  | 5.00E-05 | 0.00170056 |
| NM_022486.3    | 64420       | SUSD1        | 2996  | 20.4848  | 8.2787   | 1.30708  | 5.00E-05 | 0.00170056 |
| NM_001089584.1 | 134121      | C5orf49      | 1026  | 9.71501  | 34.1739  | -1.81461 | 5.00E-05 | 0.00170056 |
| NM_000677.3    | 140         | ADORA3       | 2245  | 11.4677  | 2.2349   | 2.35929  | 5.00E-05 | 0.00170056 |
| NM_017539.1    | 55567       | DNAH3        | 12351 | 9.27592  | 26.9087  | -1.53651 | 5.00E-05 | 0.00170056 |
| NM_145793.3    | 2674        | GFRA1        | 9134  | 8.34266  | 27.8384  | -1.73850 | 5.00E-05 | 0.00170056 |
| NM_001172129.1 | 3055        | HCK          | 2155  | 14.9061  | 4.50093  | 1.72761  | 5.00E-05 | 0.00170056 |
| NM_000313.3    | 5627        | PROS1        | 3580  | 22.5316  | 60.5745  | -1.42676 | 5.00E-05 | 0.00170056 |
| NM_001152.4    | 292         | SLC25A5      | 1351  | 99.3271  | 45.4862  | 1.12676  | 5.00E-05 | 0.00170056 |
| NM_182705.2    | 359845      | FAM101B      | 3622  | 24.8298  | 7.04938  | 1.81650  | 5.00E-05 | 0.00170056 |
| NM_005651.2    | 6999        | TDO2         | 1693  | 4.21725  | 0.56747  | 2.89369  | 5.00E-05 | 0.00170056 |
| NM_000640.2    | 3598        | IL13RA2      | 1373  | 2.78497  | 0.485056 | 2.52144  | 5.00E-05 | 0.00170056 |
| NM_182791.2    | 80125       | CCDC33       | 2104  | 2.22516  | 10.9483  | -2.29872 | 5.00E-05 | 0.00170056 |
| NM_001164436.1 | 389177      | TMEM212      | 1881  | 7.27232  | 25.8788  | -1.83128 | 5.00E-05 | 0.00170056 |
| NM_000959.3    | 5737        | PTGFR        | 5360  | 7.57653  | 16.833   | -1.15168 | 5.00E-05 | 0.00170056 |

|                |             |              |       |          |          |          |          |            |
|----------------|-------------|--------------|-------|----------|----------|----------|----------|------------|
| NM_001007156.1 | 4916        | NTRK3        | 3982  | 1.92985  | 6.62195  | -1.77877 | 5.00E-05 | 0.00170056 |
| NM_002928.3    | 6004        | RGS16        | 2432  | 23.6673  | 1.82997  | 3.69300  | 5.00E-05 | 0.00170056 |
| NM_020974.2    | 57758       | SCUBE2       | 4536  | 1.66733  | 6.48128  | -1.95874 | 5.00E-05 | 0.00170056 |
| NM_020893.2    | 100499483   | C9orf174     | 5635  | 5.77593  | 14.0872  | -1.28626 | 5.00E-05 | 0.00170056 |
| NM_032119.3    | 84059       | GPR98        | 19333 | 3.9328   | 18.2589  | -2.21497 | 5.00E-05 | 0.00170056 |
| NM_001814.4    | 1075        | CTSC         | 1907  | 359.574  | 63.5718  | 2.49983  | 5.00E-05 | 0.00170056 |
| NM_031422.4    | 83539       | CHST9        | 2246  | 49.8727  | 118.083  | -1.24347 | 5.00E-05 | 0.00170056 |
| NM_000916.3    | 5021        | OXTR         | 4361  | 46.165   | 13.7939  | 1.74277  | 5.00E-05 | 0.00170056 |
| NM_152327.2    | 122481      | AK7          | 2648  | 12.4514  | 33.1068  | -1.41082 | 5.00E-05 | 0.00170056 |
| XM_003403451.1 | 100508736   | LOC100508736 | 1567  | 5.48834  | 19.0839  | -1.79792 | 5.00E-05 | 0.00170056 |
| NM_002029.3    | 2357        | FPR1         | 1317  | 15.3973  | 2.93228  | 2.39258  | 5.00E-05 | 0.00170056 |
| NM_001254.3    | 990         | CDC6         | 3053  | 2.98069  | 0.813722 | 1.87304  | 5.00E-05 | 0.00170056 |
| NM_199327.1    | 10252       | SPRY1        | 2348  | 63.8487  | 23.0045  | 1.47274  | 5.00E-05 | 0.00170056 |
| NM_006169.2    | 4837        | NNMT         | 1578  | 37.273   | 9.3379   | 1.99696  | 5.00E-05 | 0.00170056 |
| NM_147195.2    | 253650      | ANKRD18A     | 3738  | 6.18273  | 14.4507  | -1.22483 | 5.00E-05 | 0.00170056 |
| NM_153362.2    | 167681      | PRSS35       | 2503  | 1.18412  | 5.56998  | -2.23386 | 5.00E-05 | 0.00170056 |
| NM_030782.3    | 81037       | CLPTM1L      | 2148  | 42.3752  | 20.7687  | 1.02881  | 5.00E-05 | 0.00170056 |
| NM_025132.3    | 57728       | WDR19        | 4520  | 12.4784  | 26.7533  | -1.10029 | 5.00E-05 | 0.00170056 |
| NM_003373.3    | 7414        | VCL          | 5286  | 61.1001  | 28.3476  | 1.10795  | 5.00E-05 | 0.00170056 |
| NM_147168.1    | 84688       | C9orf24      | 712   | 14.3379  | 52.5111  | -1.87279 | 5.00E-05 | 0.00170056 |
| NM_001136570.1 | 100129583   | FAM47E       | 1550  | 5.55954  | 14.9665  | -1.42870 | 5.00E-05 | 0.00170056 |
| NM_021254.2    | 56683       | C21orf59     | 1427  | 32.1281  | 64.5586  | -1.00677 | 5.00E-05 | 0.00170056 |
| NM_199166.1    | 211         | ALAS1        | 2258  | 45.5571  | 15.8019  | 1.52758  | 5.00E-05 | 0.00170056 |
| TCONS_00207680 | XLOC_017712 | -            | 4806  | 4.42183  | 0.492154 | 3.16746  | 5.00E-05 | 0.00170056 |
| NM_001031716.2 | 64859       | OBFC2A       | 3849  | 56.9536  | 22.2308  | 1.35723  | 5.00E-05 | 0.00170056 |
| NM_144577.3    | 93233       | CCDC114      | 3220  | 2.15727  | 9.73158  | -2.17346 | 5.00E-05 | 0.00170056 |
| NM_152732.4    | 221421      | RSPH9        | 962   | 6.50942  | 19.4198  | -1.57693 | 5.00E-05 | 0.00170056 |
| NM_001195811.1 | 200150      | PLD5         | 3018  | 0.587491 | 7.00164  | -3.57505 | 5.00E-05 | 0.00170056 |
| NM_001884.3    | 1404        | HAPLN1       | 4678  | 1.84705  | 6.04425  | -1.71034 | 5.00E-05 | 0.00170056 |
| NM_025153.2    | 23120       | ATP10B       | 7566  | 2.20884  | 0.633624 | 1.80159  | 5.00E-05 | 0.00170056 |
| NM_016644.1    | 51334       | PRR16        | 1764  | 2.36126  | 0.422426 | 2.48279  | 5.00E-05 | 0.00170056 |
| NM_001085447.1 | 129881      | C2orf77      | 2169  | 6.0993   | 21.6062  | -1.82473 | 5.00E-05 | 0.00170056 |
| NM_001080508.1 | 9096        | TBX18        | 4070  | 2.05212  | 5.73194  | -1.48191 | 5.00E-05 | 0.00170056 |
| TCONS_00154706 | XLOC_014975 | -            | 16334 | 1.49395  | 6.16537  | -2.04506 | 5.00E-05 | 0.00170056 |
| NM_001080534.1 | 440279      | UNC13C       | 8140  | 1.18901  | 4.96343  | -2.06158 | 5.00E-05 | 0.00170056 |
| NM_022073.3    | 112399      | EGLN3        | 2722  | 22.4964  | 6.64     | 1.76044  | 5.00E-05 | 0.00170056 |
| NM_005630.2    | 6578        | SLCO2A1      | 4223  | 5.5696   | 2.19121  | 1.34585  | 5.00E-05 | 0.00170056 |
| NM_024753.3    | 79809       | TTC21B       | 4896  | 16.9501  | 36.2129  | -1.09521 | 5.00E-05 | 0.00170056 |
| NM_002922.3    | 5996        | RGS1         | 1403  | 201.782  | 19.2747  | 3.38802  | 5.00E-05 | 0.00170056 |
| NM_001080537.1 | 132203      | SNTN         | 1586  | 40.4648  | 154.448  | -1.93238 | 5.00E-05 | 0.00170056 |
| NM_002985.2    | 6352        | CCL5         | 1230  | 43.0121  | 110.747  | -1.36446 | 5.00E-05 | 0.00170056 |
| NM_152367.2    | 126868      | MAB21L3      | 3229  | 14.9894  | 37.8134  | -1.33495 | 5.00E-05 | 0.00170056 |
| NM_002864.2    | 5858        | PZP          | 4610  | 2.85142  | 10.6603  | -1.90249 | 5.00E-05 | 0.00170056 |
| NM_174975.4    | 266629      | SEC14L3      | 2084  | 10.9827  | 54.4952  | -2.31090 | 5.00E-05 | 0.00170056 |
| NM_006183.4    | 4922        | NTS          | 1239  | 61.706   | 20.3172  | 1.60271  | 5.00E-05 | 0.00170056 |
| NM_005354.4    | 3727        | JUND         | 1870  | 42.6208  | 15.8948  | 1.42300  | 5.00E-05 | 0.00170056 |
| NM_004065.2    | 1038        | CDR1         | 1299  | 8.47655  | 40.7513  | -2.26530 | 5.00E-05 | 0.00170056 |
| NM_170776.4    | 222487      | GPR97        | 2670  | 6.75829  | 0.353209 | 4.25806  | 5.00E-05 | 0.00170056 |
| NM_001263.3    | 1040        | CDS1         | 4538  | 14.0527  | 32.1531  | -1.19411 | 5.00E-05 | 0.00170056 |
| NM_006108.2    | 10418       | SPON1        | 5384  | 52.9175  | 16.66    | 1.66735  | 5.00E-05 | 0.00170056 |
| NM_030906.2    | 65975       | STK33        | 2707  | 8.00722  | 29.7608  | -1.89404 | 5.00E-05 | 0.00170056 |
| NM_145071.2    | 1154        | CISH         | 2111  | 10.8068  | 1.84172  | 2.55282  | 5.00E-05 | 0.00170056 |
| NM_032411.2    | 84417       | C2orf40      | 784   | 5.69538  | 22.1256  | -1.95786 | 5.00E-05 | 0.00170056 |
| NM_005978.3    | 6273        | S100A2       | 963   | 129.743  | 23.2854  | 2.47816  | 5.00E-05 | 0.00170056 |

|                |             |          |       |           |          |          |          |            |
|----------------|-------------|----------|-------|-----------|----------|----------|----------|------------|
| NM_152548.2    | 153643      | FAM81B   | 1563  | 13.7941   | 48.326   | -1.80875 | 5.00E-05 | 0.00170056 |
| NM_178483.2    | 140856      | C20orf79 | 667   | 0         | 0.740227 | #NAME?   | 5.00E-05 | 0.00170056 |
| NM_017625.2    | 55600       | ITLN1    | 1182  | 27.4677   | 2.54582  | 3.43153  | 5.00E-05 | 0.00170056 |
| NM_004258.3    | 9398        | CD101    | 3547  | 6.52588   | 1.3291   | 1.61335  | 5.00E-05 | 0.00170056 |
| NM_024329.5    | 79180       | EFHD2    | 2419  | 29.5684   | 12.1345  | 1.28494  | 5.00E-05 | 0.00170056 |
| NM_005114.2    | 9957        | HS3ST1   | 1965  | 25.9978   | 6.63289  | 1.97068  | 5.00E-05 | 0.00170056 |
| 28526          | 28526       | -        | 1510  | 8.43269   | 2.50311  | 1.75227  | 5.00E-05 | 0.00170056 |
| NM_022097.2    | 63928       | CHP2     | 2366  | 2.0191    | 12.9581  | -2.68206 | 5.00E-05 | 0.00170056 |
| 3494           | 3494        | -        | 1019  | 726.672   | 93.4102  | 2.95965  | 5.00E-05 | 0.00170056 |
| NM_006379.3    | 10512       | SEMA3C   | 5174  | 30.4788   | 60.0215  | -0.97767 | 5.00E-05 | 0.00170056 |
| NM_001048265.1 | 138162      | C9orf116 | 722   | 15.5363   | 43.0468  | -1.47026 | 5.00E-05 | 0.00170056 |
| NM_178824.3    | 151790      | WDR49    | 2594  | 12.7196   | 46.9505  | -1.88409 | 5.00E-05 | 0.00170056 |
| NM_152325.1    | 122046      | C13orf26 | 998   | 13.8285   | 45.9125  | -1.73124 | 5.00E-05 | 0.00170056 |
| NM_198285.2    | 349136      | WDR86    | 2041  | 8.14617   | 25.095   | -1.62320 | 5.00E-05 | 0.00170056 |
| NM_178550.4    | 339512      | C1orf110 | 1552  | 13.6729   | 39.6337  | -1.53541 | 5.00E-05 | 0.00170056 |
| NM_024721.4    | 79776       | ZFHX4    | 13958 | 3.27587   | 9.54205  | -1.54242 | 5.00E-05 | 0.00170056 |
| NM_004944.2    | 1776        | DNASE1L3 | 1463  | 5.40095   | 19.5908  | -1.85889 | 5.00E-05 | 0.00170056 |
| NM_024422.3    | 1824        | DSC2     | 5199  | 12.3131   | 2.49327  | 2.30409  | 5.00E-05 | 0.00170056 |
| NM_014957.2    | 22898       | DENND3   | 5444  | 8.37843   | 3.99823  | 1.06732  | 5.00E-05 | 0.00170056 |
| NM_001077418.1 | 79583       | TMEM231  | 2891  | 12.4892   | 30.8602  | -1.30506 | 5.00E-05 | 0.00170056 |
| NM_012301.3    | 9863        | MAGI2    | 6880  | 2.93304   | 6.31978  | -1.10748 | 5.00E-05 | 0.00170056 |
| NM_005306.2    | 2867        | FFAR2    | 2053  | 9.19102   | 0.522918 | 4.13557  | 5.00E-05 | 0.00170056 |
| NM_025159.2    | 80231       | CXorf21  | 1927  | 9.49256   | 3.16143  | 1.58622  | 5.00E-05 | 0.00170056 |
| TCONS_00293562 | XLOC_025465 | -        | 11650 | 0.61966   | 3.32453  | -2.42360 | 5.00E-05 | 0.00170056 |
| NM_173354.3    | 150094      | SIK1     | 4706  | 45.1877   | 4.40303  | 3.35936  | 5.00E-05 | 0.00170056 |
| NM_001099677.1 | 57604       | KIAA1456 | 9300  | 3.24096   | 9.92966  | -1.61532 | 5.00E-05 | 0.00170056 |
| NM_174896.2    | 128346      | C1orf162 | 917   | 23.6861   | 6.99427  | 1.75980  | 5.00E-05 | 0.00170056 |
| NM_001792.3    | 1000        | CDH2     | 4367  | 1.61473   | 5.61369  | -1.79766 | 5.00E-05 | 0.00170056 |
| NM_004588.4    | 6327        | SCN2B    | 4922  | 0.499338  | 1.60203  | -1.68181 | 5.00E-05 | 0.00170056 |
| NM_001101312.1 | 28959       | TMEM176B | 1298  | 57.5183   | 19.574   | 1.55508  | 5.00E-05 | 0.00170056 |
| NM_006269.1    | 6101        | RP1      | 7100  | 6.13558   | 18.6022  | -1.60020 | 5.00E-05 | 0.00170056 |
| NM_016270.2    | 10365       | KLF2     | 1655  | 26.6601   | 8.23676  | 1.69453  | 5.00E-05 | 0.00170056 |
| NM_173615.3    | 146177      | VWA3A    | 4600  | 3.97837   | 11.1983  | -1.49303 | 5.00E-05 | 0.00170056 |
| NM_001558.3    | 3587        | IL10RA   | 3656  | 24.6936   | 8.54456  | 1.53106  | 5.00E-05 | 0.00170056 |
| NM_000211.3    | 3689        | ITGB2    | 2958  | 37.2093   | 12.9395  | 1.52388  | 5.00E-05 | 0.00170056 |
| NM_022785.3    | 64800       | EFCAB6   | 4929  | 3.73487   | 11.1985  | -1.58417 | 5.00E-05 | 0.00170056 |
| NM_005252.3    | 2353        | FOS      | 2158  | 486.04    | 7.21553  | 6.07382  | 5.00E-05 | 0.00170056 |
| NM_017950.2    | 55036       | CCDC40   | 4294  | 2.94344   | 8.18152  | -1.47486 | 5.00E-05 | 0.00170056 |
| NM_000576.2    | 3553        | IL1B     | 1498  | 3.1396    | 0.462931 | 2.76171  | 5.00E-05 | 0.00170056 |
| NM_001099697.1 | 728194      | RSPH10B2 | 3106  | 0.805435  | 3.44001  | -2.09457 | 5.00E-05 | 0.00170056 |
| NM_006763.2    | 7832        | BTG2     | 2712  | 210.617   | 46.769   | 2.17100  | 5.00E-05 | 0.00170056 |
| NM_024763.4    | 79819       | WDR78    | 3848  | 15.1305   | 49.2454  | -1.70253 | 5.00E-05 | 0.00170056 |
| NM_030810.3    | 81567       | TXNDC5   | 3231  | 313.722   | 108.516  | 1.53158  | 5.00E-05 | 0.00170056 |
| NM_002457.2    | 4583        | MUC2     | 8623  | 1.39396   | 0.208277 | 2.74262  | 5.00E-05 | 0.00170056 |
| NM_000146.3    | 2512        | FTL      | 871   | 1494.3    | 576.283  | 1.37462  | 5.00E-05 | 0.00170056 |
| NM_000766.3    | 1553        | CYP2A13  | 1747  | 5.61842   | 19.9971  | -1.83156 | 5.00E-05 | 0.00170056 |
| NM_003486.5    | 8140        | SLC7A5   | 4543  | 2.58157   | 0.764083 | 1.75645  | 5.00E-05 | 0.00170056 |
| NM_032525.1    | 84617       | TUBB6    | 1815  | 22.4238   | 9.817    | 1.19168  | 5.00E-05 | 0.00170056 |
| NM_005290.1    | 2838        | GPR15    | 1083  | 5.75576   | 0.753787 | 2.93278  | 5.00E-05 | 0.00170056 |
| NM_006875.3    | 11040       | PIM2     | 2187  | 61.1768   | 7.95323  | 2.94337  | 5.00E-05 | 0.00170056 |
| NM_153221.2    | 148113      | CILP2    | 4199  | 0.0646116 | 2.31852  | -5.16527 | 5.00E-05 | 0.00170056 |
| NM_021103.3    | 9168        | TMSB10   | 482   | 1244.13   | 601.074  | 1.04952  | 5.00E-05 | 0.00170056 |
| NM_021902.2    | 5348        | FXD1     | 513   | 3.476     | 16.6008  | -2.25576 | 5.00E-05 | 0.00170056 |
| NM_024783.3    | 79841       | AGBL2    | 3593  | 4.97866   | 16.3753  | -1.71769 | 5.00E-05 | 0.00170056 |

|                |             |              |       |          |          |          |          |            |
|----------------|-------------|--------------|-------|----------|----------|----------|----------|------------|
| NM_004077.2    | 1431        | CS           | 2976  | 36.9664  | 19.2655  | 0.94019  | 5.00E-05 | 0.00170056 |
| NM_001199201.1 | 79740       | ZBBX         | 3363  | 13.8194  | 62.7037  | -2.18186 | 5.00E-05 | 0.00170056 |
| NM_182508.2    | 144809      | C13orf30     | 3302  | 35.1799  | 131.98   | -1.90750 | 5.00E-05 | 0.00170056 |
| NM_001085.4    | 12          | SERPINA3     | 1590  | 469.152  | 14.9471  | 4.97211  | 5.00E-05 | 0.00170056 |
| TCONS_00070151 | XLOC_006346 | -            | 298   | 3.1271   | 0        | inf      | 5.00E-05 | 0.00170056 |
| NM_001206485.1 | 467         | ATF3         | 3172  | 15.2178  | 0.950699 | 4.00063  | 5.00E-05 | 0.00170056 |
| NM_145278.3    | 148823      | C1orf150     | 2626  | 3.94641  | 0.969398 | 2.02538  | 5.00E-05 | 0.00170056 |
| NM_020672.1    | 57402       | S100A14      | 1043  | 36.358   | 13.6965  | 1.40847  | 5.00E-05 | 0.00170056 |
| NM_207647.2    | 83856       | FSD1L        | 4295  | 5.24929  | 13.64    | -1.37765 | 5.00E-05 | 0.00170056 |
| NM_000698.2    | 240         | ALOX5        | 2554  | 21.4268  | 6.86329  | 1.64244  | 5.00E-05 | 0.00170056 |
| NM_014648.3    | 9666        | DZIP3        | 5542  | 20.1262  | 41.8695  | -1.05683 | 5.00E-05 | 0.00170056 |
| NM_017576.1    | 55582       | KIF27        | 4653  | 13.1358  | 30.8192  | -1.23033 | 5.00E-05 | 0.00170056 |
| NM_006088.5    | 10383       | TUBB2C       | 1591  | 115.61   | 282.231  | -1.28761 | 5.00E-05 | 0.00170056 |
| NM_005655.2    | 7071        | KLF10        | 2952  | 34.0612  | 15.306   | 1.15404  | 5.00E-05 | 0.00170056 |
| NM_002089.3    | 2920        | CXCL2        | 1205  | 67.4621  | 1.4232   | 5.56687  | 5.00E-05 | 0.00170056 |
| NM_000949.5    | 5618        | PRLR         | 11817 | 4.6013   | 15.3758  | -1.74054 | 5.00E-05 | 0.00170056 |
| NM_001010892.2 | 345895      | RSRH4A       | 2840  | 19.0418  | 66.7788  | -1.81022 | 5.00E-05 | 0.00170056 |
| NM_020817.1    | 57577       | KIAA1407     | 3976  | 6.68479  | 15.1402  | -1.17943 | 5.00E-05 | 0.00170056 |
| XM_003403420.1 | 100652824   | LOC100652824 | 2446  | 4.16815  | 11.9282  | -1.51689 | 5.00E-05 | 0.00170056 |
| NM_012337.2    | 25790       | CCDC19       | 1795  | 10.0455  | 36.9839  | -1.88036 | 5.00E-05 | 0.00170056 |
| NM_001898.2    | 1469        | CST1         | 760   | 985.484  | 0.853001 | 10.17410 | 5.00E-05 | 0.00170056 |
| NM_003537.3    | 8358        | HIST1H3B     | 472   | 50.0093  | 15.5455  | 1.68570  | 5.00E-05 | 0.00170056 |
| NM_001442.2    | 2167        | FABP4        | 838   | 4.04084  | 34.3176  | -3.08622 | 5.00E-05 | 0.00170056 |
| NM_001145450.1 | 729967      | MORN2        | 741   | 43.5044  | 120.284  | -1.46721 | 5.00E-05 | 0.00170056 |
| NM_000668.4    | 125         | ADH1B        | 2682  | 1.79125  | 10.3051  | -2.52432 | 5.00E-05 | 0.00170056 |
| NM_001974.3    | 2015        | EMR1         | 3123  | 19.6724  | 0.317868 | 5.95161  | 5.00E-05 | 0.00170056 |
| NM_004040.2    | 388         | RHOB         | 2367  | 151.131  | 50.4514  | 1.58283  | 5.00E-05 | 0.00170056 |
| NM_003105.5    | 6653        | SORL1        | 10973 | 52.9616  | 25.5343  | 1.05251  | 5.00E-05 | 0.00170056 |
| NM_058180.3    | 54058       | C21orf58     | 2968  | 2.206    | 5.67624  | -1.36350 | 5.00E-05 | 0.00170056 |
| NM_001190766.1 | 401236      | FLJ23152     | 1322  | 4.34761  | 20.5359  | -2.23985 | 5.00E-05 | 0.00170056 |
| NM_014220.2    | 4071        | TM4SF1       | 1691  | 88.6085  | 43.5195  | 1.02578  | 5.00E-05 | 0.00170056 |
| TCONS_00062536 | XLOC_005694 | -            | 16273 | 8.1145   | 2.13204  | 1.92826  | 5.00E-05 | 0.00170056 |
| NM_138426.2    | 113263      | GLCC11       | 4745  | 16.8508  | 7.93569  | 1.08639  | 5.00E-05 | 0.00170056 |
| NM_015567.1    | 26050       | SLITRK5      | 4447  | 0.440055 | 1.84651  | -2.06905 | 5.00E-05 | 0.00170056 |
| NM_144992.4    | 200403      | VWA3B        | 4747  | 5.95631  | 18.6574  | -1.64726 | 5.00E-05 | 0.00170056 |
| NM_080283.3    | 10350       | ABCA9        | 6301  | 3.89484  | 10.4484  | -1.42365 | 5.00E-05 | 0.00170056 |
| NM_148975.1    | 51338       | MS4A4A       | 1524  | 37.2877  | 15.2907  | 1.28605  | 5.00E-05 | 0.00170056 |
| NM_016529.4    | 51761       | ATP8A2       | 5006  | 4.69777  | 0.805169 | 2.54461  | 5.00E-05 | 0.00170056 |
| NM_031457.1    | 83661       | MS4A8B       | 1353  | 15.5796  | 72.4867  | -2.21806 | 5.00E-05 | 0.00170056 |
| NM_000573.3    | 1378        | CR1          | 8616  | 13.4739  | 1.75544  | 2.94027  | 5.00E-05 | 0.00170056 |
| NM_031421.2    | 83538       | TTC25        | 2078  | 6.28726  | 19.8752  | -1.66047 | 5.00E-05 | 0.00170056 |
| NM_173554.2    | 219621      | C10orf107    | 1252  | 16.1576  | 39.0965  | -1.27482 | 5.00E-05 | 0.00170056 |
| NM_003469.4    | 7857        | SCG2         | 2572  | 88.0674  | 20.8374  | 2.07944  | 5.00E-05 | 0.00170056 |
| NM_001012502.2 | 286207      | C9orf117     | 1722  | 5.48466  | 28.102   | -2.35720 | 5.00E-05 | 0.00170056 |
| NM_000574.3    | 1604        | CD55         | 2796  | 68.7664  | 21.4055  | 1.68372  | 5.00E-05 | 0.00170056 |
| NM_000204.3    | 3426        | CFI          | 2161  | 127.844  | 59.5322  | 1.10264  | 5.00E-05 | 0.00170056 |
| NM_001031715.2 | 64799       | IQCH         | 4239  | 2.66142  | 7.52865  | -1.50019 | 5.00E-05 | 0.00170056 |
| NM_016010.2    | 51101       | FAM164A      | 3352  | 14.1508  | 28.8579  | -1.02809 | 5.00E-05 | 0.00170056 |
| NM_003613.3    | 8483        | CILP         | 4468  | 0.386228 | 1.67811  | -2.11931 | 5.00E-05 | 0.00170056 |
| NM_017617.3    | 4851        | NOTCH1       | 9295  | 8.52912  | 4.21805  | 1.01582  | 5.00E-05 | 0.00170056 |
| NM_004344.1    | 1069        | CETN2        | 1080  | 73.5583  | 198.216  | -1.43012 | 5.00E-05 | 0.00170056 |
| NM_173808.2    | 257194      | NEGR1        | 5669  | 2.27603  | 5.74145  | -1.33490 | 5.00E-05 | 0.00170056 |
| NM_004826.2    | 9427        | ECEL1        | 2859  | 1.96723  | 0.19955  | 3.30135  | 5.00E-05 | 0.00170056 |
| NM_001029996.3 | 200373      | PCDP1        | 2968  | 6.57611  | 20.5304  | -1.64245 | 5.00E-05 | 0.00170056 |

|                |             |          |       |          |          |          |          |            |
|----------------|-------------|----------|-------|----------|----------|----------|----------|------------|
| NM_003139.3    | 6734        | SRPR     | 3092  | 38.4817  | 20.0113  | 0.94336  | 5.00E-05 | 0.00170056 |
| NM_032704.3    | 84790       | TUBA1C   | 1553  | 38.9999  | 14.6569  | 1.41189  | 5.00E-05 | 0.00170056 |
| NM_001008226.1 | 283726      | FAM154B  | 3131  | 13.4542  | 48.7466  | -1.85724 | 5.00E-05 | 0.00170056 |
| NM_004599.2    | 6721        | SREBF2   | 4306  | 20.4238  | 9.9371   | 1.03935  | 5.00E-05 | 0.00170056 |
| NM_006072.4    | 10344       | CCL26    | 562   | 91.7771  | 3.7565   | 4.61067  | 5.00E-05 | 0.00170056 |
| NM_178452.4    | 123872      | DNAAF1   | 2436  | 12.3997  | 40.303   | -1.70058 | 5.00E-05 | 0.00170056 |
| NM_003277.3    | 7122        | CLDN5    | 1702  | 15.9801  | 4.58989  | 1.79975  | 5.00E-05 | 0.00170056 |
| NM_004744.3    | 9227        | LRAT     | 4888  | 0.144844 | 7.35898  | -5.66694 | 5.00E-05 | 0.00170056 |
| NM_182758.2    | 256764      | WDR72    | 7309  | 1.47999  | 5.5291   | -1.90146 | 5.00E-05 | 0.00170056 |
| NM_004061.3    | 1010        | CDH12    | 4345  | 0.634424 | 2.5427   | -2.00284 | 5.00E-05 | 0.00170056 |
| XM_001715090.3 | 144535      | C12orf55 | 5721  | 7.68912  | 29.9599  | -1.96214 | 5.00E-05 | 0.00170056 |
| NM_018690.2    | 55911       | APOBR    | 3733  | 5.62036  | 1.6302   | 1.78562  | 5.00E-05 | 0.00170056 |
| NM_000694.2    | 221         | ALDH3B1  | 2815  | 12.1305  | 37.5336  | -1.62955 | 5.00E-05 | 0.00170056 |
| TCONS_00156810 | XLOC_015004 | -        | 2828  | 1.59004  | 4.75247  | -1.57962 | 5.00E-05 | 0.00170056 |
| NM_001105556.1 | 9473        | C1orf38  | 2723  | 16.0843  | 4.60949  | 1.80297  | 5.00E-05 | 0.00170056 |
| NM_015101.2    | 23127       | GLT25D2  | 5182  | 1.03445  | 3.51641  | -1.76524 | 5.00E-05 | 0.00170056 |
| NM_018136.4    | 259266      | ASPM     | 10888 | 4.61777  | 1.98663  | 1.21687  | 5.00E-05 | 0.00170056 |
| XM_002343299.3 | 319089      | TTC6     | 2913  | 6.0073   | 14.5005  | -1.27132 | 5.00E-05 | 0.00170056 |
| NM_015714.3    | 50486       | G0S2     | 963   | 16.3631  | 3.30018  | 2.30983  | 5.00E-05 | 0.00170056 |
| NM_025059.3    | 80129       | C6orf97  | 5283  | 19.8813  | 49.2414  | -1.30846 | 5.00E-05 | 0.00170056 |
| NM_001428.3    | 2023        | ENO1     | 2187  | 172.998  | 74.8777  | 1.20815  | 5.00E-05 | 0.00170056 |
| NM_024726.3    | 79781       | IQCA1    | 3188  | 5.35544  | 12.6918  | -1.24482 | 5.00E-05 | 0.00170056 |
| NM_012072.3    | 22918       | CD93     | 6701  | 46.816   | 16.534   | 1.50157  | 5.00E-05 | 0.00170056 |
| NM_001145077.1 | 390205      | LRRC10B  | 2219  | 5.45324  | 15.9905  | -1.55203 | 5.00E-05 | 0.00170056 |
| NM_007050.5    | 11122       | PTPRT    | 12637 | 0.840909 | 3.06933  | -1.86790 | 5.00E-05 | 0.00170056 |
| NM_019050.2    | 54532       | USP53    | 6595  | 32.0426  | 91.3625  | -1.51161 | 5.00E-05 | 0.00170056 |
| NM_001964.2    | 1958        | EGR1     | 3136  | 73.3271  | 4.00823  | 4.19331  | 5.00E-05 | 0.00170056 |
| TCONS_00223119 | XLOC_019117 | -        | 1701  | 1.20423  | 6.32961  | -2.39401 | 5.00E-05 | 0.00170056 |
| NM_004233.3    | 9308        | CD83     | 2478  | 16.9528  | 3.93296  | 2.10783  | 5.00E-05 | 0.00170056 |
| NM_001321.1    | 1466        | CSRP2    | 901   | 68.4496  | 290.382  | -2.08484 | 5.00E-05 | 0.00170056 |
| NM_172239.4    | 254958      | REXO1L1  | 7032  | 3.62701  | 24.4886  | -2.75526 | 5.00E-05 | 0.00170056 |
| NM_001432.2    | 2069        | EREG     | 4628  | 6.58287  | 0.223087 | 4.88304  | 5.00E-05 | 0.00170056 |
| NM_020130.3    | 56892       | C8orf4   | 1833  | 124.593  | 15.0847  | 3.04607  | 5.00E-05 | 0.00170056 |
| NM_181426.1    | 339829      | CCDC39   | 3854  | 10.2866  | 30.2295  | -1.55519 | 5.00E-05 | 0.00170056 |
| NM_020802.2    | 57562       | KIAA1377 | 7043  | 6.8155   | 20.8934  | -1.61616 | 5.00E-05 | 0.00170056 |
| NM_032269.5    | 84229       | CCDC135  | 2911  | 2.35336  | 8.51123  | -1.85465 | 5.00E-05 | 0.00170056 |
| NM_000129.3    | 2162        | F13A1    | 3863  | 283.732  | 50.3977  | 2.49310  | 5.00E-05 | 0.00170056 |
| NM_002416.1    | 4283        | CXCL9    | 2545  | 2.33524  | 12.9622  | -2.47267 | 5.00E-05 | 0.00170056 |
| NM_002275.3    | 3866        | KRT15    | 1840  | 114.291  | 40.1227  | 1.51021  | 5.00E-05 | 0.00170056 |
| NM_145235.3    | 92565       | FANK1    | 1296  | 13.2293  | 31.9607  | -1.27257 | 5.00E-05 | 0.00170056 |
| TCONS_00047584 | XLOC_003947 | -        | 3909  | 3.15883  | 14.2751  | -2.17604 | 5.00E-05 | 0.00170056 |
| NM_001018071.3 | 143162      | FRMPD2   | 5024  | 2.91976  | 10.6401  | -1.86558 | 5.00E-05 | 0.00170056 |
| NM_001099294.1 | 85352       | KIAA1644 | 6741  | 0.722345 | 3.00503  | -2.05662 | 5.00E-05 | 0.00170056 |
| NM_032160.2    | 92126       | DSEL     | 9281  | 2.92292  | 6.57699  | -1.17001 | 5.00E-05 | 0.00170056 |
| NM_138451.1    | 115811      | IQCD     | 1350  | 4.24084  | 15.1969  | -1.84136 | 5.00E-05 | 0.00170056 |
| TCONS_00196639 | XLOC_017787 | -        | 3867  | 0.921229 | 5.21085  | -2.49989 | 5.00E-05 | 0.00170056 |
| NM_052947.3    | 115701      | ALPK2    | 7303  | 6.96329  | 0.905442 | 2.94308  | 5.00E-05 | 0.00170056 |
| NM_004681.2    | 9086        | EIF1AY   | 1390  | 24.3086  | 6.92326  | 1.81194  | 5.00E-05 | 0.00170056 |
| NM_198320.3    | 1368        | CPM      | 6655  | 8.65585  | 3.88827  | 1.15455  | 5.00E-05 | 0.00170056 |
| NM_001369.2    | 1767        | DNAH5    | 15573 | 14.6696  | 86.2259  | -2.55529 | 5.00E-05 | 0.00170056 |
| NM_024787.2    | 79845       | RNF122   | 1868  | 9.51535  | 2.84717  | 1.74073  | 5.00E-05 | 0.00170056 |
| NM_001017424.2 | 3776        | KCNK2    | 3597  | 0.464832 | 4.18624  | -3.17087 | 5.00E-05 | 0.00170056 |
| 3539           | 3539        | -        | 318   | 646.944  | 166.569  | 1.95752  | 5.00E-05 | 0.00170056 |
| 3538           | 3538        | -        | 320   | 2118.9   | 391.077  | 2.43779  | 5.00E-05 | 0.00170056 |



|                |             |          |       |          |          |          |          |            |
|----------------|-------------|----------|-------|----------|----------|----------|----------|------------|
| NM_004106.1    | 2207        | FCER1G   | 591   | 56.3504  | 20.4269  | 1.46396  | 5.00E-05 | 0.00170056 |
| NM_014432.2    | 53832       | IL20RA   | 3682  | 3.56984  | 8.83636  | -1.30759 | 5.00E-05 | 0.00170056 |
| NM_016232.4    | 9173        | IL1RL1   | 2058  | 21.8276  | 4.43645  | 2.29867  | 5.00E-05 | 0.00170056 |
| NM_194302.2    | 255101      | CCDC108  | 5945  | 1.19487  | 5.20581  | -2.12327 | 5.00E-05 | 0.00170056 |
| NM_004751.2    | 9245        | GCNT3    | 2222  | 8.69937  | 1.53688  | 2.50091  | 5.00E-05 | 0.00170056 |
| NM_197965.2    | 345274      | SLC10A6  | 1502  | 5.36734  | 0.869628 | 2.62574  | 5.00E-05 | 0.00170056 |
| NM_000442.4    | 5175        | PECAM1   | 4449  | 36.6826  | 13.0084  | 1.49566  | 5.00E-05 | 0.00170056 |
| NM_001102608.1 | 131873      | COL6A6   | 8470  | 6.18578  | 2.25225  | 1.45759  | 5.00E-05 | 0.00170056 |
| NM_014375.2    | 26998       | FETUB    | 1627  | 4.32611  | 0.179476 | 4.59121  | 5.00E-05 | 0.00170056 |
| NM_004418.3    | 1844        | DUSP2    | 1685  | 13.1242  | 2.1462   | 2.61238  | 5.00E-05 | 0.00170056 |
| NM_001039112.2 | 654463      | FER1L6   | 5890  | 16.5655  | 8.05787  | 1.03971  | 5.00E-05 | 0.00170056 |
| NM_002664.2    | 5341        | PLEK     | 2852  | 35.5301  | 12.9319  | 1.45811  | 5.00E-05 | 0.00170056 |
| NM_181643.4    | 128344      | C1orf88  | 2346  | 18.504   | 68.8523  | -1.89567 | 5.00E-05 | 0.00170056 |
| NM_002005.3    | 2242        | FES      | 2783  | 10.3519  | 3.7547   | 1.46312  | 5.00E-05 | 0.00170056 |
| NM_005559.3    | 284217      | LAMA1    | 9657  | 2.7555   | 1.10972  | 1.31212  | 5.00E-05 | 0.00170056 |
| NM_173081.3    | 219681      | ARMC3    | 2808  | 14.6867  | 56.0279  | -1.93164 | 5.00E-05 | 0.00170056 |
| NM_001769.3    | 928         | CD9      | 1314  | 232.588  | 115.582  | 1.00886  | 5.00E-05 | 0.00170056 |
| NM_002923.3    | 5997        | RGS2     | 1350  | 282.433  | 16.1875  | 4.12495  | 5.00E-05 | 0.00170056 |
| NM_000632.3    | 3684        | ITGAM    | 4742  | 23.0795  | 3.5118   | 2.71633  | 5.00E-05 | 0.00170056 |
| NM_152290.2    | 93190       | C1orf158 | 1019  | 3.24005  | 13.1781  | -2.02405 | 5.00E-05 | 0.00170056 |
| NM_213606.3    | 387700      | SLC16A12 | 4622  | 3.39611  | 19.0353  | -2.48672 | 5.00E-05 | 0.00170056 |
| NM_033050.4    | 56670       | SUCNR1   | 1650  | 12.2573  | 1.22793  | 3.31934  | 5.00E-05 | 0.00170056 |
| NM_024790.6    | 79848       | CSPP1    | 4718  | 13.9441  | 28.1323  | -1.01257 | 5.00E-05 | 0.00170056 |
| NM_006743.4    | 5935        | RBM3     | 4432  | 83.635   | 32.7683  | 1.35181  | 5.00E-05 | 0.00170056 |
| NM_198552.2    | 375061      | FAM89A   | 1498  | 9.85642  | 2.97647  | 1.72746  | 5.00E-05 | 0.00170056 |
| NM_198491.1    | 339145      | FAM92B   | 1897  | 7.07712  | 18.7218  | -1.40349 | 5.00E-05 | 0.00170056 |
| NM_206996.2    | 200162      | SPAG17   | 7125  | 7.84834  | 32.7739  | -2.06209 | 5.00E-05 | 0.00170056 |
| NM_175610.2    | 7082        | TJP1     | 6925  | 17.6747  | 54.4488  | -1.62321 | 5.00E-05 | 0.00170056 |
| NM_000399.3    | 1959        | EGR2     | 2979  | 11.0657  | 0.558829 | 4.30754  | 5.00E-05 | 0.00170056 |
| NM_001035.2    | 6262        | RYR2     | 16365 | 1.49442  | 3.63456  | -1.28220 | 5.00E-05 | 0.00170056 |
| NM_001372.3    | 1770        | DNAH9    | 13750 | 6.92764  | 24.7797  | -1.83872 | 5.00E-05 | 0.00170056 |
| TCONS_00111412 | XLOC_009731 | -        | 2716  | 0.808264 | 9.19673  | -3.50822 | 5.00E-05 | 0.00170056 |
| NM_130445.2    | 80781       | COL18A1  | 5391  | 22.0442  | 6.12056  | 1.84866  | 5.00E-05 | 0.00170056 |
| NM_001011657.3 | 84460       | ZMAT1    | 3489  | 8.54761  | 18.0936  | -1.08189 | 5.00E-05 | 0.00170056 |
| NM_001142966.1 | 80000       | GREB1L   | 6052  | 1.16724  | 5.39672  | -2.20898 | 5.00E-05 | 0.00170056 |
| NM_080860.2    | 89765       | RSPH1    | 1367  | 24.2134  | 91.1443  | -1.91235 | 5.00E-05 | 0.00170056 |
| TCONS_00311623 | XLOC_026432 | -        | 2466  | 3.2772   | 0.122291 | 4.74408  | 5.00E-05 | 0.00170056 |
| NM_153228.2    | 162282      | ANKFN1   | 2426  | 3.15844  | 10.9039  | -1.78755 | 5.00E-05 | 0.00170056 |
| NM_145244.3    | 115265      | DDIT4L   | 2634  | 3.93055  | 14.2051  | -1.85361 | 5.00E-05 | 0.00170056 |
| NM_003294.3    | 7177        | TPSAB1   | 1194  | 31.0668  | 7.79991  | 1.99384  | 5.00E-05 | 0.00170056 |
| NM_004683.4    | 9104        | RGN      | 1615  | 1.45765  | 9.81361  | -2.75114 | 5.00E-05 | 0.00170056 |
| NM_015429.3    | 25890       | ABI3BP   | 4473  | 7.94241  | 16.7159  | -1.07357 | 5.00E-05 | 0.00170056 |
| NM_174897.2    | 128859      | BPIL3    | 1362  | 12.3393  | 0        | inf      | 5.00E-05 | 0.00170056 |
| NM_032133.4    | 84073       | MYCBPAP  | 3190  | 1.12218  | 4.22123  | -1.91136 | 5.00E-05 | 0.00170056 |
| NM_005328.2    | 3037        | HAS2     | 3275  | 6.21144  | 1.47874  | 2.07056  | 5.00E-05 | 0.00170056 |
| NM_001100388.1 | 399949      | C11orf88 | 714   | 23.0691  | 119.6    | -2.37419 | 5.00E-05 | 0.00170056 |
| NM_177980.2    | 60437       | CDH26    | 3193  | 59.9684  | 4.95779  | 3.59643  | 5.00E-05 | 0.00170056 |
| NM_016230.3    | 51167       | CYB5R4   | 2247  | 26.2549  | 11.1377  | 1.23713  | 5.00E-05 | 0.00170056 |
| NM_152860.1    | 121340      | SP7      | 2974  | 0.15683  | 2.13551  | -3.76731 | 5.00E-05 | 0.00170056 |
| NM_145243.3    | 115209      | OMA1     | 1909  | 27.9154  | 54.4779  | -0.96461 | 5.00E-05 | 0.00170056 |
| NM_001004303.4 | 199920      | C1orf168 | 3460  | 2.06803  | 10.1833  | -2.29988 | 5.00E-05 | 0.00170056 |
| NM_022093.1    | 63923       | TNN      | 5008  | 0.688977 | 2.94223  | -2.09438 | 5.00E-05 | 0.00170056 |
| NM_006536.5    | 9635        | CLCA2    | 4025  | 9.59893  | 2.5704   | 1.90088  | 5.00E-05 | 0.00170056 |
| NM_031310.1    | 83483       | PLVAP    | 2276  | 34.2818  | 12.0634  | 1.50680  | 5.00E-05 | 0.00170056 |

|                |             |          |       |          |          |          |          |            |
|----------------|-------------|----------|-------|----------|----------|----------|----------|------------|
| NM_020546.2    | 108         | ADCY2    | 6553  | 2.7012   | 9.7531   | -1.85226 | 5.00E-05 | 0.00170056 |
| NM_138806.3    | 131450      | CD200R1  | 2272  | 18.6071  | 4.05556  | 2.19788  | 5.00E-05 | 0.00170056 |
| NM_004417.3    | 1843        | DUSP1    | 2024  | 356.027  | 27.4142  | 3.69899  | 5.00E-05 | 0.00170056 |
| NM_002578.3    | 5063        | PAK3     | 2754  | 1.69967  | 6.02646  | -1.82606 | 5.00E-05 | 0.00170056 |
| NM_001128148.1 | 7037        | TFRC     | 5083  | 39.0907  | 15.7885  | 1.30795  | 5.00E-05 | 0.00170056 |
| NM_014918.4    | 22856       | CHSY1    | 4550  | 32.3763  | 14.3278  | 1.17613  | 5.00E-05 | 0.00170056 |
| NM_007072.2    | 11148       | HHLA2    | 2660  | 2.21665  | 7.80557  | -1.81612 | 5.00E-05 | 0.00170056 |
| NM_006332.3    | 10437       | IFI30    | 1032  | 108.255  | 25.0932  | 2.10906  | 5.00E-05 | 0.00170056 |
| NM_024694.3    | 79747       | C6orf103 | 5290  | 4.22462  | 14.1751  | -1.74647 | 5.00E-05 | 0.00170056 |
| NM_002986.2    | 6356        | CCL11    | 925   | 26.4263  | 2.42561  | 3.44556  | 5.00E-05 | 0.00170056 |
| TCONS_00143182 | XLOC_012967 | -        | 403   | 4.05286  | 39.6362  | -3.28981 | 5.00E-05 | 0.00170056 |
| NM_006469.4    | 10625       | IVNS1ABP | 4199  | 125.692  | 49.9464  | 1.33144  | 5.00E-05 | 0.00170056 |
| NM_006288.3    | 7070        | THY1     | 2397  | 56.7715  | 27.7046  | 1.03504  | 5.00E-05 | 0.00170056 |
| NM_033143.2    | 2250        | FGF5     | 5285  | 2.41944  | 5.97552  | -1.30439 | 5.00E-05 | 0.00170056 |
| NM_001736.3    | 728         | C5AR1    | 2342  | 15.3561  | 3.21669  | 2.25516  | 5.00E-05 | 0.00170056 |
| NM_017709.3    | 54855       | FAM46C   | 5720  | 61.9506  | 27.8846  | 1.15165  | 5.00E-05 | 0.00170056 |
| NM_001062.3    | 6947        | TGN1     | 1567  | 227.086  | 24.9139  | 3.18821  | 5.00E-05 | 0.00170056 |
| NM_001003845.2 | 389058      | SP5      | 1947  | 0.499975 | 2.53688  | -2.34313 | 5.00E-05 | 0.00170056 |
| NM_004795.3    | 9365        | KL       | 5006  | 4.16757  | 1.61424  | 1.36835  | 5.00E-05 | 0.00170056 |
| NM_013377.3    | 29951       | PDZRN4   | 3243  | 0.229262 | 3.19894  | -3.80253 | 5.00E-05 | 0.00170056 |
| NM_004787.1    | 9353        | SLIT2    | 4950  | 9.02891  | 55.0618  | -2.60843 | 5.00E-05 | 0.00170056 |
| NM_172337.1    | 5015        | OTX2     | 2069  | 11.9891  | 2.2998   | 2.38214  | 5.00E-05 | 0.00170056 |
| NM_002162.3    | 3385        | ICAM3    | 1780  | 19.6828  | 7.05418  | 1.48038  | 5.00E-05 | 0.00170056 |
| NM_145010.2    | 219670      | ENKUR    | 3318  | 7.58547  | 29.2479  | -1.94702 | 5.00E-05 | 0.00170056 |
| NM_000250.1    | 4353        | MPO      | 3215  | 0.112594 | 0.94959  | -3.07618 | 5.00E-05 | 0.00170056 |
| TCONS_00095311 | XLOC_007699 | -        | 5854  | 0.553437 | 1.88318  | -1.76668 | 5.00E-05 | 0.00170056 |
| TCONS_00046409 | XLOC_004317 | -        | 8317  | 0.41225  | 1.6632   | -2.01237 | 5.00E-05 | 0.00170056 |
| NM_018226.4    | 57140       | RNPEPL1  | 3018  | 9.47805  | 4.1952   | 1.17585  | 5.00E-05 | 0.00170056 |
| NM_144702.2    | 149499      | LRRC71   | 1971  | 2.20457  | 6.77299  | -1.61929 | 5.00E-05 | 0.00170056 |
| NM_001140.3    | 246         | ALOX15   | 2684  | 641.058  | 133.916  | 2.25913  | 5.00E-05 | 0.00170056 |
| 3501           | 3501        | -        | 980   | 488.109  | 85.1202  | 2.51963  | 5.00E-05 | 0.00170056 |
| 3503           | 3503        | -        | 983   | 3703.86  | 21.8126  | 7.40772  | 5.00E-05 | 0.00170056 |
| 3505           | 3505        | -        | 1188  | 11.741   | 0.520062 | 4.49673  | 5.00E-05 | 0.00170056 |
| NM_001004431.1 | 284207      | METRNL   | 1333  | 27.9765  | 10.6392  | 1.39482  | 5.00E-05 | 0.00170056 |
| NM_001377.2    | 79659       | DYNC2H1  | 13678 | 22.3651  | 55.5998  | -1.31383 | 5.00E-05 | 0.00170056 |
| NM_006290.2    | 7128        | TNFAIP3  | 4432  | 54.1129  | 15.3184  | 1.82071  | 5.00E-05 | 0.00170056 |
| NM_001002796.2 | 79772       | MCTP1    | 3613  | 26.7032  | 14.0251  | 0.92901  | 5.00E-05 | 0.00170056 |
| NM_001173463.1 | 55605       | KIF21A   | 6530  | 23.7067  | 50.1285  | -1.08034 | 5.00E-05 | 0.00170056 |
| NM_000572.2    | 3586        | IL10     | 1629  | 8.45793  | 0.584201 | 3.85577  | 5.00E-05 | 0.00170056 |
| NM_000887.3    | 3687        | ITGAX    | 4649  | 9.69334  | 3.13523  | 1.62842  | 5.00E-05 | 0.00170056 |
| NM_001195037.2 | 345930      | ECT2L    | 4343  | 7.36833  | 31.9083  | -2.11452 | 5.00E-05 | 0.00170056 |
| NM_003856.2    | 9173        | IL1RL1   | 2508  | 34.9321  | 3.82156  | 3.19232  | 5.00E-05 | 0.00170056 |
| NM_173549.2    | 203111      | C8orf47  | 1550  | 8.76943  | 26.9158  | -1.61790 | 5.00E-05 | 0.00170056 |
| NM_007115.3    | 7130        | TNFAIP6  | 1424  | 10.3747  | 1.43809  | 2.85083  | 5.00E-05 | 0.00170056 |
| NM_002266.2    | 3838        | KPNA2    | 1980  | 20.5454  | 7.89084  | 1.38057  | 5.00E-05 | 0.00170056 |
| NM_018557.2    | 53353       | LRP1B    | 16531 | 6.23523  | 31.27    | -2.32627 | 5.00E-05 | 0.00170056 |
| NM_152447.3    | 145581      | LRFN5    | 3732  | 1.26236  | 5.45421  | -2.11124 | 5.00E-05 | 0.00170056 |
| NM_152632.3    | 170063      | CXorf22  | 3613  | 7.50052  | 28.8899  | -1.94550 | 5.00E-05 | 0.00170056 |
| NM_000584.3    | 3576        | IL8      | 1705  | 17.5023  | 4.72844  | 1.88811  | 5.00E-05 | 0.00170056 |
| NM_001025370.2 | 7422        | VEGFA    | 3407  | 13.3736  | 3.15868  | 2.08199  | 5.00E-05 | 0.00170056 |
| NM_000783.3    | 1592        | CYP26A1  | 2119  | 1.00104  | 6.28125  | -2.64956 | 5.00E-05 | 0.00170056 |
| NM_005415.4    | 6574        | SLC20A1  | 3379  | 35.341   | 17.1992  | 1.03900  | 5.00E-05 | 0.00170056 |
| NM_002001.2    | 2205        | FCER1A   | 1165  | 35.7487  | 8.02895  | 2.15461  | 5.00E-05 | 0.00170056 |
| NM_002575.2    | 5055        | SERPINB2 | 1908  | 17.0978  | 2.09067  | 3.03177  | 5.00E-05 | 0.00170056 |

|                |             |           |       |          |          |          |          |            |
|----------------|-------------|-----------|-------|----------|----------|----------|----------|------------|
| NM_002569.2    | 5045        | FURIN     | 4180  | 12.5931  | 5.6162   | 1.16497  | 5.00E-05 | 0.00170056 |
| TCONS_00053150 | XLOC_004440 | -         | 13299 | 2.35416  | 0.555141 | 2.08429  | 5.00E-05 | 0.00170056 |
| NM_005322.2    | 3009        | HIST1H1B  | 790   | 61.894   | 20.4327  | 1.59892  | 5.00E-05 | 0.00170056 |
| NM_198428.2    | 27241       | BBS9      | 4019  | 12.957   | 27.5062  | -1.08603 | 5.00E-05 | 0.00170056 |
| NM_003045.4    | 6541        | SLC7A1    | 7343  | 12.3015  | 5.38778  | 1.19107  | 5.00E-05 | 0.00170056 |
| NM_001098212.1 | 3269        | HRH1      | 4278  | 8.42974  | 2.1195   | 1.99176  | 5.00E-05 | 0.00170056 |
| NM_001195610.1 | 51473       | DCDC2     | 4615  | 2.15673  | 5.14216  | -1.25353 | 5.00E-05 | 0.00170056 |
| NM_130782.2    | 64407       | RGS18     | 2145  | 27.0136  | 8.23576  | 1.71371  | 5.00E-05 | 0.00170056 |
| NM_002631.2    | 5226        | PGD       | 1937  | 78.0959  | 26.4082  | 1.56426  | 5.00E-05 | 0.00170056 |
| NM_178329.2    | 1232        | CCR3      | 1717  | 11.2616  | 0.586317 | 4.26358  | 5.00E-05 | 0.00170056 |
| NM_001548.3    | 3434        | IFIT1     | 1861  | 20.1525  | 50.5275  | -1.32611 | 5.00E-05 | 0.00170056 |
| NM_198469.2    | 254956      | MORN5     | 705   | 13.9086  | 53.541   | -1.94466 | 5.00E-05 | 0.00170056 |
| NM_152723.1    | 220388      | CCDC89    | 2428  | 2.79367  | 8.37432  | -1.58381 | 5.00E-05 | 0.00170056 |
| NM_205545.1    | 137797      | LYPD2     | 534   | 29.9235  | 82.1161  | -1.45639 | 5.00E-05 | 0.00170056 |
| NM_014157.3    | 29070       | CCDC113   | 5272  | 7.57459  | 29.9856  | -1.98503 | 5.00E-05 | 0.00170056 |
| NM_006988.3    | 9510        | ADAMTS1   | 4651  | 107.144  | 11.7692  | 3.18646  | 5.00E-05 | 0.00170056 |
| NM_000681.3    | 150         | ADRA2A    | 3876  | 23.6584  | 8.47532  | 1.48102  | 5.00E-05 | 0.00170056 |
| NM_000494.3    | 1308        | COL17A1   | 5610  | 6.47481  | 1.50136  | 2.10857  | 5.00E-05 | 0.00170056 |
| NM_054114.3    | 117289      | TAGAP     | 3363  | 17.2271  | 7.31083  | 1.23657  | 5.00E-05 | 0.00170056 |
| NM_003745.1    | 8651        | SOCS1     | 1216  | 8.32931  | 2.14757  | 1.95549  | 5.00E-05 | 0.00170056 |
| NM_002725.3    | 5549        | PRELP     | 5820  | 0.70576  | 4.20122  | -2.57356 | 5.00E-05 | 0.00170056 |
| NM_207517.2    | 57188       | ADAMTSL3  | 7336  | 1.00455  | 5.16367  | -2.36184 | 5.00E-05 | 0.00170056 |
| NM_001927.3    | 1674        | DES       | 2248  | 0.408419 | 11.2504  | -4.78378 | 5.00E-05 | 0.00170056 |
| TCONS_00114410 | XLOC_009730 | -         | 4688  | 3.40649  | 32.4166  | -3.25038 | 5.00E-05 | 0.00170056 |
| TCONS_00233526 | XLOC_020559 | -         | 4976  | 2.17561  | 14.7785  | -2.76401 | 5.00E-05 | 0.00170056 |
| NM_005024.1    | 5273        | SERPINB10 | 1194  | 14.3433  | 3.85368  | 1.89607  | 5.00E-05 | 0.00170056 |
| NM_015914.5    | 51061       | TXNDC11   | 3047  | 32.1322  | 13.9276  | 1.20607  | 5.00E-05 | 0.00170056 |
| NM_173528.2    | 161502      | C15orf26  | 1575  | 4.11994  | 10.3361  | -1.32700 | 5.00E-05 | 0.00170056 |
| NM_030955.2    | 81792       | ADAMTS12  | 4955  | 7.86652  | 3.08893  | 1.34862  | 5.00E-05 | 0.00170056 |
| NM_014442.2    | 27181       | SIGLEC8   | 2949  | 6.0318   | 0.828849 | 2.86341  | 5.00E-05 | 0.00170056 |
| NM_000625.4    | 4843        | NOS2      | 4206  | 138.964  | 32.9436  | 2.07664  | 5.00E-05 | 0.00170056 |
| NM_005613.5    | 5999        | RGS4      | 3371  | 43.9162  | 3.37979  | 3.69975  | 5.00E-05 | 0.00170056 |
| NM_173833.5    | 286133      | SCARA5    | 4151  | 3.36922  | 11.485   | -1.76926 | 5.00E-05 | 0.00170056 |
| NM_004036.3    | 109         | ADCY3     | 4397  | 41.1765  | 10.7229  | 1.94113  | 5.00E-05 | 0.00170056 |
| NM_005420.2    | 6783        | SULT1E1   | 1780  | 5.87511  | 20.0132  | -1.76827 | 5.00E-05 | 0.00170056 |
| NM_003617.3    | 8490        | RGS5      | 5927  | 127.864  | 27.46    | 2.21921  | 5.00E-05 | 0.00170056 |
| NM_152643.6    | 85442       | KNDC1     | 6773  | 0.615115 | 2.22139  | -1.85253 | 5.00E-05 | 0.00170056 |
| NM_004310.3    | 399         | RHOH      | 1999  | 13.7441  | 5.03523  | 1.44868  | 5.00E-05 | 0.00170056 |
| NM_006186.3    | 4929        | NR4A2     | 3531  | 36.2997  | 2.52602  | 3.84502  | 5.00E-05 | 0.00170056 |
| NM_018100.3    | 114327      | EFHC1     | 5582  | 13.809   | 31.5883  | -1.19378 | 5.00E-05 | 0.00170056 |
| NM_004877.2    | 9535        | GMFG      | 657   | 54.6316  | 20.698   | 1.40025  | 5.00E-05 | 0.00170056 |
| NM_002291.2    | 3912        | LAMB1     | 5846  | 80.7467  | 35.4162  | 1.18899  | 5.00E-05 | 0.00170056 |
| NM_005337.4    | 3071        | NCKAP1L   | 3893  | 32.9666  | 15.6878  | 1.07136  | 5.00E-05 | 0.00170056 |
| NM_015896.2    | 51364       | ZMYND10   | 1773  | 12.5612  | 40.1134  | -1.67510 | 5.00E-05 | 0.00170056 |
| NM_002934.2    | 6036        | RNASE2    | 735   | 13.7152  | 1.89386  | 2.85638  | 5.00E-05 | 0.00170056 |
| NM_018602.3    | 55466       | DNAJA4    | 3186  | 6.74825  | 27.6561  | -2.03501 | 5.00E-05 | 0.00170056 |
| NM_004283.3    | 9545        | RAB3D     | 4273  | 17.0659  | 7.80532  | 1.12859  | 5.00E-05 | 0.00170056 |
| XM_003118518.1 | 728763      | LOC728763 | 4773  | 0.625649 | 2.42598  | -1.95514 | 5.00E-05 | 0.00170056 |
| NM_025208.4    | 80310       | PDGFD     | 3993  | 17.927   | 50.6722  | -1.49906 | 5.00E-05 | 0.00170056 |
| NM_003245.3    | 7053        | TGM3      | 2677  | 0.373215 | 2.08807  | -2.48409 | 5.00E-05 | 0.00170056 |
| NM_003551.2    | 8382        | NME5      | 1226  | 15.7707  | 41.1749  | -1.38452 | 5.00E-05 | 0.00170056 |
| NM_004522.1    | 3800        | KIF5C     | 6933  | 4.06583  | 0.995353 | 2.03027  | 5.00E-05 | 0.00170056 |
| NM_005099.4    | 9507        | ADAMTS4   | 4332  | 7.26144  | 0.769313 | 3.23861  | 5.00E-05 | 0.00170056 |
| NM_052929.1    | 114827      | FHAD1     | 5090  | 7.22349  | 21.7711  | -1.59164 | 5.00E-05 | 0.00170056 |

|                |             |              |       |          |          |          |          |            |
|----------------|-------------|--------------|-------|----------|----------|----------|----------|------------|
| NM_139164.1    | 134429      | STARD4       | 2264  | 36.0735  | 9.85789  | 1.87159  | 5.00E-05 | 0.00170056 |
| NM_002010.2    | 2254        | FGF9         | 4530  | 0.735149 | 3.95586  | -2.42788 | 5.00E-05 | 0.00170056 |
| NM_003037.2    | 6504        | SLAMF1       | 2001  | 8.36112  | 3.22793  | 1.37309  | 5.00E-05 | 0.00170056 |
| NM_001099434.1 | 149069      | DCDC2B       | 1349  | 3.97787  | 11.7438  | -1.56183 | 5.00E-05 | 0.00170056 |
| NM_032372.4    | 84332       | DYDC2        | 1842  | 3.08081  | 15.5502  | -2.33555 | 5.00E-05 | 0.00170056 |
| TCONS_00283549 | XLOC_023644 | -            | 4674  | 1.00249  | 4.41261  | -2.13805 | 5.00E-05 | 0.00170056 |
| NM_021732.2    | 60370       | AVPI1        | 1392  | 16.5954  | 5.65012  | 1.55443  | 5.00E-05 | 0.00170056 |
| NM_005233.5    | 2042        | EPHA3        | 5809  | 0.591364 | 6.61111  | -3.48277 | 5.00E-05 | 0.00170056 |
| TCONS_00002363 | XLOC_001856 | -            | 3621  | 0.222229 | 1.21471  | -2.45050 | 5.00E-05 | 0.00170056 |
| NM_002309.3    | 3976        | LIF          | 3919  | 10.3753  | 1.67161  | 2.63384  | 5.00E-05 | 0.00170056 |
| NM_003890.2    | 8857        | FCGBP        | 16390 | 5.4615   | 0.968251 | 2.49584  | 5.00E-05 | 0.00170056 |
| NM_001170700.1 | 401124      | DTHD1        | 4336  | 11.1902  | 42.8185  | -1.93600 | 5.00E-05 | 0.00170056 |
| NM_000450.2    | 6401        | SELE         | 3875  | 15.0178  | 1.0889   | 3.78573  | 5.00E-05 | 0.00170056 |
| NM_000616.4    | 920         | CD4          | 3116  | 19.5486  | 7.53192  | 1.37598  | 5.00E-05 | 0.00170056 |
| NM_080826.1    | 140862      | ISM1         | 2592  | 0.361083 | 3.53493  | -3.29128 | 5.00E-05 | 0.00170056 |
| NM_014675.3    | 9696        | CROCC        | 6656  | 4.96803  | 11.6895  | -1.23446 | 5.00E-05 | 0.00170056 |
| NM_015529.2    | 26002       | MOXD1        | 3039  | 5.96796  | 15.3568  | -1.36357 | 5.00E-05 | 0.00170056 |
| TCONS_00048685 | XLOC_003947 | -            | 3649  | 0.750647 | 3.90145  | -2.37780 | 5.00E-05 | 0.00170056 |
| NM_012472.3    | 23639       | LRRC6        | 1582  | 7.53666  | 29.596   | -1.97341 | 5.00E-05 | 0.00170056 |
| NM_001901.2    | 1490        | CTGF         | 2344  | 245.499  | 73.5072  | 1.73976  | 5.00E-05 | 0.00170056 |
| NM_018837.3    | 55959       | SULF2        | 3899  | 32.3896  | 16.244   | 0.99562  | 5.00E-05 | 0.00170056 |
| NM_198505.2    | 344905      | ATP13A5      | 3657  | 7.9423   | 0.202547 | 5.29323  | 5.00E-05 | 0.00170056 |
| NM_000397.3    | 1536        | CYBB         | 4318  | 72.5272  | 32.2032  | 1.17132  | 5.00E-05 | 0.00170056 |
| NM_001008539.3 | 6542        | SLC7A2       | 7571  | 20.0817  | 81.1648  | -2.01497 | 5.00E-05 | 0.00170056 |
| NM_001300.5    | 1316        | KLF6         | 4662  | 51.0315  | 21.3798  | 1.25514  | 5.00E-05 | 0.00170056 |
| NM_207310.1    | 91409       | CCDC74B      | 1471  | 1.97281  | 7.4269   | -1.91251 | 5.00E-05 | 0.00170056 |
| TCONS_00196351 | XLOC_017552 | -            | 2737  | 0.241362 | 1.508    | -2.64337 | 5.00E-05 | 0.00170056 |
| NM_001010978.2 | 388633      | LDLRAD1      | 785   | 4.76103  | 21.8932  | -2.20114 | 5.00E-05 | 0.00170056 |
| NM_002629.2    | 5223        | PGAM1        | 1720  | 76.1938  | 37.1557  | 1.03609  | 5.00E-05 | 0.00170056 |
| NM_001136023.1 | 4778        | NFE2         | 1648  | 3.5887   | 0.790395 | 2.18282  | 5.00E-05 | 0.00170056 |
| XM_003118626.2 | 100506209   | LOC100506209 | 3519  | 1.21469  | 4.65572  | -1.93842 | 5.00E-05 | 0.00170056 |
| NM_199289.1    | 341676      | NEK5         | 2912  | 5.07284  | 22.3474  | -2.13924 | 5.00E-05 | 0.00170056 |
| NM_002982.3    | 6347        | CCL2         | 749   | 116.617  | 27.8862  | 2.06415  | 5.00E-05 | 0.00170056 |
| NM_203418.1    | 1827        | RCAN1        | 2408  | 52.0108  | 8.46773  | 2.61876  | 5.00E-05 | 0.00170056 |
| NM_016132.3    | 50804       | MYEF2        | 5403  | 3.15685  | 7.26697  | -1.20287 | 5.00E-05 | 0.00170056 |
| NM_080607.2    | 128434      | VSTM2L       | 1966  | 2.37048  | 9.42846  | -1.99184 | 5.00E-05 | 0.00170056 |
| NM_004319.1    | 460         | ASTN1        | 7314  | 1.72593  | 4.67112  | -1.43639 | 5.00E-05 | 0.00170056 |
| NM_182519.2    | 149954      | C20orf186    | 2174  | 215.456  | 0.410857 | 9.03454  | 5.00E-05 | 0.00170056 |
| NM_153355.3    | 154215      | NKAIN2       | 3114  | 0.313373 | 1.86897  | -2.57629 | 5.00E-05 | 0.00170056 |
| NM_033049.3    | 56667       | MUC13        | 2876  | 0.770846 | 4.95522  | -2.68443 | 5.00E-05 | 0.00170056 |
| NM_014518.2    | 7772        | ZNF229       | 4964  | 0.80532  | 2.9793   | -1.88734 | 5.00E-05 | 0.00170056 |
| TCONS_00156537 | XLOC_014786 | -            | 2200  | 1.41952  | 10.4718  | -2.88303 | 5.00E-05 | 0.00170056 |
| NM_004419.3    | 1847        | DUSP5        | 2528  | 51.4685  | 3.02362  | 4.08934  | 5.00E-05 | 0.00170056 |
| NM_012198.3    | 25801       | GCA          | 3226  | 17.687   | 6.82261  | 1.37430  | 5.00E-05 | 0.00170056 |
| NM_000774.3    | 1572        | CYP2F1       | 1826  | 2.28882  | 10.1934  | -2.15496 | 5.00E-05 | 0.00170056 |
| NM_001037763.2 | 340267      | COL28A1      | 3515  | 2.24992  | 7.67993  | -1.77122 | 5.00E-05 | 0.00170056 |
| NM_001692.3    | 525         | ATP6V1B1     | 1939  | 1.13725  | 6.22053  | -2.45149 | 5.00E-05 | 0.00170056 |
| NM_144687.2    | 91662       | NLRP12       | 3871  | 2.62713  | 0.432728 | 2.60196  | 5.00E-05 | 0.00170056 |
| NM_005467.3    | 10003       | NAALAD2      | 3196  | 3.64783  | 9.39162  | -1.36434 | 5.00E-05 | 0.00170056 |
| NM_002855.4    | 5818        | PVRL1        | 5481  | 6.69305  | 2.89439  | 1.20940  | 5.00E-05 | 0.00170056 |
| NM_005746.2    | 10135       | NAMPT        | 4582  | 109.804  | 33.1088  | 1.72964  | 5.00E-05 | 0.00170056 |
| NM_001855.3    | 1306        | COL15A1      | 5273  | 116.82   | 47.651   | 1.29371  | 5.00E-05 | 0.00170056 |
| TCONS_00202813 | XLOC_018025 | -            | 11391 | 0.632903 | 2.21341  | -1.80622 | 5.00E-05 | 0.00170056 |
| NM_004573.2    | 5330        | PLCB2        | 4677  | 17.4669  | 5.9517   | 1.55325  | 5.00E-05 | 0.00170056 |

|                |             |          |       |           |          |          |          |            |
|----------------|-------------|----------|-------|-----------|----------|----------|----------|------------|
| TCONS_00130407 | XLOC_011249 | -        | 5924  | 3.79528   | 0.945837 | 2.00454  | 5.00E-05 | 0.00170056 |
| NM_207303.2    | 26033       | ATRNL1   | 8732  | 3.52654   | 8.98249  | -1.34886 | 5.00E-05 | 0.00170056 |
| NM_002658.3    | 5328        | PLAU     | 2378  | 9.93527   | 2.54705  | 1.96373  | 5.00E-05 | 0.00170056 |
| TCONS_00220788 | XLOC_018529 | -        | 12307 | 1.29822   | 9.25856  | -2.83425 | 5.00E-05 | 0.00170056 |
| NM_003463.3    | 7803        | PTP4A1   | 5082  | 42.6519   | 18.4763  | 1.20693  | 5.00E-05 | 0.00170056 |
| NM_020398.3    | 57119       | SPINLW1  | 1989  | 2.12928   | 9.24972  | -2.11904 | 5.00E-05 | 0.00170056 |
| NM_001046.2    | 6558        | SLC12A2  | 6860  | 58.2409   | 26.3532  | 1.14405  | 5.00E-05 | 0.00170056 |
| NM_080876.3    | 142679      | DUSP19   | 5379  | 3.34223   | 7.97699  | -1.25503 | 5.00E-05 | 0.00170056 |
| NM_006931.2    | 6515        | SLC2A3   | 3938  | 64.4682   | 6.6203   | 3.28362  | 5.00E-05 | 0.00170056 |
| NM_024164.5    | 64499       | TPSB2    | 1166  | 15.8194   | 5.04708  | 1.64818  | 5.00E-05 | 0.00170056 |
| NM_152377.2    | 127795      | C1orf87  | 2028  | 5.88121   | 29.0239  | -2.30306 | 5.00E-05 | 0.00170056 |
| NM_183376.2    | 91947       | ARRDC4   | 4067  | 27.9758   | 13.9718  | 1.00166  | 5.00E-05 | 0.00170056 |
| NM_021572.4    | 59084       | ENPP5    | 2943  | 18.8783   | 46.0303  | -1.28585 | 5.00E-05 | 0.00170056 |
| NM_001198.3    | 639         | PRDM1    | 5165  | 32.3901   | 7.43687  | 2.12278  | 5.00E-05 | 0.00170056 |
| NM_145027.4    | 221458      | KIF6     | 3972  | 1.55591   | 6.42114  | -2.04507 | 5.00E-05 | 0.00170056 |
| NM_032291.2    | 84251       | SGIP1    | 4694  | 6.60444   | 1.11917  | 2.56101  | 5.00E-05 | 0.00170056 |
| NM_016240.2    | 51435       | SCARA3   | 3631  | 8.19438   | 19.6595  | -1.26252 | 5.00E-05 | 0.00170056 |
| NM_153837.1    | 221188      | GPR114   | 3761  | 3.09949   | 1.00844  | 1.61991  | 5.00E-05 | 0.00170056 |
| NM_001370.1    | 1768        | DNAH6    | 12795 | 8.36713   | 26.4719  | -1.66166 | 5.00E-05 | 0.00170056 |
| NM_001142699.1 | 1740        | DLG2     | 8046  | 0.732339  | 2.50481  | -1.77412 | 0.0001   | 0.00312189 |
| NM_032855.2    | 84941       | HSH2D    | 2367  | 9.8204    | 4.01723  | 1.28958  | 0.0001   | 0.00312189 |
| NM_198492.3    | 339390      | CLEC4G   | 1360  | 7.34315   | 0.188927 | 5.28050  | 0.0001   | 0.00312189 |
| NM_138983.2    | 116448      | OLIG1    | 2279  | 1.56839   | 0.277315 | 2.49969  | 0.0001   | 0.00312189 |
| NM_014600.2    | 30845       | EHD3     | 3906  | 9.27172   | 4.4657   | 1.05395  | 0.0001   | 0.00312189 |
| NM_022454.3    | 64321       | SOX17    | 2350  | 6.34451   | 1.98995  | 1.67277  | 0.0001   | 0.00312189 |
| NM_001128178.1 | 4867        | NPHP1    | 2583  | 6.04621   | 18.0636  | -1.57898 | 0.0001   | 0.00312189 |
| NM_021982.1    | 10802       | SEC24A   | 6387  | 24.0523   | 12.7041  | 0.92088  | 0.0001   | 0.00312189 |
| NM_015892.3    | 51363       | CHST15   | 4772  | 33.6386   | 16.3352  | 1.04213  | 0.0001   | 0.00312189 |
| NM_207365.3    | 344752      | AADACL2  | 1500  | 2.46449   | 7.16366  | -1.53941 | 0.0001   | 0.00312189 |
| NM_020726.4    | 57486       | NLN      | 8661  | 5.07155   | 2.57144  | 0.97985  | 0.0001   | 0.00312189 |
| NM_005308.2    | 2869        | GRK5     | 2558  | 20.7655   | 9.83868  | 1.07765  | 0.0001   | 0.00312189 |
| NM_012450.2    | 26266       | SLC13A4  | 2896  | 0.323442  | 1.41974  | -2.13405 | 0.0001   | 0.00312189 |
| NM_001747.2    | 822         | CAPG     | 1442  | 36.599    | 17.5555  | 1.05988  | 0.0001   | 0.00312189 |
| NM_001010860.1 | 161394      | SAMD15   | 2025  | 5.89604   | 15.4027  | -1.38536 | 0.0001   | 0.00312189 |
| NM_003290.2    | 7171        | TPM4     | 2645  | 185.917   | 74.5558  | 1.31827  | 0.0001   | 0.00312189 |
| NM_002466.2    | 4605        | MYBL2    | 2713  | 1.71879   | 0.356106 | 2.27101  | 0.0001   | 0.00312189 |
| NM_152891.2    | 260429      | PRSS33   | 1694  | 3.18508   | 0.199729 | 3.99521  | 0.0001   | 0.00312189 |
| NM_016184.3    | 50856       | CLEC4A   | 1281  | 11.5149   | 3.838    | 1.58508  | 0.0001   | 0.00312189 |
| NM_014452.3    | 27242       | TNFRSF21 | 3634  | 23.9361   | 12.6753  | 0.91717  | 0.0001   | 0.00312189 |
| NM_003775.3    | 8698        | S1PR4    | 1595  | 5.05165   | 1.56026  | 1.69497  | 0.0001   | 0.00312189 |
| NM_052913.2    | 114801      | TMEM200A | 5023  | 12.771    | 6.14934  | 1.05437  | 0.0001   | 0.00312189 |
| NM_152403.3    | 133584      | EGFLAM   | 4870  | 3.71132   | 0.305354 | 3.60338  | 0.0001   | 0.00312189 |
| NM_005178.4    | 602         | BCL3     | 1864  | 3.99111   | 1.01686  | 1.97267  | 0.0001   | 0.00312189 |
| NM_021202.1    | 58476       | TP53INP2 | 4124  | 8.59809   | 4.14375  | 1.05308  | 0.0001   | 0.00312189 |
| NM_006762.2    | 7805        | LAPTM5   | 2240  | 98.3309   | 45.4328  | 1.11391  | 0.0001   | 0.00312189 |
| TCONS_00256553 | XLOC_022163 | -        | 3585  | 0.809599  | 2.5145   | -1.63500 | 0.0001   | 0.00312189 |
| NM_144668.4    | 144406      | WDR66    | 3755  | 8.86727   | 25.3145  | -1.51340 | 0.0001   | 0.00312189 |
| NM_022159.3    | 64123       | ELTD1    | 3619  | 41.0828   | 20.0317  | 1.03625  | 0.0001   | 0.00312189 |
| NM_001130058.1 | 204962      | SLC44A5  | 3894  | 0.0925231 | 1.35922  | -3.87682 | 0.0001   | 0.00312189 |
| NM_001101.3    | 60          | ACTB     | 1812  | 546.491   | 247.482  | 1.14288  | 0.0001   | 0.00312189 |
| NM_000235.2    | 3988        | LIPA     | 2624  | 114.142   | 56.9854  | 1.00217  | 0.0001   | 0.00312189 |
| NM_006207.2    | 5157        | PDGFRL   | 1905  | 5.0509    | 12.6782  | -1.32774 | 0.0001   | 0.00312189 |
| NM_001987.4    | 2120        | ETV6     | 5989  | 28.8239   | 14.5064  | 0.99058  | 0.0001   | 0.00312189 |
| NM_001145033.1 | 387763      | C11orf96 | 1328  | 9.44974   | 2.90322  | 1.70262  | 0.0001   | 0.00312189 |

|                |             |           |       |          |          |          |         |            |
|----------------|-------------|-----------|-------|----------|----------|----------|---------|------------|
| NM_005188.2    | 867         | CBL       | 11227 | 12.0489  | 5.94293  | 1.01965  | 0.0001  | 0.00312189 |
| NM_005080.3    | 7494        | XBP1      | 1820  | 443.071  | 168.768  | 1.39249  | 0.0001  | 0.00312189 |
| NM_004267.3    | 9435        | CHST2     | 3043  | 5.30288  | 1.83738  | 1.52913  | 0.0001  | 0.00312189 |
| NM_005763.3    | 10157       | AASS      | 5871  | 21.2372  | 40.6068  | -0.93513 | 0.0001  | 0.00312189 |
| NM_004490.2    | 2888        | GRB14     | 2387  | 2.43755  | 0.594225 | 2.03635  | 0.0001  | 0.00312189 |
| NM_006217.3    | 5276        | SERPINI2  | 1430  | 6.15067  | 15.8819  | -1.36857 | 0.0001  | 0.00312189 |
| NM_006820.2    | 10964       | IFI44L    | 5874  | 13.0691  | 26.0828  | -0.99694 | 0.0001  | 0.00312189 |
| NM_017899.3    | 54997       | TESC      | 1019  | 6.08521  | 1.55267  | 1.97056  | 0.0001  | 0.00312189 |
| NM_012128.3    | 22802       | CLCA4     | 3213  | 3.14861  | 0.856218 | 1.87867  | 0.0001  | 0.00312189 |
| NM_021965.3    | 5239        | PGM5      | 3338  | 5.3593   | 11.5312  | -1.10542 | 0.0001  | 0.00312189 |
| NM_004666.2    | 8876        | VNN1      | 3844  | 1.11416  | 3.34588  | -1.58642 | 0.0001  | 0.00312189 |
| NM_001136536.3 | 401124      | DTHD1     | 4174  | 6.53736  | 23.4793  | -1.84461 | 0.0001  | 0.00312189 |
| NM_152222.1    | 84957       | RELT      | 3441  | 4.11863  | 1.36706  | 1.59109  | 0.0001  | 0.00312189 |
| NM_012335.3    | 4542        | MYO1F     | 4173  | 11.8334  | 5.46903  | 1.11351  | 0.0001  | 0.00312189 |
| NM_014214.2    | 3613        | IMPA2     | 1537  | 12.6433  | 5.21072  | 1.27881  | 0.0001  | 0.00312189 |
| NM_144696.4    | 126859      | AXDND1    | 3642  | 0.373224 | 1.53681  | -2.04183 | 0.0001  | 0.00312189 |
| NM_003637.3    | 8515        | ITGA10    | 5170  | 1.76991  | 4.08453  | -1.20649 | 0.0001  | 0.00312189 |
| NM_032960.2    | 9261        | MAPKAPK2  | 3052  | 27.0919  | 13.431   | 1.01230  | 0.0001  | 0.00312189 |
| NM_144607.4    | 124637      | CYB5D1    | 3746  | 10.7276  | 22.1838  | -1.04817 | 0.0001  | 0.00312189 |
| NM_001171.5    | 368         | ABCC6     | 5117  | 0.391075 | 1.5347   | -1.97244 | 0.0001  | 0.00312189 |
| NM_173050.3    | 80274       | SCUBE1    | 3868  | 0.409544 | 1.63163  | -1.99422 | 0.0001  | 0.00312189 |
| NM_025057.2    | 80127       | C14orf45  | 3106  | 10.2278  | 27.3281  | -1.41789 | 0.0001  | 0.00312189 |
| NM_019609.4    | 56265       | CPXM1     | 2400  | 30.893   | 62.6989  | -1.02116 | 0.0001  | 0.00312189 |
| TCONS_00294386 | XLOC_025176 | -         | 2795  | 0.581082 | 2.97643  | -2.35677 | 0.0001  | 0.00312189 |
| NM_023037.2    | 10129       | FRY       | 10717 | 16.9511  | 9.04581  | 0.90605  | 0.0001  | 0.00312189 |
| TCONS_00234687 | XLOC_020386 | -         | 870   | 0.984942 | 5.5224   | -2.48719 | 0.0001  | 0.00312189 |
| NM_019594.3    | 56262       | LRRC8A    | 4355  | 11.6663  | 5.56225  | 1.06861  | 0.0001  | 0.00312189 |
| NM_000859.2    | 3156        | HMGCR     | 4582  | 27.5603  | 13.8039  | 0.99752  | 0.0001  | 0.00312189 |
| NM_003798.2    | 8727        | CTNNAL1   | 2445  | 72.7985  | 37.1197  | 0.97173  | 0.0001  | 0.00312189 |
| NM_007035.3    | 11081       | KERA      | 2533  | 0.236443 | 1.56337  | -2.72510 | 0.0001  | 0.00312189 |
| NM_005472.4    | 10008       | KCNE3     | 3070  | 32.6935  | 15.9687  | 1.03376  | 0.0001  | 0.00312189 |
| NM_005717.2    | 10092       | ARPC5     | 1982  | 103.652  | 51.6959  | 1.00362  | 0.0001  | 0.00312189 |
| NM_080596.1    | 85235       | HIST1H2AH | 439   | 40.0337  | 13.0957  | 1.61213  | 0.0001  | 0.00312189 |
| NM_001004306.1 | 339184      | CCDC144NL | 2806  | 0.156135 | 1.40141  | -3.16602 | 0.0001  | 0.00312189 |
| NM_001099692.1 | 143244      | EIF5AL1   | 3840  | 0.132443 | 0.792116 | -2.58034 | 0.0001  | 0.00312189 |
| NM_173054.2    | 5649        | RELN      | 11565 | 0.71523  | 2.0522   | -1.52069 | 0.0001  | 0.00312189 |
| NM_001145710.1 | 375190      | LOC375190 | 1357  | 17.9748  | 35.5513  | -0.98392 | 0.0001  | 0.00312189 |
| TCONS_00049984 | XLOC_004304 | -         | 3774  | 2.87027  | 0.991739 | 1.53315  | 0.0001  | 0.00312189 |
| NM_001004354.2 | 441478      | NRARP     | 2621  | 7.36206  | 2.88738  | 1.35035  | 0.0001  | 0.00312189 |
| NM_001145029.1 | 374860      | ANKRD30B  | 4617  | 1.54551  | 0.436948 | 1.82255  | 0.0001  | 0.00312189 |
| NM_004093.3    | 1948        | EFNB2     | 4387  | 11.0504  | 5.4565   | 1.01805  | 0.00015 | 0.00437065 |
| NM_003930.3    | 8935        | SKAP2     | 3971  | 13.6123  | 6.95233  | 0.96935  | 0.00015 | 0.00437065 |
| NM_001083537.1 | 85002       | FAM86B1   | 2438  | 1.01585  | 3.30979  | -1.70405 | 0.00015 | 0.00437065 |
| NM_014791.2    | 9833        | MELK      | 2439  | 3.48268  | 0.952747 | 1.87003  | 0.00015 | 0.00437065 |
| NM_033423.3    | 2999        | GZMH      | 902   | 3.91429  | 11.1628  | -1.51188 | 0.00015 | 0.00437065 |
| NM_001098519.1 | 254050      | LRRC43    | 2025  | 1.89852  | 5.70931  | -1.58844 | 0.00015 | 0.00437065 |
| NM_016185.2    | 51155       | HN1       | 1602  | 21.6678  | 9.76826  | 1.14938  | 0.00015 | 0.00437065 |
| NM_001040147.1 | 8710        | SERPINB7  | 1973  | 1.82443  | 7.3731   | -2.01483 | 0.00015 | 0.00437065 |
| NM_002009.3    | 2252        | FGF7      | 3936  | 71.2442  | 32.1     | 1.15020  | 0.00015 | 0.00437065 |
| NM_024886.1    | 79946       | C10orf95  | 1469  | 2.28051  | 7.86922  | -1.78686 | 0.00015 | 0.00437065 |
| NM_178815.3    | 221079      | ARL5B     | 3589  | 29.5572  | 15.0757  | 0.97129  | 0.00015 | 0.00437065 |
| NM_012413.3    | 25797       | QPCT      | 1703  | 10.6364  | 4.26102  | 1.31974  | 0.00015 | 0.00437065 |
| NM_020844.2    | 57604       | KIAA1456  | 9590  | 2.82762  | 8.11618  | -1.52121 | 0.00015 | 0.00437065 |
| NM_144648.1    | 136332      | LRGUK     | 2700  | 4.61097  | 10.4557  | -1.18115 | 0.00015 | 0.00437065 |

|                   |                   |               |       |          |          |          |         |            |
|-------------------|-------------------|---------------|-------|----------|----------|----------|---------|------------|
| ENST00000528986.1 | ENSG00000255248.2 | RP11-166D19.1 | 3287  | 22.0809  | 41.2004  | -0.89986 | 0.00015 | 0.00437065 |
| NM_018430.2       | 55815             | TSNAXIP1      | 2446  | 2.50327  | 6.71949  | -1.42454 | 0.00015 | 0.00437065 |
| NM_152550.3       | 153769            | SH3RF2        | 3043  | 5.96655  | 2.31054  | 1.36867  | 0.00015 | 0.00437065 |
| NM_001946.2       | 1848              | DUSP6         | 2820  | 42.7067  | 20.9117  | 1.03015  | 0.00015 | 0.00437065 |
| NM_001634.4       | 262               | AMD1          | 3421  | 55.9037  | 29.3008  | 0.93200  | 0.00015 | 0.00437065 |
| TCONS_00196366    | XLOC_017565       | -             | 4542  | 0.676998 | 2.00249  | -1.56457 | 0.00015 | 0.00437065 |
| NM_015653.3       | 26150             | RIBC2         | 1396  | 3.66533  | 9.78658  | -1.41686 | 0.00015 | 0.00437065 |
| NM_007364.2       | 23423             | TMED3         | 1388  | 39.2003  | 19.8637  | 0.98073  | 0.00015 | 0.00437065 |
| NM_001908.3       | 1508              | CTSB          | 3783  | 135.595  | 61.0981  | 1.15011  | 0.00015 | 0.00437065 |
| NM_001165.3       | 330               | BIRC3         | 5229  | 77.5134  | 27.1518  | 1.51340  | 0.00015 | 0.00437065 |
| NM_013340.2       | 29930             | PCDHB1        | 2534  | 0.551842 | 2.04343  | -1.88866 | 0.00015 | 0.00437065 |
| NM_032785.3       | 84871             | AGBL4         | 2988  | 1.18264  | 4.94793  | -2.06481 | 0.00015 | 0.00437065 |
| NM_020801.2       | 57561             | ARRDC3        | 4161  | 154.907  | 54.3784  | 1.51030  | 0.00015 | 0.00437065 |
| NM_013249.2       | 7761              | ZNF214        | 2668  | 6.94882  | 14.8654  | -1.09712 | 0.00015 | 0.00437065 |
| NM_015065.2       | 23086             | EXPH5         | 10187 | 20.5618  | 40.9518  | -0.99396 | 0.00015 | 0.00437065 |
| NM_002704.3       | 5473              | PPBP          | 1307  | 1.0146   | 5.13818  | -2.34035 | 0.00015 | 0.00437065 |
| XM_003403516.1    | 285754            | FLJ37396      | 1633  | 0.628533 | 2.73586  | -2.12193 | 0.00015 | 0.00437065 |
| NM_013336.3       | 29927             | SEC61A1       | 3636  | 88.7533  | 47.2719  | 0.90882  | 0.00015 | 0.00437065 |
| 3493              | 3493              | -             | 1061  | 1474.25  | 410.424  | 1.84480  | 0.00015 | 0.00437065 |
| NM_000175.3       | 2821              | GPI           | 4194  | 31.833   | 17.2698  | 0.88227  | 0.00015 | 0.00437065 |
| NM_001136482.1    | 255809            | C19orf38      | 1089  | 4.53113  | 0.9874   | 2.19817  | 0.00015 | 0.00437065 |
| NM_001134363.1    | 282996            | RBM20         | 7233  | 1.92979  | 4.45379  | -1.20659 | 0.00015 | 0.00437065 |
| NM_138787.2       | 119710            | C11orf74      | 820   | 20.5905  | 46.46    | -1.17401 | 0.00015 | 0.00437065 |
| NM_014399.3       | 27075             | TSPAN13       | 1902  | 71.3301  | 37.5247  | 0.92667  | 0.00015 | 0.00437065 |
| NM_153209.3       | 124602            | KIF19         | 3643  | 2.52015  | 5.66254  | -1.16794 | 0.00015 | 0.00437065 |
| NM_032793.3       | 84879             | MFSD2A        | 2162  | 6.96654  | 2.42036  | 1.52522  | 0.00015 | 0.00437065 |
| NM_024893.1       | 79953             | SYNDIG1       | 2437  | 1.91458  | 0.447981 | 2.09552  | 0.00015 | 0.00437065 |
| NM_176813.3       | 155465            | AGR3          | 750   | 23.579   | 56.8907  | -1.27069 | 0.00015 | 0.00437065 |
| NM_004428.2       | 1942              | EFNA1         | 1566  | 17.6753  | 7.35142  | 1.26564  | 0.00015 | 0.00437065 |
| NM_001452.1       | 2295              | FOXF2         | 2187  | 2.91885  | 0.910452 | 1.68075  | 0.00015 | 0.00437065 |
| NM_006948.4       | 6782              | HSPA13        | 3987  | 35.16    | 19.5935  | 0.84356  | 0.00015 | 0.00437065 |
| NM_178527.3       | 284525            | SLC9A11       | 4427  | 0.874666 | 3.02734  | -1.79125 | 0.00015 | 0.00437065 |
| NM_022122.2       | 64066             | MMP27         | 1647  | 2.18426  | 0.376845 | 2.53510  | 0.00015 | 0.00437065 |
| NM_199242.2       | 201294            | UNC13D        | 4393  | 5.54494  | 2.20844  | 1.32815  | 0.00015 | 0.00437065 |
| NM_032965.4       | 6359              | CCL15         | 1080  | 1.17134  | 5.01141  | -2.09706 | 0.00015 | 0.00437065 |
| NM_014568.1       | 11227             | GALNT5        | 3131  | 22.0673  | 11.1739  | 0.98177  | 0.00015 | 0.00437065 |
| TCONS_00295272    | XLOC_025154       | -             | 2524  | 0.300143 | 1.61553  | -2.42828 | 0.00015 | 0.00437065 |
| NM_001031737.2    | 124093            | CCDC78        | 1611  | 6.69397  | 19.1913  | -1.51952 | 0.00015 | 0.00437065 |
| ENST00000544591.1 | ENSG00000256039.1 | RP11-291B21.2 | 868   | 0.79541  | 8.20819  | -3.36729 | 0.00015 | 0.00437065 |
| ENST00000448680.1 | ENSG00000233730.1 | RP4-666F24.3  | 491   | 4.49577  | 19.8548  | -2.14285 | 0.00015 | 0.00437065 |
| TCONS_00294490    | XLOC_025290       | -             | 672   | 1.20612  | 8.15802  | -2.75784 | 0.00015 | 0.00437065 |
| NM_000849.4       | 2947              | GSTM3         | 4127  | 8.9259   | 17.5574  | -0.97601 | 0.00015 | 0.00437065 |
| NM_003919.2       | 8910              | SGCE          | 1700  | 19.4801  | 37.4585  | -0.94330 | 0.00015 | 0.00437065 |
| NM_002515.2       | 4857              | NOVA1         | 3918  | 1.5878   | 4.41218  | -1.47446 | 0.00015 | 0.00437065 |
| NM_014325.2       | 23603             | CORO1C        | 3815  | 44.1993  | 23.725   | 0.89762  | 0.00015 | 0.00437065 |
| NM_002334.3       | 4038              | LRP4          | 8227  | 2.85108  | 6.31228  | -1.14665 | 0.00015 | 0.00437065 |
| NM_012248.2       | 22928             | SEPHS2        | 2273  | 15.0175  | 7.19117  | 1.06234  | 0.00015 | 0.00437065 |
| TCONS_00272364    | XLOC_022448       | -             | 770   | 22.3127  | 7.01655  | 1.66903  | 0.00015 | 0.00437065 |
| NM_004635.3       | 7867              | MAPKAPK3      | 2500  | 17.7582  | 8.69068  | 1.03094  | 0.00015 | 0.00437065 |
| NM_000270.3       | 4860              | PNP           | 2421  | 12.3639  | 5.71547  | 1.11319  | 0.00015 | 0.00437065 |
| TCONS_00187673    | XLOC_016076       | -             | 900   | 0.709876 | 4.93536  | -2.79752 | 0.00015 | 0.00437065 |
| NM_153449.2       | 144195            | SLC2A14       | 2195  | 2.0701   | 0.313593 | 2.72274  | 0.00015 | 0.00437065 |
| NM_080617.4       | 140689            | CBLN4         | 2508  | 0.125269 | 4.46969  | -5.15707 | 0.00015 | 0.00437065 |
| NM_019856.1       | 8736              | MYOM1         | 5559  | 0.915933 | 3.51762  | -1.94129 | 0.00015 | 0.00437065 |

|                |             |            |       |          |          |          |         |            |
|----------------|-------------|------------|-------|----------|----------|----------|---------|------------|
| NM_198507.1    | 345757      | FAM174A    | 1236  | 21.8669  | 45.0498  | -1.04277 | 0.00015 | 0.00437065 |
| NM_003039.2    | 6518        | SLC2A5     | 2438  | 2.47123  | 0.667059 | 1.88935  | 0.0002  | 0.00554203 |
| NM_173814.4    | 283659      | PRTG       | 11973 | 2.97784  | 5.65892  | -0.92626 | 0.0002  | 0.00554203 |
| NM_032865.5    | 84951       | TNS4       | 4072  | 6.5225   | 2.72352  | 1.25995  | 0.0002  | 0.00554203 |
| NM_198474.3    | 283298      | OLFML1     | 2905  | 7.09282  | 13.9819  | -0.97913 | 0.0002  | 0.00554203 |
| NM_024837.2    | 79895       | ATP8B4     | 5677  | 13.918   | 7.003    | 0.99090  | 0.0002  | 0.00554203 |
| NM_001731.2    | 694         | BTG1       | 4680  | 75.7144  | 36.3124  | 1.06010  | 0.0002  | 0.00554203 |
| NM_005194.2    | 1051        | CEBPB      | 1837  | 26.5616  | 13.4922  | 0.97722  | 0.0002  | 0.00554203 |
| NM_001007544.1 | 440712      | C1orf186   | 1129  | 13.5028  | 5.01827  | 1.42800  | 0.0002  | 0.00554203 |
| NM_003531.2    | 8352        | HIST1H3C   | 459   | 36.2829  | 11.4829  | 1.65980  | 0.0002  | 0.00554203 |
| NM_001813.2    | 1062        | CENPE      | 8612  | 3.42286  | 1.44054  | 1.24859  | 0.0002  | 0.00554203 |
| NM_014822.2    | 9871        | SEC24D     | 4063  | 27.8309  | 15.1497  | 0.87739  | 0.0002  | 0.00554203 |
| NM_001425.2    | 2014        | EMP3       | 829   | 35.1956  | 15.126   | 1.21837  | 0.0002  | 0.00554203 |
| NM_012391.1    | 25803       | SPDEF      | 1894  | 7.57825  | 2.79498  | 1.43903  | 0.0002  | 0.00554203 |
| NM_002530.2    | 4916        | NTRK3      | 2818  | 1.93064  | 8.48226  | -2.13537 | 0.0002  | 0.00554203 |
| NM_018371.4    | 55790       | CSGALNACT1 | 3872  | 12.7338  | 5.25233  | 1.27763  | 0.0002  | 0.00554203 |
| NM_003529.2    | 8350        | HIST1H3A   | 469   | 30.6004  | 10.3643  | 1.56194  | 0.0002  | 0.00554203 |
| NM_032040.3    | 83987       | CCDC8      | 3334  | 2.47606  | 6.2283   | -1.33079 | 0.0002  | 0.00554203 |
| NM_003874.3    | 8832        | CD84       | 8228  | 18.6677  | 9.73998  | 0.93856  | 0.0002  | 0.00554203 |
| NM_015055.2    | 23075       | SWAP70     | 4848  | 42.8351  | 23.316   | 0.87748  | 0.0002  | 0.00554203 |
| NM_152505.3    | 150082      | LCA5L      | 2364  | 3.26647  | 8.35169  | -1.35433 | 0.0002  | 0.00554203 |
| NM_015272.2    | 23322       | RPGRIP1L   | 6182  | 3.09297  | 8.38534  | -1.43888 | 0.0002  | 0.00554203 |
| NM_213607.1    | 388389      | CCDC103    | 1256  | 4.29614  | 11.6767  | -1.44252 | 0.0002  | 0.00554203 |
| NM_001079872.1 | 8450        | CUL4B      | 5184  | 68.2226  | 33.8128  | 1.01268  | 0.0002  | 0.00554203 |
| NM_001145451.2 | 100271715   | ARHGEF33   | 4304  | 0.930281 | 2.60222  | -1.48401 | 0.0002  | 0.00554203 |
| TCONS_00155291 | XLOC_013582 | -          | 1719  | 0.308636 | 2.36377  | -2.93711 | 0.0002  | 0.00554203 |
| NM_182539.3    | 202500      | TCTE1      | 1683  | 1.41797  | 4.64689  | -1.71244 | 0.0002  | 0.00554203 |
| NM_014330.3    | 23645       | PPP1R15A   | 2383  | 47.0427  | 24.4647  | 0.94327  | 0.0002  | 0.00554203 |
| NM_014876.5    | 9929        | JOSD1      | 3435  | 27.1316  | 14.6161  | 0.89242  | 0.0002  | 0.00554203 |
| NM_006265.2    | 5885        | RAD21      | 3750  | 115.353  | 60.121   | 0.94012  | 0.0002  | 0.00554203 |
| NM_001204376.1 | 4883        | NPR3       | 6380  | 4.74809  | 1.65885  | 1.51716  | 0.0002  | 0.00554203 |
| NM_006079.3    | 10370       | CITED2     | 1930  | 58.2174  | 28.8156  | 1.01460  | 0.0002  | 0.00554203 |
| NM_000165.3    | 2697        | GJA1       | 3130  | 139.442  | 58.3974  | 1.25569  | 0.0002  | 0.00554203 |
| NM_031912.4    | 83849       | SYT15      | 5508  | 6.15942  | 11.8717  | -0.94665 | 0.0002  | 0.00554203 |
| NM_138803.3    | 130940      | CCDC148    | 2846  | 2.53612  | 6.60708  | -1.38139 | 0.0002  | 0.00554203 |
| NM_005065.4    | 6400        | SEL1L      | 6579  | 81.8322  | 40.679   | 1.00838  | 0.0002  | 0.00554203 |
| NM_005906.4    | 4117        | MAK        | 3883  | 2.38789  | 7.00752  | -1.55316 | 0.0002  | 0.00554203 |
| NM_031294.3    | 83450       | LRRC48     | 2080  | 9.02474  | 20.9808  | -1.21711 | 0.0002  | 0.00554203 |
| NM_012081.5    | 22936       | ELL2       | 6046  | 47.9627  | 24.7787  | 0.95281  | 0.0002  | 0.00554203 |
| TCONS_00314598 | XLOC_026580 | -          | 3111  | 1.9928   | 0.161749 | 3.62297  | 0.0002  | 0.00554203 |
| NM_001008.3    | 6192        | RPS4Y1     | 897   | 235.471  | 86.9187  | 1.43781  | 0.0002  | 0.00554203 |
| NM_020530.4    | 5008        | OSM        | 1854  | 11.2806  | 0.132587 | 6.41076  | 0.0002  | 0.00554203 |
| NM_004962.3    | 2662        | GDF10      | 2650  | 0.340603 | 1.84113  | -2.43443 | 0.0002  | 0.00554203 |
| TCONS_00079878 | XLOC_006712 | -          | 3633  | 0.374562 | 2.39433  | -2.67635 | 0.0002  | 0.00554203 |
| NM_031419.3    | 64332       | NFKBIZ     | 3926  | 26.6871  | 3.11054  | 3.10091  | 0.0002  | 0.00554203 |
| NM_005063.4    | 6319        | SCD        | 5468  | 10.1292  | 5.18864  | 0.96509  | 0.0002  | 0.00554203 |
| NM_004710.3    | 9144        | SYNGR2     | 1694  | 27.0738  | 13.3931  | 1.01541  | 0.0002  | 0.00554203 |
| NM_181265.3    | 116966      | WDR17      | 7353  | 0.774493 | 2.15587  | -1.47695 | 0.0002  | 0.00554203 |
| NM_001005852.2 | 246126      | CYorf15A   | 865   | 30.3339  | 7.37494  | 2.04023  | 0.0002  | 0.00554203 |
| NM_139021.2    | 225689      | MAPK15     | 1888  | 2.39778  | 6.77467  | -1.49845 | 0.0002  | 0.00554203 |
| NM_018098.4    | 1894        | ECT2       | 3910  | 11.1194  | 5.43422  | 1.03293  | 0.0002  | 0.00554203 |
| NM_018290.3    | 55276       | PGM2       | 3238  | 22.5432  | 11.8047  | 0.93333  | 0.0002  | 0.00554203 |
| NM_176824.2    | 55212       | BBS7       | 3863  | 4.0925   | 9.52179  | -1.21825 | 0.00025 | 0.00665625 |
| NM_173662.2    | 285533      | RNF175     | 1569  | 0.968539 | 3.54207  | -1.87071 | 0.00025 | 0.00665625 |



|                |             |              |       |           |          |          |         |            |
|----------------|-------------|--------------|-------|-----------|----------|----------|---------|------------|
| NM_014708.4    | 9735        | KNTC1        | 6965  | 13.1954   | 7.32504  | 0.84913  | 0.00025 | 0.00665625 |
| NM_152357.2    | 126070      | ZNF440       | 4181  | 18.9243   | 34.1796  | -0.85289 | 0.00025 | 0.00665625 |
| NM_017982.3    | 55061       | SUSD4        | 3027  | 2.39564   | 6.00956  | -1.32685 | 0.00025 | 0.00665625 |
| NM_000847.4    | 2940        | GSTA3        | 915   | 0.650144  | 4.12801  | -2.66661 | 0.00025 | 0.00665625 |
| NM_001145204.2 | 729993      | SHISA9       | 6727  | 28.5477   | 61.3641  | -1.10402 | 0.00025 | 0.00665625 |
| NM_001143779.1 | 28981       | IFT81        | 2730  | 18.6581   | 36.3828  | -0.96346 | 0.00025 | 0.00665625 |
| NM_139284.2    | 163175      | LG14         | 2888  | 1.02399   | 2.90776  | -1.50571 | 0.00025 | 0.00665625 |
| NM_016639.2    | 51330       | TNFRSF12A    | 1033  | 16.4938   | 5.44979  | 1.59765  | 0.00025 | 0.00665625 |
| NM_007365.2    | 11240       | PADI2        | 4363  | 4.091     | 1.65124  | 1.30890  | 0.00025 | 0.00665625 |
| NM_024817.2    | 79875       | THSD4        | 9145  | 24.1337   | 46.0633  | -0.93257 | 0.00025 | 0.00665625 |
| TCONS_00219349 | XLOC_019061 | -            | 2754  | 1.0001    | 3.12248  | -1.64255 | 0.00025 | 0.00665625 |
| NM_174899.4    | 130888      | FBXO36       | 2815  | 5.9596    | 12.6261  | -1.08312 | 0.00025 | 0.00665625 |
| NM_152864.3    | 128414      | NKAIN4       | 1430  | 0.489232  | 2.45336  | -2.32617 | 0.00025 | 0.00665625 |
| TCONS_00087575 | XLOC_007492 | -            | 3315  | 0.0804485 | 1.27903  | -3.99084 | 0.00025 | 0.00665625 |
| NM_000600.3    | 3569        | IL6          | 1184  | 13.8138   | 0.225503 | 5.93682  | 0.00025 | 0.00665625 |
| NM_000641.2    | 3589        | IL11         | 2354  | 1.87655   | 0.433672 | 2.11341  | 0.00025 | 0.00665625 |
| NM_002087.2    | 2896        | GRN          | 2305  | 47.392    | 25.241   | 0.90887  | 0.00025 | 0.00665625 |
| NM_018012.3    | 55083       | KIF26B       | 7287  | 3.0548    | 1.36061  | 1.16682  | 0.00025 | 0.00665625 |
| NM_015492.4    | 56905       | C15orf39     | 4427  | 5.89063   | 2.73349  | 1.10768  | 0.00025 | 0.00665625 |
| NM_001289.4    | 1193        | CLIC2        | 2686  | 17.9547   | 9.31415  | 0.94687  | 0.00025 | 0.00665625 |
| NM_002826.4    | 5768        | QSOX1        | 3316  | 17.7402   | 8.1741   | 1.11789  | 0.00025 | 0.00665625 |
| NM_145740.3    | 2938        | GSTA1        | 1259  | 34.6795   | 72.8064  | -1.06998 | 0.00025 | 0.00665625 |
| TCONS_00000276 | XLOC_000058 | -            | 1132  | 0.706646  | 5.01879  | -2.82828 | 0.00025 | 0.00665625 |
| NM_024667.2    | 79720       | VPS37B       | 2749  | 11.6403   | 5.36962  | 1.11623  | 0.00025 | 0.00665625 |
| NM_006685.3    | 10879       | SMR3B        | 785   | 5.9163    | 0.904048 | 2.71022  | 0.00025 | 0.00665625 |
| NM_014890.2    | 11259       | FILIP1L      | 3274  | 42.7503   | 20.3451  | 1.07125  | 0.00025 | 0.00665625 |
| NM_153274.2    | 266675      | BEST4        | 2096  | 0.959201  | 3.22982  | -1.75155 | 0.00025 | 0.00665625 |
| NM_004458.2    | 2182        | ACSL4        | 5023  | 55.5212   | 24.4454  | 1.18348  | 0.00025 | 0.00665625 |
| NM_201286.3    | 158880      | USP51        | 4403  | 3.00494   | 6.41735  | -1.09464 | 0.00025 | 0.00665625 |
| NM_020848.2    | 57608       | KIAA1462     | 9300  | 11.7107   | 21.0118  | -0.84338 | 0.00025 | 0.00665625 |
| NM_004313.3    | 409         | ARRB2        | 1919  | 19.7064   | 9.01804  | 1.12778  | 0.00025 | 0.00665625 |
| NM_021977.2    | 6581        | SLC22A3      | 5624  | 0.754229  | 2.0226   | -1.42314 | 0.00025 | 0.00665625 |
| NM_024734.3    | 79789       | CLMN         | 12750 | 10.5408   | 19.9674  | -0.92166 | 0.00025 | 0.00665625 |
| NM_032744.3    | 84830       | C6orf105     | 1804  | 5.39781   | 1.50068  | 1.84676  | 0.00025 | 0.00665625 |
| NM_032977.3    | 843         | CASP10       | 5906  | 8.93825   | 4.33585  | 1.04368  | 0.00025 | 0.00665625 |
| TCONS_00281525 | XLOC_024216 | -            | 3339  | 0.829399  | 2.89085  | -1.80136 | 0.00025 | 0.00665625 |
| NM_001097589.1 | 6707        | SPRR3        | 902   | 5.92007   | 0.327627 | 4.17549  | 0.00025 | 0.00665625 |
| NM_078483.2    | 206358      | SLC36A1      | 5773  | 5.94467   | 3.06848  | 0.95407  | 0.00025 | 0.00665625 |
| NM_016235.1    | 51704       | GPRC5B       | 2845  | 27.1547   | 50.93    | -0.90731 | 0.00025 | 0.00665625 |
| TCONS_00023764 | XLOC_000192 | -            | 17064 | 4.18686   | 10.3915  | -1.31146 | 0.00025 | 0.00665625 |
| TCONS_00180095 | XLOC_015624 | -            | 1504  | 0.454408  | 2.43413  | -2.42134 | 0.00025 | 0.00665625 |
| TCONS_00173159 | XLOC_014288 | -            | 1849  | 0.482068  | 2.46775  | -2.35589 | 0.00025 | 0.00665625 |
| NM_005508.4    | 1233        | CCR4         | 1657  | 8.70532   | 3.11228  | 1.48393  | 0.00025 | 0.00665625 |
| NM_001160130.1 | 56479       | KCNQ5        | 6556  | 0.71944   | 1.97105  | -1.45402 | 0.0003  | 0.00772176 |
| NM_012431.2    | 9723        | SEMA3E       | 6629  | 0.205248  | 1.91219  | -3.21979 | 0.0003  | 0.00772176 |
| NM_033130.4    | 89790       | SIGLEC10     | 3394  | 3.64689   | 0.928569 | 1.97358  | 0.0003  | 0.00772176 |
| NM_016623.3    | 51571       | FAM49B       | 2196  | 41.3185   | 21.7082  | 0.92854  | 0.0003  | 0.00772176 |
| NM_000059.3    | 675         | BRCA2        | 11386 | 5.26711   | 2.76446  | 0.93001  | 0.0003  | 0.00772176 |
| NM_001061.4    | 6916        | TBXAS1       | 2066  | 12.0886   | 4.17404  | 1.53413  | 0.0003  | 0.00772176 |
| NM_003006.4    | 6404        | SELPLG       | 2573  | 15.6738   | 7.42515  | 1.07787  | 0.0003  | 0.00772176 |
| NM_138770.1    | 90557       | CCDC74A      | 1457  | 4.02284   | 10.5368  | -1.38915 | 0.0003  | 0.00772176 |
| NM_004468.3    | 2275        | FHL3         | 1704  | 5.23442   | 1.93055  | 1.43902  | 0.0003  | 0.00772176 |
| NM_003878.2    | 8836        | GGH          | 1493  | 14.276    | 6.233    | 1.19560  | 0.0003  | 0.00772176 |
| XM_003403521.1 | 100652860   | LOC100652860 | 1520  | 2.63232   | 7.85582  | -1.57743 | 0.0003  | 0.00772176 |

|                |             |           |      |          |          |          |         |            |
|----------------|-------------|-----------|------|----------|----------|----------|---------|------------|
| NM_001017420.2 | 157570      | ESCO2     | 3359 | 1.75667  | 0.500615 | 1.81107  | 0.0003  | 0.00772176 |
| NM_001114.3    | 113         | ADCY7     | 6138 | 12.806   | 6.73072  | 0.92798  | 0.0003  | 0.00772176 |
| NM_152754.2    | 223117      | SEMA3D    | 6261 | 6.78436  | 12.4977  | -0.88138 | 0.0003  | 0.00772176 |
| NM_000478.4    | 249         | ALPL      | 2596 | 4.1073   | 9.76129  | -1.24888 | 0.0003  | 0.00772176 |
| NM_001093772.1 | 3815        | KIT       | 5164 | 26.3922  | 13.3     | 0.98869  | 0.0003  | 0.00772176 |
| TCONS_00112232 | XLOC_009588 | -         | 3307 | 3.65708  | 9.16718  | -1.32579 | 0.0003  | 0.00772176 |
| NM_006367.3    | 10487       | CAP1      | 2773 | 98.7364  | 44.2391  | 1.15826  | 0.0003  | 0.00772176 |
| NM_003840.3    | 8793        | TNFRSF10D | 3535 | 8.11859  | 3.70223  | 1.13283  | 0.0003  | 0.00772176 |
| NM_025201.4    | 80301       | PLEKHO2   | 3721 | 16.6043  | 8.5641   | 0.95518  | 0.0003  | 0.00772176 |
| NM_007191.4    | 11197       | WIF1      | 2240 | 0.104994 | 3.76249  | -5.16331 | 0.0003  | 0.00772176 |
| NM_015900.3    | 51365       | PLA1A     | 1780 | 10.9356  | 3.08154  | 1.82731  | 0.0003  | 0.00772176 |
| NM_022355.2    | 64174       | DPEP2     | 1709 | 3.63164  | 0.942105 | 1.94666  | 0.0003  | 0.00772176 |
| NM_023009.5    | 65108       | MARCKSL1  | 1546 | 22.2247  | 11.0331  | 1.01033  | 0.0003  | 0.00772176 |
| NM_005542.4    | 3638        | INSIG1    | 3010 | 40.8928  | 19.2653  | 1.08584  | 0.0003  | 0.00772176 |
| NM_006083.3    | 3550        | IK        | 1935 | 72.0982  | 134.404  | -0.89855 | 0.0003  | 0.00772176 |
| NM_005239.4    | 2114        | ETS2      | 3672 | 80.8129  | 44.3188  | 0.86667  | 0.0003  | 0.00772176 |
| TCONS_00245230 | XLOC_019931 | -         | 1702 | 0.910424 | 3.48025  | -1.93458 | 0.0003  | 0.00772176 |
| NM_021135.4    | 6196        | RPS6KA2   | 5817 | 12.6044  | 6.54418  | 0.94564  | 0.0003  | 0.00772176 |
| NM_006061.2    | 10321       | CRISP3    | 2219 | 0.234158 | 2.28608  | -3.28732 | 0.0003  | 0.00772176 |
| NM_001199149.1 | 4057        | LTF       | 2508 | 243.987  | 102.844  | 1.24635  | 0.0003  | 0.00772176 |
| NM_001175.4    | 397         | ARHGDI1   | 1216 | 150.498  | 79.4677  | 0.92130  | 0.0003  | 0.00772176 |
| NM_001122769.2 | 167691      | LCA5      | 4564 | 11.3306  | 22.1913  | -0.96976 | 0.0003  | 0.00772176 |
| NM_015448.1    | 25911       | DPCD      | 799  | 11.9766  | 28.6734  | -1.25949 | 0.0003  | 0.00772176 |
| NM_139072.3    | 92737       | DNER      | 3272 | 0.930212 | 2.86434  | -1.62257 | 0.0003  | 0.00772176 |
| NM_001497.3    | 2683        | B4GALT1   | 4199 | 35.1162  | 18.777   | 0.90317  | 0.0003  | 0.00772176 |
| NM_144965.1    | 158248      | TTC16     | 2884 | 1.50091  | 5.56205  | -1.88977 | 0.0003  | 0.00772176 |
| NM_001063.3    | 7018        | TF        | 2791 | 1.42997  | 4.31891  | -1.59468 | 0.00035 | 0.00869612 |
| NM_152793.2    | 222166      | C7orf41   | 5814 | 16.2493  | 29.7241  | -0.87125 | 0.00035 | 0.00869612 |
| NM_001192.2    | 608         | TNFRSF17  | 994  | 18.0928  | 7.18924  | 1.33151  | 0.00035 | 0.00869612 |
| NM_003564.1    | 8407        | TAGLN2    | 1360 | 136.581  | 73.5734  | 0.89250  | 0.00035 | 0.00869612 |
| NM_001206602.1 | 1123        | CHN1      | 2294 | 18.4304  | 6.87212  | 1.42326  | 0.00035 | 0.00869612 |
| NM_001025195.1 | 1066        | CES1      | 2013 | 22.3099  | 56.7756  | -1.34758 | 0.00035 | 0.00869612 |
| NM_001130918.1 | 284076      | TTLL6     | 3454 | 0.372245 | 1.61275  | -2.11520 | 0.00035 | 0.00869612 |
| NM_015364.4    | 23643       | LY96      | 622  | 31.0977  | 11.2909  | 1.46165  | 0.00035 | 0.00869612 |
| NM_006887.4    | 678         | ZFP36L2   | 3693 | 65.4823  | 34.4541  | 0.92643  | 0.00035 | 0.00869612 |
| NM_017510.4    | 54732       | TMED9     | 1402 | 41.9046  | 22.3241  | 0.90850  | 0.00035 | 0.00869612 |
| NM_004778.2    | 11251       | GPR44     | 2910 | 6.43424  | 0.421858 | 3.93094  | 0.00035 | 0.00869612 |
| NM_001128227.2 | 10020       | GNE       | 5298 | 18.2042  | 7.74155  | 1.23358  | 0.00035 | 0.00869612 |
| NM_012479.3    | 7532        | YWHAG     | 3747 | 35.5102  | 20.0541  | 0.82434  | 0.00035 | 0.00869612 |
| NM_001823.3    | 1152        | CKB       | 1431 | 10.0316  | 21.7765  | -1.11822 | 0.00035 | 0.00869612 |
| NM_144629.2    | 130132      | RFTN2     | 3113 | 6.25175  | 12.9838  | -1.05438 | 0.00035 | 0.00869612 |
| NM_001114357.1 | 441054      | C4orf47   | 974  | 3.82704  | 20.4128  | -2.41517 | 0.00035 | 0.00869612 |
| NM_145739.2    | 114880      | OSBPL6    | 6811 | 1.05267  | 7.64767  | -2.86096 | 0.00035 | 0.00869612 |
| NM_002483.4    | 4680        | CEACAM6   | 2631 | 17.4981  | 32.4239  | -0.88986 | 0.00035 | 0.00869612 |
| NM_004675.2    | 9077        | DIRAS3    | 1631 | 7.05424  | 2.58486  | 1.44840  | 0.00035 | 0.00869612 |
| 3497           | 3497        | -         | 1286 | 12.7504  | 0.203681 | 5.96810  | 0.00035 | 0.00869612 |
| NM_198565.1    | 375387      | LRRC33    | 2465 | 4.4759   | 1.56693  | 1.51424  | 0.00035 | 0.00869612 |
| NM_004219.2    | 9232        | PTTG1     | 712  | 19.1929  | 6.80822  | 1.49522  | 0.00035 | 0.00869612 |
| NM_005100.3    | 9590        | AKAP12    | 8434 | 19.1537  | 47.4702  | -1.30940 | 0.00035 | 0.00869612 |
| NM_033063.1    | 4135        | MAP6      | 2648 | 6.27087  | 14.6765  | -1.22677 | 0.00035 | 0.00869612 |
| NM_032782.3    | 84868       | HAVCR2    | 2320 | 13.6584  | 6.50569  | 1.07001  | 0.00035 | 0.00869612 |
| NM_015041.1    | 23059       | CLUAP1    | 1661 | 20.9951  | 45.4983  | -1.11576 | 0.00035 | 0.00869612 |
| NM_014331.3    | 23657       | SLC7A11   | 9648 | 1.93159  | 0.862837 | 1.16263  | 0.00035 | 0.00869612 |
| NM_017424.2    | 51816       | CECR1     | 3927 | 23.899   | 9.39168  | 1.34749  | 0.00035 | 0.00869612 |

|                |             |           |       |          |          |          |         |            |
|----------------|-------------|-----------|-------|----------|----------|----------|---------|------------|
| NM_001145808.1 | 3684        | ITGAM     | 4745  | 6.56814  | 1.10866  | 2.56667  | 0.00035 | 0.00869612 |
| NM_013345.2    | 29933       | GPR132    | 3636  | 3.60995  | 1.37817  | 1.38922  | 0.00035 | 0.00869612 |
| NM_020675.3    | 57405       | SPC25     | 1346  | 15.2114  | 31.0655  | -1.03016 | 0.00035 | 0.00869612 |
| NM_003509.2    | 8329        | HIST1H2AI | 469   | 19.511   | 4.52326  | 2.10885  | 0.00035 | 0.00869612 |
| TCONS_00305796 | XLOC_026031 | -         | 9171  | 0.427449 | 1.65002  | -1.94866 | 0.00035 | 0.00869612 |
| NM_003383.3    | 7436        | VLDLR     | 3636  | 3.39324  | 13.4397  | -1.98577 | 0.00035 | 0.00869612 |
| TCONS_00294953 | XLOC_024750 | -         | 6915  | 1.55244  | 3.33333  | -1.10243 | 0.00035 | 0.00869612 |
| TCONS_00106634 | XLOC_008067 | -         | 5143  | 1.39528  | 5.32095  | -1.93112 | 0.00035 | 0.00869612 |
| NM_004566.3    | 5209        | PFKFB3    | 4550  | 12.7629  | 3.01094  | 2.08367  | 0.00035 | 0.00869612 |
| NM_007356.2    | 22798       | LAMB4     | 5858  | 1.02813  | 0.274688 | 1.90415  | 0.00035 | 0.00869612 |
| NM_006500.2    | 4162        | MCAM      | 3332  | 37.3498  | 20.2808  | 0.88099  | 0.00035 | 0.00869612 |
| NM_006009.2    | 7846        | TUBA1A    | 1666  | 131.023  | 245.314  | -0.90480 | 0.00035 | 0.00869612 |
| NM_173855.4    | 283385      | MORN3     | 1158  | 2.43195  | 7.54159  | -1.63275 | 0.0004  | 0.00971957 |
| NM_001995.2    | 2180        | ACSL1     | 3805  | 28.196   | 15.5685  | 0.85687  | 0.0004  | 0.00971957 |
| NM_018725.3    | 55540       | IL17RB    | 2040  | 9.24144  | 3.93406  | 1.23210  | 0.0004  | 0.00971957 |
| NM_001114753.1 | 2022        | ENG       | 3060  | 14.5795  | 6.74605  | 1.11183  | 0.0004  | 0.00971957 |
| NM_002086.4    | 2885        | GRB2      | 3303  | 40.1911  | 22.6549  | 0.82705  | 0.0004  | 0.00971957 |
| NM_004196.3    | 8814        | CDKL1     | 1177  | 3.03262  | 8.55833  | -1.49676 | 0.0004  | 0.00971957 |
| NM_002558.2    | 5023        | P2RX1     | 2864  | 3.54157  | 1.29774  | 1.44839  | 0.0004  | 0.00971957 |
| NM_001118890.1 | 2745        | GLRX      | 1079  | 30.1375  | 13.2694  | 1.18346  | 0.0004  | 0.00971957 |
| NM_006516.2    | 6513        | SLC2A1    | 3670  | 16.4512  | 8.73311  | 0.91362  | 0.0004  | 0.00971957 |
| NM_182658.1    | 359710      | C20orf185 | 1454  | 12.1176  | 3.4163   | 1.82659  | 0.0004  | 0.00971957 |
| NM_015120.4    | 7840        | ALMS1     | 12922 | 16.779   | 32.2293  | -0.94172 | 0.0004  | 0.00971957 |
| NM_022468.4    | 64386       | MMP25     | 3554  | 2.09125  | 0.342762 | 2.60909  | 0.0004  | 0.00971957 |
| NM_018947.5    | 54205       | CYCS      | 5538  | 24.6501  | 13.9702  | 0.81924  | 0.0004  | 0.00971957 |
| NM_002831.5    | 5777        | PTPN6     | 2246  | 18.7746  | 6.36875  | 1.55970  | 0.0004  | 0.00971957 |
| NM_005924.4    | 4223        | MEOX2     | 2371  | 1.25624  | 3.52826  | -1.48984 | 0.0004  | 0.00971957 |
| NM_033413.3    | 90506       | LRRC46    | 1922  | 4.83268  | 16.8054  | -1.79803 | 0.0004  | 0.00971957 |
| NM_000343.3    | 6523        | SLC5A1    | 5061  | 2.30198  | 0.800905 | 1.52317  | 0.0004  | 0.00971957 |
| NM_014840.2    | 9891        | NUAK1     | 6821  | 20.8067  | 11.7354  | 0.82618  | 0.0004  | 0.00971957 |
| NM_015687.2    | 27145       | FILIP1    | 4622  | 7.91738  | 14.749   | -0.89752 | 0.0004  | 0.00971957 |
| NM_199355.2    | 170692      | ADAMTS18  | 5913  | 2.74299  | 1.04327  | 1.39464  | 0.0004  | 0.00971957 |
| XM_003403417.1 | 339457      | C1orf222  | 2762  | 0.437882 | 1.60667  | -1.87546 | 0.0004  | 0.00971957 |
| NM_004047.3    | 533         | ATP6V0B   | 1022  | 35.7312  | 16.9467  | 1.07618  | 0.0004  | 0.00971957 |
| NM_003816.2    | 8754        | ADAM9     | 4099  | 76.7869  | 41.2413  | 0.89677  | 0.0004  | 0.00971957 |
| NM_002627.4    | 5214        | PFKP      | 2657  | 24.4175  | 13.2778  | 0.87890  | 0.0004  | 0.00971957 |
| NM_032554.3    | 27198       | HCAR1     | 2977  | 2.06794  | 4.83009  | -1.22386 | 0.0004  | 0.00971957 |
| NM_130386.2    | 81035       | COLEC12   | 3134  | 31.4666  | 57.4232  | -0.86781 | 0.0004  | 0.00971957 |
| 3507           | 3507        | -         | 1486  | 135.167  | 61.5317  | 1.13534  | 0.0004  | 0.00971957 |
| NM_014734.3    | 9766        | KIAA0247  | 5393  | 20.1116  | 11.159   | 0.84983  | 0.0004  | 0.00971957 |
| NM_006295.2    | 7407        | VARS      | 4294  | 7.31425  | 3.52078  | 1.05481  | 0.0004  | 0.00971957 |
| NM_206918.2    | 123099      | DEGS2     | 1405  | 2.9938   | 8.04766  | -1.42659 | 0.0004  | 0.00971957 |
| TCONS_00222224 | XLOC_019184 | -         | 1701  | 0.27809  | 1.50737  | -2.43841 | 0.0004  | 0.00971957 |
| NM_002124.2    | 3123        | HLA-DRB1  | 1166  | 207.494  | 112.018  | 0.88933  | 0.00045 | 0.0106989  |
| NM_004362.2    | 1047        | CLGN      | 2738  | 1.16271  | 3.45497  | -1.57118 | 0.00045 | 0.0106989  |
| TCONS_00229226 | XLOC_018711 | -         | 2071  | 0.254734 | 1.20096  | -2.23712 | 0.00045 | 0.0106989  |
| NM_001005738.1 | 2358        | FPR2      | 1913  | 2.70072  | 0.818838 | 1.72169  | 0.00045 | 0.0106989  |
| NM_022475.2    | 64399       | HHIP      | 3555  | 2.48985  | 0.89534  | 1.47555  | 0.00045 | 0.0106989  |
| NM_005529.5    | 3339        | HSPG2     | 14288 | 19.8768  | 10.9071  | 0.86582  | 0.00045 | 0.0106989  |
| NM_005940.3    | 4320        | MMP11     | 2261  | 6.91969  | 2.48215  | 1.47912  | 0.00045 | 0.0106989  |
| NM_001827.1    | 1164        | CKS2      | 613   | 15.6111  | 5.01207  | 1.63909  | 0.00045 | 0.0106989  |
| NM_000441.1    | 5172        | SLC26A4   | 4930  | 2.74147  | 1.16855  | 1.23023  | 0.00045 | 0.0106989  |
| NM_003256.3    | 7079        | TIMP4     | 1633  | 1.1539   | 4.97141  | -2.10713 | 0.00045 | 0.0106989  |
| NM_033646.1    | 1005        | CDH7      | 2728  | 0.202864 | 1.13984  | -2.49025 | 0.00045 | 0.0106989  |

|                   |                   |              |      |          |          |          |         |           |
|-------------------|-------------------|--------------|------|----------|----------|----------|---------|-----------|
| TCONS_00160811    | XLOC_013647       | -            | 2061 | 3.43993  | 1.11116  | 1.63032  | 0.00045 | 0.0106989 |
| NM_000328.2       | 6103              | RPGR         | 3072 | 8.51408  | 17.4858  | -1.03826 | 0.00045 | 0.0106989 |
| NM_004951.4       | 1880              | GPR183       | 1785 | 63.8621  | 17.0316  | 1.90675  | 0.00045 | 0.0106989 |
| NM_021237.3       | 58515             | SELK         | 818  | 54.368   | 26.596   | 1.03155  | 0.00045 | 0.0106989 |
| NM_139239.1       | 84807             | NFKBID       | 1834 | 3.01556  | 0.961743 | 1.64870  | 0.00045 | 0.0106989 |
| NM_153267.4       | 256691            | MAMDC2       | 3618 | 5.04728  | 10.0174  | -0.98893 | 0.00045 | 0.0106989 |
| NM_001623.3       | 199               | AIF1         | 639  | 68.8854  | 32.3159  | 1.09195  | 0.00045 | 0.0106989 |
| NM_004716.2       | 9159              | PCSK7        | 3484 | 16.9457  | 9.18128  | 0.88415  | 0.00045 | 0.0106989 |
| NM_001105248.1    | 79838             | TMC5         | 4917 | 18.3726  | 33.7987  | -0.87941 | 0.00045 | 0.0106989 |
| NM_000370.3       | 7274              | TTPA         | 2633 | 1.74409  | 0.473305 | 1.88163  | 0.00045 | 0.0106989 |
| NM_003446.3       | 7712              | ZNF157       | 1695 | 1.71162  | 4.81562  | -1.49236 | 0.00045 | 0.0106989 |
| NM_013231.4       | 23768             | FLRT2        | 7179 | 13.521   | 25.2854  | -0.90311 | 0.00045 | 0.0106989 |
| NM_138780.2       | 94122             | SYTL5        | 4726 | 4.16459  | 1.08603  | 1.93911  | 0.00045 | 0.0106989 |
| NM_022338.3       | 53838             | C11orf24     | 2102 | 9.02373  | 3.89624  | 1.21164  | 0.00045 | 0.0106989 |
| NM_015683.1       | 27106             | ARRDC2       | 2503 | 4.21371  | 12.8754  | -1.61146 | 0.00045 | 0.0106989 |
| NM_024022.2       | 64699             | TMPRSS3      | 2441 | 2.68059  | 6.56976  | -1.29329 | 0.00045 | 0.0106989 |
| NM_001042406.1    | 54511             | HMGCLL1      | 2471 | 0.186472 | 1.10454  | -2.56641 | 0.00045 | 0.0106989 |
| TCONS_00110343    | XLOC_009597       | -            | 211  | 0        | 6.70357  | #NAME?   | 0.0005  | 0.0116249 |
| NM_001122961.1    | 127003            | C1orf194     | 731  | 2.47585  | 9.08611  | -1.87574 | 0.0005  | 0.0116249 |
| NM_020980.3       | 366               | AQP9         | 3021 | 3.48455  | 1.30761  | 1.41404  | 0.0005  | 0.0116249 |
| TCONS_00265890    | XLOC_022389       | -            | 2835 | 0.21354  | 1.30767  | -2.61443 | 0.0005  | 0.0116249 |
| TCONS_00220393    | XLOC_019116       | -            | 2293 | 0.560533 | 2.08117  | -1.89253 | 0.0005  | 0.0116249 |
| TCONS_00137738    | XLOC_011479       | -            | 1463 | 1.91641  | 5.56089  | -1.53691 | 0.0005  | 0.0116249 |
| ENST00000558411.1 | ENSG00000259641.1 | RP11-279F6.3 | 2121 | 0.165951 | 1.19357  | -2.84645 | 0.0005  | 0.0116249 |
| NM_001197294.1    | 1809              | DPYSL3       | 5480 | 30.2441  | 11.0359  | 1.45444  | 0.0005  | 0.0116249 |
| NM_005675.4       | 8214              | DGCR6        | 1214 | 2.59933  | 7.40628  | -1.51061 | 0.0005  | 0.0116249 |
| NM_000474.3       | 7291              | TWIST1       | 1666 | 22.5829  | 42.654   | -0.91745 | 0.0005  | 0.0116249 |
| NM_004827.2       | 9429              | ABCG2        | 4431 | 7.87008  | 14.5931  | -0.89084 | 0.0005  | 0.0116249 |
| NM_001142806.1    | 6535              | SLC6A8       | 3114 | 11.4544  | 3.06337  | 1.90271  | 0.0005  | 0.0116249 |
| NM_005911.5       | 4144              | MAT2A        | 3006 | 93.8205  | 44.6326  | 1.07181  | 0.0005  | 0.0116249 |
| NM_017866.5       | 54968             | TMEM70       | 2085 | 10.9542  | 5.01626  | 1.12680  | 0.0005  | 0.0116249 |
| NM_001845.4       | 1282              | COL4A1       | 6532 | 64.9969  | 33.6388  | 0.95025  | 0.0005  | 0.0116249 |
| NM_004999.3       | 4646              | MYO6         | 8662 | 32.2758  | 18.063   | 0.83742  | 0.0005  | 0.0116249 |
| NM_016021.2       | 51465             | UBE2J1       | 4342 | 57.9104  | 31.4501  | 0.88076  | 0.0005  | 0.0116249 |
| NM_198493.2       | 339416            | ANKRD45      | 2671 | 3.99316  | 8.84328  | -1.14705 | 0.0005  | 0.0116249 |
| NM_000775.2       | 1573              | CYP2J2       | 1857 | 12.5142  | 25.523   | -1.02823 | 0.0005  | 0.0116249 |
| ENST00000442765.1 | ENSG00000234456.3 | MAGI2-AS3    | 679  | 4.31956  | 12.4876  | -1.53153 | 0.0005  | 0.0116249 |
| NM_006531.3       | 8100              | IFT88        | 2931 | 11.5669  | 23.0606  | -0.99544 | 0.0005  | 0.0116249 |
| NM_001007595.2    | 388125            | C2CD4B       | 1576 | 1.86885  | 0.186148 | 3.32763  | 0.0005  | 0.0116249 |
| NM_178568.2       | 146760            | RTN4RL1      | 3164 | 0.702349 | 2.17195  | -1.62873 | 0.0005  | 0.0116249 |
| TCONS_00155060    | XLOC_015232       | -            | 1058 | 0.533702 | 2.81792  | -2.40053 | 0.0005  | 0.0116249 |
| NM_012329.2       | 23531             | MMD          | 2723 | 11.5101  | 5.67744  | 1.01958  | 0.0005  | 0.0116249 |
| NM_145307.2       | 219790            | RTKN2        | 6641 | 3.15004  | 1.42742  | 1.14196  | 0.0005  | 0.0116249 |
| NM_031286.3       | 83442             | SH3BGRL3     | 1115 | 39.3848  | 20.0332  | 0.97525  | 0.00055 | 0.0124813 |
| NM_002118.4       | 3109              | HLA-DMB      | 1397 | 58.0641  | 31.0085  | 0.90498  | 0.00055 | 0.0124813 |
| NM_145256.2       | 126364            | LRRC25       | 2403 | 4.71784  | 1.85519  | 1.34656  | 0.00055 | 0.0124813 |
| NM_000882.3       | 3592              | IL12A        | 1443 | 0.52224  | 2.11017  | -2.01457 | 0.00055 | 0.0124813 |
| NM_021181.3       | 57823             | SLAMF7       | 2657 | 27.8412  | 14.606   | 0.93066  | 0.00055 | 0.0124813 |
| NM_007168.2       | 10351             | ABCA8        | 5721 | 9.86593  | 18.1548  | -0.87983 | 0.00055 | 0.0124813 |
| NM_018689.1       | 57214             | KIAA1199     | 7080 | 8.91771  | 4.80909  | 0.89091  | 0.00055 | 0.0124813 |
| NM_006097.3       | 10398             | MYL9         | 1187 | 85.8833  | 45.9514  | 0.90227  | 0.00055 | 0.0124813 |
| NM_015000.3       | 23012             | STK38L       | 5098 | 31.3333  | 17.5419  | 0.83690  | 0.00055 | 0.0124813 |
| NM_004430.2       | 1960              | EGR3         | 4334 | 2.41756  | 0.243423 | 3.31202  | 0.00055 | 0.0124813 |
| NM_014256.3       | 10331             | B3GNT3       | 2720 | 4.72058  | 1.93042  | 1.29005  | 0.00055 | 0.0124813 |

|                   |                   |               |       |           |          |          |         |           |
|-------------------|-------------------|---------------|-------|-----------|----------|----------|---------|-----------|
| NM_003254.2       | 7076              | TIMP1         | 916   | 127.571   | 61.3496  | 1.05618  | 0.00055 | 0.0124813 |
| NM_006825.3       | 10970             | CKAP4         | 3036  | 29.5724   | 16.6217  | 0.83119  | 0.00055 | 0.0124813 |
| NM_152765.3       | 254778            | C8orf46       | 3465  | 0.504583  | 1.60975  | -1.67367 | 0.00055 | 0.0124813 |
| NM_003611.2       | 8481              | OFD1          | 3651  | 16.2443   | 29.4224  | -0.85698 | 0.00055 | 0.0124813 |
| TCONS_00199315    | XLOC_017063       | -             | 2547  | 0.200296  | 1.049    | -2.38881 | 0.00055 | 0.0124813 |
| NM_004961.3       | 2564              | GABRE         | 3152  | 2.83253   | 6.26439  | -1.14508 | 0.00055 | 0.0124813 |
| NM_001144956.1    | 284485            | RIIAD1        | 455   | 6.99389   | 20.8801  | -1.57796 | 0.00055 | 0.0124813 |
| NM_014618.2       | 1620              | DBC1          | 3196  | 4.26732   | 1.64308  | 1.37693  | 0.00055 | 0.0124813 |
| NM_017551.2       | 2894              | GRID1         | 5849  | 1.36616   | 3.10595  | -1.18491 | 0.00055 | 0.0124813 |
| NM_031311.3       | 54504             | CPVL          | 1691  | 54.4294   | 29.4203  | 0.88758  | 0.00055 | 0.0124813 |
| NM_152784.3       | 257062            | TMEM146       | 2513  | 0.470021  | 1.66889  | -1.82809 | 0.00055 | 0.0124813 |
| NM_031308.1       | 83481             | EPPK1         | 7273  | 6.60137   | 3.57998  | 0.88281  | 0.00055 | 0.0124813 |
| NM_004104.4       | 2194              | FASN          | 8458  | 4.86973   | 2.48737  | 0.96922  | 0.00055 | 0.0124813 |
| NM_018931.2       | 56125             | PCDHB11       | 3271  | 1.01013   | 2.81169  | -1.47690 | 0.00055 | 0.0124813 |
| NM_002158.3       | 3344              | FOXN2         | 5463  | 25.1634   | 14.1164  | 0.83396  | 0.00055 | 0.0124813 |
| NM_025257.2       | 80736             | SLC44A4       | 2634  | 23.7482   | 42.5119  | -0.84005 | 0.00055 | 0.0124813 |
| NM_002372.2       | 4124              | MAN2A1        | 5128  | 32.7002   | 18.5905  | 0.81474  | 0.00055 | 0.0124813 |
| NM_153269.2       | 140680            | C20orf96      | 1604  | 4.73242   | 10.6097  | -1.16473 | 0.00055 | 0.0124813 |
| NM_002951.3       | 6185              | RPN2          | 2508  | 95.2731   | 52.148   | 0.86946  | 0.00055 | 0.0124813 |
| NM_001080556.1    | 146845            | WDR16         | 1989  | 2.39422   | 16.0146  | -2.74175 | 0.00055 | 0.0124813 |
| NM_002049.3       | 2623              | GATA1         | 1480  | 1.96682   | 0.422505 | 2.21882  | 0.0006  | 0.013408  |
| NM_001195597.1    | 285733            | LOC285733     | 2513  | 0.59566   | 1.92067  | -1.68905 | 0.0006  | 0.013408  |
| NM_018699.2       | 11107             | PRDM5         | 2480  | 10.4146   | 20.0417  | -0.94440 | 0.0006  | 0.013408  |
| NM_006952.3       | 7348              | UPK1B         | 2058  | 22.9899   | 11.0677  | 1.05465  | 0.0006  | 0.013408  |
| NM_032283.2       | 84243             | ZDHHHC18      | 3139  | 8.09842   | 3.80949  | 1.08804  | 0.0006  | 0.013408  |
| NM_001079906.1    | 55422             | ZNF331        | 4131  | 21.6414   | 8.25556  | 1.39035  | 0.0006  | 0.013408  |
| NM_006982.2       | 8092              | ALX1          | 1294  | 1.59448   | 4.80268  | -1.59076 | 0.0006  | 0.013408  |
| NM_007257.5       | 10687             | PNMA2         | 4846  | 0.294481  | 0.957245 | -1.70072 | 0.0006  | 0.013408  |
| NM_175922.3       | 285800            | PRR18         | 2704  | 0.577218  | 2.00695  | -1.79782 | 0.0006  | 0.013408  |
| TCONS_00248440    | XLOC_020911       | -             | 5134  | 0.485107  | 1.73438  | -1.83804 | 0.0006  | 0.013408  |
| NM_000833.3       | 2903              | GRIN2A        | 14446 | 0.293903  | 1.61105  | -2.45459 | 0.0006  | 0.013408  |
| NM_021814.4       | 60481             | ELOVL5        | 3000  | 111.558   | 61.494   | 0.85928  | 0.0006  | 0.013408  |
| TCONS_00218085    | XLOC_019065       | -             | 2851  | 0.717565  | 2.29084  | -1.67469 | 0.0006  | 0.013408  |
| NM_001039492.2    | 2274              | FHL2          | 1521  | 32.9379   | 15.4451  | 1.09259  | 0.0006  | 0.013408  |
| NM_016531.5       | 51274             | KLF3          | 5615  | 44.8915   | 25.187   | 0.83377  | 0.0006  | 0.013408  |
| NM_007261.2       | 11314             | CD300A        | 1889  | 9.71124   | 4.33473  | 1.16371  | 0.0006  | 0.013408  |
| NM_080489.4       | 27111             | SDCBP2        | 1581  | 4.48281   | 1.00872  | 2.15187  | 0.0006  | 0.013408  |
| NM_012152.2       | 23566             | LPAR3         | 1721  | 7.94305   | 17.0084  | -1.09848 | 0.0006  | 0.013408  |
| NM_006120.3       | 3108              | HLA-DMA       | 1122  | 71.571    | 38.8935  | 0.87985  | 0.0006  | 0.013408  |
| TCONS_00062936    | XLOC_006061       | -             | 3825  | 1.08705   | 3.82407  | -1.81469 | 0.00065 | 0.0142695 |
| NM_001080522.2    | 57545             | CC2D2A        | 5240  | 11.7128   | 22.2435  | -0.92530 | 0.00065 | 0.0142695 |
| TCONS_00219771    | XLOC_019447       | -             | 819   | 0.388823  | 3.07789  | -2.98475 | 0.00065 | 0.0142695 |
| NM_020711.1       | 57471             | ERMN          | 3775  | 6.1896    | 2.49242  | 1.31230  | 0.00065 | 0.0142695 |
| NM_138774.3       | 91300             | C19orf22      | 1809  | 11.2593   | 5.18897  | 1.11760  | 0.00065 | 0.0142695 |
| TCONS_00180182    | XLOC_015712       | -             | 1504  | 0.352317  | 1.70663  | -2.27620 | 0.00065 | 0.0142695 |
| ENST00000439928.2 | ENSG00000228741.2 | RP11-309115.1 | 1721  | 0.959638  | 4.10629  | -2.09727 | 0.00065 | 0.0142695 |
| NM_153210.3       | 124739            | USP43         | 4069  | 1.77594   | 4.03754  | -1.18489 | 0.00065 | 0.0142695 |
| NM_002872.3       | 5880              | RAC2          | 1468  | 23.6746   | 11.4187  | 1.05195  | 0.00065 | 0.0142695 |
| TCONS_00233452    | XLOC_020497       | -             | 13060 | 2.7618    | 6.60497  | -1.25794 | 0.00065 | 0.0142695 |
| NM_007335.2       | 9940              | DLEC1         | 5614  | 3.98604   | 9.3766   | -1.23411 | 0.00065 | 0.0142695 |
| NM_020911.1       | 91584             | PLXNA4        | 13061 | 0.55838   | 1.29855  | -1.21758 | 0.00065 | 0.0142695 |
| NM_005022.2       | 5216              | PFN1          | 807   | 183.725   | 106.079  | 0.79241  | 0.00065 | 0.0142695 |
| NM_032108.3       | 10501             | SEMA6B        | 3942  | 3.40705   | 1.41654  | 1.26616  | 0.00065 | 0.0142695 |
| NM_003026.2       | 6456              | SH3GL2        | 2728  | 0.0779284 | 1.60812  | -4.36709 | 0.00065 | 0.0142695 |

|                |             |              |       |          |          |          |         |           |
|----------------|-------------|--------------|-------|----------|----------|----------|---------|-----------|
| NM_004277.4    | 9481        | SLC25A27     | 2986  | 4.92029  | 11.5652  | -1.23297 | 0.00065 | 0.0142695 |
| NM_058179.2    | 29968       | PSAT1        | 2188  | 4.43589  | 1.73563  | 1.35377  | 0.00065 | 0.0142695 |
| NM_023068.3    | 6614        | SIGLEC1      | 6720  | 3.42888  | 1.67939  | 1.02980  | 0.00065 | 0.0142695 |
| NM_001039580.1 | 79884       | MAP9         | 7333  | 9.03576  | 16.2149  | -0.84360 | 0.00065 | 0.0142695 |
| NM_006422.2    | 10566       | AKAP3        | 3020  | 0.423078 | 1.33146  | -1.65401 | 0.00065 | 0.0142695 |
| NM_001029858.3 | 222553      | SLC35F1      | 4852  | 0.30956  | 1.02805  | -1.73161 | 0.00065 | 0.0142695 |
| NM_004864.2    | 9518        | GDF15        | 1200  | 2.14643  | 0.431044 | 2.31603  | 0.0007  | 0.015106  |
| NM_006666.1    | 10856       | RUVBL2       | 1488  | 23.5467  | 42.3483  | -0.84678 | 0.0007  | 0.015106  |
| NM_000673.4    | 131         | ADH7         | 2289  | 76.0395  | 37.4903  | 1.02023  | 0.0007  | 0.015106  |
| NM_138468.4    | 130026      | ICA1L        | 7996  | 3.5873   | 6.77273  | -0.91684 | 0.0007  | 0.015106  |
| NM_024832.3    | 79890       | RIN3         | 3849  | 4.9286   | 2.26171  | 1.12376  | 0.0007  | 0.015106  |
| NM_005892.3    | 752         | FMNL1        | 3963  | 8.02866  | 3.74882  | 1.09872  | 0.0007  | 0.015106  |
| NM_001099407.1 | 55184       | C20orf12     | 3500  | 2.42389  | 5.16365  | -1.09107 | 0.0007  | 0.015106  |
| NM_014312.3    | 23584       | VSIG2        | 1121  | 12.0712  | 4.81151  | 1.32700  | 0.0007  | 0.015106  |
| NM_001042517.1 | 81624       | DIAPH3       | 4802  | 1.42367  | 0.455508 | 1.64407  | 0.0007  | 0.015106  |
| NM_000720.2    | 776         | CACNA1D      | 7768  | 3.50119  | 8.05376  | -1.20182 | 0.0007  | 0.015106  |
| NM_001142946.1 | 29125       | C11orf21     | 2262  | 4.95623  | 1.88486  | 1.39479  | 0.0007  | 0.015106  |
| NM_002090.2    | 2921        | CXCL3        | 1159  | 2.09477  | 0.313661 | 2.73951  | 0.0007  | 0.015106  |
| NM_021647.6    | 9848        | MFAP3L       | 6189  | 2.45327  | 5.02428  | -1.03421 | 0.0007  | 0.015106  |
| NM_002188.2    | 3596        | IL13         | 1282  | 5.26831  | 0.20073  | 4.71401  | 0.0007  | 0.015106  |
| NM_007054.5    | 11127       | KIF3A        | 6257  | 9.251    | 16.1645  | -0.80515 | 0.0007  | 0.015106  |
| NM_030643.3    | 80832       | APOL4        | 3415  | 3.41784  | 8.57044  | -1.32628 | 0.0007  | 0.015106  |
| TCONS_00122042 | XLOC_011173 | -            | 2395  | 0.614531 | 2.72025  | -2.14618 | 0.0007  | 0.015106  |
| NM_001100396.1 | 129852      | C2orf73      | 1921  | 1.18375  | 3.37732  | -1.51252 | 0.0007  | 0.015106  |
| NM_000929.2    | 5322        | PLA2G5       | 1894  | 0.164039 | 1.32441  | -3.01324 | 0.0007  | 0.015106  |
| NM_005158.4    | 27          | ABL2         | 11940 | 9.50476  | 4.34975  | 1.12772  | 0.0007  | 0.015106  |
| NM_018509.3    | 55379       | LRRC59       | 2915  | 36.5714  | 20.8116  | 0.81333  | 0.00075 | 0.0159498 |
| NM_014668.3    | 9687        | GREB1        | 8482  | 0.580229 | 1.36422  | -1.23338 | 0.00075 | 0.0159498 |
| NM_017681.2    | 54830       | NUP62CL      | 1762  | 1.52703  | 4.22254  | -1.46738 | 0.00075 | 0.0159498 |
| NM_005408.2    | 6357        | CCL13        | 851   | 168.111  | 0.321955 | 9.02834  | 0.00075 | 0.0159498 |
| NM_007351.2    | 22915       | MMRN1        | 4969  | 42.9437  | 21.1681  | 1.02055  | 0.00075 | 0.0159498 |
| NM_001008409.2 | 164395      | TTLL9        | 1607  | 1.22099  | 3.41669  | -1.48454 | 0.00075 | 0.0159498 |
| NM_020347.2    | 54585       | LZTFL1       | 3398  | 20.0918  | 34.8746  | -0.79557 | 0.00075 | 0.0159498 |
| NM_007107.3    | 6747        | SSR3         | 3716  | 86.4506  | 48.0381  | 0.84770  | 0.00075 | 0.0159498 |
| NM_016116.2    | 51666       | ASB4         | 3824  | 0.173897 | 0.794438 | -2.19170 | 0.00075 | 0.0159498 |
| NM_002298.4    | 3936        | LCP1         | 3790  | 105.542  | 54.3309  | 0.95798  | 0.00075 | 0.0159498 |
| NM_130897.1    | 83657       | DYNLRB2      | 497   | 8.03493  | 21.7803  | -1.43867 | 0.00075 | 0.0159498 |
| NM_001098814.1 | 6345        | SRL          | 4214  | 0.50721  | 1.45556  | -1.52092 | 0.00075 | 0.0159498 |
| NM_032512.2    | 57595       | PDZD4        | 3745  | 1.78328  | 4.0643   | -1.18847 | 0.00075 | 0.0159498 |
| TCONS_00081896 | XLOC_006697 | -            | 2735  | 0.908681 | 3.29391  | -1.85795 | 0.0008  | 0.0168217 |
| NM_173535.2    | 165530      | CLEC4F       | 2475  | 0.916906 | 2.46907  | -1.42912 | 0.0008  | 0.0168217 |
| NM_019016.2    | 192666      | KRT24        | 1881  | 1.6991   | 0.170365 | 3.31808  | 0.0008  | 0.0168217 |
| NM_198390.2    | 80790       | CMIP         | 4357  | 10.2118  | 5.58114  | 0.87160  | 0.0008  | 0.0168217 |
| NM_177455.3    | 168620      | BHLHA15      | 706   | 6.34898  | 1.9044   | 1.73719  | 0.0008  | 0.0168217 |
| NM_001178097.2 | 338809      | C12orf74     | 2369  | 2.06194  | 7.02269  | -1.76802 | 0.0008  | 0.0168217 |
| NM_001290.3    | 9079        | LDB2         | 2540  | 25.9535  | 54.161   | -1.06133 | 0.0008  | 0.0168217 |
| XM_002342862.3 | 100288562   | LOC100288562 | 2186  | 0.161353 | 1.39479  | -3.11175 | 0.0008  | 0.0168217 |
| NM_025087.2    | 80157       | CWH43        | 2471  | 0.184127 | 1.16896  | -2.66645 | 0.0008  | 0.0168217 |
| NM_152862.1    | 10109       | ARPC2        | 1448  | 177.541  | 102.67   | 0.79013  | 0.0008  | 0.0168217 |
| NM_014800.10   | 9844        | ELMO1        | 5180  | 9.37102  | 3.99007  | 1.23179  | 0.0008  | 0.0168217 |
| NM_004212.3    | 9153        | SLC28A2      | 2463  | 0.114975 | 0.82683  | -2.84628 | 0.00085 | 0.0176689 |
| NM_030632.1    | 80816       | ASXL3        | 7642  | 0.896831 | 1.97286  | -1.13738 | 0.00085 | 0.0176689 |
| NM_138288.3    | 171546      | C14orf147    | 2534  | 28.4448  | 15.8157  | 0.84681  | 0.00085 | 0.0176689 |
| NM_012264.4    | 25829       | TMEM184B     | 3611  | 7.47307  | 3.58356  | 1.06031  | 0.00085 | 0.0176689 |

|                |             |           |       |          |          |          |         |           |
|----------------|-------------|-----------|-------|----------|----------|----------|---------|-----------|
| XM_001726961.3 | 388523      | ZNF728    | 2654  | 0.257463 | 1.24208  | -2.27032 | 0.00085 | 0.0176689 |
| NM_020813.2    | 57573       | ZNF471    | 4967  | 4.51928  | 8.26025  | -0.87009 | 0.00085 | 0.0176689 |
| NM_000918.3    | 5034        | P4HB      | 2578  | 112.846  | 63.2556  | 0.83509  | 0.00085 | 0.0176689 |
| NM_001764.2    | 910         | CD1B      | 1396  | 2.09678  | 0.468873 | 2.16090  | 0.00085 | 0.0176689 |
| NM_014750.4    | 9787        | DLGAP5    | 2993  | 3.6814   | 1.18664  | 1.63337  | 0.00085 | 0.0176689 |
| NM_021637.2    | 59353       | TMEM35    | 2071  | 0.797866 | 2.43547  | -1.60998 | 0.00085 | 0.0176689 |
| NM_005719.2    | 10094       | ARPC3     | 884   | 240.933  | 137.249  | 0.81184  | 0.00085 | 0.0176689 |
| NM_002417.4    | 4288        | MKI67     | 12497 | 3.27975  | 1.27328  | 1.36504  | 0.00085 | 0.0176689 |
| NM_001013698.2 | 440087      | C12orf69  | 2104  | 0.812945 | 3.42741  | -2.07589 | 0.00085 | 0.0176689 |
| NM_138392.3    | 92799       | SHKBP1    | 2365  | 7.78312  | 3.49923  | 1.15331  | 0.0009  | 0.0184743 |
| NM_024532.3    | 79582       | SPAG16    | 2174  | 5.70617  | 17.0394  | -1.57828 | 0.0009  | 0.0184743 |
| NM_004967.3    | 3381        | IBSP      | 1591  | 0.127051 | 22.5586  | -7.47213 | 0.0009  | 0.0184743 |
| NM_013390.2    | 23670       | TMEM2     | 6523  | 40.7194  | 22.4702  | 0.85770  | 0.0009  | 0.0184743 |
| NM_004336.3    | 699         | BUB1      | 3502  | 4.36725  | 1.89247  | 1.20645  | 0.0009  | 0.0184743 |
| TCONS_00002457 | XLOC_001928 | -         | 2829  | 1.06488  | 2.8882   | -1.43948 | 0.0009  | 0.0184743 |
| NM_138812.2    | 143241      | DYDC1     | 750   | 3.545    | 11.2753  | -1.66931 | 0.0009  | 0.0184743 |
| NM_184041.1    | 226         | ALDOA     | 1523  | 157.545  | 81.3694  | 0.95321  | 0.0009  | 0.0184743 |
| NM_182832.2    | 191585      | PLAC4     | 10009 | 9.24676  | 3.55949  | 1.37728  | 0.0009  | 0.0184743 |
| NM_052953.2    | 116135      | LRRC3B    | 1693  | 0.521277 | 1.76688  | -1.76108 | 0.0009  | 0.0184743 |
| NM_003629.3    | 8503        | PIK3R3    | 5675  | 35.7586  | 19.6031  | 0.86721  | 0.0009  | 0.0184743 |
| NM_152721.5    | 220164      | DOK6      | 8897  | 4.35317  | 2.37748  | 0.87263  | 0.0009  | 0.0184743 |
| NM_139244.4    | 134957      | STXBP5    | 9244  | 20.2077  | 10.5717  | 0.93470  | 0.0009  | 0.0184743 |
| TCONS_00117328 | XLOC_009816 | -         | 4752  | 1.6332   | 0.597648 | 1.45033  | 0.0009  | 0.0184743 |
| NM_014339.5    | 23765       | IL17RA    | 8606  | 8.94948  | 5.14456  | 0.79876  | 0.0009  | 0.0184743 |
| NM_002304.2    | 3955        | LFNG      | 2058  | 9.81878  | 2.53406  | 1.95409  | 0.00095 | 0.0192772 |
| NM_005625.3    | 6386        | SDCBP     | 2167  | 94.7742  | 54.9317  | 1.04662  | 0.00095 | 0.0192772 |
| NM_004701.3    | 9133        | CCNB2     | 1549  | 4.77723  | 1.76062  | 1.44009  | 0.00095 | 0.0192772 |
| NM_002965.3    | 6280        | S100A9    | 577   | 31.6324  | 11.6548  | 1.44047  | 0.00095 | 0.0192772 |
| NM_001178003.1 | 144406      | WDR66     | 3455  | 5.79694  | 19.4299  | -1.74492 | 0.00095 | 0.0192772 |
| NM_080792.2    | 140885      | SIRPA     | 3868  | 13.0512  | 5.65389  | 1.20686  | 0.00095 | 0.0192772 |
| NM_032832.5    | 84918       | LRP11     | 3618  | 31.939   | 55.513   | -0.79751 | 0.00095 | 0.0192772 |
| TCONS_00284457 | XLOC_023884 | -         | 3090  | 0.541864 | 1.71419  | -1.66152 | 0.00095 | 0.0192772 |
| NM_032991.2    | 836         | CASP3     | 2506  | 38.8253  | 19.9246  | 0.96244  | 0.00095 | 0.0192772 |
| NM_003960.3    | 9027        | NAT8      | 1073  | 0.556262 | 2.59098  | -2.21966 | 0.00095 | 0.0192772 |
| NM_138554.3    | 7099        | TLR4      | 5653  | 27.102   | 15.526   | 0.80372  | 0.00095 | 0.0192772 |
| NM_004840.2    | 9459        | ARHGEF6   | 5272  | 36.69    | 21.3491  | 0.78121  | 0.00095 | 0.0192772 |
| TCONS_00210161 | XLOC_018180 | -         | 5561  | 2.33849  | 4.9003   | -1.06729 | 0.00095 | 0.0192772 |
| NM_003120.2    | 6688        | SPI1      | 1405  | 9.41908  | 3.28303  | 1.52056  | 0.00095 | 0.0192772 |
| NM_032229.2    | 84189       | SLITRK6   | 4181  | 14.7531  | 8.15912  | 0.85453  | 0.00095 | 0.0192772 |
| NM_013402.4    | 3992        | FADS1     | 4420  | 13.798   | 7.75481  | 0.83130  | 0.00095 | 0.0192772 |
| NM_152547.4    | 153579      | BTNL9     | 3500  | 2.02779  | 4.53135  | -1.16003 | 0.00095 | 0.0192772 |
| NM_053001.2    | 116039      | OSR2      | 1791  | 5.72828  | 1.68348  | 1.76665  | 0.00095 | 0.0192772 |
| NM_207417.1    | 389799      | C9orf171  | 1789  | 0.851208 | 2.81522  | -1.72567 | 0.001   | 0.0199964 |
| NM_144616.3    | 126306      | JSRP1     | 1145  | 4.94652  | 1.56697  | 1.65843  | 0.001   | 0.0199964 |
| NM_003511.2    | 8332        | HIST1H2AL | 470   | 24.9788  | 8.03838  | 1.63573  | 0.001   | 0.0199964 |
| NM_002729.4    | 3087        | HHEX      | 1759  | 8.89039  | 3.97839  | 1.16006  | 0.001   | 0.0199964 |
| NM_006082.2    | 10376       | TUBA1B    | 1753  | 145.728  | 84.1687  | 0.79192  | 0.001   | 0.0199964 |
| NM_001013626.2 | 286187      | LRRC67    | 1084  | 2.01251  | 5.87536  | -1.54568 | 0.001   | 0.0199964 |
| NM_001198543.1 | 54768       | HYDIN     | 3122  | 3.02855  | 14.7955  | -2.28846 | 0.001   | 0.0199964 |
| NM_152558.3    | 23288       | IQCE      | 6844  | 4.35995  | 8.11865  | -0.89693 | 0.001   | 0.0199964 |
| NM_021214.1    | 58489       | FAM108C1  | 2360  | 15.6146  | 8.24272  | 0.92170  | 0.001   | 0.0199964 |
| NM_182609.2    | 342926      | ZNF677    | 3493  | 2.18207  | 4.82351  | -1.14439 | 0.001   | 0.0199964 |
| NM_002924.4    | 6000        | RGS7      | 2440  | 2.90624  | 0.998181 | 1.54178  | 0.001   | 0.0199964 |
| NM_001191321.1 | 2562        | GABRB3    | 5543  | 0.299375 | 1.50565  | -2.33036 | 0.001   | 0.0199964 |

|                |             |           |      |          |          |          |         |           |
|----------------|-------------|-----------|------|----------|----------|----------|---------|-----------|
| NM_025212.1    | 80319       | CXXC4     | 761  | 1.02113  | 4.13327  | -2.01711 | 0.001   | 0.0199964 |
| NM_025079.2    | 80149       | ZC3H12A   | 2716 | 5.504    | 2.36571  | 1.21821  | 0.001   | 0.0199964 |
| NM_015292.2    | 23344       | ESYT1     | 4247 | 24.8403  | 11.9394  | 1.05696  | 0.001   | 0.0199964 |
| NM_018058.5    | 55118       | CRTAC1    | 2713 | 0.154487 | 2.46175  | -3.99413 | 0.001   | 0.0199964 |
| NM_006808.2    | 10952       | SEC61B    | 562  | 79.7751  | 41.3159  | 0.94924  | 0.001   | 0.0199964 |
| NM_000348.3    | 6716        | SRD5A2    | 2445 | 4.02154  | 8.70016  | -1.11330 | 0.001   | 0.0199964 |
| NM_025258.2    | 80737       | C6orf27   | 2914 | 0.893045 | 2.3035   | -1.36702 | 0.00105 | 0.0207193 |
| NM_138573.3    | 145957      | NRG4      | 2195 | 1.95516  | 4.81632  | -1.30065 | 0.00105 | 0.0207193 |
| NM_001129908.2 | 729085      | FAM198A   | 3433 | 1.63022  | 3.76574  | -1.20787 | 0.00105 | 0.0207193 |
| TCONS_00211775 | XLOC_017242 | -         | 3766 | 0.750793 | 3.44735  | -2.19900 | 0.00105 | 0.0207193 |
| NM_007178.3    | 11171       | STRAP     | 1907 | 35.8347  | 20.2932  | 0.82036  | 0.00105 | 0.0207193 |
| NM_000405.4    | 2760        | GM2A      | 3690 | 33.4896  | 19.6752  | 0.76733  | 0.00105 | 0.0207193 |
| NM_032930.2    | 85016       | C11orf70  | 2198 | 8.8689   | 17.1715  | -0.95319 | 0.00105 | 0.0207193 |
| NM_000231.2    | 6445        | SGCG      | 1655 | 0.160525 | 1.60134  | -3.31841 | 0.00105 | 0.0207193 |
| NM_001178088.1 | 8871        | SYNJ2     | 7332 | 4.77869  | 1.83901  | 1.37768  | 0.00105 | 0.0207193 |
| NM_003355.2    | 7351        | UCP2      | 1646 | 17.3081  | 8.42733  | 1.03830  | 0.00105 | 0.0207193 |
| NM_138788.3    | 120224      | TMEM45B   | 2207 | 7.38134  | 14.4108  | -0.96519 | 0.00105 | 0.0207193 |
| NM_001123396.1 | 729230      | CCR2      | 2335 | 18.7917  | 8.4493   | 1.15320  | 0.00105 | 0.0207193 |
| NM_139172.1    | 147744      | TMEM190   | 593  | 16.509   | 37.1796  | -1.17126 | 0.00105 | 0.0207193 |
| NM_025239.3    | 80380       | PDCD1LG2  | 2418 | 14.0206  | 7.43164  | 0.91580  | 0.00105 | 0.0207193 |
| NM_014584.1    | 30001       | ERO1L     | 3310 | 49.0854  | 28.498   | 0.78443  | 0.00105 | 0.0207193 |
| NM_020239.3    | 56882       | CDC42SE1  | 3047 | 51.1608  | 27.5194  | 0.89459  | 0.00105 | 0.0207193 |
| NM_003244.2    | 7050        | GIF1      | 1606 | 23.8996  | 9.31239  | 1.35976  | 0.00105 | 0.0207193 |
| NM_000499.3    | 1543        | CYP1A1    | 2608 | 0.804333 | 0.177293 | 2.18166  | 0.00105 | 0.0207193 |
| NM_207401.1    | 388759      | C1orf229  | 2258 | 0.391259 | 1.48368  | -1.92299 | 0.00105 | 0.0207193 |
| NM_004728.2    | 9188        | DDX21     | 4153 | 48.717   | 28.2103  | 0.78820  | 0.00105 | 0.0207193 |
| NM_019858.1    | 27239       | GPR162    | 2516 | 1.14178  | 3.68162  | -1.68906 | 0.00105 | 0.0207193 |
| NM_022162.1    | 64127       | NOD2      | 4485 | 3.87105  | 1.81943  | 1.08923  | 0.00105 | 0.0207193 |
| TCONS_00027175 | XLOC_001231 | -         | 1229 | 0.734807 | 2.98263  | -2.02115 | 0.00105 | 0.0207193 |
| NM_001127496.1 | 81848       | SPRY4     | 4941 | 4.25907  | 2.07851  | 1.03499  | 0.00105 | 0.0207193 |
| NM_001079911.2 | 1758        | DMP1      | 2639 | 0.103842 | 0.806231 | -2.95680 | 0.0011  | 0.0214605 |
| NM_032623.3    | 84709       | C4orf49   | 1339 | 28.92    | 15.7078  | 0.88059  | 0.0011  | 0.0214605 |
| NM_003051.3    | 6566        | SLC16A1   | 3910 | 12.3099  | 6.45505  | 0.93132  | 0.0011  | 0.0214605 |
| NM_020768.3    | 57528       | KCTD16    | 5183 | 0.477178 | 1.27439  | -1.41721 | 0.0011  | 0.0214605 |
| NM_032800.2    | 84886       | C1orf198  | 3761 | 21.5597  | 12.159   | 0.82631  | 0.0011  | 0.0214605 |
| NM_020203.3    | 56955       | MEPE      | 2007 | 0.36773  | 1.66713  | -2.18065 | 0.0011  | 0.0214605 |
| NM_006196.3    | 5093        | PCBP1     | 1751 | 42.3965  | 24.2548  | 0.80567  | 0.0011  | 0.0214605 |
| NM_001040274.2 | 221711      | SYCP2L    | 3130 | 2.2879   | 0.876352 | 1.38444  | 0.0011  | 0.0214605 |
| NM_004237.3    | 9319        | TRIP13    | 2390 | 4.01102  | 8.50262  | -1.08394 | 0.0011  | 0.0214605 |
| NM_000198.3    | 3284        | HSD3B2    | 1710 | 1.798    | 0.437997 | 2.03740  | 0.0011  | 0.0214605 |
| NM_001085384.1 | 7710        | ZNF154    | 2747 | 5.11825  | 10.2001  | -0.99486 | 0.0011  | 0.0214605 |
| NM_003841.3    | 8794        | TNFRSF10C | 1494 | 4.32694  | 1.58315  | 1.45054  | 0.0011  | 0.0214605 |
| NM_001198689.1 | 3953        | LEPR      | 5100 | 13.3861  | 64.7144  | -2.27335 | 0.0011  | 0.0214605 |
| NM_004931.4    | 926         | CD8B      | 1433 | 3.90112  | 10.5375  | -1.43358 | 0.0011  | 0.0214605 |
| NM_005576.2    | 4016        | LOXL1     | 2361 | 13.1862  | 6.55089  | 1.00927  | 0.0011  | 0.0214605 |
| NM_199139.1    | 54739       | XAF1      | 3569 | 7.4952   | 17.848   | -1.25173 | 0.0011  | 0.0214605 |
| NM_019073.2    | 54558       | SPATA6    | 5004 | 8.28265  | 14.7221  | -0.82982 | 0.00115 | 0.0222874 |
| NM_001001852.3 | 415116      | PIM3      | 2379 | 16.9792  | 9.37923  | 0.85623  | 0.00115 | 0.0222874 |
| NM_016293.2    | 51411       | BIN2      | 2211 | 22.592   | 12.0695  | 0.90444  | 0.00115 | 0.0222874 |
| NM_030949.2    | 81706       | PPP1R14C  | 2211 | 4.56089  | 9.55784  | -1.06737 | 0.00115 | 0.0222874 |
| NM_182482.2    | 85319       | BAGE2     | 1567 | 0.233075 | 1.45099  | -2.63817 | 0.00115 | 0.0222874 |
| NM_002436.3    | 4354        | MPP1      | 2048 | 20.3714  | 10.7929  | 0.91647  | 0.00115 | 0.0222874 |
| NM_001001548.2 | 948         | CD36      | 4727 | 14.2394  | 6.62186  | 1.10458  | 0.00115 | 0.0222874 |
| NM_032679.2    | 84765       | ZNF577    | 3096 | 6.02419  | 11.5661  | -0.94106 | 0.00115 | 0.0222874 |



|                |             |          |       |          |          |          |         |           |
|----------------|-------------|----------|-------|----------|----------|----------|---------|-----------|
| NM_007210.3    | 11226       | GALNT6   | 4520  | 6.91363  | 3.5889   | 0.94590  | 0.00115 | 0.0222874 |
| NM_014326.3    | 23604       | DAPK2    | 2628  | 6.63162  | 3.15749  | 1.07058  | 0.00115 | 0.0222874 |
| NM_006914.3    | 6096        | RORB     | 3604  | 6.01489  | 11.2635  | -0.90505 | 0.00115 | 0.0222874 |
| NM_000029.3    | 183         | AGT      | 2584  | 0.585887 | 1.81263  | -1.62939 | 0.0012  | 0.0230244 |
| NM_001135733.1 | 94241       | TP53INP1 | 5652  | 49.9421  | 23.9929  | 1.05765  | 0.0012  | 0.0230244 |
| NM_006418.4    | 10562       | OLFM4    | 2919  | 0.254717 | 0.940112 | -1.88394 | 0.0012  | 0.0230244 |
| TCONS_00205099 | XLOC_017564 | -        | 3514  | 0.949288 | 0.289363 | 1.71396  | 0.0012  | 0.0230244 |
| NM_001005474.2 | 64332       | NFKBIZ   | 3793  | 17.8273  | 3.50004  | 2.34864  | 0.0012  | 0.0230244 |
| NM_173798.2    | 170261      | ZCCHC12  | 2197  | 0.185213 | 0.951334 | -2.36077 | 0.0012  | 0.0230244 |
| NM_001137560.1 | 441151      | TMEM151B | 4619  | 0.219879 | 0.786607 | -1.83893 | 0.0012  | 0.0230244 |
| NM_031916.4    | 83853       | ROPN1L   | 1078  | 8.69182  | 21.6893  | -1.31925 | 0.0012  | 0.0230244 |
| NM_016307.3    | 51450       | PRRX2    | 1311  | 13.268   | 6.00684  | 1.14327  | 0.0012  | 0.0230244 |
| NM_005572.3    | 4000        | LMNA     | 2070  | 58.7804  | 24.2547  | 1.27707  | 0.0012  | 0.0230244 |
| NM_000379.3    | 7498        | XDH      | 5717  | 3.00296  | 1.36851  | 1.13378  | 0.0012  | 0.0230244 |
| NM_003408.1    | 7539        | ZFP37    | 2752  | 3.1667   | 6.50761  | -1.03915 | 0.0012  | 0.0230244 |
| NM_001130040.1 | 6464        | SHC1     | 3481  | 19.821   | 7.34791  | 1.43162  | 0.0012  | 0.0230244 |
| NM_004747.3    | 9231        | DLG5     | 7479  | 17.2647  | 10.0866  | 0.77539  | 0.0012  | 0.0230244 |
| NM_004378.2    | 1381        | CRABP1   | 772   | 19.3238  | 8.18441  | 1.23943  | 0.00125 | 0.02372   |
| NM_001416.3    | 1973        | EIF4A1   | 1877  | 213.323  | 119.451  | 0.83662  | 0.00125 | 0.02372   |
| NM_002970.2    | 6303        | SAT1     | 1064  | 534.363  | 294.105  | 0.86149  | 0.00125 | 0.02372   |
| NM_016343.3    | 1063        | CENPF    | 10296 | 7.71716  | 4.15555  | 0.89303  | 0.00125 | 0.02372   |
| NM_005079.2    | 7163        | TPD52    | 3961  | 27.0348  | 14.9664  | 0.85309  | 0.00125 | 0.02372   |
| NM_001145848.1 | 8842        | PROM1    | 3973  | 41.6027  | 81.0101  | -0.96143 | 0.00125 | 0.02372   |
| NM_001082537.2 | 79600       | TCTN1    | 2009  | 9.31389  | 26.3227  | -1.49885 | 0.00125 | 0.02372   |
| NM_001100917.1 | 144448      | TSPAN19  | 1020  | 6.99581  | 15.5608  | -1.15335 | 0.00125 | 0.02372   |
| NM_000391.3    | 1200        | TPP1     | 3533  | 17.19    | 9.6488   | 0.83315  | 0.00125 | 0.02372   |
| NM_012325.2    | 22919       | MAPRE1   | 2623  | 65.122   | 39.1144  | 0.73545  | 0.00125 | 0.02372   |
| NM_016447.2    | 51678       | MPP6     | 2187  | 26.9018  | 47.1138  | -0.80845 | 0.00125 | 0.02372   |
| NM_012112.4    | 22974       | TPX2     | 3662  | 4.74981  | 2.11557  | 1.16682  | 0.00125 | 0.02372   |
| NM_002030.3    | 2359        | FPR3     | 2517  | 24.1341  | 13.4726  | 0.84104  | 0.00125 | 0.02372   |
| NM_130810.3    | 161582      | DYX1C1   | 1993  | 4.95038  | 13.4104  | -1.43774 | 0.00125 | 0.02372   |
| NM_003793.3    | 8722        | CTSF     | 2014  | 19.3251  | 34.152   | -0.82150 | 0.00125 | 0.02372   |
| TCONS_00197271 | XLOC_018278 | -        | 10260 | 0.79106  | 2.64333  | -1.74050 | 0.00125 | 0.02372   |
| NM_001171626.1 | 7422        | VEGFA    | 3539  | 17.2245  | 3.5456   | 2.28036  | 0.00125 | 0.02372   |
| NM_006745.3    | 6307        | SC4MOL   | 2139  | 34.7417  | 19.17    | 0.85782  | 0.00125 | 0.02372   |
| NM_003329.2    | 7295        | TXN      | 508   | 366.501  | 206.195  | 0.82981  | 0.00125 | 0.02372   |
| NM_178172.3    | 338328      | GPIHBP1  | 2281  | 1.90679  | 4.58965  | -1.26724 | 0.0013  | 0.0244278 |
| NM_007244.2    | 11272       | PRR4     | 564   | 10.6538  | 3.11021  | 1.77628  | 0.0013  | 0.0244278 |
| NM_022834.4    | 64856       | VWA1     | 4659  | 5.77136  | 2.96648  | 0.96016  | 0.0013  | 0.0244278 |
| TCONS_00268119 | XLOC_023343 | -        | 1486  | 2.06149  | 5.3775   | -1.38325 | 0.0013  | 0.0244278 |
| NM_080657.4    | 91543       | RSAD2    | 3512  | 4.52626  | 8.50485  | -0.90997 | 0.0013  | 0.0244278 |
| NM_005212.2    | 1448        | CSN3     | 808   | 5.49987  | 0.356717 | 3.94655  | 0.0013  | 0.0244278 |
| NM_182920.1    | 56999       | ADAMTS9  | 7313  | 20.4174  | 11.7794  | 0.79353  | 0.0013  | 0.0244278 |
| NM_006010.4    | 7873        | MANF     | 939   | 54.7061  | 30.5012  | 0.84283  | 0.0013  | 0.0244278 |
| NM_006755.1    | 6888        | TALDO1   | 1243  | 81.0379  | 47.1825  | 0.78035  | 0.0013  | 0.0244278 |
| NM_178554.4    | 339855      | KY       | 5704  | 0.338184 | 0.912367 | -1.43181 | 0.0013  | 0.0244278 |
| TCONS_00267222 | XLOC_022300 | -        | 703   | 2.82386  | 14.9632  | -2.40568 | 0.0013  | 0.0244278 |
| NM_005475.2    | 10019       | SH2B3    | 5406  | 14.2339  | 8.13118  | 0.80780  | 0.0013  | 0.0244278 |
| NM_020356.3    | 57091       | CASS4    | 3155  | 3.3797   | 1.31025  | 1.36706  | 0.0013  | 0.0244278 |
| NM_012342.2    | 25805       | BAMBI    | 1724  | 10.9842  | 20.6423  | -0.91017 | 0.00135 | 0.0250595 |
| NM_012474.4    | 7371        | UCK2     | 4920  | 8.93271  | 5.06019  | 0.81991  | 0.00135 | 0.0250595 |
| TCONS_00313672 | XLOC_026080 | -        | 1850  | 3.89835  | 8.62815  | -1.14619 | 0.00135 | 0.0250595 |
| NM_006259.1    | 5593        | PRKG2    | 3328  | 0.535246 | 1.65502  | -1.62857 | 0.00135 | 0.0250595 |
| NM_020412.4    | 57132       | CHMP1B   | 3060  | 54.351   | 28.633   | 0.92463  | 0.00135 | 0.0250595 |

|                   |                   |              |      |          |          |          |         |           |
|-------------------|-------------------|--------------|------|----------|----------|----------|---------|-----------|
| NM_006219.1       | 5291              | PIK3CB       | 3213 | 23.6889  | 13.9102  | 0.76807  | 0.00135 | 0.0250595 |
| NM_001873.2       | 1363              | CPE          | 2428 | 288.969  | 147.827  | 0.96700  | 0.00135 | 0.0250595 |
| NM_018639.3       | 55884             | WSB2         | 2822 | 27.2912  | 15.9357  | 0.77617  | 0.00135 | 0.0250595 |
| NM_019111.4       | 3122              | HLA-DRA      | 1280 | 1019.83  | 472.152  | 1.11100  | 0.00135 | 0.0250595 |
| XM_003118995.1    | 100506191         | LOC100506191 | 2525 | 3.66721  | 7.73331  | -1.07641 | 0.00135 | 0.0250595 |
| TCONS_00254409    | XLOC_022134       | -            | 2813 | 0.184067 | 1.0749   | -2.54590 | 0.00135 | 0.0250595 |
| NM_003270.2       | 7105              | TSPAN6       | 2069 | 39.2457  | 67.0703  | -0.77314 | 0.00135 | 0.0250595 |
| NM_145239.2       | 112476            | PRRT2        | 2567 | 1.63494  | 3.78784  | -1.21214 | 0.00135 | 0.0250595 |
| NM_032802.3       | 84888             | SPPL2A       | 2010 | 48.3474  | 28.7016  | 0.75231  | 0.00135 | 0.0250595 |
| NM_015236.4       | 23284             | LPHN3        | 6125 | 8.42316  | 14.4939  | -0.78301 | 0.00135 | 0.0250595 |
| XM_003118524.1    | 389197            | C4orf50      | 3184 | 0.540962 | 1.56884  | -1.53610 | 0.00135 | 0.0250595 |
| TCONS_00225715    | XLOC_019189       | -            | 4994 | 1.22989  | 0.1855   | 2.72904  | 0.0014  | 0.0257815 |
| NM_033375.4       | 4641              | MYO1C        | 4736 | 13.4527  | 5.69537  | 1.24004  | 0.0014  | 0.0257815 |
| NM_001037329.3    | 1262              | CNGA4        | 1911 | 1.51634  | 4.09179  | -1.43213 | 0.0014  | 0.0257815 |
| NM_004465.1       | 2255              | FGF10        | 627  | 5.66094  | 15.1383  | -1.41908 | 0.0014  | 0.0257815 |
| NM_144999.2       | 201255            | LRRC45       | 2599 | 3.52746  | 7.20279  | -1.02993 | 0.0014  | 0.0257815 |
| TCONS_00227078    | XLOC_018699       | -            | 2007 | 1.51764  | 6.24138  | -2.04003 | 0.0014  | 0.0257815 |
| NM_000476.2       | 203               | AK1          | 2266 | 4.68506  | 9.31414  | -0.99136 | 0.0014  | 0.0257815 |
| TCONS_00048192    | XLOC_004688       | -            | 4458 | 0.382839 | 1.3063   | -1.77068 | 0.0014  | 0.0257815 |
| NM_003186.3       | 6876              | TAGLN        | 1160 | 344.277  | 189.93   | 0.85811  | 0.0014  | 0.0257815 |
| NM_181644.4       | 148808            | MFSD4        | 4088 | 8.48492  | 4.50309  | 0.91399  | 0.0014  | 0.0257815 |
| NM_003888.3       | 8854              | ALDH1A2      | 3603 | 25.1261  | 47.9487  | -0.93231 | 0.0014  | 0.0257815 |
| NM_020741.2       | 57501             | KIAA1257     | 1715 | 1.40731  | 3.6688   | -1.38237 | 0.0014  | 0.0257815 |
| NM_003862.2       | 8817              | FGF18        | 1982 | 0.296395 | 1.22981  | -2.05284 | 0.0014  | 0.0257815 |
| NM_004434.2       | 2009              | EML1         | 4465 | 7.01777  | 12.3336  | -0.81351 | 0.00145 | 0.0264203 |
| NM_002381.4       | 4148              | MATN3        | 2583 | 3.62209  | 7.7199   | -1.09176 | 0.00145 | 0.0264203 |
| NM_013358.2       | 29943             | PADI1        | 3847 | 2.10339  | 0.842389 | 1.32016  | 0.00145 | 0.0264203 |
| NM_006033.2       | 9388              | LIPG         | 4141 | 0.922035 | 0.292751 | 1.65515  | 0.00145 | 0.0264203 |
| NM_145056.2       | 147906            | DACT3        | 2834 | 1.85159  | 4.27064  | -1.20569 | 0.00145 | 0.0264203 |
| NM_017723.2       | 54863             | C9orf167     | 4069 | 3.17954  | 1.47826  | 1.10491  | 0.00145 | 0.0264203 |
| TCONS_00001771    | XLOC_001339       | -            | 1501 | 0.282988 | 1.46284  | -2.36996 | 0.00145 | 0.0264203 |
| NM_000346.3       | 6662              | SOX9         | 3935 | 10.6744  | 5.91297  | 0.85220  | 0.00145 | 0.0264203 |
| NM_003258.4       | 7083              | TK1          | 1595 | 2.67105  | 0.762101 | 1.80935  | 0.00145 | 0.0264203 |
| NM_006555.3       | 10652             | YKT6         | 2766 | 21.526   | 12.3181  | 0.80530  | 0.00145 | 0.0264203 |
| NM_001112718.1    | 22998             | LIMCH1       | 6084 | 12.8545  | 24.3684  | -0.92274 | 0.00145 | 0.0264203 |
| NM_004227.3       | 9265              | CYTH3        | 4469 | 14.1338  | 23.9407  | -0.76032 | 0.00145 | 0.0264203 |
| NM_005722.3       | 10097             | ACTR2        | 3919 | 145.837  | 80.3251  | 0.86043  | 0.00145 | 0.0264203 |
| NM_012319.3       | 25800             | SLC39A6      | 3620 | 83.6459  | 49.1667  | 0.76661  | 0.00145 | 0.0264203 |
| NM_003749.2       | 8660              | IRS2         | 6998 | 7.63997  | 4.34961  | 0.81268  | 0.00145 | 0.0264203 |
| NM_013364.4       | 29944             | PNMA3        | 3751 | 0.485639 | 1.30797  | -1.42938 | 0.00145 | 0.0264203 |
| NM_024940.6       | 80005             | DOCK5        | 7555 | 15.4059  | 9.03818  | 0.76938  | 0.00145 | 0.0264203 |
| TCONS_00196029    | XLOC_017238       | -            | 2296 | 0.508796 | 1.62119  | -1.67190 | 0.00145 | 0.0264203 |
| NM_014790.3       | 9832              | JAKMIP2      | 3338 | 1.1803   | 2.87059  | -1.28219 | 0.00145 | 0.0264203 |
| NM_030627.2       | 80315             | CPEB4        | 7769 | 29.6778  | 17.4491  | 0.76624  | 0.0015  | 0.0270821 |
| NM_021958.3       | 3142              | HLX          | 2279 | 4.13149  | 1.7535   | 1.23643  | 0.0015  | 0.0270821 |
| NM_145053.4       | 143630            | UBQLNL       | 2334 | 0.510909 | 1.53987  | -1.59167 | 0.0015  | 0.0270821 |
| NM_000554.4       | 1406              | CRX          | 4467 | 0.399264 | 1.12068  | -1.48897 | 0.0015  | 0.0270821 |
| NM_182538.4       | 201305            | SPNS3        | 1893 | 2.90269  | 0.845872 | 1.77888  | 0.0015  | 0.0270821 |
| NM_001125.2       | 141               | ADPRH        | 3439 | 6.72959  | 3.35311  | 1.00502  | 0.0015  | 0.0270821 |
| NM_153612.3       | 222537            | HS3ST5       | 2744 | 0.212564 | 0.783482 | -1.88201 | 0.0015  | 0.0270821 |
| NM_017436.4       | 53947             | A4GALT       | 2092 | 19.1131  | 10.4289  | 0.87398  | 0.0015  | 0.0270821 |
| NM_153208.1       | 124152            | IQCK         | 2554 | 12.0965  | 24.4537  | -1.01546 | 0.0015  | 0.0270821 |
| NM_000371.3       | 7276              | TTR          | 929  | 2.86045  | 0.748366 | 1.93442  | 0.0015  | 0.0270821 |
| ENST00000514532.2 | ENSG00000248587.2 | GDNF-AS1     | 2913 | 1.95066  | 0.577972 | 1.75489  | 0.0015  | 0.0270821 |

|                |             |           |       |          |          |          |         |           |
|----------------|-------------|-----------|-------|----------|----------|----------|---------|-----------|
| NM_005409.4    | 6373        | CXCL11    | 1606  | 1.36176  | 6.67678  | -2.29368 | 0.0015  | 0.0270821 |
| NM_198481.3    | 284415      | VSTM1     | 1023  | 9.22641  | 0.210054 | 5.45693  | 0.0015  | 0.0270821 |
| NM_178033.1    | 260293      | CYP4X1    | 2357  | 8.23848  | 14.88    | -0.85292 | 0.0015  | 0.0270821 |
| TCONS_00268841 | XLOC_022907 | -         | 1765  | 0.46488  | 1.6536   | -1.83068 | 0.0015  | 0.0270821 |
| NM_024809.3    | 79867       | TCTN2     | 2910  | 5.83943  | 12.4415  | -1.09126 | 0.0015  | 0.0270821 |
| NM_001005163.2 | 390066      | OR52D1    | 1065  | 0.485358 | 2.23353  | -2.20220 | 0.00155 | 0.0278206 |
| NM_004836.5    | 9451        | EIF2AK3   | 4648  | 32.2178  | 19.1087  | 0.75363  | 0.00155 | 0.0278206 |
| NM_000377.2    | 7454        | WAS       | 1831  | 7.30363  | 3.26251  | 1.16263  | 0.00155 | 0.0278206 |
| NM_001547.4    | 3433        | IFIT2     | 3495  | 9.62328  | 16.7428  | -0.79894 | 0.00155 | 0.0278206 |
| TCONS_00224870 | XLOC_019135 | -         | 2003  | 1.79271  | 0.496913 | 1.85108  | 0.00155 | 0.0278206 |
| NM_032784.3    | 84870       | RSPO3     | 2141  | 2.69012  | 6.00178  | -1.15772 | 0.00155 | 0.0278206 |
| NM_031427.3    | 83544       | DNAL1     | 8524  | 6.98183  | 13.282   | -0.92780 | 0.0016  | 0.0284826 |
| NM_006006.4    | 7704        | ZBTB16    | 2407  | 4.35511  | 11.3056  | -1.37626 | 0.0016  | 0.0284826 |
| NM_032777.9    | 25960       | GPR124    | 6034  | 14.0118  | 24.1094  | -0.78295 | 0.0016  | 0.0284826 |
| NM_000246.3    | 4261        | CIITA     | 4654  | 11.3234  | 6.35282  | 0.83384  | 0.0016  | 0.0284826 |
| NM_001678.3    | 482         | ATP1B2    | 3332  | 0.995796 | 2.46752  | -1.30914 | 0.0016  | 0.0284826 |
| NM_021064.4    | 8969        | HIST1H2AG | 498   | 59.9713  | 29.175   | 1.03954  | 0.0016  | 0.0284826 |
| NM_021109.3    | 7114        | TMSB4X    | 629   | 684.607  | 374.059  | 0.87201  | 0.0016  | 0.0284826 |
| NM_014714.3    | 9742        | IFT140    | 5268  | 5.37717  | 10.3984  | -0.95145 | 0.0016  | 0.0284826 |
| NM_012463.3    | 23545       | ATP6V0A2  | 6542  | 14.3382  | 8.6965   | 0.72136  | 0.0016  | 0.0284826 |
| NM_005524.3    | 3280        | HES1      | 1461  | 27.2982  | 14.9181  | 0.87174  | 0.0016  | 0.0284826 |
| NM_182633.1    | 349075      | ZNF713    | 2065  | 5.14634  | 10.3758  | -1.01160 | 0.0016  | 0.0284826 |
| NM_001122962.1 | 284759      | SIRPB2    | 2833  | 2.8641   | 0.815921 | 1.81158  | 0.0016  | 0.0284826 |
| NM_006065.3    | 10326       | SIRPB1    | 2413  | 1.93664  | 0.485706 | 1.99540  | 0.0016  | 0.0284826 |
| NM_018102.3    | 55713       | ZNF334    | 2455  | 3.58018  | 8.65895  | -1.27416 | 0.0016  | 0.0284826 |
| NM_001172779.1 | 151827      | LRRC34    | 1840  | 5.01262  | 11.8738  | -1.24415 | 0.0016  | 0.0284826 |
| NM_023073.3    | 65250       | C5orf42   | 11199 | 19.4587  | 33.5119  | -0.78426 | 0.0016  | 0.0284826 |
| NM_002952.3    | 6187        | RPS2      | 942   | 673.144  | 372.328  | 0.85434  | 0.0016  | 0.0284826 |
| NM_024848.1    | 79906       | MORN1     | 1641  | 3.20908  | 7.25234  | -1.17629 | 0.0016  | 0.0284826 |
| NM_018043.5    | 55107       | ANO1      | 4807  | 11.5602  | 6.33064  | 0.86874  | 0.00165 | 0.0290957 |
| NM_001025598.1 | 257106      | ARHGAP30  | 4425  | 15.2027  | 8.74023  | 0.79858  | 0.00165 | 0.0290957 |
| NM_003332.3    | 7305        | TYROBP    | 591   | 29.4854  | 11.7458  | 1.32786  | 0.00165 | 0.0290957 |
| NM_001160306.1 | 8867        | SYNJ1     | 6942  | 7.81988  | 4.52052  | 0.79066  | 0.00165 | 0.0290957 |
| TCONS_00132177 | XLOC_010677 | -         | 3357  | 3.1968   | 1.3971   | 1.19420  | 0.00165 | 0.0290957 |
| NM_002577.4    | 5062        | PAK2      | 6139  | 35.8223  | 21.1269  | 0.76178  | 0.00165 | 0.0290957 |
| NM_000201.2    | 3383        | ICAM1     | 3246  | 12.0421  | 6.61486  | 0.86430  | 0.00165 | 0.0290957 |
| NM_001163.3    | 320         | APBA1     | 6584  | 2.69559  | 1.32419  | 1.02549  | 0.00165 | 0.0290957 |
| NM_005067.5    | 6478        | SLAH2     | 2620  | 22.2064  | 12.6633  | 0.81032  | 0.00165 | 0.0290957 |
| NM_002839.3    | 5789        | PTPRD     | 10110 | 3.64831  | 7.55436  | -1.05008 | 0.00165 | 0.0290957 |
| NM_001042599.1 | 2066        | ERBB4     | 11875 | 1.83523  | 7.40774  | -2.01307 | 0.00165 | 0.0290957 |
| NM_001080444.1 | 150084      | IGSF5     | 2066  | 0.115253 | 0.907261 | -2.97671 | 0.00165 | 0.0290957 |
| NM_005688.2    | 10057       | ABCC5     | 5845  | 17.1981  | 9.1921   | 0.90378  | 0.00165 | 0.0290957 |
| NM_024581.4    | 79632       | FAM184A   | 4044  | 2.7369   | 7.33535  | -1.42232 | 0.00165 | 0.0290957 |
| NM_177972.2    | 7275        | TUB       | 6158  | 4.99689  | 11.2715  | -1.17358 | 0.00165 | 0.0290957 |
| NM_001042784.1 | 339965      | CCDC158   | 3626  | 0.588166 | 1.55677  | -1.40426 | 0.0017  | 0.0297668 |
| NM_002405.3    | 4242        | MFNG      | 2129  | 7.10347  | 3.27754  | 1.11591  | 0.0017  | 0.0297668 |
| NM_007223.1    | 11245       | GPR176    | 2816  | 8.41638  | 4.19125  | 1.00582  | 0.0017  | 0.0297668 |
| NM_001242908.1 | 284654      | RSPO1     | 2910  | 6.16402  | 12.2863  | -0.99510 | 0.0017  | 0.0297668 |
| NM_000422.2    | 3872        | KRT17     | 1574  | 89.3656  | 52.2859  | 0.77330  | 0.0017  | 0.0297668 |
| NM_001846.2    | 1284        | COL4A2    | 6264  | 53.7907  | 30.0001  | 0.84239  | 0.0017  | 0.0297668 |
| NM_001114086.1 | 53405       | CLIC5     | 5976  | 1.42588  | 4.12619  | -1.53296 | 0.0017  | 0.0297668 |
| NM_022443.4    | 4291        | MLF1      | 2202  | 8.95539  | 18.4954  | -1.04633 | 0.0017  | 0.0297668 |
| NM_144993.1    | 200424      | TET3      | 10983 | 8.97817  | 5.34272  | 0.74885  | 0.0017  | 0.0297668 |
| NM_004949.3    | 1824        | DSC2      | 5245  | 4.18563  | 1.10952  | 1.91550  | 0.0017  | 0.0297668 |

|                   |                   |               |       |          |          |          |         |           |
|-------------------|-------------------|---------------|-------|----------|----------|----------|---------|-----------|
| NM_002787.4       | 5683              | PSMA2         | 1466  | 42.1195  | 24.3587  | 0.79005  | 0.0017  | 0.0297668 |
| NM_005442.2       | 8320              | EOMES         | 2754  | 2.49774  | 5.42319  | -1.11852 | 0.0017  | 0.0297668 |
| NM_001882.3       | 1393              | CRHBP         | 1838  | 0.784935 | 2.22215  | -1.50131 | 0.0017  | 0.0297668 |
| NM_001481.2       | 2622              | GAS8          | 3185  | 4.58849  | 8.68878  | -0.92113 | 0.00175 | 0.0304286 |
| NM_001004067.3    | 408050            | NOMO3         | 4316  | 2.47637  | 0.990041 | 1.32267  | 0.00175 | 0.0304286 |
| NM_138706.3       | 192134            | B3GNT6        | 2513  | 0.881246 | 0.168465 | 2.38710  | 0.00175 | 0.0304286 |
| NM_006845.3       | 11004             | KIF2C         | 2881  | 2.40072  | 0.887555 | 1.43556  | 0.00175 | 0.0304286 |
| TCONS_00222281    | XLOC_019267       | -             | 1162  | 0.725492 | 2.61527  | -1.84993 | 0.00175 | 0.0304286 |
| TCONS_00198995    | XLOC_018278       | -             | 7767  | 0.679529 | 2.95969  | -2.12284 | 0.00175 | 0.0304286 |
| NM_001039573.2    | 6397              | SEC14L1       | 3017  | 41.5329  | 18.8912  | 1.13654  | 0.00175 | 0.0304286 |
| NM_080388.1       | 140576            | S100A16       | 1068  | 33.8482  | 18.3125  | 0.88625  | 0.00175 | 0.0304286 |
| NM_004334.2       | 683               | BST1          | 1480  | 9.51768  | 4.11828  | 1.20857  | 0.00175 | 0.0304286 |
| NM_033119.4       | 85407             | NKD1          | 8716  | 4.78997  | 8.38439  | -0.80769 | 0.00175 | 0.0304286 |
| NM_021071.2       | 420               | ART4          | 1371  | 0.704189 | 2.45888  | -1.80397 | 0.00175 | 0.0304286 |
| NM_175862.4       | 942               | CD86          | 2727  | 13.1315  | 6.90471  | 0.92738  | 0.00175 | 0.0304286 |
| NM_205839.2       | 7940              | LST1          | 764   | 18.0237  | 2.39104  | 2.91418  | 0.00175 | 0.0304286 |
| NM_002754.3       | 5603              | MAPK13        | 1888  | 12.2112  | 6.09402  | 1.00274  | 0.00175 | 0.0304286 |
| TCONS_00202755    | XLOC_017959       | -             | 2625  | 0.173812 | 0.755553 | -2.12000 | 0.0018  | 0.0310732 |
| NM_001001794.3    | 414918            | FAM116B       | 2006  | 2.73041  | 6.09827  | -1.15928 | 0.0018  | 0.0310732 |
| NM_004309.4       | 396               | ARHGDI1       | 1906  | 20.7878  | 11.6734  | 0.83252  | 0.0018  | 0.0310732 |
| NM_001122951.2    | 2532              | DARC          | 1242  | 14.9191  | 5.26575  | 1.50245  | 0.0018  | 0.0310732 |
| NM_003005.3       | 6403              | SELP          | 3172  | 28.0713  | 16.3145  | 0.78294  | 0.0018  | 0.0310732 |
| NM_000063.4       | 717               | C2            | 2838  | 15.8909  | 7.39082  | 1.10440  | 0.0018  | 0.0310732 |
| NM_173567.4       | 253152            | EPHX4         | 1443  | 1.7312   | 0.437835 | 1.98332  | 0.0018  | 0.0310732 |
| NM_003115.4       | 6675              | UAP1          | 2327  | 75.8248  | 44.9218  | 0.75525  | 0.0018  | 0.0310732 |
| NM_144650.2       | 137872            | ADHFE1        | 1895  | 2.5768   | 5.88896  | -1.19244 | 0.0018  | 0.0310732 |
| NM_005266.5       | 2702              | GJA5          | 3177  | 6.8794   | 2.81517  | 1.28906  | 0.0018  | 0.0310732 |
| NM_014302.3       | 23480             | SEC61G        | 466   | 140.836  | 77.2675  | 0.86609  | 0.0018  | 0.0310732 |
| NM_020733.1       | 57493             | HEG1          | 9156  | 54.613   | 27.0621  | 1.01297  | 0.0018  | 0.0310732 |
| NM_003246.2       | 7057              | THBS1         | 5790  | 511.283  | 108.638  | 2.23459  | 0.0018  | 0.0310732 |
| NM_145287.3       | 162655            | ZNF519        | 6810  | 2.33647  | 4.32797  | -0.88936 | 0.0018  | 0.0310732 |
| NM_003921.4       | 8915              | BCL10         | 3105  | 15.7959  | 9.04308  | 0.80467  | 0.00185 | 0.0317167 |
| NM_001949.3       | 1871              | E2F3          | 5009  | 4.31557  | 2.23697  | 0.94801  | 0.00185 | 0.0317167 |
| NM_005347.4       | 3309              | HSPA5         | 3970  | 107.736  | 62.5368  | 0.78472  | 0.00185 | 0.0317167 |
| NM_207361.4       | 341640            | FREM2         | 16163 | 3.21662  | 5.68093  | -0.82058 | 0.00185 | 0.0317167 |
| NM_001080383.1    | 10052             | GJC1          | 7640  | 5.39705  | 1.88381  | 1.51851  | 0.00185 | 0.0317167 |
| NM_017639.3       | 54798             | DCHS2         | 8912  | 4.76398  | 1.68035  | 1.50341  | 0.00185 | 0.0317167 |
| NM_025106.3       | 80176             | SPSB1         | 3118  | 13.3125  | 7.36462  | 0.85410  | 0.00185 | 0.0317167 |
| NM_018217.2       | 55741             | EDEM2         | 1913  | 13.4159  | 6.5724   | 1.02945  | 0.00185 | 0.0317167 |
| TCONS_00284596    | XLOC_024098       | -             | 1487  | 1.25694  | 0.287874 | 2.12640  | 0.00185 | 0.0317167 |
| ENST00000608794.1 | ENSG00000272870.1 | RP11-798M19.6 | 587   | 2.20942  | 7.03951  | -1.67180 | 0.0019  | 0.0323187 |
| NM_032437.2       | 84455             | EFCAB7        | 2361  | 7.87108  | 14.3294  | -0.86435 | 0.0019  | 0.0323187 |
| NM_021229.3       | 59277             | NTN4          | 3615  | 25.9555  | 43.1475  | -0.73324 | 0.0019  | 0.0323187 |
| NM_052909.3       | 153478            | PLEKHG4B      | 11515 | 0.604714 | 1.24942  | -1.04693 | 0.0019  | 0.0323187 |
| NM_006335.2       | 10440             | TIMM17A       | 1659  | 27.8967  | 15.938   | 0.80763  | 0.0019  | 0.0323187 |
| NM_014752.2       | 9789              | SPCS2         | 2708  | 20.437   | 11.7304  | 0.80093  | 0.0019  | 0.0323187 |
| NM_022777.2       | 64792             | RABL5         | 2428  | 6.96595  | 13.078   | -0.90875 | 0.0019  | 0.0323187 |
| NM_006063.2       | 10324             | KBTBD10       | 2464  | 1.53299  | 3.80224  | -1.31050 | 0.0019  | 0.0323187 |
| NM_001135148.1    | 64116             | SLC39A8       | 2607  | 25.458   | 11.8874  | 1.09869  | 0.0019  | 0.0323187 |
| NM_001002.3       | 6175              | RPLP0         | 1204  | 981.226  | 500.079  | 0.97243  | 0.0019  | 0.0323187 |
| NM_006741.3       | 5502              | PPP1R1A       | 1834  | 0.118861 | 1.20575  | -3.34258 | 0.0019  | 0.0323187 |
| NM_144968.1       | 158787            | RIBC1         | 1949  | 1.0521   | 4.57366  | -2.12008 | 0.0019  | 0.0323187 |
| NM_001849.3       | 1292              | COL6A2        | 3439  | 84.7591  | 38.1024  | 1.15349  | 0.0019  | 0.0323187 |
| NM_001091.2       | 26                | ABP1          | 2428  | 1.04662  | 0.3053   | 1.77744  | 0.00195 | 0.0329693 |

|                |             |           |      |          |          |          |         |           |
|----------------|-------------|-----------|------|----------|----------|----------|---------|-----------|
| NM_021179.1    | 57821       | C1orf114  | 1866 | 5.01895  | 21.8987  | -2.12539 | 0.00195 | 0.0329693 |
| NM_001005850.2 | 90485       | ZNF835    | 2774 | 0.526694 | 1.54335  | -1.55103 | 0.00195 | 0.0329693 |
| NM_080659.2    | 91894       | C11orf52  | 1140 | 6.17407  | 13.3858  | -1.11641 | 0.00195 | 0.0329693 |
| NM_033031.2    | 85417       | CNNB3     | 4513 | 0.339658 | 0.979016 | -1.52725 | 0.00195 | 0.0329693 |
| NM_001193628.1 | 147670      | LOC147670 | 2542 | 0.955016 | 2.38876  | -1.32266 | 0.002   | 0.0335868 |
| NM_001127651.2 | 4688        | NCF2      | 2249 | 20.6553  | 5.7269   | 1.85069  | 0.002   | 0.0335868 |
| NM_001645.3    | 341         | APOC1     | 461  | 23.4597  | 8.67208  | 1.43574  | 0.002   | 0.0335868 |
| NM_005319.3    | 3006        | HIST1H1C  | 732  | 215.547  | 127.629  | 0.75605  | 0.002   | 0.0335868 |
| TCONS_00087932 | XLOC_007810 | -         | 4484 | 0.652519 | 1.99556  | -1.61270 | 0.002   | 0.0335868 |
| NM_019015.1    | 54480       | CHPF2     | 3970 | 13.83    | 7.91414  | 0.80529  | 0.002   | 0.0335868 |
| TCONS_00177473 | XLOC_013688 | -         | 1368 | 0.30709  | 1.79126  | -2.54424 | 0.002   | 0.0335868 |
| NM_002068.2    | 2769        | GNA15     | 2132 | 10.5594  | 5.41581  | 0.96328  | 0.002   | 0.0335868 |
| NM_021963.3    | 4674        | NAP1L2    | 2576 | 2.73541  | 5.7586   | -1.07396 | 0.002   | 0.0335868 |
| NM_007256.4    | 11309       | SLCO2B1   | 4345 | 18.7533  | 10.9451  | 0.77686  | 0.002   | 0.0335868 |
| NM_144508.3    | 57082       | CASC5     | 7607 | 3.50902  | 1.82641  | 0.94206  | 0.002   | 0.0335868 |
| NM_183075.2    | 113612      | CYP2U1    | 4752 | 6.00529  | 10.4134  | -0.79414 | 0.002   | 0.0335868 |
| NM_052923.1    | 114821      | SCAND3    | 4877 | 0.629546 | 1.53673  | -1.28748 | 0.002   | 0.0335868 |
| NM_000418.2    | 3566        | IL4R      | 3668 | 17.09    | 10.0018  | 0.77289  | 0.002   | 0.0335868 |
| NM_014139.2    | 11280       | SCN11A    | 6500 | 0.272002 | 0.728756 | -1.42182 | 0.00205 | 0.0341961 |
| NM_152312.3    | 120071      | GYLTL1B   | 2528 | 1.96602  | 0.746638 | 1.39679  | 0.00205 | 0.0341961 |
| TCONS_00254192 | XLOC_021827 | -         | 2082 | 0.186104 | 2.38035  | -3.67699 | 0.00205 | 0.0341961 |
| NM_207362.2    | 343990      | C2orf55   | 3869 | 5.95742  | 10.7506  | -0.85166 | 0.00205 | 0.0341961 |
| NM_001161573.1 | 23764       | MAFF      | 2224 | 5.19088  | 1.3189   | 1.97665  | 0.00205 | 0.0341961 |
| NM_001005567.2 | 282763      | OR51B5    | 1370 | 0.388468 | 1.44035  | -1.89055 | 0.00205 | 0.0341961 |
| NM_152588.1    | 160335      | TMTC2     | 4840 | 48.6985  | 28.9545  | 0.75009  | 0.00205 | 0.0341961 |
| NM_016370.2    | 51209       | RAB9B     | 3799 | 1.1384   | 2.56204  | -1.17029 | 0.0021  | 0.0348574 |
| NM_002117.4    | 3107        | HLA-C     | 1525 | 271.276  | 154.551  | 0.81167  | 0.0021  | 0.0348574 |
| NM_004567.2    | 5210        | PFKFB4    | 3490 | 2.9009   | 1.2401   | 1.22605  | 0.0021  | 0.0348574 |
| NM_004255.3    | 9377        | COX5A     | 770  | 44.426   | 23.8837  | 0.89538  | 0.0021  | 0.0348574 |
| NM_001025266.1 | 285382      | C3orf70   | 5901 | 4.42686  | 2.2555   | 0.97284  | 0.0021  | 0.0348574 |
| NM_001100623.1 | 55041       | PLEKHB2   | 4308 | 29.5845  | 17.3336  | 0.77127  | 0.0021  | 0.0348574 |
| NM_031924.4    | 83861       | RSPH3     | 2177 | 11.6865  | 20.5768  | -0.81618 | 0.0021  | 0.0348574 |
| NM_002635.3    | 5250        | SLC25A3   | 1678 | 139.515  | 82.7466  | 0.75364  | 0.0021  | 0.0348574 |
| NM_012445.3    | 10417       | SPON2     | 1865 | 12.5583  | 5.8464   | 1.10302  | 0.0021  | 0.0348574 |
| NM_001164315.1 | 375248      | ANKRD36   | 6269 | 16.2714  | 27.2513  | -0.74399 | 0.0021  | 0.0348574 |
| NM_001037671.3 | 338809      | C12orf74  | 1858 | 3.24662  | 8.74731  | -1.42990 | 0.0021  | 0.0348574 |
| NM_152361.1    | 126272      | EID2B     | 1865 | 1.74682  | 4.13907  | -1.24457 | 0.00215 | 0.0355296 |
| NM_004177.4    | 6809        | STX3      | 6475 | 9.48532  | 5.36261  | 0.82276  | 0.00215 | 0.0355296 |
| NM_014037.2    | 28968       | SLC6A16   | 2936 | 0.414459 | 1.22907  | -1.56826 | 0.00215 | 0.0355296 |
| NM_006343.2    | 10461       | MERTK     | 3626 | 15.3279  | 25.5078  | -0.73478 | 0.00215 | 0.0355296 |
| NM_022059.2    | 58191       | CXCL16    | 2324 | 13.6643  | 6.71544  | 1.02486  | 0.00215 | 0.0355296 |
| NM_024926.2    | 79989       | TTC26     | 2151 | 7.88482  | 14.4445  | -0.87337 | 0.00215 | 0.0355296 |
| NM_173562.3    | 222658      | KCTD20    | 5018 | 38.9632  | 23.7523  | 0.71405  | 0.00215 | 0.0355296 |
| NM_001242729.1 | 54848       | ARHGEF38  | 5456 | 2.68672  | 5.34409  | -0.99210 | 0.00215 | 0.0355296 |
| NM_002178.2    | 3489        | IGFBP6    | 966  | 45.0021  | 77.1555  | -0.77778 | 0.00215 | 0.0355296 |
| NM_020779.3    | 57539       | WDR35     | 6916 | 10.8128  | 17.9311  | -0.72972 | 0.0022  | 0.0361165 |
| NM_016006.4    | 51099       | ABHD5     | 5353 | 11.4924  | 6.88171  | 0.73984  | 0.0022  | 0.0361165 |
| NM_004099.4    | 2040        | STOM      | 3074 | 119.299  | 68.3688  | 0.80317  | 0.0022  | 0.0361165 |
| NM_003304.4    | 7220        | TRPC1     | 4069 | 7.45559  | 12.8979  | -0.79074 | 0.0022  | 0.0361165 |
| NM_005250.2    | 2300        | FOXL1     | 3190 | 0.520875 | 1.40835  | -1.43500 | 0.0022  | 0.0361165 |
| NM_004394.2    | 1611        | DAP       | 2342 | 36.6997  | 21.8193  | 0.75016  | 0.0022  | 0.0361165 |
| NM_001031709.2 | 55328       | RNLS      | 2416 | 5.5012   | 11.2693  | -1.03457 | 0.0022  | 0.0361165 |
| TCONS_00254761 | XLOC_021222 | -         | 765  | 1.38939  | 4.28591  | -1.62516 | 0.0022  | 0.0361165 |
| NM_145913.3    | 160728      | SLC5A8    | 3286 | 60.7557  | 35.3996  | 0.77929  | 0.0022  | 0.0361165 |

|                |             |            |      |          |          |          |         |           |
|----------------|-------------|------------|------|----------|----------|----------|---------|-----------|
| NM_001998.2    | 2199        | FBLN2      | 4183 | 9.56368  | 4.47021  | 1.09722  | 0.0022  | 0.0361165 |
| NM_014365.2    | 26353       | HSPB8      | 2002 | 10.5962  | 5.46362  | 0.95561  | 0.0022  | 0.0361165 |
| NM_006986.3    | 9500        | MAGED1     | 2744 | 40.0258  | 21.5942  | 0.89029  | 0.0022  | 0.0361165 |
| NM_016619.2    | 51316       | PLAC8      | 1403 | 48.4397  | 82.614   | -0.77020 | 0.0022  | 0.0361165 |
| NM_018482.2    | 50807       | ASAP1      | 6042 | 29.2342  | 17.4535  | 0.74414  | 0.00225 | 0.0367046 |
| NM_016113.4    | 51393       | TRPV2      | 2808 | 6.88418  | 3.49456  | 0.97818  | 0.00225 | 0.0367046 |
| NM_014441.2    | 27180       | SIGLEC9    | 1718 | 2.33866  | 0.745135 | 1.65011  | 0.00225 | 0.0367046 |
| NM_003714.2    | 8614        | STC2       | 5343 | 1.74891  | 0.756937 | 1.20821  | 0.00225 | 0.0367046 |
| NM_153498.2    | 57118       | CAMK1D     | 2242 | 15.4831  | 7.49063  | 1.04754  | 0.00225 | 0.0367046 |
| NM_014298.3    | 23475       | QPRT       | 1555 | 6.08016  | 2.60317  | 1.22384  | 0.00225 | 0.0367046 |
| NM_033105.4    | 85479       | DNAJC5B    | 1380 | 0.717161 | 2.29644  | -1.67903 | 0.00225 | 0.0367046 |
| NM_182603.2    | 338699      | ANKRD42    | 2562 | 6.16383  | 11.2156  | -0.86361 | 0.00225 | 0.0367046 |
| NM_001145636.1 | 339541      | C1orf228   | 1685 | 2.17127  | 5.01943  | -1.20898 | 0.00225 | 0.0367046 |
| NM_006759.3    | 7360        | UGP2       | 2168 | 69.2424  | 27.9467  | 1.30898  | 0.00225 | 0.0367046 |
| TCONS_00012089 | XLOC_000775 | -          | 4929 | 0.82346  | 1.84909  | -1.16705 | 0.0023  | 0.0373663 |
| NM_000905.3    | 4852        | NPY        | 560  | 1.11647  | 5.04522  | -2.17597 | 0.0023  | 0.0373663 |
| NM_002146.4    | 3213        | HOXB3      | 3618 | 0.828945 | 2.11612  | -1.35207 | 0.0023  | 0.0373663 |
| NM_006178.3    | 4905        | NSF        | 3983 | 29.5909  | 18.1373  | 0.70620  | 0.0023  | 0.0373663 |
| NM_153714.2    | 256815      | C10orf67   | 2943 | 0.531848 | 1.52933  | -1.52381 | 0.0023  | 0.0373663 |
| NM_001190201.1 | 283848      | CES4A      | 2167 | 2.60357  | 7.01003  | -1.42893 | 0.00235 | 0.0379132 |
| TCONS_00253855 | XLOC_021286 | -          | 1437 | 0.466937 | 1.89396  | -2.02011 | 0.00235 | 0.0379132 |
| NM_006843.2    | 10993       | SDS        | 1605 | 1.22725  | 0.322729 | 1.92704  | 0.00235 | 0.0379132 |
| NM_001166114.1 | 10908       | PNPLA6     | 4389 | 8.08424  | 3.49178  | 1.21115  | 0.00235 | 0.0379132 |
| NM_005557.3    | 3868        | KRT16      | 1718 | 1.56211  | 0.1655   | 3.23859  | 0.00235 | 0.0379132 |
| NM_021960.4    | 4170        | MCL1       | 4085 | 214.979  | 75.5478  | 1.50873  | 0.00235 | 0.0379132 |
| NM_001142958.1 | 201456      | FBXO15     | 1721 | 3.4157   | 8.4114   | -1.30016 | 0.00235 | 0.0379132 |
| NM_001793.4    | 1001        | CDH3       | 4276 | 15.7556  | 8.94233  | 0.81715  | 0.00235 | 0.0379132 |
| NM_002728.4    | 5553        | PRG2       | 857  | 4.98496  | 1.23998  | 2.00726  | 0.00235 | 0.0379132 |
| NM_003027.3    | 6457        | SH3GL3     | 1695 | 0.130498 | 1.0983   | -3.07317 | 0.00235 | 0.0379132 |
| NM_004069.3    | 1175        | AP2S1      | 890  | 28.4455  | 14.4736  | 0.97478  | 0.00235 | 0.0379132 |
| NM_172365.1    | 145376      | C14orf50   | 1405 | 4.56697  | 9.90947  | -1.11757 | 0.00235 | 0.0379132 |
| NM_033054.2    | 64005       | MYO1G      | 3279 | 6.89137  | 3.57664  | 0.94619  | 0.0024  | 0.03848   |
| NM_006588.2    | 27233       | SULT1C4    | 1664 | 1.17284  | 3.13391  | -1.41796 | 0.0024  | 0.03848   |
| NM_001145073.1 | 389856      | USP27X     | 2700 | 2.23496  | 4.75066  | -1.08788 | 0.0024  | 0.03848   |
| NM_014287.3    | 23420       | NOMO1      | 4247 | 17.1197  | 10.1733  | 0.75087  | 0.0024  | 0.03848   |
| NM_005806.2    | 10215       | OLIG2      | 2488 | 1.08761  | 0.295285 | 1.88098  | 0.0024  | 0.03848   |
| NM_015210.3    | 23255       | CCDC165    | 6092 | 1.90827  | 0.900782 | 1.08301  | 0.0024  | 0.03848   |
| NM_145018.3    | 220042      | C11orf82   | 3565 | 2.03961  | 0.856252 | 1.25218  | 0.0024  | 0.03848   |
| NM_003814.4    | 8748        | ADAM20     | 2792 | 0.87386  | 2.15419  | -1.30167 | 0.0024  | 0.03848   |
| NM_004195.2    | 8784        | TNFRSF18   | 1200 | 2.07902  | 0.534908 | 1.95855  | 0.0024  | 0.03848   |
| NM_152649.2    | 197259      | MLKL       | 2506 | 12.4706  | 6.76554  | 0.88225  | 0.0024  | 0.03848   |
| NM_031476.3    | 83716       | CRISPLD2   | 4589 | 32.2142  | 18.6098  | 0.79163  | 0.00245 | 0.039114  |
| NM_001136572.1 | 441317      | FAM90A7    | 1957 | 0.42689  | 1.36013  | -1.67181 | 0.00245 | 0.039114  |
| NM_018957.3    | 23616       | SH3BP1     | 2576 | 5.86324  | 2.90004  | 1.01562  | 0.00245 | 0.039114  |
| NM_152773.4    | 255758      | TCTEX1D2   | 679  | 9.06833  | 20.028   | -1.14311 | 0.00245 | 0.039114  |
| NM_003937.2    | 8942        | KYNU       | 1672 | 16.7319  | 6.80954  | 1.29697  | 0.00245 | 0.039114  |
| NM_005321.2    | 3008        | HIST1H1E   | 785  | 161.519  | 98.6839  | 0.71082  | 0.00245 | 0.039114  |
| NM_018485.1    | 27202       | GPR77      | 1287 | 2.52364  | 0.753032 | 1.74472  | 0.00245 | 0.039114  |
| NM_030965.1    | 81849       | ST6GALNAC5 | 2032 | 1.68723  | 0.489561 | 1.78510  | 0.00245 | 0.039114  |
| NM_017491.3    | 9948        | WDR1       | 3143 | 73.5608  | 45.0292  | 0.70808  | 0.00245 | 0.039114  |
| TCONS_00281560 | XLOC_024256 | -          | 1326 | 0.493882 | 1.97159  | -1.99712 | 0.00245 | 0.039114  |
| NM_001624.2    | 202         | AIM1       | 7553 | 29.6105  | 17.8316  | 0.73168  | 0.0025  | 0.0397144 |
| NM_006600.2    | 10726       | NUDC       | 1327 | 30.6356  | 51.7624  | -0.75670 | 0.0025  | 0.0397144 |
| NM_012310.4    | 24137       | KIF4A      | 4501 | 1.8999   | 0.800005 | 1.24784  | 0.0025  | 0.0397144 |

|                   |                   |              |       |           |           |          |         |           |
|-------------------|-------------------|--------------|-------|-----------|-----------|----------|---------|-----------|
| XM_003403513.1    | 220416            | LRRC63       | 2187  | 0.369106  | 2.60232   | -2.81769 | 0.0025  | 0.0397144 |
| NM_153695.3       | 195828            | ZNF367       | 3704  | 3.39158   | 1.5645    | 1.11625  | 0.0025  | 0.0397144 |
| NM_001040456.1    | 57414             | RHBDD2       | 1756  | 16.3382   | 7.59804   | 1.10455  | 0.0025  | 0.0397144 |
| NM_002526.3       | 4907              | NT5E         | 4068  | 16.6419   | 27.6155   | -0.73066 | 0.00255 | 0.0402995 |
| NM_139055.2       | 170689            | ADAMTS15     | 5676  | 2.80396   | 1.3738    | 1.02930  | 0.00255 | 0.0402995 |
| NM_005380.6       | 4681              | NBL1         | 2026  | 89.8563   | 166.887   | -0.89318 | 0.00255 | 0.0402995 |
| NM_001001389.1    | 960               | CD44         | 5603  | 77.5753   | 8.38604   | 3.20954  | 0.00255 | 0.0402995 |
| ENST00000418025.1 | ENSG00000228162.1 | AC097713.3   | 562   | 4.45833   | 1.06907   | 2.06015  | 0.00255 | 0.0402995 |
| NM_006211.3       | 5179              | PENK         | 1203  | 2.12553   | 0.510716  | 2.05723  | 0.00255 | 0.0402995 |
| NM_001775.2       | 952               | CD38         | 1491  | 23.3754   | 12.6906   | 0.88123  | 0.00255 | 0.0402995 |
| NM_152665.2       | 200132            | TCTEX1D1     | 2264  | 6.17739   | 11.4523   | -0.89057 | 0.00255 | 0.0402995 |
| NM_153712.4       | 150465            | TTL          | 5164  | 10.8557   | 6.27765   | 0.79016  | 0.00255 | 0.0402995 |
| NM_001102469.1    | 643418            | LIPN         | 1197  | 7.02151   | 0.0708131 | 6.63162  | 0.0026  | 0.040888  |
| NM_022153.1       | 64115             | C10orf54     | 4774  | 20.5515   | 11.162    | 0.88064  | 0.0026  | 0.040888  |
| NM_025204.2       | 80305             | TRABD        | 2315  | 9.16677   | 4.75302   | 0.94757  | 0.0026  | 0.040888  |
| TCONS_00282968    | XLOC_023779       | -            | 4918  | 1.34307   | 4.54485   | -1.75870 | 0.0026  | 0.040888  |
| NM_005013.2       | 4925              | NUCB2        | 1612  | 123.968   | 215.883   | -0.80028 | 0.0026  | 0.040888  |
| NM_003855.2       | 8809              | IL18R1       | 3522  | 10.1074   | 5.72651   | 0.81968  | 0.0026  | 0.040888  |
| NM_001242759.1    | 100505676         | LOC100505676 | 4368  | 0.966707  | 2.18847   | -1.17878 | 0.0026  | 0.040888  |
| NM_022044.2       | 23753             | SDF2L1       | 874   | 12.5753   | 5.65895   | 1.15199  | 0.0026  | 0.040888  |
| NM_003387.4       | 7456              | WIPF1        | 4585  | 33.6363   | 19.2123   | 0.80799  | 0.0026  | 0.040888  |
| XM_003403440.1    | 100652802         | LOC100652802 | 575   | 7.8789    | 0.189954  | 5.37427  | 0.0026  | 0.040888  |
| NM_001080836.2    | 644890            | MEIG1        | 625   | 0.515749  | 3.75448   | -2.86387 | 0.0026  | 0.040888  |
| NM_138328.2       | 162494            | RHBDL3       | 4661  | 0.336494  | 0.892206  | -1.40679 | 0.00265 | 0.0415288 |
| NM_000057.2       | 641               | BLM          | 4528  | 3.41435   | 1.66242   | 1.03833  | 0.00265 | 0.0415288 |
| NM_032564.3       | 84649             | DGAT2        | 2452  | 2.62874   | 1.11256   | 1.24049  | 0.00265 | 0.0415288 |
| NM_015549.1       | 26030             | PLEKHG3      | 4400  | 7.27324   | 4.13705   | 0.81400  | 0.00265 | 0.0415288 |
| NM_138736.2       | 2775              | GNAO1        | 6211  | 3.51673   | 1.72249   | 1.02974  | 0.00265 | 0.0415288 |
| TCONS_00021576    | XLOC_001928       | -            | 3961  | 0.820436  | 1.94824   | -1.24771 | 0.0027  | 0.0421065 |
| NM_018984.3       | 54434             | SSH1         | 8535  | 10.1446   | 6.06703   | 0.74165  | 0.0027  | 0.0421065 |
| NM_139018.3       | 146722            | CD300LF      | 1759  | 10.171    | 1.59191   | 2.67563  | 0.0027  | 0.0421065 |
| NM_015932.5       | 51371             | POMP         | 1462  | 43.8595   | 25.9147   | 0.75912  | 0.0027  | 0.0421065 |
| NM_001144892.1    | 2246              | FGF1         | 3660  | 5.53292   | 0.814182  | 2.76462  | 0.0027  | 0.0421065 |
| NM_001660.3       | 378               | ARF4         | 1740  | 132.994   | 81.3809   | 0.70860  | 0.0027  | 0.0421065 |
| NM_003059.2       | 6583              | SLC22A4      | 2192  | 8.28216   | 14.7167   | -0.82938 | 0.0027  | 0.0421065 |
| NM_198391.2       | 23767             | FLRT3        | 4024  | 4.14387   | 11.3487   | -1.45348 | 0.0027  | 0.0421065 |
| NM_145273.3       | 146894            | CD300LG      | 2786  | 0.0748997 | 0.777111  | -3.37509 | 0.00275 | 0.0426687 |
| NM_001172626.1    | 270               | AMPD1        | 2395  | 5.45253   | 1.01457   | 2.42606  | 0.00275 | 0.0426687 |
| NM_005990.3       | 6793              | STK10        | 6019  | 13.4354   | 8.05933   | 0.73731  | 0.00275 | 0.0426687 |
| NM_016323.2       | 51191             | HERC5        | 3513  | 5.74998   | 9.90241   | -0.78422 | 0.00275 | 0.0426687 |
| TCONS_00287275    | XLOC_023844       | -            | 5550  | 3.35262   | 7.50074   | -1.16174 | 0.00275 | 0.0426687 |
| NM_014397.5       | 10783             | NEK6         | 2635  | 21.234    | 7.59237   | 1.48375  | 0.0028  | 0.0432452 |
| NM_001242531.1    | 55769             | ZNF83        | 2965  | 6.38417   | 19.8156   | -1.63407 | 0.0028  | 0.0432452 |
| NM_001669.2       | 414               | ARSD         | 5159  | 11.5384   | 18.9618   | -0.71665 | 0.0028  | 0.0432452 |
| NM_021227.2       | 58505             | OSTC         | 1078  | 83.2892   | 49.9734   | 0.73697  | 0.0028  | 0.0432452 |
| NM_012092.3       | 29851             | ICOS         | 2645  | 6.43773   | 3.03202   | 1.08627  | 0.0028  | 0.0432452 |
| TCONS_00219619    | XLOC_019274       | -            | 1508  | 2.00295   | 4.91021   | -1.29366 | 0.0028  | 0.0432452 |
| NM_001145966.1    | 4288              | MKI67        | 11417 | 2.66654   | 0.782924  | 1.76803  | 0.0028  | 0.0432452 |
| NM_030796.3       | 81552             | VOPP1        | 2944  | 46.6351   | 28.2484   | 0.72325  | 0.0028  | 0.0432452 |
| NM_022909.3       | 64946             | CENPH        | 1389  | 6.46662   | 2.82724   | 1.19362  | 0.00285 | 0.0437663 |
| XM_001722384.2    | 100130589         | LOC100130589 | 1356  | 0.186654  | 1.17206   | -2.65061 | 0.00285 | 0.0437663 |
| NM_032849.3       | 84935             | C13orf33     | 2390  | 2.79697   | 1.21091   | 1.20777  | 0.00285 | 0.0437663 |
| NM_173464.3       | 91133             | L3MBTL4      | 3587  | 4.81802   | 8.61905   | -0.83909 | 0.00285 | 0.0437663 |
| XM_003403515.1    | 389422            | C6orf183     | 2081  | 1.23713   | 3.09749   | -1.32411 | 0.00285 | 0.0437663 |

|                |             |          |       |          |          |          |         |           |
|----------------|-------------|----------|-------|----------|----------|----------|---------|-----------|
| NM_175726.2    | 3568        | IL5RA    | 2346  | 8.17471  | 17.5844  | -1.10505 | 0.00285 | 0.0437663 |
| NM_138408.3    | 112495      | GTF3C6   | 950   | 36.4937  | 20.0765  | 0.86214  | 0.00285 | 0.0437663 |
| NM_153649.3    | 7170        | TPM3     | 3212  | 99.2458  | 57.4959  | 0.78755  | 0.00285 | 0.0437663 |
| NM_001841.2    | 1269        | CNR2     | 1775  | 2.02296  | 0.713825 | 1.50282  | 0.00285 | 0.0437663 |
| NM_024324.3    | 79174       | CRELD2   | 1428  | 19.9681  | 10.57    | 0.91773  | 0.00285 | 0.0437663 |
| NM_013416.3    | 4689        | NCF4     | 1643  | 7.01952  | 2.3205   | 1.59694  | 0.0029  | 0.0443924 |
| NM_002547.2    | 4983        | OPHN1    | 7531  | 29.5533  | 51.5959  | -0.80394 | 0.0029  | 0.0443924 |
| NM_005558.3    | 3898        | LAD1     | 2839  | 5.64895  | 2.73005  | 1.04906  | 0.0029  | 0.0443924 |
| NM_003633.2    | 8507        | ENC1     | 5517  | 15.4701  | 9.47383  | 0.70746  | 0.0029  | 0.0443924 |
| NM_001199622.1 | 135112      | NCOA7    | 4052  | 27.0207  | 3.32381  | 3.02315  | 0.0029  | 0.0443924 |
| NM_006344.2    | 10462       | CLEC10A  | 1699  | 14.3431  | 2.22441  | 2.68887  | 0.0029  | 0.0443924 |
| NM_018424.2    | 54566       | EPB41L4B | 3783  | 8.69365  | 15.1216  | -0.79858 | 0.0029  | 0.0443924 |
| NM_002524.4    | 4893        | NRAS     | 4454  | 27.8864  | 17.1298  | 0.70306  | 0.00295 | 0.0449329 |
| NM_018487.2    | 55365       | TMEM176A | 1038  | 30.2817  | 8.92259  | 1.76291  | 0.00295 | 0.0449329 |
| NM_000714.4    | 706         | TSPO     | 866   | 31.503   | 16.6691  | 0.91831  | 0.00295 | 0.0449329 |
| NM_001001872.2 | 145407      | C14orf37 | 3082  | 4.74715  | 8.73804  | -0.88025 | 0.00295 | 0.0449329 |
| NM_006863.1    | 11024       | LILRA1   | 1910  | 1.31357  | 0.395172 | 1.73294  | 0.00295 | 0.0449329 |
| NM_016332.2    | 51734       | SEPX1    | 1367  | 7.3396   | 3.32089  | 1.14413  | 0.00295 | 0.0449329 |
| NM_001003.2    | 6176        | RPLP1    | 512   | 1036.09  | 623.104  | 0.73361  | 0.00295 | 0.0449329 |
| NM_004133.4    | 3174        | HNF4G    | 4101  | 1.70434  | 3.51507  | -1.04434 | 0.00295 | 0.0449329 |
| TCONS_00183144 | XLOC_015454 | -        | 851   | 2.38247  | 0.590287 | 2.01297  | 0.00295 | 0.0449329 |
| NM_152515.3    | 150468      | CKAP2L   | 3273  | 1.98622  | 0.845568 | 1.23203  | 0.00295 | 0.0449329 |
| NM_182472.2    | 2044        | EPAH5    | 7792  | 0.269495 | 0.787961 | -1.54786 | 0.003   | 0.0454886 |
| NM_144705.2    | 150483      | TEKT4    | 1455  | 1.08178  | 3.08735  | -1.51296 | 0.003   | 0.0454886 |
| NM_144590.2    | 118932      | ANKRD22  | 3986  | 0.682676 | 1.79234  | -1.39257 | 0.003   | 0.0454886 |
| NM_032140.1    | 84080       | C16orf48 | 1538  | 4.70851  | 9.48455  | -1.01031 | 0.003   | 0.0454886 |
| NM_006682.2    | 10875       | FGL2     | 4268  | 100.65   | 37.1138  | 1.43932  | 0.003   | 0.0454886 |
| NM_024997.2    | 80063       | ATF7IP2  | 3597  | 5.53363  | 9.57063  | -0.79039 | 0.003   | 0.0454886 |
| TCONS_00080459 | XLOC_006697 | -        | 1752  | 0.783673 | 3.70694  | -2.24191 | 0.003   | 0.0454886 |
| NM_021197.2    | 58189       | WFDC1    | 1378  | 10.2396  | 4.80341  | 1.09203  | 0.00305 | 0.04606   |
| NM_001011720.1 | 389668      | XKR9     | 3174  | 3.11323  | 5.97591  | -0.94075 | 0.00305 | 0.04606   |
| NM_001010919.1 | 441168      | FAM26F   | 1109  | 3.51969  | 8.11979  | -1.20599 | 0.00305 | 0.04606   |
| NM_020747.2    | 57507       | ZNF608   | 5645  | 8.19366  | 13.5527  | -0.72600 | 0.00305 | 0.04606   |
| NM_005801.3    | 10209       | EIF1     | 1326  | 197.258  | 121.592  | 0.69804  | 0.00305 | 0.04606   |
| NM_002610.3    | 5163        | PDK1     | 4576  | 34.0586  | 9.17787  | 1.89179  | 0.00305 | 0.04606   |
| NM_031271.3    | 56154       | TEX15    | 10112 | 0.869623 | 0.3842   | 1.17853  | 0.0031  | 0.0465955 |
| NM_001130414.1 | 321         | APBA2    | 3603  | 2.19784  | 4.34045  | -0.98176 | 0.0031  | 0.0465955 |
| NM_001543.4    | 3340        | NDST1    | 8030  | 17.1326  | 10.5834  | 0.69495  | 0.0031  | 0.0465955 |
| TCONS_00065904 | XLOC_006375 | -        | 1374  | 0.29261  | 1.27872  | -2.12765 | 0.0031  | 0.0465955 |
| NM_001080393.1 | 727936      | GXYLT2   | 1547  | 10.1353  | 18.4843  | -0.86691 | 0.0031  | 0.0465955 |
| NM_004655.3    | 8313        | AXIN2    | 4234  | 12.4475  | 20.4522  | -0.71640 | 0.0031  | 0.0465955 |
| NM_003013.2    | 6423        | SFRP2    | 1990  | 139.326  | 83.2395  | 0.74312  | 0.0031  | 0.0465955 |
| NM_004091.3    | 1870        | E2F2     | 5193  | 1.10074  | 0.457063 | 1.26801  | 0.0031  | 0.0465955 |
| NM_152677.2    | 201516      | ZSCAN4   | 2246  | 0.232173 | 0.936532 | -2.01213 | 0.0031  | 0.0465955 |
| NM_000104.3    | 1545        | CYP1B1   | 5153  | 33.753   | 20.4022  | 0.72630  | 0.0031  | 0.0465955 |
| NM_001136032.2 | 11012       | KLK11    | 1181  | 2.2524   | 7.77663  | -1.78768 | 0.00315 | 0.0471261 |
| TCONS_00114649 | XLOC_009051 | -        | 3848  | 2.64177  | 1.02919  | 1.36000  | 0.00315 | 0.0471261 |
| NM_014669.4    | 9688        | NUP93    | 2922  | 16.1983  | 9.26515  | 0.80596  | 0.00315 | 0.0471261 |
| NM_001173523.1 | 5099        | PCDH7    | 8728  | 6.19838  | 13.4355  | -1.11608 | 0.00315 | 0.0471261 |
| NM_007030.2    | 11076       | TPPP     | 6022  | 2.68081  | 5.18745  | -0.95236 | 0.00315 | 0.0471261 |
| NM_001039350.1 | 1804        | DPP6     | 4705  | 1.16702  | 3.57046  | -1.61328 | 0.00315 | 0.0471261 |
| NM_145756.2    | 252884      | ZNF396   | 2788  | 2.71131  | 5.44318  | -1.00546 | 0.00315 | 0.0471261 |
| TCONS_00204494 | XLOC_018243 | -        | 1205  | 0.616991 | 2.25311  | -1.86860 | 0.00315 | 0.0471261 |
| NM_001144874.1 | 399968      | PATE4    | 1986  | 0.208086 | 0.865615 | -2.05654 | 0.0032  | 0.0476939 |



|                   |                   |               |      |          |          |          |         |           |
|-------------------|-------------------|---------------|------|----------|----------|----------|---------|-----------|
| NM_001004310.2    | 343413            | FCRL6         | 1943 | 1.50774  | 3.94811  | -1.38877 | 0.0032  | 0.0476939 |
| ENST00000419628.1 | ENSG00000225431.1 | AP001626.1    | 1775 | 0.595341 | 1.71796  | -1.52891 | 0.0032  | 0.0476939 |
| NM_001113490.1    | 154796            | AMOT          | 6945 | 6.57497  | 12.2304  | -0.89541 | 0.0032  | 0.0476939 |
| ENST00000417026.1 | ENSG00000237513.1 | RP11-325F22.2 | 891  | 2.83226  | 0.759017 | 1.89975  | 0.0032  | 0.0476939 |
| NM_004932.3       | 1004              | CDH6          | 8571 | 9.63535  | 5.7505   | 0.74465  | 0.0032  | 0.0476939 |
| NM_006438.3       | 10584             | COLEC10       | 1708 | 1.28931  | 0.375388 | 1.78014  | 0.0032  | 0.0476939 |
| NM_022818.4       | 81631             | MAP1LC3B      | 2288 | 43.2491  | 26.6058  | 0.70093  | 0.00325 | 0.0483534 |
| NM_001100818.1    | 55022             | PID1          | 2611 | 14.866   | 26.2013  | -0.81762 | 0.0033  | 0.0489028 |
| NM_001444.2       | 2171              | FABP5         | 731  | 61.637   | 35.0997  | 0.81234  | 0.0033  | 0.0489028 |
| NM_018665.2       | 55510             | DDX43         | 2696 | 1.43748  | 0.453827 | 1.66333  | 0.0033  | 0.0489028 |
| NM_138731.6       | 145282            | MIPOL1        | 6120 | 3.37155  | 10.32    | -1.61396 | 0.0033  | 0.0489028 |
| NM_153827.4       | 50488             | MINK1         | 5017 | 7.71705  | 3.36916  | 1.19566  | 0.0033  | 0.0489028 |
| NM_000218.2       | 3784              | KCNQ1         | 3246 | 4.40075  | 1.9526   | 1.17235  | 0.00335 | 0.0494369 |
| NM_002941.3       | 6091              | ROBO1         | 6839 | 10.1585  | 3.1091   | 1.70812  | 0.00335 | 0.0494369 |
| NM_018425.2       | 55361             | PI4K2A        | 4185 | 10.9131  | 6.3252   | 0.78687  | 0.00335 | 0.0494369 |
| NM_001127361.1    | 127544            | RNF19B        | 2603 | 10.481   | 3.25572  | 1.68673  | 0.00335 | 0.0494369 |
| NM_001172624.1    | 4756              | NEO1          | 7055 | 12.1324  | 20.2755  | -0.74088 | 0.00335 | 0.0494369 |
| NM_003525.2       | 8346              | HIST1H2BI     | 437  | 55.8263  | 27.0655  | 1.04449  | 0.00335 | 0.0494369 |
| NM_022763.3       | 64778             | FNDC3B        | 7015 | 37.3943  | 17.7838  | 1.07226  | 0.00335 | 0.0494369 |
| NM_001010979.1    | 388701            | C1orf189      | 387  | 5.65013  | 18.2564  | -1.69205 | 0.00335 | 0.0494369 |
| NM_003462.3       | 7802              | DNALI1        | 2649 | 11.5664  | 32.8806  | -1.50730 | 0.00335 | 0.0494369 |
| NM_004131.4       | 3002              | GZMB          | 927  | 8.68444  | 3.68794  | 1.23562  | 0.00335 | 0.0494369 |
| NM_018990.3       | 54440             | SASH3         | 2694 | 13.8878  | 7.6961   | 0.85162  | 0.00335 | 0.0494369 |

Table S4. Differentially expressed lncRNA and mRNA transcripts for non-ECRSwNP vs CTRL.

| Transcript ID     | Gene ID           | Gene name  | Length | non-ECRSwNP FPKM | CTRL FPKM | log <sub>2</sub> (foldchange) | P value  | Q value    |
|-------------------|-------------------|------------|--------|------------------|-----------|-------------------------------|----------|------------|
| NM_022136.3       | 64092             | SAMSN1     | 1888   | 34.2492          | 12.2431   | 1.48411                       | 5.00E-05 | 0.00170056 |
| NM_003248.4       | 7060              | THBS4      | 3223   | 0.367177         | 10.474    | -4.83419                      | 5.00E-05 | 0.00170056 |
| NM_001160130.1    | 56479             | KCNQ5      | 6556   | 0.604168         | 1.97105   | -1.70594                      | 5.00E-05 | 0.00170056 |
| NM_014685.2       | 9709              | HERPUD1    | 2176   | 106.739          | 49.9015   | 1.09693                       | 5.00E-05 | 0.00170056 |
| NM_025074.6       | 80144             | FRAS1      | 15624  | 1.70678          | 7.59287   | -2.15336                      | 5.00E-05 | 0.00170056 |
| NM_003608.3       | 8477              | GPR65      | 4522   | 9.4031           | 4.10697   | 1.19506                       | 5.00E-05 | 0.00170056 |
| NM_005097.2       | 9211              | LG11       | 2366   | 4.21462          | 0.473709  | 3.15333                       | 5.00E-05 | 0.00170056 |
| NM_001040272.5    | 92949             | ADAMTSL1   | 7843   | 1.80434          | 5.358     | -1.57022                      | 5.00E-05 | 0.00170056 |
| NM_003039.2       | 6518              | SLC2A5     | 2438   | 3.48966          | 0.667059  | 2.3872                        | 5.00E-05 | 0.00170056 |
| NM_002381.4       | 4148              | MATN3      | 2583   | 1.41571          | 7.7199    | -2.44706                      | 5.00E-05 | 0.00170056 |
| NM_015187.3       | 23231             | SEL1L3     | 4549   | 94.5213          | 44.7299   | 1.0794                        | 5.00E-05 | 0.00170056 |
| NM_000395.2       | 1439              | CSF2RB     | 4848   | 12.4538          | 3.70911   | 1.74744                       | 5.00E-05 | 0.00170056 |
| XM_001716834.2    | 642131            | LOC642131  | 570    | 81.0706          | 11.6645   | 2.79705                       | 5.00E-05 | 0.00170056 |
| NM_018286.2       | 55273             | TMEM100    | 1755   | 20.2749          | 55.7012   | -1.45801                      | 5.00E-05 | 0.00170056 |
| NM_001080437.1    | 25992             | SNED1      | 6834   | 6.24351          | 13.205    | -1.08065                      | 5.00E-05 | 0.00170056 |
| NM_001422.2       | 2001              | ELF5       | 2302   | 8.69459          | 23.5601   | -1.43815                      | 5.00E-05 | 0.00170056 |
| NM_023940.2       | 65997             | RASL11B    | 1957   | 5.9534           | 19.4123   | -1.70519                      | 5.00E-05 | 0.00170056 |
| ENST00000457157.2 | ENSG00000231106.2 | AP000688.8 | 1048   | 8.02273          | 27.6064   | -1.78284                      | 5.00E-05 | 0.00170056 |
| NM_020980.3       | 366               | AQP9       | 3021   | 5.48304          | 1.30761   | 2.06805                       | 5.00E-05 | 0.00170056 |
| NM_173814.4       | 283659            | PRTG       | 11973  | 2.89744          | 5.65892   | -0.96575                      | 5.00E-05 | 0.00170056 |
| NM_013358.2       | 29943             | PADI1      | 3847   | 2.86203          | 0.842389  | 1.76448                       | 5.00E-05 | 0.00170056 |
| NM_001037339.1    | 5142              | PDE4B      | 3876   | 13.6349          | 4.28492   | 1.66997                       | 5.00E-05 | 0.00170056 |
| NM_001136103.2    | 92293             | TMEM132C   | 4947   | 0.626457         | 5.482     | -3.12942                      | 5.00E-05 | 0.00170056 |
| NM_002997.4       | 6382              | SDC1       | 3201   | 56.1283          | 26.6973   | 1.07203                       | 5.00E-05 | 0.00170056 |
| NM_021928.3       | 60559             | SPCS3      | 4596   | 91.5712          | 42.2901   | 1.11458                       | 5.00E-05 | 0.00170056 |
| NM_001008781.2    | 120114            | FAT3       | 19048  | 0.611261         | 5.86196   | -3.26152                      | 5.00E-05 | 0.00170056 |
| TCONS_00081181    | XLOC_006945       | -          | 4801   | 2.92453          | 11.6812   | -1.99791                      | 5.00E-05 | 0.00170056 |
| NM_001251.2       | 968               | CD68       | 1856   | 45.5251          | 21.1771   | 1.10416                       | 5.00E-05 | 0.00170056 |
| NM_001010906.1    | 389643            | C8orf80    | 3887   | 6.11576          | 2.11896   | 1.52918                       | 5.00E-05 | 0.00170056 |
| NM_000598.4       | 3486              | IGFBP3     | 2613   | 365.724          | 71.5229   | 2.35428                       | 5.00E-05 | 0.00170056 |
| NM_001063.3       | 7018              | TF         | 2791   | 44.1466          | 4.31891   | 3.35356                       | 5.00E-05 | 0.00170056 |
| NM_005980.2       | 6286              | S100P      | 510    | 53.9113          | 5.77578   | 3.2225                        | 5.00E-05 | 0.00170056 |
| NM_014708.4       | 9735              | KNTC1      | 6965   | 14.2564          | 7.32504   | 0.960702                      | 5.00E-05 | 0.00170056 |
| NM_004079.4       | 1520              | CTSS       | 4107   | 127.782          | 58.434    | 1.12881                       | 5.00E-05 | 0.00170056 |
| NM_001036.3       | 6263              | RYR3       | 15559  | 0.556124         | 2.2559    | -2.02023                      | 5.00E-05 | 0.00170056 |
| NM_004004.5       | 2706              | GJB2       | 2334   | 14.811           | 5.78519   | 1.35624                       | 5.00E-05 | 0.00170056 |
| NM_007361.3       | 22795             | NID2       | 5046   | 5.57244          | 21.1646   | -1.92527                      | 5.00E-05 | 0.00170056 |
| NM_002514.3       | 4856              | NOV        | 2601   | 6.88939          | 34.4704   | -2.32291                      | 5.00E-05 | 0.00170056 |
| NM_002163.2       | 3394              | IRF8       | 2662   | 25.0222          | 9.67969   | 1.37017                       | 5.00E-05 | 0.00170056 |
| NM_033280.2       | 90701             | SEC11C     | 782    | 211.442          | 70.3127   | 1.58841                       | 5.00E-05 | 0.00170056 |
| NM_198964.1       | 5744              | PTHLH      | 1854   | 11.2623          | 0.810568  | 3.79642                       | 5.00E-05 | 0.00170056 |
| NM_021149.2       | 23406             | COTL1      | 1827   | 38.2875          | 17.5866   | 1.1224                        | 5.00E-05 | 0.00170056 |
| NM_002118.4       | 3109              | HLA-DMB    | 1397   | 93.8486          | 31.0085   | 1.59767                       | 5.00E-05 | 0.00170056 |
| NM_178565.4       | 340419            | RSPO2      | 3149   | 2.6254           | 0.317752  | 3.04657                       | 5.00E-05 | 0.00170056 |
| NM_000101.2       | 1535              | CYBA       | 688    | 235.814          | 76.725    | 1.61988                       | 5.00E-05 | 0.00170056 |
| NM_003897.3       | 8870              | IER3       | 1240   | 27.5977          | 10.9513   | 1.33345                       | 5.00E-05 | 0.00170056 |
| NM_152598.2       | 162333            | MARCH10    | 3101   | 3.47258          | 8.47365   | -1.28697                      | 5.00E-05 | 0.00170056 |
| NM_178135.3       | 345275            | HSD17B13   | 2395   | 1.33494          | 10.1553   | -2.92738                      | 5.00E-05 | 0.00170056 |
| NM_002003.3       | 2219              | FCN1       | 1283   | 30.9812          | 3.82727   | 3.01701                       | 5.00E-05 | 0.00170056 |
| NM_018699.2       | 11107             | PRDM5      | 2480   | 8.92824          | 20.0417   | -1.16656                      | 5.00E-05 | 0.00170056 |
| NM_001385.2       | 1807              | DPYS       | 2123   | 2.31227          | 26.7461   | -3.53195                      | 5.00E-05 | 0.00170056 |

|                |             |          |       |          |          |           |          |            |
|----------------|-------------|----------|-------|----------|----------|-----------|----------|------------|
| NM_052863.2    | 92304       | SCGB3A1  | 466   | 8.45061  | 80.549   | -3.25274  | 5.00E-05 | 0.00170056 |
| TCONS_00143168 | XLOC_012949 | -        | 546   | 0        | 2.52567  | #NAME?    | 5.00E-05 | 0.00170056 |
| NM_145170.3    | 118491      | TTC18    | 3704  | 20.0308  | 40.6025  | -1.01935  | 5.00E-05 | 0.00170056 |
| NM_005127.2    | 9976        | CLEC2B   | 2038  | 33.8776  | 12.217   | 1.47144   | 5.00E-05 | 0.00170056 |
| NM_000059.3    | 675         | BRCA2    | 11386 | 5.66493  | 2.76446  | 1.03506   | 5.00E-05 | 0.00170056 |
| NM_002117.4    | 3107        | HLA-C    | 1525  | 386.143  | 154.551  | 1.32105   | 5.00E-05 | 0.00170056 |
| NM_002964.4    | 6279        | S100A8   | 523   | 93.4571  | 20.3068  | 2.20234   | 5.00E-05 | 0.00170056 |
| NM_000702.3    | 477         | ATP1A2   | 5464  | 8.24277  | 38.7615  | -2.23342  | 5.00E-05 | 0.00170056 |
| NM_031935.2    | 83872       | HMCN1    | 18212 | 37.6918  | 11.1751  | 1.75397   | 5.00E-05 | 0.00170056 |
| NM_003014.3    | 6424        | SFRP4    | 2974  | 25.1784  | 153.406  | -2.60709  | 5.00E-05 | 0.00170056 |
| NM_001192.2    | 608         | TNFRSF17 | 994   | 21.6875  | 7.18924  | 1.59295   | 5.00E-05 | 0.00170056 |
| NM_022469.3    | 64388       | GREM2    | 4183  | 8.6881   | 17.6887  | -1.02571  | 5.00E-05 | 0.00170056 |
| NM_001005738.1 | 2358        | FPR2     | 1913  | 4.1006   | 0.818838 | 2.32418   | 5.00E-05 | 0.00170056 |
| NM_021181.3    | 57823       | SLAMF7   | 2657  | 50.9278  | 14.606   | 1.80189   | 5.00E-05 | 0.00170056 |
| NM_020056.4    | 3118        | HLA-DQA2 | 1152  | 82.7047  | 11.1448  | 2.89159   | 5.00E-05 | 0.00170056 |
| NM_000491.3    | 713         | C1QB     | 1044  | 159.757  | 69.6135  | 1.19844   | 5.00E-05 | 0.00170056 |
| NM_001711.4    | 633         | BGN      | 2444  | 15.6835  | 35.3612  | -1.17292  | 5.00E-05 | 0.00170056 |
| NM_153717.2    | 2121        | EVC      | 6430  | 4.39357  | 8.61744  | -0.971867 | 5.00E-05 | 0.00170056 |
| NM_002970.2    | 6303        | SAT1     | 1064  | 1018.91  | 294.105  | 1.79263   | 5.00E-05 | 0.00170056 |
| NM_000065.2    | 729         | C6       | 3606  | 5.57945  | 21.8203  | -1.96747  | 5.00E-05 | 0.00170056 |
| TCONS_00057873 | XLOC_005084 | -        | 5007  | 2.87482  | 8.61976  | -1.58417  | 5.00E-05 | 0.00170056 |
| NM_006646.5    | 10810       | WASF3    | 4718  | 2.2989   | 5.59466  | -1.28311  | 5.00E-05 | 0.00170056 |
| NM_007153.3    | 7757        | ZNF208   | 9088  | 1.8439   | 6.95137  | -1.91454  | 5.00E-05 | 0.00170056 |
| NM_006424.2    | 10568       | SLC34A2  | 4153  | 12.6765  | 3.01516  | 2.07185   | 5.00E-05 | 0.00170056 |
| NM_144616.3    | 126306      | JSRP1    | 1145  | 6.16069  | 1.56697  | 1.97511   | 5.00E-05 | 0.00170056 |
| NM_024560.2    | 79611       | ACSS3    | 3033  | 7.52203  | 19.9558  | -1.40761  | 5.00E-05 | 0.00170056 |
| NM_000593.5    | 6890        | TAP1     | 2952  | 51.1937  | 16.7384  | 1.6128    | 5.00E-05 | 0.00170056 |
| NM_032777.9    | 25960       | GPR124   | 6034  | 10.73    | 24.1094  | -1.16795  | 5.00E-05 | 0.00170056 |
| NM_002965.3    | 6280        | S100A9   | 577   | 86.7818  | 11.6548  | 2.89646   | 5.00E-05 | 0.00170056 |
| NM_001098484.2 | 8671        | SLC4A4   | 7693  | 15.3342  | 6.76483  | 1.18063   | 5.00E-05 | 0.00170056 |
| NM_012328.2    | 4189        | DNAJB9   | 2538  | 59.0113  | 18.8914  | 1.64326   | 5.00E-05 | 0.00170056 |
| NM_002127.5    | 3135        | HLA-G    | 1578  | 4.88624  | 0.389339 | 3.64963   | 5.00E-05 | 0.00170056 |
| NM_006280.2    | 6748        | SSR4     | 725   | 253.8    | 78.1322  | 1.6997    | 5.00E-05 | 0.00170056 |
| NM_003167.3    | 6822        | SULT2A1  | 1987  | 0.519138 | 18.6869  | -5.16977  | 5.00E-05 | 0.00170056 |
| NM_022475.2    | 64399       | HHIP     | 3555  | 3.08747  | 0.89534  | 1.78592   | 5.00E-05 | 0.00170056 |
| NM_172369.3    | 714         | C1QC     | 1168  | 65.5465  | 29.6141  | 1.14623   | 5.00E-05 | 0.00170056 |
| NM_000655.4    | 6402        | SELL     | 2442  | 22.236   | 7.72278  | 1.5257    | 5.00E-05 | 0.00170056 |
| NM_024764.2    | 79820       | CATSPERB | 3606  | 3.31545  | 0.835004 | 1.98935   | 5.00E-05 | 0.00170056 |
| NM_004967.3    | 3381        | IBSP     | 1591  | 0.283272 | 22.5586  | -6.31535  | 5.00E-05 | 0.00170056 |
| NM_005213.3    | 1475        | CSTA     | 828   | 39.4759  | 10.0048  | 1.98029   | 5.00E-05 | 0.00170056 |
| TCONS_00000209 | XLOC_000044 | -        | 4800  | 0.466131 | 1.8116   | -1.95846  | 5.00E-05 | 0.00170056 |
| NM_006398.3    | 10537       | UBD      | 990   | 152.781  | 20.3812  | 2.90616   | 5.00E-05 | 0.00170056 |
| NM_138636.4    | 51311       | TLR8     | 4216  | 9.59225  | 2.54637  | 1.91343   | 5.00E-05 | 0.00170056 |
| NM_153183.2    | 170685      | NUDT10   | 2001  | 13.0267  | 3.37292  | 1.9494    | 5.00E-05 | 0.00170056 |
| NM_002432.1    | 4332        | MNDA     | 1667  | 39.4322  | 13.1432  | 1.58506   | 5.00E-05 | 0.00170056 |
| NM_001040058.1 | 6696        | SPP1     | 1625  | 13.1633  | 102.889  | -2.9665   | 5.00E-05 | 0.00170056 |
| NM_013250.2    | 7762        | ZNF215   | 3658  | 10.744   | 2.64557  | 2.02188   | 5.00E-05 | 0.00170056 |
| NM_001010922.2 | 440603      | BCL2L15  | 4973  | 6.0172   | 1.73169  | 1.79691   | 5.00E-05 | 0.00170056 |
| NM_000217.2    | 3736        | KCNA1    | 7983  | 0.525153 | 2.53179  | -2.26935  | 5.00E-05 | 0.00170056 |
| NM_001156474.1 | 60494       | CCDC81   | 2781  | 3.25861  | 13.5553  | -2.05652  | 5.00E-05 | 0.00170056 |
| NM_001127380.2 | 6289        | SAA2     | 2043  | 45.6897  | 2.2202   | 4.36311   | 5.00E-05 | 0.00170056 |
| TCONS_00249239 | XLOC_021575 | -        | 5196  | 0.433597 | 2.92079  | -2.75194  | 5.00E-05 | 0.00170056 |
| NM_002229.2    | 3726        | JUNB     | 1816  | 27.4683  | 12.9681  | 1.0828    | 5.00E-05 | 0.00170056 |
| NM_001080427.1 | 80731       | THSD7B   | 5846  | 0.298006 | 2.51427  | -3.07673  | 5.00E-05 | 0.00170056 |

|                |             |           |       |          |          |          |          |            |
|----------------|-------------|-----------|-------|----------|----------|----------|----------|------------|
| NM_006636.3    | 10797       | MTHFD2    | 2188  | 22.7176  | 8.87822  | 1.35547  | 5.00E-05 | 0.00170056 |
| NM_001944.2    | 1830        | DSG3      | 5551  | 3.93888  | 1.05254  | 1.9039   | 5.00E-05 | 0.00170056 |
| NM_015364.4    | 23643       | LY96      | 622   | 42.3746  | 11.2909  | 1.90804  | 5.00E-05 | 0.00170056 |
| NM_002460.3    | 3662        | IRF4      | 5327  | 16.4181  | 3.36478  | 2.2867   | 5.00E-05 | 0.00170056 |
| NM_002164.5    | 3620        | IDO1      | 1931  | 102.462  | 7.64251  | 3.7449   | 5.00E-05 | 0.00170056 |
| NM_144717.3    | 53833       | IL20RB    | 2047  | 11.4139  | 3.4085   | 1.74358  | 5.00E-05 | 0.00170056 |
| NM_001911.2    | 1511        | CTSG      | 924   | 19.4127  | 6.01945  | 1.6893   | 5.00E-05 | 0.00170056 |
| NM_024574.3    | 79625       | NDNF      | 2871  | 2.32929  | 12.2793  | -2.39826 | 5.00E-05 | 0.00170056 |
| NM_000526.4    | 3861        | KRT14     | 1636  | 9.3015   | 0.611884 | 3.92613  | 5.00E-05 | 0.00170056 |
| NM_005566.3    | 3939        | LDHA      | 2208  | 195.49   | 77.9652  | 1.32619  | 5.00E-05 | 0.00170056 |
| NM_030926.4    | 81618       | ITM2C     | 2073  | 57.9318  | 24.8347  | 1.222    | 5.00E-05 | 0.00170056 |
| NM_007350.3    | 22822       | PHLDA1    | 5913  | 14.7214  | 5.7379   | 1.35932  | 5.00E-05 | 0.00170056 |
| NM_001554.4    | 3491        | CYR61     | 2295  | 33.3372  | 13.7271  | 1.2801   | 5.00E-05 | 0.00170056 |
| TCONS_00137738 | XLOC_011479 | -         | 1463  | 1.75389  | 5.56089  | -1.66476 | 5.00E-05 | 0.00170056 |
| NM_001122679.1 | 57451       | ODZ2      | 9645  | 0.666911 | 1.98435  | -1.5731  | 5.00E-05 | 0.00170056 |
| NM_000112.3    | 1836        | SLC26A2   | 8075  | 71.5924  | 22.1299  | 1.69381  | 5.00E-05 | 0.00170056 |
| NM_004363.2    | 1048        | CEACAM5   | 3600  | 12.0636  | 0.671976 | 4.16611  | 5.00E-05 | 0.00170056 |
| NM_000441.1    | 5172        | SLC26A4   | 4930  | 23.743   | 1.16855  | 4.34471  | 5.00E-05 | 0.00170056 |
| NM_024817.2    | 79875       | THSD4     | 9145  | 17.6737  | 46.0633  | -1.38202 | 5.00E-05 | 0.00170056 |
| NM_007199.2    | 11213       | IRAK3     | 8344  | 25.5484  | 12.1384  | 1.07366  | 5.00E-05 | 0.00170056 |
| NM_003955.3    | 9021        | SOCS3     | 2734  | 15.2486  | 3.55188  | 2.10202  | 5.00E-05 | 0.00170056 |
| NM_032505.2    | 84541       | KBTBD8    | 4684  | 6.50356  | 3.00515  | 1.11379  | 5.00E-05 | 0.00170056 |
| NM_002974.2    | 6318        | SERPINB4  | 1719  | 94.5907  | 3.23896  | 4.86809  | 5.00E-05 | 0.00170056 |
| TCONS_00084037 | XLOC_006761 | -         | 5365  | 1.77578  | 0.522978 | 1.76363  | 5.00E-05 | 0.00170056 |
| NM_001135254.1 | 5081        | PAX7      | 6053  | 2.94581  | 0.381149 | 2.95024  | 5.00E-05 | 0.00170056 |
| NM_001098816.2 | 26011       | ODZ4      | 13548 | 1.70121  | 4.08818  | -1.26489 | 5.00E-05 | 0.00170056 |
| TCONS_00087575 | XLOC_007492 | -         | 3315  | 0.228634 | 1.27903  | -2.48393 | 5.00E-05 | 0.00170056 |
| NM_004994.2    | 4318        | MMP9      | 2336  | 4.45143  | 14.5385  | -1.70753 | 5.00E-05 | 0.00170056 |
| NM_001033602.2 | 23281       | MTUS2     | 6939  | 0.311843 | 1.43098  | -2.19812 | 5.00E-05 | 0.00170056 |
| NM_002120.3    | 3112        | HLA-DOB   | 1372  | 13.5204  | 4.28167  | 1.65889  | 5.00E-05 | 0.00170056 |
| NM_001870.2    | 1359        | CPA3      | 1686  | 74.1552  | 36.5306  | 1.02144  | 5.00E-05 | 0.00170056 |
| NM_013381.2    | 29953       | TRHDE     | 5552  | 0.875037 | 3.75703  | -2.10218 | 5.00E-05 | 0.00170056 |
| NM_152754.2    | 223117      | SEMA3D    | 6261  | 29.9333  | 12.4977  | 1.26009  | 5.00E-05 | 0.00170056 |
| NM_005564.3    | 3934        | LCN2      | 822   | 603.048  | 99.7193  | 2.59633  | 5.00E-05 | 0.00170056 |
| NM_020406.2    | 57126       | CD177     | 2364  | 13.8532  | 1.36081  | 3.34768  | 5.00E-05 | 0.00170056 |
| NM_182658.1    | 359710      | C20orf185 | 1454  | 14.108   | 3.4163   | 2.04601  | 5.00E-05 | 0.00170056 |
| NM_007231.3    | 11254       | SLC6A14   | 4564  | 59.3198  | 29.2591  | 1.01963  | 5.00E-05 | 0.00170056 |
| NM_000965.3    | 5915        | RARB      | 3052  | 14.7021  | 28.7589  | -0.96799 | 5.00E-05 | 0.00170056 |
| NM_018950.2    | 3134        | HLA-F     | 1284  | 91.3257  | 36.2195  | 1.33425  | 5.00E-05 | 0.00170056 |
| NM_001218.3    | 771         | CA12      | 3975  | 27.1506  | 3.83575  | 2.8234   | 5.00E-05 | 0.00170056 |
| NM_014737.2    | 9770        | RASSF2    | 5426  | 25.4755  | 12.0377  | 1.08155  | 5.00E-05 | 0.00170056 |
| TCONS_00053981 | XLOC_004304 | -         | 6951  | 2.05471  | 0.590623 | 1.79863  | 5.00E-05 | 0.00170056 |
| NM_003667.2    | 8549        | LGR5      | 2880  | 0.522087 | 2.83296  | -2.43995 | 5.00E-05 | 0.00170056 |
| NM_014256.3    | 10331       | B3GNT3    | 2720  | 6.00884  | 1.93042  | 1.63818  | 5.00E-05 | 0.00170056 |
| NM_000478.4    | 249         | ALPL      | 2596  | 3.94506  | 9.76129  | -1.30702 | 5.00E-05 | 0.00170056 |
| NM_003226.3    | 7033        | TFF3      | 1054  | 64.5205  | 17.8191  | 1.85634  | 5.00E-05 | 0.00170056 |
| TCONS_00202192 | XLOC_017222 | -         | 11403 | 3.37722  | 9.68556  | -1.52    | 5.00E-05 | 0.00170056 |
| NM_025195.2    | 10221       | TRIB1     | 3633  | 19.9818  | 7.00342  | 1.51256  | 5.00E-05 | 0.00170056 |
| NM_002994.3    | 6374        | CXCL5     | 2458  | 3.02738  | 0.43758  | 2.79045  | 5.00E-05 | 0.00170056 |
| NM_152997.2    | 260436      | C4orf7    | 539   | 600.743  | 19.3682  | 4.95499  | 5.00E-05 | 0.00170056 |
| NM_014080.4    | 50506       | DUOX2     | 6346  | 3.22798  | 0.336585 | 3.26159  | 5.00E-05 | 0.00170056 |
| NM_000720.2    | 776         | CACNA1D   | 7768  | 2.20781  | 8.05376  | -1.86704 | 5.00E-05 | 0.00170056 |
| NM_000570.3    | 2215        | FCGR3B    | 2295  | 12.5334  | 4.60318  | 1.44507  | 5.00E-05 | 0.00170056 |
| TCONS_00160811 | XLOC_013647 | -         | 2061  | 4.6873   | 1.11116  | 2.0767   | 5.00E-05 | 0.00170056 |

|                |             |          |       |          |          |          |          |            |
|----------------|-------------|----------|-------|----------|----------|----------|----------|------------|
| TCONS_00267790 | XLOC_022887 | -        | 1986  | 0.426526 | 4.46003  | -3.38635 | 5.00E-05 | 0.00170056 |
| NM_000963.2    | 5743        | PTGS2    | 4493  | 15.1943  | 2.13877  | 2.82868  | 5.00E-05 | 0.00170056 |
| NM_002458.2    | 727897      | MUC5B    | 17916 | 33.8068  | 7.31359  | 2.20866  | 5.00E-05 | 0.00170056 |
| NM_005130.3    | 9982        | FGFBP1   | 1182  | 4.68987  | 0.744421 | 2.65536  | 5.00E-05 | 0.00170056 |
| NM_012309.3    | 22941       | SHANK2   | 10495 | 1.83589  | 4.74797  | -1.37083 | 5.00E-05 | 0.00170056 |
| NM_012108.2    | 26228       | STAP1    | 1511  | 14.2708  | 5.70392  | 1.32304  | 5.00E-05 | 0.00170056 |
| NM_000922.3    | 5140        | PDE3B    | 6091  | 9.26319  | 2.87868  | 1.6861   | 5.00E-05 | 0.00170056 |
| NM_018004.1    | 55076       | TMEM45A  | 1564  | 38.1525  | 4.70917  | 3.01823  | 5.00E-05 | 0.00170056 |
| NM_003357.4    | 7356        | SCGB1A1  | 452   | 20.9764  | 2998.95  | -7.15955 | 5.00E-05 | 0.00170056 |
| NM_000602.3    | 5054        | SERPINE1 | 3181  | 4.26985  | 0.726664 | 2.55482  | 5.00E-05 | 0.00170056 |
| NM_130853.2    | 5802        | PTPRS    | 6006  | 5.94949  | 15.0599  | -1.33988 | 5.00E-05 | 0.00170056 |
| NM_002090.2    | 2921        | CXCL3    | 1159  | 4.80877  | 0.313661 | 3.93839  | 5.00E-05 | 0.00170056 |
| NM_000189.4    | 3099        | HK2      | 7093  | 7.87652  | 2.62488  | 1.58531  | 5.00E-05 | 0.00170056 |
| NM_000237.2    | 4023        | LPL      | 3747  | 7.22783  | 2.70361  | 1.41868  | 5.00E-05 | 0.00170056 |
| NM_016459.3    | 51237       | MZB1     | 827   | 95.5045  | 25.3635  | 1.91282  | 5.00E-05 | 0.00170056 |
| NM_030764.3    | 79368       | FCRL2    | 2589  | 4.58836  | 0.984152 | 2.22102  | 5.00E-05 | 0.00170056 |
| NM_173812.4    | 283417      | DPY19L2  | 4057  | 1.55026  | 8.58391  | -2.46912 | 5.00E-05 | 0.00170056 |
| NM_000474.3    | 7291        | TWIST1   | 1666  | 19.1523  | 42.654   | -1.15516 | 5.00E-05 | 0.00170056 |
| NM_014361.2    | 53942       | CNTN5    | 4164  | 5.83789  | 0.592407 | 3.30078  | 5.00E-05 | 0.00170056 |
| NM_005623.2    | 6355        | CCL8     | 1250  | 6.99974  | 1.16458  | 2.5875   | 5.00E-05 | 0.00170056 |
| NM_001001557.2 | 392255      | GDF6     | 3701  | 0.214651 | 1.32606  | -2.62708 | 5.00E-05 | 0.00170056 |
| NM_002116.7    | 3105        | HLA-A    | 1611  | 560.15   | 198.985  | 1.49315  | 5.00E-05 | 0.00170056 |
| NM_020183.3    | 56938       | ARNTL2   | 1930  | 9.51237  | 3.62337  | 1.39247  | 5.00E-05 | 0.00170056 |
| NM_199161.3    | 6288        | SAA1     | 531   | 405.123  | 22.2964  | 4.18348  | 5.00E-05 | 0.00170056 |
| NM_030754.4    | 6289        | SAA2     | 594   | 160.834  | 3.86528  | 5.37886  | 5.00E-05 | 0.00170056 |
| NM_001184744.1 | 5745        | PTH1R    | 1991  | 1.56498  | 6.44491  | -2.04202 | 5.00E-05 | 0.00170056 |
| NM_005532.3    | 3429        | IFI27    | 652   | 171.702  | 65.0863  | 1.39948  | 5.00E-05 | 0.00170056 |
| NM_015515.3    | 25984       | KRT23    | 2147  | 48.4544  | 10.4588  | 2.21191  | 5.00E-05 | 0.00170056 |
| TCONS_00087932 | XLOC_007810 | -        | 4484  | 0.471366 | 1.99556  | -2.08187 | 5.00E-05 | 0.00170056 |
| NM_007226.2    | 11249       | NXPH2    | 2560  | 9.77365  | 1.81471  | 2.42916  | 5.00E-05 | 0.00170056 |
| TCONS_00208641 | XLOC_017561 | -        | 1790  | 4.55605  | 1.14283  | 1.99517  | 5.00E-05 | 0.00170056 |
| NM_024677.4    | 79730       | NSUN7    | 3698  | 9.58667  | 21.2879  | -1.15094 | 5.00E-05 | 0.00170056 |
| NM_001783.3    | 973         | CD79A    | 1258  | 62.0491  | 10.9739  | 2.49933  | 5.00E-05 | 0.00170056 |
| NM_030761.4    | 54361       | WNT4     | 3905  | 1.6174   | 6.4267   | -1.9904  | 5.00E-05 | 0.00170056 |
| NM_021237.3    | 58515       | SELK     | 818   | 60.4969  | 26.596   | 1.18565  | 5.00E-05 | 0.00170056 |
| NM_003263.3    | 7096        | TLR1     | 2851  | 23.8167  | 12.0264  | 0.985766 | 5.00E-05 | 0.00170056 |
| NM_021073.2    | 653         | BMP5     | 2172  | 28.3511  | 9.13111  | 1.63454  | 5.00E-05 | 0.00170056 |
| NM_002133.2    | 3162        | HMOX1    | 1590  | 11.0675  | 4.10273  | 1.43167  | 5.00E-05 | 0.00170056 |
| NM_004484.3    | 2719        | GPC3     | 2319  | 2.08326  | 7.05285  | -1.75936 | 5.00E-05 | 0.00170056 |
| TCONS_00075737 | XLOC_006473 | -        | 4288  | 1.71035  | 5.77918  | -1.75657 | 5.00E-05 | 0.00170056 |
| NM_025220.2    | 80332       | ADAM33   | 3519  | 4.10709  | 10.1957  | -1.31178 | 5.00E-05 | 0.00170056 |
| NM_007191.4    | 11197       | WIF1     | 2240  | 0.430398 | 3.76249  | -3.12794 | 5.00E-05 | 0.00170056 |
| NM_000669.3    | 126         | ADH1C    | 1473  | 52.9387  | 106.534  | -1.00893 | 5.00E-05 | 0.00170056 |
| NM_006039.3    | 9902        | MRC2     | 5983  | 13.9776  | 31.3635  | -1.16597 | 5.00E-05 | 0.00170056 |
| NM_003116.1    | 6676        | SPAG4    | 1452  | 5.87019  | 1.32174  | 2.15097  | 5.00E-05 | 0.00170056 |
| NM_004227.3    | 9265        | CYTH3    | 4469  | 11.8152  | 23.9407  | -1.01882 | 5.00E-05 | 0.00170056 |
| NM_018456.4    | 55840       | EAF2     | 1020  | 35.4981  | 13.1116  | 1.4369   | 5.00E-05 | 0.00170056 |
| NM_006207.2    | 5157        | PDGFRL   | 1905  | 5.04637  | 12.6782  | -1.32904 | 5.00E-05 | 0.00170056 |
| NM_006103.3    | 10406       | WFDC2    | 566   | 395.577  | 93.0004  | 2.08865  | 5.00E-05 | 0.00170056 |
| NM_001085384.1 | 7710        | ZNF154   | 2747  | 3.6318   | 10.2001  | -1.48982 | 5.00E-05 | 0.00170056 |
| NM_020801.2    | 57561       | ARRDC3   | 4161  | 105.071  | 54.3784  | 0.950254 | 5.00E-05 | 0.00170056 |
| NM_006486.2    | 2192        | FBLN1    | 2947  | 47.6831  | 122.745  | -1.36412 | 5.00E-05 | 0.00170056 |
| NM_000093.3    | 1289        | COL5A1   | 8439  | 9.28306  | 19.7935  | -1.09235 | 5.00E-05 | 0.00170056 |
| NM_006274.2    | 6363        | CCL19    | 684   | 26.5221  | 7.33818  | 1.8537   | 5.00E-05 | 0.00170056 |

|                |             |          |       |          |          |          |          |            |
|----------------|-------------|----------|-------|----------|----------|----------|----------|------------|
| NM_002427.3    | 4322        | MMP13    | 2719  | 0.879573 | 159.113  | -7.49903 | 5.00E-05 | 0.00170056 |
| NM_001565.3    | 3627        | CXCL10   | 1216  | 82.0924  | 16.4535  | 2.31886  | 5.00E-05 | 0.00170056 |
| NM_153490.2    | 3860        | KRT13    | 1715  | 6.46307  | 0.675297 | 3.25863  | 5.00E-05 | 0.00170056 |
| NM_005764.3    | 10158       | PDZK1IP1 | 894   | 11.4724  | 1.55138  | 2.88655  | 5.00E-05 | 0.00170056 |
| TCONS_00233089 | XLOC_020133 | -        | 2857  | 0.841336 | 3.05482  | -1.86033 | 5.00E-05 | 0.00170056 |
| NM_033119.4    | 85407       | NKD1     | 8716  | 3.15174  | 8.38439  | -1.41156 | 5.00E-05 | 0.00170056 |
| NM_144575.2    | 92291       | CAPN13   | 2682  | 85.7017  | 35.4882  | 1.27199  | 5.00E-05 | 0.00170056 |
| NM_001124.1    | 133         | ADM      | 1449  | 10.1365  | 2.81998  | 1.8458   | 5.00E-05 | 0.00170056 |
| NM_197955.1    | 84419       | C15orf48 | 803   | 26.0488  | 1.50857  | 4.10997  | 5.00E-05 | 0.00170056 |
| NM_032532.2    | 84624       | FNDC1    | 6551  | 1.0843   | 4.36865  | -2.01042 | 5.00E-05 | 0.00170056 |
| NM_130830.4    | 131578      | LRRC15   | 5883  | 0.527111 | 4.55081  | -3.10995 | 5.00E-05 | 0.00170056 |
| NM_133459.3    | 147372      | CCBE1    | 6260  | 0.319426 | 3.31121  | -3.37381 | 5.00E-05 | 0.00170056 |
| NM_006406.1    | 10549       | PRDX4    | 921   | 86.3149  | 34.3174  | 1.33067  | 5.00E-05 | 0.00170056 |
| NM_001010919.1 | 441168      | FAM26F   | 1109  | 23.2319  | 8.11979  | 1.5166   | 5.00E-05 | 0.00170056 |
| TCONS_00053726 | XLOC_003947 | -        | 4699  | 2.40073  | 7.38542  | -1.62121 | 5.00E-05 | 0.00170056 |
| NM_006235.2    | 5450        | POU2AF1  | 3032  | 9.3752   | 3.01664  | 1.6359   | 5.00E-05 | 0.00170056 |
| NM_005554.3    | 3853        | KRT6A    | 2450  | 12.5934  | 1.69885  | 2.89004  | 5.00E-05 | 0.00170056 |
| NM_000063.4    | 717         | C2       | 2838  | 21.2954  | 7.39082  | 1.52673  | 5.00E-05 | 0.00170056 |
| NM_173701.1    | 7453        | WARS     | 2660  | 71.0735  | 22.9934  | 1.62809  | 5.00E-05 | 0.00170056 |
| NM_002993.3    | 6372        | CXCL6    | 1659  | 16.9881  | 4.18377  | 2.02165  | 5.00E-05 | 0.00170056 |
| NM_000343.3    | 6523        | SLC5A1   | 5061  | 4.11193  | 0.800905 | 2.36011  | 5.00E-05 | 0.00170056 |
| NM_015907.2    | 51056       | LAP3     | 2100  | 135.428  | 55.0969  | 1.29749  | 5.00E-05 | 0.00170056 |
| NM_014479.3    | 27299       | ADAMDEC1 | 2348  | 32.8639  | 3.18629  | 3.36655  | 5.00E-05 | 0.00170056 |
| NM_145793.3    | 2674        | GFRA1    | 9134  | 7.77643  | 27.8384  | -1.8399  | 5.00E-05 | 0.00170056 |
| NM_000313.3    | 5627        | PROS1    | 3580  | 20.8197  | 60.5745  | -1.54076 | 5.00E-05 | 0.00170056 |
| NM_005651.2    | 6999        | TDO2     | 1693  | 3.39385  | 0.56747  | 2.58031  | 5.00E-05 | 0.00170056 |
| NM_002704.3    | 5473        | PPBP     | 1307  | 0.9285   | 5.13818  | -2.46828 | 5.00E-05 | 0.00170056 |
| NM_005218.3    | 1672        | DEFB1    | 463   | 46.4878  | 7.04696  | 2.72178  | 5.00E-05 | 0.00170056 |
| NM_001007156.1 | 4916        | NTRK3    | 3982  | 1.87484  | 6.62195  | -1.82049 | 5.00E-05 | 0.00170056 |
| NM_020974.2    | 57758       | SCUBE2   | 4536  | 1.92054  | 6.48128  | -1.75476 | 5.00E-05 | 0.00170056 |
| NM_001002235.2 | 5265        | SERPINA1 | 3199  | 17.1309  | 4.31088  | 1.99055  | 5.00E-05 | 0.00170056 |
| NM_032119.3    | 84059       | GPR98    | 19333 | 4.91004  | 18.2589  | -1.89479 | 5.00E-05 | 0.00170056 |
| NM_001977.3    | 2028        | ENPEP    | 4995  | 13.6196  | 27.588   | -1.01836 | 5.00E-05 | 0.00170056 |
| NM_001002029.3 | 721         | C4B      | 5427  | 3.28823  | 1.1247   | 1.54777  | 5.00E-05 | 0.00170056 |
| NM_001814.4    | 1075        | CTSC     | 1907  | 147.917  | 63.5718  | 1.21833  | 5.00E-05 | 0.00170056 |
| NM_001039.3    | 6340        | SCNN1G   | 3499  | 8.62819  | 1.69514  | 2.34766  | 5.00E-05 | 0.00170056 |
| NM_002029.3    | 2357        | FPR1     | 1317  | 17.3148  | 2.93228  | 2.56191  | 5.00E-05 | 0.00170056 |
| NM_004655.3    | 8313        | AXIN2    | 4234  | 7.79652  | 20.4522  | -1.39135 | 5.00E-05 | 0.00170056 |
| NM_001145026.1 | 374462      | PTPRQ    | 7612  | 0.614365 | 2.31692  | -1.91504 | 5.00E-05 | 0.00170056 |
| NM_006573.4    | 10673       | TNFSF13B | 2671  | 14.1867  | 4.04337  | 1.8109   | 5.00E-05 | 0.00170056 |
| NM_153362.2    | 167681      | PRSS35   | 2503  | 1.60902  | 5.56998  | -1.79149 | 5.00E-05 | 0.00170056 |
| NM_001623.3    | 199         | AIF1     | 639   | 89.5452  | 32.3159  | 1.47037  | 5.00E-05 | 0.00170056 |
| NM_020872.1    | 5067        | CNTN3    | 4997  | 1.99485  | 7.85864  | -1.978   | 5.00E-05 | 0.00170056 |
| NM_003264.3    | 7097        | TLR2     | 3403  | 23.0616  | 10.5935  | 1.12231  | 5.00E-05 | 0.00170056 |
| NM_001195811.1 | 200150      | PLD5     | 3018  | 0.576669 | 7.00164  | -3.60188 | 5.00E-05 | 0.00170056 |
| NM_148919.3    | 5696        | PSMB8    | 1116  | 91.0255  | 40.1837  | 1.17966  | 5.00E-05 | 0.00170056 |
| NM_001884.3    | 1404        | HAPLN1   | 4678  | 0.565044 | 6.04425  | -3.41913 | 5.00E-05 | 0.00170056 |
| NM_025153.2    | 23120       | ATP10B   | 7566  | 10.5547  | 0.633624 | 4.05811  | 5.00E-05 | 0.00170056 |
| TCONS_00154706 | XLOC_014975 | -        | 16334 | 2.58297  | 6.16537  | -1.25516 | 5.00E-05 | 0.00170056 |
| NM_001080534.1 | 440279      | UNC13C   | 8140  | 1.09559  | 4.96343  | -2.17963 | 5.00E-05 | 0.00170056 |
| NM_022073.3    | 112399      | EGLN3    | 2722  | 40.2903  | 6.64     | 2.60118  | 5.00E-05 | 0.00170056 |
| NM_002922.3    | 5996        | RGS1     | 1403  | 67.9109  | 19.2747  | 1.81694  | 5.00E-05 | 0.00170056 |
| NM_004675.2    | 9077        | DIRAS3   | 1631  | 10.8335  | 2.58486  | 2.06734  | 5.00E-05 | 0.00170056 |
| NM_174975.4    | 266629      | SEC14L3  | 2084  | 1.07783  | 54.4952  | -5.65992 | 5.00E-05 | 0.00170056 |

|                |             |          |       |          |          |           |          |            |
|----------------|-------------|----------|-------|----------|----------|-----------|----------|------------|
| NM_006183.4    | 4922        | NTS      | 1239  | 0.853768 | 20.3172  | -4.57272  | 5.00E-05 | 0.00170056 |
| NM_004065.2    | 1038        | CDR1     | 1299  | 3.38912  | 40.7513  | -3.58786  | 5.00E-05 | 0.00170056 |
| NM_001105248.1 | 79838       | TMC5     | 4917  | 72.1613  | 33.7987  | 1.09426   | 5.00E-05 | 0.00170056 |
| NM_005978.3    | 6273        | S100A2   | 963   | 90.9409  | 23.2854  | 1.9655    | 5.00E-05 | 0.00170056 |
| NM_024329.5    | 79180       | EFHD2    | 2419  | 25.4191  | 12.1345  | 1.0668    | 5.00E-05 | 0.00170056 |
| NM_005114.2    | 9957        | HS3ST1   | 1965  | 23.8248  | 6.63289  | 1.84476   | 5.00E-05 | 0.00170056 |
| 28526          | 28526       | -        | 1510  | 7.67714  | 2.50311  | 1.61685   | 5.00E-05 | 0.00170056 |
| 3494           | 3494        | -        | 1019  | 766.09   | 93.4102  | 3.03586   | 5.00E-05 | 0.00170056 |
| NM_002800.4    | 5698        | PSMB9    | 1048  | 63.8106  | 25.5587  | 1.31998   | 5.00E-05 | 0.00170056 |
| NM_002423.3    | 4316        | MMP7     | 1119  | 110.857  | 9.53539  | 3.53927   | 5.00E-05 | 0.00170056 |
| NM_005763.3    | 10157       | AASS     | 5871  | 21.0205  | 40.6068  | -0.949921 | 5.00E-05 | 0.00170056 |
| NM_198285.2    | 349136      | WDR86    | 2041  | 6.01338  | 25.095   | -2.06115  | 5.00E-05 | 0.00170056 |
| NM_024721.4    | 79776       | ZFHx4    | 13958 | 3.57141  | 9.54205  | -1.4178   | 5.00E-05 | 0.00170056 |
| NM_021127.2    | 5366        | PMAIP1   | 1936  | 9.03686  | 3.30606  | 1.45071   | 5.00E-05 | 0.00170056 |
| NM_001447.2    | 2196        | FAT2     | 14536 | 8.4315   | 16.6754  | -0.98386  | 5.00E-05 | 0.00170056 |
| NM_024422.3    | 1824        | DSC2     | 5199  | 6.96374  | 2.49327  | 1.48182   | 5.00E-05 | 0.00170056 |
| NM_012301.3    | 9863        | MAGI2    | 6880  | 3.06891  | 6.31978  | -1.04215  | 5.00E-05 | 0.00170056 |
| TCONS_00293562 | XLOC_025465 | -        | 11650 | 0.845853 | 3.32453  | -1.97467  | 5.00E-05 | 0.00170056 |
| NM_173354.3    | 150094      | SIK1     | 4706  | 14.1567  | 4.40303  | 1.68492   | 5.00E-05 | 0.00170056 |
| NM_001099677.1 | 57604       | KIAA1456 | 9300  | 3.90013  | 9.92966  | -1.34822  | 5.00E-05 | 0.00170056 |
| NM_001101312.1 | 28959       | TMEM176B | 1298  | 51.8125  | 19.574   | 1.40436   | 5.00E-05 | 0.00170056 |
| NM_006269.1    | 6101        | RP1      | 7100  | 8.64943  | 18.6022  | -1.1048   | 5.00E-05 | 0.00170056 |
| NM_001558.3    | 3587        | IL10RA   | 3656  | 23.2529  | 8.54456  | 1.44433   | 5.00E-05 | 0.00170056 |
| NM_005252.3    | 2353        | FOS      | 2158  | 44.4     | 7.21553  | 2.62138   | 5.00E-05 | 0.00170056 |
| NM_003026.2    | 6456        | SH3GL2   | 2728  | 0.176579 | 1.60812  | -3.18699  | 5.00E-05 | 0.00170056 |
| NM_000576.2    | 3553        | IL1B     | 1498  | 3.9513   | 0.462931 | 3.09346   | 5.00E-05 | 0.00170056 |
| NM_030810.3    | 81567       | TXNDC5   | 3231  | 328.051  | 108.516  | 1.59601   | 5.00E-05 | 0.00170056 |
| NM_002457.2    | 4583        | MUC2     | 8623  | 1.72799  | 0.208277 | 3.05252   | 5.00E-05 | 0.00170056 |
| NM_000766.3    | 1553        | CYP2A13  | 1747  | 4.96824  | 19.9971  | -2.00899  | 5.00E-05 | 0.00170056 |
| NM_015419.3    | 25878       | MXRA5    | 9795  | 18.1292  | 60.3428  | -1.73487  | 5.00E-05 | 0.00170056 |
| NM_006875.3    | 11040       | PIM2     | 2187  | 52.7422  | 7.95323  | 2.72935   | 5.00E-05 | 0.00170056 |
| NM_153221.2    | 148113      | CILP2    | 4199  | 0.229136 | 2.31852  | -3.33893  | 5.00E-05 | 0.00170056 |
| NM_021103.3    | 9168        | TMSB10   | 482   | 1339.84  | 601.074  | 1.15645   | 5.00E-05 | 0.00170056 |
| NM_020848.2    | 57608       | KIAA1462 | 9300  | 6.01114  | 21.0118  | -1.80549  | 5.00E-05 | 0.00170056 |
| NM_001085.4    | 12          | SERPINA3 | 1590  | 89.048   | 14.9471  | 2.57471   | 5.00E-05 | 0.00170056 |
| NM_003013.2    | 6423        | SFRP2    | 1990  | 214.651  | 83.2395  | 1.36665   | 5.00E-05 | 0.00170056 |
| NM_019105.6    | 7148        | TNxB     | 13125 | 0.876743 | 2.48924  | -1.50548  | 5.00E-05 | 0.00170056 |
| NM_024893.1    | 79953       | SYNDIG1  | 2437  | 2.4692   | 0.447981 | 2.46254   | 5.00E-05 | 0.00170056 |
| NM_002089.3    | 2920        | CXCL2    | 1205  | 6.53973  | 1.4232   | 2.20009   | 5.00E-05 | 0.00170056 |
| NM_000949.5    | 5618        | PRLR     | 11817 | 3.93311  | 15.3758  | -1.96692  | 5.00E-05 | 0.00170056 |
| NM_024592.4    | 79644       | SRD5A3   | 4082  | 10.7479  | 4.77954  | 1.16911   | 5.00E-05 | 0.00170056 |
| NM_014584.1    | 30001       | ERO1L    | 3310  | 62.8114  | 28.498   | 1.14016   | 5.00E-05 | 0.00170056 |
| NM_001442.2    | 2167        | FABP4    | 838   | 3.9004   | 34.3176  | -3.13725  | 5.00E-05 | 0.00170056 |
| NM_001974.3    | 2015        | EMR1     | 3123  | 1.82071  | 0.317868 | 2.518     | 5.00E-05 | 0.00170056 |
| NM_013231.4    | 23768       | FLRT2    | 7179  | 10.6433  | 25.2854  | -1.24836  | 5.00E-05 | 0.00170056 |
| NM_006010.4    | 7873        | MANF     | 939   | 68.3469  | 30.5012  | 1.16401   | 5.00E-05 | 0.00170056 |
| NM_021978.3    | 6768        | ST14     | 3300  | 23.342   | 12.0487  | 0.954054  | 5.00E-05 | 0.00170056 |
| TCONS_00062536 | XLOC_005694 | -        | 16273 | 6.33767  | 2.13204  | 1.57171   | 5.00E-05 | 0.00170056 |
| NM_138426.2    | 113263      | GLCC11   | 4745  | 17.5286  | 7.93569  | 1.14328   | 5.00E-05 | 0.00170056 |
| NM_005065.4    | 6400        | SEL1L    | 6579  | 100.92   | 40.679   | 1.31086   | 5.00E-05 | 0.00170056 |
| NM_012128.3    | 22802       | CLCA4    | 3213  | 9.70005  | 0.856218 | 3.50194   | 5.00E-05 | 0.00170056 |
| NM_080283.3    | 10350       | ABCA9    | 6301  | 4.62366  | 10.4484  | -1.17618  | 5.00E-05 | 0.00170056 |
| NM_002426.4    | 4321        | MMP12    | 1876  | 8.25199  | 0.966055 | 3.09456   | 5.00E-05 | 0.00170056 |
| NM_031457.1    | 83661       | MS4A8B   | 1353  | 37.2902  | 72.4867  | -0.95892  | 5.00E-05 | 0.00170056 |

|                |           |          |       |          |          |          |          |            |
|----------------|-----------|----------|-------|----------|----------|----------|----------|------------|
| NM_000573.3    | 1378      | CR1      | 8616  | 6.72801  | 1.75544  | 1.93835  | 5.00E-05 | 0.00170056 |
| NM_003469.4    | 7857      | SCG2     | 2572  | 83.0054  | 20.8374  | 1.99403  | 5.00E-05 | 0.00170056 |
| NM_000379.3    | 7498      | XDH      | 5717  | 6.25099  | 1.36851  | 2.19148  | 5.00E-05 | 0.00170056 |
| NM_001012502.2 | 286207    | C9orf117 | 1722  | 11.108   | 28.102   | -1.33907 | 5.00E-05 | 0.00170056 |
| NM_000574.3    | 1604      | CD55     | 2796  | 94.4863  | 21.4055  | 2.14212  | 5.00E-05 | 0.00170056 |
| NM_000782.4    | 1591      | CYP24A1  | 3266  | 17.0522  | 2.81343  | 2.59956  | 5.00E-05 | 0.00170056 |
| NM_001178126.1 | 100423062 | IGLL5    | 1059  | 689.764  | 142.043  | 2.27977  | 5.00E-05 | 0.00170056 |
| NM_014302.3    | 23480     | SEC61G   | 466   | 180.896  | 77.2675  | 1.22723  | 5.00E-05 | 0.00170056 |
| NM_006948.4    | 6782      | HSPA13   | 3987  | 44.7465  | 19.5935  | 1.1914   | 5.00E-05 | 0.00170056 |
| NM_178527.3    | 284525    | SLC9A11  | 4427  | 1.10057  | 3.02734  | -1.45979 | 5.00E-05 | 0.00170056 |
| NM_004744.3    | 9227      | LRAT     | 4888  | 0.406415 | 7.35898  | -4.17848 | 5.00E-05 | 0.00170056 |
| NM_000694.2    | 221       | ALDH3B1  | 2815  | 13.9328  | 37.5336  | -1.4297  | 5.00E-05 | 0.00170056 |
| NM_001039350.1 | 1804      | DPP6     | 4705  | 0.414929 | 3.57046  | -3.10517 | 5.00E-05 | 0.00170056 |
| NM_001105556.1 | 9473      | C1orf38  | 2723  | 13.0308  | 4.60949  | 1.49925  | 5.00E-05 | 0.00170056 |
| XM_002343299.3 | 319089    | TTC6     | 2913  | 6.07558  | 14.5005  | -1.25501 | 5.00E-05 | 0.00170056 |
| NM_005555.3    | 3854      | KRT6B    | 2282  | 3.19854  | 0.567703 | 2.49421  | 5.00E-05 | 0.00170056 |
| NM_001848.2    | 1291      | COL6A1   | 4225  | 23.3507  | 49.3671  | -1.08008 | 5.00E-05 | 0.00170056 |
| NM_007028.3    | 11074     | TRIM31   | 2027  | 2.91783  | 0.561369 | 2.37788  | 5.00E-05 | 0.00170056 |
| NM_014622.4    | 4013      | VWA5A    | 3422  | 35.852   | 16.2463  | 1.14194  | 5.00E-05 | 0.00170056 |
| NM_138433.3    | 113730    | KLHDC7B  | 2991  | 3.75932  | 0.786473 | 2.257    | 5.00E-05 | 0.00170056 |
| NM_019050.2    | 54532     | USP53    | 6595  | 24.8874  | 91.3625  | -1.87618 | 5.00E-05 | 0.00170056 |
| NM_014331.3    | 23657     | SLC7A11  | 9648  | 2.45937  | 0.862837 | 1.51113  | 5.00E-05 | 0.00170056 |
| NM_001321.1    | 1466      | CSRP2    | 901   | 107.577  | 290.382  | -1.43258 | 5.00E-05 | 0.00170056 |
| NM_198461.3    | 164832    | LONRF2   | 13912 | 2.31864  | 4.91353  | -1.08348 | 5.00E-05 | 0.00170056 |
| NM_017551.2    | 2894      | GRID1    | 5849  | 1.07676  | 3.10595  | -1.52834 | 5.00E-05 | 0.00170056 |
| NM_020130.3    | 56892     | C8orf4   | 1833  | 69.3577  | 15.0847  | 2.20097  | 5.00E-05 | 0.00170056 |
| NM_020802.2    | 57562     | KIAA1377 | 7043  | 9.97199  | 20.8934  | -1.0671  | 5.00E-05 | 0.00170056 |
| NM_002272.3    | 3851      | KRT4     | 2147  | 5.1576   | 19.585   | -1.92498 | 5.00E-05 | 0.00170056 |
| NM_000129.3    | 2162      | F13A1    | 3863  | 145.465  | 50.3977  | 1.52924  | 5.00E-05 | 0.00170056 |
| NM_002416.1    | 4283      | CXCL9    | 2545  | 59.1654  | 12.9622  | 2.19044  | 5.00E-05 | 0.00170056 |
| NM_002053.2    | 2633      | GBP1     | 3050  | 107.536  | 41.1968  | 1.38421  | 5.00E-05 | 0.00170056 |
| NM_002275.3    | 3866      | KRT15    | 1840  | 84.4943  | 40.1227  | 1.07443  | 5.00E-05 | 0.00170056 |
| NM_031311.3    | 54504     | CPVL     | 1691  | 70.0336  | 29.4203  | 1.25124  | 5.00E-05 | 0.00170056 |
| NM_003793.3    | 8722      | CTSF     | 2014  | 16.1762  | 34.152   | -1.0781  | 5.00E-05 | 0.00170056 |
| NM_001099294.1 | 85352     | KIAA1644 | 6741  | 0.920432 | 3.00503  | -1.707   | 5.00E-05 | 0.00170056 |
| NM_052947.3    | 115701    | ALPK2    | 7303  | 6.02987  | 0.905442 | 2.73543  | 5.00E-05 | 0.00170056 |
| NM_022068.2    | 63895     | FAM38B   | 9713  | 2.73723  | 6.50433  | -1.24868 | 5.00E-05 | 0.00170056 |
| NM_033255.2    | 94240     | EPST11   | 1508  | 55.2258  | 25.393   | 1.12091  | 5.00E-05 | 0.00170056 |
| NM_145016.3    | 219970    | GLYATL2  | 1380  | 10.1025  | 0.700837 | 3.84949  | 5.00E-05 | 0.00170056 |
| 3539           | 3539      | -        | 318   | 996.829  | 166.569  | 2.58122  | 5.00E-05 | 0.00170056 |
| 3538           | 3538      | -        | 320   | 1653.31  | 391.077  | 2.07984  | 5.00E-05 | 0.00170056 |
| NM_004106.1    | 2207      | FCER1G   | 591   | 51.6052  | 20.4269  | 1.33705  | 5.00E-05 | 0.00170056 |
| NM_004751.2    | 9245      | GCNT3    | 2222  | 5.7908   | 1.53688  | 1.91376  | 5.00E-05 | 0.00170056 |
| NM_000442.4    | 5175      | PECAM1   | 4449  | 25.6531  | 13.0084  | 0.979693 | 5.00E-05 | 0.00170056 |
| NM_001102608.1 | 131873    | COL6A6   | 8470  | 0.765362 | 2.25225  | -1.55715 | 5.00E-05 | 0.00170056 |
| NM_002664.2    | 5341      | PLEK     | 2852  | 31.5762  | 12.9319  | 1.2879   | 5.00E-05 | 0.00170056 |
| NM_000775.2    | 1573      | CYP2J2   | 1857  | 10.2191  | 25.523   | -1.32053 | 5.00E-05 | 0.00170056 |
| NM_032977.3    | 843       | CASP10   | 5906  | 9.55204  | 4.33585  | 1.13949  | 5.00E-05 | 0.00170056 |
| NM_006674.3    | 10866     | HCP5     | 2539  | 45.6173  | 21.5056  | 1.08487  | 5.00E-05 | 0.00170056 |
| NM_002923.3    | 5997      | RGS2     | 1350  | 49.8778  | 16.1875  | 1.62351  | 5.00E-05 | 0.00170056 |
| NM_213606.3    | 387700    | SLC16A12 | 4622  | 3.4552   | 19.0353  | -2.46183 | 5.00E-05 | 0.00170056 |
| NM_003637.3    | 8515      | ITGA10   | 5170  | 0.969669 | 4.08453  | -2.0746  | 5.00E-05 | 0.00170056 |
| NM_006743.4    | 5935      | RBM3     | 4432  | 68.2714  | 32.7683  | 1.05898  | 5.00E-05 | 0.00170056 |
| NM_175610.2    | 7082      | TJP1     | 6925  | 13.7364  | 54.4488  | -1.98689 | 5.00E-05 | 0.00170056 |



|                |        |          |       |          |          |           |          |            |
|----------------|--------|----------|-------|----------|----------|-----------|----------|------------|
| NM_170744.3    | 219699 | UNC5B    | 4998  | 3.42136  | 8.21604  | -1.26387  | 5.00E-05 | 0.00170056 |
| NM_000636.2    | 6648   | SOD2     | 1593  | 184.076  | 75.8287  | 1.27949   | 5.00E-05 | 0.00170056 |
| NM_001372.3    | 1770   | DNAH9    | 13750 | 11.576   | 24.7797  | -1.09802  | 5.00E-05 | 0.00170056 |
| NM_016523.1    | 51348  | KLRF1    | 1242  | 5.05444  | 0.967638 | 2.38501   | 5.00E-05 | 0.00170056 |
| NM_001142966.1 | 80000  | GREB1L   | 6052  | 0.909657 | 5.39672  | -2.56869  | 5.00E-05 | 0.00170056 |
| NM_130386.2    | 81035  | COLEC12  | 3134  | 28.7509  | 57.4232  | -0.998026 | 5.00E-05 | 0.00170056 |
| NM_032446.2    | 84466  | MEGF10   | 7689  | 0.55008  | 2.26397  | -2.04114  | 5.00E-05 | 0.00170056 |
| NM_004683.4    | 9104   | RGN      | 1615  | 1.84038  | 9.81361  | -2.41478  | 5.00E-05 | 0.00170056 |
| NM_001127595.1 | 2214   | FCGR3A   | 2155  | 65.3784  | 17.2765  | 1.92      | 5.00E-05 | 0.00170056 |
| NM_152860.1    | 121340 | SP7      | 2974  | 0.382827 | 2.13551  | -2.47982  | 5.00E-05 | 0.00170056 |
| NM_020546.2    | 108    | ADCY2    | 6553  | 4.16552  | 9.7531   | -1.22736  | 5.00E-05 | 0.00170056 |
| NM_002578.3    | 5063   | PAK3     | 2754  | 1.90389  | 6.02646  | -1.66236  | 5.00E-05 | 0.00170056 |
| NM_004120.3    | 2634   | GBP2     | 2595  | 102.505  | 48.1214  | 1.09094   | 5.00E-05 | 0.00170056 |
| NM_001128148.1 | 7037   | TFRC     | 5083  | 43.4388  | 15.7885  | 1.46011   | 5.00E-05 | 0.00170056 |
| NM_007072.2    | 11148  | HHLA2    | 2660  | 1.35291  | 7.80557  | -2.52844  | 5.00E-05 | 0.00170056 |
| NM_006332.3    | 10437  | IFI30    | 1032  | 104.067  | 25.0932  | 2.05214   | 5.00E-05 | 0.00170056 |
| NM_002986.2    | 6356   | CCL11    | 925   | 10.2261  | 2.42561  | 2.07584   | 5.00E-05 | 0.00170056 |
| NM_003012.4    | 6422   | SFRP1    | 4467  | 71.5409  | 197.444  | -1.4646   | 5.00E-05 | 0.00170056 |
| NM_002201.4    | 3669   | ISG20    | 956   | 34.3377  | 11.7002  | 1.55326   | 5.00E-05 | 0.00170056 |
| NM_000849.4    | 2947   | GSTM3    | 4127  | 7.44923  | 17.5574  | -1.23691  | 5.00E-05 | 0.00170056 |
| NM_017709.3    | 54855  | FAM46C   | 5720  | 73.8697  | 27.8846  | 1.40551   | 5.00E-05 | 0.00170056 |
| NM_004787.1    | 9353   | SLIT2    | 4950  | 6.46368  | 55.0618  | -3.09062  | 5.00E-05 | 0.00170056 |
| NM_002162.3    | 3385   | ICAM3    | 1780  | 18.9177  | 7.05418  | 1.42319   | 5.00E-05 | 0.00170056 |
| NM_000047.2    | 415    | ARSE     | 2220  | 1.17565  | 3.49228  | -1.57071  | 5.00E-05 | 0.00170056 |
| NM_003104.5    | 6652   | SORD     | 2813  | 40.6416  | 18.3127  | 1.15011   | 5.00E-05 | 0.00170056 |
| NM_001097638.2 | 2524   | FUT2     | 3089  | 18.942   | 8.33853  | 1.18373   | 5.00E-05 | 0.00170056 |
| NM_001140.3    | 246    | ALOX15   | 2684  | 62.3893  | 133.916  | -1.10196  | 5.00E-05 | 0.00170056 |
| NM_002119.3    | 3111   | HLA-DOA  | 3485  | 38.7255  | 12.2806  | 1.6569    | 5.00E-05 | 0.00170056 |
| 3501           | 3501   | -        | 980   | 753.4    | 85.1202  | 3.14584   | 5.00E-05 | 0.00170056 |
| 3502           | 3502   | -        | 1348  | 1054.44  | 298.513  | 1.82061   | 5.00E-05 | 0.00170056 |
| 3503           | 3503   | -        | 983   | 173.058  | 21.8126  | 2.98802   | 5.00E-05 | 0.00170056 |
| 3507           | 3507   | -        | 1486  | 322.04   | 61.5317  | 2.38784   | 5.00E-05 | 0.00170056 |
| NM_003383.3    | 7436   | VLDLR    | 3636  | 1.9108   | 13.4397  | -2.81425  | 5.00E-05 | 0.00170056 |
| NM_001033047.2 | 255743 | NPNT     | 4592  | 5.20316  | 21.7058  | -2.06062  | 5.00E-05 | 0.00170056 |
| NM_015991.2    | 712    | C1QA     | 1098  | 144.189  | 69.9382  | 1.04381   | 5.00E-05 | 0.00170056 |
| NM_016235.1    | 51704  | GPRC5B   | 2845  | 24.6947  | 50.93    | -1.04432  | 5.00E-05 | 0.00170056 |
| NM_002334.3    | 4038   | LRP4     | 8227  | 1.47768  | 6.31228  | -2.09483  | 5.00E-05 | 0.00170056 |
| NM_000100.2    | 1476   | CSTB     | 658   | 122.62   | 53.7932  | 1.1887    | 5.00E-05 | 0.00170056 |
| NM_007115.3    | 7130   | TNFAIP6  | 1424  | 8.50815  | 1.43809  | 2.56469   | 5.00E-05 | 0.00170056 |
| NM_018557.2    | 53353  | LRP1B    | 16531 | 5.0119   | 31.27    | -2.64135  | 5.00E-05 | 0.00170056 |
| NM_000584.3    | 3576   | IL8      | 1705  | 34.9818  | 4.72844  | 2.88717   | 5.00E-05 | 0.00170056 |
| NM_002178.2    | 3489   | IGFBP6   | 966   | 26.0181  | 77.1555  | -1.56825  | 5.00E-05 | 0.00170056 |
| NM_006798.2    | 10941  | UGT2A1   | 2602  | 19.8036  | 119.231  | -2.58993  | 5.00E-05 | 0.00170056 |
| NM_004710.3    | 9144   | SYNGR2   | 1694  | 28.3693  | 13.3931  | 1.08284   | 5.00E-05 | 0.00170056 |
| NM_005322.2    | 3009   | HIST1H1B | 790   | 55.6771  | 20.4327  | 1.4462    | 5.00E-05 | 0.00170056 |
| NM_006073.2    | 10345  | TRDN     | 4475  | 0.120289 | 1.8518   | -3.94435  | 5.00E-05 | 0.00170056 |
| NM_004115.3    | 2259   | FGF14    | 2720  | 7.83595  | 17.1291  | -1.12827  | 5.00E-05 | 0.00170056 |
| NM_006988.3    | 9510   | ADAMTS1  | 4651  | 46.9244  | 11.7692  | 1.99532   | 5.00E-05 | 0.00170056 |
| NM_000494.3    | 1308   | COL17A1  | 5610  | 6.93792  | 1.50136  | 2.20823   | 5.00E-05 | 0.00170056 |
| NM_001242.4    | 939    | CD27     | 1320  | 17.3508  | 5.43311  | 1.67515   | 5.00E-05 | 0.00170056 |
| NM_054114.3    | 117289 | TAGAP    | 3363  | 17.5662  | 7.31083  | 1.2647    | 5.00E-05 | 0.00170056 |
| NM_002725.3    | 5549   | PRELP    | 5820  | 1.29927  | 4.20122  | -1.69311  | 5.00E-05 | 0.00170056 |
| NM_207517.2    | 57188  | ADAMTSL3 | 7336  | 2.21176  | 5.16367  | -1.2232   | 5.00E-05 | 0.00170056 |
| NM_003695.2    | 8581   | LY6D     | 802   | 8.65824  | 0.616338 | 3.81228   | 5.00E-05 | 0.00170056 |

|                |             |          |       |          |          |           |          |            |
|----------------|-------------|----------|-------|----------|----------|-----------|----------|------------|
| NM_004131.4    | 3002        | GZMB     | 927   | 15.4069  | 3.68794  | 2.06269   | 5.00E-05 | 0.00170056 |
| NM_173833.5    | 286133      | SCARA5   | 4151  | 4.76469  | 11.485   | -1.26929  | 5.00E-05 | 0.00170056 |
| NM_147189.2    | 90362       | FAM110B  | 4368  | 1.78971  | 5.03693  | -1.49282  | 5.00E-05 | 0.00170056 |
| NM_001710.5    | 629         | CFB      | 2627  | 173.38   | 34.0062  | 2.35007   | 5.00E-05 | 0.00170056 |
| TCONS_00023764 | XLOC_000192 | -        | 17064 | 3.03785  | 10.3915  | -1.77428  | 5.00E-05 | 0.00170056 |
| NM_025208.4    | 80310       | PDGFD    | 3993  | 14.3447  | 50.6722  | -1.82067  | 5.00E-05 | 0.00170056 |
| NM_000518.4    | 3043        | HBB      | 626   | 77.3997  | 324.147  | -2.06625  | 5.00E-05 | 0.00170056 |
| NM_002010.2    | 2254        | FGF9     | 4530  | 1.26164  | 3.95586  | -1.64869  | 5.00E-05 | 0.00170056 |
| TCONS_00283549 | XLOC_023644 | -        | 4674  | 1.51698  | 4.41261  | -1.54043  | 5.00E-05 | 0.00170056 |
| NM_020646.1    | 56676       | ASCL3    | 650   | 11.9154  | 2.86395  | 2.05675   | 5.00E-05 | 0.00170056 |
| NM_005233.5    | 2042        | EPHA3    | 5809  | 1.05007  | 6.61111  | -2.65441  | 5.00E-05 | 0.00170056 |
| NM_173054.2    | 5649        | RELN     | 11565 | 0.083582 | 2.0522   | -4.61784  | 5.00E-05 | 0.00170056 |
| NM_003890.2    | 8857        | FCGBP    | 16390 | 2.30969  | 0.968251 | 1.25425   | 5.00E-05 | 0.00170056 |
| TCONS_00065541 | XLOC_005937 | -        | 424   | 0        | 1.39769  | #NAME?    | 5.00E-05 | 0.00170056 |
| NM_000450.2    | 6401        | SELE     | 3875  | 3.73904  | 1.0889   | 1.7798    | 5.00E-05 | 0.00170056 |
| NM_002126.4    | 3131        | HLF      | 5599  | 12.6699  | 26.3107  | -1.05425  | 5.00E-05 | 0.00170056 |
| NM_080826.1    | 140862      | ISM1     | 2592  | 0.451919 | 3.53493  | -2.96754  | 5.00E-05 | 0.00170056 |
| NM_014675.3    | 9696        | CROCC    | 6656  | 5.33402  | 11.6895  | -1.13191  | 5.00E-05 | 0.00170056 |
| TCONS_00049984 | XLOC_004304 | -        | 3774  | 3.43389  | 0.991739 | 1.79181   | 5.00E-05 | 0.00170056 |
| NM_198505.2    | 344905      | ATP13A5  | 3657  | 1.33878  | 0.202547 | 2.72459   | 5.00E-05 | 0.00170056 |
| NM_000397.3    | 1536        | CYBB     | 4318  | 96.4217  | 32.2032  | 1.58215   | 5.00E-05 | 0.00170056 |
| NM_001008539.3 | 6542        | SLC7A2   | 7571  | 27.3407  | 81.1648  | -1.5698   | 5.00E-05 | 0.00170056 |
| NM_001511.2    | 2919        | CXCL1    | 1109  | 88.6328  | 26.2248  | 1.75691   | 5.00E-05 | 0.00170056 |
| NM_006914.3    | 6096        | RORL     | 3604  | 4.13765  | 11.2635  | -1.44478  | 5.00E-05 | 0.00170056 |
| NM_080617.4    | 140689      | CBLN4    | 2508  | 0.302009 | 4.46969  | -3.88751  | 5.00E-05 | 0.00170056 |
| NM_080607.2    | 128434      | VSTM2L   | 1966  | 3.29723  | 9.42846  | -1.51577  | 5.00E-05 | 0.00170056 |
| NM_030666.2    | 1992        | SERPINB1 | 1293  | 90.8528  | 45.2849  | 1.0045    | 5.00E-05 | 0.00170056 |
| NM_033049.3    | 56667       | MUC13    | 2876  | 13.5798  | 4.95522  | 1.45444   | 5.00E-05 | 0.00170056 |
| NM_052942.3    | 115362      | GBP5     | 4052  | 63.3245  | 13.9567  | 2.18181   | 5.00E-05 | 0.00170056 |
| NM_004419.3    | 1847        | DUSP5    | 2528  | 9.9697   | 3.02362  | 1.72127   | 5.00E-05 | 0.00170056 |
| NM_020927.1    | 57687       | VAT1L    | 3766  | 0.855003 | 2.96006  | -1.79163  | 5.00E-05 | 0.00170056 |
| NM_005746.2    | 10135       | NAMPT    | 4582  | 78.8086  | 33.1088  | 1.25114   | 5.00E-05 | 0.00170056 |
| TCONS_00202813 | XLOC_018025 | -        | 11391 | 0.549591 | 2.21341  | -2.00984  | 5.00E-05 | 0.00170056 |
| TCONS_00220788 | XLOC_018529 | -        | 12307 | 1.23444  | 9.25856  | -2.90693  | 5.00E-05 | 0.00170056 |
| NM_003463.3    | 7803        | PTP4A1   | 5082  | 35.7465  | 18.4763  | 0.952128  | 5.00E-05 | 0.00170056 |
| NM_021572.4    | 59084       | ENPP5    | 2943  | 22.3109  | 46.0303  | -1.04483  | 5.00E-05 | 0.00170056 |
| NM_001198.3    | 639         | PRDM1    | 5165  | 24.887   | 7.43687  | 1.74262   | 5.00E-05 | 0.00170056 |
| NM_016240.2    | 51435       | SCARA3   | 3631  | 8.51071  | 19.6595  | -1.20787  | 5.00E-05 | 0.00170056 |
| NM_006120.3    | 3108        | HLA-DMA  | 1122  | 105.769  | 38.8935  | 1.44331   | 5.00E-05 | 0.00170056 |
| NM_001135091.1 | 143662      | MUC15    | 3392  | 14.0165  | 27.42    | -0.968098 | 0.0001   | 0.00312189 |
| NM_006933.4    | 6526        | SLC5A3   | 11576 | 61.8618  | 28.0502  | 1.14104   | 0.0001   | 0.00312189 |
| TCONS_00003861 | XLOC_000716 | -        | 2713  | 1.22155  | 4.33183  | -1.82627  | 0.0001   | 0.00312189 |
| NM_021199.2    | 58472       | SQRDL    | 1672  | 47.732   | 23.4867  | 1.02311   | 0.0001   | 0.00312189 |
| NM_004770.2    | 9312        | KCNB2    | 3582  | 2.1343   | 0.589069 | 1.85726   | 0.0001   | 0.00312189 |
| TCONS_00201765 | XLOC_018236 | -        | 8017  | 2.22685  | 4.85068  | -1.12318  | 0.0001   | 0.00312189 |
| NM_002727.2    | 5552        | SRGN     | 1254  | 222.297  | 112.672  | 0.980361  | 0.0001   | 0.00312189 |
| NM_015931.1    | 51066       | C3orf32  | 1545  | 0.50087  | 2.79847  | -2.48213  | 0.0001   | 0.00312189 |
| NM_014674.2    | 9695        | EDEM1    | 6153  | 23.8921  | 12.1409  | 0.976661  | 0.0001   | 0.00312189 |
| NM_207365.3    | 344752      | AADACL2  | 1500  | 2.54804  | 7.16366  | -1.49131  | 0.0001   | 0.00312189 |
| NM_005215.3    | 1630        | DCC      | 10210 | 2.03395  | 0.701912 | 1.53492   | 0.0001   | 0.00312189 |
| NM_001118890.1 | 2745        | GLRX     | 1079  | 32.0612  | 13.2694  | 1.27273   | 0.0001   | 0.00312189 |
| NM_207437.3    | 196385      | DNAH10   | 13680 | 11.213   | 23.8282  | -1.08749  | 0.0001   | 0.00312189 |
| NM_024641.3    | 79694       | MANEA    | 4616  | 20.8958  | 10.3783  | 1.00965   | 0.0001   | 0.00312189 |
| NM_016247.3    | 50939       | IMP2     | 8352  | 3.30593  | 1.41247  | 1.22684   | 0.0001   | 0.00312189 |

|                   |                   |               |       |          |          |           |         |            |
|-------------------|-------------------|---------------|-------|----------|----------|-----------|---------|------------|
| NM_003358.1       | 7357              | UGCG          | 1637  | 62.39    | 30.6513  | 1.02537   | 0.0001  | 0.00312189 |
| NM_005079.2       | 7163              | TPD52         | 3961  | 32.4916  | 14.9664  | 1.11834   | 0.0001  | 0.00312189 |
| NM_001678.3       | 482               | ATP1B2        | 3332  | 0.762437 | 2.46752  | -1.69437  | 0.0001  | 0.00312189 |
| NM_000930.3       | 5327              | PLAT          | 3173  | 13.9735  | 28.5812  | -1.03237  | 0.0001  | 0.00312189 |
| NM_006982.2       | 8092              | ALX1          | 1294  | 1.12406  | 4.80268  | -2.09512  | 0.0001  | 0.00312189 |
| TCONS_00196366    | XLOC_017565       | -             | 4542  | 0.549801 | 2.00249  | -1.86482  | 0.0001  | 0.00312189 |
| NM_003937.2       | 8942              | KYNU          | 1672  | 25.4138  | 6.80954  | 1.89998   | 0.0001  | 0.00312189 |
| NM_002801.3       | 5699              | PSMB10        | 1006  | 51.9012  | 24.4448  | 1.08624   | 0.0001  | 0.00312189 |
| NM_019111.4       | 3122              | HLA-DRA       | 1280  | 1499.11  | 472.152  | 1.66678   | 0.0001  | 0.00312189 |
| TCONS_00155291    | XLOC_013582       | -             | 1719  | 0.185567 | 2.36377  | -3.67108  | 0.0001  | 0.00312189 |
| NM_182762.3       | 346389            | MACC1         | 9159  | 18.9415  | 10.211   | 0.891423  | 0.0001  | 0.00312189 |
| NM_002616.2       | 5187              | PER1          | 4709  | 4.96497  | 9.60308  | -0.951713 | 0.0001  | 0.00312189 |
| NM_004665.2       | 8875              | VNN2          | 2004  | 25.001   | 5.6722   | 2.14      | 0.0001  | 0.00312189 |
| NM_001204376.1    | 4883              | NPR3          | 6380  | 5.73845  | 1.65885  | 1.79048   | 0.0001  | 0.00312189 |
| 3495              | 3495              | -             | 1154  | 76.9939  | 31.0776  | 1.30887   | 0.0001  | 0.00312189 |
| 3493              | 3493              | -             | 1061  | 2466.19  | 410.424  | 2.5871    | 0.0001  | 0.00312189 |
| NM_025159.2       | 80231             | CXorf21       | 1927  | 7.87925  | 3.16143  | 1.31748   | 0.0001  | 0.00312189 |
| NM_000211.3       | 3689              | ITGB2         | 2958  | 27.7845  | 12.9395  | 1.10249   | 0.0001  | 0.00312189 |
| NM_003613.3       | 8483              | CILP          | 4468  | 0.455992 | 1.67811  | -1.87976  | 0.0001  | 0.00312189 |
| NM_002030.3       | 2359              | FPR3          | 2517  | 26.7632  | 13.4726  | 0.990223  | 0.0001  | 0.00312189 |
| NM_025079.2       | 80149             | ZC3H12A       | 2716  | 6.66306  | 2.36571  | 1.49391   | 0.0001  | 0.00312189 |
| NM_001199149.1    | 4057              | LTF           | 2508  | 485.255  | 102.844  | 2.23829   | 0.0001  | 0.00312189 |
| TCONS_00047584    | XLOC_003947       | -             | 3909  | 5.36261  | 14.2751  | -1.41249  | 0.0001  | 0.00312189 |
| ENST00000604271.2 | ENSG00000270571.2 | RP11-355F16.1 | 3438  | 2.54713  | 9.54114  | -1.90529  | 0.0001  | 0.00312189 |
| TCONS_00005779    | XLOC_000192       | -             | 16777 | 2.02085  | 6.62714  | -1.71342  | 0.0001  | 0.00312189 |
| NM_000888.3       | 3694              | ITGB6         | 2397  | 9.80774  | 3.97843  | 1.30172   | 0.0001  | 0.00312189 |
| NM_178026.2       | 2686              | GGT7          | 2640  | 4.77749  | 10.8024  | -1.17702  | 0.0001  | 0.00312189 |
| NM_005996.3       | 6926              | TBX3          | 4723  | 13.626   | 26.7393  | -0.972606 | 0.0001  | 0.00312189 |
| NM_001004303.4    | 199920            | C1orf168      | 3460  | 4.61639  | 10.1833  | -1.14137  | 0.0001  | 0.00312189 |
| NM_014850.2       | 9901              | SRGAP3        | 8901  | 4.53266  | 9.40501  | -1.05307  | 0.0001  | 0.00312189 |
| NM_001003845.2    | 389058            | SP5           | 1947  | 0.622839 | 2.53688  | -2.02613  | 0.0001  | 0.00312189 |
| NM_016953.3       | 50940             | PDE11A        | 9278  | 8.35974  | 3.84891  | 1.11901   | 0.0001  | 0.00312189 |
| NM_080475.2       | 89778             | SERPINB11     | 1731  | 6.30464  | 19.618   | -1.63769  | 0.0001  | 0.00312189 |
| NM_020760.1       | 57520             | HECW2         | 6926  | 2.89578  | 6.19719  | -1.09766  | 0.0001  | 0.00312189 |
| NM_015914.5       | 51061             | TXNDC11       | 3047  | 30.3862  | 13.9276  | 1.12547   | 0.0001  | 0.00312189 |
| NM_003661.3       | 8542              | APOL1         | 2863  | 42.9307  | 20.3028  | 1.08033   | 0.0001  | 0.00312189 |
| NM_004877.2       | 9535              | GMFG          | 657   | 50.1102  | 20.698   | 1.27562   | 0.0001  | 0.00312189 |
| NM_005337.4       | 3071              | NCKAP1L       | 3893  | 29.9674  | 15.6878  | 0.933746  | 0.0001  | 0.00312189 |
| NM_004522.1       | 3800              | KIF5C         | 6933  | 2.5609   | 0.995353 | 1.36337   | 0.0001  | 0.00312189 |
| NM_144966.5       | 158326            | FREM1         | 10086 | 1.86734  | 4.38803  | -1.23259  | 0.0001  | 0.00312189 |
| NM_032855.2       | 84941             | HSH2D         | 2367  | 9.39671  | 4.01723  | 1.22595   | 0.00015 | 0.00437065 |
| TCONS_00006208    | XLOC_000770       | -             | 3554  | 2.83672  | 6.42519  | -1.17952  | 0.00015 | 0.00437065 |
| NM_001860.2       | 1318              | SLC31A2       | 1774  | 20.5591  | 9.24688  | 1.15274   | 0.00015 | 0.00437065 |
| NM_003619.3       | 8492              | PRSS12        | 4573  | 14.7944  | 27.5263  | -0.895756 | 0.00015 | 0.00437065 |
| NM_000587.2       | 730               | C7            | 4012  | 21.6512  | 44.2936  | -1.03265  | 0.00015 | 0.00437065 |
| NM_020844.2       | 57604             | KIAA1456      | 9590  | 3.14456  | 8.11618  | -1.36794  | 0.00015 | 0.00437065 |
| NM_001067.3       | 7153              | TOP2A         | 5753  | 10.5628  | 4.72787  | 1.15972   | 0.00015 | 0.00437065 |
| NM_020361.4       | 57094             | CPA6          | 1904  | 0.339249 | 1.60206  | -2.23951  | 0.00015 | 0.00437065 |
| NM_000851.3       | 2949              | GSTM5         | 1570  | 2.35722  | 7.12814  | -1.59644  | 0.00015 | 0.00437065 |
| NM_024913.4       | 79974             | C7orf58       | 5320  | 7.07342  | 14.1535  | -1.00068  | 0.00015 | 0.00437065 |
| NM_007315.3       | 6772              | STAT1         | 4308  | 294.177  | 94.0657  | 1.64495   | 0.00015 | 0.00437065 |
| NM_005582.2       | 4064              | CD180         | 2716  | 9.4064   | 3.95623  | 1.24951   | 0.00015 | 0.00437065 |
| NM_052904.3       | 114792            | KLHL32        | 3807  | 1.82112  | 4.80965  | -1.40111  | 0.00015 | 0.00437065 |
| NM_005447.3       | 9182              | RASSF9        | 1796  | 14.7397  | 28.8602  | -0.96937  | 0.00015 | 0.00437065 |

|                   |                   |          |       |          |          |           |         |            |
|-------------------|-------------------|----------|-------|----------|----------|-----------|---------|------------|
| NM_000220.2       | 3758              | KCNJ1    | 2332  | 0.875611 | 3.68891  | -2.07483  | 0.00015 | 0.00437065 |
| NM_001098843.3    | 645090            | CXorf30  | 2863  | 6.73563  | 15.3101  | -1.1846   | 0.00015 | 0.00437065 |
| NM_003956.3       | 9023              | CH25H    | 1378  | 7.25585  | 17.7909  | -1.29392  | 0.00015 | 0.00437065 |
| NM_144577.3       | 93233             | CCDC114  | 3220  | 4.41656  | 9.73158  | -1.13975  | 0.00015 | 0.00437065 |
| NM_016445.1       | 26499             | PLEK2    | 1460  | 9.43797  | 3.17207  | 1.57305   | 0.00015 | 0.00437065 |
| NM_012252.2       | 22797             | TFEC     | 6631  | 11.403   | 5.35801  | 1.08964   | 0.00015 | 0.00437065 |
| NM_016021.2       | 51465             | UBE2J1   | 4342  | 62.4642  | 31.4501  | 0.989968  | 0.00015 | 0.00437065 |
| NM_001018071.3    | 143162            | FRMPD2   | 5024  | 5.3588   | 10.6401  | -0.989524 | 0.00015 | 0.00437065 |
| NM_001369.2       | 1767              | DNAH5    | 15573 | 34.1222  | 86.2259  | -1.33741  | 0.00015 | 0.00437065 |
| NM_003810.3       | 8743              | TNFSF10  | 1953  | 176.591  | 90.7801  | 0.959968  | 0.00015 | 0.00437065 |
| NM_005328.2       | 3037              | HAS2     | 3275  | 4.18533  | 1.47874  | 1.50097   | 0.00015 | 0.00437065 |
| NM_018475.3       | 55858             | TMEM165  | 1965  | 71.651   | 38.0149  | 0.914423  | 0.00015 | 0.00437065 |
| NM_001080471.1    | 375033            | PEAR1    | 4866  | 4.64335  | 9.18066  | -0.983434 | 0.00015 | 0.00437065 |
| NM_015932.5       | 51371             | POMP     | 1462  | 51.127   | 25.9147  | 0.980316  | 0.00015 | 0.00437065 |
| NM_173050.3       | 80274             | SCUBE1   | 3868  | 0.462918 | 1.63163  | -1.81749  | 0.00015 | 0.00437065 |
| NM_005202.2       | 1296              | COL8A2   | 4447  | 10.0104  | 21.2432  | -1.0855   | 0.00015 | 0.00437065 |
| NM_152547.4       | 153579            | BTNL9    | 3500  | 1.6415   | 4.53135  | -1.46493  | 0.00015 | 0.00437065 |
| NM_003221.3       | 7021              | TFAP2B   | 5770  | 1.31863  | 3.17204  | -1.26637  | 0.00015 | 0.00437065 |
| NM_138456.3       | 116071            | BATF2    | 2140  | 5.63184  | 1.88532  | 1.57879   | 0.00015 | 0.00437065 |
| NM_003881.2       | 8839              | WISP2    | 1404  | 4.02802  | 1.10189  | 1.87009   | 0.00015 | 0.00437065 |
| NM_003278.2       | 7123              | CLEC3B   | 852   | 93.9382  | 41.7291  | 1.17066   | 0.00015 | 0.00437065 |
| NM_007356.2       | 22798             | LAMB4    | 5858  | 1.11046  | 0.274688 | 2.01529   | 0.00015 | 0.00437065 |
| TCONS_00187673    | XLOC_016076       | -        | 900   | 0.853881 | 4.93536  | -2.53105  | 0.00015 | 0.00437065 |
| TCONS_00048685    | XLOC_003947       | -        | 3649  | 1.38522  | 3.90145  | -1.4939   | 0.00015 | 0.00437065 |
| NM_002982.3       | 6347              | CCL2     | 749   | 61.4655  | 27.8862  | 1.14022   | 0.00015 | 0.00437065 |
| NM_004319.1       | 460               | ASTN1    | 7314  | 1.88765  | 4.67112  | -1.30718  | 0.00015 | 0.00437065 |
| NM_012198.3       | 25801             | GCA      | 3226  | 14.0182  | 6.82261  | 1.0389    | 0.00015 | 0.00437065 |
| NM_030627.2       | 80315             | CPEB4    | 7769  | 32.7505  | 17.4491  | 0.908368  | 0.0002  | 0.00554203 |
| NM_001099772.1    | 1580              | CYP4B1   | 2158  | 45.0329  | 128.138  | -1.50865  | 0.0002  | 0.00554203 |
| NM_003540.3       | 8361              | HIST1H4F | 368   | 123.763  | 48.6913  | 1.34584   | 0.0002  | 0.00554203 |
| NM_203416.2       | 9332              | CD163    | 4110  | 49.2608  | 21.4885  | 1.19688   | 0.0002  | 0.00554203 |
| TCONS_00012089    | XLOC_000775       | -        | 4929  | 0.573268 | 1.84909  | -1.68954  | 0.0002  | 0.00554203 |
| NM_005654.4       | 7025              | NR2F1    | 3199  | 1.25699  | 3.96515  | -1.65741  | 0.0002  | 0.00554203 |
| NM_001195286.1    | 3662              | IRF4     | 5324  | 8.36624  | 2.36087  | 1.82526   | 0.0002  | 0.00554203 |
| NM_012244.2       | 23428             | SLC7A8   | 4216  | 4.97323  | 10.0652  | -1.01712  | 0.0002  | 0.00554203 |
| NM_145051.3       | 138065            | RNF183   | 1210  | 2.60384  | 0.469263 | 2.47217   | 0.0002  | 0.00554203 |
| NM_001225.3       | 837               | CASP4    | 1319  | 112.223  | 62.3028  | 0.848998  | 0.0002  | 0.00554203 |
| NM_032048.2       | 84034             | EMILIN2  | 4009  | 11.5183  | 5.86863  | 0.972827  | 0.0002  | 0.00554203 |
| NM_000161.2       | 2643              | GCH1     | 2926  | 16.5023  | 7.82924  | 1.07572   | 0.0002  | 0.00554203 |
| NM_006762.2       | 7805              | LAPTM5   | 2240  | 93.036   | 45.4328  | 1.03405   | 0.0002  | 0.00554203 |
| NM_021129.3       | 5464              | PPA1     | 1302  | 107.666  | 54.4734  | 0.982944  | 0.0002  | 0.00554203 |
| NM_001112718.1    | 22998             | LIMCH1   | 6084  | 12.719   | 24.3684  | -0.938024 | 0.0002  | 0.00554203 |
| NM_004431.3       | 1969              | EPHA2    | 3964  | 5.11571  | 10.0569  | -0.975176 | 0.0002  | 0.00554203 |
| NM_015900.3       | 51365             | PLA1A    | 1780  | 11.4027  | 3.08154  | 1.88765   | 0.0002  | 0.00554203 |
| NM_138554.3       | 7099              | TLR4     | 5653  | 29.0756  | 15.526   | 0.905122  | 0.0002  | 0.00554203 |
| NM_199204.1       | 10170             | DHRS9    | 1917  | 47.4187  | 20.6595  | 1.19865   | 0.0002  | 0.00554203 |
| NM_001775.2       | 952               | CD38     | 1491  | 28.9395  | 12.6906  | 1.18928   | 0.0002  | 0.00554203 |
| NM_032793.3       | 84879             | MFSD2A   | 2162  | 6.77281  | 2.42036  | 1.48453   | 0.0002  | 0.00554203 |
| TCONS_00299614    | XLOC_024794       | -        | 7010  | 1.07514  | 0.291239 | 1.88426   | 0.0002  | 0.00554203 |
| ENST00000517927.1 | ENSG00000253522.2 | MIR146A  | 2301  | 4.34139  | 1.51442  | 1.51939   | 0.0002  | 0.00554203 |
| NM_018086.2       | 55137             | FIGN     | 4535  | 1.8845   | 4.33604  | -1.2022   | 0.0002  | 0.00554203 |
| NM_004711.4       | 9145              | SYNGR1   | 4438  | 3.01869  | 6.96169  | -1.20551  | 0.0002  | 0.00554203 |
| NM_017688.2       | 54836             | BSPRY    | 2348  | 9.6654   | 3.86445  | 1.32257   | 0.0002  | 0.00554203 |
| TCONS_00196029    | XLOC_017238       | -        | 2296  | 0.361734 | 1.62119  | -2.16405  | 0.0002  | 0.00554203 |

|                |             |              |       |          |          |           |         |            |
|----------------|-------------|--------------|-------|----------|----------|-----------|---------|------------|
| NM_001953.3    | 1890        | TYMP         | 1659  | 26.8081  | 5.18487  | 2.37029   | 0.0002  | 0.00554203 |
| NM_004417.3    | 1843        | DUSP1        | 2024  | 53.0246  | 27.4142  | 0.951737  | 0.0002  | 0.00554203 |
| TCONS_00114410 | XLOC_009730 | -            | 4688  | 16.0291  | 32.4166  | -1.01604  | 0.0002  | 0.00554203 |
| NM_001692.3    | 525         | ATP6V1B1     | 1939  | 1.94418  | 6.22053  | -1.67788  | 0.0002  | 0.00554203 |
| NM_001046.2    | 6558        | SLC12A2      | 6860  | 55.2115  | 26.3532  | 1.06699   | 0.0002  | 0.00554203 |
| NM_145000.3    | 202151      | RANBP3L      | 2543  | 0.806251 | 2.49278  | -1.62846  | 0.00025 | 0.00665625 |
| NM_001778.2    | 962         | CD48         | 1070  | 53.7253  | 27.1837  | 0.98286   | 0.00025 | 0.00665625 |
| NM_001032.3    | 6235        | RPS29        | 296   | 1922.25  | 1037.46  | 0.889739  | 0.00025 | 0.00665625 |
| NM_017773.3    | 54900       | LAX1         | 3298  | 15.515   | 4.36716  | 1.8289    | 0.00025 | 0.00665625 |
| NM_003332.3    | 7305        | TYROBP       | 591   | 33.9205  | 11.7458  | 1.53002   | 0.00025 | 0.00665625 |
| NM_145290.2    | 166647      | GPR125       | 4560  | 10.5656  | 19.6396  | -0.894393 | 0.00025 | 0.00665625 |
| NM_001045.4    | 6532        | SLC6A4       | 4535  | 0.287194 | 1.08847  | -1.9222   | 0.00025 | 0.00665625 |
| NM_173462.3    | 89932       | PAPLN        | 5834  | 2.13347  | 4.51797  | -1.08247  | 0.00025 | 0.00665625 |
| NM_005958.3    | 4543        | MTNR1A       | 1105  | 3.61336  | 0.556358 | 2.69925   | 0.00025 | 0.00665625 |
| NM_052846.1    | 90187       | EMILIN3      | 3827  | 0.798878 | 3.64216  | -2.18875  | 0.00025 | 0.00665625 |
| NM_016341.3    | 51196       | PLCE1        | 7992  | 7.8013   | 14.6711  | -0.911193 | 0.00025 | 0.00665625 |
| NM_197941.2    | 11174       | ADAMTS6      | 7268  | 2.94526  | 1.34298  | 1.13295   | 0.00025 | 0.00665625 |
| NM_002530.2    | 4916        | NTRK3        | 2818  | 1.84269  | 8.48226  | -2.20263  | 0.00025 | 0.00665625 |
| NM_014571.3    | 26508       | HEYL         | 4114  | 1.07222  | 2.86891  | -1.4199   | 0.00025 | 0.00665625 |
| NM_001033723.2 | 619279      | ZNF704       | 14386 | 7.70442  | 14.0041  | -0.862086 | 0.00025 | 0.00665625 |
| NM_153840.2    | 266977      | GPR110       | 3078  | 16.1124  | 7.43966  | 1.11486   | 0.00025 | 0.00665625 |
| NM_016562.3    | 51284       | TLR7         | 4992  | 7.00989  | 3.41397  | 1.03794   | 0.00025 | 0.00665625 |
| NM_002661.2    | 5336        | PLCG2        | 4241  | 16.7802  | 8.93604  | 0.909057  | 0.00025 | 0.00665625 |
| NM_017423.2    | 51809       | GALNT7       | 4307  | 22.7749  | 11.8354  | 0.944341  | 0.00025 | 0.00665625 |
| NM_001530.3    | 3091        | HIF1A        | 4059  | 69.53    | 37.4411  | 0.893015  | 0.00025 | 0.00665625 |
| NM_031422.4    | 83539       | CHST9        | 2246  | 59.9675  | 118.083  | -0.977543 | 0.00025 | 0.00665625 |
| NM_052909.3    | 153478      | PLEKHG4B     | 11515 | 0.513103 | 1.24942  | -1.28394  | 0.00025 | 0.00665625 |
| NM_001460.2    | 2327        | FMO2         | 5181  | 41.7565  | 116.347  | -1.47835  | 0.00025 | 0.00665625 |
| NM_002198.2    | 3659        | IRF1         | 3554  | 29.911   | 12.3937  | 1.27107   | 0.00025 | 0.00665625 |
| NM_022097.2    | 63928       | CHP2         | 2366  | 5.60138  | 12.9581  | -1.21     | 0.00025 | 0.00665625 |
| NM_144650.2    | 137872      | ADHFE1       | 1895  | 2.20059  | 5.88896  | -1.42013  | 0.00025 | 0.00665625 |
| NM_173615.3    | 146177      | VWA3A        | 4600  | 5.90151  | 11.1983  | -0.92412  | 0.00025 | 0.00665625 |
| NM_144975.3    | 162394      | SLFN5        | 4654  | 75.6605  | 39.5832  | 0.934653  | 0.00025 | 0.00665625 |
| NM_032744.3    | 84830       | C6orf105     | 1804  | 5.54516  | 1.50068  | 1.88562   | 0.00025 | 0.00665625 |
| NM_153228.2    | 162282      | ANKFN1       | 2426  | 4.73041  | 10.9039  | -1.2048   | 0.00025 | 0.00665625 |
| NM_133460.1    | 147686      | ZNF418       | 3694  | 2.59181  | 5.88712  | -1.1836   | 0.00025 | 0.00665625 |
| NM_001559.2    | 3595        | IL12RB2      | 4040  | 3.1567   | 1.17559  | 1.42503   | 0.00025 | 0.00665625 |
| NM_201563.4    | 9103        | FCGR2C       | 1510  | 15.6102  | 6.40509  | 1.2852    | 0.00025 | 0.00665625 |
| NM_000898.4    | 4129        | MAOB         | 2595  | 6.04954  | 13.685   | -1.17769  | 0.00025 | 0.00665625 |
| NM_005467.3    | 10003       | NAALAD2      | 3196  | 4.35563  | 9.39162  | -1.10849  | 0.00025 | 0.00665625 |
| NM_006890.3    | 1087        | CEACAM7      | 2289  | 2.41161  | 0.632481 | 1.9309    | 0.00025 | 0.00665625 |
| NM_018235.2    | 55748       | CNDP2        | 5073  | 26.5522  | 14.4329  | 0.87947   | 0.0003  | 0.00772176 |
| NM_144980.3    | 168090      | C6orf118     | 1839  | 12.7925  | 25.5535  | -0.998217 | 0.0003  | 0.00772176 |
| NM_001854.3    | 1301        | COL11A1      | 7291  | 12.5191  | 32.4633  | -1.37468  | 0.0003  | 0.00772176 |
| NM_001170820.3 | 402778      | IFITM10      | 3709  | 1.00254  | 2.86259  | -1.51367  | 0.0003  | 0.00772176 |
| NM_001676.5    | 479         | ATP12A       | 3716  | 8.72366  | 3.85656  | 1.17762   | 0.0003  | 0.00772176 |
| NM_014692.1    | 9717        | SEC14L5      | 6456  | 0.349343 | 1.09483  | -1.648    | 0.0003  | 0.00772176 |
| NM_198795.1    | 56165       | TDRD1        | 4510  | 0.829198 | 2.36099  | -1.5096   | 0.0003  | 0.00772176 |
| NM_002232.3    | 3738        | KCNA3        | 3346  | 14.7216  | 7.64595  | 0.945172  | 0.0003  | 0.00772176 |
| NM_032991.2    | 836         | CASP3        | 2506  | 41.8237  | 19.9246  | 1.06977   | 0.0003  | 0.00772176 |
| TCONS_00032236 | XLOC_003060 | -            | 7128  | 0.659161 | 1.74886  | -1.40771  | 0.0003  | 0.00772176 |
| NM_014058.3    | 28983       | TMPRSS11E    | 2136  | 2.63046  | 0.6013   | 2.12916   | 0.0003  | 0.00772176 |
| XM_003403505.1 | 100652743   | LOC100652743 | 456   | 22.3162  | 6.28177  | 1.82885   | 0.0003  | 0.00772176 |
| NM_014786.3    | 9828        | ARHGEF17     | 7813  | 4.15059  | 7.80547  | -0.911167 | 0.0003  | 0.00772176 |

|                |             |              |       |          |          |           |         |            |
|----------------|-------------|--------------|-------|----------|----------|-----------|---------|------------|
| NM_002864.2    | 5858        | PZP          | 4610  | 5.29491  | 10.6603  | -1.00957  | 0.0003  | 0.00772176 |
| NM_006622.2    | 10769       | PLK2         | 2786  | 81.3219  | 44.1348  | 0.881729  | 0.0003  | 0.00772176 |
| NM_006068.4    | 10333       | TLR6         | 5891  | 7.24723  | 3.68006  | 0.977702  | 0.0003  | 0.00772176 |
| NM_198595.2    | 60312       | AFAP1        | 7518  | 4.89365  | 9.42891  | -0.946179 | 0.0003  | 0.00772176 |
| NM_014746.3    | 9781        | RNF144A      | 5740  | 6.54994  | 12.3283  | -0.912421 | 0.0003  | 0.00772176 |
| NM_007035.3    | 11081       | KERA         | 2533  | 0.404639 | 1.56337  | -1.94996  | 0.0003  | 0.00772176 |
| NM_198391.2    | 23767       | FLRT3        | 4024  | 2.97372  | 11.3487  | -1.93219  | 0.0003  | 0.00772176 |
| NM_000096.3    | 1356        | CP           | 4666  | 424.023  | 146.162  | 1.53657   | 0.0003  | 0.00772176 |
| NM_152866.2    | 931         | MS4A1        | 3594  | 20.5402  | 6.09159  | 1.75356   | 0.00035 | 0.00869612 |
| NM_130783.4    | 90139       | TSPAN18      | 4235  | 1.5668   | 5.4193   | -1.79028  | 0.00035 | 0.00869612 |
| NM_001995.2    | 2180        | ACSL1        | 3805  | 27.8277  | 15.5685  | 0.837898  | 0.00035 | 0.00869612 |
| XM_002343882.1 | 100287163   | LOC100287163 | 2715  | 2.99999  | 6.98949  | -1.22023  | 0.00035 | 0.00869612 |
| NM_020693.2    | 57453       | DSCAML1      | 6899  | 0.346787 | 1.03849  | -1.58237  | 0.00035 | 0.00869612 |
| NM_021982.1    | 10802       | SEC24A       | 6387  | 22.5906  | 12.7041  | 0.830426  | 0.00035 | 0.00869612 |
| NM_020299.4    | 57016       | AKR1B10      | 1596  | 3.95944  | 1.1011   | 1.84635   | 0.00035 | 0.00869612 |
| NM_000130.4    | 2153        | F5           | 9179  | 4.60575  | 2.19784  | 1.06735   | 0.00035 | 0.00869612 |
| NM_033225.5    | 64478       | CSDM1        | 14317 | 0.550455 | 1.28835  | -1.22683  | 0.00035 | 0.00869612 |
| NM_005514.6    | 3106        | HLA-B        | 1572  | 960.619  | 389.021  | 1.30411   | 0.00035 | 0.00869612 |
| NM_020925.2    | 57685       | CACHD1       | 5274  | 13.8471  | 25.3886  | -0.874599 | 0.00035 | 0.00869612 |
| NM_152688.2    | 202559      | KHDRBS2      | 2300  | 2.44316  | 6.29703  | -1.36592  | 0.00035 | 0.00869612 |
| NM_001165.3    | 330         | BIRC3        | 5229  | 53.0886  | 27.1518  | 0.967354  | 0.00035 | 0.00869612 |
| NM_145739.2    | 114880      | OSBPL6       | 6811  | 2.65405  | 7.64767  | -1.52683  | 0.00035 | 0.00869612 |
| NM_173799.3    | 201633      | TIGIT        | 2968  | 8.63215  | 3.80273  | 1.18268   | 0.00035 | 0.00869612 |
| NM_014752.2    | 9789        | SPCS2        | 2708  | 22.2905  | 11.7304  | 0.92617   | 0.00035 | 0.00869612 |
| NM_031912.4    | 83849       | SYT15        | 5508  | 6.28864  | 11.8717  | -0.9167   | 0.00035 | 0.00869612 |
| NM_001077624.1 | 162993      | ZNF846       | 2133  | 8.50817  | 17.3222  | -1.0257   | 0.00035 | 0.00869612 |
| TCONS_00297081 | XLOC_025491 | -            | 9630  | 1.20542  | 0.455561 | 1.40382   | 0.00035 | 0.00869612 |
| XM_001715090.3 | 144535      | C12orf55     | 5721  | 16.3407  | 29.9599  | -0.874561 | 0.00035 | 0.00869612 |
| NM_181449.2    | 342510      | CD300E       | 3525  | 2.35534  | 0.779358 | 1.59558   | 0.00035 | 0.00869612 |
| NM_001175.4    | 397         | ARHGDI1B     | 1216  | 145.249  | 79.4677  | 0.870092  | 0.00035 | 0.00869612 |
| NM_001144058.1 | 50863       | NTM          | 3408  | 1.42491  | 5.62309  | -1.98049  | 0.00035 | 0.00869612 |
| NM_006536.5    | 9635        | CLCA2        | 4025  | 6.52949  | 2.5704   | 1.34498   | 0.00035 | 0.00869612 |
| NM_003509.2    | 8329        | HIST1H2AI    | 469   | 19.7312  | 4.52326  | 2.12505   | 0.00035 | 0.00869612 |
| NM_001719.2    | 655         | BMP7         | 4031  | 3.1461   | 6.93736  | -1.14082  | 0.00035 | 0.00869612 |
| NM_004445.3    | 2051        | EPHB6        | 4043  | 2.8412   | 6.27992  | -1.14424  | 0.00035 | 0.00869612 |
| TCONS_00180095 | XLOC_015624 | -            | 1504  | 0.545734 | 2.43413  | -2.15713  | 0.00035 | 0.00869612 |
| NM_145287.3    | 162655      | ZNF519       | 6810  | 1.98114  | 4.32797  | -1.12736  | 0.00035 | 0.00869612 |
| NM_170736.1    | 3772        | KCNJ15       | 2919  | 14.2357  | 1.83368  | 2.9567    | 0.0004  | 0.00971957 |
| NM_002009.3    | 2252        | FGF7         | 3936  | 72.2474  | 32.1     | 1.17037   | 0.0004  | 0.00971957 |
| NM_002818.2    | 5721        | PSME2        | 829   | 139.51   | 73.7399  | 0.919854  | 0.0004  | 0.00971957 |
| XM_003118942.2 | 374467      | C12orf63     | 2401  | 12.83    | 24.4605  | -0.930935 | 0.0004  | 0.00971957 |
| NM_000615.6    | 4684        | NCAM1        | 5962  | 2.3043   | 5.78442  | -1.32784  | 0.0004  | 0.00971957 |
| NM_014848.4    | 9899        | SV2B         | 11343 | 0.357224 | 1.02024  | -1.51401  | 0.0004  | 0.00971957 |
| NM_021647.6    | 9848        | MFAP3L       | 6189  | 1.97214  | 5.02428  | -1.34915  | 0.0004  | 0.00971957 |
| NM_007364.2    | 23423       | TMED3        | 1388  | 37.7388  | 19.8637  | 0.925914  | 0.0004  | 0.00971957 |
| NM_015541.2    | 26018       | LRIG1        | 4762  | 25.607   | 47.6389  | -0.895604 | 0.0004  | 0.00971957 |
| NM_144590.2    | 118932      | ANKRD22      | 3986  | 4.57059  | 1.79234  | 1.35054   | 0.0004  | 0.00971957 |
| NM_019107.3    | 56005       | C19orf10     | 1051  | 37.113   | 18.688   | 0.989814  | 0.0004  | 0.00971957 |
| NM_147175.3    | 90161       | HS6ST2       | 4447  | 0.563872 | 1.77242  | -1.65228  | 0.0004  | 0.00971957 |
| NM_002084.3    | 2878        | GPX3         | 1761  | 18.9579  | 36.172   | -0.93207  | 0.0004  | 0.00971957 |
| NM_002526.3    | 4907        | NT5E         | 4068  | 15.2516  | 27.6155  | -0.856522 | 0.00045 | 0.0106989  |
| NM_014903.4    | 89795       | NAV3         | 9758  | 3.01626  | 5.85657  | -0.957295 | 0.00045 | 0.0106989  |
| NM_001409.3    | 1953        | MEGF6        | 7439  | 3.12613  | 5.80969  | -0.894082 | 0.00045 | 0.0106989  |
| NM_178232.2    | 145864      | HAPLN3       | 1893  | 8.36026  | 3.63138  | 1.20303   | 0.00045 | 0.0106989  |

|                |             |              |       |          |          |           |         |           |
|----------------|-------------|--------------|-------|----------|----------|-----------|---------|-----------|
| NM_001195278.1 | 100507421   | LOC100507421 | 10558 | 1.73683  | 0.716474 | 1.27747   | 0.00045 | 0.0106989 |
| NM_014079.3    | 28999       | KLF15        | 2525  | 2.07674  | 4.99131  | -1.2651   | 0.00045 | 0.0106989 |
| NM_001146187.1 | 5178        | PEG3         | 8375  | 2.27494  | 5.29089  | -1.21769  | 0.00045 | 0.0106989 |
| NM_052972.2    | 116844      | LRG1         | 1780  | 12.4003  | 5.41354  | 1.19573   | 0.00045 | 0.0106989 |
| NM_020877.2    | 146754      | DNAH2        | 13505 | 5.95256  | 10.7199  | -0.848715 | 0.00045 | 0.0106989 |
| NM_144992.4    | 200403      | VWA3B        | 4747  | 10.3993  | 18.6574  | -0.843257 | 0.00045 | 0.0106989 |
| NM_032704.3    | 84790       | TUBA1C       | 1553  | 28.469   | 14.6569  | 0.957816  | 0.00045 | 0.0106989 |
| NM_181077.3    | 23015       | GOLGA8A      | 4264  | 15.1018  | 27.2026  | -0.849023 | 0.00045 | 0.0106989 |
| NM_000168.5    | 2737        | GLI3         | 8215  | 3.49226  | 6.43156  | -0.881007 | 0.00045 | 0.0106989 |
| NM_006228.3    | 5368        | PNOC         | 1196  | 3.49132  | 0.867359 | 2.00907   | 0.00045 | 0.0106989 |
| NM_002250.2    | 3783        | KCNN4        | 2240  | 4.41996  | 1.674    | 1.40073   | 0.00045 | 0.0106989 |
| TCONS_00234151 | XLOC_019814 | -            | 4203  | 0.565797 | 1.63031  | -1.5268   | 0.0005  | 0.0116249 |
| NM_001037160.2 | 192668      | CYS1         | 2719  | 2.09495  | 5.23765  | -1.32201  | 0.0005  | 0.0116249 |
| NM_005668.4    | 7903        | ST8SIA4      | 6320  | 17.4191  | 9.68114  | 0.847424  | 0.0005  | 0.0116249 |
| NM_025015.2    | 259217      | HSPA12A      | 5722  | 1.6324   | 3.58952  | -1.1368   | 0.0005  | 0.0116249 |
| NM_012400.2    | 26279       | PLA2G2D      | 2630  | 1.58886  | 0.467278 | 1.76564   | 0.0005  | 0.0116249 |
| NM_012413.3    | 25797       | QPCT         | 1703  | 9.90897  | 4.26102  | 1.21754   | 0.0005  | 0.0116249 |
| NM_000396.3    | 1513        | CTSK         | 1810  | 58.0294  | 127.079  | -1.13087  | 0.0005  | 0.0116249 |
| TCONS_00012664 | XLOC_001501 | -            | 1925  | 0.393922 | 1.65222  | -2.06842  | 0.0005  | 0.0116249 |
| TCONS_00180182 | XLOC_015712 | -            | 1504  | 0.2368   | 1.70663  | -2.84941  | 0.0005  | 0.0116249 |
| NM_001098623.1 | 84033       | OBSCN        | 24030 | 0.525467 | 1.33465  | -1.34479  | 0.0005  | 0.0116249 |
| NM_000231.2    | 6445        | SGCG         | 1655  | 0.216968 | 1.60134  | -2.88372  | 0.0005  | 0.0116249 |
| NM_014398.3    | 27074       | LAMP3        | 3341  | 8.24553  | 4.09786  | 1.00874   | 0.0005  | 0.0116249 |
| NM_001031683.2 | 3437        | IFIT3        | 2454  | 40.5776  | 17.1504  | 1.24244   | 0.0005  | 0.0116249 |
| NM_032679.2    | 84765       | ZNF577       | 3096  | 5.49141  | 11.5661  | -1.07465  | 0.0005  | 0.0116249 |
| NM_001792.3    | 1000        | CDH2         | 4367  | 2.49161  | 5.61369  | -1.17187  | 0.0005  | 0.0116249 |
| NM_017424.2    | 51816       | CECR1        | 3927  | 23.5747  | 9.39168  | 1.32778   | 0.0005  | 0.0116249 |
| NM_021800.2    | 56521       | DNAJC12      | 1212  | 3.9366   | 0.426096 | 3.2077    | 0.0005  | 0.0116249 |
| NM_018445.4    | 55829       | SELS         | 1234  | 55.8223  | 27.1305  | 1.04092   | 0.0005  | 0.0116249 |
| NM_003514.2    | 8336        | HIST1H2AM    | 487   | 75.3388  | 32.2639  | 1.22347   | 0.0005  | 0.0116249 |
| TCONS_00272364 | XLOC_022448 | -            | 770   | 20.8288  | 7.01655  | 1.56975   | 0.0005  | 0.0116249 |
| NM_052843.2    | 84033       | OBSCN        | 20402 | 0.74862  | 1.81462  | -1.27736  | 0.0005  | 0.0116249 |
| NM_005335.4    | 3059        | HCLS1        | 2033  | 62.7727  | 33.2565  | 0.916501  | 0.00055 | 0.0124813 |
| NM_194071.2    | 64764       | CREB3L2      | 7455  | 25.6763  | 14.7643  | 0.798327  | 0.00055 | 0.0124813 |
| NM_014791.2    | 9833        | MELK         | 2439  | 2.86879  | 0.952747 | 1.59028   | 0.00055 | 0.0124813 |
| NM_001129908.2 | 729085      | FAM198A      | 3433  | 1.54762  | 3.76574  | -1.28288  | 0.00055 | 0.0124813 |
| NM_002825.5    | 5764        | PTN          | 1549  | 33.1337  | 60.3928  | -0.866077 | 0.00055 | 0.0124813 |
| NM_145252.2    | 124220      | ZG16B        | 828   | 142.959  | 61.1025  | 1.2263    | 0.00055 | 0.0124813 |
| NM_001113490.1 | 154796      | AMOT         | 6945  | 6.06735  | 12.2304  | -1.01133  | 0.00055 | 0.0124813 |
| NM_152864.3    | 128414      | NKAIN4       | 1430  | 0.66951  | 2.45336  | -1.87358  | 0.00055 | 0.0124813 |
| NM_021064.4    | 8969        | HIST1H2AG    | 498   | 66.2763  | 29.175   | 1.18376   | 0.00055 | 0.0124813 |
| NM_182920.1    | 56999       | ADAMTS9      | 7313  | 6.44703  | 11.7794  | -0.869562 | 0.00055 | 0.0124813 |
| NM_004049.3    | 597         | BCL2A1       | 887   | 14.7406  | 4.45226  | 1.72719   | 0.00055 | 0.0124813 |
| NM_001362.3    | 1735        | DIO3         | 2102  | 2.70345  | 0.849685 | 1.6698    | 0.00055 | 0.0124813 |
| NM_005221.5    | 1749        | DLX5         | 1424  | 0.861593 | 3.08079  | -1.83822  | 0.00055 | 0.0124813 |
| NM_003468.3    | 7855        | FZD5         | 6564  | 5.57217  | 10.1758  | -0.868836 | 0.00055 | 0.0124813 |
| NM_015444.2    | 25907       | TMEM158      | 1859  | 2.17294  | 0.548307 | 1.98659   | 0.00055 | 0.0124813 |
| NM_030641.3    | 80830       | APOL6        | 10139 | 67.834   | 31.8179  | 1.09217   | 0.00055 | 0.0124813 |
| NM_005080.3    | 7494        | XBP1         | 1820  | 436.087  | 168.768  | 1.36957   | 0.00055 | 0.0124813 |
| NM_001242908.1 | 284654      | RSPO1        | 2910  | 5.62266  | 12.2863  | -1.12772  | 0.00055 | 0.0124813 |
| NM_138780.2    | 94122       | SYTL5        | 4726  | 4.09938  | 1.08603  | 1.91634   | 0.00055 | 0.0124813 |
| NM_024420.2    | 5321        | PLA2G4A      | 2928  | 21.8761  | 11.9493  | 0.872426  | 0.00055 | 0.0124813 |
| NM_001793.4    | 1001        | CDH3         | 4276  | 16.3987  | 8.94233  | 0.874856  | 0.00055 | 0.0124813 |
| NM_002951.3    | 6185        | RPN2         | 2508  | 94.0982  | 52.148   | 0.851556  | 0.00055 | 0.0124813 |

|                |             |           |       |          |          |           |         |           |
|----------------|-------------|-----------|-------|----------|----------|-----------|---------|-----------|
| NM_032184.1    | 84144       | SYDE2     | 4711  | 4.40173  | 8.36443  | -0.926196 | 0.00055 | 0.0124813 |
| NM_205855.3    | 389558      | FAM180A   | 1801  | 0.856059 | 3.18214  | -1.89421  | 0.0006  | 0.013408  |
| NM_000683.3    | 152         | ADRA2C    | 1958  | 1.9681   | 5.46691  | -1.47392  | 0.0006  | 0.013408  |
| NM_001194986.1 | 388630      | LOC388630 | 7029  | 0.314465 | 0.885073 | -1.49289  | 0.0006  | 0.013408  |
| NM_001747.2    | 822         | CAPG      | 1442  | 32.8522  | 17.5555  | 0.904069  | 0.0006  | 0.013408  |
| NM_152750.4    | 222256      | CDHR3     | 6500  | 27.2359  | 50.6512  | -0.895088 | 0.0006  | 0.013408  |
| NM_002408.3    | 4247        | MGAT2     | 2711  | 35.0707  | 19.6615  | 0.834889  | 0.0006  | 0.013408  |
| NM_003004.2    | 6398        | SECTM1    | 2282  | 7.55129  | 3.23225  | 1.22419   | 0.0006  | 0.013408  |
| TCONS_00192180 | XLOC_016641 | -         | 1912  | 1.6858   | 0.372616 | 2.17768   | 0.0006  | 0.013408  |
| NM_033278.2    | 10612       | TRIM3     | 2872  | 2.47889  | 5.67588  | -1.19515  | 0.0006  | 0.013408  |
| NM_002539.1    | 4953        | ODC1      | 2062  | 40.4057  | 22.4983  | 0.844744  | 0.0006  | 0.013408  |
| NM_144973.3    | 160518      | DENND5B   | 9391  | 10.101   | 5.61932  | 0.846035  | 0.0006  | 0.013408  |
| NM_001080508.1 | 9096        | TBX18     | 4070  | 2.66174  | 5.73194  | -1.10665  | 0.0006  | 0.013408  |
| NM_002610.3    | 5163        | PDK1      | 4576  | 43.9574  | 9.17787  | 2.25988   | 0.0006  | 0.013408  |
| NM_152744.3    | 221935      | SDK1      | 10397 | 4.77616  | 8.73352  | -0.870712 | 0.0006  | 0.013408  |
| NM_000820.2    | 2621        | GAS6      | 2505  | 17.3378  | 31.4432  | -0.858825 | 0.0006  | 0.013408  |
| NM_002627.4    | 5214        | PFKP      | 2657  | 24.1835  | 13.2778  | 0.865005  | 0.0006  | 0.013408  |
| NM_014141.5    | 26047       | CNTNAP2   | 9894  | 0.454973 | 1.14194  | -1.32763  | 0.0006  | 0.013408  |
| NM_019609.4    | 56265       | CPXM1     | 2400  | 34.8521  | 62.6989  | -0.847192 | 0.0006  | 0.013408  |
| TCONS_00259832 | XLOC_021398 | -         | 724   | 5.1404   | 0.503714 | 3.3512    | 0.00065 | 0.0142695 |
| NM_001025598.1 | 257106      | ARHGAP30  | 4425  | 15.7537  | 8.74023  | 0.849952  | 0.00065 | 0.0142695 |
| NM_003564.1    | 8407        | TAGLN2    | 1360  | 130.903  | 73.5734  | 0.831245  | 0.00065 | 0.0142695 |
| TCONS_00254192 | XLOC_021827 | -         | 2082  | 0.674926 | 2.38035  | -1.81837  | 0.00065 | 0.0142695 |
| NM_004585.3    | 5920        | RARRES3   | 765   | 118.171  | 64.0438  | 0.88374   | 0.00065 | 0.0142695 |
| NM_017923.3    | 55016       | MARCH1    | 5389  | 24.0092  | 13.0466  | 0.879915  | 0.00065 | 0.0142695 |
| NM_031455.3    | 83643       | CCDC3     | 2738  | 31.0493  | 56.3623  | -0.860168 | 0.00065 | 0.0142695 |
| NM_001289.4    | 1193        | CLIC2     | 2686  | 17.2866  | 9.31415  | 0.89216   | 0.00065 | 0.0142695 |
| NM_207361.4    | 341640      | FREM2     | 16163 | 3.11999  | 5.68093  | -0.864583 | 0.00065 | 0.0142695 |
| NM_021018.2    | 8968        | HIST1H3F  | 466   | 25.8534  | 7.88994  | 1.71226   | 0.00065 | 0.0142695 |
| NM_080489.4    | 27111       | SDCBP2    | 1581  | 4.17642  | 1.00872  | 2.04974   | 0.00065 | 0.0142695 |
| NM_173549.2    | 203111      | C8orf47   | 1550  | 12.5778  | 26.9158  | -1.09757  | 0.00065 | 0.0142695 |
| NM_198428.2    | 27241       | BBS9      | 4019  | 15.278   | 27.5062  | -0.8483   | 0.00065 | 0.0142695 |
| NM_018990.3    | 54440       | SASH3     | 2694  | 15.6595  | 7.6961   | 1.02484   | 0.00065 | 0.0142695 |
| NM_025227.1    | 80341       | BPIL1     | 1897  | 1.44468  | 0.202507 | 2.8347    | 0.00065 | 0.0142695 |
| NM_006808.2    | 10952       | SEC61B    | 562   | 82.3147  | 41.3159  | 0.994454  | 0.00065 | 0.0142695 |
| NM_001135733.1 | 94241       | TP53INP1  | 5652  | 52.3853  | 23.9929  | 1.12655   | 0.0007  | 0.015106  |
| NM_000336.2    | 6338        | SCNN1B    | 2597  | 10.0763  | 4.76613  | 1.08007   | 0.0007  | 0.015106  |
| NM_001001395.1 | 55885       | LMO3      | 3450  | 0.585699 | 3.07721  | -2.39339  | 0.0007  | 0.015106  |
| NM_018836.3    | 55966       | AJAP1     | 2923  | 1.05643  | 3.15856  | -1.58007  | 0.0007  | 0.015106  |
| NM_019016.2    | 192666      | KRT24     | 1881  | 1.71115  | 0.170365 | 3.32826   | 0.0007  | 0.015106  |
| NM_002046.3    | 2597        | GAPDH     | 1310  | 579.618  | 290.794  | 0.995108  | 0.0007  | 0.015106  |
| NM_015461.2    | 25925       | ZNF521    | 4971  | 7.74157  | 14.1903  | -0.874204 | 0.0007  | 0.015106  |
| NM_001200049.1 | 54777       | C10orf92  | 3164  | 1.94165  | 4.63382  | -1.25492  | 0.0007  | 0.015106  |
| NM_004273.4    | 9469        | CHST3     | 6973  | 4.81123  | 8.60662  | -0.839043 | 0.0007  | 0.015106  |
| NM_001130058.1 | 204962      | SLC44A5   | 3894  | 0.334828 | 1.35922  | -2.02128  | 0.0007  | 0.015106  |
| NM_001152.4    | 292         | SLC25A5   | 1351  | 79.9183  | 45.4862  | 0.813096  | 0.0007  | 0.015106  |
| NM_002612.3    | 5166        | PDK4      | 3700  | 26.9624  | 51.8992  | -0.944764 | 0.0007  | 0.015106  |
| NM_000698.2    | 240         | ALOX5     | 2554  | 13.8077  | 6.86329  | 1.0085    | 0.0007  | 0.015106  |
| NM_152666.2    | 200150      | PLD5      | 3305  | 0.562996 | 3.89267  | -2.78956  | 0.0007  | 0.015106  |
| NM_003519.3    | 8340        | HIST1H2BL | 453   | 23.7767  | 7.87515  | 1.59417   | 0.0007  | 0.015106  |
| NM_024324.3    | 79174       | CRELD2    | 1428  | 21.7835  | 10.57    | 1.04327   | 0.0007  | 0.015106  |
| NM_178012.4    | 347733      | TUBB2B    | 2019  | 1.94341  | 0.574239 | 1.75887   | 0.00075 | 0.0159498 |
| NM_001110514.1 | 57593       | EBF4      | 2911  | 0.999062 | 2.62065  | -1.39128  | 0.00075 | 0.0159498 |
| NM_003474.4    | 8038        | ADAM12    | 6093  | 6.3368   | 11.5608  | -0.867415 | 0.00075 | 0.0159498 |



|                   |                   |              |       |          |          |           |         |           |
|-------------------|-------------------|--------------|-------|----------|----------|-----------|---------|-----------|
| NM_004574.3       | 5414              | SEPT4        | 1856  | 3.4041   | 12.6001  | -1.88809  | 0.00075 | 0.0159498 |
| NM_000061.2       | 695               | BTK          | 2611  | 12.1575  | 6.12768  | 0.988437  | 0.00075 | 0.0159498 |
| NM_001013647.1    | 646851            | LOC646851    | 10322 | 2.98194  | 5.49157  | -0.880965 | 0.00075 | 0.0159498 |
| NM_005618.3       | 28514             | DLL1         | 3310  | 2.19691  | 4.87823  | -1.15089  | 0.00075 | 0.0159498 |
| TCONS_00266591    | XLOC_023026       | -            | 1890  | 0.4354   | 1.58043  | -1.85991  | 0.00075 | 0.0159498 |
| NM_004288.4       | 9595              | CYTIP        | 2210  | 48.1469  | 26.2065  | 0.877521  | 0.00075 | 0.0159498 |
| NM_001608.3       | 33                | ACADL        | 2492  | 0.727229 | 2.24865  | -1.62858  | 0.00075 | 0.0159498 |
| NM_001001872.2    | 145407            | C14orf37     | 3082  | 4.22888  | 8.73804  | -1.04703  | 0.00075 | 0.0159498 |
| NM_012409.2       | 23627             | PRND         | 3980  | 0.375937 | 1.15811  | -1.6232   | 0.00075 | 0.0159498 |
| NM_003719.3       | 8622              | PDE8B        | 4405  | 3.69607  | 12.2651  | -1.7305   | 0.00075 | 0.0159498 |
| NM_001167738.1    | 89796             | NAV1         | 11683 | 5.59882  | 10.3894  | -0.89192  | 0.00075 | 0.0159498 |
| NM_003062.2       | 6586              | SLIT3        | 5380  | 6.12088  | 11.258   | -0.879137 | 0.00075 | 0.0159498 |
| NM_001031709.2    | 55328             | RNLS         | 2416  | 5.18267  | 11.2693  | -1.12063  | 0.00075 | 0.0159498 |
| 3505              | 3505              | -            | 1188  | 2.29208  | 0.520062 | 2.1399    | 0.00075 | 0.0159498 |
| NM_016472.3       | 51527             | C14orf129    | 2072  | 21.4193  | 11.4352  | 0.905437  | 0.00075 | 0.0159498 |
| NM_080596.1       | 85235             | HIST1H2AH    | 439   | 34.9728  | 13.0957  | 1.41714   | 0.00075 | 0.0159498 |
| NM_032291.2       | 84251             | SGIP1        | 4694  | 2.73182  | 1.11917  | 1.28743   | 0.00075 | 0.0159498 |
| NM_018407.4       | 55353             | LAPTM4B      | 2238  | 28.0431  | 15.4569  | 0.859399  | 0.0008  | 0.0168217 |
| NM_173535.2       | 165530            | CLEC4F       | 2475  | 0.774704 | 2.46907  | -1.67225  | 0.0008  | 0.0168217 |
| TCONS_00265890    | XLOC_022389       | -            | 2835  | 0.361976 | 1.30767  | -1.85303  | 0.0008  | 0.0168217 |
| NM_020208.3       | 54716             | SLC6A20      | 5432  | 4.27097  | 2.04512  | 1.06237   | 0.0008  | 0.0168217 |
| NM_144665.2       | 143686            | SESN3        | 1987  | 60.62    | 104.963  | -0.792016 | 0.0008  | 0.0168217 |
| ENST00000558411.1 | ENSG00000259641.1 | RP11-279F6.3 | 2121  | 0.248418 | 1.19357  | -2.26445  | 0.0008  | 0.0168217 |
| NM_032646.5       | 94015             | TTYH2        | 3447  | 1.83208  | 4.85409  | -1.40572  | 0.0008  | 0.0168217 |
| NM_181644.4       | 148808            | MFSD4        | 4088  | 8.60961  | 4.50309  | 0.935034  | 0.0008  | 0.0168217 |
| NM_002424.2       | 4317              | MMP8         | 3056  | 0.13973  | 0.880773 | -2.65613  | 0.0008  | 0.0168217 |
| NM_015065.2       | 23086             | EXPH5        | 10187 | 22.3952  | 40.9518  | -0.870737 | 0.0008  | 0.0168217 |
| NM_005761.2       | 10154             | PLXNC1       | 7346  | 17.8052  | 10.1593  | 0.809489  | 0.0008  | 0.0168217 |
| NM_001254.3       | 990               | CDC6         | 3053  | 2.2121   | 0.813722 | 1.44281   | 0.0008  | 0.0168217 |
| NM_153274.2       | 266675            | BEST4        | 2096  | 1.20193  | 3.22982  | -1.4261   | 0.0008  | 0.0168217 |
| NM_177455.3       | 168620            | BHLHA15      | 706   | 6.56593  | 1.9044   | 1.78567   | 0.0008  | 0.0168217 |
| NM_152513.3       | 150365            | MEI1         | 4006  | 2.28946  | 0.889458 | 1.36401   | 0.0008  | 0.0168217 |
| NM_001062.3       | 6947              | TCN1         | 1567  | 59.922   | 24.9139  | 1.26613   | 0.0008  | 0.0168217 |
| NM_018402.1       | 55801             | IL26         | 1047  | 2.5518   | 0.573828 | 2.15282   | 0.0008  | 0.0168217 |
| TCONS_00241593    | XLOC_020747       | -            | 2844  | 1.79828  | 0.30483  | 2.56054   | 0.00085 | 0.0176689 |
| NM_004223.4       | 9246              | UBE2L6       | 1261  | 70.8983  | 39.8198  | 0.832266  | 0.00085 | 0.0176689 |
| NM_000618.3       | 3479              | IGF1         | 7321  | 6.99408  | 3.57479  | 0.968276  | 0.00085 | 0.0176689 |
| TCONS_00153471    | XLOC_013915       | -            | 2214  | 2.07115  | 0.563462 | 1.87804   | 0.00085 | 0.0176689 |
| NM_001077427.2    | 116372            | LYPD1        | 1974  | 4.64666  | 12.782   | -1.45985  | 0.00085 | 0.0176689 |
| NM_001172624.1    | 4756              | NEO1         | 7055  | 11.2077  | 20.2755  | -0.855251 | 0.00085 | 0.0176689 |
| NM_031456.3       | 10517             | FBXW10       | 3439  | 1.51755  | 3.57936  | -1.23796  | 0.00085 | 0.0176689 |
| NM_001008784.2    | 344807            | CD200R1L     | 1296  | 0.275457 | 2.00386  | -2.86288  | 0.00085 | 0.0176689 |
| NM_021965.3       | 5239              | PGM5         | 3338  | 5.92989  | 11.5312  | -0.959459 | 0.00085 | 0.0176689 |
| 28834             | 28834             | -            | 318   | 65.6492  | 17.1441  | 1.93706   | 0.00085 | 0.0176689 |
| NM_003737.2       | 8642              | DCHS1        | 10756 | 3.13831  | 5.60928  | -0.837831 | 0.00085 | 0.0176689 |
| NM_002266.2       | 3838              | KPNA2        | 1980  | 15.3342  | 7.89084  | 0.958505  | 0.00085 | 0.0176689 |
| NM_014265.4       | 10863             | ADAM28       | 3220  | 125.277  | 61.258   | 1.03215   | 0.0009  | 0.0184743 |
| NM_016267.3       | 51442             | VGLL1        | 1215  | 0.738734 | 2.72714  | -1.88426  | 0.0009  | 0.0184743 |
| NM_004833.1       | 9447              | AIM2         | 1484  | 10.6108  | 4.48489  | 1.24239   | 0.0009  | 0.0184743 |
| NM_003511.2       | 8332              | HIST1H2AL    | 470   | 25.4854  | 8.03838  | 1.66469   | 0.0009  | 0.0184743 |
| NM_000528.3       | 4125              | MAN2B1       | 3224  | 26.2749  | 14.3094  | 0.876721  | 0.0009  | 0.0184743 |
| NM_021052.2       | 3012              | HIST1H2AE    | 564   | 95.4411  | 49.8457  | 0.937142  | 0.0009  | 0.0184743 |
| TCONS_00156810    | XLOC_015004       | -            | 2828  | 2.02673  | 4.75247  | -1.22953  | 0.0009  | 0.0184743 |
| NM_032960.2       | 9261              | MAPKAPK2     | 3052  | 25.1577  | 13.431   | 0.905433  | 0.0009  | 0.0184743 |

|                |             |              |       |          |          |           |         |           |
|----------------|-------------|--------------|-------|----------|----------|-----------|---------|-----------|
| NM_002298.4    | 3936        | LCP1         | 3790  | 105.497  | 54.3309  | 0.957356  | 0.0009  | 0.0184743 |
| NM_138806.3    | 131450      | CD200R1      | 2272  | 9.34796  | 4.05556  | 1.20475   | 0.0009  | 0.0184743 |
| NM_014631.2    | 9644        | SH3PXD2A     | 11247 | 7.90235  | 13.7492  | -0.798989 | 0.0009  | 0.0184743 |
| NM_005024.1    | 5273        | SERPINB10    | 1194  | 1.07376  | 3.85368  | -1.84356  | 0.0009  | 0.0184743 |
| NM_003238.3    | 7042        | TGFB2        | 5870  | 4.7119   | 8.80374  | -0.901806 | 0.00095 | 0.0192772 |
| NM_003006.4    | 6404        | SELPLG       | 2573  | 14.2582  | 7.42515  | 0.941299  | 0.00095 | 0.0192772 |
| NM_000216.2    | 3730        | KAL1         | 6314  | 9.11964  | 16.305   | -0.838269 | 0.00095 | 0.0192772 |
| NM_002445.3    | 4481        | MSR1         | 2960  | 22.435   | 9.84989  | 1.18757   | 0.00095 | 0.0192772 |
| NM_013227.3    | 176         | ACAN         | 8840  | 0.270111 | 1.97711  | -2.87177  | 0.00095 | 0.0192772 |
| NM_005409.4    | 6373        | CXCL11       | 1606  | 25.3491  | 6.67678  | 1.92471   | 0.00095 | 0.0192772 |
| NM_012081.5    | 22936       | ELL2         | 6046  | 43.621   | 24.7787  | 0.815919  | 0.00095 | 0.0192772 |
| NM_007107.3    | 6747        | SSR3         | 3716  | 83.7081  | 48.0381  | 0.80119   | 0.00095 | 0.0192772 |
| NM_152862.1    | 10109       | ARPC2        | 1448  | 178.896  | 102.67   | 0.801107  | 0.00095 | 0.0192772 |
| NM_023073.3    | 65250       | C5orf42      | 11199 | 18.5595  | 33.5119  | -0.852517 | 0.00095 | 0.0192772 |
| NM_005508.4    | 1233        | CCR4         | 1657  | 7.70633  | 3.11228  | 1.30807   | 0.00095 | 0.0192772 |
| NM_001168368.1 | 57452       | GALNTL1      | 4309  | 5.01003  | 10.4107  | -1.05517  | 0.001   | 0.0199964 |
| NM_007038.3    | 11096       | ADAMTS5      | 9663  | 3.5609   | 6.34585  | -0.833573 | 0.001   | 0.0199964 |
| NM_152793.2    | 222166      | C7orf41      | 5814  | 17.0546  | 29.7241  | -0.801472 | 0.001   | 0.0199964 |
| NM_152989.2    | 6660        | SOX5         | 4546  | 2.58735  | 5.94106  | -1.19924  | 0.001   | 0.0199964 |
| NM_006639.2    | 10800       | CYSLTR1      | 1514  | 15.7628  | 7.66382  | 1.04039   | 0.001   | 0.0199964 |
| NM_001142504.2 | 9754        | STARD8       | 4840  | 2.54048  | 5.84299  | -1.20161  | 0.001   | 0.0199964 |
| NM_012450.2    | 26266       | SLC13A4      | 2896  | 0.459755 | 1.41974  | -1.62669  | 0.001   | 0.0199964 |
| NM_002168.2    | 3418        | IDH2         | 1733  | 53.3653  | 30.9814  | 0.7845    | 0.001   | 0.0199964 |
| NM_000362.4    | 7078        | TIMP3        | 5486  | 30.6424  | 54.3823  | -0.827606 | 0.001   | 0.0199964 |
| NM_080593.2    | 85236       | HIST1H2BK    | 839   | 85.0896  | 45.2578  | 0.910816  | 0.001   | 0.0199964 |
| TCONS_00297361 | XLOC_024773 | -            | 1955  | 0.783058 | 2.39698  | -1.61402  | 0.001   | 0.0199964 |
| NM_003966.2    | 9037        | SEMA5A       | 11808 | 14.6351  | 26.5099  | -0.857097 | 0.001   | 0.0199964 |
| NM_020813.2    | 57573       | ZNF471       | 4967  | 4.45557  | 8.26025  | -0.890575 | 0.001   | 0.0199964 |
| NM_001843.2    | 1272        | CNTN1        | 3427  | 12.8639  | 22.902   | -0.832144 | 0.001   | 0.0199964 |
| NM_001584.2    | 744         | MPPED2       | 2402  | 5.38066  | 11.8013  | -1.13309  | 0.001   | 0.0199964 |
| XM_003118524.1 | 389197      | C4orf50      | 3184  | 0.533624 | 1.56884  | -1.5558   | 0.001   | 0.0199964 |
| XM_003403521.1 | 100652860   | LOC100652860 | 1520  | 3.23298  | 7.85582  | -1.2809   | 0.00105 | 0.0207193 |
| NM_004836.5    | 9451        | EIF2AK3      | 4648  | 32.7705  | 19.1087  | 0.778173  | 0.00105 | 0.0207193 |
| NM_005270.4    | 2736        | GLI2         | 6769  | 0.455364 | 1.13125  | -1.31282  | 0.00105 | 0.0207193 |
| NM_005507.2    | 1072        | CFL1         | 1260  | 147.256  | 85.6049  | 0.782559  | 0.00105 | 0.0207193 |
| NM_006843.2    | 10993       | SDS          | 1605  | 1.38941  | 0.322729 | 2.10607   | 0.00105 | 0.0207193 |
| NM_004588.4    | 6327        | SCN2B        | 4922  | 0.610597 | 1.60203  | -1.39161  | 0.00105 | 0.0207193 |
| NM_182497.3    | 125115      | KRT40        | 1938  | 2.93038  | 1.0394   | 1.49535   | 0.00105 | 0.0207193 |
| NM_001428.3    | 2023        | ENO1         | 2187  | 134.316  | 74.8777  | 0.843021  | 0.00105 | 0.0207193 |
| NM_002208.4    | 3682        | ITGAE        | 3861  | 6.84969  | 3.1224   | 1.13338   | 0.00105 | 0.0207193 |
| NM_001199622.1 | 135112      | NCOA7        | 4052  | 36.6319  | 3.32381  | 3.46219   | 0.00105 | 0.0207193 |
| NM_207303.2    | 26033       | ATRNL1       | 8732  | 5.13191  | 8.98249  | -0.807618 | 0.00105 | 0.0207193 |
| NM_002338.3    | 4045        | LSAMP        | 9478  | 7.39798  | 12.7356  | -0.783666 | 0.0011  | 0.0214605 |
| NM_030938.3    | 81671       | VMP1         | 2176  | 73.8535  | 42.9597  | 0.781681  | 0.0011  | 0.0214605 |
| NM_002988.2    | 6362        | CCL18        | 770   | 3.92204  | 0.653166 | 2.58608   | 0.0011  | 0.0214605 |
| NM_033632.2    | 55294       | FBXW7        | 3896  | 40.6381  | 23.5459  | 0.787354  | 0.0011  | 0.0214605 |
| NM_005320.2    | 3007        | HIST1H1D     | 777   | 113.451  | 60.976   | 0.895762  | 0.0011  | 0.0214605 |
| NM_016306.4    | 51726       | DNAJB11      | 1689  | 54.5798  | 31.4398  | 0.795777  | 0.0011  | 0.0214605 |
| NM_145239.2    | 112476      | PRRT2        | 2567  | 1.48518  | 3.78784  | -1.35074  | 0.0011  | 0.0214605 |
| TCONS_00111412 | XLOC_009731 | -            | 2716  | 4.50001  | 9.19673  | -1.03119  | 0.0011  | 0.0214605 |
| NM_003329.2    | 7295        | TXN          | 508   | 349.612  | 206.195  | 0.76174   | 0.0011  | 0.0214605 |
| TCONS_00233526 | XLOC_020559 | -            | 4976  | 6.07835  | 14.7785  | -1.28175  | 0.0011  | 0.0214605 |
| NM_004267.3    | 9435        | CHST2        | 3043  | 4.15804  | 1.83738  | 1.17825   | 0.00115 | 0.0222874 |
| TCONS_00314598 | XLOC_026580 | -            | 3111  | 1.35404  | 0.161749 | 3.06544   | 0.00115 | 0.0222874 |

|                |             |           |       |          |          |           |         |           |
|----------------|-------------|-----------|-------|----------|----------|-----------|---------|-----------|
| NM_001144759.1 | 23187       | PHLDB1    | 5298  | 5.39679  | 9.73775  | -0.851486 | 0.00115 | 0.0222874 |
| NM_018058.5    | 55118       | CRTAC1    | 2713  | 0.293499 | 2.46175  | -3.06826  | 0.00115 | 0.0222874 |
| NM_152377.2    | 127795      | C1orf87   | 2028  | 16.2069  | 29.0239  | -0.840636 | 0.00115 | 0.0222874 |
| TCONS_00293640 | XLOC_025525 | -         | 6270  | 1.99941  | 4.03428  | -1.01274  | 0.0012  | 0.0230244 |
| NM_001908.3    | 1508        | CTSB      | 3783  | 118.423  | 61.0981  | 0.95475   | 0.0012  | 0.0230244 |
| NM_002788.3    | 5684        | PSMA3     | 998   | 78.6893  | 45.6207  | 0.786479  | 0.0012  | 0.0230244 |
| NM_007237.4    | 11262       | SP140     | 3250  | 10.4627  | 5.1974   | 1.00939   | 0.0012  | 0.0230244 |
| NM_020672.1    | 57402       | S100A14   | 1043  | 27.7038  | 13.6965  | 1.01628   | 0.0012  | 0.0230244 |
| NM_001199138.1 | 58484       | NLRC4     | 3360  | 3.11694  | 1.20491  | 1.3712    | 0.0012  | 0.0230244 |
| NM_001006605.3 | 388650      | FAM69A    | 2599  | 20.0278  | 11.2551  | 0.831431  | 0.0012  | 0.0230244 |
| NM_199420.3    | 10721       | POLQ      | 8780  | 2.15647  | 4.05829  | -0.912203 | 0.0012  | 0.0230244 |
| NM_014518.2    | 7772        | ZNF229    | 4964  | 1.40975  | 2.9793   | -1.07953  | 0.0012  | 0.0230244 |
| TCONS_00217976 | XLOC_018953 | -         | 2135  | 0.574987 | 1.93847  | -1.75332  | 0.00125 | 0.02372   |
| NM_000275.2    | 4948        | OCA2      | 3140  | 0.665624 | 1.91235  | -1.52257  | 0.00125 | 0.02372   |
| NM_000847.4    | 2940        | GSTA3     | 915   | 1.26298  | 4.12801  | -1.70862  | 0.00125 | 0.02372   |
| NM_001025195.1 | 1066        | CES1      | 2013  | 22.0134  | 56.7756  | -1.36689  | 0.00125 | 0.02372   |
| NM_001431.3    | 2037        | EPB41L2   | 4457  | 20.9575  | 40.6145  | -0.954529 | 0.00125 | 0.02372   |
| NM_005306.2    | 2867        | FFAR2     | 2053  | 1.82213  | 0.522918 | 1.80097   | 0.00125 | 0.02372   |
| NM_152309.2    | 118788      | PIK3AP1   | 4811  | 19.6488  | 10.9904  | 0.838195  | 0.00125 | 0.02372   |
| NM_006469.4    | 10625       | IVNS1ABP  | 4199  | 87.5578  | 49.9464  | 0.809855  | 0.00125 | 0.02372   |
| NM_005719.2    | 10094       | ARPC3     | 884   | 237.652  | 137.249  | 0.792055  | 0.00125 | 0.02372   |
| TCONS_00087753 | XLOC_007659 | -         | 5536  | 0.786727 | 1.82988  | -1.21782  | 0.00125 | 0.02372   |
| NM_000291.3    | 5230        | PGK1      | 2423  | 97.5128  | 57.1127  | 0.77178   | 0.0013  | 0.0244278 |
| NM_001145206.1 | 85379       | KIAA1671  | 10494 | 6.06938  | 10.728   | -0.821756 | 0.0013  | 0.0244278 |
| NM_015886.3    | 51050       | PI15      | 6732  | 2.41897  | 4.98907  | -1.04438  | 0.0013  | 0.0244278 |
| NM_004200.2    | 9066        | SYT7      | 4532  | 2.02056  | 0.831907 | 1.28026   | 0.0013  | 0.0244278 |
| NM_003525.2    | 8346        | HIST1H2BI | 437   | 60.0578  | 27.0655  | 1.1499    | 0.0013  | 0.0244278 |
| NM_001134363.1 | 282996      | RBM20     | 7233  | 2.37751  | 4.45379  | -0.905582 | 0.0013  | 0.0244278 |
| NM_006178.3    | 4905        | NSF       | 3983  | 31.1925  | 18.1373  | 0.782241  | 0.0013  | 0.0244278 |
| NM_177937.2    | 51280       | GOLM1     | 3080  | 50.4444  | 20.2156  | 1.31922   | 0.0013  | 0.0244278 |
| NM_005100.3    | 9590        | AKAP12    | 8434  | 21.3303  | 47.4702  | -1.15412  | 0.0013  | 0.0244278 |
| TCONS_00295272 | XLOC_025154 | -         | 2524  | 0.545096 | 1.61553  | -1.56742  | 0.0013  | 0.0244278 |
| NM_003037.2    | 6504        | SLAMF1    | 2001  | 6.94837  | 3.22793  | 1.10607   | 0.0013  | 0.0244278 |
| NM_018897.2    | 56171       | DNAH7     | 12394 | 24.3824  | 44.9611  | -0.882837 | 0.00135 | 0.0250595 |
| TCONS_00223831 | XLOC_018891 | -         | 5712  | 6.4722   | 2.34305  | 1.46587   | 0.00135 | 0.0250595 |
| NM_001629.3    | 241         | ALOX5AP   | 906   | 27.1364  | 13.3778  | 1.0204    | 0.00135 | 0.0250595 |
| NM_021240.2    | 58524       | DMRT3     | 2184  | 3.33897  | 7.38812  | -1.1458   | 0.00135 | 0.0250595 |
| NM_001185.3    | 563         | AZGP1     | 1265  | 60.1863  | 27.3472  | 1.13804   | 0.00135 | 0.0250595 |
| NM_015693.3    | 27152       | INTU      | 3275  | 11.515   | 20.2313  | -0.813071 | 0.00135 | 0.0250595 |
| NM_152380.2    | 6913        | TBX15     | 3495  | 1.1225   | 2.76104  | -1.2985   | 0.00135 | 0.0250595 |
| NM_014056.3    | 25994       | HIGD1A    | 2767  | 47.9312  | 28.3027  | 0.760024  | 0.00135 | 0.0250595 |
| NM_001127608.1 | 9413        | FAM189A2  | 2107  | 1.1574   | 4.11849  | -1.83123  | 0.00135 | 0.0250595 |
| NM_007210.3    | 11226       | GALNT6    | 4520  | 6.94078  | 3.5889   | 0.951555  | 0.00135 | 0.0250595 |
| NM_005022.2    | 5216        | PFN1      | 807   | 179.468  | 106.079  | 0.758591  | 0.00135 | 0.0250595 |
| NM_004289.6    | 9603        | NFE2L3    | 3711  | 33.1204  | 17.8602  | 0.890971  | 0.00135 | 0.0250595 |
| TCONS_00218085 | XLOC_019065 | -         | 2851  | 0.893646 | 2.29084  | -1.3581   | 0.00135 | 0.0250595 |
| NM_002705.4    | 5493        | PPL       | 6238  | 13.8095  | 23.0782  | -0.740865 | 0.00135 | 0.0250595 |
| NM_020873.5    | 57633       | LRRN1     | 3823  | 14.0396  | 7.7762   | 0.852362  | 0.00135 | 0.0250595 |
| NM_003269.3    | 7101        | NR2E1     | 3259  | 2.0176   | 4.65981  | -1.20763  | 0.00135 | 0.0250595 |
| NM_006290.2    | 7128        | TNFAIP3   | 4432  | 26.7074  | 15.3184  | 0.801976  | 0.00135 | 0.0250595 |
| NM_001013659.2 | 390927      | ZNF793    | 7121  | 2.49708  | 4.58164  | -0.87562  | 0.0014  | 0.0257815 |
| NM_005931.3    | 4277        | MICB      | 2483  | 5.26915  | 2.34162  | 1.17006   | 0.0014  | 0.0257815 |
| NM_005101.3    | 9636        | ISG15     | 667   | 23.4989  | 9.88108  | 1.24986   | 0.0014  | 0.0257815 |
| NM_002593.3    | 5118        | PCOLCE    | 1620  | 30.3273  | 54.0996  | -0.835002 | 0.0014  | 0.0257815 |

|                |             |              |       |          |          |           |         |           |
|----------------|-------------|--------------|-------|----------|----------|-----------|---------|-----------|
| NM_178172.3    | 338328      | GPIHBP1      | 2281  | 1.95069  | 4.58965  | -1.2344   | 0.00145 | 0.0264203 |
| TCONS_00052037 | XLOC_004301 | -            | 11166 | 1.79817  | 3.33356  | -0.890531 | 0.00145 | 0.0264203 |
| NM_004944.2    | 1776        | DNASE1L3     | 1463  | 10.271   | 19.5908  | -0.931603 | 0.00145 | 0.0264203 |
| NM_001276.2    | 1116        | CHI3L1       | 1837  | 2.65246  | 0.86636  | 1.61429   | 0.00145 | 0.0264203 |
| NM_006151.2    | 4025        | LPO          | 2979  | 2.05025  | 0.549473 | 1.89968   | 0.0015  | 0.0270821 |
| NM_016623.3    | 51571       | FAM49B       | 2196  | 38.1114  | 21.7082  | 0.811981  | 0.0015  | 0.0270821 |
| NM_000631.4    | 4689        | NCF4         | 1398  | 9.52919  | 3.12951  | 1.60641   | 0.0015  | 0.0270821 |
| NM_005380.6    | 4681        | NBL1         | 2026  | 88.0353  | 166.887  | -0.92272  | 0.0015  | 0.0270821 |
| XM_003118889.1 | 100506859   | LOC100506859 | 703   | 9.52558  | 22.1987  | -1.2206   | 0.0015  | 0.0270821 |
| NM_000405.4    | 2760        | GM2A         | 3690  | 33.2595  | 19.6752  | 0.757386  | 0.0015  | 0.0270821 |
| NM_014767.2    | 9806        | SPOCK2       | 5329  | 10.7684  | 6.15144  | 0.807813  | 0.0015  | 0.0270821 |
| NM_001165257.1 | 29106       | SCG3         | 3257  | 1.63918  | 0.588646 | 1.4775    | 0.0015  | 0.0270821 |
| NM_002443.3    | 4477        | MSMB         | 494   | 148.471  | 69.221   | 1.1009    | 0.00155 | 0.0278206 |
| NM_001128227.2 | 10020       | GENE         | 5298  | 18.5581  | 7.74155  | 1.26136   | 0.00155 | 0.0278206 |
| NM_001877.4    | 1380        | CR2          | 3993  | 1.07636  | 0.365179 | 1.55948   | 0.00155 | 0.0278206 |
| NM_001295.2    | 1230        | CCR1         | 2676  | 14.8614  | 8.05541  | 0.883537  | 0.00155 | 0.0278206 |
| NM_152632.3    | 170063      | CXorf22      | 3613  | 16.8435  | 28.8899  | -0.778376 | 0.00155 | 0.0278206 |
| TCONS_00092641 | XLOC_007763 | -            | 1842  | 2.33692  | 5.44236  | -1.21963  | 0.00155 | 0.0278206 |
| NM_002934.2    | 6036        | RNASE2       | 735   | 7.39762  | 1.89386  | 1.96573   | 0.00155 | 0.0278206 |
| TCONS_00196351 | XLOC_017552 | -            | 2737  | 0.522274 | 1.508    | -1.52976  | 0.00155 | 0.0278206 |
| NM_024572.2    | 79623       | GALNT14      | 2712  | 4.61289  | 2.08884  | 1.14297   | 0.0016  | 0.0284826 |
| TCONS_00196551 | XLOC_017715 | -            | 1840  | 0.725464 | 2.16441  | -1.577    | 0.0016  | 0.0284826 |
| NM_000730.2    | 886         | CCKAR        | 1682  | 0.177543 | 1.31598  | -2.8899   | 0.0016  | 0.0284826 |
| NM_017918.4    | 55013       | CCDC109B     | 1274  | 27.0918  | 14.6038  | 0.891513  | 0.0016  | 0.0284826 |
| TCONS_00281560 | XLOC_024256 | -            | 1326  | 0.519996 | 1.97159  | -1.92279  | 0.0016  | 0.0284826 |
| NM_138455.2    | 115908      | CTHRC1       | 1220  | 10.7615  | 4.83871  | 1.15318   | 0.00165 | 0.0290957 |
| TCONS_00001771 | XLOC_001339 | -            | 1501  | 0.310214 | 1.46284  | -2.23743  | 0.00165 | 0.0290957 |
| TCONS_00187975 | XLOC_016196 | -            | 614   | 0.787259 | 4.3203   | -2.45622  | 0.00165 | 0.0290957 |
| NM_032040.3    | 83987       | CCDC8        | 3334  | 3.14983  | 6.2283   | -0.983566 | 0.00165 | 0.0290957 |
| NM_199478.1    | 5354        | PLP1         | 2921  | 4.03874  | 8.45052  | -1.06513  | 0.00165 | 0.0290957 |
| TCONS_00049749 | XLOC_003979 | -            | 1775  | 0.399247 | 1.59804  | -2.00095  | 0.00165 | 0.0290957 |
| NM_003585.3    | 8447        | DOC2B        | 1075  | 5.70845  | 2.16193  | 1.40078   | 0.00165 | 0.0290957 |
| TCONS_00299616 | XLOC_024801 | -            | 2918  | 0.823028 | 2.09969  | -1.35116  | 0.00165 | 0.0290957 |
| NM_002862.3    | 5834        | PYGB         | 4131  | 20.6476  | 11.1422  | 0.889938  | 0.00165 | 0.0290957 |
| NM_020830.3    | 57590       | WDFY1        | 4607  | 67.8244  | 39.6932  | 0.772915  | 0.00165 | 0.0290957 |
| NM_002658.3    | 5328        | PLAU         | 2378  | 5.91869  | 2.54705  | 1.21645   | 0.00165 | 0.0290957 |
| NM_015719.3    | 50509       | COL5A3       | 6174  | 1.34373  | 2.80879  | -1.06371  | 0.0017  | 0.0297668 |
| NM_032242.3    | 5361        | PLXNA1       | 9066  | 4.87442  | 8.28885  | -0.765941 | 0.0017  | 0.0297668 |
| NM_001865.3    | 1347        | COX7A2       | 701   | 94.5744  | 54.0966  | 0.805911  | 0.0017  | 0.0297668 |
| NM_001172626.1 | 270         | AMPD1        | 2395  | 6.33604  | 1.01457  | 2.64271   | 0.0017  | 0.0297668 |
| TCONS_00250789 | XLOC_021670 | -            | 947   | 1.11207  | 3.67855  | -1.72589  | 0.0017  | 0.0297668 |
| NM_001004470.1 | 338596      | ST8SIA6      | 1398  | 5.52223  | 2.26557  | 1.28538   | 0.0017  | 0.0297668 |
| NM_005073.3    | 6564        | SLC15A1      | 3127  | 0.461299 | 1.34532  | -1.54418  | 0.00175 | 0.0304286 |
| NM_002207.2    | 3680        | ITGA9        | 3962  | 7.75131  | 13.4873  | -0.79909  | 0.00175 | 0.0304286 |
| NM_021066.2    | 8331        | HIST1H2AJ    | 439   | 28.1016  | 10.76    | 1.38497   | 0.00175 | 0.0304286 |
| NM_001031746.3 | 196740      | VSTM4        | 6354  | 5.42774  | 9.44469  | -0.799151 | 0.00175 | 0.0304286 |
| TCONS_00235118 | XLOC_019578 | -            | 2185  | 0.244712 | 0.95764  | -1.9684   | 0.00175 | 0.0304286 |
| TCONS_00302479 | XLOC_025340 | -            | 1300  | 0.996047 | 3.07309  | -1.62541  | 0.00175 | 0.0304286 |
| NM_030569.6    | 80760       | ITIH5        | 6749  | 3.22086  | 6.35474  | -0.980386 | 0.00175 | 0.0304286 |
| NM_001135170.1 | 114905      | C1QTNF7      | 4518  | 0.324526 | 2.92089  | -3.17     | 0.00175 | 0.0304286 |
| NM_004864.2    | 9518        | GDF15        | 1200  | 1.76635  | 0.431044 | 2.03486   | 0.0018  | 0.0310732 |
| NM_001394.6    | 1846        | DUSP4        | 5621  | 4.60363  | 2.17915  | 1.07901   | 0.0018  | 0.0310732 |
| NM_020436.3    | 57167       | SALL4        | 3486  | 0.436627 | 1.19812  | -1.4563   | 0.0018  | 0.0310732 |
| NM_021021.3    | 6641        | SNTB1        | 4975  | 11.7369  | 19.763   | -0.751759 | 0.0018  | 0.0310732 |

|                   |                   |          |       |          |          |           |         |           |
|-------------------|-------------------|----------|-------|----------|----------|-----------|---------|-----------|
| NM_001290.3       | 9079              | LDB2     | 2540  | 28.1854  | 54.161   | -0.942304 | 0.0018  | 0.0310732 |
| NM_172239.4       | 254958            | REXO1L1  | 7032  | 13.632   | 24.4886  | -0.845111 | 0.0018  | 0.0310732 |
| NM_018284.2       | 2635              | GBP3     | 3040  | 55.7273  | 32.6487  | 0.77136   | 0.0018  | 0.0310732 |
| NM_024164.5       | 64499             | TPSB2    | 1166  | 11.7505  | 5.04708  | 1.2192    | 0.0018  | 0.0310732 |
| NM_001005162.2    | 340980            | OR52B6   | 1008  | 0.659352 | 2.58288  | -1.96986  | 0.00185 | 0.0317167 |
| NM_001010905.1    | 352999            | C6orf58  | 1200  | 0.350801 | 1.90582  | -2.44169  | 0.00185 | 0.0317167 |
| NM_003829.3       | 8777              | MPDZ     | 7438  | 17.0625  | 29.0989  | -0.770134 | 0.00185 | 0.0317167 |
| NM_015668.3       | 26166             | RGS22    | 4184  | 16.2235  | 28.5281  | -0.814297 | 0.00185 | 0.0317167 |
| TCONS_00133407    | XLOC_010538       | -        | 2599  | 1.78318  | 4.104    | -1.20258  | 0.00185 | 0.0317167 |
| NM_006367.3       | 10487             | CAP1     | 2773  | 83.5729  | 44.2391  | 0.917714  | 0.00185 | 0.0317167 |
| NM_001198689.1    | 3953              | LEPR     | 5100  | 16.5626  | 64.7144  | -1.96616  | 0.00185 | 0.0317167 |
| NM_030782.3       | 81037             | CLPTM1L  | 2148  | 35.1958  | 20.7687  | 0.760991  | 0.00185 | 0.0317167 |
| NM_020747.2       | 57507             | ZNF608   | 5645  | 7.90934  | 13.5527  | -0.776951 | 0.00185 | 0.0317167 |
| NM_016010.2       | 51101             | FAM164A  | 3352  | 17.1619  | 28.8579  | -0.749754 | 0.00185 | 0.0317167 |
| NM_001080444.1    | 150084            | IGSF5    | 2066  | 0.186116 | 0.907261 | -2.28531  | 0.00185 | 0.0317167 |
| NM_002372.2       | 4124              | MAN2A1   | 5128  | 30.9774  | 18.5905  | 0.736651  | 0.00185 | 0.0317167 |
| NM_002350.2       | 4067              | LYN      | 3092  | 31.3584  | 16.6674  | 0.911827  | 0.0019  | 0.0323187 |
| NM_001423.2       | 2012              | EMP1     | 2804  | 33.5609  | 58.9101  | -0.811734 | 0.0019  | 0.0323187 |
| NM_080387.4       | 338339            | CLEC4D   | 1936  | 1.80565  | 0.536234 | 1.75159   | 0.0019  | 0.0323187 |
| NM_014143.3       | 29126             | CD274    | 3686  | 7.42843  | 3.89331  | 0.932059  | 0.0019  | 0.0323187 |
| NM_000027.3       | 175               | AGA      | 2103  | 17.7639  | 9.54395  | 0.896288  | 0.0019  | 0.0323187 |
| NM_001838.3       | 1236              | CCR7     | 2185  | 6.63526  | 3.03398  | 1.12894   | 0.0019  | 0.0323187 |
| NM_213599.2       | 203859            | ANO5     | 6661  | 0.43282  | 1.7271   | -1.99651  | 0.0019  | 0.0323187 |
| NM_003243.4       | 7049              | TGFBR3   | 6467  | 11.0479  | 20.7131  | -0.906769 | 0.0019  | 0.0323187 |
| NM_178140.2       | 23037             | PDZD2    | 11642 | 5.40804  | 9.05298  | -0.743288 | 0.0019  | 0.0323187 |
| NM_000616.4       | 920               | CD4      | 3116  | 14.5046  | 7.53192  | 0.945418  | 0.0019  | 0.0323187 |
| NM_002649.2       | 5294              | PIK3CG   | 5379  | 12.7896  | 7.36006  | 0.797184  | 0.00195 | 0.0329693 |
| NM_152376.3       | 127733            | UBXN10   | 2972  | 28.6263  | 47.6268  | -0.734432 | 0.00195 | 0.0329693 |
| NM_014867.2       | 9920              | KBTBD11  | 6717  | 1.37335  | 2.69693  | -0.973621 | 0.00195 | 0.0329693 |
| NM_025107.2       | 80177             | MYCT1    | 3045  | 8.33713  | 14.5865  | -0.80701  | 0.00195 | 0.0329693 |
| TCONS_00000463    | XLOC_000192       | -        | 4312  | 1.01879  | 2.29882  | -1.17404  | 0.00195 | 0.0329693 |
| NM_004911.4       | 9601              | PDIA4    | 2952  | 75.2829  | 45.242   | 0.734659  | 0.00195 | 0.0329693 |
| NM_152869.2       | 9104              | RGN      | 2235  | 0.532413 | 4.33111  | -3.02412  | 0.00195 | 0.0329693 |
| NM_006648.3       | 65268             | WNK2     | 6834  | 0.648537 | 1.46654  | -1.17715  | 0.00195 | 0.0329693 |
| NM_133457.2       | 136227            | EMID2    | 3005  | 2.30186  | 4.94397  | -1.10287  | 0.00195 | 0.0329693 |
| NM_006033.2       | 9388              | LIPG     | 4141  | 0.876609 | 0.292751 | 1.58226   | 0.002   | 0.0335868 |
| NM_000044.2       | 367               | AR       | 4314  | 1.22889  | 3.04562  | -1.30938  | 0.002   | 0.0335868 |
| NM_182500.2       | 130813            | C2orf50  | 1056  | 2.72954  | 6.83274  | -1.3238   | 0.002   | 0.0335868 |
| NM_006082.2       | 10376             | TUBA1B   | 1753  | 140.646  | 84.1687  | 0.740715  | 0.002   | 0.0335868 |
| NM_016274.4       | 51177             | PLEKHO1  | 1615  | 25.1083  | 13.7301  | 0.870825  | 0.002   | 0.0335868 |
| NM_002976.3       | 6332              | SCN7A    | 7186  | 1.61744  | 3.11981  | -0.947749 | 0.002   | 0.0335868 |
| TCONS_00176190    | XLOC_013455       | -        | 1936  | 0.878254 | 2.53544  | -1.52953  | 0.002   | 0.0335868 |
| NM_130847.2       | 154810            | AMOTL1   | 8999  | 11.9087  | 20.0838  | -0.754015 | 0.002   | 0.0335868 |
| NM_000057.2       | 641               | BLM      | 4528  | 3.50817  | 1.66242  | 1.07744   | 0.00205 | 0.0341961 |
| NM_198474.3       | 283298            | OLFML1   | 2905  | 7.86364  | 13.9819  | -0.830293 | 0.00205 | 0.0341961 |
| NM_014759.3       | 9796              | PHYHIP   | 3215  | 0.412173 | 1.22527  | -1.57177  | 0.00205 | 0.0341961 |
| NM_002648.3       | 5292              | PIM1     | 2709  | 11.6142  | 6.26396  | 0.890749  | 0.00205 | 0.0341961 |
| ENST00000538665.1 | ENSG00000255733.1 | IFNG-AS1 | 1791  | 13.2136  | 6.46886  | 1.03044   | 0.00205 | 0.0341961 |
| NM_003155.2       | 6781              | STC1     | 3877  | 10.8552  | 6.10944  | 0.829278  | 0.00205 | 0.0341961 |
| NM_001031716.2    | 64859             | OBFC2A   | 3849  | 37.2567  | 22.2308  | 0.744942  | 0.00205 | 0.0341961 |
| NM_001136482.1    | 255809            | C19orf38 | 1089  | 3.26357  | 0.9874   | 1.72474   | 0.00205 | 0.0341961 |
| NM_001081438.1    | 11006             | LILRB4   | 2084  | 4.17331  | 0.940981 | 2.14896   | 0.00205 | 0.0341961 |
| NM_014420.2       | 27121             | DKK4     | 818   | 2.40412  | 0.491183 | 2.29118   | 0.00205 | 0.0341961 |
| NM_000297.3       | 5311              | PKD2     | 5079  | 15.8803  | 26.4233  | -0.734569 | 0.0021  | 0.0348574 |

|                   |                   |              |       |          |          |           |         |           |
|-------------------|-------------------|--------------|-------|----------|----------|-----------|---------|-----------|
| NM_004255.3       | 9377              | COX5A        | 770   | 44.4846  | 23.8837  | 0.897277  | 0.0021  | 0.0348574 |
| NM_199280.2       | 165186            | FAM179A      | 3548  | 5.7623   | 10.5229  | -0.868811 | 0.0021  | 0.0348574 |
| NM_000918.3       | 5034              | P4HB         | 2578  | 105.702  | 63.2556  | 0.740736  | 0.0021  | 0.0348574 |
| NM_014488.3       | 27314             | RAB30        | 1602  | 26.1247  | 14.6455  | 0.834956  | 0.0021  | 0.0348574 |
| NM_006142.3       | 2810              | SFN          | 1315  | 13.6089  | 6.7159   | 1.01889   | 0.00215 | 0.0355296 |
| NM_003257.3       | 7082              | TJP1         | 7165  | 12.1953  | 33.8133  | -1.47127  | 0.00215 | 0.0355296 |
| NM_173695.2       | 286464            | CXorf59      | 1956  | 13.6792  | 24.0057  | -0.811391 | 0.00215 | 0.0355296 |
| NM_005222.3       | 1750              | DLX6         | 1875  | 0.579731 | 1.73597  | -1.58229  | 0.00215 | 0.0355296 |
| XM_003118966.1    | 100506711         | LOC100506711 | 1898  | 11.1922  | 20.2473  | -0.855238 | 0.0022  | 0.0361165 |
| NM_019885.2       | 56603             | CYP26B1      | 4528  | 5.14771  | 2.61029  | 0.97972   | 0.0022  | 0.0361165 |
| TCONS_00241592    | XLOC_020747       | -            | 3066  | 1.30575  | 0.236254 | 2.46647   | 0.0022  | 0.0361165 |
| NM_018013.3       | 55084             | SOBP         | 6232  | 2.31791  | 4.33429  | -0.90297  | 0.0022  | 0.0361165 |
| NM_001098526.1    | 120425            | AMICA1       | 1957  | 28.6569  | 14.4784  | 0.984977  | 0.0022  | 0.0361165 |
| NM_005408.2       | 6357              | CCL13        | 851   | 2.65448  | 0.321955 | 3.0435    | 0.0022  | 0.0361165 |
| NM_001172129.1    | 3055              | HCK          | 2155  | 9.49841  | 4.50093  | 1.07746   | 0.0022  | 0.0361165 |
| NM_013281.3       | 23767             | FLRT3        | 3830  | 8.16528  | 17.3855  | -1.09031  | 0.0022  | 0.0361165 |
| NM_000088.3       | 1277              | COL1A1       | 5927  | 40.5953  | 144.43   | -1.83099  | 0.0022  | 0.0361165 |
| NM_000517.4       | 3040              | HBA2         | 605   | 3.43494  | 11.0146  | -1.68106  | 0.0022  | 0.0361165 |
| NM_173543.2       | 199221            | DZIP1L       | 3498  | 5.60001  | 10.6107  | -0.922023 | 0.00225 | 0.0367046 |
| NM_017982.3       | 55061             | SUSD4        | 3027  | 2.82254  | 6.00956  | -1.09027  | 0.00225 | 0.0367046 |
| NM_001198557.1    | 4001              | LMNB1        | 2250  | 13.3513  | 6.30134  | 1.08324   | 0.00225 | 0.0367046 |
| NM_006492.2       | 257               | ALX3         | 1478  | 1.75103  | 4.3006   | -1.29634  | 0.00225 | 0.0367046 |
| NM_003061.2       | 6585              | SLIT1        | 7931  | 0.406315 | 0.956269 | -1.23482  | 0.00225 | 0.0367046 |
| NM_001982.3       | 2065              | ERBB3        | 5757  | 19.2291  | 11.6105  | 0.727865  | 0.00225 | 0.0367046 |
| NM_001097589.1    | 6707              | SPRR3        | 902   | 3.49682  | 0.327627 | 3.41592   | 0.00225 | 0.0367046 |
| NM_004355.2       | 972               | CD74         | 1311  | 1347.82  | 519.206  | 1.37624   | 0.00225 | 0.0367046 |
| NM_001111097.1    | 4067              | LYN          | 3029  | 19.2899  | 6.89525  | 1.48417   | 0.0023  | 0.0373663 |
| NM_017481.2       | 50613             | UBQLN3       | 2345  | 0.394743 | 1.23448  | -1.64492  | 0.0023  | 0.0373663 |
| NM_001128423.1    | 255027            | MPV17L       | 2309  | 12.9416  | 5.37442  | 1.26784   | 0.0023  | 0.0373663 |
| NM_018982.4       | 54432             | YIPF1        | 1852  | 19.7609  | 11.1554  | 0.824908  | 0.0023  | 0.0373663 |
| NM_003537.3       | 8358              | HIST1H3B     | 472   | 38.4051  | 15.5455  | 1.3048    | 0.0023  | 0.0373663 |
| NM_001010000.2    | 79822             | ARHGAP28     | 5534  | 3.93763  | 6.97306  | -0.824464 | 0.0023  | 0.0373663 |
| NM_001165038.1    | 2675              | GFRA2        | 3015  | 1.05812  | 3.8669   | -1.86968  | 0.0023  | 0.0373663 |
| NM_006287.4       | 7035              | TFPI         | 3916  | 13.3169  | 23.1363  | -0.796906 | 0.00235 | 0.0379132 |
| NM_014395.2       | 27071             | DAPP1        | 2938  | 35.8757  | 21.4632  | 0.741141  | 0.00235 | 0.0379132 |
| TCONS_00299625    | XLOC_024811       | -            | 4367  | 0.915888 | 2.13658  | -1.22206  | 0.00235 | 0.0379132 |
| NM_001109809.2    | 346171            | ZFP57        | 1870  | 1.60841  | 0.512756 | 1.64929   | 0.00235 | 0.0379132 |
| NM_004170.5       | 6505              | SLC1A1       | 3739  | 5.42526  | 9.68407  | -0.835921 | 0.00235 | 0.0379132 |
| NM_013340.2       | 29930             | PCDHB1       | 2534  | 0.775551 | 2.04343  | -1.3977   | 0.00235 | 0.0379132 |
| NM_003096.2       | 6637              | SNRPG        | 575   | 83.0615  | 45.9426  | 0.854347  | 0.00235 | 0.0379132 |
| NM_006432.3       | 10577             | NPC2         | 897   | 200.489  | 122.732  | 0.708014  | 0.00235 | 0.0379132 |
| NM_182701.1       | 257202            | GPX6         | 1712  | 0.21105  | 1.3706   | -2.69915  | 0.00235 | 0.0379132 |
| ENST00000606242.1 | ENSG00000267530.2 | AC006273.5   | 710   | 2.66517  | 9.55615  | -1.8422   | 0.0024  | 0.03848   |
| NM_000619.2       | 3458              | IFNG         | 1210  | 5.42209  | 1.65962  | 1.70799   | 0.0024  | 0.03848   |
| NM_013401.2       | 5866              | RAB3IL1      | 2284  | 2.03433  | 4.49611  | -1.14412  | 0.0024  | 0.03848   |
| NM_173651.2       | 401024            | FSIP2        | 21054 | 2.59354  | 4.49562  | -0.793599 | 0.0024  | 0.03848   |
| TCONS_00289951    | XLOC_024322       | -            | 3108  | 1.22366  | 0.451591 | 1.43811   | 0.0024  | 0.03848   |
| NM_134424.2       | 5893              | RAD52        | 2673  | 3.59547  | 6.82609  | -0.924882 | 0.0024  | 0.03848   |
| NM_000239.2       | 4069              | LYZ          | 1516  | 1996.13  | 199.578  | 3.32218   | 0.0024  | 0.03848   |
| XM_003403451.1    | 100508736         | LOC100508736 | 1567  | 10.1482  | 19.0839  | -0.91113  | 0.0024  | 0.03848   |
| NM_178554.4       | 339855            | KY           | 5704  | 0.341729 | 0.912367 | -1.41676  | 0.0024  | 0.03848   |
| NM_003524.2       | 8345              | HIST1H2BH    | 425   | 56.4484  | 26.7689  | 1.07637   | 0.0024  | 0.03848   |
| NM_153366.3       | 79987             | SVEP1        | 12344 | 16.9042  | 30.1266  | -0.833659 | 0.0024  | 0.03848   |
| NM_000544.3       | 6891              | TAP2         | 5679  | 16.5558  | 9.32042  | 0.82887   | 0.0024  | 0.03848   |

|                |             |           |       |          |          |           |         |           |
|----------------|-------------|-----------|-------|----------|----------|-----------|---------|-----------|
| NM_198181.2    | 440295      | GOLGA6L9  | 4375  | 2.6674   | 5.05678  | -0.922783 | 0.00245 | 0.039114  |
| NM_000803.4    | 2350        | FOLR2     | 1131  | 29.8546  | 14.7432  | 1.01791   | 0.00245 | 0.039114  |
| NM_053056.2    | 595         | CCND1     | 4289  | 41.7768  | 68.8619  | -0.721003 | 0.00245 | 0.039114  |
| TCONS_00268990 | XLOC_023119 | -         | 3294  | 2.03454  | 0.474153 | 2.10128   | 0.00245 | 0.039114  |
| NM_001004067.3 | 408050      | NOMO3     | 4316  | 2.37045  | 0.990041 | 1.2596    | 0.0025  | 0.0397144 |
| NM_000673.4    | 131         | ADH7      | 2289  | 21.6311  | 37.4903  | -0.793411 | 0.0025  | 0.0397144 |
| NM_004274.4    | 9472        | AKAP6     | 10387 | 7.24343  | 11.8848  | -0.714375 | 0.0025  | 0.0397144 |
| NM_015069.2    | 23090       | ZNF423    | 4818  | 1.91296  | 3.76383  | -0.976397 | 0.0025  | 0.0397144 |
| NM_001781.2    | 969         | CD69      | 1676  | 25.6891  | 14.1771  | 0.857589  | 0.0025  | 0.0397144 |
| NM_001093.3    | 32          | ACACB     | 9250  | 4.4828   | 7.509    | -0.744221 | 0.0025  | 0.0397144 |
| NM_018102.3    | 55713       | ZNF334    | 2455  | 3.90401  | 8.65895  | -1.14923  | 0.0025  | 0.0397144 |
| NM_001173463.1 | 55605       | KIF21A    | 6530  | 29.0202  | 50.1285  | -0.788572 | 0.0025  | 0.0397144 |
| NM_000929.2    | 5322        | PLA2G5    | 1894  | 0.413318 | 1.32441  | -1.68003  | 0.0025  | 0.0397144 |
| NM_199289.1    | 341676      | NEK5      | 2912  | 13.2112  | 22.3474  | -0.758343 | 0.0025  | 0.0397144 |
| NM_021074.4    | 4729        | NDUFV2    | 930   | 109.097  | 65.9683  | 0.725769  | 0.0025  | 0.0397144 |
| NM_005412.5    | 6472        | SHMT2     | 2295  | 12.9131  | 6.64642  | 0.958181  | 0.00255 | 0.0402995 |
| NM_005912.2    | 4160        | MC4R      | 1438  | 2.38977  | 0.763864 | 1.64549   | 0.00255 | 0.0402995 |
| NM_001099221.1 | 497189      | TIFAB     | 1273  | 2.10709  | 0.659298 | 1.67625   | 0.00255 | 0.0402995 |
| NM_005615.4    | 6039        | RNASE6    | 1061  | 34.2103  | 18.8929  | 0.856587  | 0.00255 | 0.0402995 |
| NM_005688.2    | 10057       | ABCC5     | 5845  | 4.82494  | 9.1921   | -0.929885 | 0.00255 | 0.0402995 |
| 3500           | 3500        | -         | 992   | 8237.46  | 1088.54  | 2.91981   | 0.00255 | 0.0402995 |
| NM_015692.2    | 27151       | CPAMD8    | 5988  | 0.487301 | 1.19218  | -1.29072  | 0.00255 | 0.0402995 |
| NM_173505.2    | 147463      | ANKRD29   | 2274  | 3.46836  | 7.15142  | -1.04397  | 0.00255 | 0.0402995 |
| NM_020203.3    | 56955       | MEPE      | 2007  | 0.568371 | 1.66713  | -1.55246  | 0.0026  | 0.040888  |
| XM_001715897.2 | 408186      | OVOS      | 4119  | 1.20382  | 0.392361 | 1.61737   | 0.0026  | 0.040888  |
| NM_001039396.1 | 219972      | MPEG1     | 4512  | 48.9505  | 25.394   | 0.946836  | 0.0026  | 0.040888  |
| NM_005443.4    | 9061        | PAPSS1    | 2542  | 76.18    | 45.9811  | 0.72837   | 0.00265 | 0.0415288 |
| NM_152663.3    | 55103       | RALGPS2   | 5834  | 23.9994  | 12.3326  | 0.960517  | 0.00265 | 0.0415288 |
| NM_001142699.1 | 1740        | DLG2      | 8046  | 0.822409 | 2.50481  | -1.60678  | 0.0027  | 0.0421065 |
| NM_032888.2    | 85301       | COL27A1   | 5583  | 1.2692   | 2.58742  | -1.02759  | 0.0027  | 0.0421065 |
| NM_024761.4    | 79817       | MOBK2B    | 6525  | 2.29394  | 4.32309  | -0.914236 | 0.0027  | 0.0421065 |
| NM_004433.4    | 1999        | ELF3      | 3134  | 60.3889  | 36.3806  | 0.731113  | 0.0027  | 0.0421065 |
| NM_005290.1    | 2838        | GPR15     | 1083  | 2.71639  | 0.753787 | 1.84946   | 0.0027  | 0.0421065 |
| TCONS_00046009 | XLOC_004001 | -         | 817   | 0.418225 | 2.37186  | -2.50367  | 0.0027  | 0.0421065 |
| NM_016529.4    | 51761       | ATP8A2    | 5006  | 1.86093  | 0.805169 | 1.20866   | 0.0027  | 0.0421065 |
| NM_014618.2    | 1620        | DBC1      | 3196  | 3.7226   | 1.64308  | 1.17991   | 0.0027  | 0.0421065 |
| NM_020762.2    | 57522       | SRGAP1    | 8475  | 2.59334  | 4.45138  | -0.779443 | 0.0027  | 0.0421065 |
| NM_032131.4    | 84071       | ARMC2     | 3413  | 11.2294  | 18.9244  | -0.75297  | 0.00275 | 0.0426687 |
| NM_178011.3    | 347731      | LRRTM3    | 5609  | 0.305832 | 1.03505  | -1.75888  | 0.00275 | 0.0426687 |
| NM_000417.2    | 3559        | IL2RA     | 3216  | 3.33699  | 1.52618  | 1.12862   | 0.00275 | 0.0426687 |
| NM_031898.2    | 64518       | TEKT3     | 1784  | 1.5255   | 3.70959  | -1.28197  | 0.00275 | 0.0426687 |
| NM_001145664.1 | 731220      | RFX8      | 1729  | 0.187325 | 0.929495 | -2.3109   | 0.00275 | 0.0426687 |
| NM_001127391.1 | 130540      | ALS2CR12  | 1944  | 8.60666  | 16.0725  | -0.901067 | 0.00275 | 0.0426687 |
| NM_017839.4    | 54947       | LPCAT2    | 5388  | 10.5208  | 6.29546  | 0.740861  | 0.00275 | 0.0426687 |
| NM_003446.3    | 7712        | ZNF157    | 1695  | 2.12303  | 4.81562  | -1.1816   | 0.00275 | 0.0426687 |
| NM_003518.3    | 8339        | HIST1H2BG | 445   | 64.081   | 31.6684  | 1.01685   | 0.00275 | 0.0426687 |
| NM_024943.1    | 80008       | TMEM156   | 1878  | 7.29762  | 3.41753  | 1.09447   | 0.00275 | 0.0426687 |
| NM_006931.2    | 6515        | SLC2A3    | 3938  | 11.5063  | 6.6203   | 0.797461  | 0.00275 | 0.0426687 |
| NM_145172.3    | 126820      | WDR63     | 3007  | 18.9917  | 31.7857  | -0.743008 | 0.0028  | 0.0432452 |
| NM_006135.2    | 829         | CAPZA1    | 2740  | 111.067  | 67.533   | 0.71776   | 0.0028  | 0.0432452 |
| NM_012242.2    | 22943       | DKK1      | 1805  | 1.56218  | 0.473831 | 1.72112   | 0.0028  | 0.0432452 |
| NM_006714.3    | 10924       | SMPDL3A   | 2195  | 12.9641  | 7.11525  | 0.865535  | 0.0028  | 0.0432452 |
| NM_004961.3    | 2564        | GABRE     | 3152  | 3.25493  | 6.26439  | -0.944549 | 0.0028  | 0.0432452 |
| NM_175862.4    | 942         | CD86      | 2727  | 12.8441  | 6.90471  | 0.895448  | 0.0028  | 0.0432452 |

|                |             |              |       |          |          |           |         |           |
|----------------|-------------|--------------|-------|----------|----------|-----------|---------|-----------|
| TCONS_00103444 | XLOC_008124 | -            | 1958  | 40.7763  | 23.9274  | 0.769064  | 0.0028  | 0.0432452 |
| NM_021058.3    | 8970        | HIST1H2BJ    | 481   | 54.2158  | 26.7473  | 1.01932   | 0.0028  | 0.0432452 |
| NM_003742.2    | 8647        | ABCB11       | 4775  | 3.21867  | 1.57584  | 1.03035   | 0.0028  | 0.0432452 |
| NM_005779.2    | 10184       | LHFPL2       | 5045  | 17.6872  | 28.5613  | -0.691352 | 0.00285 | 0.0437663 |
| NM_006516.2    | 6513        | SLC2A1       | 3670  | 14.7054  | 8.73311  | 0.751778  | 0.00285 | 0.0437663 |
| NM_001628.2    | 231         | AKR1B1       | 1398  | 18.0487  | 31.7768  | -0.816074 | 0.00285 | 0.0437663 |
| NM_001029864.1 | 85449       | KIAA1755     | 6412  | 0.801336 | 1.75274  | -1.12913  | 0.00285 | 0.0437663 |
| NM_000201.2    | 3383        | ICAM1        | 3246  | 11.6094  | 6.61486  | 0.811511  | 0.00285 | 0.0437663 |
| NM_000434.3    | 4758        | NEU1         | 2071  | 19.0537  | 11.0421  | 0.787055  | 0.00285 | 0.0437663 |
| NM_001025266.1 | 285382      | C3orf70      | 5901  | 4.33434  | 2.2555   | 0.942364  | 0.0029  | 0.0443924 |
| NM_194302.2    | 255101      | CCDC108      | 5945  | 2.83059  | 5.20581  | -0.879021 | 0.0029  | 0.0443924 |
| NM_002652.2    | 5304        | PIP          | 576   | 16.7682  | 4.27924  | 1.9703    | 0.0029  | 0.0443924 |
| NM_017594.3    | 54769       | DIRAS2       | 4107  | 0.322685 | 0.902626 | -1.484    | 0.0029  | 0.0443924 |
| NM_013378.2    | 29802       | VPREB3       | 585   | 4.86699  | 1.30176  | 1.90257   | 0.00295 | 0.0449329 |
| NM_145912.5    | 150372      | NFAM1        | 5605  | 2.30641  | 1.12952  | 1.02994   | 0.00295 | 0.0449329 |
| NM_015000.3    | 23012       | STK38L       | 5098  | 28.6834  | 17.5419  | 0.709413  | 0.00295 | 0.0449329 |
| NM_018323.3    | 55300       | PI4K2B       | 3601  | 22.2284  | 13.3654  | 0.733905  | 0.00295 | 0.0449329 |
| TCONS_00278332 | XLOC_023384 | -            | 1144  | 8.13869  | 2.72486  | 1.57861   | 0.00295 | 0.0449329 |
| NM_145018.3    | 220042      | C11orf82     | 3565  | 2.00233  | 0.856252 | 1.22557   | 0.00295 | 0.0449329 |
| NM_015595.3    | 26084       | ARHGEF26     | 5181  | 3.82647  | 6.77951  | -0.825165 | 0.00295 | 0.0449329 |
| NM_032160.2    | 92126       | DSEL         | 9281  | 3.8337   | 6.57699  | -0.77869  | 0.00295 | 0.0449329 |
| NM_001677.3    | 481         | ATP1B1       | 2200  | 163.207  | 92.0368  | 0.826418  | 0.003   | 0.0454886 |
| NM_178504.4    | 201625      | DNAH12       | 9542  | 25.6993  | 45.6945  | -0.830292 | 0.003   | 0.0454886 |
| NM_001557.3    | 3579        | CXCR2        | 2870  | 3.47956  | 1.20187  | 1.53362   | 0.003   | 0.0454886 |
| NM_001085447.1 | 129881      | C2orf77      | 2169  | 12.3097  | 21.6062  | -0.811648 | 0.003   | 0.0454886 |
| NM_001136219.1 | 2212        | FCGR2A       | 2429  | 17.1264  | 8.22393  | 1.05832   | 0.003   | 0.0454886 |
| NM_178537.4    | 338707      | B4GALNT4     | 3454  | 0.362156 | 1.03149  | -1.51004  | 0.003   | 0.0454886 |
| NM_001136018.2 | 2052        | EPHX1        | 1664  | 35.6195  | 70.088   | -0.976501 | 0.003   | 0.0454886 |
| NM_019856.1    | 8736        | MYOM1        | 5559  | 1.64154  | 3.51762  | -1.09955  | 0.003   | 0.0454886 |
| NM_001882.3    | 1393        | CRHBP        | 1838  | 0.779504 | 2.22215  | -1.51133  | 0.003   | 0.0454886 |
| NM_001012455.1 | 222696      | ZSCAN23      | 3161  | 1.60192  | 3.46756  | -1.11412  | 0.00305 | 0.04606   |
| NM_024989.3    | 80055       | PGAP1        | 11113 | 7.09943  | 11.5644  | -0.703916 | 0.00305 | 0.04606   |
| NM_019844.2    | 28234       | SLCO1B3      | 2712  | 6.05366  | 2.54797  | 1.24846   | 0.00305 | 0.04606   |
| NM_001202553.1 | 8190        | MIA          | 510   | 17.3703  | 2.19027  | 2.98744   | 0.00305 | 0.04606   |
| TCONS_00106634 | XLOC_008067 | -            | 5143  | 2.18073  | 5.32095  | -1.28687  | 0.00305 | 0.04606   |
| XM_003118626.2 | 100506209   | LOC100506209 | 3519  | 2.3406   | 4.65572  | -0.992128 | 0.00305 | 0.04606   |
| TCONS_00246975 | XLOC_020777 | -            | 1222  | 1.4077   | 0.238184 | 2.5632    | 0.0031  | 0.0465955 |
| NM_001142807.1 | 55289       | ACOXL        | 2373  | 0.829605 | 0.19711  | 2.07342   | 0.0031  | 0.0465955 |
| NM_153267.4    | 256691      | MAMDC2       | 3618  | 5.48322  | 10.0174  | -0.869417 | 0.0031  | 0.0465955 |
| NM_016644.1    | 51334       | PRR16        | 1764  | 1.35465  | 0.422426 | 1.68115   | 0.0031  | 0.0465955 |
| NM_024783.3    | 79841       | AGBL2        | 3593  | 9.67783  | 16.3753  | -0.758768 | 0.0031  | 0.0465955 |
| NM_004878.4    | 9536        | PTGES        | 1787  | 5.85614  | 2.68954  | 1.12259   | 0.0031  | 0.0465955 |
| TCONS_00153526 | XLOC_013969 | -            | 3500  | 0.999016 | 2.24264  | -1.16662  | 0.0031  | 0.0465955 |
| NM_015570.2    | 26053       | AUTS2        | 6418  | 6.97612  | 12.1044  | -0.795032 | 0.0031  | 0.0465955 |
| NM_003877.3    | 8835        | SOCS2        | 2210  | 12.0339  | 20.717   | -0.78371  | 0.00315 | 0.0471261 |
| NM_058164.2    | 93145       | OLFM2        | 1861  | 2.53232  | 5.69758  | -1.16989  | 0.00315 | 0.0471261 |
| NM_032385.3    | 10826       | C5orf4       | 2997  | 11.8357  | 20.1378  | -0.766755 | 0.00315 | 0.0471261 |
| NM_148672.2    | 56477       | CCL28        | 816   | 35.2447  | 18.3912  | 0.938388  | 0.00315 | 0.0471261 |
| TCONS_00268841 | XLOC_022907 | -            | 1765  | 0.570237 | 1.6536   | -1.53598  | 0.00315 | 0.0471261 |
| NM_001956.3    | 1907        | EDN2         | 1243  | 1.50871  | 0.30132  | 2.32395   | 0.00315 | 0.0471261 |
| NM_004180.2    | 10010       | TANK         | 2089  | 29.274   | 10.3237  | 1.50365   | 0.0032  | 0.0476939 |
| NM_001866.2    | 1349        | COX7B        | 456   | 289.188  | 176.668  | 0.710963  | 0.0032  | 0.0476939 |
| NM_030913.4    | 10500       | SEMA6C       | 3928  | 0.498911 | 1.28101  | -1.36043  | 0.0032  | 0.0476939 |
| TCONS_00234687 | XLOC_020386 | -            | 870   | 2.02238  | 5.5224   | -1.44924  | 0.0032  | 0.0476939 |



|                |             |              |      |          |         |           |         |           |
|----------------|-------------|--------------|------|----------|---------|-----------|---------|-----------|
| TCONS_00012726 | XLOC_001573 | -            | 3939 | 0.407029 | 2.16769 | -2.41295  | 0.0032  | 0.0476939 |
| NM_000681.3    | 150         | ADRA2A       | 3876 | 14.3173  | 8.47532 | 0.756424  | 0.00325 | 0.0483534 |
| TCONS_00000222 | XLOC_000045 | -            | 2791 | 3.28476  | 7.08412 | -1.1088   | 0.00325 | 0.0483534 |
| NM_178568.2    | 146760      | RTN4RL1      | 3164 | 0.922589 | 2.17195 | -1.23523  | 0.00325 | 0.0483534 |
| NM_004335.2    | 684         | BST2         | 939  | 115.619  | 70.7397 | 0.708783  | 0.0033  | 0.0489028 |
| NM_005725.4    | 10100       | TSPAN2       | 3213 | 7.44976  | 4.01568 | 0.891549  | 0.0033  | 0.0489028 |
| NM_206963.1    | 5918        | RARRES1      | 1526 | 300.035  | 142.639 | 1.07276   | 0.0033  | 0.0489028 |
| NM_007293.2    | 720         | C4A          | 5426 | 2.63952  | 1.28264 | 1.04116   | 0.0033  | 0.0489028 |
| NM_006770.3    | 8685        | MARCO        | 1835 | 7.27374  | 2.55838 | 1.50747   | 0.0033  | 0.0489028 |
| NM_003816.2    | 8754        | ADAM9        | 4099 | 67.2931  | 41.2413 | 0.70637   | 0.0033  | 0.0489028 |
| NM_005516.5    | 3133        | HLA-E        | 2662 | 471.508  | 238.229 | 0.98493   | 0.00335 | 0.0494369 |
| NM_021243.2    | 58527       | C6orf115     | 845  | 34.1836  | 18.4048 | 0.893219  | 0.00335 | 0.0494369 |
| NM_006763.2    | 7832        | BTG2         | 2712 | 76.3341  | 46.769  | 0.706773  | 0.00335 | 0.0494369 |
| XM_003403544.1 | 100652762   | LOC100652762 | 1905 | 3.09247  | 6.39555 | -1.04831  | 0.00335 | 0.0494369 |
| NM_002507.3    | 4804        | NGFR         | 3420 | 3.45483  | 6.53739 | -0.920102 | 0.00335 | 0.0494369 |

**Table S5. Differentially expressed lncRNA and mRNA transcripts for ECRSwNP vs non-ECRSwNP.**

| Transcript ID  | Gene ID     | Gene name    | Length | ECRSwNP FPKM | non-ECRSwNP FPKM | log <sub>2</sub> (foldchange) | P value  | Q value    |
|----------------|-------------|--------------|--------|--------------|------------------|-------------------------------|----------|------------|
| NM_025074.6    | 80144       | FRAS1        | 15624  | 4.40124      | 1.70678          | 1.36663                       | 5.00E-05 | 0.00170056 |
| NM_003670.2    | 8553        | BHLHE40      | 3035   | 98.1131      | 31.6047          | 1.63431                       | 5.00E-05 | 0.00170056 |
| NM_001454.3    | 2302        | FOXJ1        | 2641   | 19.355       | 47.8944          | -1.30715                      | 5.00E-05 | 0.00170056 |
| NM_031476.3    | 83716       | CRISPLD2     | 4589   | 32.2142      | 15.7879          | 1.02888                       | 5.00E-05 | 0.00170056 |
| NM_000789.3    | 1636        | ACE          | 4969   | 6.38162      | 2.61739          | 1.28579                       | 5.00E-05 | 0.00170056 |
| NM_016206.2    | 389136      | VGLL3        | 10396  | 20.62        | 8.70453          | 1.2442                        | 5.00E-05 | 0.00170056 |
| NM_000527.4    | 3949        | LDLR         | 5284   | 15.7748      | 4.48996          | 1.81284                       | 5.00E-05 | 0.00170056 |
| NM_130435.3    | 5791        | PTPRE        | 5039   | 19.0631      | 8.79356          | 1.11626                       | 5.00E-05 | 0.00170056 |
| NM_018897.2    | 56171       | DNAH7        | 12394  | 9.65151      | 24.3824          | -1.33701                      | 5.00E-05 | 0.00170056 |
| NM_003407.2    | 7538        | ZFP36        | 1745   | 45.3106      | 6.55648          | 2.78886                       | 5.00E-05 | 0.00170056 |
| NM_018043.5    | 55107       | ANO1         | 4807   | 11.5602      | 5.25339          | 1.13784                       | 5.00E-05 | 0.00170056 |
| NM_178171.4    | 284110      | GSDMA        | 2164   | 2.54552      | 0.387037         | 2.71741                       | 5.00E-05 | 0.00170056 |
| NM_033124.4    | 85478       | CCDC65       | 1815   | 11.1135      | 28.5293          | -1.36014                      | 5.00E-05 | 0.00170056 |
| NM_001010855.2 | 146850      | PIK3R6       | 3040   | 4.40492      | 0.879517         | 2.32433                       | 5.00E-05 | 0.00170056 |
| NM_033364.3    | 89876       | C3orf15      | 4433   | 4.77248      | 15.9909          | -1.74444                      | 5.00E-05 | 0.00170056 |
| NM_001422.2    | 2001        | ELF5         | 2302   | 22.3835      | 8.69459          | 1.36425                       | 5.00E-05 | 0.00170056 |
| NM_017596.2    | 23046       | KIF21B       | 9895   | 5.5784       | 2.21288          | 1.33393                       | 5.00E-05 | 0.00170056 |
| NM_145172.3    | 126820      | WDR63        | 3007   | 6.83313      | 18.9917          | -1.47475                      | 5.00E-05 | 0.00170056 |
| NM_001945.2    | 1839        | HBEGF        | 2358   | 20.1238      | 2.34266          | 3.10269                       | 5.00E-05 | 0.00170056 |
| NM_004982.2    | 3764        | KCNJ8        | 2381   | 14.0334      | 4.97994          | 1.49466                       | 5.00E-05 | 0.00170056 |
| NM_030919.2    | 81610       | FAM83D       | 2429   | 7.68453      | 2.951            | 1.38076                       | 5.00E-05 | 0.00170056 |
| NM_001042625.1 | 133690      | CAPSL        | 972    | 25.9003      | 64.6824          | -1.3204                       | 5.00E-05 | 0.00170056 |
| NM_001073.1    | 10720       | UGT2B11      | 1722   | 5.06682      | 0.416719         | 3.60394                       | 5.00E-05 | 0.00170056 |
| NM_001063.3    | 7018        | TF           | 2791   | 1.42997      | 44.1466          | -4.94824                      | 5.00E-05 | 0.00170056 |
| TCONS_00012088 | XLOC_000773 | -            | 793    | 78.1617      | 268.729          | -1.78162                      | 5.00E-05 | 0.00170056 |
| NM_145263.2    | 132671      | SPATA18      | 4300   | 14.9987      | 33.033           | -1.13907                      | 5.00E-05 | 0.00170056 |
| NM_002467.4    | 4609        | MYC          | 2366   | 27.3251      | 8.93989          | 1.6119                        | 5.00E-05 | 0.00170056 |
| NM_006418.4    | 10562       | OLFM4        | 2919   | 0.254717     | 1.81549          | -2.8334                       | 5.00E-05 | 0.00170056 |
| NM_001080424.1 | 23135       | KDM6B        | 6704   | 3.96764      | 1.35306          | 1.55206                       | 5.00E-05 | 0.00170056 |
| NM_153235.3    | 167838      | TXLNB        | 4685   | 2.56226      | 7.29209          | -1.50892                      | 5.00E-05 | 0.00170056 |
| NM_002122.3    | 3117        | HLA-DQA1     | 1542   | 94.8367      | 28.9265          | 1.71305                       | 5.00E-05 | 0.00170056 |
| NM_004770.2    | 9312        | KCNB2        | 3582   | 0.252283     | 2.1343           | -3.08065                      | 5.00E-05 | 0.00170056 |
| NM_033423.3    | 2999        | GZMH         | 902    | 3.91429      | 18.3289          | -2.2273                       | 5.00E-05 | 0.00170056 |
| NM_018076.2    | 55130       | ARMC4        | 3572   | 9.8742       | 29.713           | -1.58936                      | 5.00E-05 | 0.00170056 |
| NM_004425.3    | 1893        | ECM1         | 2144   | 11.4724      | 4.21046          | 1.44612                       | 5.00E-05 | 0.00170056 |
| NM_005304.3    | 2865        | FFAR3        | 1674   | 8.77307      | 0.426888         | 4.36115                       | 5.00E-05 | 0.00170056 |
| NM_153236.3    | 168537      | GIMAP7       | 1229   | 27.8463      | 56.8578          | -1.02987                      | 5.00E-05 | 0.00170056 |
| NM_005384.2    | 4783        | NFIL3        | 2085   | 59.6873      | 13.4964          | 2.14485                       | 5.00E-05 | 0.00170056 |
| XM_003118966.1 | 100506711   | LOC100506711 | 1898   | 4.06174      | 11.1922          | -1.46232                      | 5.00E-05 | 0.00170056 |
| NM_198492.3    | 339390      | CLEC4G       | 1360   | 7.34315      | 0.666522         | 3.46167                       | 5.00E-05 | 0.00170056 |
| NM_001079910.1 | 84125       | LRR1Q1       | 5444   | 13.4672      | 38.2467          | -1.50589                      | 5.00E-05 | 0.00170056 |
| NM_002988.2    | 6362        | CCL18        | 770    | 279.754      | 3.92204          | 6.15641                       | 5.00E-05 | 0.00170056 |
| NM_182904.3    | 283208      | P4HA3        | 2269   | 0.895331     | 3.45677          | -1.94893                      | 5.00E-05 | 0.00170056 |
| NM_001030060.2 | 389432      | SAMD5        | 6324   | 12.1427      | 5.75933          | 1.07612                       | 5.00E-05 | 0.00170056 |
| NM_178135.3    | 345275      | HSD17B13     | 2395   | 13.96        | 1.33494          | 3.38645                       | 5.00E-05 | 0.00170056 |
| NM_005708.3    | 10082       | GPC6         | 7103   | 2.27758      | 7.78379          | -1.77297                      | 5.00E-05 | 0.00170056 |
| NM_024867.3    | 79925       | SPEF2        | 5638   | 5.444        | 14.8329          | -1.44606                      | 5.00E-05 | 0.00170056 |
| NM_001385.2    | 1807        | DPYS         | 2123   | 22.548       | 2.31227          | 3.28562                       | 5.00E-05 | 0.00170056 |
| NM_181711.2    | 160622      | GRASP        | 1932   | 8.23946      | 2.6652           | 1.6283                        | 5.00E-05 | 0.00170056 |
| NM_000619.2    | 3458        | IFNG         | 1210   | 1.22678      | 5.42209          | -2.14397                      | 5.00E-05 | 0.00170056 |
| NM_000139.4    | 2206        | MS4A2        | 3648   | 27.5668      | 12.6324          | 1.1258                        | 5.00E-05 | 0.00170056 |

|                |        |           |       |          |          |           |          |            |
|----------------|--------|-----------|-------|----------|----------|-----------|----------|------------|
| NM_006952.3    | 7348   | UPK1B     | 2058  | 22.9899  | 9.55285  | 1.267     | 5.00E-05 | 0.00170056 |
| NM_178504.4    | 201625 | DNAH12    | 9542  | 12.8389  | 25.6993  | -1.0012   | 5.00E-05 | 0.00170056 |
| NM_014466.2    | 27285  | TEKT2     | 1509  | 5.07481  | 14.8239  | -1.5465   | 5.00E-05 | 0.00170056 |
| NM_005627.3    | 6446   | SGK1      | 2407  | 134.757  | 52.5569  | 1.3584    | 5.00E-05 | 0.00170056 |
| NM_203347.1    | 389812 | LCN15     | 762   | 125.98   | 0        | inf       | 5.00E-05 | 0.00170056 |
| NM_173494.1    | 139212 | CXorf41   | 1652  | 3.14892  | 11.7898  | -1.90462  | 5.00E-05 | 0.00170056 |
| NM_002581.3    | 5069   | PAPPA     | 10970 | 32.4343  | 8.36582  | 1.95494   | 5.00E-05 | 0.00170056 |
| NM_024807.2    | 79865  | TREML2    | 3758  | 2.55859  | 0.848817 | 1.59182   | 5.00E-05 | 0.00170056 |
| NM_178827.4    | 154865 | IQUB      | 3115  | 8.04017  | 20.2699  | -1.33404  | 5.00E-05 | 0.00170056 |
| NM_031956.2    | 83894  | TTC29     | 1786  | 8.44536  | 24.6804  | -1.54713  | 5.00E-05 | 0.00170056 |
| NM_003014.3    | 6424   | SFRP4     | 2974  | 7.14851  | 25.1784  | -1.81647  | 5.00E-05 | 0.00170056 |
| NM_012144.2    | 27019  | DNAI1     | 2521  | 7.08097  | 18.7593  | -1.40558  | 5.00E-05 | 0.00170056 |
| NM_001040429.2 | 27253  | PCDH17    | 8009  | 6.79971  | 2.85158  | 1.25371   | 5.00E-05 | 0.00170056 |
| NM_020056.4    | 3118   | HLA-DQA2  | 1152  | 12.8987  | 82.7047  | -2.68074  | 5.00E-05 | 0.00170056 |
| NM_001242480.1 | 389831 | LOC389831 | 2413  | 19.4036  | 36.5778  | -0.914641 | 5.00E-05 | 0.00170056 |
| NM_021822.3    | 60489  | APOBEC3G  | 1834  | 12.9428  | 26.6973  | -1.04454  | 5.00E-05 | 0.00170056 |
| NM_138295.3    | 168507 | PKD1L1    | 9075  | 0.880432 | 0.267842 | 1.71683   | 5.00E-05 | 0.00170056 |
| NM_018725.3    | 55540  | IL17RB    | 2040  | 9.24144  | 2.84882  | 1.69775   | 5.00E-05 | 0.00170056 |
| NM_000624.4    | 5104   | SERPINA5  | 2312  | 2.31715  | 0.420878 | 2.46087   | 5.00E-05 | 0.00170056 |
| NM_001077710.2 | 642273 | FAM110C   | 3963  | 10.7553  | 3.19997  | 1.74892   | 5.00E-05 | 0.00170056 |
| NM_004833.1    | 9447   | AIM2      | 1484  | 3.5985   | 10.6108  | -1.56007  | 5.00E-05 | 0.00170056 |
| NM_000491.3    | 713    | C1QB      | 1044  | 61.5335  | 159.757  | -1.37643  | 5.00E-05 | 0.00170056 |
| NM_001045.4    | 6532   | SLC6A4    | 4535  | 1.48573  | 0.287194 | 2.37107   | 5.00E-05 | 0.00170056 |
| NM_001114753.1 | 2022   | ENG       | 3060  | 14.5795  | 6.1504   | 1.24519   | 5.00E-05 | 0.00170056 |
| NM_178456.2    | 128602 | C20orf85  | 760   | 39.5108  | 128.827  | -1.70512  | 5.00E-05 | 0.00170056 |
| NM_033102.2    | 85414  | SLC45A3   | 3382  | 4.70164  | 1.60382  | 1.55165   | 5.00E-05 | 0.00170056 |
| NM_012244.2    | 23428  | SLC7A8    | 4216  | 13.9423  | 4.97323  | 1.48721   | 5.00E-05 | 0.00170056 |
| NM_006424.2    | 10568  | SLC34A2   | 4153  | 1.48279  | 12.6765  | -3.09577  | 5.00E-05 | 0.00170056 |
| NM_130852.2    | 51297  | PLUNC     | 1078  | 220.459  | 1401.58  | -2.66847  | 5.00E-05 | 0.00170056 |
| NM_000673.4    | 131    | ADH7      | 2289  | 76.0395  | 21.6311  | 1.81364   | 5.00E-05 | 0.00170056 |
| NM_001005337.2 | 5317   | PKP1      | 5384  | 6.19607  | 2.35289  | 1.39692   | 5.00E-05 | 0.00170056 |
| NM_000561.3    | 2944   | GSTM1     | 1185  | 0        | 6.21685  | #NAME?    | 5.00E-05 | 0.00170056 |
| NM_001100159.1 | 136288 | C7orf57   | 2125  | 3.93158  | 10.6917  | -1.44331  | 5.00E-05 | 0.00170056 |
| NM_145047.4    | 127700 | OSCP1     | 1489  | 11.4481  | 29.013   | -1.3416   | 5.00E-05 | 0.00170056 |
| NM_022454.3    | 64321  | SOX17     | 2350  | 6.34451  | 2.03709  | 1.639     | 5.00E-05 | 0.00170056 |
| NM_000593.5    | 6890   | TAP1      | 2952  | 21.0098  | 51.1937  | -1.28491  | 5.00E-05 | 0.00170056 |
| NM_144715.3    | 151651 | EFHB      | 2857  | 8.40831  | 21.6835  | -1.36671  | 5.00E-05 | 0.00170056 |
| NM_013272.3    | 28232  | SLCO3A1   | 5106  | 7.86589  | 3.4666   | 1.18209   | 5.00E-05 | 0.00170056 |
| NM_002965.3    | 6280   | S100A9    | 577   | 31.6324  | 86.7818  | -1.45599  | 5.00E-05 | 0.00170056 |
| NM_001010940.1 | 138255 | C9orf135  | 851   | 11.6641  | 33.2104  | -1.50956  | 5.00E-05 | 0.00170056 |
| NM_178821.1    | 164781 | WDR69     | 1669  | 9.13292  | 27.0595  | -1.56699  | 5.00E-05 | 0.00170056 |
| NM_005529.5    | 3339   | HSPG2     | 14288 | 19.8768  | 7.81614  | 1.34655   | 5.00E-05 | 0.00170056 |
| NM_000587.2    | 730    | C7        | 4012  | 54.5242  | 21.6512  | 1.33245   | 5.00E-05 | 0.00170056 |
| NM_001064.3    | 7086   | TKT       | 2164  | 48.736   | 24.1797  | 1.01119   | 5.00E-05 | 0.00170056 |
| NM_012443.2    | 9576   | SPAG6     | 2594  | 16.7179  | 40.3973  | -1.27287  | 5.00E-05 | 0.00170056 |
| NM_006398.3    | 10537  | UBD       | 990   | 17.7337  | 152.781  | -3.1069   | 5.00E-05 | 0.00170056 |
| NM_004585.3    | 5920   | RARRES3   | 765   | 40.8208  | 118.171  | -1.53349  | 5.00E-05 | 0.00170056 |
| NM_138636.4    | 51311  | TLR8      | 4216  | 4.28323  | 9.59225  | -1.16317  | 5.00E-05 | 0.00170056 |
| NM_001109.4    | 101    | ADAM8     | 3301  | 12.3708  | 3.4303   | 1.85053   | 5.00E-05 | 0.00170056 |
| NM_001030287.2 | 467    | ATF3      | 1899  | 45.0643  | 7.01839  | 2.68277   | 5.00E-05 | 0.00170056 |
| NM_002659.3    | 5329   | PLAUR     | 1553  | 17.4066  | 2.68152  | 2.69851   | 5.00E-05 | 0.00170056 |
| NM_024832.3    | 79890  | RIN3      | 3849  | 4.9286   | 1.68463  | 1.54874   | 5.00E-05 | 0.00170056 |
| NM_004460.2    | 2191   | FAP       | 2780  | 19.0462  | 5.92264  | 1.68519   | 5.00E-05 | 0.00170056 |
| NM_152376.3    | 127733 | UBXN10    | 2972  | 12.5561  | 28.6263  | -1.18895  | 5.00E-05 | 0.00170056 |

|                |             |           |       |          |          |           |          |            |
|----------------|-------------|-----------|-------|----------|----------|-----------|----------|------------|
| NM_145054.4    | 146845      | WDR16     | 2193  | 5.82124  | 20.0533  | -1.78444  | 5.00E-05 | 0.00170056 |
| NM_001127380.2 | 6289        | SAA2      | 2043  | 2.72395  | 45.6897  | -4.0681   | 5.00E-05 | 0.00170056 |
| NM_002229.2    | 3726        | JUNB      | 1816  | 148.001  | 27.4683  | 2.42976   | 5.00E-05 | 0.00170056 |
| NM_001679.2    | 483         | ATP1B3    | 1853  | 62.2088  | 31.0433  | 1.00284   | 5.00E-05 | 0.00170056 |
| NM_033027.3    | 64651       | CSRP1     | 3188  | 35.6808  | 5.05652  | 2.81893   | 5.00E-05 | 0.00170056 |
| NM_015474.3    | 25939       | SAMHD1    | 3189  | 62.4625  | 119.501  | -0.935957 | 5.00E-05 | 0.00170056 |
| TCONS_00003383 | XLOC_000243 | -         | 4161  | 0.938795 | 3.65575  | -1.96129  | 5.00E-05 | 0.00170056 |
| NM_002825.5    | 5764        | PTN       | 1549  | 15.0362  | 33.1337  | -1.13986  | 5.00E-05 | 0.00170056 |
| NM_003154.2    | 6779        | STATH     | 600   | 25.9122  | 229.559  | -3.14717  | 5.00E-05 | 0.00170056 |
| TCONS_00000172 | XLOC_000042 | -         | 1923  | 0.669346 | 4.18223  | -2.64345  | 5.00E-05 | 0.00170056 |
| NM_002164.5    | 3620        | IDO1      | 1931  | 11.7424  | 102.462  | -3.12529  | 5.00E-05 | 0.00170056 |
| NM_018689.1    | 57214       | KIAA1199  | 7080  | 8.91771  | 3.09974  | 1.52453   | 5.00E-05 | 0.00170056 |
| NM_032571.3    | 84658       | EMR3      | 2301  | 15.9376  | 0.692458 | 4.52456   | 5.00E-05 | 0.00170056 |
| NM_052941.4    | 115361      | GBP4      | 6145  | 12.4544  | 47.9685  | -1.94543  | 5.00E-05 | 0.00170056 |
| NM_001911.2    | 1511        | CTSG      | 924   | 46.5036  | 19.4127  | 1.26034   | 5.00E-05 | 0.00170056 |
| NM_004352.3    | 869         | CBLN1     | 2435  | 0.296986 | 3.4078   | -3.52037  | 5.00E-05 | 0.00170056 |
| NM_002125.3    | 3127        | HLA-DRB5  | 1171  | 5.43834  | 18.4272  | -1.7606   | 5.00E-05 | 0.00170056 |
| NM_032211.6    | 84171       | LOXL4     | 3657  | 25.2029  | 8.10854  | 1.63608   | 5.00E-05 | 0.00170056 |
| NM_001010860.1 | 161394      | SAMD15    | 2025  | 5.89604  | 17.4678  | -1.56688  | 5.00E-05 | 0.00170056 |
| NM_145252.2    | 124220      | ZG16B     | 828   | 13.1537  | 142.959  | -3.44207  | 5.00E-05 | 0.00170056 |
| NM_025184.3    | 80258       | EFHC2     | 3252  | 5.64227  | 12.8029  | -1.18212  | 5.00E-05 | 0.00170056 |
| NM_015675.3    | 4616        | GADD45B   | 1375  | 52.339   | 22.245   | 1.23441   | 5.00E-05 | 0.00170056 |
| NM_001554.4    | 3491        | CYR61     | 2295  | 110.679  | 33.3372  | 1.73118   | 5.00E-05 | 0.00170056 |
| NM_012397.3    | 5275        | SERPINB13 | 3180  | 17.1446  | 4.67778  | 1.87386   | 5.00E-05 | 0.00170056 |
| NM_001122679.1 | 57451       | ODZ2      | 9645  | 2.22314  | 0.666911 | 1.73703   | 5.00E-05 | 0.00170056 |
| NM_001423.2    | 2012        | EMP1      | 2804  | 79.8619  | 33.5609  | 1.25073   | 5.00E-05 | 0.00170056 |
| NM_004508.2    | 3422        | IDI1      | 2137  | 65.5286  | 34.0123  | 0.946069  | 5.00E-05 | 0.00170056 |
| NM_005215.3    | 1630        | DCC       | 10210 | 0.681179 | 2.03395  | -1.57818  | 5.00E-05 | 0.00170056 |
| NM_002115.2    | 3101        | HK3       | 3068  | 15.1287  | 2.26953  | 2.73682   | 5.00E-05 | 0.00170056 |
| TCONS_00165587 | XLOC_013757 | -         | 437   | 2.9392   | 0        | inf       | 5.00E-05 | 0.00170056 |
| NM_004363.2    | 1048        | CEACAM5   | 3600  | 41.1753  | 12.0636  | 1.77112   | 5.00E-05 | 0.00170056 |
| NM_000441.1    | 5172        | SLC26A4   | 4930  | 2.74147  | 23.743   | -3.11448  | 5.00E-05 | 0.00170056 |
| NM_006691.3    | 10894       | LYVE1     | 2500  | 44.01    | 17.5119  | 1.32949   | 5.00E-05 | 0.00170056 |
| NM_178813.5    | 158798      | AKAP14    | 841   | 6.71294  | 25.4297  | -1.9215   | 5.00E-05 | 0.00170056 |
| NM_002977.3    | 6335        | SCN9A     | 9762  | 4.71871  | 1.92345  | 1.29469   | 5.00E-05 | 0.00170056 |
| TCONS_00032728 | XLOC_003418 | -         | 2076  | 4.3234   | 24.8047  | -2.52037  | 5.00E-05 | 0.00170056 |
| NM_003955.3    | 9021        | SOCS3     | 2734  | 117.977  | 15.2486  | 2.95176   | 5.00E-05 | 0.00170056 |
| NM_020361.4    | 57094       | CPA6      | 1904  | 2.69584  | 0.339249 | 2.99032   | 5.00E-05 | 0.00170056 |
| NM_017855.3    | 54959       | ODAM      | 1288  | 54.2032  | 11.1002  | 2.28779   | 5.00E-05 | 0.00170056 |
| TCONS_00084037 | XLOC_006761 | -         | 5365  | 0.460879 | 1.77578  | -1.946    | 5.00E-05 | 0.00170056 |
| NM_145020.3    | 220136      | CCDC11    | 1824  | 6.70235  | 24.2448  | -1.85494  | 5.00E-05 | 0.00170056 |
| TCONS_00182914 | XLOC_015690 | -         | 3636  | 1.51196  | 0.327743 | 2.20578   | 5.00E-05 | 0.00170056 |
| NM_004335.2    | 684         | BST2      | 939   | 52.2967  | 115.619  | -1.14458  | 5.00E-05 | 0.00170056 |
| NM_152687.2    | 202309      | GAPT      | 2216  | 28.9959  | 9.6277   | 1.59059   | 5.00E-05 | 0.00170056 |
| NM_004907.2    | 9592        | IER2      | 2050  | 29.3684  | 8.68455  | 1.75774   | 5.00E-05 | 0.00170056 |
| NM_000358.2    | 7045        | TGFBI     | 2805  | 82.931   | 35.0993  | 1.24047   | 5.00E-05 | 0.00170056 |
| NM_006417.4    | 10561       | IFI44     | 1726  | 35.34    | 70.0541  | -0.987166 | 5.00E-05 | 0.00170056 |
| NM_004994.2    | 4318        | MMP9      | 2336  | 0.916865 | 4.45143  | -2.27949  | 5.00E-05 | 0.00170056 |
| NM_152891.2    | 260429      | PRSS33    | 1694  | 3.18508  | 0.190408 | 4.06416   | 5.00E-05 | 0.00170056 |
| NM_001870.2    | 1359        | CPA3      | 1686  | 264.984  | 74.1552  | 1.83729   | 5.00E-05 | 0.00170056 |
| NM_053285.1    | 83659       | TEKT1     | 1413  | 20.1326  | 56.4848  | -1.48833  | 5.00E-05 | 0.00170056 |
| NM_000930.3    | 5327        | PLAT      | 3173  | 5.84999  | 13.9735  | -1.25619  | 5.00E-05 | 0.00170056 |
| NM_002123.3    | 3119        | HLA-DQB1  | 1224  | 89.406   | 16.6794  | 2.42231   | 5.00E-05 | 0.00170056 |
| NM_152754.2    | 223117      | SEMA3D    | 6261  | 6.78436  | 29.9333  | -2.14147  | 5.00E-05 | 0.00170056 |

|                   |              |              |       |          |          |          |          |            |
|-------------------|--------------|--------------|-------|----------|----------|----------|----------|------------|
| NM_153264.5       | 256076       | COL6A5       | 8878  | 6.48335  | 0.114455 | 5.82389  | 5.00E-05 | 0.00170056 |
| NM_005564.3       | 3934         | LCN2         | 822   | 153.325  | 603.048  | -1.97568 | 5.00E-05 | 0.00170056 |
| NM_000600.3       | 3569         | IL6          | 1184  | 13.8138  | 0.694924 | 4.31312  | 5.00E-05 | 0.00170056 |
| NM_199347.2       | 152110       | NEK10        | 2639  | 11.1674  | 30.0566  | -1.42838 | 5.00E-05 | 0.00170056 |
| NM_001130958.1    | 2172         | FABP6        | 743   | 7.31356  | 28.9934  | -1.98708 | 5.00E-05 | 0.00170056 |
| NM_018950.2       | 3134         | HLA-F        | 1284  | 38.2524  | 91.3257  | -1.25547 | 5.00E-05 | 0.00170056 |
| NM_025052.3       | 80122        | YSK4         | 4165  | 7.89697  | 20.0636  | -1.34521 | 5.00E-05 | 0.00170056 |
| NM_001005473.2    | 345557       | PLCXD3       | 7739  | 0.342657 | 1.50795  | -2.13775 | 5.00E-05 | 0.00170056 |
| NM_144701.2       | 149233       | IL23R        | 2826  | 0.338423 | 1.52114  | -2.16826 | 5.00E-05 | 0.00170056 |
| NM_052901.2       | 114789       | SLC25A25     | 3240  | 21.564   | 8.5941   | 1.32721  | 5.00E-05 | 0.00170056 |
| TCONS_00037389    | XLOC_003418  | -            | 566   | 11.1642  | 95.7409  | -3.10026 | 5.00E-05 | 0.00170056 |
| TCONS_00037388    | XLOC_003418  | -            | 788   | 10.2059  | 88.8672  | -3.12225 | 5.00E-05 | 0.00170056 |
| NM_152750.4       | 222256       | CDHR3        | 6500  | 11.7392  | 27.2359  | -1.21418 | 5.00E-05 | 0.00170056 |
| NM_033397.2       | 85450        | ITPRIP       | 4364  | 10.4546  | 2.73862  | 1.93261  | 5.00E-05 | 0.00170056 |
| NM_004469.4       | 2277         | FIGF         | 2074  | 0.477196 | 2.78932  | -2.54726 | 5.00E-05 | 0.00170056 |
| NM_001008723.1    | 159686       | CCDC147      | 3313  | 3.64312  | 10.3805  | -1.51063 | 5.00E-05 | 0.00170056 |
| NM_020689.3       | 57419        | SLC24A3      | 3889  | 3.34955  | 1.15336  | 1.53813  | 5.00E-05 | 0.00170056 |
| NM_004223.4       | 9246         | UBE2L6       | 1261  | 31.5058  | 70.8983  | -1.17014 | 5.00E-05 | 0.00170056 |
| NM_002994.3       | 6374         | CXCL5        | 2458  | 0.174158 | 3.02738  | -4.1196  | 5.00E-05 | 0.00170056 |
| XM_003403441.1    | 401258       | RAB44        | 2557  | 4.65397  | 0.242598 | 4.26182  | 5.00E-05 | 0.00170056 |
| NM_182920.1       | 56999        | ADAMTS9      | 7313  | 20.4174  | 6.44703  | 1.66309  | 5.00E-05 | 0.00170056 |
| NM_152997.2       | 260436       | C4orf7       | 539   | 100.371  | 600.743  | -2.58141 | 5.00E-05 | 0.00170056 |
| NM_145038.2       | 92749        | CCDC164      | 2491  | 12.9269  | 36.7338  | -1.50674 | 5.00E-05 | 0.00170056 |
| NM_001805.2       | 1053         | CEBPE        | 1201  | 8.15414  | 0.463621 | 4.13652  | 5.00E-05 | 0.00170056 |
| NM_019844.2       | 28234        | SLCO1B3      | 2712  | 1.38932  | 6.05366  | -2.12343 | 5.00E-05 | 0.00170056 |
| NM_014080.4       | 50506        | DUOX2        | 6346  | 0.811028 | 3.22798  | -1.99281 | 5.00E-05 | 0.00170056 |
| NM_174892.2       | 124599       | CD300LB      | 2294  | 5.65704  | 0.978126 | 2.53195  | 5.00E-05 | 0.00170056 |
| NM_004049.3       | 597          | BCL2A1       | 887   | 63.1543  | 14.7406  | 2.09909  | 5.00E-05 | 0.00170056 |
| NM_001145848.1    | 8842         | PROM1        | 3973  | 41.6027  | 106.641  | -1.35801 | 5.00E-05 | 0.00170056 |
| NM_002167.3       | 3399         | ID3          | 1288  | 52.1784  | 21.4764  | 1.2807   | 5.00E-05 | 0.00170056 |
| NM_002318.2       | 4017         | LOXL2        | 3810  | 11.6407  | 3.40112  | 1.7751   | 5.00E-05 | 0.00170056 |
| NM_000570.3       | 2215         | FCGR3B       | 2295  | 3.41392  | 12.5334  | -1.87627 | 5.00E-05 | 0.00170056 |
| ENST00000482351.1 | ENSG00000244 | RP11-88H10.2 | 624   | 1.79186  | 0        | inf      | 5.00E-05 | 0.00170056 |
| NM_000963.2       | 5743         | PTGS2        | 4493  | 41.232   | 15.1943  | 1.44023  | 5.00E-05 | 0.00170056 |
| NM_002458.2       | 727897       | MUC5B        | 17916 | 5.19697  | 33.8068  | -2.70157 | 5.00E-05 | 0.00170056 |
| NM_001098526.1    | 120425       | AMICA1       | 1957  | 62.688   | 28.6569  | 1.12931  | 5.00E-05 | 0.00170056 |
| NM_002648.3       | 5292         | PIM1         | 2709  | 31.7851  | 11.6142  | 1.45246  | 5.00E-05 | 0.00170056 |
| NM_004621.5       | 7225         | TRPC6        | 4612  | 7.72301  | 1.98776  | 1.95802  | 5.00E-05 | 0.00170056 |
| NM_007315.3       | 6772         | STAT1        | 4308  | 52.1415  | 294.177  | -2.49618 | 5.00E-05 | 0.00170056 |
| NM_001039845.1    | 130752       | MDH1B        | 2332  | 8.98692  | 22.3971  | -1.31741 | 5.00E-05 | 0.00170056 |
| NM_000860.4       | 3248         | HPGD         | 2770  | 45.0813  | 8.23367  | 2.45292  | 5.00E-05 | 0.00170056 |
| NM_206963.1       | 5918         | RARRES1      | 1526  | 111.904  | 300.035  | -1.42287 | 5.00E-05 | 0.00170056 |
| NM_000064.2       | 718          | C3           | 5101  | 23.4449  | 140.483  | -2.58305 | 5.00E-05 | 0.00170056 |
| NM_018004.1       | 55076        | TMEM45A      | 1564  | 7.37206  | 38.1525  | -2.37164 | 5.00E-05 | 0.00170056 |
| NM_153840.2       | 266977       | GPR110       | 3078  | 6.44467  | 16.1124  | -1.32199 | 5.00E-05 | 0.00170056 |
| NM_001002912.4    | 127254       | C1orf173     | 7159  | 12.8494  | 30.716   | -1.25728 | 5.00E-05 | 0.00170056 |
| NM_000602.3       | 5054         | SERPINE1     | 3181  | 22.7471  | 4.26985  | 2.41343  | 5.00E-05 | 0.00170056 |
| NM_152703.2       | 219285       | SAMD9L       | 7133  | 17.7707  | 38.3726  | -1.11058 | 5.00E-05 | 0.00170056 |
| NM_030817.2       | 81575        | APOLD1       | 4646  | 76.8949  | 6.42961  | 3.58008  | 5.00E-05 | 0.00170056 |
| NM_005560.3       | 3911         | LAMA5        | 11426 | 7.83795  | 3.17577  | 1.30337  | 5.00E-05 | 0.00170056 |
| NM_001543.4       | 3340         | NDST1        | 8030  | 17.1326  | 7.986    | 1.1012   | 5.00E-05 | 0.00170056 |
| NM_133493.3       | 135228       | CD109        | 9447  | 10.9258  | 5.31361  | 1.03997  | 5.00E-05 | 0.00170056 |
| NM_015964.2       | 51673        | TPPP3        | 1041  | 43.9425  | 111.546  | -1.34395 | 5.00E-05 | 0.00170056 |
| NM_006084.4       | 10379        | IRF9         | 1678  | 31.5489  | 64.6565  | -1.03521 | 5.00E-05 | 0.00170056 |

|                |             |              |       |          |          |          |          |            |
|----------------|-------------|--------------|-------|----------|----------|----------|----------|------------|
| NM_152403.3    | 133584      | EGFLAM       | 4870  | 3.71132  | 0.800839 | 2.21235  | 5.00E-05 | 0.00170056 |
| NM_001992.3    | 2149        | F2R          | 3810  | 35.0886  | 17.1369  | 1.0339   | 5.00E-05 | 0.00170056 |
| NM_003966.2    | 9037        | SEMA5A       | 11808 | 33.7242  | 14.6351  | 1.20435  | 5.00E-05 | 0.00170056 |
| NM_017912.3    | 55008       | HERC6        | 3889  | 7.19667  | 16.2423  | -1.17436 | 5.00E-05 | 0.00170056 |
| NM_001547.4    | 3433        | IFIT2        | 3495  | 9.62328  | 21.6677  | -1.17094 | 5.00E-05 | 0.00170056 |
| NM_004235.4    | 9314        | KLF4         | 2933  | 28.586   | 10.1     | 1.50095  | 5.00E-05 | 0.00170056 |
| NM_001257.4    | 1012        | CDH13        | 4021  | 9.97041  | 3.74921  | 1.41107  | 5.00E-05 | 0.00170056 |
| TCONS_00155673 | XLOC_013982 | -            | 9015  | 0.546383 | 1.83943  | -1.75128 | 5.00E-05 | 0.00170056 |
| NM_003999.2    | 9180        | OSMR         | 5539  | 36.0999  | 15.6798  | 1.20309  | 5.00E-05 | 0.00170056 |
| NM_004165.2    | 6236        | RRAD         | 1467  | 7.86083  | 22.5121  | -1.51795 | 5.00E-05 | 0.00170056 |
| NM_199161.3    | 6288        | SAA1         | 531   | 25.3424  | 405.123  | -3.99873 | 5.00E-05 | 0.00170056 |
| NM_014485.2    | 27306       | HPGDS        | 1615  | 16.8697  | 3.97371  | 2.08588  | 5.00E-05 | 0.00170056 |
| NM_005253.3    | 2355        | FOSL2        | 3991  | 51.0057  | 14.8043  | 1.78465  | 5.00E-05 | 0.00170056 |
| NM_030754.4    | 6289        | SAA2         | 594   | 6.43837  | 160.834  | -4.64274 | 5.00E-05 | 0.00170056 |
| NM_005532.3    | 3429        | IFI27        | 652   | 63.9962  | 171.702  | -1.42385 | 5.00E-05 | 0.00170056 |
| NM_002112.3    | 3067        | HDC          | 2644  | 16.561   | 4.25304  | 1.96122  | 5.00E-05 | 0.00170056 |
| NM_000361.2    | 7056        | THBD         | 4032  | 14.9135  | 3.7109   | 2.00677  | 5.00E-05 | 0.00170056 |
| NM_006192.3    | 5075        | PAX1         | 2838  | 0.251571 | 1.37662  | -2.45209 | 5.00E-05 | 0.00170056 |
| NM_007226.2    | 11249       | NXPH2        | 2560  | 1.74995  | 9.77365  | -2.48158 | 5.00E-05 | 0.00170056 |
| NM_022159.3    | 64123       | ELTD1        | 3619  | 41.0828  | 19.087   | 1.10594  | 5.00E-05 | 0.00170056 |
| NM_001031743.2 | 154313      | C6orf165     | 2215  | 11.9943  | 33.6332  | -1.48754 | 5.00E-05 | 0.00170056 |
| NM_014996.2    | 23007       | PLCH1        | 6128  | 3.26263  | 8.39061  | -1.36274 | 5.00E-05 | 0.00170056 |
| NM_002863.4    | 5836        | PYGL         | 2846  | 44.2717  | 22.7505  | 0.960484 | 5.00E-05 | 0.00170056 |
| NM_007360.3    | 22914       | KLRK1        | 1589  | 15.9313  | 37.949   | -1.2522  | 5.00E-05 | 0.00170056 |
| NM_002188.2    | 3596        | IL13         | 1282  | 5.26831  | 0.239101 | 4.46165  | 5.00E-05 | 0.00170056 |
| NM_001001548.2 | 948         | CD36         | 4727  | 14.2394  | 3.65396  | 1.96236  | 5.00E-05 | 0.00170056 |
| NM_000433.3    | 4688        | NCF2         | 2412  | 59.3687  | 15.3069  | 1.95552  | 5.00E-05 | 0.00170056 |
| NM_001031683.2 | 3437        | IFIT3        | 2454  | 5.97555  | 40.5776  | -2.76354 | 5.00E-05 | 0.00170056 |
| NM_005408.2    | 6357        | CCL13        | 851   | 168.111  | 2.65448  | 5.98484  | 5.00E-05 | 0.00170056 |
| NM_024593.3    | 79645       | EFCAB1       | 2144  | 11.5378  | 26.5466  | -1.20216 | 5.00E-05 | 0.00170056 |
| NM_004484.3    | 2719        | GPC3         | 2319  | 6.72044  | 2.08326  | 1.68971  | 5.00E-05 | 0.00170056 |
| TCONS_00075737 | XLOC_006473 | -            | 4288  | 4.48866  | 1.71035  | 1.39199  | 5.00E-05 | 0.00170056 |
| NM_000669.3    | 126         | ADH1C        | 1473  | 241.235  | 52.9387  | 2.18804  | 5.00E-05 | 0.00170056 |
| NM_006981.3    | 8013        | NR4A3        | 5634  | 32.0708  | 1.70819  | 4.23072  | 5.00E-05 | 0.00170056 |
| NM_174858.2    | 26289       | AK5          | 3325  | 21.9522  | 9.4081   | 1.22239  | 5.00E-05 | 0.00170056 |
| NM_138796.2    | 128153      | SPATA17      | 1235  | 13.7523  | 38.2346  | -1.47521 | 5.00E-05 | 0.00170056 |
| NM_006103.3    | 10406       | WFDC2        | 566   | 130.577  | 395.577  | -1.59906 | 5.00E-05 | 0.00170056 |
| NM_003741.2    | 8646        | CHRD         | 3521  | 8.22548  | 2.84222  | 1.53308  | 5.00E-05 | 0.00170056 |
| NM_173672.4    | 285755      | PPIL6        | 4128  | 5.46926  | 15.5037  | -1.50319 | 5.00E-05 | 0.00170056 |
| NM_001565.3    | 3627        | CXCL10       | 1216  | 2.8455   | 82.0924  | -4.85049 | 5.00E-05 | 0.00170056 |
| NM_001828.4    | 1178        | CLC          | 630   | 289.985  | 6.45223  | 5.49004  | 5.00E-05 | 0.00170056 |
| NM_002429.4    | 4327        | MMP19        | 3254  | 13.0461  | 3.13006  | 2.05935  | 5.00E-05 | 0.00170056 |
| XM_003403447.1 | 100652938   | LOC100652938 | 5295  | 15.0552  | 4.95798  | 1.60243  | 5.00E-05 | 0.00170056 |
| NM_002976.3    | 6332        | SCN7A        | 7186  | 0.456659 | 1.61744  | -1.82452 | 5.00E-05 | 0.00170056 |
| NM_005764.3    | 10158       | PDZK1IP1     | 894   | 2.61407  | 11.4724  | -2.1338  | 5.00E-05 | 0.00170056 |
| NM_004657.5    | 8436        | SDPR         | 3251  | 58.6547  | 25.6184  | 1.19507  | 5.00E-05 | 0.00170056 |
| NM_018965.2    | 54209       | TREM2        | 1051  | 11.5915  | 2.73135  | 2.08538  | 5.00E-05 | 0.00170056 |
| NM_172218.2    | 6674        | SPAG1        | 3749  | 10.1689  | 22.3618  | -1.13688 | 5.00E-05 | 0.00170056 |
| NM_002357.3    | 4084        | MXD1         | 5617  | 28.2796  | 6.62297  | 2.09421  | 5.00E-05 | 0.00170056 |
| NM_144590.2    | 118932      | ANKRD22      | 3986  | 0.682676 | 4.57059  | -2.74311 | 5.00E-05 | 0.00170056 |
| NM_019074.3    | 54567       | DLL4         | 3420  | 6.17687  | 1.78071  | 1.79442  | 5.00E-05 | 0.00170056 |
| NM_001781.2    | 969         | CD69         | 1676  | 260.814  | 25.6891  | 3.34379  | 5.00E-05 | 0.00170056 |
| NM_197955.1    | 84419       | C15orf48     | 803   | 2.07031  | 26.0488  | -3.6533  | 5.00E-05 | 0.00170056 |
| NM_025145.5    | 80217       | WDR96        | 5365  | 18.3587  | 53.2485  | -1.53628 | 5.00E-05 | 0.00170056 |

|                |             |          |      |          |          |          |          |            |
|----------------|-------------|----------|------|----------|----------|----------|----------|------------|
| NM_001145128.2 | 221264      | AKD1     | 6326 | 4.47272  | 10.3505  | -1.21048 | 5.00E-05 | 0.00170056 |
| NM_001010919.1 | 441168      | FAM26F   | 1109 | 3.51969  | 23.2319  | -2.72259 | 5.00E-05 | 0.00170056 |
| NM_001765.2    | 911         | CD1C     | 2592 | 10.6383  | 2.34992  | 2.17858  | 5.00E-05 | 0.00170056 |
| NM_002993.3    | 6372        | CXCL6    | 1659 | 2.43826  | 16.9881  | -2.8006  | 5.00E-05 | 0.00170056 |
| NM_014479.3    | 27299       | ADAMDEC1 | 2348 | 1.80904  | 32.8639  | -4.18321 | 5.00E-05 | 0.00170056 |
| NM_000677.3    | 140         | ADORA3   | 2245 | 11.4677  | 2.50683  | 2.19363  | 5.00E-05 | 0.00170056 |
| NM_001025109.1 | 947         | CD34     | 2616 | 17.8931  | 7.58058  | 1.23902  | 5.00E-05 | 0.00170056 |
| NM_182705.2    | 359845      | FAM101B  | 3622 | 24.8298  | 5.92615  | 2.0669   | 5.00E-05 | 0.00170056 |
| NM_001164436.1 | 389177      | TMEM212  | 1881 | 7.27232  | 16.9709  | -1.22258 | 5.00E-05 | 0.00170056 |
| NM_005218.3    | 1672        | DEFB1    | 463  | 7.75791  | 46.4878  | -2.58311 | 5.00E-05 | 0.00170056 |
| NM_002928.3    | 6004        | RGS16    | 2432 | 23.6673  | 2.29315  | 3.36749  | 5.00E-05 | 0.00170056 |
| NM_001002235.2 | 5265        | SERPINA1 | 3199 | 6.17486  | 17.1309  | -1.47212 | 5.00E-05 | 0.00170056 |
| NM_001002029.3 | 721         | C4B      | 5427 | 0.761149 | 3.28823  | -2.11106 | 5.00E-05 | 0.00170056 |
| NM_000916.3    | 5021        | OXTR     | 4361 | 46.165   | 10.6985  | 2.1094   | 5.00E-05 | 0.00170056 |
| NM_152327.2    | 122481      | AK7      | 2648 | 12.4514  | 29.7234  | -1.25529 | 5.00E-05 | 0.00170056 |
| NM_002483.4    | 4680        | CEACAM6  | 2631 | 17.4981  | 48.6967  | -1.47663 | 5.00E-05 | 0.00170056 |
| NM_001039.3    | 6340        | SCNN1G   | 3499 | 0.972854 | 8.62819  | -3.14876 | 5.00E-05 | 0.00170056 |
| NM_199327.1    | 10252       | SPRY1    | 2348 | 63.8487  | 14.8285  | 2.10629  | 5.00E-05 | 0.00170056 |
| NM_006169.2    | 4837        | NNMT     | 1578 | 37.273   | 15.5147  | 1.26449  | 5.00E-05 | 0.00170056 |
| NM_002616.2    | 5187        | PER1     | 4709 | 11.9082  | 4.96497  | 1.2621   | 5.00E-05 | 0.00170056 |
| NM_003956.3    | 9023        | CH25H    | 1378 | 26.4124  | 7.25585  | 1.864    | 5.00E-05 | 0.00170056 |
| NM_001145026.1 | 374462      | PTPRQ    | 7612 | 2.97553  | 0.614365 | 2.27598  | 5.00E-05 | 0.00170056 |
| NM_147168.1    | 84688       | C9orf24  | 712  | 14.3379  | 42.1145  | -1.55448 | 5.00E-05 | 0.00170056 |
| NM_001136570.1 | 100129583   | FAM47E   | 1550 | 5.55954  | 14.9331  | -1.42548 | 5.00E-05 | 0.00170056 |
| NM_021254.2    | 56683       | C21orf59 | 1427 | 32.1281  | 70.4615  | -1.133   | 5.00E-05 | 0.00170056 |
| NM_199166.1    | 211         | ALAS1    | 2258 | 45.5571  | 17.6648  | 1.3668   | 5.00E-05 | 0.00170056 |
| TCONS_00207680 | XLOC_017712 | -        | 4806 | 4.42183  | 0.495801 | 3.15681  | 5.00E-05 | 0.00170056 |
| NM_004665.2    | 8875        | VNN2     | 2004 | 3.26765  | 25.001   | -2.93566 | 5.00E-05 | 0.00170056 |
| NM_025153.2    | 23120       | ATP10B   | 7566 | 2.20884  | 10.5547  | -2.25652 | 5.00E-05 | 0.00170056 |
| NM_007293.2    | 720         | C4A      | 5426 | 0.954242 | 2.63952  | -1.46785 | 5.00E-05 | 0.00170056 |
| 28755          | 28755       | -        | 954  | 14.429   | 33.4493  | -1.213   | 5.00E-05 | 0.00170056 |
| NM_001767.3    | 914         | CD2      | 1531 | 14.4474  | 41.1552  | -1.51026 | 5.00E-05 | 0.00170056 |
| NM_002922.3    | 5996        | RGS1     | 1403 | 201.782  | 67.9109  | 1.57108  | 5.00E-05 | 0.00170056 |
| NM_001080537.1 | 132203      | SNTN     | 1586 | 40.4648  | 114.313  | -1.49825 | 5.00E-05 | 0.00170056 |
| NM_002985.2    | 6352        | CCL5     | 1230 | 43.0121  | 138.942  | -1.69167 | 5.00E-05 | 0.00170056 |
| NM_174975.4    | 266629      | SEC14L3  | 2084 | 10.9827  | 1.07783  | 3.34903  | 5.00E-05 | 0.00170056 |
| NM_006183.4    | 4922        | NTS      | 1239 | 61.706   | 0.853768 | 6.17542  | 5.00E-05 | 0.00170056 |
| NM_005354.4    | 3727        | JUND     | 1870 | 42.6208  | 18.7078  | 1.18792  | 5.00E-05 | 0.00170056 |
| NM_170776.4    | 222487      | GPR97    | 2670 | 6.75829  | 0.600766 | 3.49178  | 5.00E-05 | 0.00170056 |
| NM_006108.2    | 10418       | SPON1    | 5384 | 52.9175  | 21.364   | 1.30856  | 5.00E-05 | 0.00170056 |
| NM_030906.2    | 65975       | STK33    | 2707 | 8.00722  | 18.0448  | -1.17221 | 5.00E-05 | 0.00170056 |
| NM_001105248.1 | 79838       | TMC5     | 4917 | 18.3726  | 72.1613  | -1.97367 | 5.00E-05 | 0.00170056 |
| NM_145071.2    | 1154        | CISH     | 2111 | 10.8068  | 3.40118  | 1.66783  | 5.00E-05 | 0.00170056 |
| NM_152548.2    | 153643      | FAM81B   | 1563 | 13.7941  | 39.9278  | -1.53334 | 5.00E-05 | 0.00170056 |
| NM_017625.2    | 55600       | ITLN1    | 1182 | 27.4677  | 1.83576  | 3.90329  | 5.00E-05 | 0.00170056 |
| 3497           | 3497        | -        | 1286 | 12.7504  | 0.369321 | 5.10953  | 5.00E-05 | 0.00170056 |
| 3495           | 3495        | -        | 1154 | 17.7     | 76.9939  | -2.121   | 5.00E-05 | 0.00170056 |
| NM_138961.2    | 90952       | ESAM     | 1869 | 9.79398  | 4.07708  | 1.26436  | 5.00E-05 | 0.00170056 |
| NM_002800.4    | 5698        | PSMB9    | 1048 | 22.3866  | 63.8106  | -1.51116 | 5.00E-05 | 0.00170056 |
| NM_001048265.1 | 138162      | C9orf116 | 722  | 15.5363  | 41.1849  | -1.40647 | 5.00E-05 | 0.00170056 |
| NM_178824.3    | 151790      | WDR49    | 2594 | 12.7196  | 33.0023  | -1.37551 | 5.00E-05 | 0.00170056 |
| NM_002423.3    | 4316        | MMP7     | 1119 | 18.4867  | 110.857  | -2.58414 | 5.00E-05 | 0.00170056 |
| NM_152325.1    | 122046      | C13orf26 | 998  | 13.8285  | 36.1467  | -1.38621 | 5.00E-05 | 0.00170056 |
| NM_005542.4    | 3638        | INSIG1   | 3010 | 40.8928  | 16.2988  | 1.32708  | 5.00E-05 | 0.00170056 |

|                |             |           |       |         |          |          |          |            |
|----------------|-------------|-----------|-------|---------|----------|----------|----------|------------|
| NM_139172.1    | 147744      | TMEM190   | 593   | 16.509  | 50.7678  | -1.62066 | 5.00E-05 | 0.00170056 |
| NM_001843.2    | 1272        | CNTN1     | 3427  | 28.3843 | 12.8639  | 1.14176  | 5.00E-05 | 0.00170056 |
| NM_012409.2    | 23627       | PRND      | 3980  | 2.1365  | 0.375937 | 2.50669  | 5.00E-05 | 0.00170056 |
| NM_001447.2    | 2196        | FAT2      | 14536 | 20.1554 | 8.4315   | 1.2573   | 5.00E-05 | 0.00170056 |
| NM_005306.2    | 2867        | FFAR2     | 2053  | 9.19102 | 1.82213  | 2.3346   | 5.00E-05 | 0.00170056 |
| NM_173354.3    | 150094      | SIK1      | 4706  | 45.1877 | 14.1567  | 1.67444  | 5.00E-05 | 0.00170056 |
| NM_016270.2    | 10365       | KLF2      | 1655  | 26.6601 | 9.00422  | 1.56601  | 5.00E-05 | 0.00170056 |
| TCONS_00103444 | XLOC_008124 | -         | 1958  | 17.9778 | 40.7763  | -1.18152 | 5.00E-05 | 0.00170056 |
| NM_199355.2    | 170692      | ADAMTS18  | 5913  | 2.74299 | 0.55061  | 2.31664  | 5.00E-05 | 0.00170056 |
| NM_005252.3    | 2353        | FOS       | 2158  | 486.04  | 44.4     | 3.45244  | 5.00E-05 | 0.00170056 |
| NM_006820.2    | 10964       | IFI44L    | 5874  | 13.0691 | 36.7922  | -1.49323 | 5.00E-05 | 0.00170056 |
| NM_006763.2    | 7832        | BTG2      | 2712  | 210.617 | 76.3341  | 1.46422  | 5.00E-05 | 0.00170056 |
| NM_024763.4    | 79819       | WDR78     | 3848  | 15.1305 | 37.2977  | -1.30163 | 5.00E-05 | 0.00170056 |
| NM_020848.2    | 57608       | KIAA1462  | 9300  | 11.7107 | 6.01114  | 0.962114 | 5.00E-05 | 0.00170056 |
| NM_001199201.1 | 79740       | ZBBX      | 3363  | 13.8194 | 36.1335  | -1.38664 | 5.00E-05 | 0.00170056 |
| NM_182508.2    | 144809      | C13orf30  | 3302  | 35.1799 | 81.0755  | -1.20451 | 5.00E-05 | 0.00170056 |
| TCONS_00070151 | XLOC_006346 | -         | 298   | 3.1271  | 0        | inf      | 5.00E-05 | 0.00170056 |
| NM_006088.5    | 10383       | TUBB2C    | 1591  | 115.61  | 247.579  | -1.09863 | 5.00E-05 | 0.00170056 |
| NM_002089.3    | 2920        | CXCL2     | 1205  | 67.4621 | 6.53973  | 3.36677  | 5.00E-05 | 0.00170056 |
| NM_005409.4    | 6373        | CXCL11    | 1606  | 1.36176 | 25.3491  | -4.2184  | 5.00E-05 | 0.00170056 |
| NM_001010892.2 | 345895      | RSPH4A    | 2840  | 19.0418 | 54.2393  | -1.51017 | 5.00E-05 | 0.00170056 |
| NM_012337.2    | 25790       | CCDC19    | 1795  | 10.0455 | 33.2433  | -1.72652 | 5.00E-05 | 0.00170056 |
| NM_001898.2    | 1469        | CST1      | 760   | 985.484 | 0.568934 | 10.7584  | 5.00E-05 | 0.00170056 |
| NM_176813.3    | 155465      | AGR3      | 750   | 23.579  | 59.9177  | -1.34548 | 5.00E-05 | 0.00170056 |
| NM_001145450.1 | 729967      | MORN2     | 741   | 43.5044 | 114.162  | -1.39185 | 5.00E-05 | 0.00170056 |
| NM_000668.4    | 125         | ADH1B     | 2682  | 1.79125 | 5.48494  | -1.61451 | 5.00E-05 | 0.00170056 |
| NM_001974.3    | 2015        | EMR1      | 3123  | 19.6724 | 1.82071  | 3.4336   | 5.00E-05 | 0.00170056 |
| NM_004040.2    | 388         | RHOB      | 2367  | 151.131 | 52.2405  | 1.53256  | 5.00E-05 | 0.00170056 |
| NM_212559.2    | 402415      | XKRX      | 2851  | 2.05415 | 5.38637  | -1.39077 | 5.00E-05 | 0.00170056 |
| NM_003062.2    | 6586        | SLIT3     | 5380  | 14.1848 | 6.12088  | 1.21253  | 5.00E-05 | 0.00170056 |
| NM_001190766.1 | 401236      | FLJ23152  | 1322  | 4.34761 | 15.7153  | -1.85388 | 5.00E-05 | 0.00170056 |
| NM_005424.2    | 7075        | TIE1      | 3882  | 7.61257 | 3.14778  | 1.27405  | 5.00E-05 | 0.00170056 |
| NM_148672.2    | 56477       | CCL28     | 816   | 12.4647 | 35.2447  | -1.49955 | 5.00E-05 | 0.00170056 |
| NM_005338.4    | 3092        | HIP1      | 7239  | 11.9612 | 5.0498   | 1.24406  | 5.00E-05 | 0.00170056 |
| NM_012128.3    | 22802       | CLCA4     | 3213  | 3.14861 | 9.70005  | -1.62328 | 5.00E-05 | 0.00170056 |
| NM_002426.4    | 4321        | MMP12     | 1876  | 1.79022 | 8.25199  | -2.2046  | 5.00E-05 | 0.00170056 |
| NM_018326.2    | 55303       | GIMAP4    | 1965  | 34.8173 | 81.54    | -1.2277  | 5.00E-05 | 0.00170056 |
| NM_016529.4    | 51761       | ATP8A2    | 5006  | 4.69777 | 1.86093  | 1.33595  | 5.00E-05 | 0.00170056 |
| NM_031457.1    | 83661       | MS4A8B    | 1353  | 15.5796 | 37.2902  | -1.25914 | 5.00E-05 | 0.00170056 |
| NM_031421.2    | 83538       | TTC25     | 2078  | 6.28726 | 22.0755  | -1.81195 | 5.00E-05 | 0.00170056 |
| NM_173554.2    | 219621      | C10orf107 | 1252  | 16.1576 | 36.9883  | -1.19485 | 5.00E-05 | 0.00170056 |
| NM_000782.4    | 1591        | CYP24A1   | 3266  | 2.89167 | 17.0522  | -2.55998 | 5.00E-05 | 0.00170056 |
| NM_017617.3    | 4851        | NOTCH1    | 9295  | 8.52912 | 3.65149  | 1.22391  | 5.00E-05 | 0.00170056 |
| NM_004344.1    | 1069        | CETN2     | 1080  | 73.5583 | 170.124  | -1.20963 | 5.00E-05 | 0.00170056 |
| NM_004826.2    | 9427        | ECEL1     | 2859  | 1.96723 | 0.30407  | 2.69369  | 5.00E-05 | 0.00170056 |
| NM_001029996.3 | 200373      | PCDP1     | 2968  | 6.57611 | 15.4191  | -1.22941 | 5.00E-05 | 0.00170056 |
| NM_001008226.1 | 283726      | FAM154B   | 3131  | 13.4542 | 41.0976  | -1.611   | 5.00E-05 | 0.00170056 |
| NM_004599.2    | 6721        | SREBF2    | 4306  | 20.4238 | 8.96612  | 1.18769  | 5.00E-05 | 0.00170056 |
| NM_006072.4    | 10344       | CCL26     | 562   | 91.7771 | 1.47311  | 5.9612   | 5.00E-05 | 0.00170056 |
| NM_016084.4    | 51655       | RASD1     | 1748  | 18.2422 | 1.84107  | 3.30867  | 5.00E-05 | 0.00170056 |
| NM_003277.3    | 7122        | CLDN5     | 1702  | 15.9801 | 6.1278   | 1.38284  | 5.00E-05 | 0.00170056 |
| NM_000732.4    | 915         | CD3D      | 741   | 15.1372 | 39.5828  | -1.38678 | 5.00E-05 | 0.00170056 |
| XM_001715090.3 | 144535      | C12orf55  | 5721  | 7.68912 | 16.3407  | -1.08758 | 5.00E-05 | 0.00170056 |
| NM_153610.3    | 202333      | CMYA5     | 12892 | 13.9632 | 7.07886  | 0.980043 | 5.00E-05 | 0.00170056 |



|                   |              |               |       |          |          |           |          |            |
|-------------------|--------------|---------------|-------|----------|----------|-----------|----------|------------|
| NM_018690.2       | 55911        | APOBR         | 3733  | 5.62036  | 2.21831  | 1.3412    | 5.00E-05 | 0.00170056 |
| NM_004666.2       | 8876         | VNN1          | 3844  | 1.11416  | 5.40109  | -2.27729  | 5.00E-05 | 0.00170056 |
| NM_002084.3       | 2878         | GPX3          | 1761  | 49.7881  | 18.9579  | 1.393     | 5.00E-05 | 0.00170056 |
| NM_015714.3       | 50486        | GOS2          | 963   | 16.3631  | 3.93563  | 2.05578   | 5.00E-05 | 0.00170056 |
| NM_017662.4       | 140803       | TRPM6         | 8425  | 3.13642  | 0.934859 | 1.7463    | 5.00E-05 | 0.00170056 |
| NM_001848.2       | 1291         | COL6A1        | 4225  | 75.3867  | 23.3507  | 1.69084   | 5.00E-05 | 0.00170056 |
| NM_007028.3       | 11074        | TRIM31        | 2027  | 0.241365 | 2.91783  | -3.59561  | 5.00E-05 | 0.00170056 |
| NM_007050.5       | 11122        | PTPRT         | 12637 | 0.840909 | 3.37236  | -2.00374  | 5.00E-05 | 0.00170056 |
| NM_138433.3       | 113730       | KLHDC7B       | 2991  | 0.677811 | 3.75932  | -2.47152  | 5.00E-05 | 0.00170056 |
| NM_001964.2       | 1958         | EGR1          | 3136  | 73.3271  | 7.03404  | 3.38192   | 5.00E-05 | 0.00170056 |
| NM_004233.3       | 9308         | CD83          | 2478  | 16.9528  | 6.92537  | 1.29156   | 5.00E-05 | 0.00170056 |
| NM_021979.3       | 3306         | HSPA2         | 2770  | 13.7769  | 4.93047  | 1.48245   | 5.00E-05 | 0.00170056 |
| NM_172239.4       | 254958       | REXO1L1       | 7032  | 3.62701  | 13.632   | -1.91015  | 5.00E-05 | 0.00170056 |
| NM_001432.2       | 2069         | EREG          | 4628  | 6.58287  | 0.215076 | 4.9358    | 5.00E-05 | 0.00170056 |
| NM_032269.5       | 84229        | CCDC135       | 2911  | 2.35336  | 6.64506  | -1.49756  | 5.00E-05 | 0.00170056 |
| NM_002416.1       | 4283         | CXCL9         | 2545  | 2.33524  | 59.1654  | -4.66311  | 5.00E-05 | 0.00170056 |
| NM_002053.2       | 2633         | GBP1          | 3050  | 26.3046  | 107.536  | -2.03143  | 5.00E-05 | 0.00170056 |
| NM_016583.3       | 51297        | PLUNC         | 1023  | 224.289  | 1406.36  | -2.64854  | 5.00E-05 | 0.00170056 |
| NM_145235.3       | 92565        | FANK1         | 1296  | 13.2293  | 37.0661  | -1.48637  | 5.00E-05 | 0.00170056 |
| NM_198320.3       | 1368         | CPM           | 6655  | 8.65585  | 4.04036  | 1.09919   | 5.00E-05 | 0.00170056 |
| NM_022068.2       | 63895        | FAM38B        | 9713  | 7.05458  | 2.73723  | 1.36584   | 5.00E-05 | 0.00170056 |
| NM_001369.2       | 1767         | DNAH5         | 15573 | 14.6696  | 34.1222  | -1.21788  | 5.00E-05 | 0.00170056 |
| NM_000435.2       | 4854         | NOTCH3        | 8071  | 11.359   | 4.95906  | 1.1957    | 5.00E-05 | 0.00170056 |
| NM_033255.2       | 94240        | EPST1         | 1508  | 19.9307  | 55.2258  | -1.47035  | 5.00E-05 | 0.00170056 |
| NM_145016.3       | 219970       | GLYATL2       | 1380  | 1.8942   | 10.1025  | -2.41505  | 5.00E-05 | 0.00170056 |
| NM_024787.2       | 79845        | RNF122        | 1868  | 9.51535  | 2.85743  | 1.73554   | 5.00E-05 | 0.00170056 |
| NM_017631.5       | 55601        | DDX60         | 6073  | 17.7018  | 42.8584  | -1.27568  | 5.00E-05 | 0.00170056 |
| NM_016232.4       | 9173         | IL1RL1        | 2058  | 21.8276  | 4.78325  | 2.19009   | 5.00E-05 | 0.00170056 |
| NM_197965.2       | 345274       | SLC10A6       | 1502  | 5.36734  | 1.21404  | 2.14438   | 5.00E-05 | 0.00170056 |
| NM_001102608.1    | 131873       | COL6A6        | 8470  | 6.18578  | 0.765362 | 3.01474   | 5.00E-05 | 0.00170056 |
| NM_004418.3       | 1844         | DUSP2         | 1685  | 13.1242  | 4.18248  | 1.6498    | 5.00E-05 | 0.00170056 |
| NM_181643.4       | 128344       | C1orf88       | 2346  | 18.504   | 49.9486  | -1.43261  | 5.00E-05 | 0.00170056 |
| NM_173081.3       | 219681       | ARMC3         | 2808  | 14.6867  | 36.9864  | -1.33249  | 5.00E-05 | 0.00170056 |
| NM_006674.3       | 10866        | HCP5          | 2539  | 25.0226  | 45.6173  | -0.866352 | 5.00E-05 | 0.00170056 |
| NM_002923.3       | 5997         | RGS2          | 1350  | 282.433  | 49.8778  | 2.50144   | 5.00E-05 | 0.00170056 |
| NM_000632.3       | 3684         | ITGAM         | 4742  | 23.0795  | 4.87594  | 2.24286   | 5.00E-05 | 0.00170056 |
| NM_003810.3       | 8743         | TNFSF10       | 1953  | 79.7278  | 176.591  | -1.14726  | 5.00E-05 | 0.00170056 |
| ENST00000544591.1 | ENSG00000256 | RP11-291B21.2 | 868   | 0.79541  | 9.04403  | -3.50719  | 5.00E-05 | 0.00170056 |
| NM_033050.4       | 56670        | SUCNR1        | 1650  | 12.2573  | 1.10843  | 3.46706   | 5.00E-05 | 0.00170056 |
| NM_001134486.2    | 115362       | GBP5          | 3944  | 2.55857  | 20.6343  | -3.01164  | 5.00E-05 | 0.00170056 |
| NM_000399.3       | 1959         | EGR2          | 2979  | 11.0657  | 1.38323  | 2.99998   | 5.00E-05 | 0.00170056 |
| NM_000636.2       | 6648         | SOD2          | 1593  | 76.6581  | 184.076  | -1.26379  | 5.00E-05 | 0.00170056 |
| TCONS_00111412    | XLOC_009731  | -             | 2716  | 0.808264 | 4.50001  | -2.47703  | 5.00E-05 | 0.00170056 |
| NM_080860.2       | 89765        | RSPH1         | 1367  | 24.2134  | 71.1785  | -1.55564  | 5.00E-05 | 0.00170056 |
| TCONS_00311623    | XLOC_026432  | -             | 2466  | 3.2772   | 0.237297 | 3.7877    | 5.00E-05 | 0.00170056 |
| NM_145244.3       | 115265       | DDIT4L        | 2634  | 3.93055  | 14.2127  | -1.85438  | 5.00E-05 | 0.00170056 |
| NM_001127595.1    | 2214         | FCGR3A        | 2155  | 14.5644  | 65.3784  | -2.16637  | 5.00E-05 | 0.00170056 |
| NM_001100388.1    | 399949       | C11orf88      | 714   | 23.0691  | 68.9128  | -1.57881  | 5.00E-05 | 0.00170056 |
| NM_177980.2       | 60437        | CDH26         | 3193  | 59.9684  | 7.08681  | 3.08099   | 5.00E-05 | 0.00170056 |
| NM_022093.1       | 63923        | TNN           | 5008  | 0.688977 | 2.43129  | -1.81919  | 5.00E-05 | 0.00170056 |
| NM_152721.5       | 220164       | DOK6          | 8897  | 4.35317  | 1.74063  | 1.32246   | 5.00E-05 | 0.00170056 |
| NM_031310.1       | 83483        | PLVAP         | 2276  | 34.2818  | 11.5337  | 1.57159   | 5.00E-05 | 0.00170056 |
| NM_020530.4       | 5008         | OSM           | 1854  | 11.2806  | 0.386969 | 4.86548   | 5.00E-05 | 0.00170056 |
| NM_004417.3       | 1843         | DUSP1         | 2024  | 356.027  | 53.0246  | 2.74725   | 5.00E-05 | 0.00170056 |

|                |             |           |       |          |          |          |          |            |
|----------------|-------------|-----------|-------|----------|----------|----------|----------|------------|
| NM_004120.3    | 2634        | GBP2      | 2595  | 37.2669  | 102.505  | -1.45972 | 5.00E-05 | 0.00170056 |
| NM_001736.3    | 728         | C5AR1     | 2342  | 15.3561  | 2.96619  | 2.37212  | 5.00E-05 | 0.00170056 |
| NM_005688.2    | 10057       | ABCC5     | 5845  | 17.1981  | 4.82494  | 1.83367  | 5.00E-05 | 0.00170056 |
| NM_001062.3    | 6947        | TCN1      | 1567  | 227.086  | 59.922   | 1.92208  | 5.00E-05 | 0.00170056 |
| NM_172337.1    | 5015        | OTX2      | 2069  | 11.9891  | 3.37485  | 1.82883  | 5.00E-05 | 0.00170056 |
| NM_145010.2    | 219670      | ENKUR     | 3318  | 7.58547  | 23.3226  | -1.62042 | 5.00E-05 | 0.00170056 |
| NM_014631.2    | 9644        | SH3PXD2A  | 11247 | 18.3254  | 7.90235  | 1.21349  | 5.00E-05 | 0.00170056 |
| NM_138456.3    | 116071      | BATF2     | 2140  | 1.11191  | 5.63184  | -2.34057 | 5.00E-05 | 0.00170056 |
| NM_002652.2    | 5304        | PIP       | 576   | 1.43896  | 16.7682  | -3.54263 | 5.00E-05 | 0.00170056 |
| NM_001165257.1 | 29106       | SCG3      | 3257  | 0.290849 | 1.63918  | -2.49463 | 5.00E-05 | 0.00170056 |
| NM_002351.4    | 4068        | SH2D1A    | 2517  | 4.80127  | 11.0563  | -1.20338 | 5.00E-05 | 0.00170056 |
| NM_001140.3    | 246         | ALOX15    | 2684  | 641.058  | 62.3893  | 3.36108  | 5.00E-05 | 0.00170056 |
| NM_002119.3    | 3111        | HLA-DOA   | 3485  | 18.4497  | 38.7255  | -1.06968 | 5.00E-05 | 0.00170056 |
| 3505           | 3505        | -         | 1188  | 11.741   | 2.29208  | 2.35683  | 5.00E-05 | 0.00170056 |
| NM_015576.1    | 26059       | ERC2      | 6138  | 0.387774 | 1.448    | -1.90077 | 5.00E-05 | 0.00170056 |
| NM_022481.5    | 64411       | ARAP3     | 5262  | 4.55992  | 1.69683  | 1.42617  | 5.00E-05 | 0.00170056 |
| NM_015991.2    | 712         | C1QA      | 1098  | 57.5953  | 144.189  | -1.32394 | 5.00E-05 | 0.00170056 |
| NM_173157.2    | 3164        | NR4A1     | 2529  | 48.3937  | 2.01517  | 4.58585  | 5.00E-05 | 0.00170056 |
| NM_003737.2    | 8642        | DCHS1     | 10756 | 6.41969  | 3.13831  | 1.03252  | 5.00E-05 | 0.00170056 |
| NM_000572.2    | 3586        | IL10      | 1629  | 8.45793  | 1.65233  | 2.3558   | 5.00E-05 | 0.00170056 |
| NM_000887.3    | 3687        | ITGAX     | 4649  | 9.69334  | 3.94863  | 1.29564  | 5.00E-05 | 0.00170056 |
| NM_001195037.2 | 345930      | ECT2L     | 4343  | 7.36833  | 20.6472  | -1.48654 | 5.00E-05 | 0.00170056 |
| NM_003856.2    | 9173        | IL1RL1    | 2508  | 34.9321  | 3.58984  | 3.28256  | 5.00E-05 | 0.00170056 |
| NM_152447.3    | 145581      | LRFN5     | 3732  | 1.26236  | 3.61184  | -1.51661 | 5.00E-05 | 0.00170056 |
| NM_152632.3    | 170063      | CXorf22   | 3613  | 7.50052  | 16.8435  | -1.16713 | 5.00E-05 | 0.00170056 |
| NM_002001.2    | 2205        | FCER1A    | 1165  | 35.7487  | 12.6149  | 1.50276  | 5.00E-05 | 0.00170056 |
| NM_002575.2    | 5055        | SERPINB2  | 1908  | 17.0978  | 2.74995  | 2.63633  | 5.00E-05 | 0.00170056 |
| TCONS_00053150 | XLOC_004440 | -         | 13299 | 2.35416  | 0.890577 | 1.4024   | 5.00E-05 | 0.00170056 |
| NM_006798.2    | 10941       | UGT2A1    | 2602  | 117.118  | 19.8036  | 2.56413  | 5.00E-05 | 0.00170056 |
| NM_014601.3    | 30846       | EHD2      | 3584  | 11.4044  | 4.82548  | 1.24085  | 5.00E-05 | 0.00170056 |
| NM_130782.2    | 64407       | RGS18     | 2145  | 27.0136  | 12.1568  | 1.15192  | 5.00E-05 | 0.00170056 |
| NM_003278.2    | 7123        | CLEC3B    | 852   | 23.7274  | 93.9382  | -1.98516 | 5.00E-05 | 0.00170056 |
| NM_178329.2    | 1232        | CCR3      | 1717  | 11.2616  | 0.568848 | 4.30722  | 5.00E-05 | 0.00170056 |
| NM_198469.2    | 254956      | MORN5     | 705   | 13.9086  | 43.3873  | -1.64129 | 5.00E-05 | 0.00170056 |
| NM_014157.3    | 29070       | CCDC113   | 5272  | 7.57459  | 22.0149  | -1.53924 | 5.00E-05 | 0.00170056 |
| NM_001927.3    | 1674        | DES       | 2248  | 0.408419 | 19.4006  | -5.5699  | 5.00E-05 | 0.00170056 |
| TCONS_00114410 | XLOC_009730 | -         | 4688  | 3.40649  | 16.0291  | -2.23434 | 5.00E-05 | 0.00170056 |
| NM_005024.1    | 5273        | SERPINB10 | 1194  | 14.3433  | 1.07376  | 3.73963  | 5.00E-05 | 0.00170056 |
| NM_000094.3    | 1294        | COL7A1    | 9169  | 9.06823  | 3.6782   | 1.30182  | 5.00E-05 | 0.00170056 |
| NM_001849.3    | 1292        | COL6A2    | 3439  | 84.7591  | 24.0917  | 1.81483  | 5.00E-05 | 0.00170056 |
| NM_003661.3    | 8542        | APOL1     | 2863  | 18.5379  | 42.9307  | -1.21153 | 5.00E-05 | 0.00170056 |
| NM_030955.2    | 81792       | ADAMTS12  | 4955  | 7.86652  | 2.4124   | 1.70526  | 5.00E-05 | 0.00170056 |
| NM_014442.2    | 27181       | SIGLEC8   | 2949  | 6.0318   | 1.02106  | 2.56252  | 5.00E-05 | 0.00170056 |
| NM_000625.4    | 4843        | NOS2      | 4206  | 138.964  | 21.9066  | 2.66527  | 5.00E-05 | 0.00170056 |
| NM_003695.2    | 8581        | LY6D      | 802   | 1.71025  | 8.65824  | -2.33987 | 5.00E-05 | 0.00170056 |
| NM_005613.5    | 5999        | RGS4      | 3371  | 43.9162  | 4.64344  | 3.24149  | 5.00E-05 | 0.00170056 |
| NM_001710.5    | 629         | CFB       | 2627  | 24.1034  | 173.38   | -2.84662 | 5.00E-05 | 0.00170056 |
| NM_004036.3    | 109         | ADCY3     | 4397  | 41.1765  | 11.4949  | 1.84083  | 5.00E-05 | 0.00170056 |
| NM_003617.3    | 8490        | RGS5      | 5927  | 127.864  | 36.3051  | 1.81637  | 5.00E-05 | 0.00170056 |
| NM_006186.3    | 4929        | NR4A2     | 3531  | 36.2997  | 3.97275  | 3.19175  | 5.00E-05 | 0.00170056 |
| NM_002291.2    | 3912        | LAMB1     | 5846  | 80.7467  | 31.3327  | 1.36573  | 5.00E-05 | 0.00170056 |
| NM_015896.2    | 51364       | ZMYND10   | 1773  | 12.5612  | 32.0479  | -1.35125 | 5.00E-05 | 0.00170056 |
| NM_002462.3    | 4599        | MX1       | 2966  | 17.4412  | 42.115   | -1.27184 | 5.00E-05 | 0.00170056 |
| NM_003551.2    | 8382        | NME5      | 1226  | 15.7707  | 41.4618  | -1.39454 | 5.00E-05 | 0.00170056 |

|                |             |           |       |          |          |          |          |            |
|----------------|-------------|-----------|-------|----------|----------|----------|----------|------------|
| NM_000518.4    | 3043        | HBB       | 626   | 349.482  | 77.3997  | 2.17482  | 5.00E-05 | 0.00170056 |
| NM_005099.4    | 9507        | ADAMTS4   | 4332  | 7.26144  | 0.992717 | 2.8708   | 5.00E-05 | 0.00170056 |
| NM_052929.1    | 114827      | FHAD1     | 5090  | 7.22349  | 15.6616  | -1.11646 | 5.00E-05 | 0.00170056 |
| NM_139164.1    | 134429      | STARD4    | 2264  | 36.0735  | 10.6328  | 1.76242  | 5.00E-05 | 0.00170056 |
| NM_032372.4    | 84332       | DYDC2     | 1842  | 3.08081  | 10.6912  | -1.79505 | 5.00E-05 | 0.00170056 |
| NM_021732.2    | 60370       | AVPI1     | 1392  | 16.5954  | 5.55401  | 1.57918  | 5.00E-05 | 0.00170056 |
| NM_002309.3    | 3976        | LIF       | 3919  | 10.3753  | 2.5545   | 2.02205  | 5.00E-05 | 0.00170056 |
| NM_001080420.1 | 85358       | SHANK3    | 7145  | 3.39308  | 1.27257  | 1.41485  | 5.00E-05 | 0.00170056 |
| NM_003890.2    | 8857        | FCGBP     | 16390 | 5.4615   | 2.30969  | 1.2416   | 5.00E-05 | 0.00170056 |
| NM_000450.2    | 6401        | SELE      | 3875  | 15.0178  | 3.73904  | 2.00594  | 5.00E-05 | 0.00170056 |
| NM_002126.4    | 3131        | HLF       | 5599  | 27.5438  | 12.6699  | 1.12033  | 5.00E-05 | 0.00170056 |
| NM_012472.3    | 23639       | LRRC6     | 1582  | 7.53666  | 18.2451  | -1.27551 | 5.00E-05 | 0.00170056 |
| NM_001901.2    | 1490        | CTGF      | 2344  | 245.499  | 96.9859  | 1.33987  | 5.00E-05 | 0.00170056 |
| NM_198505.2    | 344905      | ATP13A5   | 3657  | 7.9423   | 1.33878  | 2.56863  | 5.00E-05 | 0.00170056 |
| NM_018284.2    | 2635        | GBP3      | 3040  | 23.2895  | 55.7273  | -1.2587  | 5.00E-05 | 0.00170056 |
| NM_001511.2    | 2919        | CXCL1     | 1109  | 39.4191  | 88.6328  | -1.16895 | 5.00E-05 | 0.00170056 |
| NM_199289.1    | 341676      | NEK5      | 2912  | 5.07284  | 13.2112  | -1.3809  | 5.00E-05 | 0.00170056 |
| NM_203418.1    | 1827        | RCAN1     | 2408  | 52.0108  | 12.997   | 2.00064  | 5.00E-05 | 0.00170056 |
| NM_001276.2    | 1116        | CHI3L1    | 1837  | 0.357531 | 2.65246  | -2.89119 | 5.00E-05 | 0.00170056 |
| NM_182519.2    | 149954      | C20orf186 | 2174  | 215.456  | 0.743645 | 8.17857  | 5.00E-05 | 0.00170056 |
| NM_001999.3    | 2201        | FBN2      | 10724 | 3.52409  | 1.21924  | 1.53126  | 5.00E-05 | 0.00170056 |
| NM_033049.3    | 56667       | MUC13     | 2876  | 0.770846 | 13.5798  | -4.13887 | 5.00E-05 | 0.00170056 |
| NM_052942.3    | 115362      | GBP5      | 4052  | 9.56774  | 63.3245  | -2.72651 | 5.00E-05 | 0.00170056 |
| TCONS_00156537 | XLOC_014786 | -         | 2200  | 1.41952  | 6.52565  | -2.20072 | 5.00E-05 | 0.00170056 |
| NM_004419.3    | 1847        | DUSP5     | 2528  | 51.4685  | 9.9697   | 2.36807  | 5.00E-05 | 0.00170056 |
| NM_000774.3    | 1572        | CYP2F1    | 1826  | 2.28882  | 8.99271  | -1.97415 | 5.00E-05 | 0.00170056 |
| NM_001127496.1 | 81848       | SPRY4     | 4941  | 4.25907  | 1.3965   | 1.60872  | 5.00E-05 | 0.00170056 |
| NM_000096.3    | 1356        | CP        | 4666  | 106.213  | 424.023  | -1.99718 | 5.00E-05 | 0.00170056 |
| NM_144687.2    | 91662       | NLRP12    | 3871  | 2.62713  | 0.384799 | 2.77131  | 5.00E-05 | 0.00170056 |
| NM_002855.4    | 5818        | PVRL1     | 5481  | 6.69305  | 2.78372  | 1.26565  | 5.00E-05 | 0.00170056 |
| NM_006144.3    | 3001        | GZMA      | 896   | 18.3969  | 44.9368  | -1.28843 | 5.00E-05 | 0.00170056 |
| NM_000348.3    | 6716        | SRD5A2    | 2445  | 4.02154  | 12.1995  | -1.601   | 5.00E-05 | 0.00170056 |
| NM_004573.2    | 5330        | PLCB2     | 4677  | 17.4669  | 5.73761  | 1.6061   | 5.00E-05 | 0.00170056 |
| NM_001007097.1 | 4915        | NTRK2     | 7111  | 41.1655  | 16.9782  | 1.27776  | 5.00E-05 | 0.00170056 |
| NM_002991.2    | 6369        | CCL24     | 360   | 102.268  | 4.98571  | 4.35841  | 5.00E-05 | 0.00170056 |
| NM_006931.2    | 6515        | SLC2A3    | 3938  | 64.4682  | 11.5063  | 2.48616  | 5.00E-05 | 0.00170056 |
| NM_001856.3    | 1307        | COL16A1   | 5584  | 29.3916  | 11.8784  | 1.30707  | 5.00E-05 | 0.00170056 |
| NM_152377.2    | 127795      | C1orf87   | 2028  | 5.88121  | 16.2069  | -1.46242 | 5.00E-05 | 0.00170056 |
| NM_032291.2    | 84251       | SGIP1     | 4694  | 6.60444  | 2.73182  | 1.27358  | 5.00E-05 | 0.00170056 |
| NM_001370.1    | 1768        | DNAH6     | 12795 | 8.36713  | 16.8756  | -1.01214 | 5.00E-05 | 0.00170056 |
| NM_022136.3    | 64092       | SAMSN1    | 1888  | 74.1493  | 34.2492  | 1.11436  | 0.0001   | 0.00312189 |
| NM_153614.2    | 374407      | DNAJB13   | 1875  | 2.36469  | 6.78658  | -1.52103 | 0.0001   | 0.00312189 |
| TCONS_00075645 | XLOC_006291 | -         | 286   | 0        | 3.25314  | #NAME?   | 0.0001   | 0.00312189 |
| NM_025258.2    | 80737       | C6orf27   | 2914  | 0.893045 | 2.94588  | -1.72189 | 0.0001   | 0.00312189 |
| NM_021958.3    | 3142        | HLX       | 2279  | 4.13149  | 1.32048  | 1.6456   | 0.0001   | 0.00312189 |
| NM_003877.3    | 8835        | SOCS2     | 2210  | 24.7189  | 12.0339  | 1.03851  | 0.0001   | 0.00312189 |
| NM_002104.2    | 3003        | GZMK      | 1045  | 11.455   | 31.9186  | -1.47842 | 0.0001   | 0.00312189 |
| NM_002241.4    | 3766        | KCNJ10    | 5306  | 0.233605 | 0.891323 | -1.93187 | 0.0001   | 0.00312189 |
| NM_000962.2    | 5742        | PTGS1     | 5093  | 8.82318  | 3.46615  | 1.34797  | 0.0001   | 0.00312189 |
| NM_080657.4    | 91543       | RSAD2     | 3512  | 4.52626  | 10.3793  | -1.19732 | 0.0001   | 0.00312189 |
| NM_152680.2    | 201799      | TMEM154   | 3216  | 34.4422  | 17.5873  | 0.969645 | 0.0001   | 0.00312189 |
| NM_032576.4    | 84663       | CYorf15B  | 3315  | 21.5738  | 7.31827  | 1.55971  | 0.0001   | 0.00312189 |
| NM_144644.2    | 132851      | SPATA4    | 1233  | 1.66859  | 5.94224  | -1.83238 | 0.0001   | 0.00312189 |
| NM_001079906.1 | 55422       | ZNF331    | 4131  | 21.6414  | 7.4639   | 1.53579  | 0.0001   | 0.00312189 |

|                |             |           |       |          |          |           |         |            |
|----------------|-------------|-----------|-------|----------|----------|-----------|---------|------------|
| NM_004525.2    | 4036        | LRP2      | 15735 | 15.161   | 7.16138  | 1.08205   | 0.0001  | 0.00312189 |
| NM_014395.2    | 27071       | DAPP1     | 2938  | 18.7676  | 35.8757  | -0.934765 | 0.0001  | 0.00312189 |
| NM_001039763.3 | 642987      | TMEM232   | 3193  | 9.65451  | 21.0966  | -1.12773  | 0.0001  | 0.00312189 |
| NM_007199.2    | 11213       | IRAK3     | 8344  | 13.3031  | 25.5484  | -0.941472 | 0.0001  | 0.00312189 |
| NM_001098816.2 | 26011       | ODZ4      | 13548 | 3.47257  | 1.70121  | 1.02944   | 0.0001  | 0.00312189 |
| NM_018986.3    | 54436       | SH3TC1    | 4260  | 7.47804  | 3.29096  | 1.18415   | 0.0001  | 0.00312189 |
| NM_001128431.2 | 23516       | SLC39A14  | 4692  | 13.3851  | 6.51319  | 1.03919   | 0.0001  | 0.00312189 |
| NM_181807.3    | 341019      | DCDC1     | 1742  | 4.88631  | 12.0338  | -1.30027  | 0.0001  | 0.00312189 |
| NM_000093.3    | 1289        | COL5A1    | 8439  | 19.2006  | 9.28306  | 1.04848   | 0.0001  | 0.00312189 |
| NM_018384.4    | 55340       | GIMAP5    | 1877  | 23.1139  | 54.3897  | -1.23457  | 0.0001  | 0.00312189 |
| NM_001795.3    | 1003        | CDH5      | 4128  | 14.6776  | 7.34701  | 0.998385  | 0.0001  | 0.00312189 |
| NM_012334.2    | 4651        | MYO10     | 11430 | 12.9188  | 7.10137  | 0.863304  | 0.0001  | 0.00312189 |
| TCONS_00081893 | XLOC_006697 | -         | 5183  | 1.2034   | 3.09154  | -1.36122  | 0.0001  | 0.00312189 |
| NM_173701.1    | 7453        | WARS      | 2660  | 24.6088  | 71.0735  | -1.53014  | 0.0001  | 0.00312189 |
| NM_001977.3    | 2028        | ENPEP     | 4995  | 27.8369  | 13.6196  | 1.03132   | 0.0001  | 0.00312189 |
| NM_001814.4    | 1075        | CTSC      | 1907  | 359.574  | 147.917  | 1.2815    | 0.0001  | 0.00312189 |
| NM_030641.3    | 80830       | APOL6     | 10139 | 29.2001  | 67.834   | -1.21604  | 0.0001  | 0.00312189 |
| NM_001085.4    | 12          | SERPINA3  | 1590  | 469.152  | 89.048   | 2.3974    | 0.0001  | 0.00312189 |
| NM_001206485.1 | 467         | ATF3      | 3172  | 15.2178  | 1.62813  | 3.22447   | 0.0001  | 0.00312189 |
| NM_014648.3    | 9666        | DZIP3     | 5542  | 20.1262  | 41.1229  | -1.03087  | 0.0001  | 0.00312189 |
| NM_024592.4    | 79644       | SRD5A3    | 4082  | 4.76951  | 10.7479  | -1.17214  | 0.0001  | 0.00312189 |
| NM_018215.3    | 55228       | PNMAL1    | 3696  | 1.99899  | 5.23848  | -1.38988  | 0.0001  | 0.00312189 |
| NM_019055.5    | 54538       | ROBO4     | 3837  | 3.5892   | 1.28779  | 1.47876   | 0.0001  | 0.00312189 |
| NM_003742.2    | 8647        | ABCB11    | 4775  | 1.19052  | 3.21867  | -1.43487  | 0.0001  | 0.00312189 |
| NM_001017424.2 | 3776        | KCNK2     | 3597  | 0.464832 | 2.32354  | -2.32154  | 0.0001  | 0.00312189 |
| NM_198491.1    | 339145      | FAM92B    | 1897  | 7.07712  | 16.2825  | -1.20209  | 0.0001  | 0.00312189 |
| NM_020733.1    | 57493       | HEG1      | 9156  | 54.613   | 20.8332  | 1.39036   | 0.0001  | 0.00312189 |
| NM_139244.4    | 134957      | STXBP5    | 9244  | 20.2077  | 9.86349  | 1.03474   | 0.0001  | 0.00312189 |
| NM_002986.2    | 6356        | CCL11     | 925   | 26.4263  | 10.2261  | 1.36972   | 0.0001  | 0.00312189 |
| NM_001097638.2 | 2524        | FUT2      | 3089  | 8.62966  | 18.942   | -1.13422  | 0.0001  | 0.00312189 |
| 3507           | 3507        | -         | 1486  | 135.167  | 322.04   | -1.25249  | 0.0001  | 0.00312189 |
| NM_173054.2    | 5649        | RELN      | 11565 | 0.71523  | 0.083582 | 3.09714   | 0.0001  | 0.00312189 |
| NM_022168.2    | 64135       | IFIH1     | 3421  | 13.7003  | 26.406   | -0.946664 | 0.0001  | 0.00312189 |
| NM_012261.3    | 24141       | C20orf103 | 2042  | 88.4785  | 44.0897  | 1.00488   | 0.00015 | 0.00437065 |
| NM_003480.2    | 8076        | MFAP5     | 2882  | 0.301555 | 1.99581  | -2.72648  | 0.00015 | 0.00437065 |
| NM_031866.2    | 8325        | FZD8      | 3186  | 2.55128  | 6.02128  | -1.23885  | 0.00015 | 0.00437065 |
| NM_001854.3    | 1301        | COL11A1   | 7291  | 6.26187  | 12.5191  | -0.99947  | 0.00015 | 0.00437065 |
| NM_005581.3    | 4059        | BCAM      | 2431  | 22.7947  | 11.348   | 1.00626   | 0.00015 | 0.00437065 |
| NM_000265.4    | 653361      | NCF1      | 1398  | 13.3119  | 5.2146   | 1.35209   | 0.00015 | 0.00437065 |
| NM_002727.2    | 5552        | SRGN      | 1254  | 600.399  | 222.297  | 1.43343   | 0.00015 | 0.00437065 |
| NM_001039844.2 | 414149      | ACBD7     | 3370  | 1.42869  | 4.13044  | -1.5316   | 0.00015 | 0.00437065 |
| NM_001128178.1 | 4867        | NPHP1     | 2583  | 6.04621  | 17.4452  | -1.52873  | 0.00015 | 0.00437065 |
| NM_002546.3    | 4982        | TNFRSF11B | 2346  | 7.52949  | 3.24711  | 1.2134    | 0.00015 | 0.00437065 |
| NM_080390.3    | 140597      | TCEAL2    | 1101  | 1.34963  | 4.66188  | -1.78835  | 0.00015 | 0.00437065 |
| TCONS_00065152 | XLOC_005437 | -         | 2048  | 0.263389 | 1.53157  | -2.53974  | 0.00015 | 0.00437065 |
| NM_017839.4    | 54947       | LPCAT2    | 5388  | 20.1654  | 10.5208  | 0.93864   | 0.00015 | 0.00437065 |
| NM_007286.5    | 11346       | SYNPO     | 5397  | 16.123   | 7.93292  | 1.0232    | 0.00015 | 0.00437065 |
| NM_000851.3    | 2949        | GSTM5     | 1570  | 0.357057 | 2.35722  | -2.72286  | 0.00015 | 0.00437065 |
| NM_012194.2    | 25758       | C11orf41  | 11622 | 0.430519 | 1.21754  | -1.49981  | 0.00015 | 0.00437065 |
| NM_014058.3    | 28983       | TMPRSS11E | 2136  | 0.718762 | 2.63046  | -1.87173  | 0.00015 | 0.00437065 |
| NM_001199417.1 | 57636       | ARHGAP23  | 5906  | 8.18209  | 4.05461  | 1.01291   | 0.00015 | 0.00437065 |
| NM_001100917.1 | 144448      | TSPAN19   | 1020  | 6.99581  | 19.1058  | -1.44945  | 0.00015 | 0.00437065 |
| NM_144575.2    | 92291       | CAPN13    | 2682  | 41.2026  | 85.7017  | -1.05659  | 0.00015 | 0.00437065 |
| NM_003612.3    | 8482        | SEMA7A    | 3376  | 4.77337  | 1.35053  | 1.82148   | 0.00015 | 0.00437065 |

|                |             |          |       |          |          |           |         |            |
|----------------|-------------|----------|-------|----------|----------|-----------|---------|------------|
| NM_001124.1    | 133         | ADM      | 1449  | 21.7287  | 10.1365  | 1.10004   | 0.00015 | 0.00437065 |
| NM_015549.1    | 26030       | PLEKHG3  | 4400  | 7.27324  | 3.27511  | 1.15106   | 0.00015 | 0.00437065 |
| NM_001008784.2 | 344807      | CD200R1L | 1296  | 3.00135  | 0.275457 | 3.44571   | 0.00015 | 0.00437065 |
| NM_001201.2    | 651         | BMP3     | 5734  | 2.15607  | 5.3038   | -1.29862  | 0.00015 | 0.00437065 |
| NM_003373.3    | 7414        | VCL      | 5286  | 61.1001  | 31.2114  | 0.969102  | 0.00015 | 0.00437065 |
| NM_001263.3    | 1040        | CDS1     | 4538  | 14.0527  | 26.3871  | -0.90899  | 0.00015 | 0.00437065 |
| NM_003950.2    | 9002        | F2RL3    | 2731  | 1.55892  | 0.382255 | 2.02794   | 0.00015 | 0.00437065 |
| NM_145278.3    | 148823      | C1orf150 | 2626  | 3.94641  | 1.19912  | 1.71857   | 0.00015 | 0.00437065 |
| NM_019105.6    | 7148        | TNXB     | 13125 | 1.92248  | 0.876743 | 1.13274   | 0.00015 | 0.00437065 |
| NM_012385.2    | 26471       | NUPR1    | 858   | 25.1856  | 53.6217  | -1.09022  | 0.00015 | 0.00437065 |
| NM_001136528.1 | 5270        | SERPINE2 | 2256  | 17.7188  | 7.49434  | 1.24141   | 0.00015 | 0.00437065 |
| NM_005559.3    | 284217      | LAMA1    | 9657  | 2.7555   | 1.21228  | 1.18459   | 0.00015 | 0.00437065 |
| NM_018071.3    | 55701       | ARHGEF40 | 5458  | 11.5379  | 5.98936  | 0.945909  | 0.00015 | 0.00437065 |
| NM_001010854.1 | 145567      | TTC7B    | 3434  | 6.09314  | 2.66599  | 1.19252   | 0.00015 | 0.00437065 |
| NM_002728.4    | 5553        | PRG2     | 857   | 4.98496  | 0.739096 | 2.75375   | 0.00015 | 0.00437065 |
| NM_004104.4    | 2194        | FASN     | 8458  | 4.86973  | 2.42839  | 1.00384   | 0.00015 | 0.00437065 |
| NM_024694.3    | 79747       | C6orf103 | 5290  | 4.22462  | 8.82672  | -1.06306  | 0.00015 | 0.00437065 |
| 3502           | 3502        | -        | 1348  | 329.99   | 1054.44  | -1.67598  | 0.00015 | 0.00437065 |
| NM_001172779.1 | 151827      | LRRC34   | 1840  | 5.01262  | 13.5955  | -1.43949  | 0.00015 | 0.00437065 |
| NM_004445.3    | 2051        | EPHB6    | 4043  | 6.99876  | 2.8412   | 1.3006    | 0.00015 | 0.00437065 |
| NM_002631.2    | 5226        | PGD      | 1937  | 78.0959  | 42.3541  | 0.882745  | 0.00015 | 0.00437065 |
| NM_005420.2    | 6783        | SULT1E1  | 1780  | 5.87511  | 14.3799  | -1.29137  | 0.00015 | 0.00437065 |
| NM_002463.1    | 4600        | MX2      | 2961  | 7.79297  | 15.8927  | -1.02812  | 0.00015 | 0.00437065 |
| NM_152866.2    | 931         | MS4A1    | 3594  | 9.24624  | 20.5402  | -1.15151  | 0.0002  | 0.00554203 |
| NM_002737.2    | 5578        | PRKCA    | 8770  | 11.6082  | 6.43044  | 0.852151  | 0.0002  | 0.00554203 |
| NM_032865.5    | 84951       | TNS4     | 4072  | 6.5225   | 2.8342   | 1.20249   | 0.0002  | 0.00554203 |
| NM_002964.4    | 6279        | S100A8   | 523   | 44.1405  | 93.4571  | -1.0822   | 0.0002  | 0.00554203 |
| NM_001711.4    | 633         | BGN      | 2444  | 30.5053  | 15.6835  | 0.95981   | 0.0002  | 0.00554203 |
| NM_012190.2    | 10840       | ALDH1L1  | 3125  | 2.22124  | 5.54327  | -1.31937  | 0.0002  | 0.00554203 |
| NM_172369.3    | 714         | C1QC     | 1168  | 33.2844  | 65.5465  | -0.977671 | 0.0002  | 0.00554203 |
| NM_024764.2    | 79820       | CATSPERB | 3606  | 1.18819  | 3.31545  | -1.48044  | 0.0002  | 0.00554203 |
| NM_031271.3    | 56154       | TEX15    | 10112 | 0.869623 | 0.269336 | 1.69098   | 0.0002  | 0.00554203 |
| TCONS_00070847 | XLOC_005757 | -        | 1130  | 5.74113  | 1.67822  | 1.7744    | 0.0002  | 0.00554203 |
| NM_002048.2    | 2619        | GAS1     | 2828  | 30.6588  | 15.9476  | 0.942964  | 0.0002  | 0.00554203 |
| NM_032930.2    | 85016       | C11orf70 | 2198  | 8.8689   | 19.3708  | -1.12706  | 0.0002  | 0.00554203 |
| NM_000641.2    | 3589        | IL11     | 2354  | 1.87655  | 0.355199 | 2.40139   | 0.0002  | 0.00554203 |
| NM_004654.3    | 8287        | USP9Y    | 10040 | 18.879   | 6.94327  | 1.44309   | 0.0002  | 0.00554203 |
| NM_001004330.2 | 440107      | PLEKHG7  | 3267  | 8.36482  | 16.5785  | -0.986905 | 0.0002  | 0.00554203 |
| NM_002116.7    | 3105        | HLA-A    | 1611  | 247.044  | 560.15   | -1.18104  | 0.0002  | 0.00554203 |
| NM_002228.3    | 3725        | JUN      | 3323  | 61.3097  | 29.5382  | 1.05353   | 0.0002  | 0.00554203 |
| NM_003005.3    | 6403        | SELP     | 3172  | 28.0713  | 14.3735  | 0.965682  | 0.0002  | 0.00554203 |
| NM_138788.3    | 120224      | TMEM45B  | 2207  | 7.38134  | 15.4231  | -1.06314  | 0.0002  | 0.00554203 |
| NM_178499.3    | 160777      | CCDC60   | 2450  | 4.11661  | 9.87892  | -1.2629   | 0.0002  | 0.00554203 |
| NM_000198.3    | 3284        | HSD3B2   | 1710  | 1.798    | 0.270367 | 2.7334    | 0.0002  | 0.00554203 |
| NM_014840.2    | 9891        | NUAK1    | 6821  | 20.8067  | 11.398   | 0.868263  | 0.0002  | 0.00554203 |
| NM_020872.1    | 5067        | CNTN3    | 4997  | 4.69864  | 1.99485  | 1.23597   | 0.0002  | 0.00554203 |
| NM_148919.3    | 5696        | PSMB8    | 1116  | 47.4499  | 91.0255  | -0.939864 | 0.0002  | 0.00554203 |
| NM_002198.2    | 3659        | IRF1     | 3554  | 12.4595  | 29.911   | -1.26343  | 0.0002  | 0.00554203 |
| NM_022785.3    | 64800       | EFCAB6   | 4929  | 3.73487  | 7.54714  | -1.01487  | 0.0002  | 0.00554203 |
| NM_015419.3    | 25878       | MXRA5    | 9795  | 36.0294  | 18.1292  | 0.990864  | 0.0002  | 0.00554203 |
| NM_004133.4    | 3174        | HNF4G    | 4101  | 1.70434  | 4.132    | -1.27763  | 0.0002  | 0.00554203 |
| NM_006745.3    | 6307        | SC4MOL   | 2139  | 34.7417  | 17.2295  | 1.01179   | 0.0002  | 0.00554203 |
| NM_025057.2    | 80127       | C14orf45 | 3106  | 10.2278  | 24.2225  | -1.24385  | 0.0002  | 0.00554203 |
| NM_016953.3    | 50940       | PDE11A   | 9278  | 2.60291  | 8.35974  | -1.68334  | 0.0002  | 0.00554203 |

|                   |              |           |       |          |          |           |         |            |
|-------------------|--------------|-----------|-------|----------|----------|-----------|---------|------------|
| NM_139072.3       | 92737        | DNER      | 3272  | 0.930212 | 3.06025  | -1.71802  | 0.0002  | 0.00554203 |
| NM_001098212.1    | 3269         | HRH1      | 4278  | 8.42974  | 2.13955  | 1.97818   | 0.0002  | 0.00554203 |
| NM_004747.3       | 9231         | DLG5      | 7479  | 17.2647  | 9.07877  | 0.927255  | 0.0002  | 0.00554203 |
| NM_001037763.2    | 340267       | COL28A1   | 3515  | 2.24992  | 5.41776  | -1.26782  | 0.0002  | 0.00554203 |
| NM_145027.4       | 221458       | KIF6      | 3972  | 1.55591  | 3.86678  | -1.31338  | 0.0002  | 0.00554203 |
| NM_006142.3       | 2810         | SFN       | 1315  | 29.6634  | 13.6089  | 1.12414   | 0.00025 | 0.00665625 |
| NM_030622.6       | 29785        | CYP2S1    | 2621  | 8.40721  | 3.41187  | 1.30106   | 0.00025 | 0.00665625 |
| NM_001197249.1    | 11118        | BTN3A2    | 3714  | 6.83979  | 19.8425  | -1.53657  | 0.00025 | 0.00665625 |
| NM_001098484.2    | 8671         | SLC4A4    | 7693  | 7.56207  | 15.3342  | -1.0199   | 0.00025 | 0.00665625 |
| NM_006887.4       | 678          | ZFP36L2   | 3693  | 65.4823  | 32.7293  | 1.00052   | 0.00025 | 0.00665625 |
| NM_007015.2       | 11061        | LECT1     | 1447  | 7.87089  | 0.481716 | 4.03027   | 0.00025 | 0.00665625 |
| NM_003129.3       | 6713         | SQLE      | 2989  | 26.5717  | 14.253   | 0.898623  | 0.00025 | 0.00665625 |
| NM_004200.2       | 9066         | SYT7      | 4532  | 0.726219 | 2.02056  | -1.47628  | 0.00025 | 0.00665625 |
| NM_015515.3       | 25984        | KRT23     | 2147  | 25.4554  | 48.4544  | -0.928656 | 0.00025 | 0.00665625 |
| NM_015907.2       | 51056        | LAP3      | 2100  | 69.7938  | 135.428  | -0.956359 | 0.00025 | 0.00665625 |
| NM_001089584.1    | 134121       | C5orf49   | 1026  | 9.71501  | 23.1254  | -1.25119  | 0.00025 | 0.00665625 |
| ENST00000514532.2 | ENSG00000248 | GDNF-AS1  | 2913  | 1.95066  | 0.408158 | 2.25676   | 0.00025 | 0.00665625 |
| NM_001077418.1    | 79583        | TMEM231   | 2891  | 12.4892  | 25.0033  | -1.00143  | 0.00025 | 0.00665625 |
| NM_006083.3       | 3550         | IK        | 1935  | 72.0982  | 137.998  | -0.936615 | 0.00025 | 0.00665625 |
| NM_206996.2       | 200162       | SPAG17    | 7125  | 7.84834  | 19.8541  | -1.33898  | 0.00025 | 0.00665625 |
| NM_181844.3       | 255877       | BCL6B     | 3525  | 5.72152  | 2.36081  | 1.27712   | 0.00025 | 0.00665625 |
| NM_001004431.1    | 284207       | METRNL    | 1333  | 27.9765  | 12.8821  | 1.11885   | 0.00025 | 0.00665625 |
| NM_019594.3       | 56262        | LRRC8A    | 4355  | 11.6663  | 5.68203  | 1.03787   | 0.00025 | 0.00665625 |
| NM_012431.2       | 9723         | SEMA3E    | 6629  | 0.205248 | 2.02283  | -3.30094  | 0.0003  | 0.00772176 |
| NM_015719.3       | 50509        | COL5A3    | 6174  | 3.07053  | 1.34373  | 1.19225   | 0.0003  | 0.00772176 |
| NM_152879.2       | 8527         | DGKD      | 6294  | 8.68417  | 4.12902  | 1.07259   | 0.0003  | 0.00772176 |
| NM_000336.2       | 6338         | SCNN1B    | 2597  | 4.25172  | 10.0763  | -1.24484  | 0.0003  | 0.00772176 |
| NM_000297.3       | 5311         | PKD2      | 5079  | 29.6157  | 15.8803  | 0.899122  | 0.0003  | 0.00772176 |
| XM_003118942.2    | 374467       | C12orf63  | 2401  | 6.2977   | 12.83    | -1.02662  | 0.0003  | 0.00772176 |
| NM_002821.3       | 5754         | PTK7      | 4249  | 23.8089  | 11.3763  | 1.06547   | 0.0003  | 0.00772176 |
| XM_003403450.1    | 4586         | MUC5AC    | 6325  | 52.1879  | 21.5062  | 1.27896   | 0.0003  | 0.00772176 |
| NM_004778.2       | 11251        | GPR44     | 2910  | 6.43424  | 0.402489 | 3.99875   | 0.0003  | 0.00772176 |
| NM_139285.2       | 246176       | GAS2L2    | 3007  | 2.55213  | 5.69108  | -1.157    | 0.0003  | 0.00772176 |
| NM_001014440.3    | 440836       | ODF3B     | 970   | 4.62358  | 13.1412  | -1.50701  | 0.0003  | 0.00772176 |
| NM_003263.3       | 7096         | TLR1      | 2851  | 13.0177  | 23.8167  | -0.871502 | 0.0003  | 0.00772176 |
| NM_022486.3       | 64420        | SUSD1     | 2996  | 20.4848  | 10.8175  | 0.921188  | 0.0003  | 0.00772176 |
| NM_017539.1       | 55567        | DNAH3     | 12351 | 9.27592  | 18.5056  | -0.996401 | 0.0003  | 0.00772176 |
| NM_001166114.1    | 10908        | PNPLA6    | 4389  | 8.08424  | 2.78205  | 1.53896   | 0.0003  | 0.00772176 |
| NM_080627.2       | 140710       | KIAA0889  | 8036  | 5.66602  | 2.73365  | 1.05151   | 0.0003  | 0.00772176 |
| NM_001884.3       | 1404         | HAPLN1    | 4678  | 1.84705  | 0.565044 | 1.70879   | 0.0003  | 0.00772176 |
| NM_005013.2       | 4925         | NUCB2     | 1612  | 123.968  | 239.087  | -0.947565 | 0.0003  | 0.00772176 |
| NM_022097.2       | 63928        | CHP2      | 2366  | 2.0191   | 5.60138  | -1.47207  | 0.0003  | 0.00772176 |
| NM_004490.2       | 2888         | GRB14     | 2387  | 2.43755  | 0.308812 | 2.98063   | 0.0003  | 0.00772176 |
| TCONS_00224870    | XLOC_019135  | -         | 2003  | 1.79271  | 0.386383 | 2.21404   | 0.0003  | 0.00772176 |
| NM_025059.3       | 80129        | C6orf97   | 5283  | 19.8813  | 36.7545  | -0.886507 | 0.0003  | 0.00772176 |
| NM_001145077.1    | 390205       | LRRC10B   | 2219  | 5.45324  | 11.6081  | -1.08995  | 0.0003  | 0.00772176 |
| NM_057179.2       | 117581       | TWIST2    | 1176  | 3.87553  | 0.927569 | 2.06287   | 0.0003  | 0.00772176 |
| NM_002380.3       | 4147         | MATN2     | 4110  | 7.87563  | 3.04024  | 1.37321   | 0.0003  | 0.00772176 |
| TCONS_00143182    | XLOC_012967  | -         | 403   | 4.05286  | 20.7284  | -2.3546   | 0.0003  | 0.00772176 |
| NM_080475.2       | 89778        | SERPINB11 | 1731  | 16.0947  | 6.30464  | 1.3521    | 0.0003  | 0.00772176 |
| NM_003798.2       | 8727         | CTNNA1    | 2445  | 72.7985  | 39.3277  | 0.888362  | 0.0003  | 0.00772176 |
| NM_005442.2       | 8320         | EOMES     | 2754  | 2.49774  | 6.17175  | -1.30505  | 0.0003  | 0.00772176 |
| NM_019032.4       | 54507        | ADAMTSL4  | 4202  | 3.58341  | 1.49578  | 1.26044   | 0.00035 | 0.00869612 |
| NM_001102469.1    | 643418       | LIPN      | 1197  | 7.02151  | 0.224737 | 4.96547   | 0.00035 | 0.00869612 |

|                   |              |          |       |          |          |           |         |            |
|-------------------|--------------|----------|-------|----------|----------|-----------|---------|------------|
| NM_006259.1       | 5593         | PRKG2    | 3328  | 0.535246 | 1.91374  | -1.83812  | 0.00035 | 0.00869612 |
| NM_007074.3       | 11151        | CORO1A   | 1815  | 36.571   | 17.8798  | 1.03237   | 0.00035 | 0.00869612 |
| NM_001142651.1    | 54492        | NEURL1B  | 6417  | 13.1156  | 7.04277  | 0.897073  | 0.00035 | 0.00869612 |
| TCONS_00289951    | XLOC_024322  | -        | 3108  | 0.228008 | 1.22366  | -2.42405  | 0.00035 | 0.00869612 |
| NM_080792.2       | 140885       | SIRPA    | 3868  | 13.0512  | 5.41145  | 1.27009   | 0.00035 | 0.00869612 |
| NM_007047.3       | 11118        | BTN3A2   | 3812  | 8.26052  | 22.0597  | -1.41711  | 0.00035 | 0.00869612 |
| NM_025195.2       | 10221        | TRIB1    | 3633  | 39.9782  | 19.9818  | 1.00052   | 0.00035 | 0.00869612 |
| TCONS_00153471    | XLOC_013915  | -        | 2214  | 0.472395 | 2.07115  | -2.13237  | 0.00035 | 0.00869612 |
| NM_021202.1       | 58476        | TP53INP2 | 4124  | 8.59809  | 4.2817   | 1.00583   | 0.00035 | 0.00869612 |
| NM_003777.3       | 8701         | DNAH11   | 14189 | 10.0375  | 19.8148  | -0.981183 | 0.00035 | 0.00869612 |
| NM_018012.3       | 55083        | KIF26B   | 7287  | 3.0548   | 1.3824   | 1.1439    | 0.00035 | 0.00869612 |
| NM_198460.2       | 163351       | GBP6     | 4867  | 4.21823  | 8.84787  | -1.06869  | 0.00035 | 0.00869612 |
| NM_194298.2       | 220963       | SLC16A9  | 3987  | 11.835   | 6.02939  | 0.97298   | 0.00035 | 0.00869612 |
| NM_001846.2       | 1284         | COL4A2   | 6264  | 53.7907  | 28.2307  | 0.93009   | 0.00035 | 0.00869612 |
| NM_182758.2       | 256764       | WDR72    | 7309  | 1.47999  | 3.37921  | -1.1911   | 0.00035 | 0.00869612 |
| NM_012072.3       | 22918        | CD93     | 6701  | 46.816   | 23.9538  | 0.966748  | 0.00035 | 0.00869612 |
| NM_014375.2       | 26998        | FETUB    | 1627  | 4.32611  | 0.143275 | 4.91622   | 0.00035 | 0.00869612 |
| NM_001144759.1    | 23187        | PHLDB1   | 5298  | 10.2294  | 5.39679  | 0.922552  | 0.00035 | 0.00869612 |
| NM_004962.3       | 2662         | GDF10    | 2650  | 0.340603 | 1.86481  | -2.45286  | 0.00035 | 0.00869612 |
| NM_003221.3       | 7021         | TFAP2B   | 5770  | 3.00171  | 1.31863  | 1.18675   | 0.00035 | 0.00869612 |
| NM_006988.3       | 9510         | ADAMTS1  | 4651  | 107.144  | 46.9244  | 1.19114   | 0.00035 | 0.00869612 |
| NM_001855.3       | 1306         | COL15A1  | 5273  | 116.82   | 57.4323  | 1.02436   | 0.00035 | 0.00869612 |
| NM_198507.1       | 345757       | FAM174A  | 1236  | 21.8669  | 42.2332  | -0.949629 | 0.00035 | 0.00869612 |
| NM_144980.3       | 168090       | C6orf118 | 1839  | 6.11382  | 12.7925  | -1.06516  | 0.0004  | 0.00971957 |
| NM_145170.3       | 118491       | TTC18    | 3704  | 10.4075  | 20.0308  | -0.944588 | 0.0004  | 0.00971957 |
| NM_213569.2       | 10529        | NEBL     | 6941  | 14.6204  | 29.8108  | -1.02786  | 0.0004  | 0.00971957 |
| NM_014226.1       | 5891         | RAGE     | 1934  | 4.32682  | 9.44141  | -1.12569  | 0.0004  | 0.00971957 |
| NM_016562.3       | 51284        | TLR7     | 4992  | 3.58595  | 7.00989  | -0.967037 | 0.0004  | 0.00971957 |
| NM_002801.3       | 5699         | PSMB10   | 1006  | 26.6902  | 51.9012  | -0.959457 | 0.0004  | 0.00971957 |
| NM_207313.1       | 124842       | TMEM132E | 4369  | 1.13778  | 0.301697 | 1.91504   | 0.0004  | 0.00971957 |
| NM_001040274.2    | 221711       | SYCP2L   | 3130  | 2.2879   | 0.774837 | 1.56206   | 0.0004  | 0.00971957 |
| NM_005806.2       | 10215        | OLIG2    | 2488  | 1.08761  | 0.171761 | 2.66268   | 0.0004  | 0.00971957 |
| NM_001145033.1    | 387763       | C11orf96 | 1328  | 9.44974  | 3.40884  | 1.47099   | 0.0004  | 0.00971957 |
| NM_014330.3       | 23645        | PPP1R15A | 2383  | 47.0427  | 24.2297  | 0.957196  | 0.0004  | 0.00971957 |
| NM_000379.3       | 7498         | XDH      | 5717  | 3.00296  | 6.25099  | -1.0577   | 0.0004  | 0.00971957 |
| NM_013402.4       | 3992         | FADS1    | 4420  | 13.798   | 7.16211  | 0.946005  | 0.0004  | 0.00971957 |
| NM_145640.2       | 80833        | APOL3    | 2124  | 20.5528  | 37.1896  | -0.855565 | 0.0004  | 0.00971957 |
| NM_145243.3       | 115209       | OMA1     | 1909  | 27.9154  | 50.1397  | -0.844893 | 0.0004  | 0.00971957 |
| NM_001300.5       | 1316         | KLF6     | 4662  | 51.0315  | 25.4495  | 1.00375   | 0.0004  | 0.00971957 |
| NM_000691.4       | 218          | ALDH3A1  | 1779  | 72.1661  | 32.63    | 1.14512   | 0.0004  | 0.00971957 |
| NM_033502.2       | 55809        | TRERF1   | 7580  | 7.22286  | 3.76842  | 0.938609  | 0.00045 | 0.0106989  |
| NM_003036.3       | 6497         | SKI      | 5707  | 12.5514  | 6.65812  | 0.914662  | 0.00045 | 0.0106989  |
| TCONS_00220393    | XLOC_019116  | -        | 2293  | 0.560533 | 2.14554  | -1.93647  | 0.00045 | 0.0106989  |
| NM_000910.2       | 4887         | NPY2R    | 3626  | 0.0687   | 0.776632 | -3.49885  | 0.00045 | 0.0106989  |
| NM_022147.2       | 64108        | RTP4     | 1014  | 8.26535  | 19.5269  | -1.24031  | 0.00045 | 0.0106989  |
| NM_152505.3       | 150082       | LCA5L    | 2364  | 3.26647  | 7.84089  | -1.26328  | 0.00045 | 0.0106989  |
| NM_213607.1       | 388389       | CCDC103  | 1256  | 4.29614  | 10.599   | -1.30281  | 0.00045 | 0.0106989  |
| NM_023036.4       | 64446        | DNAI2    | 2279  | 3.21297  | 9.18021  | -1.51462  | 0.00045 | 0.0106989  |
| NM_001080383.1    | 10052        | GJC1     | 7640  | 5.39705  | 1.39741  | 1.94942   | 0.00045 | 0.0106989  |
| NM_003054.4       | 6571         | SLC18A2  | 3872  | 21.8743  | 12.0281  | 0.862829  | 0.00045 | 0.0106989  |
| NM_153259.2       | 255231       | MCOLN2   | 3044  | 1.94107  | 4.79802  | -1.30559  | 0.00045 | 0.0106989  |
| ENST00000517927.1 | ENSG00000253 | MIR146A  | 2301  | 1.55536  | 4.34139  | -1.48091  | 0.00045 | 0.0106989  |
| NM_199242.2       | 201294       | UNC13D   | 4393  | 5.54494  | 2.57293  | 1.10776   | 0.00045 | 0.0106989  |
| NM_130810.3       | 161582       | DYX1C1   | 1993  | 4.95038  | 15.2245  | -1.62079  | 0.00045 | 0.0106989  |

|                |             |              |       |          |          |           |         |           |
|----------------|-------------|--------------|-------|----------|----------|-----------|---------|-----------|
| NM_030968.2    | 114897      | C1QTNF1      | 2886  | 6.10816  | 2.40612  | 1.34403   | 0.00045 | 0.0106989 |
| NM_152290.2    | 93190       | C1orf158     | 1019  | 3.24005  | 9.91014  | -1.61289  | 0.00045 | 0.0106989 |
| TCONS_00051124 | XLOC_004438 | -            | 2822  | 1.0297   | 0.236757 | 2.12075   | 0.00045 | 0.0106989 |
| NM_001136023.1 | 4778        | NFE2         | 1648  | 3.5887   | 0.94211  | 1.9295    | 0.00045 | 0.0106989 |
| NM_000389.4    | 1026        | CDKN1A       | 2159  | 27.6653  | 13.9411  | 0.988735  | 0.0005  | 0.0116249 |
| NM_021181.3    | 57823       | SLAMF7       | 2657  | 27.8412  | 50.9278  | -0.871232 | 0.0005  | 0.0116249 |
| NM_005940.3    | 4320        | MMP11        | 2261  | 6.91969  | 2.52046  | 1.45702   | 0.0005  | 0.0116249 |
| NM_020869.3    | 100506627   | DCDC5        | 4759  | 2.80936  | 5.95678  | -1.08429  | 0.0005  | 0.0116249 |
| NM_001145018.1 | 283152      | CCDC153      | 767   | 4.90997  | 13.1147  | -1.4174   | 0.0005  | 0.0116249 |
| NM_001195278.1 | 100507421   | LOC100507421 | 10558 | 0.766039 | 1.73683  | -1.18097  | 0.0005  | 0.0116249 |
| NM_005618.3    | 28514       | DLL1         | 3310  | 5.08169  | 2.19691  | 1.20984   | 0.0005  | 0.0116249 |
| NM_016341.3    | 51196       | PLCE1        | 7992  | 14.7703  | 7.8013   | 0.92091   | 0.0005  | 0.0116249 |
| NM_024870.2    | 80243       | PREX2        | 5132  | 36.3002  | 17.9356  | 1.01715   | 0.0005  | 0.0116249 |
| NM_001630.2    | 244         | ANXA8L2      | 2030  | 3.88099  | 1.39666  | 1.47445   | 0.0005  | 0.0116249 |
| NM_024783.3    | 79841       | AGBL2        | 3593  | 4.97866  | 9.67783  | -0.958927 | 0.0005  | 0.0116249 |
| NM_000088.3    | 1277        | COL1A1       | 5927  | 100.885  | 40.5953  | 1.31333   | 0.0005  | 0.0116249 |
| TCONS_00295615 | XLOC_025629 | -            | 3213  | 3.62509  | 1.36221  | 1.41206   | 0.0005  | 0.0116249 |
| 28834          | 28834       | -            | 318   | 24.9177  | 65.6492  | -1.39761  | 0.0005  | 0.0116249 |
| NM_173528.2    | 161502      | C15orf26     | 1575  | 4.11994  | 9.90668  | -1.26578  | 0.0005  | 0.0116249 |
| NM_001170700.1 | 401124      | DTHD1        | 4336  | 11.1902  | 23.9655  | -1.09873  | 0.0005  | 0.0116249 |
| NM_000552.3    | 7450        | VWF          | 8833  | 48.438   | 22.4904  | 1.10683   | 0.0005  | 0.0116249 |
| NM_181789.2    | 342035      | GLDN         | 5084  | 3.7917   | 1.64141  | 1.20791   | 0.00055 | 0.0124813 |
| NM_022350.3    | 64167       | ERAP2        | 5691  | 6.15131  | 21.9504  | -1.83528  | 0.00055 | 0.0124813 |
| NM_000882.3    | 3592        | IL12A        | 1443  | 0.52224  | 2.26183  | -2.11471  | 0.00055 | 0.0124813 |
| NM_001145442.1 | 641455      | POTEM        | 6666  | 0.27445  | 0.823286 | -1.58485  | 0.00055 | 0.0124813 |
| NM_138373.3    | 91663       | MYADM        | 3054  | 9.441    | 3.99434  | 1.24098   | 0.00055 | 0.0124813 |
| NM_133639.3    | 171177      | RHOV         | 1705  | 9.88452  | 19.826   | -1.00415  | 0.00055 | 0.0124813 |
| NM_018191.3    | 55213       | RCBTB1       | 4033  | 45.4989  | 24.2525  | 0.907699  | 0.00055 | 0.0124813 |
| NM_006573.4    | 10673       | TNFSF13B     | 2671  | 7.06613  | 14.1867  | -1.00554  | 0.00055 | 0.0124813 |
| NM_004061.3    | 1010        | CDH12        | 4345  | 0.634424 | 1.73076  | -1.44788  | 0.00055 | 0.0124813 |
| NM_017654.3    | 54809       | SAMD9        | 6855  | 21.0549  | 38.3283  | -0.864252 | 0.00055 | 0.0124813 |
| NM_138319.2    | 5046        | PCSK6        | 4513  | 4.43193  | 1.36744  | 1.69645   | 0.00055 | 0.0124813 |
| NM_001008747.1 | 441294      | CTAGE15P     | 2355  | 1.47239  | 0.29249  | 2.3317    | 0.00055 | 0.0124813 |
| NM_004815.3    | 9411        | ARHGAP29     | 9117  | 26.7145  | 14.313   | 0.900296  | 0.00055 | 0.0124813 |
| NM_130445.2    | 80781       | COL18A1      | 5391  | 22.0442  | 8.94175  | 1.30177   | 0.00055 | 0.0124813 |
| NM_003294.3    | 7177        | TPSAB1       | 1194  | 31.0668  | 15.2213  | 1.02928   | 0.00055 | 0.0124813 |
| NM_016406.3    | 51506       | UFC1         | 1122  | 56.2294  | 102.054  | -0.859942 | 0.00055 | 0.0124813 |
| NM_182985.3    | 140691      | TRIM69       | 1901  | 0.8744   | 2.88147  | -1.72044  | 0.00055 | 0.0124813 |
| NM_002038.3    | 2537        | IFI6         | 836   | 14.3923  | 35.7876  | -1.31416  | 0.0006  | 0.013408  |
| NM_002081.2    | 2817        | GPC1         | 3686  | 5.11621  | 2.36313  | 1.11438   | 0.0006  | 0.013408  |
| NM_007257.5    | 10687       | PNMA2        | 4846  | 0.294481 | 0.987197 | -1.74516  | 0.0006  | 0.013408  |
| NM_001077594.1 | 91828       | EXOC3L4      | 2581  | 0.188116 | 0.970132 | -2.36656  | 0.0006  | 0.013408  |
| NM_022073.3    | 112399      | EGLN3        | 2722  | 22.4964  | 40.2903  | -0.840738 | 0.0006  | 0.013408  |
| NM_001764.2    | 910         | CD1B         | 1396  | 2.09678  | 0.474486 | 2.14374   | 0.0006  | 0.013408  |
| NM_032965.4    | 6359        | CCL15        | 1080  | 1.17134  | 4.10135  | -1.80794  | 0.0006  | 0.013408  |
| NM_006074.4    | 10346       | TRIM22       | 3091  | 53.6723  | 95.9699  | -0.838404 | 0.0006  | 0.013408  |
| NM_003745.1    | 8651        | SOCS1        | 1216  | 8.32931  | 2.88059  | 1.53183   | 0.0006  | 0.013408  |
| NM_020795.2    | 57555       | NLGN2        | 4642  | 3.73661  | 1.69618  | 1.13944   | 0.00065 | 0.0142695 |
| NM_138337.5    | 160364      | CLEC12A      | 1555  | 11.8007  | 4.18697  | 1.49489   | 0.00065 | 0.0142695 |
| NM_032606.3    | 84698       | CAPS2        | 2135  | 6.00691  | 12.5271  | -1.06035  | 0.00065 | 0.0142695 |
| NM_030636.2    | 80820       | EEDP1        | 4687  | 3.16523  | 1.39822  | 1.17872   | 0.00065 | 0.0142695 |
| NM_173565.3    | 222967      | RSPH10B      | 3106  | 1.18031  | 3.06025  | -1.37449  | 0.00065 | 0.0142695 |
| TCONS_00297361 | XLOC_024773 | -            | 1955  | 2.43246  | 0.783058 | 1.63522   | 0.00065 | 0.0142695 |
| NM_015653.3    | 26150       | RIBC2        | 1396  | 3.66533  | 9.2001   | -1.32771  | 0.00065 | 0.0142695 |



|                   |              |            |       |          |          |           |         |           |
|-------------------|--------------|------------|-------|----------|----------|-----------|---------|-----------|
| NM_018984.3       | 54434        | SSH1       | 8535  | 10.1446  | 5.6266   | 0.850375  | 0.00065 | 0.0142695 |
| NM_005101.3       | 9636         | ISG15      | 667   | 9.34711  | 23.4989  | -1.33     | 0.00065 | 0.0142695 |
| NM_018240.5       | 55243        | KIRREL     | 3614  | 11.9791  | 6.42204  | 0.899411  | 0.00065 | 0.0142695 |
| NM_020893.2       | 100499483    | C9orf174   | 5635  | 5.77593  | 10.6185  | -0.878451 | 0.00065 | 0.0142695 |
| NM_030882.2       | 23780        | APOL2      | 2545  | 19.4726  | 34.9894  | -0.845475 | 0.00065 | 0.0142695 |
| NM_003141.3       | 6737         | TRIM21     | 1929  | 14.6069  | 27.0678  | -0.889933 | 0.00065 | 0.0142695 |
| NM_014220.2       | 4071         | TM4SF1     | 1691  | 88.6085  | 49.9385  | 0.827291  | 0.00065 | 0.0142695 |
| NM_001001.3       | 6166         | RPL36AL    | 523   | 300.209  | 524.487  | -0.80494  | 0.00065 | 0.0142695 |
| NM_194302.2       | 255101       | CCDC108    | 5945  | 1.19487  | 2.83059  | -1.24425  | 0.00065 | 0.0142695 |
| NM_001548.3       | 3434         | IFIT1      | 1861  | 20.1525  | 36.7984  | -0.868681 | 0.00065 | 0.0142695 |
| NM_152419.2       | 138050       | HGSNAT     | 5214  | 15.348   | 8.76072  | 0.808931  | 0.0007  | 0.015106  |
| NM_005127.2       | 9976         | CLEC2B     | 2038  | 18.8982  | 33.8776  | -0.842085 | 0.0007  | 0.015106  |
| NM_001174072.1    | 256987       | SERINC5    | 6479  | 24.783   | 14.2033  | 0.80313   | 0.0007  | 0.015106  |
| NM_003714.2       | 8614         | STC2       | 5343  | 1.74891  | 0.706586 | 1.30752   | 0.0007  | 0.015106  |
| NM_020812.2       | 57572        | DOCK6      | 6387  | 3.42954  | 1.63271  | 1.07074   | 0.0007  | 0.015106  |
| NM_003253.2       | 7074         | TIAM1      | 7198  | 7.1131   | 3.84601  | 0.887117  | 0.0007  | 0.015106  |
| XM_373925.8       | 388813       | LOC388813  | 886   | 3.68341  | 0.278227 | 3.72671   | 0.0007  | 0.015106  |
| NM_001099221.1    | 497189       | TIFAB      | 1273  | 0.327221 | 2.10709  | -2.68691  | 0.0007  | 0.015106  |
| NM_017523.2       | 54739        | XAF1       | 3626  | 8.32362  | 21.9837  | -1.40115  | 0.0007  | 0.015106  |
| NM_000573.3       | 1378         | CR1        | 8616  | 13.4739  | 6.72801  | 1.00191   | 0.0007  | 0.015106  |
| NM_173808.2       | 257194       | NEGR1      | 5669  | 2.27603  | 4.85205  | -1.09207  | 0.0007  | 0.015106  |
| NM_001112802.1    | 6546         | SLC8A1     | 6032  | 12.9548  | 23.0085  | -0.828683 | 0.0007  | 0.015106  |
| NM_001004303.4    | 199920       | C1orf168   | 3460  | 2.06803  | 4.61639  | -1.1585   | 0.0007  | 0.015106  |
| NM_004795.3       | 9365         | KL         | 5006  | 4.16757  | 2.00357  | 1.05663   | 0.0007  | 0.015106  |
| NM_144993.1       | 200424       | TET3       | 10983 | 8.97817  | 5.00923  | 0.841833  | 0.0007  | 0.015106  |
| NM_006500.2       | 4162         | MCAM       | 3332  | 37.3498  | 21.1585  | 0.819866  | 0.0007  | 0.015106  |
| NM_001004306.1    | 339184       | CCDC144NL  | 2806  | 0.156135 | 0.824593 | -2.40089  | 0.0007  | 0.015106  |
| NM_003608.3       | 8477         | GPR65      | 4522  | 18.477   | 9.4031   | 0.97452   | 0.00075 | 0.0159498 |
| NM_001135217.1    | 10233        | LRRC23     | 1800  | 15.7882  | 40.1114  | -1.34517  | 0.00075 | 0.0159498 |
| ENST00000457157.2 | ENSG00000231 | AP000688.8 | 1048  | 2.87908  | 8.02273  | -1.47848  | 0.00075 | 0.0159498 |
| NM_001657.2       | 374          | AREG       | 1238  | 11.8994  | 0.20792  | 5.83872   | 0.00075 | 0.0159498 |
| NM_080387.4       | 338339       | CLEC4D     | 1936  | 0.448695 | 1.80565  | -2.00871  | 0.00075 | 0.0159498 |
| NM_000639.1       | 356          | FASLG      | 1860  | 2.1693   | 5.55165  | -1.35569  | 0.00075 | 0.0159498 |
| NM_001139490.1    | 26146        | TRAF3IP1   | 3978  | 11.3496  | 20.5616  | -0.857316 | 0.00075 | 0.0159498 |
| NM_006685.3       | 10879        | SMR3B      | 785   | 5.9163   | 0.425649 | 3.79696   | 0.00075 | 0.0159498 |
| NM_198483.3       | 285180       | HUFY4      | 2761  | 0.484136 | 1.45906  | -1.59155  | 0.00075 | 0.0159498 |
| NM_016323.2       | 51191        | HERC5      | 3513  | 5.74998  | 11.1461  | -0.954909 | 0.00075 | 0.0159498 |
| NM_023037.2       | 10129        | FRY        | 10717 | 16.9511  | 9.44066  | 0.844416  | 0.00075 | 0.0159498 |
| NM_003045.4       | 6541         | SLC7A1     | 7343  | 12.3015  | 6.85692  | 0.843197  | 0.00075 | 0.0159498 |
| NM_002982.3       | 6347         | CCL2       | 749   | 116.617  | 61.4655  | 0.923925  | 0.00075 | 0.0159498 |
| NM_001080522.2    | 57545        | CC2D2A     | 5240  | 11.7128  | 20.9343  | -0.837778 | 0.0008  | 0.0168217 |
| NM_000846.4       | 2939         | GSTA2      | 1309  | 8.29282  | 3.1517   | 1.39573   | 0.0008  | 0.0168217 |
| NM_001008220.1    | 10814        | CPLX2      | 4676  | 0.859335 | 0.252785 | 1.76531   | 0.0008  | 0.0168217 |
| NM_001085429.1    | 155006       | TMEM213    | 3390  | 5.64097  | 14.6229  | -1.37422  | 0.0008  | 0.0168217 |
| NM_007351.2       | 22915        | MMRN1      | 4969  | 42.9437  | 21.3202  | 1.01022   | 0.0008  | 0.0168217 |
| TCONS_00011431    | XLOC_002514  | -          | 5004  | 0.258956 | 0.804755 | -1.63585  | 0.0008  | 0.0168217 |
| NM_032446.2       | 84466        | MEGF10     | 7689  | 1.38892  | 0.55008  | 1.33625   | 0.0008  | 0.0168217 |
| NM_032133.4       | 84073        | MYCBPAP    | 3190  | 1.12218  | 2.88819  | -1.36387  | 0.0008  | 0.0168217 |
| NM_173855.4       | 283385       | MORN3      | 1158  | 2.43195  | 6.64495  | -1.45014  | 0.00085 | 0.0176689 |
| NM_000046.3       | 411          | ARSB       | 6076  | 10.7126  | 5.8005   | 0.885064  | 0.00085 | 0.0176689 |
| NM_018482.2       | 50807        | ASAP1      | 6042  | 29.2342  | 16.6334  | 0.813574  | 0.00085 | 0.0176689 |
| NM_175571.2       | 155038       | GIMAP8     | 3943  | 11.2936  | 20.4301  | -0.855189 | 0.00085 | 0.0176689 |
| NM_001007544.1    | 440712       | C1orf186   | 1129  | 13.5028  | 5.76881  | 1.22692   | 0.00085 | 0.0176689 |
| NM_014312.3       | 23584        | VSIG2      | 1121  | 12.0712  | 4.8001   | 1.33043   | 0.00085 | 0.0176689 |

|                |             |          |       |          |           |           |         |           |
|----------------|-------------|----------|-------|----------|-----------|-----------|---------|-----------|
| NM_000204.3    | 3426        | CFI      | 2161  | 127.844  | 70.8531   | 0.851476  | 0.00085 | 0.0176689 |
| NM_181449.2    | 342510      | CD300E   | 3525  | 0.944227 | 2.35534   | -1.31873  | 0.00085 | 0.0176689 |
| NM_005401.4    | 5784        | PTPN14   | 13443 | 13.8102  | 7.92609   | 0.801058  | 0.00085 | 0.0176689 |
| NM_207517.2    | 57188       | ADAMTSL3 | 7336  | 1.00455  | 2.21176   | -1.13864  | 0.00085 | 0.0176689 |
| TCONS_00268990 | XLOC_023119 | -        | 3294  | 0.489037 | 2.03454   | -2.05669  | 0.00085 | 0.0176689 |
| NM_018402.1    | 55801       | IL26     | 1047  | 0.304866 | 2.5518    | -3.06527  | 0.00085 | 0.0176689 |
| NM_001206.2    | 687         | KLF9     | 5208  | 46.8671  | 24.5521   | 0.93273   | 0.0009  | 0.0184743 |
| TCONS_00017868 | XLOC_001000 | -        | 1620  | 1.66766  | 4.99146   | -1.58164  | 0.0009  | 0.0184743 |
| NM_003821.5    | 8767        | RIPK2    | 2585  | 12.6198  | 6.28924   | 1.00474   | 0.0009  | 0.0184743 |
| NM_002984.2    | 6351        | CCL4     | 667   | 33.9214  | 14.8883   | 1.18802   | 0.0009  | 0.0184743 |
| NM_005204.2    | 1326        | MAP3K8   | 3096  | 30.9818  | 16.5043   | 0.908578  | 0.0009  | 0.0184743 |
| NM_033274.3    | 8728        | ADAM19   | 6481  | 10.8558  | 5.89477   | 0.88096   | 0.0009  | 0.0184743 |
| NM_030764.3    | 79368       | FCRL2    | 2589  | 1.88063  | 4.58836   | -1.28676  | 0.0009  | 0.0184743 |
| NM_024940.6    | 80005       | DOCK5    | 7555  | 15.4059  | 8.69233   | 0.825665  | 0.0009  | 0.0184743 |
| TCONS_00223119 | XLOC_019117 | -        | 1701  | 1.20423  | 3.82252   | -1.66641  | 0.0009  | 0.0184743 |
| NM_152275.3    | 92104       | TTC30A   | 4669  | 6.95082  | 12.389    | -0.833803 | 0.0009  | 0.0184743 |
| NM_054027.4    | 56172       | ANKH     | 8207  | 18.9332  | 10.6418   | 0.831182  | 0.0009  | 0.0184743 |
| NM_144966.5    | 158326      | FREM1    | 10086 | 3.61922  | 1.86734   | 0.954691  | 0.0009  | 0.0184743 |
| NM_015529.2    | 26002       | MOXD1    | 3039  | 5.96796  | 11.5219   | -0.949073 | 0.0009  | 0.0184743 |
| NM_001010978.2 | 388633      | LDLRAD1  | 785   | 4.76103  | 13.1774   | -1.46872  | 0.0009  | 0.0184743 |
| NM_002381.4    | 4148        | MATN3    | 2583  | 3.62209  | 1.41571   | 1.3553    | 0.00095 | 0.0192772 |
| NM_001198568.1 | 196883      | ADCY4    | 3720  | 2.99196  | 1.08817   | 1.45919   | 0.00095 | 0.0192772 |
| NM_207317.1    | 133923      | ZNF474   | 1957  | 6.47632  | 13.1987   | -1.02715  | 0.00095 | 0.0192772 |
| NM_001004439.1 | 22801       | ITGA11   | 5009  | 4.91825  | 2.4233    | 1.02117   | 0.00095 | 0.0192772 |
| NM_020212.1    | 56964       | WDR93    | 2409  | 1.50382  | 3.97313   | -1.40164  | 0.00095 | 0.0192772 |
| NM_032108.3    | 10501       | SEMA6B   | 3942  | 3.40705  | 1.47447   | 1.20832   | 0.00095 | 0.0192772 |
| NM_001242729.1 | 54848       | ARHGEF38 | 5456  | 2.68672  | 5.55674   | -1.04839  | 0.00095 | 0.0192772 |
| NM_138451.1    | 115811      | IQCD     | 1350  | 4.24084  | 10.0952   | -1.25125  | 0.00095 | 0.0192772 |
| NM_201563.4    | 9103        | FCGR2C   | 1510  | 7.31261  | 15.6102   | -1.09403  | 0.00095 | 0.0192772 |
| NM_001242699.1 | 387712      | ENO4     | 2865  | 1.8675   | 4.29761   | -1.20242  | 0.001   | 0.0199964 |
| NM_182911.3    | 80705       | TSGA10   | 3664  | 6.51924  | 14.655    | -1.16861  | 0.001   | 0.0199964 |
| NM_052939.3    | 115352      | FCRL3    | 3019  | 0.754228 | 2.10801   | -1.48281  | 0.001   | 0.0199964 |
| NM_000061.2    | 695         | BTK      | 2611  | 22.4299  | 12.1575   | 0.883575  | 0.001   | 0.0199964 |
| NM_000419.3    | 3674        | ITGA2B   | 3334  | 1.06     | 0.0736001 | 3.84821   | 0.001   | 0.0199964 |
| NM_001127391.1 | 130540      | ALS2CR12 | 1944  | 3.72552  | 8.60666   | -1.20801  | 0.001   | 0.0199964 |
| NM_004273.4    | 9469        | CHST3    | 6973  | 8.48533  | 4.81123   | 0.818565  | 0.001   | 0.0199964 |
| NM_001763.2    | 909         | CD1A     | 2096  | 2.13867  | 0.614592  | 1.79901   | 0.001   | 0.0199964 |
| NM_138805.2    | 131177      | FAM3D    | 1308  | 19.2349  | 37.9367   | -0.979866 | 0.001   | 0.0199964 |
| NM_004065.2    | 1038        | CDR1     | 1299  | 8.47655  | 3.38912   | 1.32257   | 0.001   | 0.0199964 |
| TCONS_00314614 | XLOC_026613 | -        | 3674  | 2.35048  | 0.547369  | 2.10237   | 0.001   | 0.0199964 |
| NM_022122.2    | 64066       | MMP27    | 1647  | 2.18426  | 0.528107  | 2.04824   | 0.001   | 0.0199964 |
| NM_018602.3    | 55466       | DNAJA4   | 3186  | 6.74825  | 24.0916   | -1.83594  | 0.001   | 0.0199964 |
| NM_005502.3    | 19          | ABCA1    | 10503 | 15.7723  | 27.5039   | -0.802243 | 0.001   | 0.0199964 |
| NM_006890.3    | 1087        | CEACAM7  | 2289  | 0.729314 | 2.41161   | -1.72538  | 0.001   | 0.0199964 |
| NM_002049.3    | 2623        | GATA1    | 1480  | 1.96682  | 0.172154  | 3.51409   | 0.00105 | 0.0207193 |
| NM_139055.2    | 170689      | ADAMTS15 | 5676  | 2.80396  | 1.27314   | 1.13908   | 0.00105 | 0.0207193 |
| NM_002127.5    | 3135        | HLA-G    | 1578  | 0.14741  | 4.88624   | -5.05082  | 0.00105 | 0.0207193 |
| NM_001009909.2 | 338645      | LUZP2    | 5257  | 0.669382 | 1.8324    | -1.45284  | 0.00105 | 0.0207193 |
| NM_172341.1    | 55851       | PSENN    | 665   | 46.417   | 84.8574   | -0.870388 | 0.00105 | 0.0207193 |
| NM_182791.2    | 80125       | CCDC33   | 2104  | 2.22516  | 5.96347   | -1.42224  | 0.00105 | 0.0207193 |
| NM_004265.2    | 9415        | FADS2    | 3149  | 13.0949  | 6.83182   | 0.938662  | 0.00105 | 0.0207193 |
| NM_001031715.2 | 64799       | IQCH     | 4239  | 2.66142  | 5.6097    | -1.07573  | 0.00105 | 0.0207193 |
| NM_153449.2    | 144195      | SLC2A14  | 2195  | 2.0701   | 0.576444  | 1.84445   | 0.00105 | 0.0207193 |
| NM_001042406.1 | 54511       | HMGCLL1  | 2471  | 0.186472 | 0.943962  | -2.33977  | 0.00105 | 0.0207193 |

|                   |              |               |       |          |           |           |         |           |
|-------------------|--------------|---------------|-------|----------|-----------|-----------|---------|-----------|
| NM_021155.3       | 30835        | CD209         | 4328  | 10.654   | 3.92386   | 1.44104   | 0.0011  | 0.0214605 |
| NM_138983.2       | 116448       | OLIG1         | 2279  | 1.56839  | 0.0871342 | 4.1699    | 0.0011  | 0.0214605 |
| NM_004468.3       | 2275         | FHL3          | 1704  | 5.23442  | 2.14656   | 1.28601   | 0.0011  | 0.0214605 |
| NM_006094.4       | 10395        | DLC1          | 6044  | 8.48575  | 2.43629   | 1.80036   | 0.0011  | 0.0214605 |
| NM_014786.3       | 9828         | ARHGEF17      | 7813  | 7.28284  | 4.15059   | 0.811183  | 0.0011  | 0.0214605 |
| NM_178550.4       | 339512       | C1orf110      | 1552  | 13.6729  | 26.3071   | -0.94414  | 0.0011  | 0.0214605 |
| NM_138787.2       | 119710       | C11orf74      | 820   | 20.5905  | 41.3383   | -1.0055   | 0.0011  | 0.0214605 |
| NM_020817.1       | 57577        | KIAA1407      | 3976  | 6.68479  | 12.0694   | -0.852398 | 0.0011  | 0.0214605 |
| NM_003707.2       | 8607         | RUVBL1        | 1768  | 23.6104  | 41.3197   | -0.80741  | 0.0011  | 0.0214605 |
| NM_181426.1       | 339829       | CCDC39        | 3854  | 10.2866  | 18.7134   | -0.863298 | 0.0011  | 0.0214605 |
| NM_002272.3       | 3851         | KRT4          | 2147  | 12.8159  | 5.1576    | 1.31316   | 0.0011  | 0.0214605 |
| NM_182832.2       | 191585       | PLAC4         | 10009 | 9.24676  | 3.81147   | 1.2786    | 0.0011  | 0.0214605 |
| NM_138806.3       | 131450       | CD200R1       | 2272  | 18.6071  | 9.34796   | 0.993126  | 0.0011  | 0.0214605 |
| NM_002391.3       | 4192         | MDK           | 854   | 47.8818  | 84.0991   | -0.812613 | 0.00115 | 0.0222874 |
| NM_001105677.2    | 574537       | UGT2A2        | 2568  | 22.1536  | 2.74928   | 3.01042   | 0.00115 | 0.0222874 |
| NM_018010.3       | 55081        | IFT57         | 3203  | 26.8654  | 46.4517   | -0.789983 | 0.00115 | 0.0222874 |
| NM_005911.5       | 4144         | MAT2A         | 3006  | 93.8205  | 48.4813   | 0.952475  | 0.00115 | 0.0222874 |
| NM_130848.2       | 140947       | C5orf20       | 3135  | 0.504046 | 1.53527   | -1.60687  | 0.00115 | 0.0222874 |
| NM_021800.2       | 56521        | DNAJC12       | 1212  | 1.06264  | 3.9366    | -1.8893   | 0.00115 | 0.0222874 |
| NM_078483.2       | 206358       | SLC36A1       | 5773  | 5.94467  | 3.15992   | 0.911707  | 0.00115 | 0.0222874 |
| NM_145045.4       | 115948       | CCDC151       | 2162  | 1.92587  | 4.77357   | -1.30956  | 0.0012  | 0.0230244 |
| NM_015662.1       | 26160        | IFT172        | 5360  | 14.0191  | 24.2051   | -0.787917 | 0.0012  | 0.0230244 |
| NM_001080484.1    | 85452        | KIAA1751      | 4710  | 0.878993 | 2.1642    | -1.29991  | 0.0012  | 0.0230244 |
| NM_145175.2       | 151354       | FAM84A        | 6355  | 9.19153  | 5.13571   | 0.839742  | 0.0012  | 0.0230244 |
| TCONS_00156795    | XLOC_014990  | -             | 884   | 2.62064  | 0.387404  | 2.75801   | 0.0012  | 0.0230244 |
| NM_198559.1       | 375307       | C2orf62       | 1323  | 1.10026  | 3.33528   | -1.59997  | 0.0012  | 0.0230244 |
| NM_001144956.1    | 284485       | RIIAD1        | 455   | 6.99389  | 19.4759   | -1.47752  | 0.0012  | 0.0230244 |
| NM_033063.1       | 4135         | MAP6          | 2648  | 6.27087  | 13.326    | -1.08751  | 0.0012  | 0.0230244 |
| NM_014971.1       | 22979        | EFR3B         | 7458  | 1.41823  | 0.600893  | 1.23892   | 0.0012  | 0.0230244 |
| NM_001372.3       | 1770         | DNAH9         | 13750 | 6.92764  | 11.576    | -0.740705 | 0.0012  | 0.0230244 |
| NM_001122962.1    | 284759       | SIRPB2        | 2833  | 2.8641   | 0.75271   | 1.92792   | 0.0012  | 0.0230244 |
| NM_000845.2       | 2918         | GRM8          | 3559  | 1.6916   | 0.299634  | 2.49712   | 0.0012  | 0.0230244 |
| NM_173695.2       | 286464       | CXorf59       | 1956  | 6.9319   | 13.6792   | -0.980663 | 0.00125 | 0.02372   |
| NM_018584.5       | 55450        | CAMK2N1       | 2351  | 10.5932  | 5.06614   | 1.06418   | 0.00125 | 0.02372   |
| NM_206827.1       | 387496       | RASL11A       | 1543  | 11.8176  | 5.68      | 1.05697   | 0.00125 | 0.02372   |
| NM_003047.3       | 6548         | SLC9A1        | 4572  | 4.06362  | 1.98031   | 1.03704   | 0.00125 | 0.02372   |
| NM_001759.3       | 894          | CCND2         | 6522  | 49.9887  | 27.4808   | 0.863177  | 0.00125 | 0.02372   |
| NM_001009562.4    | 338821       | SLCO1B7       | 1923  | 0.16444  | 1.03948   | -2.66023  | 0.00125 | 0.02372   |
| NM_012305.3       | 161          | AP2A2         | 4653  | 9.43441  | 4.66213   | 1.01694   | 0.00125 | 0.02372   |
| ENST00000604271.2 | ENSG00000270 | RP11-355F16.1 | 3438  | 8.94045  | 2.54713   | 1.81148   | 0.00125 | 0.02372   |
| NM_003482.3       | 8085         | MLL2          | 19419 | 8.02107  | 4.71166   | 0.767558  | 0.00125 | 0.02372   |
| TCONS_00173159    | XLOC_014288  | -             | 1849  | 0.482068 | 1.66117   | -1.78489  | 0.00125 | 0.02372   |
| NM_000395.2       | 1439         | CSF2RB        | 4848  | 21.9423  | 12.4538   | 0.817131  | 0.0013  | 0.0244278 |
| 28638             | 28638        | -             | 541   | 27.7923  | 57.1797   | -1.04082  | 0.0013  | 0.0244278 |
| NM_022468.4       | 64386        | MMP25         | 3554  | 2.09125  | 0.598633  | 1.80463   | 0.0013  | 0.0244278 |
| NM_015210.3       | 23255        | CCDC165       | 6092  | 1.90827  | 0.866134  | 1.1396    | 0.0013  | 0.0244278 |
| NM_015492.4       | 56905        | C15orf39      | 4427  | 5.89063  | 3.00237   | 0.972322  | 0.0013  | 0.0244278 |
| NM_004926.2       | 677          | ZFP36L1       | 3022  | 70.8804  | 40.8176   | 0.796193  | 0.0013  | 0.0244278 |
| NM_001085447.1    | 129881       | C2orf77       | 2169  | 6.0993   | 12.3097   | -1.01308  | 0.0013  | 0.0244278 |
| NM_020949.2       | 57709        | SLC7A14       | 10133 | 1.9959   | 0.999091  | 0.998351  | 0.0013  | 0.0244278 |
| NM_002208.4       | 3682         | ITGAE         | 3861  | 3.18089  | 6.84969   | -1.10661  | 0.0013  | 0.0244278 |
| TCONS_00165548    | XLOC_013709  | -             | 2638  | 3.47828  | 1.43576   | 1.27656   | 0.0013  | 0.0244278 |
| NM_001144892.1    | 2246         | FGF1          | 3660  | 5.53292  | 2.17444   | 1.3474    | 0.0013  | 0.0244278 |
| NM_018664.2       | 55509        | BATF3         | 981   | 4.14262  | 1.27248   | 1.7029    | 0.00135 | 0.0250595 |

|                   |              |               |       |          |           |           |         |           |
|-------------------|--------------|---------------|-------|----------|-----------|-----------|---------|-----------|
| NM_078488.1       | 8875         | VNN2          | 1946  | 1.7308   | 8.73203   | -2.33488  | 0.00135 | 0.0250595 |
| NM_032876.4       | 84962        | JUB           | 4236  | 8.74499  | 4.41432   | 0.986268  | 0.00135 | 0.0250595 |
| NM_006519.2       | 6993         | DYNLT1        | 759   | 56.6525  | 100.243   | -0.823287 | 0.00135 | 0.0250595 |
| NM_001225.3       | 837          | CASP4         | 1319  | 68.1102  | 112.223   | -0.720424 | 0.00135 | 0.0250595 |
| NM_005317.2       | 3004         | GZMM          | 947   | 1.56867  | 4.69994   | -1.5831   | 0.00135 | 0.0250595 |
| NM_152367.2       | 126868       | MAB21L3       | 3229  | 14.9894  | 26.0048   | -0.794832 | 0.00135 | 0.0250595 |
| NM_005356.3       | 3932         | LCK           | 2117  | 7.39862  | 13.9656   | -0.916547 | 0.00135 | 0.0250595 |
| NM_001540.3       | 3315         | HSPB1         | 897   | 35.363   | 17.5759   | 1.00864   | 0.00135 | 0.0250595 |
| NM_000958.2       | 5734         | PTGER4        | 3416  | 21.573   | 12.321    | 0.808103  | 0.00135 | 0.0250595 |
| NM_014244.4       | 9509         | ADAMTS2       | 6754  | 10.9509  | 6.20526   | 0.819479  | 0.00135 | 0.0250595 |
| NM_030583.2       | 4147         | MATN2         | 4053  | 6.24513  | 2.37039   | 1.39761   | 0.0014  | 0.0257815 |
| NM_207015.2       | 254827       | NAALADL2      | 4912  | 6.55801  | 11.5681   | -0.818828 | 0.0014  | 0.0257815 |
| NM_178006.3       | 90627        | STARD13       | 5926  | 8.59432  | 4.14111   | 1.05336   | 0.0014  | 0.0257815 |
| NM_000161.2       | 2643         | GCH1          | 2926  | 9.08814  | 16.5023   | -0.86061  | 0.0014  | 0.0257815 |
| NM_001079872.1    | 8450         | CUL4B         | 5184  | 68.2226  | 37.7208   | 0.854891  | 0.0014  | 0.0257815 |
| NM_018485.1       | 27202        | GPR77         | 1287  | 2.52364  | 0.742035  | 1.76595   | 0.0014  | 0.0257815 |
| NM_001001555.2    | 2887         | GRB10         | 5032  | 5.43273  | 1.88856   | 1.52439   | 0.0014  | 0.0257815 |
| NM_182493.2       | 91807        | MYLK3         | 7998  | 0.309853 | 0.834925  | -1.43006  | 0.0014  | 0.0257815 |
| NM_001013627.2    | 340527       | NHSL2         | 3678  | 8.51845  | 4.12557   | 1.046     | 0.0014  | 0.0257815 |
| NM_177937.2       | 51280        | GOLM1         | 3080  | 18.891   | 50.4444   | -1.417    | 0.0014  | 0.0257815 |
| NM_020830.3       | 57590        | WDFY1         | 4607  | 39.908   | 67.8244   | -0.765127 | 0.0014  | 0.0257815 |
| TCONS_00095311    | XLOC_007699  | -             | 5854  | 0.553437 | 1.39678   | -1.33562  | 0.0014  | 0.0257815 |
| NM_003248.4       | 7060         | THBS4         | 3223  | 1.12346  | 0.367177  | 1.6134    | 0.00145 | 0.0264203 |
| NM_007244.2       | 11272        | PRR4          | 564   | 10.6538  | 2.95333   | 1.85095   | 0.00145 | 0.0264203 |
| NM_014572.2       | 26524        | LATS2         | 5543  | 10.8749  | 6.22344   | 0.805215  | 0.00145 | 0.0264203 |
| ENST00000515343.1 | ENSG00000251 | RP11-281P23.1 | 4019  | 3.2182   | 6.62469   | -1.0416   | 0.00145 | 0.0264203 |
| NM_019035.3       | 54510        | PCDH18        | 5906  | 51.4343  | 28.0625   | 0.874091  | 0.00145 | 0.0264203 |
| NM_014737.2       | 9770         | RASSF2        | 5426  | 44.2518  | 25.4755   | 0.796624  | 0.00145 | 0.0264203 |
| NM_182665.2       | 83593        | RASSF5        | 3514  | 24.6482  | 13.4319   | 0.87582   | 0.00145 | 0.0264203 |
| NM_000189.4       | 3099         | HK2           | 7093  | 13.488   | 7.87652   | 0.776048  | 0.00145 | 0.0264203 |
| NM_001109809.2    | 346171       | ZFP57         | 1870  | 0.154096 | 1.60841   | -3.38373  | 0.00145 | 0.0264203 |
| NM_021814.4       | 60481        | ELOVL5        | 3000  | 111.558  | 62.9874   | 0.824659  | 0.00145 | 0.0264203 |
| NM_001546.2       | 3400         | ID4           | 2344  | 39.4605  | 22.0881   | 0.837139  | 0.00145 | 0.0264203 |
| NM_018421.3       | 55357        | TBC1D2        | 3317  | 7.33901  | 3.74643   | 0.97007   | 0.00145 | 0.0264203 |
| NM_003068.4       | 6591         | SNAI2         | 2112  | 38.589   | 22.3048   | 0.790832  | 0.00145 | 0.0264203 |
| NM_001008.3       | 6192         | RPS4Y1        | 897   | 235.471  | 100.051   | 1.23481   | 0.00145 | 0.0264203 |
| NM_173644.1       | 284756       | C20orf197     | 2732  | 1.7911   | 0.646591  | 1.46993   | 0.00145 | 0.0264203 |
| NM_000584.3       | 3576         | IL8           | 1705  | 17.5023  | 34.9818   | -0.999059 | 0.00145 | 0.0264203 |
| NM_004212.3       | 9153         | SLC28A2       | 2463  | 0.114975 | 0.778614  | -2.75959  | 0.0015  | 0.0270821 |
| TCONS_00259832    | XLOC_021398  | -             | 724   | 0.873513 | 5.1404    | -2.55698  | 0.0015  | 0.0270821 |
| NM_001010906.1    | 389643       | C8orf80       | 3887  | 3.08058  | 6.11576   | -0.989333 | 0.0015  | 0.0270821 |
| NM_001031745.1    | 158787       | RIBC1         | 1416  | 2.28167  | 8.10986   | -1.82959  | 0.0015  | 0.0270821 |
| NM_207437.3       | 196385       | DNAH10        | 13680 | 6.57225  | 11.213    | -0.770716 | 0.0015  | 0.0270821 |
| NM_003370.3       | 7408         | VASP          | 2291  | 31.042   | 18.0479   | 0.782393  | 0.0015  | 0.0270821 |
| NM_024800.4       | 79858        | NEK11         | 2953  | 7.30507  | 14.9166   | -1.02995  | 0.0015  | 0.0270821 |
| NM_058170.2       | 118427       | OLFM3         | 3462  | 1.00447  | 0.302689  | 1.73053   | 0.0015  | 0.0270821 |
| NM_022355.2       | 64174        | DPEP2         | 1709  | 3.63164  | 1.26932   | 1.51656   | 0.0015  | 0.0270821 |
| NM_002421.3       | 4312         | MMP1          | 2055  | 18.6925  | 5.08238   | 1.87888   | 0.0015  | 0.0270821 |
| NM_012387.2       | 23569        | PADI4         | 2265  | 4.85325  | 0.0841677 | 5.84954   | 0.00155 | 0.0278206 |
| NM_152773.4       | 255758       | TCTEX1D2      | 679   | 9.06833  | 21.1493   | -1.22217  | 0.00155 | 0.0278206 |
| NM_017681.2       | 54830        | NUP62CL       | 1762  | 1.52703  | 3.93222   | -1.36461  | 0.00155 | 0.0278206 |
| NM_000817.2       | 2571         | GAD1          | 3476  | 0.959492 | 2.48666   | -1.37387  | 0.00155 | 0.0278206 |
| NM_014470.3       | 27289        | RND1          | 1665  | 3.59408  | 1.21584   | 1.56367   | 0.00155 | 0.0278206 |
| NM_001007595.2    | 388125       | C2CD4B        | 1576  | 1.86885  | 0.512985  | 1.86516   | 0.00155 | 0.0278206 |

|                |             |           |       |          |          |           |         |           |
|----------------|-------------|-----------|-------|----------|----------|-----------|---------|-----------|
| NM_003280.2    | 7134        | TNNC1     | 696   | 6.91972  | 2.07537  | 1.73734   | 0.00155 | 0.0278206 |
| NM_016333.3    | 23524       | SRRM2     | 9353  | 39.5855  | 22.7228  | 0.800833  | 0.00155 | 0.0278206 |
| NM_020377.2    | 57105       | CYSLTR2   | 2548  | 6.56887  | 3.10928  | 1.07907   | 0.0016  | 0.0284826 |
| NM_001039706.2 | 79846       | C7orf63   | 3902  | 6.30568  | 12.3613  | -0.97111  | 0.0016  | 0.0284826 |
| NM_001127443.1 | 948         | CD36      | 1812  | 19.7492  | 2.02754  | 3.28399   | 0.0016  | 0.0284826 |
| NM_024926.2    | 79989       | TTC26     | 2151  | 7.88482  | 14.6594  | -0.894677 | 0.0016  | 0.0284826 |
| NM_000370.3    | 7274        | TTPA      | 2633  | 1.74409  | 0.598018 | 1.54421   | 0.0016  | 0.0284826 |
| NM_144992.4    | 200403      | VWA3B     | 4747  | 5.95631  | 10.3993  | -0.804001 | 0.0016  | 0.0284826 |
| NM_001248.2    | 956         | ENTPD3    | 2793  | 11.7803  | 6.1803   | 0.930633  | 0.0016  | 0.0284826 |
| NM_000177.4    | 2934        | GSN       | 2649  | 197.177  | 69.3361  | 1.50781   | 0.0016  | 0.0284826 |
| NM_006725.3    | 923         | CD6       | 3289  | 1.75579  | 4.00962  | -1.19135  | 0.00165 | 0.0290957 |
| NM_002407.2    | 4246        | SCGB2A1   | 521   | 17.7776  | 38.8369  | -1.12737  | 0.00165 | 0.0290957 |
| TCONS_00091128 | XLOC_007434 | -         | 1938  | 0.535525 | 1.65951  | -1.63173  | 0.00165 | 0.0290957 |
| NM_000640.2    | 3598        | IL13RA2   | 1373  | 2.78497  | 0.558245 | 2.31869   | 0.00165 | 0.0290957 |
| NM_002005.3    | 2242        | FES       | 2783  | 10.3519  | 5.31512  | 0.961715  | 0.00165 | 0.0290957 |
| NM_004126.3    | 2791        | GNG11     | 954   | 74.0698  | 42.3736  | 0.805721  | 0.00165 | 0.0290957 |
| NM_005727.3    | 10103       | TSPAN1    | 1629  | 85.1528  | 147.321  | -0.79084  | 0.00165 | 0.0290957 |
| NM_001953.3    | 1890        | TYMP      | 1659  | 9.80753  | 26.8081  | -1.45071  | 0.00165 | 0.0290957 |
| NM_014918.4    | 22856       | CHSY1     | 4550  | 32.3763  | 18.9722  | 0.771056  | 0.00165 | 0.0290957 |
| NM_002569.2    | 5045        | FURIN     | 4180  | 12.5931  | 7.13516  | 0.819615  | 0.00165 | 0.0290957 |
| TCONS_00010095 | XLOC_000525 | -         | 2053  | 0.24841  | 1.20696  | -2.28058  | 0.0017  | 0.0297668 |
| NM_019604.2    | 56253       | CRTAM     | 2422  | 1.68403  | 4.05827  | -1.26895  | 0.0017  | 0.0297668 |
| NM_001030059.1 | 196051      | PPAPDC1A  | 1521  | 4.88901  | 1.88413  | 1.37564   | 0.0017  | 0.0297668 |
| NM_018365.2    | 55329       | MNS1      | 2023  | 10.8548  | 25.7587  | -1.24673  | 0.0017  | 0.0297668 |
| NM_012452.2    | 23495       | TNFRSF13B | 1358  | 0.75124  | 2.57065  | -1.77479  | 0.0017  | 0.0297668 |
| NM_001171.5    | 368         | ABCC6     | 5117  | 0.391075 | 1.11204  | -1.50769  | 0.0017  | 0.0297668 |
| NM_012304.3    | 23194       | FBXL7     | 4562  | 5.502    | 2.93144  | 0.908346  | 0.0017  | 0.0297668 |
| NM_006994.4    | 10384       | BTN3A3    | 3002  | 11.4458  | 21.9908  | -0.942074 | 0.0017  | 0.0297668 |
| NM_001768.6    | 925         | CD8A      | 2912  | 5.89988  | 12.1851  | -1.04636  | 0.00175 | 0.0304286 |
| NM_002221.3    | 3707        | ITPKB     | 6162  | 12.2899  | 7.14154  | 0.78317   | 0.00175 | 0.0304286 |
| NM_020066.4    | 56776       | FMN2      | 6429  | 5.73956  | 3.12918  | 0.875155  | 0.00175 | 0.0304286 |
| NM_001142864.2 | 9780        | FAM38A    | 7833  | 7.04767  | 3.99281  | 0.819742  | 0.00175 | 0.0304286 |
| NM_006009.2    | 7846        | TUBA1A    | 1666  | 131.023  | 238.354  | -0.86328  | 0.00175 | 0.0304286 |
| NM_178837.3    | 352909      | C19orf51  | 2168  | 2.62417  | 5.90632  | -1.1704   | 0.0018  | 0.0310732 |
| NM_022153.1    | 64115       | C10orf54  | 4774  | 20.5515  | 11.8568  | 0.793528  | 0.0018  | 0.0310732 |
| TCONS_00230998 | XLOC_019497 | -         | 1796  | 0.189354 | 1.45178  | -2.93866  | 0.0018  | 0.0310732 |
| NM_006486.2    | 2192        | FBLN1     | 2947  | 99.7612  | 47.6831  | 1.065     | 0.0018  | 0.0310732 |
| NM_020251.3    | 408         | ARRB1     | 7498  | 7.38815  | 3.67359  | 1.00802   | 0.0018  | 0.0310732 |
| NM_016201.2    | 51421       | AMOTL2    | 4984  | 20.2505  | 11.8955  | 0.767545  | 0.0018  | 0.0310732 |
| NM_001080495.2 | 84629       | TNRC18    | 10572 | 6.98445  | 4.14213  | 0.753774  | 0.00185 | 0.0317167 |
| NM_003733.2    | 8638        | OASL      | 1820  | 1.89067  | 4.776    | -1.33691  | 0.00185 | 0.0317167 |
| NM_198795.1    | 56165       | TDRD1     | 4510  | 1.97611  | 0.829198 | 1.25287   | 0.00185 | 0.0317167 |
| NM_000801.4    | 2280        | FKBP1A    | 1633  | 73.5474  | 42.6422  | 0.786392  | 0.00185 | 0.0317167 |
| NM_006770.3    | 8685        | MARCO     | 1835  | 3.21576  | 7.27374  | -1.17754  | 0.00185 | 0.0317167 |
| NM_207310.1    | 91409       | CCDC74B   | 1471  | 1.97281  | 4.91142  | -1.31589  | 0.00185 | 0.0317167 |
| NM_002160.2    | 3371        | TNC       | 7599  | 148.976  | 72.2417  | 1.04417   | 0.0019  | 0.0323187 |
| NM_001004310.2 | 343413      | FCRL6     | 1943  | 1.50774  | 4.07004  | -1.43265  | 0.0019  | 0.0323187 |
| NM_002205.2    | 3678        | ITGA5     | 4250  | 15.2216  | 8.64847  | 0.815608  | 0.0019  | 0.0323187 |
| NM_001127462.2 | 114548      | NLRP3     | 4290  | 5.51492  | 0.473628 | 3.54152   | 0.0019  | 0.0323187 |
| NM_005456.3    | 9479        | MAPK8IP1  | 3205  | 3.54997  | 7.0587   | -0.991595 | 0.0019  | 0.0323187 |
| NM_003270.2    | 7105        | TSPAN6    | 2069  | 39.2457  | 65.2166  | -0.732704 | 0.0019  | 0.0323187 |
| NM_005709.3    | 10083       | USH1C     | 2237  | 0.572827 | 1.89194  | -1.7237   | 0.0019  | 0.0323187 |
| NM_001128843.1 | 79931       | TNIP3     | 2429  | 0.495592 | 1.58879  | -1.68071  | 0.0019  | 0.0323187 |
| NM_002859.2    | 5829        | PXN       | 3672  | 14.0707  | 7.02171  | 1.0028    | 0.00195 | 0.0329693 |

|                |             |              |       |          |          |           |         |           |
|----------------|-------------|--------------|-------|----------|----------|-----------|---------|-----------|
| NM_002970.2    | 6303        | SAT1         | 1064  | 534.363  | 1018.91  | -0.931136 | 0.00195 | 0.0329693 |
| NM_001101357.1 | 347475      | CCDC160      | 1299  | 3.02253  | 7.59403  | -1.32911  | 0.00195 | 0.0329693 |
| NM_144962.2    | 157310      | PEBP4        | 894   | 2.14869  | 0.342296 | 2.65014   | 0.00195 | 0.0329693 |
| NM_033292.2    | 834         | CASP1        | 1357  | 24.5449  | 44.9829  | -0.873953 | 0.00195 | 0.0329693 |
| NM_004431.3    | 1969        | EPHA2        | 3964  | 9.10294  | 5.11571  | 0.831396  | 0.00195 | 0.0329693 |
| NM_001353.5    | 1645        | AKR1C1       | 1379  | 19.5827  | 34.7238  | -0.82635  | 0.00195 | 0.0329693 |
| NM_000899.4    | 4254        | KITLG        | 5443  | 54.8666  | 31.3504  | 0.807447  | 0.00195 | 0.0329693 |
| NM_001144058.1 | 50863       | NTM          | 3408  | 4.63404  | 1.42491  | 1.7014    | 0.00195 | 0.0329693 |
| NM_000424.3    | 3852        | KRT5         | 2303  | 234.244  | 115.543  | 1.01958   | 0.00195 | 0.0329693 |
| NM_003042.3    | 6529        | SLC6A1       | 4494  | 1.4566   | 0.589159 | 1.30588   | 0.002   | 0.0335868 |
| NM_152550.3    | 153769      | SH3RF2       | 3043  | 5.96655  | 2.96621  | 1.00828   | 0.002   | 0.0335868 |
| NM_003667.2    | 8549        | LGR5         | 2880  | 1.45608  | 0.522087 | 1.47972   | 0.002   | 0.0335868 |
| NM_002192.2    | 3624        | INHBA        | 2175  | 8.15161  | 3.92117  | 1.0558    | 0.002   | 0.0335868 |
| NM_005158.4    | 27          | ABL2         | 11940 | 9.50476  | 4.56226  | 1.0589    | 0.002   | 0.0335868 |
| NM_002003.3    | 2219        | FCN1         | 1283  | 17.2839  | 30.9812  | -0.841967 | 0.00205 | 0.0341961 |
| NM_001162435.2 | 100287718   | LOC100287718 | 1058  | 6.02541  | 13.4932  | -1.1631   | 0.00205 | 0.0341961 |
| NM_001783.3    | 973         | CD79A        | 1258  | 33.8568  | 62.0491  | -0.873964 | 0.00205 | 0.0341961 |
| NM_006263.2    | 5720        | PSME1        | 995   | 112.535  | 187.069  | -0.733193 | 0.00205 | 0.0341961 |
| NM_000733.3    | 916         | CD3E         | 1513  | 8.4412   | 16.3296  | -0.951965 | 0.00205 | 0.0341961 |
| TCONS_00218840 | XLOC_018567 | -            | 2102  | 1.41085  | 4.22651  | -1.5829   | 0.00205 | 0.0341961 |
| NM_182487.2    | 169611      | OLFML2A      | 6542  | 11.5504  | 6.75313  | 0.774312  | 0.00205 | 0.0341961 |
| NM_006765.3    | 7991        | TUSC3        | 3884  | 9.62925  | 19.6205  | -1.02687  | 0.00205 | 0.0341961 |
| NM_001129993.1 | 84542       | KIAA1841     | 4578  | 9.68426  | 16.7756  | -0.792652 | 0.00205 | 0.0341961 |
| NM_018956.3    | 11092       | C9orf9       | 719   | 8.76507  | 19.6947  | -1.16797  | 0.00205 | 0.0341961 |
| TCONS_00229226 | XLOC_018711 | -            | 2071  | 0.254734 | 1.04324  | -2.034    | 0.0021  | 0.0348574 |
| NM_052913.2    | 114801      | TMEM200A     | 5023  | 12.771   | 7.34052  | 0.79892   | 0.0021  | 0.0348574 |
| NM_001101376.2 | 440585      | FAM183A      | 517   | 14.872   | 34.1571  | -1.19958  | 0.0021  | 0.0348574 |
| NM_173799.3    | 201633      | TIGIT        | 2968  | 4.52306  | 8.63215  | -0.932422 | 0.0021  | 0.0348574 |
| NM_004093.3    | 1948        | EFNB2        | 4387  | 11.0504  | 6.34603  | 0.800166  | 0.00215 | 0.0355296 |
| TCONS_00105654 | XLOC_008400 | -            | 3521  | 1.33169  | 0.335198 | 1.99017   | 0.00215 | 0.0355296 |
| NM_080927.3    | 131566      | DCBLD2       | 6093  | 37.247   | 22.1248  | 0.751464  | 0.00215 | 0.0355296 |
| NM_198565.1    | 375387      | LRRC33       | 2465  | 4.4759   | 1.98077  | 1.17611   | 0.00215 | 0.0355296 |
| NM_138803.3    | 130940      | CCDC148      | 2846  | 2.53612  | 5.89906  | -1.21786  | 0.00215 | 0.0355296 |
| NM_173496.3    | 143098      | MPP7         | 5207  | 8.74615  | 14.9401  | -0.772473 | 0.0022  | 0.0361165 |
| NM_014265.4    | 10863       | ADAM28       | 3220  | 63.022   | 125.277  | -0.99119  | 0.0022  | 0.0361165 |
| XM_003118518.1 | 728763      | LOC728763    | 4773  | 0.625649 | 1.4462   | -1.20885  | 0.0022  | 0.0361165 |
| NM_001004354.2 | 441478      | NRARP        | 2621  | 7.36206  | 3.67157  | 1.00371   | 0.0022  | 0.0361165 |
| NM_001098844.1 | 653567      | TMEM236      | 5464  | 1.63113  | 0.718203 | 1.18341   | 0.00225 | 0.0367046 |
| NM_024989.3    | 80055       | PGAP1        | 11113 | 11.8049  | 7.09943  | 0.73361   | 0.00225 | 0.0367046 |
| NM_014600.2    | 30845       | EHD3         | 3906  | 9.27172  | 5.02788  | 0.882886  | 0.00225 | 0.0367046 |
| NM_007350.3    | 22822       | PHLDA1       | 5913  | 26.4457  | 14.7214  | 0.845114  | 0.00225 | 0.0367046 |
| NM_144577.3    | 93233       | CCDC114      | 3220  | 2.15727  | 4.41656  | -1.03371  | 0.00225 | 0.0367046 |
| NM_001031737.2 | 124093      | CCDC78       | 1611  | 6.69397  | 15.979   | -1.25524  | 0.00225 | 0.0367046 |
| NM_002334.3    | 4038        | LRP4         | 8227  | 2.85108  | 1.47768  | 0.948174  | 0.00225 | 0.0367046 |
| TCONS_00233526 | XLOC_020559 | -            | 4976  | 2.17561  | 6.07835  | -1.48226  | 0.00225 | 0.0367046 |
| NM_002638.3    | 5266        | PI3          | 554   | 16.116   | 36.0191  | -1.16027  | 0.0023  | 0.0373663 |
| NM_005737.3    | 10123       | ARL4C        | 4009  | 27.1432  | 15.888   | 0.772659  | 0.0023  | 0.0373663 |
| NM_030761.4    | 54361       | WNT4         | 3905  | 3.66618  | 1.6174   | 1.1806    | 0.0023  | 0.0373663 |
| NM_178026.2    | 2686        | GGT7         | 2640  | 9.17513  | 4.77749  | 0.941476  | 0.0023  | 0.0373663 |
| NM_002842.3    | 5794        | PTPRH        | 3928  | 0.708407 | 1.981    | -1.48358  | 0.0023  | 0.0373663 |
| NM_001100168.1 | 1234        | CCR5         | 3426  | 7.5715   | 13.9056  | -0.87702  | 0.00235 | 0.0379132 |
| NM_001042517.1 | 81624       | DIAPH3       | 4802  | 1.42367  | 0.438841 | 1.69785   | 0.00235 | 0.0379132 |
| NM_021961.5    | 7003        | TEAD1        | 9416  | 37.4153  | 22.1059  | 0.759199  | 0.00235 | 0.0379132 |
| NM_147175.3    | 90161       | HS6ST2       | 4447  | 1.47508  | 0.563872 | 1.38736   | 0.00235 | 0.0379132 |

|                |             |              |       |          |          |           |         |           |
|----------------|-------------|--------------|-------|----------|----------|-----------|---------|-----------|
| NM_005906.4    | 4117        | MAK          | 3883  | 2.38789  | 5.42875  | -1.18488  | 0.00235 | 0.0379132 |
| XM_002342862.3 | 100288562   | LOC100288562 | 2186  | 0.161353 | 1.12857  | -2.8062   | 0.00235 | 0.0379132 |
| NM_004557.3    | 4855        | NOTCH4       | 6745  | 4.15963  | 1.47085  | 1.49981   | 0.00235 | 0.0379132 |
| NM_000859.2    | 3156        | HMGCR        | 4582  | 27.5603  | 16.3859  | 0.750138  | 0.00235 | 0.0379132 |
| NM_006727.3    | 1008        | CDH10        | 3436  | 0.245975 | 0.808953 | -1.71754  | 0.0024  | 0.03848   |
| NM_001206602.1 | 1123        | CHN1         | 2294  | 18.4304  | 9.52727  | 0.95195   | 0.0024  | 0.03848   |
| NM_198524.1    | 374618      | TEX9         | 1414  | 20.4018  | 43.6845  | -1.09843  | 0.0024  | 0.03848   |
| NM_002942.4    | 6092        | ROBO2        | 8689  | 6.2952   | 11.0496  | -0.811666 | 0.0024  | 0.03848   |
| NM_000906.3    | 4881        | NPR1         | 4185  | 1.53132  | 0.647642 | 1.24151   | 0.00245 | 0.039114  |
| NM_004688.2    | 9111        | NMI          | 1479  | 18.6303  | 32.464   | -0.801186 | 0.00245 | 0.039114  |
| TCONS_00253855 | XLOC_021286 | -            | 1437  | 0.466937 | 1.90201  | -2.02623  | 0.00245 | 0.039114  |
| NM_005064.3    | 6368        | CCL23        | 625   | 11.2966  | 0.43818  | 4.68822   | 0.00245 | 0.039114  |
| TCONS_00293640 | XLOC_025525 | -            | 6270  | 0.942857 | 1.99941  | -1.08446  | 0.0025  | 0.0397144 |
| NM_182762.3    | 346389      | MACC1        | 9159  | 10.892   | 18.9415  | -0.798287 | 0.0025  | 0.0397144 |
| NM_152618.2    | 166379      | BBS12        | 3244  | 3.99097  | 7.46331  | -0.903075 | 0.0025  | 0.0397144 |
| NM_001007237.1 | 3321        | IGSF3        | 7193  | 12.3143  | 7.04323  | 0.806029  | 0.0025  | 0.0397144 |
| TCONS_00282969 | XLOC_023780 | -            | 3213  | 0.921909 | 2.33462  | -1.34049  | 0.00255 | 0.0402995 |
| NM_182628.2    | 348807      | CCDC37       | 2086  | 3.32923  | 6.85021  | -1.04096  | 0.00255 | 0.0402995 |
| NM_014585.5    | 30061       | SLC40A1      | 3355  | 56.4694  | 94.243   | -0.738915 | 0.00255 | 0.0402995 |
| NM_002864.2    | 5858        | PZP          | 4610  | 2.85142  | 5.29491  | -0.892925 | 0.00255 | 0.0402995 |
| NM_014734.3    | 9766        | KIAA0247     | 5393  | 20.1116  | 12.1758  | 0.724014  | 0.00255 | 0.0402995 |
| NM_003948.3    | 8999        | CDKL2        | 4715  | 0.666814 | 1.60176  | -1.2643   | 0.0026  | 0.040888  |
| NM_006927.3    | 6483        | ST3GAL2      | 4450  | 7.49506  | 4.22032  | 0.828588  | 0.0026  | 0.040888  |
| NM_004996.3    | 4363        | ABCC1        | 6564  | 12.9786  | 5.78362  | 1.16609   | 0.0026  | 0.040888  |
| NM_020840.1    | 57600       | FNIP2        | 5790  | 16.1555  | 9.85943  | 0.712449  | 0.0026  | 0.040888  |
| NM_000953.2    | 5729        | PTGDR        | 2942  | 3.84594  | 7.42563  | -0.949176 | 0.0026  | 0.040888  |
| NM_001163.3    | 320         | APBA1        | 6584  | 2.69559  | 1.38685  | 0.958787  | 0.0026  | 0.040888  |
| NM_181078.2    | 50615       | IL21R        | 4849  | 0.554021 | 1.66878  | -1.59078  | 0.0026  | 0.040888  |
| NM_021149.2    | 23406       | COTL1        | 1827  | 63.6715  | 38.2875  | 0.733776  | 0.00265 | 0.0415288 |
| NM_207315.2    | 129607      | CMPK2        | 2989  | 4.32456  | 8.05664  | -0.897624 | 0.00265 | 0.0415288 |
| NM_015668.3    | 26166       | RGS22        | 4184  | 9.38407  | 16.2235  | -0.789802 | 0.00265 | 0.0415288 |
| NM_001010923.2 | 387357      | THEMIS       | 3866  | 5.29007  | 10.8968  | -1.04255  | 0.00265 | 0.0415288 |
| NM_000165.3    | 2697        | GJA1         | 3130  | 139.442  | 73.3788  | 0.926234  | 0.00265 | 0.0415288 |
| NM_001845.4    | 1282        | COL4A1       | 6532  | 64.9969  | 36.4203  | 0.835628  | 0.00265 | 0.0415288 |
| NM_001018071.3 | 143162      | FRMPD2       | 5024  | 2.91976  | 5.3588   | -0.876058 | 0.00265 | 0.0415288 |
| NM_024848.1    | 79906       | MORN1        | 1641  | 3.20908  | 7.16748  | -1.15931  | 0.00265 | 0.0415288 |
| TCONS_00162172 | XLOC_013545 | -            | 4119  | 1.45705  | 3.04982  | -1.06567  | 0.0027  | 0.0421065 |
| NM_020338.3    | 57178       | ZMIZ1        | 7555  | 9.65556  | 5.78874  | 0.73811   | 0.0027  | 0.0421065 |
| NM_001039360.2 | 201501      | ZBTB7C       | 4171  | 9.32096  | 5.19378  | 0.843694  | 0.0027  | 0.0421065 |
| NM_000499.3    | 1543        | CYP1A1       | 2608  | 0.804333 | 0.195615 | 2.03978   | 0.0027  | 0.0421065 |
| NM_001860.2    | 1318        | SLC31A2      | 1774  | 11.1569  | 20.5591  | -0.881846 | 0.00275 | 0.0426687 |
| NM_000219.3    | 3753        | KCNE1        | 3321  | 3.96127  | 8.12652  | -1.03667  | 0.00275 | 0.0426687 |
| NM_001024858.2 | 6710        | SPTB         | 10064 | 1.02183  | 0.472656 | 1.11229   | 0.00275 | 0.0426687 |
| NM_001235.3    | 871         | SERPINH1     | 2276  | 33.9003  | 20.2393  | 0.744137  | 0.00275 | 0.0426687 |
| NM_025257.2    | 80736       | SLC44A4      | 2634  | 23.7482  | 39.8072  | -0.74521  | 0.00275 | 0.0426687 |
| NM_001005852.2 | 246126      | CYorf15A     | 865   | 30.3339  | 12.2601  | 1.30696   | 0.00275 | 0.0426687 |
| NM_031415.2    | 56169       | GSDMC        | 2714  | 6.78051  | 3.47065  | 0.966185  | 0.0028  | 0.0432452 |
| NM_152362.2    | 126282      | TNFAIP8L1    | 3817  | 6.40115  | 11.0429  | -0.786715 | 0.0028  | 0.0432452 |
| NM_002185.2    | 3575        | IL7R         | 1805  | 23.3234  | 39.8655  | -0.773364 | 0.0028  | 0.0432452 |
| NM_002304.2    | 3955        | LFNG         | 2058  | 9.81878  | 2.57536  | 1.93077   | 0.00285 | 0.0437663 |
| NM_006666.1    | 10856       | RUVBL2       | 1488  | 23.5467  | 39.3669  | -0.741457 | 0.00285 | 0.0437663 |
| NM_005257.3    | 2627        | GATA6        | 3494  | 2.16634  | 0.939303 | 1.20559   | 0.00285 | 0.0437663 |
| NM_003247.2    | 7058        | THBS2        | 5809  | 60.2475  | 28.9329  | 1.05819   | 0.00285 | 0.0437663 |
| NM_021804.2    | 59272       | ACE2         | 3507  | 0.801197 | 1.92579  | -1.26522  | 0.00285 | 0.0437663 |

|                |             |          |       |           |          |           |         |           |
|----------------|-------------|----------|-------|-----------|----------|-----------|---------|-----------|
| NM_002609.3    | 5159        | PDGFRB   | 5714  | 52.8063   | 29.6801  | 0.831216  | 0.00285 | 0.0437663 |
| NM_017576.1    | 55582       | KIF27    | 4653  | 13.1358   | 21.4201  | -0.705461 | 0.00285 | 0.0437663 |
| NM_001100396.1 | 129852      | C2orf73  | 1921  | 1.18375   | 3.07481  | -1.37714  | 0.00285 | 0.0437663 |
| NM_000517.4    | 3040        | HBA2     | 605   | 10.664    | 3.43494  | 1.6344    | 0.00285 | 0.0437663 |
| NM_004341.3    | 790         | CAD      | 7108  | 5.55905   | 3.2114   | 0.791636  | 0.0029  | 0.0443924 |
| NM_014767.2    | 9806        | SPOCK2   | 5329  | 6.28743   | 10.7684  | -0.776267 | 0.0029  | 0.0443924 |
| NM_001145112.1 | 197135      | PATL2    | 1951  | 1.94132   | 4.33907  | -1.16035  | 0.0029  | 0.0443924 |
| NM_007038.3    | 11096       | ADAMTS5  | 9663  | 1.9889    | 3.5609   | -0.840268 | 0.00295 | 0.0449329 |
| NM_005932.3    | 4285        | MIPEP    | 2429  | 11.4719   | 19.5843  | -0.771597 | 0.00295 | 0.0449329 |
| NM_138770.1    | 90557       | CCDC74A  | 1457  | 4.02284   | 8.61669  | -1.09892  | 0.00295 | 0.0449329 |
| NM_030820.3    | 81578       | COL21A1  | 4173  | 4.14476   | 7.64131  | -0.882531 | 0.00295 | 0.0449329 |
| NM_152628.3    | 169166      | SNX31    | 2457  | 1.96772   | 0.637447 | 1.62615   | 0.003   | 0.0454886 |
| NM_152572.2    | 158067      | AK8      | 2106  | 2.24374   | 4.83351  | -1.10717  | 0.003   | 0.0454886 |
| NM_201526.1    | 3671        | ISLR     | 2111  | 22.2926   | 11.1724  | 0.996621  | 0.003   | 0.0454886 |
| NM_172069.3    | 130271      | PLEKHH2  | 6954  | 10.0027   | 6.13902  | 0.704304  | 0.003   | 0.0454886 |
| NM_178565.4    | 340419      | RSPO2    | 3149  | 0.0520553 | 2.6254   | -5.65635  | 0.00305 | 0.04606   |
| NM_012293.1    | 7837        | PXDN     | 6821  | 12.625    | 7.4627   | 0.75851   | 0.00305 | 0.04606   |
| NM_138812.2    | 143241      | DYDC1    | 750   | 3.545     | 9.47133  | -1.41778  | 0.00305 | 0.04606   |
| NM_152588.1    | 160335      | TMTC2    | 4840  | 48.6985   | 29.6731  | 0.714723  | 0.00305 | 0.04606   |
| NM_000100.2    | 1476        | CSTB     | 658   | 71.8356   | 122.62   | -0.771421 | 0.00305 | 0.04606   |
| NM_018438.5    | 26270       | FBXO6    | 1551  | 4.2878    | 8.73924  | -1.02727  | 0.00305 | 0.04606   |
| NM_002818.2    | 5721        | PSME2    | 829   | 84.6246   | 139.51   | -0.721222 | 0.0031  | 0.0465955 |
| NM_020796.3    | 57556       | SEMA6A   | 6860  | 6.81346   | 3.99973  | 0.768485  | 0.0031  | 0.0465955 |
| NM_020877.2    | 146754      | DNAH2    | 13505 | 3.60199   | 5.95256  | -0.724718 | 0.0031  | 0.0465955 |
| NM_018286.2    | 55273       | TMEM100  | 1755  | 11.2743   | 20.2749  | -0.846664 | 0.00315 | 0.0471261 |
| NM_016118.3    | 51667       | NUB1     | 3107  | 27.8474   | 45.1508  | -0.69721  | 0.00315 | 0.0471261 |
| NM_148962.4    | 165140      | OXER1    | 1763  | 2.3293    | 0.854166 | 1.44731   | 0.00315 | 0.0471261 |
| NM_021179.1    | 57821       | C1orf114 | 1866  | 5.01895   | 20.4473  | -2.02645  | 0.00315 | 0.0471261 |
| NM_001142946.1 | 29125       | C11orf21 | 2262  | 4.95623   | 2.33754  | 1.08426   | 0.00315 | 0.0471261 |
| NM_181780.3    | 151888      | BTLA     | 3215  | 1.85134   | 4.18572  | -1.17691  | 0.00315 | 0.0471261 |
| TCONS_00314309 | XLOC_026611 | -        | 1578  | 2.22171   | 0.297276 | 2.90179   | 0.00315 | 0.0471261 |
| NM_002518.3    | 4862        | NPAS2    | 4004  | 4.09487   | 2.13194  | 0.941654  | 0.0032  | 0.0476939 |
| NM_001144960.1 | 389161      | ANKUB1   | 2476  | 10.4254   | 17.9464  | -0.783587 | 0.0032  | 0.0476939 |
| NM_032821.2    | 54768       | HYDIN    | 15685 | 3.15632   | 5.70957  | -0.855141 | 0.0032  | 0.0476939 |
| NM_001098843.3 | 645090      | CXorf30  | 2863  | 3.5013    | 6.73563  | -0.943923 | 0.0032  | 0.0476939 |
| NM_001333.3    | 1515        | CTSL2    | 4527  | 3.73219   | 1.85689  | 1.00713   | 0.0032  | 0.0476939 |
| NM_001629.3    | 241         | ALOX5AP  | 906   | 48.3052   | 27.1364  | 0.831946  | 0.00325 | 0.0483534 |
| TCONS_00103332 | XLOC_008749 | -        | 1106  | 1.70866   | 0.175463 | 3.28363   | 0.00325 | 0.0483534 |
| NM_153498.2    | 57118       | CAMK1D   | 2242  | 15.4831   | 7.62907  | 1.02112   | 0.00325 | 0.0483534 |
| NM_001130040.1 | 6464        | SHC1     | 3481  | 19.821    | 7.86407  | 1.33368   | 0.00325 | 0.0483534 |
| NM_182906.2    | 10462       | CLEC10A  | 1771  | 16.2476   | 7.19449  | 1.17526   | 0.0033  | 0.0489028 |
| NM_000073.2    | 917         | CD3G     | 1311  | 5.76632   | 11.9662  | -1.05324  | 0.0033  | 0.0489028 |
| NM_080667.5    | 112942      | CCDC104  | 1299  | 27.5693   | 47.0665  | -0.771637 | 0.0033  | 0.0489028 |
| NM_001012502.2 | 286207      | C9orf117 | 1722  | 5.48466   | 11.108   | -1.01813  | 0.0033  | 0.0489028 |
| NM_014358.2    | 26253       | CLEC4E   | 2158  | 0.780655  | 2.06548  | -1.40372  | 0.0033  | 0.0489028 |
| NM_016523.1    | 51348       | KLRF1    | 1242  | 2.10548   | 5.05444  | -1.2634   | 0.0033  | 0.0489028 |
| NM_003245.3    | 7053        | TGM3     | 2677  | 0.373215  | 1.09897  | -1.55807  | 0.0033  | 0.0489028 |
| NM_001079878.1 | 1261        | CNGA3    | 3794  | 0.241541  | 0.738554 | -1.61244  | 0.00335 | 0.0494369 |
| NM_000328.2    | 6103        | RPGR     | 3072  | 8.51408   | 15.6435  | -0.877637 | 0.00335 | 0.0494369 |
| TCONS_00019022 | XLOC_000467 | -        | 2384  | 3.05583   | 1.29656  | 1.23687   | 0.00335 | 0.0494369 |



Table S6. The common dysregulated protein-coding genes of ECRSwNP vs CTRL and non-ECRSwNP vs CTRL.

| Transcript ID  | Gene ID | Gene name | Length | ECRSwNP FPKM | non-ECRSwNP FPKM | Ctrl FPKM | ECRSwNP vs Ctrl log <sub>2</sub> (foldchange) | ECRSwNP vs Ctrl P value | ECRSwNP vs Ctrl Q value | non-ECRSwNP vs Ctrl log <sub>2</sub> (foldchange) | non-ECRSwNP vs Ctrl P value | non-ECRSwNP vs Ctrl Q value |
|----------------|---------|-----------|--------|--------------|------------------|-----------|-----------------------------------------------|-------------------------|-------------------------|---------------------------------------------------|-----------------------------|-----------------------------|
| NM_004131.4    | 3002    | GZMB      | 927    | 8.68444      | 15.4069          | 3.68794   | 1.23562                                       | 0.00335                 | 0.0494369               | 2.06269                                           | 5.00E-05                    | 0.00170056                  |
| NM_001172624.1 | 4756    | NEO1      | 7055   | 12.1324      | 11.2077          | 20.2755   | -0.740875                                     | 0.00335                 | 0.0494369               | -0.855251                                         | 0.00085                     | 0.0176689                   |
| NM_003525.2    | 8346    | HIST1H2BI | 437    | 55.8263      | 60.0578          | 27.0655   | 1.04449                                       | 0.00335                 | 0.0494369               | 1.1499                                            | 0.0013                      | 0.0244278                   |
| NM_018990.3    | 54440   | SASH3     | 2694   | 13.8878      | 15.6595          | 7.6961    | 0.851622                                      | 0.00335                 | 0.0494369               | 1.02484                                           | 0.00065                     | 0.0142695                   |
| NM_001113490.1 | 154796  | AMOT      | 6945   | 6.57497      | 6.06735          | 12.2304   | -0.895413                                     | 0.0032                  | 0.0476939               | -1.01133                                          | 0.00055                     | 0.0124813                   |
| NM_001039350.1 | 1804    | DPP6      | 4705   | 1.16702      | 0.414929         | 3.57046   | -1.61328                                      | 0.00315                 | 0.0471261               | -3.10517                                          | 5.00E-05                    | 0.00170056                  |
| NM_003013.2    | 6423    | SFRP2     | 1990   | 139.326      | 214.651          | 83.2395   | 0.743124                                      | 0.0031                  | 0.0465955               | 1.36665                                           | 5.00E-05                    | 0.00170056                  |
| NM_004655.3    | 8313    | AXIN2     | 4234   | 12.4475      | 7.79652          | 20.4522   | -0.7164                                       | 0.0031                  | 0.0465955               | -1.39135                                          | 5.00E-05                    | 0.00170056                  |
| NM_002610.3    | 5163    | PDK1      | 4576   | 34.0586      | 43.9574          | 9.17787   | 1.89179                                       | 0.00305                 | 0.04606                 | 2.25988                                           | 0.0006                      | 0.013408                    |
| NM_020747.2    | 57507   | ZNF608    | 5645   | 8.19366      | 7.90934          | 13.5527   | -0.726                                        | 0.00305                 | 0.04606                 | -0.776951                                         | 0.00185                     | 0.0317167                   |
| NM_001001872.2 | 145407  | C14orf37  | 3082   | 4.74715      | 4.22888          | 8.73804   | -0.880247                                     | 0.00295                 | 0.0449329               | -1.04703                                          | 0.00075                     | 0.0159498                   |
| NM_001199622.1 | 135112  | NCOA7     | 4052   | 27.0207      | 36.6319          | 3.32381   | 3.02315                                       | 0.0029                  | 0.0443924               | 3.46219                                           | 0.00105                     | 0.0207193                   |
| NM_024324.3    | 79174   | CRELD2    | 1428   | 19.9681      | 21.7835          | 10.57     | 0.917727                                      | 0.00285                 | 0.0437663               | 1.04327                                           | 0.0007                      | 0.015106                    |
| NM_001172626.1 | 270     | AMPD1     | 2395   | 5.45253      | 6.33604          | 1.01457   | 2.42606                                       | 0.00275                 | 0.0426687               | 2.64271                                           | 0.0017                      | 0.0297668                   |
| NM_198391.2    | 23767   | FLRT3     | 4024   | 4.14387      | 2.97372          | 11.3487   | -1.45348                                      | 0.0027                  | 0.0421065               | -1.93219                                          | 0.0003                      | 0.00772176                  |
| NM_015932.5    | 51371   | POMP      | 1462   | 43.8595      | 51.127           | 25.9147   | 0.759119                                      | 0.0027                  | 0.0421065               | 0.980316                                          | 0.00015                     | 0.00437065                  |
| NM_000057.2    | 641     | BLM       | 4528   | 3.41435      | 3.50817          | 1.66242   | 1.03833                                       | 0.00265                 | 0.0415288               | 1.07744                                           | 0.00205                     | 0.0341961                   |
| NM_001775.2    | 952     | CD38      | 1491   | 23.3754      | 28.9395          | 12.6906   | 0.88123                                       | 0.00255                 | 0.0402995               | 1.18928                                           | 0.0002                      | 0.00554203                  |
| NM_005380.6    | 4681    | NBL1      | 2026   | 89.8563      | 88.0353          | 166.887   | -0.893183                                     | 0.00255                 | 0.0402995               | -0.92272                                          | 0.0015                      | 0.0270821                   |
| NM_002526.3    | 4907    | NT5E      | 4068   | 16.6419      | 15.2516          | 27.6155   | -0.730656                                     | 0.00255                 | 0.0402995               | -0.856522                                         | 0.00045                     | 0.0106989                   |
| NM_003937.2    | 8942    | KYNU      | 1672   | 16.7319      | 25.4138          | 6.80954   | 1.29697                                       | 0.00245                 | 0.039114                | 1.89998                                           | 0.0001                      | 0.00312189                  |
| NM_145018.3    | 220042  | C11orf82  | 3565   | 2.03961      | 2.00233          | 0.856252  | 1.25218                                       | 0.0024                  | 0.03848                 | 1.22557                                           | 0.00295                     | 0.0449329                   |
| NM_001793.4    | 1001    | CDH3      | 4276   | 15.7556      | 16.3987          | 8.94233   | 0.817145                                      | 0.00235                 | 0.0379132               | 0.874856                                          | 0.00055                     | 0.0124813                   |
| NM_006843.2    | 10993   | SDS       | 1605   | 1.22725      | 1.38941          | 0.322729  | 1.92704                                       | 0.00235                 | 0.0379132               | 2.10607                                           | 0.00105                     | 0.0207193                   |
| NM_006178.3    | 4905    | NSF       | 3983   | 29.5909      | 31.1925          | 18.1373   | 0.706195                                      | 0.0023                  | 0.0373663               | 0.782241                                          | 0.0013                      | 0.0244278                   |
| NM_001031709.2 | 55328   | RNLS      | 2416   | 5.5012       | 5.18267          | 11.2693   | -1.03457                                      | 0.0022                  | 0.0361165               | -1.12063                                          | 0.00075                     | 0.0159498                   |
| NM_002178.2    | 3489    | IGFBP6    | 966    | 45.0021      | 26.0181          | 77.1555   | -0.777777                                     | 0.00215                 | 0.0355296               | -1.56825                                          | 5.00E-05                    | 0.00170056                  |
| NM_002117.4    | 3107    | HLA-C     | 1525   | 271.276      | 386.143          | 154.551   | 0.811674                                      | 0.0021                  | 0.0348574               | 1.32105                                           | 5.00E-05                    | 0.00170056                  |
| NM_004255.3    | 9377    | COX5A     | 770    | 44.426       | 44.4846          | 23.8837   | 0.895378                                      | 0.0021                  | 0.0348574               | 0.897277                                          | 0.0021                      | 0.0348574                   |
| NM_001025266.1 | 285382  | C3orf70   | 5901   | 4.42686      | 4.33434          | 2.2555    | 0.972838                                      | 0.0021                  | 0.0348574               | 0.942364                                          | 0.0029                      | 0.0443924                   |
| NM_014752.2    | 9789    | SPCS2     | 2708   | 20.437       | 22.2905          | 11.7304   | 0.800929                                      | 0.0019                  | 0.0323187               | 0.92617                                           | 0.00035                     | 0.00869612                  |
| NM_052909.3    | 153478  | PLEKHG4B  | 11515  | 0.604714     | 0.513103         | 1.24942   | -1.04693                                      | 0.0019                  | 0.0323187               | -1.28394                                          | 0.00025                     | 0.00665625                  |
| NM_207361.4    | 341640  | FREM2     | 16163  | 3.21662      | 3.11999          | 5.68093   | -0.82058                                      | 0.00185                 | 0.0317167               | -0.864583                                         | 0.00065                     | 0.0142695                   |
| NM_000063.4    | 717     | C2        | 2838   | 15.8909      | 21.2954          | 7.39082   | 1.1044                                        | 0.0018                  | 0.0310732               | 1.52673                                           | 5.00E-05                    | 0.00170056                  |
| NM_014302.3    | 23480   | SEC61G    | 466    | 140.836      | 180.896          | 77.2675   | 0.866086                                      | 0.0018                  | 0.0310732               | 1.22723                                           | 5.00E-05                    | 0.00170056                  |
| NM_144650.2    | 137872  | ADHFE1    | 1895   | 2.5768       | 2.20059          | 5.88896   | -1.19244                                      | 0.0018                  | 0.0310732               | -1.42013                                          | 0.00025                     | 0.00665625                  |
| NM_145287.3    | 162655  | ZNF519    | 6810   | 2.33647      | 1.98114          | 4.32797   | -0.889361                                     | 0.0018                  | 0.0310732               | -1.12736                                          | 0.00035                     | 0.00869612                  |
| NM_175862.4    | 942     | CD86      | 2727   | 13.1315      | 12.8441          | 6.90471   | 0.92738                                       | 0.00175                 | 0.0304286               | 0.895448                                          | 0.0028                      | 0.0432452                   |
| NM_033119.4    | 85407   | NKD1      | 8716   | 4.78997      | 3.15174          | 8.38439   | -0.807689                                     | 0.00175                 | 0.0304286               | -1.41156                                          | 5.00E-05                    | 0.00170056                  |
| NM_001004067.3 | 408050  | NOMO3     | 4316   | 2.47637      | 2.37045          | 0.990041  | 1.32267                                       | 0.00175                 | 0.0304286               | 1.2596                                            | 0.0025                      | 0.0397144                   |
| NM_001882.3    | 1393    | CRHBP     | 1838   | 0.784935     | 0.779504         | 2.22215   | -1.50131                                      | 0.0017                  | 0.0297668               | -1.51133                                          | 0.003                       | 0.0454886                   |
| NM_001242908.1 | 284654  | RSPO1     | 2910   | 6.16402      | 5.62266          | 12.2863   | -0.995101                                     | 0.0017                  | 0.0297668               | -1.12772                                          | 0.00055                     | 0.0124813                   |
| NM_000201.2    | 3383    | ICAM1     | 3246   | 12.0421      | 11.6094          | 6.61486   | 0.864301                                      | 0.00165                 | 0.0290957               | 0.811511                                          | 0.00285                     | 0.0437663                   |
| NM_003332.3    | 7305    | TYROBP    | 591    | 29.4854      | 33.9205          | 11.7458   | 1.32786                                       | 0.00165                 | 0.0290957               | 1.53002                                           | 0.00025                     | 0.00665625                  |
| NM_001080444.1 | 150084  | IGSF5     | 2066   | 0.115253     | 0.186116         | 0.907261  | -2.97671                                      | 0.00165                 | 0.0290957               | -2.28531                                          | 0.00185                     | 0.0317167                   |
| NM_001025598.1 | 257106  | ARHGAP30  | 4425   | 15.2027      | 15.7537          | 8.74023   | 0.798581                                      | 0.00165                 | 0.0290957               | 0.849952                                          | 0.00065                     | 0.0142695                   |
| NM_001678.3    | 482     | ATP1B2    | 3332   | 0.995796     | 0.762437         | 2.46752   | -1.30914                                      | 0.0016                  | 0.0284826               | -1.69437                                          | 0.0001                      | 0.00312189                  |
| NM_021064.4    | 8969    | HIST1H2AG | 498    | 59.9713      | 66.2763          | 29.175    | 1.03954                                       | 0.0016                  | 0.0284826               | 1.18376                                           | 0.00055                     | 0.0124813                   |
| NM_032777.9    | 25960   | GPR124    | 6034   | 14.0118      | 10.73            | 24.1094   | -0.782951                                     | 0.0016                  | 0.0284826               | -1.16795                                          | 5.00E-05                    | 0.00170056                  |

|                |        |           |       |          |          |          |           |         |           |           |          |            |
|----------------|--------|-----------|-------|----------|----------|----------|-----------|---------|-----------|-----------|----------|------------|
| NM_018102.3    | 55713  | ZNF334    | 2455  | 3.58018  | 3.90401  | 8.65895  | -1.27416  | 0.0016  | 0.0284826 | -1.14923  | 0.0025   | 0.0397144  |
| NM_023073.3    | 65250  | C5orf42   | 11199 | 19.4587  | 18.5595  | 33.5119  | -0.784261 | 0.0016  | 0.0284826 | -0.852517 | 0.00095  | 0.0192772  |
| NM_004836.5    | 9451   | EIF2AK3   | 4648  | 32.2178  | 32.7705  | 19.1087  | 0.753634  | 0.00155 | 0.0278206 | 0.778173  | 0.00105  | 0.0207193  |
| NM_030627.2    | 80315  | CPEB4     | 7769  | 29.6778  | 32.7505  | 17.4491  | 0.766235  | 0.0015  | 0.0270821 | 0.908368  | 0.0002   | 0.00554203 |
| NM_002381.4    | 4148   | MATN3     | 2583  | 3.62209  | 1.41571  | 7.7199   | -1.09176  | 0.00145 | 0.0264203 | -2.44706  | 5.00E-05 | 0.00170056 |
| NM_004227.3    | 9265   | CYTH3     | 4469  | 14.1338  | 11.8152  | 23.9407  | -0.760316 | 0.00145 | 0.0264203 | -1.01882  | 5.00E-05 | 0.00170056 |
| NM_006033.2    | 9388   | LIPG      | 4141  | 0.922035 | 0.876609 | 0.292751 | 1.65515   | 0.00145 | 0.0264203 | 1.58226   | 0.002    | 0.0335868  |
| NM_001112718.1 | 22998  | LIMCH1    | 6084  | 12.8545  | 12.719   | 24.3684  | -0.922737 | 0.00145 | 0.0264203 | -0.938024 | 0.0002   | 0.00554203 |
| NM_013358.2    | 29943  | PADI1     | 3847  | 2.10339  | 2.86203  | 0.842389 | 1.32016   | 0.00145 | 0.0264203 | 1.76448   | 5.00E-05 | 0.00170056 |
| NM_181644.4    | 148808 | MFSD4     | 4088  | 8.48492  | 8.60961  | 4.50309  | 0.913987  | 0.0014  | 0.0257815 | 0.935034  | 0.0008   | 0.0168217  |
| NM_019111.4    | 3122   | HLA-DRA   | 1280  | 1019.83  | 1499.11  | 472.152  | 1.111     | 0.00135 | 0.0250595 | 1.66678   | 0.0001   | 0.00312189 |
| NM_145239.2    | 112476 | PRRT2     | 2567  | 1.63494  | 1.48518  | 3.78784  | -1.21214  | 0.00135 | 0.0250595 | -1.35074  | 0.0011   | 0.0214605  |
| XM_003118524.1 | 389197 | C4orf50   | 3184  | 0.540962 | 0.533624 | 1.56884  | -1.5361   | 0.00135 | 0.0250595 | -1.5558   | 0.001    | 0.0199964  |
| NM_006010.4    | 7873   | MANF      | 939   | 54.7061  | 68.3469  | 30.5012  | 0.842833  | 0.0013  | 0.0244278 | 1.16401   | 5.00E-05 | 0.00170056 |
| NM_178172.3    | 338328 | GPIHBP1   | 2281  | 1.90679  | 1.95069  | 4.58965  | -1.26724  | 0.0013  | 0.0244278 | -1.2344   | 0.00145  | 0.0264203  |
| NM_178554.4    | 339855 | KY        | 5704  | 0.338184 | 0.341729 | 0.912367 | -1.43181  | 0.0013  | 0.0244278 | -1.41676  | 0.0024   | 0.03848    |
| NM_002030.3    | 2359   | FPR3      | 2517  | 24.1341  | 26.7632  | 13.4726  | 0.841044  | 0.00125 | 0.02372   | 0.990223  | 0.0001   | 0.00312189 |
| NM_002970.2    | 6303   | SAT1      | 1064  | 534.363  | 1018.91  | 294.105  | 0.861489  | 0.00125 | 0.02372   | 1.79263   | 5.00E-05 | 0.00170056 |
| NM_005079.2    | 7163   | TPD52     | 3961  | 27.0348  | 32.4916  | 14.9664  | 0.853092  | 0.00125 | 0.02372   | 1.11834   | 0.0001   | 0.00312189 |
| NM_003329.2    | 7295   | TXN       | 508   | 366.501  | 349.612  | 206.195  | 0.829806  | 0.00125 | 0.02372   | 0.76174   | 0.0011   | 0.0214605  |
| NM_003793.3    | 8722   | CTSF      | 2014  | 19.3251  | 16.1762  | 34.152   | -0.821496 | 0.00125 | 0.02372   | -1.0781   | 5.00E-05 | 0.00170056 |
| NM_000379.3    | 7498   | XDH       | 5717  | 3.00296  | 6.25099  | 1.36851  | 1.13378   | 0.0012  | 0.0230244 | 2.19148   | 5.00E-05 | 0.00170056 |
| NM_001135733.1 | 94241  | TP53INP1  | 5652  | 49.9421  | 52.3853  | 23.9929  | 1.05765   | 0.0012  | 0.0230244 | 1.12655   | 0.0007   | 0.015106   |
| NM_006914.3    | 6096   | RORB      | 3604  | 6.01489  | 4.13765  | 11.2635  | -0.905046 | 0.00115 | 0.0222874 | -1.44478  | 5.00E-05 | 0.00170056 |
| NM_007210.3    | 11226  | GALNT6    | 4520  | 6.91363  | 6.94078  | 3.5889   | 0.945901  | 0.00115 | 0.0222874 | 0.951555  | 0.00135  | 0.0250595  |
| NM_032679.2    | 84765  | ZNF577    | 3096  | 6.02419  | 5.49141  | 11.5661  | -0.941061 | 0.00115 | 0.0222874 | -1.07465  | 0.0005   | 0.0116249  |
| NM_001198689.1 | 3953   | LEPR      | 5100  | 13.3861  | 16.5626  | 64.7144  | -2.27335  | 0.0011  | 0.0214605 | -1.96616  | 0.00185  | 0.0317167  |
| NM_001085384.1 | 7710   | ZNF154    | 2747  | 5.11825  | 3.6318   | 10.2001  | -0.994856 | 0.0011  | 0.0214605 | -1.48982  | 5.00E-05 | 0.00170056 |
| NM_020203.3    | 56955  | MEPE      | 2007  | 0.36773  | 0.568371 | 1.66713  | -2.18065  | 0.0011  | 0.0214605 | -1.55246  | 0.0026   | 0.040888   |
| NM_000405.4    | 2760   | GM2A      | 3690  | 33.4896  | 33.2595  | 19.6752  | 0.767332  | 0.00105 | 0.0207193 | 0.757386  | 0.0015   | 0.0270821  |
| NM_000231.2    | 6445   | SGCG      | 1655  | 0.160525 | 0.216968 | 1.60134  | -3.31841  | 0.00105 | 0.0207193 | -2.88372  | 0.0005   | 0.0116249  |
| NM_014584.1    | 30001  | ERO1L     | 3310  | 49.0854  | 62.8114  | 28.498   | 0.784432  | 0.00105 | 0.0207193 | 1.14016   | 5.00E-05 | 0.00170056 |
| NM_001129908.2 | 729085 | FAM198A   | 3433  | 1.63022  | 1.54762  | 3.76574  | -1.20787  | 0.00105 | 0.0207193 | -1.28288  | 0.00055  | 0.0124813  |
| NM_003511.2    | 8332   | HIST1H2AL | 470   | 24.9788  | 25.4854  | 8.03838  | 1.63573   | 0.001   | 0.0199964 | 1.66469   | 0.0009   | 0.0184743  |
| NM_006082.2    | 10376  | TUBA1B    | 1753  | 145.728  | 140.646  | 84.1687  | 0.79192   | 0.001   | 0.0199964 | 0.740715  | 0.002    | 0.0335868  |
| NM_006808.2    | 10952  | SEC61B    | 562   | 79.7751  | 82.3147  | 41.3159  | 0.949242  | 0.001   | 0.0199964 | 0.994454  | 0.00065  | 0.0142695  |
| NM_018058.5    | 55118  | CRTAC1    | 2713  | 0.154487 | 0.293499 | 2.46175  | -3.99413  | 0.001   | 0.0199964 | -3.06826  | 0.00115  | 0.0222874  |
| NM_025079.2    | 80149  | ZC3H12A   | 2716  | 5.504    | 6.66306  | 2.36571  | 1.21821   | 0.001   | 0.0199964 | 1.49391   | 0.0001   | 0.00312189 |
| NM_144616.3    | 126306 | JSRP1     | 1145  | 4.94652  | 6.16069  | 1.56697  | 1.65843   | 0.001   | 0.0199964 | 1.97511   | 5.00E-05 | 0.00170056 |
| NM_032991.2    | 836    | CASP3     | 2506  | 38.8253  | 41.8237  | 19.9246  | 0.962443  | 0.00095 | 0.0192772 | 1.06977   | 0.0003   | 0.00772176 |
| NM_002965.3    | 6280   | S100A9    | 577   | 31.6324  | 86.7818  | 11.6548  | 1.44047   | 0.00095 | 0.0192772 | 2.89646   | 5.00E-05 | 0.00170056 |
| NM_138554.3    | 7099   | TLR4      | 5653  | 27.102   | 29.0756  | 15.526   | 0.803715  | 0.00095 | 0.0192772 | 0.905122  | 0.0002   | 0.00554203 |
| NM_152547.4    | 153579 | BTNL9     | 3500  | 2.02779  | 1.6415   | 4.53135  | -1.16003  | 0.00095 | 0.0192772 | -1.46493  | 0.00015  | 0.00437065 |
| NM_004967.3    | 3381   | IBSP      | 1591  | 0.127051 | 0.283272 | 22.5586  | -7.47213  | 0.0009  | 0.0184743 | -6.31535  | 5.00E-05 | 0.00170056 |
| NM_000918.3    | 5034   | P4HB      | 2578  | 112.846  | 105.702  | 63.2556  | 0.835092  | 0.00085 | 0.0176689 | 0.740736  | 0.0021   | 0.0348574  |
| NM_005719.2    | 10094  | ARPC3     | 884   | 240.933  | 237.652  | 137.249  | 0.811836  | 0.00085 | 0.0176689 | 0.792055  | 0.00125  | 0.02372    |
| NM_020813.2    | 57573  | ZNF471    | 4967  | 4.51928  | 4.45557  | 8.26025  | -0.870093 | 0.00085 | 0.0176689 | -0.890575 | 0.001    | 0.0199964  |
| NM_001290.3    | 9079   | LDB2      | 2540  | 25.9535  | 28.1854  | 54.161   | -1.06133  | 0.0008  | 0.0168217 | -0.942304 | 0.0018   | 0.0310732  |
| NM_152862.1    | 10109  | ARPC2     | 1448  | 177.541  | 178.896  | 102.67   | 0.790134  | 0.0008  | 0.0168217 | 0.801107  | 0.00095  | 0.0192772  |
| NM_173535.2    | 165530 | CLEC4F    | 2475  | 0.916906 | 0.774704 | 2.46907  | -1.42912  | 0.0008  | 0.0168217 | -1.67225  | 0.0008   | 0.0168217  |
| NM_177455.3    | 168620 | BHLHA15   | 706   | 6.34898  | 6.56593  | 1.9044   | 1.73719   | 0.0008  | 0.0168217 | 1.78567   | 0.0008   | 0.0168217  |
| NM_019016.2    | 192666 | KRT24     | 1881  | 1.6991   | 1.71115  | 0.170365 | 3.31808   | 0.0008  | 0.0168217 | 3.32826   | 0.0007   | 0.015106   |
| NM_002298.4    | 3936   | LCP1      | 3790  | 105.542  | 105.497  | 54.3309  | 0.957976  | 0.00075 | 0.0159498 | 0.957356  | 0.0009   | 0.0184743  |
| NM_005408.2    | 6357   | CCL13     | 851   | 168.111  | 2.65448  | 0.321955 | 9.02834   | 0.00075 | 0.0159498 | 3.0435    | 0.0022   | 0.0361165  |

|                |        |           |      |           |          |          |           |         |            |           |          |            |
|----------------|--------|-----------|------|-----------|----------|----------|-----------|---------|------------|-----------|----------|------------|
| NM_007107.3    | 6747   | SSR3      | 3716 | 86.4506   | 83.7081  | 48.0381  | 0.847699  | 0.00075 | 0.0159498  | 0.80119   | 0.00095  | 0.0192772  |
| NM_000720.2    | 776    | CACNA1D   | 7768 | 3.50119   | 2.20781  | 8.05376  | -1.20182  | 0.0007  | 0.015106   | -1.86704  | 5.00E-05 | 0.00170056 |
| NM_002090.2    | 2921   | CXCL3     | 1159 | 2.09477   | 4.80877  | 0.313661 | 2.73951   | 0.0007  | 0.015106   | 3.93839   | 5.00E-05 | 0.00170056 |
| NM_000929.2    | 5322   | PLA2G5    | 1894 | 0.164039  | 0.413318 | 1.32441  | -3.01324  | 0.0007  | 0.015106   | -1.68003  | 0.0025   | 0.0397144  |
| NM_004864.2    | 9518   | GDF15     | 1200 | 2.14643   | 1.76635  | 0.431044 | 2.31603   | 0.0007  | 0.015106   | 2.03486   | 0.0018   | 0.0310732  |
| NM_021647.6    | 9848   | MFAP3L    | 6189 | 2.45327   | 1.97214  | 5.02428  | -1.03421  | 0.0007  | 0.015106   | -1.34915  | 0.0004   | 0.00971957 |
| NM_005022.2    | 5216   | PFN1      | 807  | 183.725   | 179.468  | 106.079  | 0.792411  | 0.00065 | 0.0142695  | 0.758591  | 0.00135  | 0.0250595  |
| NM_003026.2    | 6456   | SH3GL2    | 2728 | 0.0779284 | 0.176579 | 1.60812  | -4.36709  | 0.00065 | 0.0142695  | -3.18699  | 5.00E-05 | 0.00170056 |
| NM_006120.3    | 3108   | HLA-DMA   | 1122 | 71.571    | 105.769  | 38.8935  | 0.879847  | 0.0006  | 0.013408   | 1.44331   | 5.00E-05 | 0.00170056 |
| NM_006982.2    | 8092   | ALX1      | 1294 | 1.59448   | 1.12406  | 4.80268  | -1.59076  | 0.0006  | 0.013408   | -2.09512  | 0.0001   | 0.00312189 |
| NM_018699.2    | 11107  | PRDM5     | 2480 | 10.4146   | 8.92824  | 20.0417  | -0.944402 | 0.0006  | 0.013408   | -1.16656  | 5.00E-05 | 0.00170056 |
| NM_080489.4    | 27111  | SDCBP2    | 1581 | 4.48281   | 4.17642  | 1.00872  | 2.15187   | 0.0006  | 0.013408   | 2.04974   | 0.00065  | 0.0142695  |
| NM_014618.2    | 1620   | DBC1      | 3196 | 4.26732   | 3.7226   | 1.64308  | 1.37693   | 0.00055 | 0.0124813  | 1.17991   | 0.0027   | 0.0421065  |
| NM_004961.3    | 2564   | GABRE     | 3152 | 2.83253   | 3.25493  | 6.26439  | -1.14508  | 0.00055 | 0.0124813  | -0.944549 | 0.0028   | 0.0432452  |
| NM_017551.2    | 2894   | GRID1     | 5849 | 1.36616   | 1.07676  | 3.10595  | -1.18491  | 0.00055 | 0.0124813  | -1.52834  | 5.00E-05 | 0.00170056 |
| NM_002118.4    | 3109   | HLA-DMB   | 1397 | 58.0641   | 93.8486  | 31.0085  | 0.904982  | 0.00055 | 0.0124813  | 1.59767   | 5.00E-05 | 0.00170056 |
| NM_002372.2    | 4124   | MAN2A1    | 5128 | 32.7002   | 30.9774  | 18.5905  | 0.814736  | 0.00055 | 0.0124813  | 0.736651  | 0.00185  | 0.0317167  |
| NM_002951.3    | 6185   | RPN2      | 2508 | 95.2731   | 94.0982  | 52.148   | 0.869457  | 0.00055 | 0.0124813  | 0.851556  | 0.00055  | 0.0124813  |
| NM_014256.3    | 10331  | B3GNT3    | 2720 | 4.72058   | 6.00884  | 1.93042  | 1.29005   | 0.00055 | 0.0124813  | 1.63818   | 5.00E-05 | 0.00170056 |
| NM_015000.3    | 23012  | STK38L    | 5098 | 31.3333   | 28.6834  | 17.5419  | 0.836895  | 0.00055 | 0.0124813  | 0.709413  | 0.00295  | 0.0449329  |
| NM_031311.3    | 54504  | CPVL      | 1691 | 54.4294   | 70.0336  | 29.4203  | 0.887575  | 0.00055 | 0.0124813  | 1.25124   | 5.00E-05 | 0.00170056 |
| NM_021181.3    | 57823  | SLAMF7    | 2657 | 27.8412   | 50.9278  | 14.606   | 0.930661  | 0.00055 | 0.0124813  | 1.80189   | 5.00E-05 | 0.00170056 |
| NM_020980.3    | 366    | AQP9      | 3021 | 3.48455   | 5.48304  | 1.30761  | 1.41404   | 0.0005  | 0.0116249  | 2.06805   | 5.00E-05 | 0.00170056 |
| NM_000775.2    | 1573   | CYP2J2    | 1857 | 12.5142   | 10.2191  | 25.523   | -1.02823  | 0.0005  | 0.0116249  | -1.32053  | 5.00E-05 | 0.00170056 |
| NM_000474.3    | 7291   | TWIST1    | 1666 | 22.5829   | 19.1523  | 42.654   | -0.91745  | 0.0005  | 0.0116249  | -1.15516  | 5.00E-05 | 0.00170056 |
| NM_016021.2    | 51465  | UBE2J1    | 4342 | 57.9104   | 62.4642  | 31.4501  | 0.880758  | 0.0005  | 0.0116249  | 0.989968  | 0.00015  | 0.00437065 |
| NM_178568.2    | 146760 | RTN4RL1   | 3164 | 0.702349  | 0.922589 | 2.17195  | -1.62873  | 0.0005  | 0.0116249  | -1.23523  | 0.00325  | 0.0483534  |
| NM_001623.3    | 199    | AIF1      | 639  | 68.8854   | 89.5452  | 32.3159  | 1.09195   | 0.00045 | 0.0106989  | 1.47037   | 5.00E-05 | 0.00170056 |
| NM_001005738.1 | 2358   | FPR2      | 1913 | 2.70072   | 4.1006   | 0.818838 | 1.72169   | 0.00045 | 0.0106989  | 2.32418   | 5.00E-05 | 0.00170056 |
| NM_000441.1    | 5172   | SLC26A4   | 4930 | 2.74147   | 23.743   | 1.16855  | 1.23023   | 0.00045 | 0.0106989  | 4.34471   | 5.00E-05 | 0.00170056 |
| NM_003446.3    | 7712   | ZNF157    | 1695 | 1.71162   | 2.12303  | 4.81562  | -1.49236  | 0.00045 | 0.0106989  | -1.1816   | 0.00275  | 0.0426687  |
| NM_013231.4    | 23768  | FLRT2     | 7179 | 13.521    | 10.6433  | 25.2854  | -0.903105 | 0.00045 | 0.0106989  | -1.24836  | 5.00E-05 | 0.00170056 |
| NM_021237.3    | 58515  | SELK      | 818  | 54.368    | 60.4969  | 26.596   | 1.03155   | 0.00045 | 0.0106989  | 1.18565   | 5.00E-05 | 0.00170056 |
| NM_022475.2    | 64399  | HHIP      | 3555 | 2.48985   | 3.08747  | 0.89534  | 1.47555   | 0.00045 | 0.0106989  | 1.78592   | 5.00E-05 | 0.00170056 |
| NM_138780.2    | 94122  | SYTL5     | 4726 | 4.16459   | 4.09938  | 1.08603  | 1.93911   | 0.00045 | 0.0106989  | 1.91634   | 0.00055  | 0.0124813  |
| NM_153267.4    | 256691 | MAMDC2    | 3618 | 5.04728   | 5.48322  | 10.0174  | -0.988932 | 0.00045 | 0.0106989  | -0.869417 | 0.0031   | 0.0465955  |
| NM_001995.2    | 2180   | ACSL1     | 3805 | 28.196    | 27.8277  | 15.5685  | 0.856866  | 0.0004  | 0.00971957 | 0.837898  | 0.00035  | 0.00869612 |
| NM_001118890.1 | 2745   | GLRX      | 1079 | 30.1375   | 32.0612  | 13.2694  | 1.18346   | 0.0004  | 0.00971957 | 1.27273   | 0.0001   | 0.00312189 |
| 3507           | 3507   | -         | 1486 | 135.167   | 322.04   | 61.5317  | 1.13534   | 0.0004  | 0.00971957 | 2.38784   | 5.00E-05 | 0.00170056 |
| NM_002627.4    | 5214   | PFKP      | 2657 | 24.4175   | 24.1835  | 13.2778  | 0.878897  | 0.0004  | 0.00971957 | 0.865005  | 0.0006   | 0.013408   |
| NM_006516.2    | 6513   | SLC2A1    | 3670 | 16.4512   | 14.7054  | 8.73311  | 0.913621  | 0.0004  | 0.00971957 | 0.751778  | 0.00285  | 0.0437663  |
| NM_000343.3    | 6523   | SLC5A1    | 5061 | 2.30198   | 4.11193  | 0.800905 | 1.52317   | 0.0004  | 0.00971957 | 2.36011   | 5.00E-05 | 0.00170056 |
| NM_003816.2    | 8754   | ADAM9     | 4099 | 76.7869   | 67.2931  | 41.2413  | 0.896772  | 0.0004  | 0.00971957 | 0.70637   | 0.0033   | 0.0489028  |
| NM_130386.2    | 81035  | COLEC12   | 3134 | 31.4666   | 28.7509  | 57.4232  | -0.867811 | 0.0004  | 0.00971957 | -0.998026 | 5.00E-05 | 0.00170056 |
| NM_182658.1    | 359710 | C20orf185 | 1454 | 12.1176   | 14.108   | 3.4163   | 1.82659   | 0.0004  | 0.00971957 | 2.04601   | 5.00E-05 | 0.00170056 |
| NM_001192.2    | 608    | TNFRSF17  | 994  | 18.0928   | 21.6875  | 7.18924  | 1.33151   | 0.00035 | 0.00869612 | 1.59295   | 5.00E-05 | 0.00170056 |
| NM_001025195.1 | 1066   | CES1      | 2013 | 22.3099   | 22.0134  | 56.7756  | -1.34758  | 0.00035 | 0.00869612 | -1.36689  | 0.00125  | 0.02372    |
| NM_003383.3    | 7436   | VLDLR     | 3636 | 3.39324   | 1.9108   | 13.4397  | -1.98577  | 0.00035 | 0.00869612 | -2.81425  | 5.00E-05 | 0.00170056 |
| NM_003509.2    | 8329   | HIST1H2AI | 469  | 19.511    | 19.7312  | 4.52326  | 2.10885   | 0.00035 | 0.00869612 | 2.12505   | 0.00035  | 0.00869612 |
| NM_003564.1    | 8407   | TAGLN2    | 1360 | 136.581   | 130.903  | 73.5734  | 0.892502  | 0.00035 | 0.00869612 | 0.831245  | 0.00065  | 0.0142695  |
| NM_004675.2    | 9077   | DIRAS3    | 1631 | 7.05424   | 10.8335  | 2.58486  | 1.4484    | 0.00035 | 0.00869612 | 2.06734   | 5.00E-05 | 0.00170056 |
| NM_005100.3    | 9590   | AKAP12    | 8434 | 19.1537   | 21.3303  | 47.4702  | -1.3094   | 0.00035 | 0.00869612 | -1.15412  | 0.0013   | 0.0244278  |
| NM_001128227.2 | 10020  | GNE       | 5298 | 18.2042   | 18.5581  | 7.74155  | 1.23358   | 0.00035 | 0.00869612 | 1.26136   | 0.00155  | 0.0278206  |
| NM_007356.2    | 22798  | LAMB4     | 5858 | 1.02813   | 1.11046  | 0.274688 | 1.90415   | 0.00035 | 0.00869612 | 2.01529   | 0.00015  | 0.00437065 |

|                |           |             |       |          |          |          |           |         |            |           |          |            |
|----------------|-----------|-------------|-------|----------|----------|----------|-----------|---------|------------|-----------|----------|------------|
| NM_015364.4    | 23643     | LY96        | 622   | 31.0977  | 42.3746  | 11.2909  | 1.46165   | 0.00035 | 0.00869612 | 1.90804   | 5.00E-05 | 0.00170056 |
| NM_014331.3    | 23657     | SLC7A11     | 9648  | 1.93159  | 2.45937  | 0.862837 | 1.16263   | 0.00035 | 0.00869612 | 1.51113   | 5.00E-05 | 0.00170056 |
| NM_017424.2    | 51816     | CECR1       | 3927  | 23.899   | 23.5747  | 9.39168  | 1.34749   | 0.00035 | 0.00869612 | 1.32778   | 0.0005   | 0.0116249  |
| NM_145739.2    | 114880    | OSBPL6      | 6811  | 1.05267  | 2.65405  | 7.64767  | -2.86096  | 0.00035 | 0.00869612 | -1.52683  | 0.00035  | 0.00869612 |
| NM_152793.2    | 222166    | C7orf41     | 5814  | 16.2493  | 17.0546  | 29.7241  | -0.871254 | 0.00035 | 0.00869612 | -0.801472 | 0.001    | 0.0199964  |
| NM_000478.4    | 249       | ALPL        | 2596  | 4.1073   | 3.94506  | 9.76129  | -1.24888  | 0.0003  | 0.00772176 | -1.30702  | 5.00E-05 | 0.00170056 |
| NM_001175.4    | 397       | ARHGDI3     | 1216  | 150.498  | 145.249  | 79.4677  | 0.921303  | 0.0003  | 0.00772176 | 0.870092  | 0.00035  | 0.00869612 |
| NM_000059.3    | 675       | BRCA2       | 11386 | 5.26711  | 5.66493  | 2.76446  | 0.930012  | 0.0003  | 0.00772176 | 1.03506   | 5.00E-05 | 0.00170056 |
| NM_001199149.1 | 4057      | LTF         | 2508  | 243.987  | 485.255  | 102.844  | 1.24635   | 0.0003  | 0.00772176 | 2.23829   | 0.0001   | 0.00312189 |
| NM_003006.4    | 6404      | SELPLG      | 2573  | 15.6738  | 14.2582  | 7.42515  | 1.07787   | 0.0003  | 0.00772176 | 0.941299  | 0.00095  | 0.0192772  |
| NM_006367.3    | 10487     | CAP1        | 2773  | 98.7364  | 83.5729  | 44.2391  | 1.15826   | 0.0003  | 0.00772176 | 0.917714  | 0.00185  | 0.0317167  |
| NM_007191.4    | 11197     | WIF1        | 2240  | 0.104994 | 0.430398 | 3.76249  | -5.16331  | 0.0003  | 0.00772176 | -3.12794  | 5.00E-05 | 0.00170056 |
| NM_015900.3    | 51365     | PLA1A       | 1780  | 10.9356  | 11.4027  | 3.08154  | 1.82731   | 0.0003  | 0.00772176 | 1.88765   | 0.0002   | 0.00554203 |
| NM_016623.3    | 51571     | FAM49B      | 2196  | 41.3185  | 38.1114  | 21.7082  | 0.928544  | 0.0003  | 0.00772176 | 0.811981  | 0.0015   | 0.0270821  |
| NM_001160130.1 | 56479     | KCNQ5       | 6556  | 0.71944  | 0.604168 | 1.97105  | -1.45402  | 0.0003  | 0.00772176 | -1.70594  | 5.00E-05 | 0.00170056 |
| XM_003403521.1 | 100652860 | LOC10065286 | 1520  | 2.63232  | 3.23298  | 7.85582  | -1.57743  | 0.0003  | 0.00772176 | -1.2809   | 0.00105  | 0.0207193  |
| NM_032977.3    | 843       | CASP10      | 5906  | 8.93825  | 9.55204  | 4.33585  | 1.04368   | 0.00025 | 0.00665625 | 1.13949   | 5.00E-05 | 0.00170056 |
| NM_001289.4    | 1193      | CLIC2       | 2686  | 17.9547  | 17.2866  | 9.31415  | 0.946865  | 0.00025 | 0.00665625 | 0.89216   | 0.00065  | 0.0142695  |
| NM_005508.4    | 1233      | CCR4        | 1657  | 8.70532  | 7.70633  | 3.11228  | 1.48393   | 0.00025 | 0.00665625 | 1.30807   | 0.00095  | 0.0192772  |
| NM_000847.4    | 2940      | GSTA3       | 915   | 0.650144 | 1.26298  | 4.12801  | -2.66661  | 0.00025 | 0.00665625 | -1.70862  | 0.00125  | 0.02372    |
| NM_001097589.1 | 6707      | SPRR3       | 902   | 5.92007  | 3.49682  | 0.327627 | 4.17549   | 0.00025 | 0.00665625 | 3.41592   | 0.00225  | 0.0367046  |
| NM_014708.4    | 9735      | KNTC1       | 6965  | 13.1954  | 14.2564  | 7.32504  | 0.849129  | 0.00025 | 0.00665625 | 0.960702  | 5.00E-05 | 0.00170056 |
| NM_016235.1    | 51704     | GPCR5B      | 2845  | 27.1547  | 24.6947  | 50.93    | -0.907312 | 0.00025 | 0.00665625 | -1.04432  | 5.00E-05 | 0.00170056 |
| NM_017982.3    | 55061     | SUSD4       | 3027  | 2.39564  | 2.82254  | 6.00956  | -1.32685  | 0.00025 | 0.00665625 | -1.09027  | 0.00225  | 0.0367046  |
| NM_020848.2    | 57608     | KIAA1462    | 9300  | 11.7107  | 6.01114  | 21.0118  | -0.843376 | 0.00025 | 0.00665625 | -1.80549  | 5.00E-05 | 0.00170056 |
| NM_024817.2    | 79875     | THSD4       | 9145  | 24.1337  | 17.6737  | 46.0633  | -0.932568 | 0.00025 | 0.00665625 | -1.38202  | 5.00E-05 | 0.00170056 |
| NM_032744.3    | 84830     | C6orf105    | 1804  | 5.39781  | 5.54516  | 1.50068  | 1.84676   | 0.00025 | 0.00665625 | 1.88562   | 0.00025  | 0.00665625 |
| NM_152864.3    | 128414    | NKAIN4      | 1430  | 0.489232 | 0.66951  | 2.45336  | -2.32617  | 0.00025 | 0.00665625 | -1.87358  | 0.00055  | 0.0124813  |
| NM_153274.2    | 266675    | BEST4       | 2096  | 0.959201 | 1.20193  | 3.22982  | -1.75155  | 0.00025 | 0.00665625 | -1.4261   | 0.0008   | 0.0168217  |
| NM_001204376.1 | 4883      | NPR3        | 6380  | 4.74809  | 5.73845  | 1.65885  | 1.51716   | 0.0002  | 0.00554203 | 1.79048   | 0.0001   | 0.00312189 |
| NM_002530.2    | 4916      | NTRK3       | 2818  | 1.93064  | 1.87484  | 8.48226  | -2.13537  | 0.0002  | 0.00554203 | -1.82049  | 5.00E-05 | 0.00170056 |
| NM_005065.4    | 6400      | SEL1L       | 6579  | 81.8322  | 100.92   | 40.679   | 1.00838   | 0.0002  | 0.00554203 | 1.31086   | 5.00E-05 | 0.00170056 |
| NM_003039.2    | 6518      | SLC2A5      | 2438  | 2.47123  | 3.48966  | 0.667059 | 1.88935   | 0.0002  | 0.00554203 | 2.3872    | 5.00E-05 | 0.00170056 |
| NM_004710.3    | 9144      | SYNGR2      | 1694  | 27.0738  | 28.3693  | 13.3931  | 1.01541   | 0.0002  | 0.00554203 | 1.08284   | 5.00E-05 | 0.00170056 |
| NM_012081.5    | 22936     | ELL2        | 6046  | 47.9627  | 43.621   | 24.7787  | 0.952811  | 0.0002  | 0.00554203 | 0.815919  | 0.00095  | 0.0192772  |
| NM_031912.4    | 83849     | SYT15       | 5508  | 6.15942  | 6.28864  | 11.8717  | -0.946654 | 0.0002  | 0.00554203 | -0.9167   | 0.00035  | 0.00869612 |
| NM_032040.3    | 83987     | CCDC8       | 3334  | 2.47606  | 3.14983  | 6.2283   | -1.33079  | 0.0002  | 0.00554203 | -0.983566 | 0.00165  | 0.0290957  |
| NM_198474.3    | 283298    | OLFML1      | 2905  | 7.09282  | 7.86364  | 13.9819  | -0.97913  | 0.0002  | 0.00554203 | -0.830293 | 0.00205  | 0.0341961  |
| NM_173814.4    | 283659    | PRTG        | 11973 | 2.97784  | 2.89744  | 5.65892  | -0.926262 | 0.0002  | 0.00554203 | -0.96575  | 5.00E-05 | 0.00170056 |
| NM_001165.3    | 330       | BIRC3       | 5229  | 77.5134  | 53.0886  | 27.1518  | 1.5134    | 0.00015 | 0.00437065 | 0.967354  | 0.00035  | 0.00869612 |
| NM_001908.3    | 1508      | CTSB        | 3783  | 135.595  | 118.423  | 61.0981  | 1.15011   | 0.00015 | 0.00437065 | 0.95475   | 0.0012   | 0.0230244  |
| NM_002009.3    | 2252      | FGF7        | 3936  | 71.2442  | 72.2474  | 32.1     | 1.1502    | 0.00015 | 0.00437065 | 1.17037   | 0.0004   | 0.00971957 |
| NM_000849.4    | 2947      | GSTM3       | 4127  | 8.9259   | 7.44923  | 17.5574  | -0.97601  | 0.00015 | 0.00437065 | -1.23691  | 5.00E-05 | 0.00170056 |
| 3493           | 3493      | -           | 1061  | 1474.25  | 2466.19  | 410.424  | 1.8448    | 0.00015 | 0.00437065 | 2.5871    | 0.0001   | 0.00312189 |
| NM_002334.3    | 4038      | LRP4        | 8227  | 2.85108  | 1.47768  | 6.31228  | -1.14665  | 0.00015 | 0.00437065 | -2.09483  | 5.00E-05 | 0.00170056 |
| NM_002704.3    | 5473      | PPBP        | 1307  | 1.0146   | 0.9285   | 5.13818  | -2.34035  | 0.00015 | 0.00437065 | -2.46828  | 5.00E-05 | 0.00170056 |
| NM_006948.4    | 6782      | HSPA13      | 3987  | 35.16    | 44.7465  | 19.5935  | 0.843558  | 0.00015 | 0.00437065 | 1.1914    | 5.00E-05 | 0.00170056 |
| NM_019856.1    | 8736      | MYOM1       | 5559  | 0.915933 | 1.64154  | 3.51762  | -1.94129  | 0.00015 | 0.00437065 | -1.09955  | 0.003    | 0.0454886  |
| NM_014791.2    | 9833      | MELK        | 2439  | 3.48268  | 2.86879  | 0.952747 | 1.87003   | 0.00015 | 0.00437065 | 1.59028   | 0.00055  | 0.0124813  |
| NM_015065.2    | 23086     | EXPH5       | 10187 | 20.5618  | 22.3952  | 40.9518  | -0.993963 | 0.00015 | 0.00437065 | -0.870737 | 0.0008   | 0.0168217  |
| NM_007364.2    | 23423     | TMED3       | 1388  | 39.2003  | 37.7388  | 19.8637  | 0.98073   | 0.00015 | 0.00437065 | 0.925914  | 0.0004   | 0.00971957 |
| NM_012413.3    | 25797     | QPCT        | 1703  | 10.6364  | 9.90897  | 4.26102  | 1.31974   | 0.00015 | 0.00437065 | 1.21754   | 0.0005   | 0.0116249  |
| NM_013340.2    | 29930     | PCDHB1      | 2534  | 0.551842 | 0.775551 | 2.04343  | -1.88866  | 0.00015 | 0.00437065 | -1.3977   | 0.00235  | 0.0379132  |
| NM_020801.2    | 57561     | ARRDC3      | 4161  | 154.907  | 105.071  | 54.3784  | 1.5103    | 0.00015 | 0.00437065 | 0.950254  | 5.00E-05 | 0.00170056 |

|                |        |           |       |           |          |          |           |          |            |           |          |            |
|----------------|--------|-----------|-------|-----------|----------|----------|-----------|----------|------------|-----------|----------|------------|
| NM_020844.2    | 57604  | KIAA1456  | 9590  | 2.82762   | 3.90013  | 8.11618  | -1.52121  | 0.00015  | 0.00437065 | -1.34822  | 5.00E-05 | 0.00170056 |
| NM_024893.1    | 79953  | SYNDIG1   | 2437  | 1.91458   | 2.4692   | 0.447981 | 2.09552   | 0.00015  | 0.00437065 | 2.46254   | 5.00E-05 | 0.00170056 |
| NM_032793.3    | 84879  | MFS2A     | 2162  | 6.96654   | 6.77281  | 2.42036  | 1.52522   | 0.00015  | 0.00437065 | 1.48453   | 0.0002   | 0.00554203 |
| NM_080617.4    | 140689 | CBLN4     | 2508  | 0.125269  | 0.302009 | 4.46969  | -5.15707  | 0.00015  | 0.00437065 | -3.88751  | 5.00E-05 | 0.00170056 |
| NM_001136482.1 | 255809 | C19orf38  | 1089  | 4.53113   | 3.26357  | 0.9874   | 2.19817   | 0.00015  | 0.00437065 | 1.72474   | 0.00205  | 0.0341961  |
| NM_001134363.1 | 282996 | RBM20     | 7233  | 1.92979   | 2.37751  | 4.45379  | -1.20659  | 0.00015  | 0.00437065 | -0.905582 | 0.0013   | 0.0244278  |
| NM_178527.3    | 284525 | SLC9A11   | 4427  | 0.874666  | 1.10057  | 3.02734  | -1.79125  | 0.00015  | 0.00437065 | -1.45979  | 5.00E-05 | 0.00170056 |
| NM_001747.2    | 822    | CAPG      | 1442  | 36.599    | 32.8522  | 17.5555  | 1.05988   | 0.0001   | 0.00312189 | 0.904069  | 0.0006   | 0.013408   |
| NM_001142699.1 | 1740   | DLG2      | 8046  | 0.732339  | 0.822409 | 2.50481  | -1.77412  | 0.0001   | 0.00312189 | -1.60678  | 0.0027   | 0.0421065  |
| NM_006207.2    | 5157   | PDGFRL    | 1905  | 5.0509    | 5.04637  | 12.6782  | -1.32774  | 0.0001   | 0.00312189 | -1.32904  | 5.00E-05 | 0.00170056 |
| NM_021965.3    | 5239   | PGM5      | 3338  | 5.3593    | 5.92989  | 11.5312  | -1.10542  | 0.0001   | 0.00312189 | -0.959459 | 0.00085  | 0.0176689  |
| NM_173054.2    | 5649   | RELN      | 11565 | 0.71523   | 0.083582 | 2.0522   | -1.52069  | 0.0001   | 0.00312189 | -4.61784  | 5.00E-05 | 0.00170056 |
| NM_005080.3    | 7494   | XBP1      | 1820  | 443.071   | 436.087  | 168.768  | 1.39249   | 0.0001   | 0.00312189 | 1.36957   | 0.00055  | 0.0124813  |
| NM_006762.2    | 7805   | LAPTM5    | 2240  | 98.3309   | 93.036   | 45.4328  | 1.11391   | 0.0001   | 0.00312189 | 1.03405   | 0.0002   | 0.00554203 |
| NM_003637.3    | 8515   | ITGA10    | 5170  | 1.76991   | 0.969669 | 4.08453  | -1.20649  | 0.0001   | 0.00312189 | -2.0746   | 5.00E-05 | 0.00170056 |
| NM_032960.2    | 9261   | MAPKAPK2  | 3052  | 27.0919   | 25.1577  | 13.431   | 1.0123    | 0.0001   | 0.00312189 | 0.905433  | 0.0009   | 0.0184743  |
| NM_004267.3    | 9435   | CHST2     | 3043  | 5.30288   | 4.15804  | 1.83738  | 1.52913   | 0.0001   | 0.00312189 | 1.17825   | 0.00115  | 0.0222874  |
| NM_005763.3    | 10157  | AAST      | 5871  | 21.2372   | 21.0205  | 40.6068  | -0.935128 | 0.0001   | 0.00312189 | -0.949921 | 5.00E-05 | 0.00170056 |
| NM_021982.1    | 10802  | SEC24A    | 6387  | 24.0523   | 22.5906  | 12.7041  | 0.920878  | 0.0001   | 0.00312189 | 0.830426  | 0.00035  | 0.00869612 |
| NM_007035.3    | 11081  | KERA      | 2533  | 0.236443  | 0.404639 | 1.56337  | -2.7251   | 0.0001   | 0.00312189 | -1.94996  | 0.0003   | 0.00772176 |
| NM_012128.3    | 22802  | CLCA4     | 3213  | 3.14861   | 9.70005  | 0.856218 | 1.87867   | 0.0001   | 0.00312189 | 3.50194   | 5.00E-05 | 0.00170056 |
| NM_012450.2    | 26266  | SLC13A4   | 2896  | 0.323442  | 0.459755 | 1.41974  | -2.13405  | 0.0001   | 0.00312189 | -1.62669  | 0.001    | 0.0199964  |
| NM_019609.4    | 56265  | CPXM1     | 2400  | 30.893    | 34.8521  | 62.6989  | -1.02116  | 0.0001   | 0.00312189 | -0.847192 | 0.0006   | 0.013408   |
| NM_173050.3    | 80274  | SCUBE1    | 3868  | 0.409544  | 0.462918 | 1.63163  | -1.99422  | 0.0001   | 0.00312189 | -1.81749  | 0.00015  | 0.00437065 |
| NM_032855.2    | 84941  | HSH2D     | 2367  | 9.8204    | 9.39671  | 4.01723  | 1.28958   | 0.0001   | 0.00312189 | 1.22595   | 0.00015  | 0.00437065 |
| NM_080596.1    | 85235  | HIST1H2AH | 439   | 40.0337   | 34.9728  | 13.0957  | 1.61213   | 0.0001   | 0.00312189 | 1.41714   | 0.00075  | 0.0159498  |
| NM_001130058.1 | 204962 | SLC44A5   | 3894  | 0.0925231 | 0.334828 | 1.35922  | -3.87682  | 0.0001   | 0.00312189 | -2.02128  | 0.0007   | 0.015106   |
| NM_207365.3    | 344752 | AADACL2   | 1500  | 2.46449   | 2.54804  | 7.16366  | -1.53941  | 0.0001   | 0.00312189 | -1.49131  | 0.0001   | 0.00312189 |
| NM_001085.4    | 12     | SERPINA3  | 1590  | 469.152   | 89.048   | 14.9471  | 4.97211   | 5.00E-05 | 0.00170056 | 2.57471   | 5.00E-05 | 0.00170056 |
| NM_020546.2    | 108    | ADCY2     | 6553  | 2.7012    | 4.16552  | 9.7531   | -1.85226  | 5.00E-05 | 0.00170056 | -1.22736  | 5.00E-05 | 0.00170056 |
| NM_001124.1    | 133    | ADM       | 1449  | 21.7287   | 10.1365  | 2.81998  | 2.94584   | 5.00E-05 | 0.00170056 | 1.8458    | 5.00E-05 | 0.00170056 |
| NM_000681.3    | 150    | ADRA2A    | 3876  | 23.6584   | 14.3173  | 8.47532  | 1.48102   | 5.00E-05 | 0.00170056 | 0.756424  | 0.00325  | 0.0483534  |
| NM_000694.2    | 221    | ALDH3B1   | 2815  | 12.1305   | 13.9328  | 37.5336  | -1.62955  | 5.00E-05 | 0.00170056 | -1.4297   | 5.00E-05 | 0.00170056 |
| NM_000698.2    | 240    | ALOX5     | 2554  | 21.4268   | 13.8077  | 6.86329  | 1.64244   | 5.00E-05 | 0.00170056 | 1.0085    | 0.0007   | 0.015106   |
| NM_001629.3    | 241    | ALOX5AP   | 906   | 48.3052   | 27.1364  | 13.3778  | 1.85234   | 5.00E-05 | 0.00170056 | 1.0204    | 0.00135  | 0.0250595  |
| NM_001152.4    | 292    | SLC25A5   | 1351  | 99.3271   | 79.9183  | 45.4862  | 1.12676   | 5.00E-05 | 0.00170056 | 0.813096  | 0.0007   | 0.015106   |
| NM_000044.2    | 367    | AR        | 4314  | 0.790178  | 1.22889  | 3.04562  | -1.94649  | 5.00E-05 | 0.00170056 | -1.30938  | 0.002    | 0.035868   |
| NM_004319.1    | 460    | ASTN1     | 7314  | 1.72593   | 1.88765  | 4.67112  | -1.43639  | 5.00E-05 | 0.00170056 | -1.30718  | 0.00015  | 0.00437065 |
| NM_000702.3    | 477    | ATP1A2    | 5464  | 6.65188   | 8.24277  | 38.7615  | -2.54279  | 5.00E-05 | 0.00170056 | -2.23342  | 5.00E-05 | 0.00170056 |
| NM_001692.3    | 525    | ATP6V1B1  | 1939  | 1.13725   | 1.94418  | 6.22053  | -2.45149  | 5.00E-05 | 0.00170056 | -1.67788  | 0.0002   | 0.00554203 |
| NM_004049.3    | 597    | BCL2A1    | 887   | 63.1543   | 14.7406  | 4.45226  | 3.82627   | 5.00E-05 | 0.00170056 | 1.72719   | 0.00055  | 0.0124813  |
| NM_001198.3    | 639    | PRDM1     | 5165  | 32.3901   | 24.887   | 7.43687  | 2.12278   | 5.00E-05 | 0.00170056 | 1.74262   | 5.00E-05 | 0.00170056 |
| NM_021073.2    | 653    | BMP5      | 2172  | 27.5571   | 28.3511  | 9.13111  | 1.59356   | 5.00E-05 | 0.00170056 | 1.63454   | 5.00E-05 | 0.00170056 |
| NM_000061.2    | 695    | BTK       | 2611  | 22.4299   | 12.1575  | 6.12768  | 1.87201   | 5.00E-05 | 0.00170056 | 0.988437  | 0.00075  | 0.0159498  |
| NM_000065.2    | 729    | C6        | 3606  | 3.27154   | 5.57945  | 21.8203  | -2.73763  | 5.00E-05 | 0.00170056 | -1.96747  | 5.00E-05 | 0.00170056 |
| NM_001218.3    | 771    | CA12      | 3975  | 21.661    | 27.1506  | 3.83575  | 2.49752   | 5.00E-05 | 0.00170056 | 2.8234    | 5.00E-05 | 0.00170056 |
| NM_000616.4    | 920    | CD4       | 3116  | 19.5486   | 14.5046  | 7.53192  | 1.37598   | 5.00E-05 | 0.00170056 | 0.945418  | 0.0019   | 0.0323187  |
| NM_001781.2    | 969    | CD69      | 1676  | 260.814   | 25.6891  | 14.1771  | 4.20138   | 5.00E-05 | 0.00170056 | 0.857589  | 0.0025   | 0.0397144  |
| NM_001783.3    | 973    | CD79A     | 1258  | 33.8568   | 62.0491  | 10.9739  | 1.62537   | 5.00E-05 | 0.00170056 | 2.49933   | 5.00E-05 | 0.00170056 |
| NM_001254.3    | 990    | CDC6      | 3053  | 2.98069   | 2.2121   | 0.813722 | 1.87304   | 5.00E-05 | 0.00170056 | 1.44281   | 0.0008   | 0.0168217  |
| NM_001792.3    | 1000   | CDH2      | 4367  | 1.61473   | 2.49161  | 5.61369  | -1.79766  | 5.00E-05 | 0.00170056 | -1.17187  | 0.0005   | 0.0116249  |
| NM_004065.2    | 1038   | CDR1      | 1299  | 8.47655   | 3.38912  | 40.7513  | -2.2653   | 5.00E-05 | 0.00170056 | -3.58786  | 5.00E-05 | 0.00170056 |
| NM_004363.2    | 1048   | CEACAM5   | 3600  | 41.1753   | 12.0636  | 0.671976 | 5.93723   | 5.00E-05 | 0.00170056 | 4.16611   | 5.00E-05 | 0.00170056 |
| NM_005507.2    | 1072   | CFL1      | 1260  | 183.278   | 147.256  | 85.6049  | 1.09827   | 5.00E-05 | 0.00170056 | 0.782559  | 0.00105  | 0.0207193  |

|                |      |          |       |          |          |          |          |          |            |           |          |            |
|----------------|------|----------|-------|----------|----------|----------|----------|----------|------------|-----------|----------|------------|
| NM_001814.4    | 1075 | CTSC     | 1907  | 359.574  | 147.917  | 63.5718  | 2.49983  | 5.00E-05 | 0.00170056 | 1.21833   | 5.00E-05 | 0.00170056 |
| NM_001854.3    | 1301 | COL11A1  | 7291  | 6.26187  | 12.5191  | 32.4633  | -2.37415 | 5.00E-05 | 0.00170056 | -1.37468  | 0.0003   | 0.00772176 |
| NM_000494.3    | 1308 | COL17A1  | 5610  | 6.47481  | 6.93792  | 1.50136  | 2.10857  | 5.00E-05 | 0.00170056 | 2.20823   | 5.00E-05 | 0.00170056 |
| NM_001870.2    | 1359 | CPA3     | 1686  | 264.984  | 74.1552  | 36.5306  | 2.85873  | 5.00E-05 | 0.00170056 | 1.02144   | 5.00E-05 | 0.00170056 |
| NM_000573.3    | 1378 | CR1      | 8616  | 13.4739  | 6.72801  | 1.75544  | 2.94027  | 5.00E-05 | 0.00170056 | 1.93835   | 5.00E-05 | 0.00170056 |
| NM_001884.3    | 1404 | HAPLN1   | 4678  | 1.84705  | 0.565044 | 6.04425  | -1.71034 | 5.00E-05 | 0.00170056 | -3.41913  | 5.00E-05 | 0.00170056 |
| NM_000395.2    | 1439 | CSF2RB   | 4848  | 21.9423  | 12.4538  | 3.70911  | 2.56457  | 5.00E-05 | 0.00170056 | 1.74744   | 5.00E-05 | 0.00170056 |
| NM_001321.1    | 1466 | CSRP2    | 901   | 68.4496  | 107.577  | 290.382  | -2.08484 | 5.00E-05 | 0.00170056 | -1.43258  | 5.00E-05 | 0.00170056 |
| NM_005213.3    | 1475 | CSTA     | 828   | 43.2697  | 39.4759  | 10.0048  | 2.11267  | 5.00E-05 | 0.00170056 | 1.98029   | 5.00E-05 | 0.00170056 |
| NM_001911.2    | 1511 | CTSG     | 924   | 46.5036  | 19.4127  | 6.01945  | 2.94964  | 5.00E-05 | 0.00170056 | 1.6893    | 5.00E-05 | 0.00170056 |
| NM_000396.3    | 1513 | CTSK     | 1810  | 46.1817  | 58.0294  | 127.079  | -1.46033 | 5.00E-05 | 0.00170056 | -1.13087  | 0.0005   | 0.0116249  |
| NM_000101.2    | 1535 | CYBA     | 688   | 162.801  | 235.814  | 76.725   | 1.08534  | 5.00E-05 | 0.00170056 | 1.61988   | 5.00E-05 | 0.00170056 |
| NM_000397.3    | 1536 | CYBB     | 4318  | 72.5272  | 96.4217  | 32.2032  | 1.17132  | 5.00E-05 | 0.00170056 | 1.58215   | 5.00E-05 | 0.00170056 |
| NM_000766.3    | 1553 | CYP2A13  | 1747  | 5.61842  | 4.96824  | 19.9971  | -1.83156 | 5.00E-05 | 0.00170056 | -2.00899  | 5.00E-05 | 0.00170056 |
| NM_001099772.1 | 1580 | CYP4B1   | 2158  | 41.2942  | 45.0329  | 128.138  | -1.63369 | 5.00E-05 | 0.00170056 | -1.50865  | 0.0002   | 0.00554203 |
| NM_000574.3    | 1604 | CD55     | 2796  | 68.7664  | 94.4863  | 21.4055  | 1.68372  | 5.00E-05 | 0.00170056 | 2.14212   | 5.00E-05 | 0.00170056 |
| NM_001369.2    | 1767 | DNAH5    | 15573 | 14.6696  | 34.1222  | 86.2259  | -2.55529 | 5.00E-05 | 0.00170056 | -1.33741  | 0.00015  | 0.00437065 |
| NM_001372.3    | 1770 | DNAH9    | 13750 | 6.92764  | 11.576   | 24.7797  | -1.83872 | 5.00E-05 | 0.00170056 | -1.09802  | 5.00E-05 | 0.00170056 |
| NM_004944.2    | 1776 | DNASE1L3 | 1463  | 5.40095  | 10.271   | 19.5908  | -1.85889 | 5.00E-05 | 0.00170056 | -0.931603 | 0.00145  | 0.0264203  |
| NM_024422.3    | 1824 | DSC2     | 5199  | 12.3131  | 6.96374  | 2.49327  | 2.30409  | 5.00E-05 | 0.00170056 | 1.48182   | 5.00E-05 | 0.00170056 |
| NM_001944.2    | 1830 | DSG3     | 5551  | 4.54055  | 3.93888  | 1.05254  | 2.10899  | 5.00E-05 | 0.00170056 | 1.9039    | 5.00E-05 | 0.00170056 |
| NM_000112.3    | 1836 | SLC26A2  | 8075  | 56.1722  | 71.5924  | 22.1299  | 1.34386  | 5.00E-05 | 0.00170056 | 1.69381   | 5.00E-05 | 0.00170056 |
| NM_004417.3    | 1843 | DUSP1    | 2024  | 356.027  | 53.0246  | 27.4142  | 3.69899  | 5.00E-05 | 0.00170056 | 0.951737  | 0.0002   | 0.00554203 |
| NM_004419.3    | 1847 | DUSP5    | 2528  | 51.4685  | 9.9697   | 3.02362  | 4.08934  | 5.00E-05 | 0.00170056 | 1.72127   | 5.00E-05 | 0.00170056 |
| NM_001974.3    | 2015 | EMR1     | 3123  | 19.6724  | 1.82071  | 0.317868 | 5.95161  | 5.00E-05 | 0.00170056 | 2.518     | 5.00E-05 | 0.00170056 |
| NM_001428.3    | 2023 | ENO1     | 2187  | 172.998  | 134.316  | 74.8777  | 1.20815  | 5.00E-05 | 0.00170056 | 0.843021  | 0.00105  | 0.0207193  |
| NM_005233.5    | 2042 | EPHA3    | 5809  | 0.591364 | 1.05007  | 6.61111  | -3.48277 | 5.00E-05 | 0.00170056 | -2.65441  | 5.00E-05 | 0.00170056 |
| NM_000130.4    | 2153 | F5       | 9179  | 5.81776  | 4.60575  | 2.19784  | 1.40438  | 5.00E-05 | 0.00170056 | 1.06735   | 0.00035  | 0.00869612 |
| NM_000129.3    | 2162 | F13A1    | 3863  | 283.732  | 145.465  | 50.3977  | 2.4931   | 5.00E-05 | 0.00170056 | 1.52924   | 5.00E-05 | 0.00170056 |
| NM_001442.2    | 2167 | FABP4    | 838   | 4.04084  | 3.9004   | 34.3176  | -3.08622 | 5.00E-05 | 0.00170056 | -3.13725  | 5.00E-05 | 0.00170056 |
| NM_004106.1    | 2207 | FCER1G   | 591   | 56.3504  | 51.6052  | 20.4269  | 1.46396  | 5.00E-05 | 0.00170056 | 1.33705   | 5.00E-05 | 0.00170056 |
| NM_002003.3    | 2219 | FCN1     | 1283  | 17.2839  | 30.9812  | 3.82727  | 2.17504  | 5.00E-05 | 0.00170056 | 3.01701   | 5.00E-05 | 0.00170056 |
| NM_002010.2    | 2254 | FGF9     | 4530  | 0.735149 | 1.26164  | 3.95586  | -2.42788 | 5.00E-05 | 0.00170056 | -1.64869  | 5.00E-05 | 0.00170056 |
| NM_005252.3    | 2353 | FOS      | 2158  | 486.04   | 44.4     | 7.21553  | 6.07382  | 5.00E-05 | 0.00170056 | 2.62138   | 5.00E-05 | 0.00170056 |
| NM_002029.3    | 2357 | FPR1     | 1317  | 15.3973  | 17.3148  | 2.93228  | 2.39258  | 5.00E-05 | 0.00170056 | 2.56191   | 5.00E-05 | 0.00170056 |
| NM_002046.3    | 2597 | GAPDH    | 1310  | 738.082  | 579.618  | 290.794  | 1.34379  | 5.00E-05 | 0.00170056 | 0.995108  | 0.0007   | 0.015106   |
| NM_145793.3    | 2674 | GFRA1    | 9134  | 8.34266  | 7.77643  | 27.8384  | -1.7385  | 5.00E-05 | 0.00170056 | -1.8399   | 5.00E-05 | 0.00170056 |
| NM_004004.5    | 2706 | GJB2     | 2334  | 14.2501  | 14.811   | 5.78519  | 1.30054  | 5.00E-05 | 0.00170056 | 1.35624   | 5.00E-05 | 0.00170056 |
| NM_006142.3    | 2810 | SFN      | 1315  | 29.6634  | 13.6089  | 6.7159   | 2.14303  | 5.00E-05 | 0.00170056 | 1.01889   | 0.00215  | 0.0355296  |
| NM_005290.1    | 2838 | GPR15    | 1083  | 5.75576  | 2.71639  | 0.753787 | 2.93278  | 5.00E-05 | 0.00170056 | 1.84946   | 0.0027   | 0.0421065  |
| NM_005306.2    | 2867 | FFAR2    | 2053  | 9.19102  | 1.82213  | 0.522918 | 4.13557  | 5.00E-05 | 0.00170056 | 1.80097   | 0.00125  | 0.02372    |
| NM_002089.3    | 2920 | CXCL2    | 1205  | 67.4621  | 6.53973  | 1.4232   | 5.56687  | 5.00E-05 | 0.00170056 | 2.20009   | 5.00E-05 | 0.00170056 |
| NM_000851.3    | 2949 | GSTM5    | 1570  | 0.357057 | 2.35722  | 7.12814  | -4.3193  | 5.00E-05 | 0.00170056 | -1.59644  | 0.00015  | 0.00437065 |
| NM_005322.2    | 3009 | HIST1H1B | 790   | 61.894   | 55.6771  | 20.4327  | 1.59892  | 5.00E-05 | 0.00170056 | 1.4462    | 5.00E-05 | 0.00170056 |
| NM_005328.2    | 3037 | HAS2     | 3275  | 6.21144  | 4.18533  | 1.47874  | 2.07056  | 5.00E-05 | 0.00170056 | 1.50097   | 0.00015  | 0.00437065 |
| NM_001172129.1 | 3055 | HCK      | 2155  | 14.9061  | 9.49841  | 4.50093  | 1.72761  | 5.00E-05 | 0.00170056 | 1.07746   | 0.0022   | 0.0361165  |
| NM_005337.4    | 3071 | NCKAP1L  | 3893  | 32.9666  | 29.9674  | 15.6878  | 1.07136  | 5.00E-05 | 0.00170056 | 0.933746  | 0.0001   | 0.00312189 |
| NM_001530.3    | 3091 | HIF1A    | 4059  | 109.259  | 69.53    | 37.4411  | 1.54506  | 5.00E-05 | 0.00170056 | 0.893015  | 0.00025  | 0.00665625 |
| NM_000189.4    | 3099 | HK2      | 7093  | 13.488   | 7.87652  | 2.62488  | 2.36135  | 5.00E-05 | 0.00170056 | 1.58531   | 5.00E-05 | 0.00170056 |
| NM_002133.2    | 3162 | HMOX1    | 1590  | 19.0023  | 11.0675  | 4.10273  | 2.21152  | 5.00E-05 | 0.00170056 | 1.43167   | 5.00E-05 | 0.00170056 |
| NM_002162.3    | 3385 | ICAM3    | 1780  | 19.6828  | 18.9177  | 7.05418  | 1.48038  | 5.00E-05 | 0.00170056 | 1.42319   | 5.00E-05 | 0.00170056 |
| NM_000598.4    | 3486 | IGFBP3   | 2613  | 203.466  | 365.724  | 71.5229  | 1.50831  | 5.00E-05 | 0.00170056 | 2.35428   | 5.00E-05 | 0.00170056 |
| NM_001554.4    | 3491 | CYR61    | 2295  | 110.679  | 33.3372  | 13.7271  | 3.01128  | 5.00E-05 | 0.00170056 | 1.2801    | 5.00E-05 | 0.00170056 |
| 3494           | 3494 | -        | 1019  | 726.672  | 766.09   | 93.4102  | 2.95965  | 5.00E-05 | 0.00170056 | 3.03586   | 5.00E-05 | 0.00170056 |

|                |      |          |       |          |          |          |          |          |            |          |          |            |
|----------------|------|----------|-------|----------|----------|----------|----------|----------|------------|----------|----------|------------|
| 3501           | 3501 | -        | 980   | 488.109  | 753.4    | 85.1202  | 2.51963  | 5.00E-05 | 0.00170056 | 3.14584  | 5.00E-05 | 0.00170056 |
| 3503           | 3503 | -        | 983   | 3703.86  | 173.058  | 21.8126  | 7.40772  | 5.00E-05 | 0.00170056 | 2.98802  | 5.00E-05 | 0.00170056 |
| 3505           | 3505 | -        | 1188  | 11.741   | 2.29208  | 0.520062 | 4.49673  | 5.00E-05 | 0.00170056 | 2.1399   | 0.00075  | 0.0159498  |
| 3538           | 3538 | -        | 320   | 2118.9   | 1653.31  | 391.077  | 2.43779  | 5.00E-05 | 0.00170056 | 2.07984  | 5.00E-05 | 0.00170056 |
| 3539           | 3539 | -        | 318   | 646.944  | 996.829  | 166.569  | 1.95752  | 5.00E-05 | 0.00170056 | 2.58122  | 5.00E-05 | 0.00170056 |
| NM_000576.2    | 3553 | IL1B     | 1498  | 3.1396   | 3.9513   | 0.462931 | 2.76171  | 5.00E-05 | 0.00170056 | 3.09346  | 5.00E-05 | 0.00170056 |
| NM_000417.2    | 3559 | IL2RA    | 3216  | 5.75801  | 3.33699  | 1.52618  | 1.91564  | 5.00E-05 | 0.00170056 | 1.12862  | 0.00275  | 0.0426687  |
| NM_000584.3    | 3576 | IL8      | 1705  | 17.5023  | 34.9818  | 4.72844  | 1.88811  | 5.00E-05 | 0.00170056 | 2.88717  | 5.00E-05 | 0.00170056 |
| NM_001558.3    | 3587 | IL10RA   | 3656  | 24.6936  | 23.2529  | 8.54456  | 1.53106  | 5.00E-05 | 0.00170056 | 1.44433  | 5.00E-05 | 0.00170056 |
| NM_002460.3    | 3662 | IRF4     | 5327  | 10.6825  | 16.4181  | 3.36478  | 1.66667  | 5.00E-05 | 0.00170056 | 2.2867   | 5.00E-05 | 0.00170056 |
| NM_000211.3    | 3689 | ITGB2    | 2958  | 37.2093  | 27.7845  | 12.9395  | 1.52388  | 5.00E-05 | 0.00170056 | 1.10249  | 0.0001   | 0.00312189 |
| NM_002229.2    | 3726 | JUNB     | 1816  | 148.001  | 27.4683  | 12.9681  | 3.51257  | 5.00E-05 | 0.00170056 | 1.0828   | 5.00E-05 | 0.00170056 |
| NM_000217.2    | 3736 | KCNA1    | 7983  | 0.253352 | 0.525153 | 2.53179  | -3.32095 | 5.00E-05 | 0.00170056 | -2.26935 | 5.00E-05 | 0.00170056 |
| NM_004522.1    | 3800 | KIF5C    | 6933  | 4.06583  | 2.5609   | 0.995353 | 2.03027  | 5.00E-05 | 0.00170056 | 1.36337  | 0.0001   | 0.00312189 |
| NM_002266.2    | 3838 | KPNA2    | 1980  | 20.5454  | 15.3342  | 7.89084  | 1.38057  | 5.00E-05 | 0.00170056 | 0.958505 | 0.00085  | 0.0176689  |
| NM_005554.3    | 3853 | KRT6A    | 2450  | 21.7183  | 12.5934  | 1.69885  | 3.67628  | 5.00E-05 | 0.00170056 | 2.89004  | 5.00E-05 | 0.00170056 |
| NM_153490.2    | 3860 | KRT13    | 1715  | 3.097    | 6.46307  | 0.675297 | 2.19728  | 5.00E-05 | 0.00170056 | 3.25863  | 5.00E-05 | 0.00170056 |
| NM_000526.4    | 3861 | KRT14    | 1636  | 5.29778  | 9.3015   | 0.611884 | 3.11406  | 5.00E-05 | 0.00170056 | 3.92613  | 5.00E-05 | 0.00170056 |
| NM_002275.3    | 3866 | KRT15    | 1840  | 114.291  | 84.4943  | 40.1227  | 1.51021  | 5.00E-05 | 0.00170056 | 1.07443  | 5.00E-05 | 0.00170056 |
| NM_005566.3    | 3939 | LDHA     | 2208  | 234.909  | 195.49   | 77.9652  | 1.5912   | 5.00E-05 | 0.00170056 | 1.32619  | 5.00E-05 | 0.00170056 |
| NM_001198557.1 | 4001 | LMNB1    | 2250  | 17.5965  | 13.3513  | 6.30134  | 1.48156  | 5.00E-05 | 0.00170056 | 1.08324  | 0.00225  | 0.0367046  |
| NM_005582.2    | 4064 | CD180    | 2716  | 11.7325  | 9.4064   | 3.95623  | 1.56831  | 5.00E-05 | 0.00170056 | 1.24951  | 0.00015  | 0.00437065 |
| NM_000239.2    | 4069 | LYZ      | 1516  | 905.233  | 1996.13  | 199.578  | 2.18134  | 5.00E-05 | 0.00170056 | 3.32218  | 0.0024   | 0.03848    |
| NM_000528.3    | 4125 | MAN2B1   | 3224  | 31.3591  | 26.2749  | 14.3094  | 1.13192  | 5.00E-05 | 0.00170056 | 0.876721 | 0.0009   | 0.0184743  |
| NM_012328.2    | 4189 | DNAJB9   | 2538  | 39.975   | 59.0113  | 18.8914  | 1.08136  | 5.00E-05 | 0.00170056 | 1.64326  | 5.00E-05 | 0.00170056 |
| NM_004994.2    | 4318 | MMP9     | 2336  | 0.916865 | 4.45143  | 14.5385  | -3.98702 | 5.00E-05 | 0.00170056 | -1.70753 | 5.00E-05 | 0.00170056 |
| NM_002427.3    | 4322 | MMP13    | 2719  | 0.874896 | 0.879573 | 159.113  | -7.50672 | 5.00E-05 | 0.00170056 | -7.49903 | 5.00E-05 | 0.00170056 |
| NM_002432.1    | 4332 | MNDA     | 1667  | 31.3812  | 39.4322  | 13.1432  | 1.25559  | 5.00E-05 | 0.00170056 | 1.58506  | 5.00E-05 | 0.00170056 |
| NM_002457.2    | 4583 | MUC2     | 8623  | 1.39396  | 1.72799  | 0.208277 | 2.74262  | 5.00E-05 | 0.00170056 | 3.05252  | 5.00E-05 | 0.00170056 |
| NM_000615.6    | 4684 | NCAM1    | 5962  | 1.0277   | 2.3043   | 5.78442  | -2.49275 | 5.00E-05 | 0.00170056 | -1.32784 | 0.0004   | 0.00971957 |
| NM_000631.4    | 4689 | NCF4     | 1398  | 13.9908  | 9.52919  | 3.12951  | 2.16047  | 5.00E-05 | 0.00170056 | 1.60641  | 0.0015   | 0.0270821  |
| NM_002514.3    | 4856 | NOV      | 2601  | 5.74545  | 6.88939  | 34.4704  | -2.58487 | 5.00E-05 | 0.00170056 | -2.32291 | 5.00E-05 | 0.00170056 |
| NM_001007156.1 | 4916 | NTRK3    | 3982  | 1.92985  | 1.84269  | 6.62195  | -1.77877 | 5.00E-05 | 0.00170056 | -2.20263 | 0.00025  | 0.00665625 |
| NM_000275.2    | 4948 | OCA2     | 3140  | 0.380531 | 0.665624 | 1.91235  | -2.32926 | 5.00E-05 | 0.00170056 | -1.52257 | 0.00125  | 0.02372    |
| NM_000602.3    | 5054 | SERPINE1 | 3181  | 22.7471  | 4.26985  | 0.726664 | 4.96825  | 5.00E-05 | 0.00170056 | 2.55482  | 5.00E-05 | 0.00170056 |
| NM_002578.3    | 5063 | PAK3     | 2754  | 1.69967  | 1.90389  | 6.02646  | -1.82606 | 5.00E-05 | 0.00170056 | -1.66236 | 5.00E-05 | 0.00170056 |
| NM_000922.3    | 5140 | PDE3B    | 6091  | 8.94566  | 9.26319  | 2.87868  | 1.63578  | 5.00E-05 | 0.00170056 | 1.6861   | 5.00E-05 | 0.00170056 |
| NM_001037339.1 | 5142 | PDE4B    | 3876  | 20.0895  | 13.6349  | 4.28492  | 2.2291   | 5.00E-05 | 0.00170056 | 1.66997  | 5.00E-05 | 0.00170056 |
| NM_000442.4    | 5175 | PECAM1   | 4449  | 36.6826  | 25.6531  | 13.0084  | 1.49566  | 5.00E-05 | 0.00170056 | 0.979693 | 5.00E-05 | 0.00170056 |
| NM_001146187.1 | 5178 | PEG3     | 8375  | 2.35229  | 2.27494  | 5.29089  | -1.16944 | 5.00E-05 | 0.00170056 | -1.21769 | 0.00045  | 0.0106989  |
| NM_000291.3    | 5230 | PGK1     | 2423  | 107.952  | 97.5128  | 57.1127  | 0.918506 | 5.00E-05 | 0.00170056 | 0.77178  | 0.0013   | 0.0244278  |
| NM_002648.3    | 5292 | PIM1     | 2709  | 31.7851  | 11.6142  | 6.26396  | 2.34321  | 5.00E-05 | 0.00170056 | 0.890749 | 0.00205  | 0.0341961  |
| NM_002649.2    | 5294 | PIK3CG   | 5379  | 18.0233  | 12.7896  | 7.36006  | 1.29208  | 5.00E-05 | 0.00170056 | 0.797184 | 0.00195  | 0.0329693  |
| NM_000930.3    | 5327 | PLAT     | 3173  | 5.84999  | 13.9735  | 28.5812  | -2.28856 | 5.00E-05 | 0.00170056 | -1.03237 | 0.0001   | 0.00312189 |
| NM_002658.3    | 5328 | PLAU     | 2378  | 9.93527  | 5.91869  | 2.54705  | 1.96373  | 5.00E-05 | 0.00170056 | 1.21645  | 0.00165  | 0.0290957  |
| NM_002661.2    | 5336 | PLCG2    | 4241  | 21.303   | 16.7802  | 8.93604  | 1.25335  | 5.00E-05 | 0.00170056 | 0.909057 | 0.00025  | 0.00665625 |
| NM_002664.2    | 5341 | PLEK     | 2852  | 35.5301  | 31.5762  | 12.9319  | 1.45811  | 5.00E-05 | 0.00170056 | 1.2879   | 5.00E-05 | 0.00170056 |
| NM_199478.1    | 5354 | PLP1     | 2921  | 2.1592   | 4.03874  | 8.45052  | -1.96854 | 5.00E-05 | 0.00170056 | -1.06513 | 0.00165  | 0.0290957  |
| NM_006235.2    | 5450 | POU2AF1  | 3032  | 9.76899  | 9.3752   | 3.01664  | 1.69526  | 5.00E-05 | 0.00170056 | 1.6359   | 5.00E-05 | 0.00170056 |
| NM_002725.3    | 5549 | PRELP    | 5820  | 0.70576  | 1.29927  | 4.20122  | -2.57356 | 5.00E-05 | 0.00170056 | -1.69311 | 5.00E-05 | 0.00170056 |
| NM_002727.2    | 5552 | SRGN     | 1254  | 600.399  | 222.297  | 112.672  | 2.41379  | 5.00E-05 | 0.00170056 | 0.980361 | 0.0001   | 0.00312189 |
| NM_000949.5    | 5618 | PRLR     | 11817 | 4.6013   | 3.93311  | 15.3758  | -1.74054 | 5.00E-05 | 0.00170056 | -1.96692 | 5.00E-05 | 0.00170056 |
| NM_000313.3    | 5627 | PROS1    | 3580  | 22.5316  | 20.8197  | 60.5745  | -1.42676 | 5.00E-05 | 0.00170056 | -1.54076 | 5.00E-05 | 0.00170056 |
| NM_000963.2    | 5743 | PTGS2    | 4493  | 41.232   | 15.1943  | 2.13877  | 4.26891  | 5.00E-05 | 0.00170056 | 2.82868  | 5.00E-05 | 0.00170056 |

|                |      |          |       |          |          |          |          |          |            |           |          |            |
|----------------|------|----------|-------|----------|----------|----------|----------|----------|------------|-----------|----------|------------|
| NM_198964.1    | 5744 | PTHLH    | 1854  | 12.9291  | 11.2623  | 0.810568 | 3.99554  | 5.00E-05 | 0.00170056 | 3.79642   | 5.00E-05 | 0.00170056 |
| NM_001184744.1 | 5745 | PTH1R    | 1991  | 1.98806  | 1.56498  | 6.44491  | -1.6968  | 5.00E-05 | 0.00170056 | -2.04202  | 5.00E-05 | 0.00170056 |
| NM_002825.5    | 5764 | PTN      | 1549  | 15.0362  | 33.1337  | 60.3928  | -2.00594 | 5.00E-05 | 0.00170056 | -0.866077 | 0.00055  | 0.0124813  |
| NM_002864.2    | 5858 | PZP      | 4610  | 2.85142  | 5.29491  | 10.6603  | -1.90249 | 5.00E-05 | 0.00170056 | -1.00957  | 0.0003   | 0.00772176 |
| NM_006743.4    | 5935 | RBM3     | 4432  | 83.635   | 68.2714  | 32.7683  | 1.35181  | 5.00E-05 | 0.00170056 | 1.05898   | 5.00E-05 | 0.00170056 |
| NM_002922.3    | 5996 | RGS1     | 1403  | 201.782  | 67.9109  | 19.2747  | 3.38802  | 5.00E-05 | 0.00170056 | 1.81694   | 5.00E-05 | 0.00170056 |
| NM_002923.3    | 5997 | RGS2     | 1350  | 282.433  | 49.8778  | 16.1875  | 4.12495  | 5.00E-05 | 0.00170056 | 1.62351   | 5.00E-05 | 0.00170056 |
| NM_002934.2    | 6036 | RNASE2   | 735   | 13.7152  | 7.39762  | 1.89386  | 2.85638  | 5.00E-05 | 0.00170056 | 1.96573   | 0.00155  | 0.0278206  |
| NM_006269.1    | 6101 | RP1      | 7100  | 6.13558  | 8.64943  | 18.6022  | -1.6002  | 5.00E-05 | 0.00170056 | -1.1048   | 5.00E-05 | 0.00170056 |
| NM_001036.3    | 6263 | RYR3     | 15559 | 0.794222 | 0.556124 | 2.2559   | -1.50609 | 5.00E-05 | 0.00170056 | -2.02023  | 5.00E-05 | 0.00170056 |
| NM_005978.3    | 6273 | S100A2   | 963   | 129.743  | 90.9409  | 23.2854  | 2.47816  | 5.00E-05 | 0.00170056 | 1.9655    | 5.00E-05 | 0.00170056 |
| NM_005980.2    | 6286 | S100P    | 510   | 43.0612  | 53.9113  | 5.77578  | 2.8983   | 5.00E-05 | 0.00170056 | 3.2225    | 5.00E-05 | 0.00170056 |
| NM_002974.2    | 6318 | SERPINB4 | 1719  | 103.029  | 94.5907  | 3.23896  | 4.99138  | 5.00E-05 | 0.00170056 | 4.86809   | 5.00E-05 | 0.00170056 |
| NM_004588.4    | 6327 | SCN2B    | 4922  | 0.499338 | 0.610597 | 1.60203  | -1.68181 | 5.00E-05 | 0.00170056 | -1.39161  | 0.00105  | 0.0207193  |
| NM_002976.3    | 6332 | SCN7A    | 7186  | 0.456659 | 1.61744  | 3.11981  | -2.77227 | 5.00E-05 | 0.00170056 | -0.947749 | 0.002    | 0.0335868  |
| NM_002982.3    | 6347 | CCL2     | 749   | 116.617  | 61.4655  | 27.8862  | 2.06415  | 5.00E-05 | 0.00170056 | 1.14022   | 0.00015  | 0.00437065 |
| NM_005623.2    | 6355 | CCL8     | 1250  | 8.91826  | 6.99974  | 1.16458  | 2.93696  | 5.00E-05 | 0.00170056 | 2.5875    | 5.00E-05 | 0.00170056 |
| NM_002986.2    | 6356 | CCL11    | 925   | 26.4263  | 10.2261  | 2.42561  | 3.44556  | 5.00E-05 | 0.00170056 | 2.07584   | 5.00E-05 | 0.00170056 |
| NM_002988.2    | 6362 | CCL18    | 770   | 279.754  | 3.92204  | 0.653166 | 8.74249  | 5.00E-05 | 0.00170056 | 2.58608   | 0.0011   | 0.0214605  |
| NM_002997.4    | 6382 | SDC1     | 3201  | 64.9469  | 56.1283  | 26.6973  | 1.28257  | 5.00E-05 | 0.00170056 | 1.07203   | 5.00E-05 | 0.00170056 |
| NM_000450.2    | 6401 | SELE     | 3875  | 15.0178  | 3.73904  | 1.0889   | 3.78573  | 5.00E-05 | 0.00170056 | 1.7798    | 5.00E-05 | 0.00170056 |
| NM_000655.4    | 6402 | SELL     | 2442  | 23.0295  | 22.236   | 7.72278  | 1.57629  | 5.00E-05 | 0.00170056 | 1.5257    | 5.00E-05 | 0.00170056 |
| NM_003014.3    | 6424 | SFRP4    | 2974  | 7.14851  | 25.1784  | 153.406  | -4.42357 | 5.00E-05 | 0.00170056 | -2.60709  | 5.00E-05 | 0.00170056 |
| NM_003037.2    | 6504 | SLAMF1   | 2001  | 8.36112  | 6.94837  | 3.22793  | 1.37309  | 5.00E-05 | 0.00170056 | 1.10607   | 0.0013   | 0.0244278  |
| NM_006931.2    | 6515 | SLC2A3   | 3938  | 64.4682  | 11.5063  | 6.6203   | 3.28362  | 5.00E-05 | 0.00170056 | 0.797461  | 0.00275  | 0.0426687  |
| NM_006933.4    | 6526 | SLC5A3   | 11576 | 95.1134  | 61.8618  | 28.0502  | 1.76164  | 5.00E-05 | 0.00170056 | 1.14104   | 0.0001   | 0.00312189 |
| NM_001008539.3 | 6542 | SLC7A2   | 7571  | 20.0817  | 27.3407  | 81.1648  | -2.01497 | 5.00E-05 | 0.00170056 | -1.5698   | 5.00E-05 | 0.00170056 |
| NM_001046.2    | 6558 | SLC12A2  | 6860  | 58.2409  | 55.2115  | 26.3532  | 1.14405  | 5.00E-05 | 0.00170056 | 1.06699   | 0.0002   | 0.00554203 |
| NM_001040058.1 | 6696 | SPP1     | 1625  | 23.5519  | 13.1633  | 102.889  | -2.12717 | 5.00E-05 | 0.00170056 | -2.9665   | 5.00E-05 | 0.00170056 |
| NM_006280.2    | 6748 | SSR4     | 725   | 199.183  | 253.8    | 78.1322  | 1.35011  | 5.00E-05 | 0.00170056 | 1.6997    | 5.00E-05 | 0.00170056 |
| NM_003155.2    | 6781 | STC1     | 3877  | 19.4096  | 10.8552  | 6.10944  | 1.66766  | 5.00E-05 | 0.00170056 | 0.829278  | 0.00205  | 0.0341961  |
| NM_001062.3    | 6947 | TCN1     | 1567  | 227.086  | 59.922   | 24.9139  | 3.18821  | 5.00E-05 | 0.00170056 | 1.26613   | 0.0008   | 0.0168217  |
| NM_005651.2    | 6999 | TDO2     | 1693  | 4.21725  | 3.39385  | 0.56747  | 2.89369  | 5.00E-05 | 0.00170056 | 2.58031   | 5.00E-05 | 0.00170056 |
| NM_003226.3    | 7033 | TFF3     | 1054  | 104.977  | 64.5205  | 17.8191  | 2.55858  | 5.00E-05 | 0.00170056 | 1.85634   | 5.00E-05 | 0.00170056 |
| NM_001128148.1 | 7037 | TFRC     | 5083  | 39.0907  | 43.4388  | 15.7885  | 1.30795  | 5.00E-05 | 0.00170056 | 1.46011   | 5.00E-05 | 0.00170056 |
| NM_003248.4    | 7060 | THBS4    | 3223  | 1.12346  | 0.367177 | 10.474   | -3.22079 | 5.00E-05 | 0.00170056 | -4.83419  | 5.00E-05 | 0.00170056 |
| NM_175610.2    | 7082 | TJP1     | 6925  | 17.6747  | 13.7364  | 54.4488  | -1.62321 | 5.00E-05 | 0.00170056 | -1.98689  | 5.00E-05 | 0.00170056 |
| NM_006290.2    | 7128 | TNFAIP3  | 4432  | 54.1129  | 26.7074  | 15.3184  | 1.82071  | 5.00E-05 | 0.00170056 | 0.801976  | 0.00135  | 0.0250595  |
| NM_007115.3    | 7130 | TNFAIP6  | 1424  | 10.3747  | 8.50815  | 1.43809  | 2.85083  | 5.00E-05 | 0.00170056 | 2.56469   | 5.00E-05 | 0.00170056 |
| NM_001067.3    | 7153 | TOP2A    | 5753  | 14.6506  | 10.5628  | 4.72787  | 1.63169  | 5.00E-05 | 0.00170056 | 1.15972   | 0.00015  | 0.00437065 |
| NM_003357.4    | 7356 | SCGB1A1  | 452   | 48.8071  | 20.9764  | 2998.95  | -5.94122 | 5.00E-05 | 0.00170056 | -7.15955  | 5.00E-05 | 0.00170056 |
| NM_007153.3    | 7757 | ZNF208   | 9088  | 2.41327  | 1.8439   | 6.95137  | -1.52631 | 5.00E-05 | 0.00170056 | -1.91454  | 5.00E-05 | 0.00170056 |
| NM_013250.2    | 7762 | ZNF215   | 3658  | 8.10533  | 10.744   | 2.64557  | 1.61529  | 5.00E-05 | 0.00170056 | 2.02188   | 5.00E-05 | 0.00170056 |
| NM_014518.2    | 7772 | ZNF229   | 4964  | 0.80532  | 1.40975  | 2.9793   | -1.88734 | 5.00E-05 | 0.00170056 | -1.07953  | 0.0012   | 0.0230244  |
| NM_003463.3    | 7803 | PTP4A1   | 5082  | 42.6519  | 35.7465  | 18.4763  | 1.20693  | 5.00E-05 | 0.00170056 | 0.952128  | 5.00E-05 | 0.00170056 |
| NM_006763.2    | 7832 | BTG2     | 2712  | 210.617  | 76.3341  | 46.769   | 2.171    | 5.00E-05 | 0.00170056 | 0.706773  | 0.00335  | 0.0494369  |
| NM_003469.4    | 7857 | SCG2     | 2572  | 88.0674  | 83.0054  | 20.8374  | 2.07944  | 5.00E-05 | 0.00170056 | 1.99403   | 5.00E-05 | 0.00170056 |
| NM_003537.3    | 8358 | HIST1H3B | 472   | 50.0093  | 38.4051  | 15.5455  | 1.6857   | 5.00E-05 | 0.00170056 | 1.3048    | 0.0023   | 0.0373663  |
| NM_003608.3    | 8477 | GPR65    | 4522  | 18.477   | 9.4031   | 4.10697  | 2.16958  | 5.00E-05 | 0.00170056 | 1.19506   | 5.00E-05 | 0.00170056 |
| NM_003613.3    | 8483 | CILP     | 4468  | 0.386228 | 0.455992 | 1.67811  | -2.11931 | 5.00E-05 | 0.00170056 | -1.87976  | 0.0001   | 0.00312189 |
| NM_003619.3    | 8492 | PRSS12   | 4573  | 11.6658  | 14.7944  | 27.5263  | -1.23853 | 5.00E-05 | 0.00170056 | -0.895756 | 0.00015  | 0.00437065 |
| NM_003890.2    | 8857 | FCGBP    | 16390 | 5.4615   | 2.30969  | 0.968251 | 2.49584  | 5.00E-05 | 0.00170056 | 1.25425   | 5.00E-05 | 0.00170056 |
| NM_003897.3    | 8870 | IER3     | 1240  | 35.0216  | 27.5977  | 10.9513  | 1.67714  | 5.00E-05 | 0.00170056 | 1.33345   | 5.00E-05 | 0.00170056 |
| NM_003955.3    | 9021 | SOCS3    | 2734  | 117.977  | 15.2486  | 3.55188  | 5.05378  | 5.00E-05 | 0.00170056 | 2.10202   | 5.00E-05 | 0.00170056 |



|                |       |          |       |          |          |          |          |          |            |           |          |            |
|----------------|-------|----------|-------|----------|----------|----------|----------|----------|------------|-----------|----------|------------|
| NM_001080508.1 | 1906  | TBX18    | 4070  | 2.05212  | 2.66174  | 5.73194  | -1.48191 | 5.00E-05 | 0.00170056 | -1.10665  | 0.0006   | 0.013408   |
| NM_004683.4    | 9104  | RGN      | 1615  | 1.45765  | 1.84038  | 9.81361  | -2.75114 | 5.00E-05 | 0.00170056 | -2.41478  | 5.00E-05 | 0.00170056 |
| NM_021103.3    | 9168  | TMSB10   | 482   | 1244.13  | 1339.84  | 601.074  | 1.04952  | 5.00E-05 | 0.00170056 | 1.15645   | 5.00E-05 | 0.00170056 |
| NM_005097.2    | 9211  | LG1      | 2366  | 2.39658  | 4.21462  | 0.473709 | 2.3389   | 5.00E-05 | 0.00170056 | 3.15333   | 5.00E-05 | 0.00170056 |
| NM_004744.3    | 9227  | LRAT     | 4888  | 0.144844 | 0.406415 | 7.35898  | -5.66694 | 5.00E-05 | 0.00170056 | -4.17848  | 5.00E-05 | 0.00170056 |
| NM_004751.2    | 9245  | GCNT3    | 2222  | 8.69937  | 5.7908   | 1.53688  | 2.50091  | 5.00E-05 | 0.00170056 | 1.91376   | 5.00E-05 | 0.00170056 |
| NM_004787.1    | 9353  | SLIT2    | 4950  | 9.02891  | 6.46368  | 55.0618  | -2.60843 | 5.00E-05 | 0.00170056 | -3.09062  | 5.00E-05 | 0.00170056 |
| NM_004274.4    | 9472  | AKAP6    | 10387 | 5.29712  | 7.24343  | 11.8848  | -1.16584 | 5.00E-05 | 0.00170056 | -0.714375 | 0.0025   | 0.0397144  |
| NM_001105556.1 | 9473  | C1orf38  | 2723  | 16.0843  | 13.0308  | 4.60949  | 1.80297  | 5.00E-05 | 0.00170056 | 1.49925   | 5.00E-05 | 0.00170056 |
| NM_006988.3    | 9510  | ADAMTS1  | 4651  | 107.144  | 46.9244  | 11.7692  | 3.18646  | 5.00E-05 | 0.00170056 | 1.99532   | 5.00E-05 | 0.00170056 |
| NM_004877.2    | 9535  | GMFG     | 657   | 54.6316  | 50.1102  | 20.698   | 1.40025  | 5.00E-05 | 0.00170056 | 1.27562   | 0.0001   | 0.00312189 |
| NM_004288.4    | 9595  | CYTIP    | 2210  | 59.8032  | 48.1469  | 26.2065  | 1.1903   | 5.00E-05 | 0.00170056 | 0.877521  | 0.00075  | 0.0159498  |
| NM_006536.5    | 9635  | CLCA2    | 4025  | 9.59893  | 6.52949  | 2.5704   | 1.90088  | 5.00E-05 | 0.00170056 | 1.34498   | 0.00035  | 0.00869612 |
| NM_014674.2    | 9695  | EDEM1    | 6153  | 29.5093  | 23.8921  | 12.1409  | 1.2813   | 5.00E-05 | 0.00170056 | 0.976661  | 0.0001   | 0.00312189 |
| NM_014675.3    | 9696  | CROCC    | 6656  | 4.96803  | 5.33402  | 11.6895  | -1.23446 | 5.00E-05 | 0.00170056 | -1.13191  | 5.00E-05 | 0.00170056 |
| NM_014685.2    | 9709  | HERPUD1  | 2176  | 111.498  | 106.739  | 49.9015  | 1.15986  | 5.00E-05 | 0.00170056 | 1.09693   | 5.00E-05 | 0.00170056 |
| NM_014737.2    | 9770  | RASSF2   | 5426  | 44.2518  | 25.4755  | 12.0377  | 1.87818  | 5.00E-05 | 0.00170056 | 1.08155   | 5.00E-05 | 0.00170056 |
| NM_012301.3    | 9863  | MAGI2    | 6880  | 2.93304  | 3.06891  | 6.31978  | -1.10748 | 5.00E-05 | 0.00170056 | -1.04215  | 5.00E-05 | 0.00170056 |
| NM_005114.2    | 9957  | HS3ST1   | 1965  | 25.9978  | 23.8248  | 6.63289  | 1.97068  | 5.00E-05 | 0.00170056 | 1.84476   | 5.00E-05 | 0.00170056 |
| NM_005130.3    | 9982  | FGFBP1   | 1182  | 7.63529  | 4.68987  | 0.744421 | 3.35849  | 5.00E-05 | 0.00170056 | 2.65536   | 5.00E-05 | 0.00170056 |
| NM_005467.3    | 10003 | NAALAD2  | 3196  | 3.64783  | 4.35563  | 9.39162  | -1.36434 | 5.00E-05 | 0.00170056 | -1.10849  | 0.00025  | 0.00665625 |
| NM_005746.2    | 10135 | NAMPT    | 4582  | 109.804  | 78.8086  | 33.1088  | 1.72964  | 5.00E-05 | 0.00170056 | 1.25114   | 5.00E-05 | 0.00170056 |
| NM_025195.2    | 10221 | TRIB1    | 3633  | 39.9782  | 19.9818  | 7.00342  | 2.51308  | 5.00E-05 | 0.00170056 | 1.51256   | 5.00E-05 | 0.00170056 |
| NM_080283.3    | 10350 | ABCA9    | 6301  | 3.89484  | 4.62366  | 10.4484  | -1.42365 | 5.00E-05 | 0.00170056 | -1.17618  | 5.00E-05 | 0.00170056 |
| NM_006332.3    | 10437 | IFI30    | 1032  | 108.255  | 104.067  | 25.0932  | 2.10906  | 5.00E-05 | 0.00170056 | 2.05214   | 5.00E-05 | 0.00170056 |
| NM_031456.3    | 10517 | FBXW10   | 3439  | 0.687069 | 1.51755  | 3.57936  | -2.38117 | 5.00E-05 | 0.00170056 | -1.23796  | 0.00085  | 0.0176689  |
| NM_006406.1    | 10549 | PRDX4    | 921   | 87.0289  | 86.3149  | 34.3174  | 1.34255  | 5.00E-05 | 0.00170056 | 1.33067   | 5.00E-05 | 0.00170056 |
| NM_006469.4    | 10625 | IVNS1ABP | 4199  | 125.692  | 87.5578  | 49.9464  | 1.33144  | 5.00E-05 | 0.00170056 | 0.809855  | 0.00125  | 0.02372    |
| NM_006636.3    | 10797 | MTHFD2   | 2188  | 21.7496  | 22.7176  | 8.87822  | 1.29265  | 5.00E-05 | 0.00170056 | 1.35547   | 5.00E-05 | 0.00170056 |
| NM_006639.2    | 10800 | CYSLTR1  | 1514  | 20.5954  | 15.7628  | 7.66382  | 1.42618  | 5.00E-05 | 0.00170056 | 1.04039   | 0.001    | 0.0199964  |
| NM_032385.3    | 10826 | C5orf4   | 2997  | 9.1989   | 11.8357  | 20.1378  | -1.13037 | 5.00E-05 | 0.00170056 | -0.766755 | 0.00315  | 0.0471261  |
| NM_006875.3    | 11040 | PIM2     | 2187  | 61.1768  | 52.7422  | 7.95323  | 2.94337  | 5.00E-05 | 0.00170056 | 2.72935   | 5.00E-05 | 0.00170056 |
| NM_007038.3    | 11096 | ADAMTS5  | 9663  | 1.9889   | 3.5609   | 6.34585  | -1.67384 | 5.00E-05 | 0.00170056 | -0.833573 | 0.001    | 0.0199964  |
| NM_007072.2    | 11148 | HHLA2    | 2660  | 2.21665  | 1.35291  | 7.80557  | -1.81612 | 5.00E-05 | 0.00170056 | -2.52844  | 5.00E-05 | 0.00170056 |
| NM_197941.2    | 11174 | ADAMTS6  | 7268  | 3.10697  | 2.94526  | 1.34298  | 1.21007  | 5.00E-05 | 0.00170056 | 1.13295   | 0.00025  | 0.00665625 |
| NM_007231.3    | 11254 | SLC6A14  | 4564  | 106.149  | 59.3198  | 29.2591  | 1.85914  | 5.00E-05 | 0.00170056 | 1.01963   | 5.00E-05 | 0.00170056 |
| NM_007361.3    | 22795 | NID2     | 5046  | 8.98417  | 5.57244  | 21.1646  | -1.23619 | 5.00E-05 | 0.00170056 | -1.92527  | 5.00E-05 | 0.00170056 |
| NM_007350.3    | 22822 | PHLDA1   | 5913  | 26.4457  | 14.7214  | 5.7379   | 2.20444  | 5.00E-05 | 0.00170056 | 1.35932   | 5.00E-05 | 0.00170056 |
| NM_012309.3    | 22941 | SHANK2   | 10495 | 2.13441  | 1.83589  | 4.74797  | -1.15347 | 5.00E-05 | 0.00170056 | -1.37083  | 5.00E-05 | 0.00170056 |
| NM_025153.2    | 23120 | ATP10B   | 7566  | 2.20884  | 10.5547  | 0.633624 | 1.80159  | 5.00E-05 | 0.00170056 | 4.05811   | 5.00E-05 | 0.00170056 |
| NM_001033602.2 | 23281 | MTUS2    | 6939  | 0.319814 | 0.311843 | 1.43098  | -2.16171 | 5.00E-05 | 0.00170056 | -2.19812  | 5.00E-05 | 0.00170056 |
| NM_021149.2    | 23406 | COTL1    | 1827  | 63.6715  | 38.2875  | 17.5866  | 1.85617  | 5.00E-05 | 0.00170056 | 1.1224    | 5.00E-05 | 0.00170056 |
| NM_012198.3    | 25801 | GCA      | 3226  | 17.687   | 14.0182  | 6.82261  | 1.3743   | 5.00E-05 | 0.00170056 | 1.0389    | 0.00015  | 0.00437065 |
| NM_015444.2    | 25907 | TMEM158  | 1859  | 3.13113  | 2.17294  | 0.548307 | 2.51363  | 5.00E-05 | 0.00170056 | 1.98659   | 0.00055  | 0.0124813  |
| NM_015515.3    | 25984 | KRT23    | 2147  | 25.4554  | 48.4544  | 10.4588  | 1.28325  | 5.00E-05 | 0.00170056 | 2.21191   | 5.00E-05 | 0.00170056 |
| NM_207303.2    | 26033 | ATRN1    | 8732  | 3.52654  | 5.13191  | 8.98249  | -1.34886 | 5.00E-05 | 0.00170056 | -0.807618 | 0.00105  | 0.0207193  |
| NM_015668.3    | 26166 | RGS22    | 4184  | 9.38407  | 16.2235  | 28.5281  | -1.6041  | 5.00E-05 | 0.00170056 | -0.814297 | 0.00185  | 0.0317167  |
| NM_012108.2    | 26228 | STAP1    | 1511  | 13.8144  | 14.2708  | 5.70392  | 1.27615  | 5.00E-05 | 0.00170056 | 1.32304   | 5.00E-05 | 0.00170056 |
| NM_015693.3    | 27152 | INTU     | 3275  | 7.3657   | 11.515   | 20.2313  | -1.4577  | 5.00E-05 | 0.00170056 | -0.813071 | 0.00135  | 0.0250595  |
| NM_198428.2    | 27241 | BBS9     | 4019  | 12.957   | 15.278   | 27.5062  | -1.08603 | 5.00E-05 | 0.00170056 | -0.8483   | 0.00065  | 0.0142695  |
| 28526          | 28526 | -        | 1510  | 8.43269  | 7.67714  | 2.50311  | 1.75227  | 5.00E-05 | 0.00170056 | 1.61685   | 5.00E-05 | 0.00170056 |
| NM_001101312.1 | 28959 | TMEM176B | 1298  | 57.5183  | 51.8125  | 19.574   | 1.55508  | 5.00E-05 | 0.00170056 | 1.40436   | 5.00E-05 | 0.00170056 |
| NM_014079.3    | 28999 | KLF15    | 2525  | 1.22461  | 2.07674  | 4.99131  | -2.0271  | 5.00E-05 | 0.00170056 | -1.2651   | 0.00045  | 0.0106989  |
| NM_013381.2    | 29953 | TRHDE    | 5552  | 0.335649 | 0.875037 | 3.75703  | -3.48457 | 5.00E-05 | 0.00170056 | -2.10218  | 5.00E-05 | 0.00170056 |

|                |       |          |       |          |          |          |          |          |            |           |          |            |
|----------------|-------|----------|-------|----------|----------|----------|----------|----------|------------|-----------|----------|------------|
| NM_015914.5    | 51061 | TXNDC11  | 3047  | 32.1322  | 30.3862  | 13.9276  | 1.20607  | 5.00E-05 | 0.00170056 | 1.12547   | 0.0001   | 0.00312189 |
| NM_015931.1    | 51066 | C3orf32  | 1545  | 0.348944 | 0.50087  | 2.79847  | -3.00357 | 5.00E-05 | 0.00170056 | -2.48213  | 0.0001   | 0.00312189 |
| NM_016010.2    | 51101 | FAM164A  | 3352  | 14.1508  | 17.1619  | 28.8579  | -1.02809 | 5.00E-05 | 0.00170056 | -0.749754 | 0.00185  | 0.0317167  |
| NM_016459.3    | 51237 | MZB1     | 827   | 76.7114  | 95.5045  | 25.3635  | 1.59669  | 5.00E-05 | 0.00170056 | 1.91282   | 5.00E-05 | 0.00170056 |
| NM_016644.1    | 51334 | PRR16    | 1764  | 2.36126  | 1.35465  | 0.422426 | 2.48279  | 5.00E-05 | 0.00170056 | 1.68115   | 0.0031   | 0.0465955  |
| NM_016240.2    | 51435 | SCARA3   | 3631  | 8.19438  | 8.51071  | 19.6595  | -1.26252 | 5.00E-05 | 0.00170056 | -1.20787  | 5.00E-05 | 0.00170056 |
| NM_016529.4    | 51761 | ATP8A2   | 5006  | 4.69777  | 1.86093  | 0.805169 | 2.54461  | 5.00E-05 | 0.00170056 | 1.20866   | 0.0027   | 0.0421065  |
| NM_017423.2    | 51809 | GALNT7   | 4307  | 27.9977  | 22.7749  | 11.8354  | 1.24221  | 5.00E-05 | 0.00170056 | 0.944341  | 0.00025  | 0.00665625 |
| NM_018557.2    | 53353 | LRP1B    | 16531 | 6.23523  | 5.0119   | 31.27    | -2.32627 | 5.00E-05 | 0.00170056 | -2.64135  | 5.00E-05 | 0.00170056 |
| NM_144717.3    | 53833 | IL20RB   | 2047  | 10.9365  | 11.4139  | 3.4085   | 1.68194  | 5.00E-05 | 0.00170056 | 1.74358   | 5.00E-05 | 0.00170056 |
| NM_019050.2    | 54532 | USP53    | 6595  | 32.0426  | 24.8874  | 91.3625  | -1.51161 | 5.00E-05 | 0.00170056 | -1.87618  | 5.00E-05 | 0.00170056 |
| NM_001200049.1 | 54777 | C10orf92 | 3164  | 1.01772  | 1.94165  | 4.63382  | -2.18686 | 5.00E-05 | 0.00170056 | -1.25492  | 0.0007   | 0.015106   |
| NM_017709.3    | 54855 | FAM46C   | 5720  | 61.9506  | 73.8697  | 27.8846  | 1.15165  | 5.00E-05 | 0.00170056 | 1.40551   | 5.00E-05 | 0.00170056 |
| NM_017839.4    | 54947 | LPCAT2   | 5388  | 20.1654  | 10.5208  | 6.29546  | 1.6795   | 5.00E-05 | 0.00170056 | 0.740861  | 0.00275  | 0.0426687  |
| NM_018286.2    | 55273 | TMEM100  | 1755  | 11.2743  | 20.2749  | 55.7012  | -2.30467 | 5.00E-05 | 0.00170056 | -1.45801  | 5.00E-05 | 0.00170056 |
| NM_018407.4    | 55353 | LAPTM4B  | 2238  | 39.8211  | 28.0431  | 15.4569  | 1.36528  | 5.00E-05 | 0.00170056 | 0.859399  | 0.0008   | 0.0168217  |
| NM_001173463.1 | 55605 | KIF21A   | 6530  | 23.7067  | 29.0202  | 50.1285  | -1.08034 | 5.00E-05 | 0.00170056 | -0.788572 | 0.0025   | 0.0397144  |
| NM_018897.2    | 56171 | DNAH7    | 12394 | 9.65151  | 24.3824  | 44.9611  | -2.21985 | 5.00E-05 | 0.00170056 | -0.882837 | 0.00135  | 0.0250595  |
| NM_020130.3    | 56892 | C8orf4   | 1833  | 124.593  | 69.3577  | 15.0847  | 3.04607  | 5.00E-05 | 0.00170056 | 2.20097   | 5.00E-05 | 0.00170056 |
| NM_020183.3    | 56938 | ARNTL2   | 1930  | 12.6242  | 9.51237  | 3.62337  | 1.80079  | 5.00E-05 | 0.00170056 | 1.39247   | 5.00E-05 | 0.00170056 |
| NM_020299.4    | 57016 | AKR1B10  | 1596  | 6.47911  | 3.95944  | 1.1011   | 2.55685  | 5.00E-05 | 0.00170056 | 1.84635   | 0.00035  | 0.00869612 |
| NM_020406.2    | 57126 | CD177    | 2364  | 9.13642  | 13.8532  | 1.36081  | 2.74716  | 5.00E-05 | 0.00170056 | 3.34768   | 5.00E-05 | 0.00170056 |
| NM_207517.2    | 57188 | ADAMTSL3 | 7336  | 1.00455  | 2.21176  | 5.16367  | -2.36184 | 5.00E-05 | 0.00170056 | -1.2232   | 5.00E-05 | 0.00170056 |
| NM_020672.1    | 57402 | S100A14  | 1043  | 36.358   | 27.7038  | 13.6965  | 1.40847  | 5.00E-05 | 0.00170056 | 1.01628   | 0.0012   | 0.0230244  |
| NM_020693.2    | 57453 | DSCAML1  | 6899  | 0.235658 | 0.346787 | 1.03849  | -2.13973 | 5.00E-05 | 0.00170056 | -1.58237  | 0.00035  | 0.00869612 |
| NM_020802.2    | 57562 | KIAA1377 | 7043  | 6.8155   | 9.97199  | 20.8934  | -1.61616 | 5.00E-05 | 0.00170056 | -1.0671   | 5.00E-05 | 0.00170056 |
| NM_001099677.1 | 57604 | KIAA1456 | 9300  | 3.24096  | 3.14456  | 9.92966  | -1.61532 | 5.00E-05 | 0.00170056 | -1.36794  | 0.00015  | 0.00437065 |
| NM_020974.2    | 57758 | SCUBE2   | 4536  | 1.66733  | 1.92054  | 6.48128  | -1.95874 | 5.00E-05 | 0.00170056 | -1.75476  | 5.00E-05 | 0.00170056 |
| NM_021572.4    | 59084 | ENPP5    | 2943  | 18.8783  | 22.3109  | 46.0303  | -1.28585 | 5.00E-05 | 0.00170056 | -1.04483  | 5.00E-05 | 0.00170056 |
| NM_001156474.1 | 60494 | CCDC81   | 2781  | 3.36532  | 3.25861  | 13.5553  | -2.01004 | 5.00E-05 | 0.00170056 | -2.05652  | 5.00E-05 | 0.00170056 |
| NM_021928.3    | 60559 | SPCS3    | 4596  | 88.1756  | 91.5712  | 42.2901  | 1.06006  | 5.00E-05 | 0.00170056 | 1.11458   | 5.00E-05 | 0.00170056 |
| NM_022097.2    | 63928 | CHP2     | 2366  | 2.0191   | 5.60138  | 12.9581  | -2.68206 | 5.00E-05 | 0.00170056 | -1.21     | 0.00025  | 0.00665625 |
| NM_022136.3    | 64092 | SAMSN1   | 1888  | 74.1493  | 34.2492  | 12.2431  | 2.59847  | 5.00E-05 | 0.00170056 | 1.48411   | 5.00E-05 | 0.00170056 |
| NM_024164.5    | 64499 | TPSB2    | 1166  | 15.8194  | 11.7505  | 5.04708  | 1.64818  | 5.00E-05 | 0.00170056 | 1.2192    | 0.0018   | 0.0310732  |
| NM_031898.2    | 64518 | TEKT3    | 1784  | 0.90014  | 1.5255   | 3.70959  | -2.04304 | 5.00E-05 | 0.00170056 | -1.28197  | 0.00275  | 0.0426687  |
| NM_194071.2    | 64764 | CREB3L2  | 7455  | 33.1735  | 25.6763  | 14.7643  | 1.16792  | 5.00E-05 | 0.00170056 | 0.798327  | 0.00055  | 0.0124813  |
| NM_001031716.2 | 64859 | OBFC2A   | 3849  | 56.9536  | 37.2567  | 22.2308  | 1.35723  | 5.00E-05 | 0.00170056 | 0.744942  | 0.00205  | 0.0341961  |
| NM_023940.2    | 65997 | RASL11B  | 1957  | 5.5833   | 5.9534   | 19.4123  | -1.79778 | 5.00E-05 | 0.00170056 | -1.70519  | 5.00E-05 | 0.00170056 |
| NM_024329.5    | 79180 | EFHD2    | 2419  | 29.5684  | 25.4191  | 12.1345  | 1.28494  | 5.00E-05 | 0.00170056 | 1.0668    | 5.00E-05 | 0.00170056 |
| NM_024560.2    | 79611 | ACSS3    | 3033  | 5.82008  | 7.52203  | 19.9558  | -1.7777  | 5.00E-05 | 0.00170056 | -1.40761  | 5.00E-05 | 0.00170056 |
| NM_024574.3    | 79625 | NDNF     | 2871  | 3.33565  | 2.32929  | 12.2793  | -1.88018 | 5.00E-05 | 0.00170056 | -2.39826  | 5.00E-05 | 0.00170056 |
| NM_024677.4    | 79730 | NSUN7    | 3698  | 6.82306  | 9.58667  | 21.2879  | -1.64155 | 5.00E-05 | 0.00170056 | -1.15094  | 5.00E-05 | 0.00170056 |
| NM_024721.4    | 79776 | ZFHX4    | 13958 | 3.27587  | 3.57141  | 9.54205  | -1.54242 | 5.00E-05 | 0.00170056 | -1.4178   | 5.00E-05 | 0.00170056 |
| NM_024783.3    | 79841 | AGBL2    | 3593  | 4.97866  | 9.67783  | 16.3753  | -1.71769 | 5.00E-05 | 0.00170056 | -0.758768 | 0.0031   | 0.0465955  |
| NM_024913.4    | 79974 | C7orf58  | 5320  | 5.19445  | 7.07342  | 14.1535  | -1.44612 | 5.00E-05 | 0.00170056 | -1.00068  | 0.00015  | 0.00437065 |
| NM_001142966.1 | 80000 | GREB1L   | 6052  | 1.16724  | 0.909657 | 5.39672  | -2.20898 | 5.00E-05 | 0.00170056 | -2.56869  | 5.00E-05 | 0.00170056 |
| NM_025159.2    | 80231 | CXorf21  | 1927  | 9.49256  | 7.87925  | 3.16143  | 1.58622  | 5.00E-05 | 0.00170056 | 1.31748   | 0.0001   | 0.00312189 |
| NM_025208.4    | 80310 | PDGFD    | 3993  | 17.927   | 14.3447  | 50.6722  | -1.49906 | 5.00E-05 | 0.00170056 | -1.82067  | 5.00E-05 | 0.00170056 |
| NM_001080427.1 | 80731 | THSD7B   | 5846  | 0.413448 | 0.298006 | 2.51427  | -2.60436 | 5.00E-05 | 0.00170056 | -3.07673  | 5.00E-05 | 0.00170056 |
| NM_030782.3    | 81037 | CLPTM1L  | 2148  | 42.3752  | 35.1958  | 20.7687  | 1.02881  | 5.00E-05 | 0.00170056 | 0.760991  | 0.00185  | 0.0317167  |
| NM_030810.3    | 81567 | TXNDC5   | 3231  | 313.722  | 328.051  | 108.516  | 1.53158  | 5.00E-05 | 0.00170056 | 1.59601   | 5.00E-05 | 0.00170056 |
| NM_030926.4    | 81618 | ITM2C    | 2073  | 59.6746  | 57.9318  | 24.8347  | 1.26476  | 5.00E-05 | 0.00170056 | 1.222     | 5.00E-05 | 0.00170056 |
| NM_030938.3    | 81671 | VMP1     | 2176  | 117.521  | 73.8535  | 42.9597  | 1.45186  | 5.00E-05 | 0.00170056 | 0.781681  | 0.0011   | 0.0214605  |
| NM_031422.4    | 83539 | CHST9    | 2246  | 49.8727  | 59.9675  | 118.083  | -1.24347 | 5.00E-05 | 0.00170056 | -0.977543 | 0.00025  | 0.00665625 |

|                |        |          |       |           |          |          |          |          |            |           |          |            |
|----------------|--------|----------|-------|-----------|----------|----------|----------|----------|------------|-----------|----------|------------|
| NM_031457.1    | 83661  | MS4A8B   | 1353  | 15.5796   | 37.2902  | 72.4867  | -2.21806 | 5.00E-05 | 0.00170056 | -0.95892  | 5.00E-05 | 0.00170056 |
| NM_031935.2    | 83872  | HMCN1    | 18212 | 27.1518   | 37.6918  | 11.1751  | 1.28077  | 5.00E-05 | 0.00170056 | 1.75397   | 5.00E-05 | 0.00170056 |
| NM_032048.2    | 84034  | EMILIN2  | 4009  | 16.7502   | 11.5183  | 5.86863  | 1.51308  | 5.00E-05 | 0.00170056 | 0.972827  | 0.0002   | 0.00554203 |
| NM_032119.3    | 84059  | GPR98    | 19333 | 3.9328    | 4.91004  | 18.2589  | -2.21497 | 5.00E-05 | 0.00170056 | -1.89479  | 5.00E-05 | 0.00170056 |
| NM_032131.4    | 84071  | ARMC2    | 3413  | 6.61246   | 11.2294  | 18.9244  | -1.51698 | 5.00E-05 | 0.00170056 | -0.75297  | 0.00275  | 0.0426687  |
| NM_032291.2    | 84251  | SGIP1    | 4694  | 6.60444   | 2.73182  | 1.11917  | 2.56101  | 5.00E-05 | 0.00170056 | 1.28743   | 0.00075  | 0.0159498  |
| NM_032532.2    | 84624  | FNDC1    | 6551  | 1.57238   | 1.0843   | 4.36865  | -1.47424 | 5.00E-05 | 0.00170056 | -2.01042  | 5.00E-05 | 0.00170056 |
| NM_032704.3    | 84790  | TUBA1C   | 1553  | 38.9999   | 28.469   | 14.6569  | 1.41189  | 5.00E-05 | 0.00170056 | 0.957816  | 0.00045  | 0.0106989  |
| NM_001099294.1 | 85352  | KIAA1644 | 6741  | 0.722345  | 0.920432 | 3.00503  | -2.05662 | 5.00E-05 | 0.00170056 | -1.707    | 5.00E-05 | 0.00170056 |
| NM_014903.4    | 89795  | NAV3     | 9758  | 2.21698   | 3.01626  | 5.85657  | -1.40146 | 5.00E-05 | 0.00170056 | -0.957295 | 0.00045  | 0.0106989  |
| NM_033280.2    | 90701  | SEC11C   | 782   | 151.468   | 211.442  | 70.3127  | 1.10716  | 5.00E-05 | 0.00170056 | 1.58841   | 5.00E-05 | 0.00170056 |
| NM_032160.2    | 92126  | DSEL     | 9281  | 2.92292   | 3.8337   | 6.57699  | -1.17001 | 5.00E-05 | 0.00170056 | -0.77869  | 0.00295  | 0.0449329  |
| NM_001136103.2 | 92293  | TMEM132C | 4947  | 0.257211  | 0.626457 | 5.482    | -4.41368 | 5.00E-05 | 0.00170056 | -3.12942  | 5.00E-05 | 0.00170056 |
| NM_052863.2    | 92304  | SCGB3A1  | 466   | 4.88362   | 8.45061  | 80.549   | -4.04384 | 5.00E-05 | 0.00170056 | -3.25274  | 5.00E-05 | 0.00170056 |
| NM_001040272.5 | 92949  | ADAMTSL1 | 7843  | 1.25487   | 1.80434  | 5.358    | -2.09416 | 5.00E-05 | 0.00170056 | -1.57022  | 5.00E-05 | 0.00170056 |
| NM_144577.3    | 93233  | CCDC114  | 3220  | 2.15727   | 4.41656  | 9.73158  | -2.17346 | 5.00E-05 | 0.00170056 | -1.13975  | 0.00015  | 0.00437065 |
| NM_022073.3    | 112399 | EGLN3    | 2722  | 22.4964   | 40.2903  | 6.64     | 1.76044  | 5.00E-05 | 0.00170056 | 2.60118   | 5.00E-05 | 0.00170056 |
| NM_138426.2    | 113263 | GLCC1    | 4745  | 16.8508   | 17.5286  | 7.93569  | 1.08639  | 5.00E-05 | 0.00170056 | 1.14328   | 5.00E-05 | 0.00170056 |
| NM_052904.3    | 114792 | KLHL32   | 3807  | 1.03989   | 1.82112  | 4.80965  | -2.20949 | 5.00E-05 | 0.00170056 | -1.40111  | 0.00015  | 0.00437065 |
| NM_052947.3    | 115701 | ALPK2    | 7303  | 6.96329   | 6.02987  | 0.905442 | 2.94308  | 5.00E-05 | 0.00170056 | 2.73543   | 5.00E-05 | 0.00170056 |
| NM_054114.3    | 117289 | TAGAP    | 3363  | 17.2271   | 17.5662  | 7.31083  | 1.23657  | 5.00E-05 | 0.00170056 | 1.2647    | 5.00E-05 | 0.00170056 |
| NM_145170.3    | 118491 | TTC18    | 3704  | 10.4075   | 20.0308  | 40.6025  | -1.96394 | 5.00E-05 | 0.00170056 | -1.01935  | 5.00E-05 | 0.00170056 |
| NM_001008781.2 | 120114 | FAT3     | 19048 | 0.287291  | 0.611261 | 5.86196  | -4.3508  | 5.00E-05 | 0.00170056 | -3.26152  | 5.00E-05 | 0.00170056 |
| NM_001098526.1 | 120425 | AMICA1   | 1957  | 62.688    | 28.6569  | 14.4784  | 2.11429  | 5.00E-05 | 0.00170056 | 0.984977  | 0.0022   | 0.0361165  |
| NM_152860.1    | 121340 | SP7      | 2974  | 0.15683   | 0.382827 | 2.13551  | -3.76731 | 5.00E-05 | 0.00170056 | -2.47982  | 5.00E-05 | 0.00170056 |
| NM_145172.3    | 126820 | WDR63    | 3007  | 6.83313   | 18.9917  | 31.7857  | -2.21776 | 5.00E-05 | 0.00170056 | -0.743008 | 0.0028   | 0.0432452  |
| NM_152376.3    | 127733 | UBXN10   | 2972  | 12.5561   | 28.6263  | 47.6268  | -1.92338 | 5.00E-05 | 0.00170056 | -0.734432 | 0.00195  | 0.0329693  |
| NM_152377.2    | 127795 | C1orf87  | 2028  | 5.88121   | 16.2069  | 29.0239  | -2.30306 | 5.00E-05 | 0.00170056 | -0.840636 | 0.00115  | 0.0222874  |
| NM_080607.2    | 128434 | VSTM2L   | 1966  | 2.37048   | 3.29723  | 9.42846  | -1.99184 | 5.00E-05 | 0.00170056 | -1.51577  | 5.00E-05 | 0.00170056 |
| NM_001085447.1 | 129881 | C2orf77  | 2169  | 6.0993    | 12.3097  | 21.6062  | -1.82473 | 5.00E-05 | 0.00170056 | -0.811648 | 0.003    | 0.0454886  |
| NM_001127391.1 | 130540 | ALS2CR12 | 1944  | 3.72552   | 8.60666  | 16.0725  | -2.10908 | 5.00E-05 | 0.00170056 | -0.901067 | 0.00275  | 0.0426687  |
| NM_182500.2    | 130813 | C2orf50  | 1056  | 1.11889   | 2.72954  | 6.83274  | -2.61039 | 5.00E-05 | 0.00170056 | -1.3238   | 0.002    | 0.0335868  |
| NM_138806.3    | 131450 | CD200R1  | 2272  | 18.6071   | 9.34796  | 4.05556  | 2.19788  | 5.00E-05 | 0.00170056 | 1.20475   | 0.0009   | 0.0184743  |
| NM_130830.4    | 131578 | LRRC15   | 5883  | 0.928249  | 0.527111 | 4.55081  | -2.29354 | 5.00E-05 | 0.00170056 | -3.10995  | 5.00E-05 | 0.00170056 |
| NM_080826.1    | 140862 | ISM1     | 2592  | 0.361083  | 0.451919 | 3.53493  | -3.29128 | 5.00E-05 | 0.00170056 | -2.96754  | 5.00E-05 | 0.00170056 |
| NM_001018071.3 | 143162 | FRMPD2   | 5024  | 2.91976   | 5.3588   | 10.6401  | -1.86558 | 5.00E-05 | 0.00170056 | -0.989524 | 0.00015  | 0.00437065 |
| NM_001135091.1 | 143662 | MUC15    | 3392  | 7.76574   | 14.0165  | 27.42    | -1.82003 | 5.00E-05 | 0.00170056 | -0.968098 | 0.0001   | 0.00312189 |
| XM_001715090.3 | 144535 | C12orf55 | 5721  | 7.68912   | 16.3407  | 29.9599  | -1.96214 | 5.00E-05 | 0.00170056 | -0.874561 | 0.00035  | 0.00869612 |
| NM_173615.3    | 146177 | VWA3A    | 4600  | 3.97837   | 5.90151  | 11.1983  | -1.49303 | 5.00E-05 | 0.00170056 | -0.92412  | 0.00025  | 0.00665625 |
| NM_020877.2    | 146754 | DNAH2    | 13505 | 3.60199   | 5.95256  | 10.7199  | -1.57343 | 5.00E-05 | 0.00170056 | -0.848715 | 0.00045  | 0.0106989  |
| NM_133459.3    | 147372 | CCBE1    | 6260  | 0.377326  | 0.319426 | 3.31121  | -3.13348 | 5.00E-05 | 0.00170056 | -3.37381  | 5.00E-05 | 0.00170056 |
| NM_153221.2    | 148113 | CILP2    | 4199  | 0.0646116 | 0.229136 | 2.31852  | -5.16527 | 5.00E-05 | 0.00170056 | -3.33893  | 5.00E-05 | 0.00170056 |
| NM_173354.3    | 150094 | SIK1     | 4706  | 45.1877   | 14.1567  | 4.40303  | 3.35936  | 5.00E-05 | 0.00170056 | 1.68492   | 5.00E-05 | 0.00170056 |
| NM_145912.5    | 150372 | NFAM1    | 5605  | 2.98475   | 2.30641  | 1.12952  | 1.4019   | 5.00E-05 | 0.00170056 | 1.02994   | 0.00295  | 0.0449329  |
| NM_153228.2    | 162282 | ANKFN1   | 2426  | 3.15844   | 4.73041  | 10.9039  | -1.78755 | 5.00E-05 | 0.00170056 | -1.2048   | 0.00025  | 0.00665625 |
| NM_152598.2    | 162333 | MARCH10  | 3101  | 1.5887    | 3.47258  | 8.47365  | -2.41514 | 5.00E-05 | 0.00170056 | -1.28697  | 5.00E-05 | 0.00170056 |
| NM_199280.2    | 165186 | FAM179A  | 3548  | 3.82214   | 5.7623   | 10.5229  | -1.46108 | 5.00E-05 | 0.00170056 | -0.868811 | 0.0021   | 0.0348574  |
| NM_153362.2    | 167681 | PRSS35   | 2503  | 1.18412   | 1.60902  | 5.56998  | -2.23386 | 5.00E-05 | 0.00170056 | -1.79149  | 5.00E-05 | 0.00170056 |
| NM_144980.3    | 168090 | C6orf118 | 1839  | 6.11382   | 12.7925  | 25.5535  | -2.06337 | 5.00E-05 | 0.00170056 | -0.998217 | 0.0003   | 0.00772176 |
| NM_152632.3    | 170063 | CXorf22  | 3613  | 7.50052   | 16.8435  | 28.8899  | -1.9455  | 5.00E-05 | 0.00170056 | -0.778376 | 0.00155  | 0.0278206  |
| NM_153183.2    | 170685 | NUDT10   | 2001  | 22.8247   | 13.0267  | 3.37292  | 2.75853  | 5.00E-05 | 0.00170056 | 1.9494    | 5.00E-05 | 0.00170056 |
| NM_207437.3    | 196385 | DNAH10   | 13680 | 6.57225   | 11.213   | 23.8282  | -1.85821 | 5.00E-05 | 0.00170056 | -1.08749  | 0.0001   | 0.00312189 |
| NM_173543.2    | 199221 | DZIP1L   | 3498  | 4.02872   | 5.60001  | 10.6107  | -1.39713 | 5.00E-05 | 0.00170056 | -0.922023 | 0.00225  | 0.0367046  |
| NM_001004303.4 | 199920 | C1orf168 | 3460  | 2.06803   | 4.61639  | 10.1833  | -2.29988 | 5.00E-05 | 0.00170056 | -1.14137  | 0.0001   | 0.00312189 |

|                |           |             |       |          |          |          |          |          |            |           |          |            |
|----------------|-----------|-------------|-------|----------|----------|----------|----------|----------|------------|-----------|----------|------------|
| NM_001195811.1 | 200150    | PLD5        | 3018  | 0.587491 | 0.576669 | 7.00164  | -3.57505 | 5.00E-05 | 0.00170056 | -3.60188  | 5.00E-05 | 0.00170056 |
| NM_144992.4    | 200403    | VWA3B       | 4747  | 5.95631  | 10.3993  | 18.6574  | -1.64726 | 5.00E-05 | 0.00170056 | -0.843257 | 0.00045  | 0.0106989  |
| NM_178504.4    | 201625    | DNAH12      | 9542  | 12.8389  | 25.6993  | 45.6945  | -1.83149 | 5.00E-05 | 0.00170056 | -0.830292 | 0.003    | 0.0454886  |
| NM_145000.3    | 202151    | RANBP3L     | 2543  | 0.511382 | 0.806251 | 2.49278  | -2.28528 | 5.00E-05 | 0.00170056 | -1.62846  | 0.00025  | 0.00665625 |
| NM_173549.2    | 203111    | C8orf47     | 1550  | 8.76943  | 12.5778  | 26.9158  | -1.6179  | 5.00E-05 | 0.00170056 | -1.09757  | 0.00065  | 0.0142695  |
| NM_152750.4    | 222256    | CDHR3       | 6500  | 11.7392  | 27.2359  | 50.6512  | -2.10926 | 5.00E-05 | 0.00170056 | -0.895088 | 0.0006   | 0.013408   |
| NM_172239.4    | 254958    | REXO1L1     | 7032  | 3.62701  | 13.632   | 24.4886  | -2.75526 | 5.00E-05 | 0.00170056 | -0.845111 | 0.0018   | 0.0310732  |
| NM_194302.2    | 255101    | CCDC108     | 5945  | 1.19487  | 2.83059  | 5.20581  | -2.12327 | 5.00E-05 | 0.00170056 | -0.879021 | 0.0029   | 0.0443924  |
| NM_025015.2    | 259217    | HSPA12A     | 5722  | 1.47978  | 1.6324   | 3.58952  | -1.27841 | 5.00E-05 | 0.00170056 | -1.1368   | 0.0005   | 0.0116249  |
| NM_152997.2    | 260436    | C4orf7      | 539   | 100.371  | 600.743  | 19.3682  | 2.37358  | 5.00E-05 | 0.00170056 | 4.95499   | 5.00E-05 | 0.00170056 |
| NM_174975.4    | 266629    | SEC14L3     | 2084  | 10.9827  | 1.07783  | 54.4952  | -2.3109  | 5.00E-05 | 0.00170056 | -5.65992  | 5.00E-05 | 0.00170056 |
| NM_173812.4    | 283417    | DPY19L2     | 4057  | 2.20282  | 1.55026  | 8.58391  | -1.96228 | 5.00E-05 | 0.00170056 | -2.46912  | 5.00E-05 | 0.00170056 |
| NM_173833.5    | 286133    | SCARA5      | 4151  | 3.36922  | 4.76469  | 11.485   | -1.76926 | 5.00E-05 | 0.00170056 | -1.26929  | 5.00E-05 | 0.00170056 |
| NM_001012502.2 | 286207    | C9orf117    | 1722  | 5.48466  | 11.108   | 28.102   | -2.3572  | 5.00E-05 | 0.00170056 | -1.33907  | 5.00E-05 | 0.00170056 |
| NM_173695.2    | 286464    | CXorf59     | 1956  | 6.9319   | 13.6792  | 24.0057  | -1.79205 | 5.00E-05 | 0.00170056 | -0.811391 | 0.00215  | 0.0355296  |
| XM_002343299.3 | 319089    | TTC6        | 2913  | 6.0073   | 6.07558  | 14.5005  | -1.27132 | 5.00E-05 | 0.00170056 | -1.25501  | 5.00E-05 | 0.00170056 |
| NM_199289.1    | 341676    | NEK5        | 2912  | 5.07284  | 13.2112  | 22.3474  | -2.13924 | 5.00E-05 | 0.00170056 | -0.758343 | 0.0025   | 0.0397144  |
| NM_198505.2    | 344905    | ATP13A5     | 3657  | 7.9423   | 1.33878  | 0.202547 | 5.29323  | 5.00E-05 | 0.00170056 | 2.72459   | 5.00E-05 | 0.00170056 |
| NM_198285.2    | 349136    | WDR86       | 2041  | 8.14617  | 6.01338  | 25.095   | -1.6232  | 5.00E-05 | 0.00170056 | -2.06115  | 5.00E-05 | 0.00170056 |
| XM_003118942.2 | 374467    | C12orf63    | 2401  | 6.2977   | 12.83    | 24.4605  | -1.95756 | 5.00E-05 | 0.00170056 | -0.930935 | 0.0004   | 0.00971957 |
| NM_213606.3    | 387700    | SLC16A12    | 4622  | 3.39611  | 3.4552   | 19.0353  | -2.48672 | 5.00E-05 | 0.00170056 | -2.46183  | 5.00E-05 | 0.00170056 |
| NM_001003845.2 | 389058    | SP5         | 1947  | 0.499975 | 0.622839 | 2.53688  | -2.34313 | 5.00E-05 | 0.00170056 | -2.02613  | 0.0001   | 0.00312189 |
| NM_205855.3    | 389558    | FAM180A     | 1801  | 0.482871 | 0.856059 | 3.18214  | -2.72029 | 5.00E-05 | 0.00170056 | -1.89421  | 0.0006   | 0.013408   |
| NM_001001557.2 | 392255    | GDF6        | 3701  | 0.151771 | 0.214651 | 1.32606  | -3.12718 | 5.00E-05 | 0.00170056 | -2.62708  | 5.00E-05 | 0.00170056 |
| NM_001170820.3 | 402778    | IFITM10     | 3709  | 0.698434 | 1.00254  | 2.86259  | -2.03513 | 5.00E-05 | 0.00170056 | -1.51367  | 0.0003   | 0.00772176 |
| NM_001080534.1 | 440279    | UNC13C      | 8140  | 1.18901  | 1.09559  | 4.96343  | -2.06158 | 5.00E-05 | 0.00170056 | -2.17963  | 5.00E-05 | 0.00170056 |
| NM_001010922.2 | 440603    | BCL2L15     | 4973  | 4.73389  | 6.0172   | 1.73169  | 1.45085  | 5.00E-05 | 0.00170056 | 1.79691   | 5.00E-05 | 0.00170056 |
| XM_001716834.2 | 642131    | LOC642131   | 570   | 49.3887  | 81.0706  | 11.6645  | 2.08206  | 5.00E-05 | 0.00170056 | 2.79705   | 5.00E-05 | 0.00170056 |
| NM_001098843.3 | 645090    | CXorf30     | 2863  | 3.5013   | 6.73563  | 15.3101  | -2.12852 | 5.00E-05 | 0.00170056 | -1.1846   | 0.00015  | 0.00437065 |
| NM_001013647.1 | 646851    | LOC646851   | 10322 | 1.77391  | 2.98194  | 5.49157  | -1.63028 | 5.00E-05 | 0.00170056 | -0.880965 | 0.00075  | 0.0159498  |
| XM_003118626.2 | 100506209 | LOC10050620 | 3519  | 1.21469  | 2.3406   | 4.65572  | -1.93842 | 5.00E-05 | 0.00170056 | -0.992128 | 0.00305  | 0.04606    |
| XM_003118966.1 | 100506711 | LOC10050671 | 1898  | 4.06174  | 11.1922  | 20.2473  | -2.31756 | 5.00E-05 | 0.00170056 | -0.855238 | 0.0022   | 0.0361165  |
| XM_003118889.1 | 100506859 | LOC10050685 | 703   | 5.49813  | 9.52558  | 22.1987  | -2.01346 | 5.00E-05 | 0.00170056 | -1.2206   | 0.0015   | 0.0270821  |
| XM_003403451.1 | 100508736 | LOC10050873 | 1567  | 5.48834  | 10.1482  | 19.0839  | -1.79792 | 5.00E-05 | 0.00170056 | -0.91113  | 0.0024   | 0.03848    |

**Table S7. Summary of patient characteristics.**

|                                                                   | <b>Control</b> | <b>ECRSwNP</b> | <b>non-ECRSwNP</b> |
|-------------------------------------------------------------------|----------------|----------------|--------------------|
| Total no. of subjects                                             | 34             | 35             | 31                 |
| Sex, male, n (%)                                                  | 14(41.2)       | 23(65.7)       | 15(48.3)           |
| Age (y), mean ± SD                                                | 46.0±14.1      | 43.0±11.7      | 45.2±10.4          |
| Positive Phadiatop result, n (%)                                  | 2(5.9)         | 10(28.6)       | 5(16.1)            |
| Asthma in history, n (%)                                          | 0(0)           | 7(20.0)        | 0(0)               |
| Peripheral blood eosinophil count (10 <sup>9</sup> /L), mean ± SD | 0.12±0.07      | 0.40±0.14      | 0.15±0.08          |
| Peripheral blood eosinophil percentage (%), mean ± SD             | 1.84±1.05      | 5.62±2.26      | 2.28±1.04          |
| Mean tissue eosinophil count*, mean ± SD                          | 1.5±1.2        | 134.9±72.3     | 4.2±2.3            |
| Total serum IgE (KU/L), mean ± SD                                 | 60.8±104.3     | 140.2±121.0    | 81.8±100.4         |
| Methodology used                                                  |                |                |                    |
| RNA sequencing                                                    | n=3(1 male)    | n=3(3 male)    | n=3(1 male)        |
| Age (y), mean ± SD                                                | 48.7±7.6       | 46.3±3.5       | 47.3±6.1           |
| qRT-PCR                                                           | n=31           | n=32           | n=28               |
| Age (y), mean ± SD                                                | 45.7±14.7      | 42.7±12.1      | 45.0±10.8          |
| in situ hybridization                                             | n=5            | n=5            | n=5                |
| Age (y), mean ± SD                                                | 46.8±16.8      | 33.2±9.8       | 34.6±8.8           |

\*Mean of the eosinophil count of 5 separate HPFs.

**Table S8. Primer pairs used for qRT-PCR experiments.**

| <b>lncRNA Name</b> | <b>Forward Primer (5'-3')</b> | <b>Reverse Primer (5'-3')</b> |
|--------------------|-------------------------------|-------------------------------|
| TCONS_00032728     | TCCGTTTGATTCCGTTTGATGT        | CATCGAATGAATTGAATGCAATCA      |
| TCONS_00070847     | AGGAGTAGCTTAGCAGCAGGAATG      | CCTGCGTCACATTCCATCAAG         |
| TCONS_00208641     | GCAGAAGACAGAGATGAAGAAAAGAA    | GCGTGGTTTCCTGTGCTCAT          |
| TCONS_00223831     | AAACAAGTCTGGGTGGTGCTTG        | CTCCCTGAAGTTGTAAATCCCAGAAC    |
| TCONS_00254761     | CCCATCTGAAAACAGCAACACAG       | CCTGTGGCAGATGCAGTTTTAC        |
| XLOC_010280        | ACTGGGAAGCCACAAGAAAAGATT      | ACAGTGGTCAGTCCTTTCTTGGCT      |
| CCL18              | CGTCTATACCTCCTGGCAGATTCC      | TTAGGAGGATGACACCTGGCTTG       |
